# Supplementary material for: Preparation and Characteristic of Polyurethane Powder Adhesives with Heating Resistance Modified by Nanosilica
Source: Hindawi journal article supplement (doi:10.1155/2022/6384600), 2022-05-13
Supplement: f1 [file 6384600.f1.pdf]

Source Data of “Preparation and characteristic of  
polyurethane powder adhesives with heating resistance  
modified by nano-silica”

Contents

|                     |     |
|---------------------|-----|
| Figure 1            | 2   |
| Figure 2 & Figure 3 | 72  |
| Figure 4            | 113 |
| Figure 6            | 114 |
| Figure 7            | 115 |
| Figure 9            | 117 |
| Figure 10           | 118 |

Figure1. FTIR spectrum of the PPAs

| Wave Number/cm <sup>-1</sup> | PPU      | PPSA     | PPSI     | PPST     | PPSY     |
|------------------------------|----------|----------|----------|----------|----------|
| 399.28204                    | 105.2371 | 105.4762 | 96.42184 | 92.95304 | 99.07705 |
| 400.24648                    | 107.6586 | 104.2873 | 96.65939 | 93.46422 | 99.47213 |
| 401.21093                    | 106.0232 | 103.5449 | 93.30947 | 92.8189  | 98.42387 |
| 402.17538                    | 103.4718 | 102.2926 | 91.0541  | 91.23836 | 97.8824  |
| 403.13983                    | 101.5586 | 100.6166 | 90.47816 | 89.62498 | 97.31398 |
| 404.10428                    | 100.6406 | 100.4355 | 90.73308 | 89.28383 | 98.40617 |
| 405.06873                    | 99.84071 | 100.635  | 89.77678 | 89.64717 | 99.62681 |
| 406.03318                    | 99.86947 | 101.6418 | 89.27403 | 90.4084  | 100.4458 |
| 406.99763                    | 101.174  | 103.0713 | 89.19999 | 90.9498  | 101.0786 |
| 407.96208                    | 101.8069 | 103.1485 | 88.30353 | 90.40993 | 100.2992 |
| 408.92653                    | 101.5298 | 102.1443 | 87.81979 | 89.62792 | 98.95306 |
| 409.89098                    | 101.7975 | 102.3562 | 88.70368 | 89.60881 | 98.71201 |
| 410.85543                    | 102.5094 | 103.2827 | 89.82041 | 90.18995 | 99.75821 |
| 411.81988                    | 103.2666 | 104.4878 | 90.93019 | 90.82063 | 100.5812 |
| 412.78433                    | 103.2646 | 104.8037 | 91.4618  | 90.92701 | 100.5618 |
| 413.74878                    | 103.1197 | 104.6312 | 91.14014 | 90.71813 | 100.5029 |
| 414.71323                    | 103.1561 | 104.6583 | 90.76375 | 90.68139 | 100.2535 |
| 415.67767                    | 103.2296 | 104.3856 | 90.54779 | 90.66897 | 99.94284 |
| 416.64212                    | 103.089  | 103.6234 | 90.82032 | 90.39838 | 99.33224 |
| 417.60657                    | 102.5949 | 103.4538 | 92.68582 | 89.7554  | 97.01078 |
| 418.57102                    | 100.5198 | 103.0705 | 95.98802 | 88.46524 | 93.44398 |
| 419.53547                    | 98.67735 | 102.1659 | 95.29949 | 88.74666 | 96.68359 |
| 420.49992                    | 99.28408 | 101.1926 | 92.37892 | 89.51503 | 98.93214 |
| 421.46437                    | 99.83466 | 101.248  | 91.39518 | 89.84681 | 98.90153 |
| 422.42882                    | 99.97471 | 102.1599 | 91.4583  | 89.98276 | 98.47099 |
| 423.39327                    | 100.2904 | 102.606  | 91.36533 | 90.10223 | 99.67601 |
| 424.35772                    | 100.8023 | 102.1054 | 91.33409 | 90.08143 | 100.6507 |
| 425.32217                    | 100.7036 | 101.7608 | 91.2545  | 88.92196 | 99.79968 |
| 426.28662                    | 100.761  | 101.3908 | 90.56289 | 88.56999 | 99.79423 |
| 427.25107                    | 101.259  | 101.1605 | 90.21205 | 89.0327  | 100.273  |
| 428.21552                    | 101.4751 | 100.7864 | 90.20576 | 89.10642 | 100.2653 |
| 429.17996                    | 102.0072 | 101.0475 | 90.60907 | 89.95136 | 101.0489 |
| 430.14441                    | 102.9784 | 102.0308 | 91.46096 | 91.14788 | 101.8002 |
| 431.10886                    | 103.8439 | 103.3104 | 92.50479 | 91.81817 | 102.0895 |
| 432.07331                    | 103.5611 | 103.5386 | 92.65939 | 92.20033 | 102.0851 |
| 433.03776                    | 102.9633 | 103.3644 | 92.34759 | 92.42849 | 101.6811 |
| 434.00221                    | 102.7471 | 103.1966 | 92.01649 | 92.06142 | 101.4177 |
| 434.96666                    | 103.2712 | 103.7019 | 91.8675  | 91.90766 | 101.6777 |
| 435.93111                    | 103.5228 | 104.3031 | 92.09333 | 92.86947 | 101.5609 |
| 436.89556                    | 103.1841 | 103.5952 | 91.43423 | 92.53713 | 100.6018 |
| 437.86001                    | 103.0027 | 102.7242 | 90.38962 | 91.21322 | 100.612  |
| 438.82446                    | 102.7985 | 102.8616 | 90.17197 | 90.8239  | 101.1288 |
| 439.78891                    | 103.0259 | 103.2798 | 90.78411 | 91.48094 | 101.6371 |
| 440.75336                    | 103.6466 | 103.6592 | 92.08009 | 92.54054 | 102.2311 |
| 441.71781                    | 103.9389 | 103.6793 | 93.55634 | 92.91006 | 102.1559 |
| 442.68226                    | 102.9206 | 102.5328 | 93.34064 | 92.32784 | 101.0982 |
| 443.64671                    | 101.4557 | 101.4876 | 92.38063 | 91.84015 | 100.2029 |
| 444.61116                    | 100.8089 | 101.5358 | 91.94036 | 91.94182 | 100.6917 |
| 445.5756                     | 100.556  | 101.747  | 91.9359  | 92.07229 | 100.6205 |
| 446.54005                    | 100.0257 | 101.5374 | 91.8025  | 91.13823 | 99.19751 |

|           |          |          |          |          |          |
|-----------|----------|----------|----------|----------|----------|
| 447.5045  | 99.95686 | 101.2703 | 91.15141 | 90.28675 | 98.99736 |
| 448.46895 | 100.5554 | 101.5013 | 90.94454 | 90.05001 | 99.6185  |
| 449.4334  | 101.5198 | 102.1072 | 91.27106 | 90.16332 | 100.2443 |
| 450.39785 | 102.5287 | 102.8623 | 92.13343 | 91.08268 | 101.1623 |
| 451.3623  | 103.6289 | 103.8928 | 93.27257 | 92.22975 | 102.2983 |
| 452.32675 | 104.3613 | 105.0559 | 93.93817 | 92.74308 | 102.4958 |
| 453.2912  | 104.5565 | 104.8665 | 93.40776 | 92.07973 | 101.7756 |
| 454.25565 | 104.5163 | 104.0814 | 92.88325 | 91.90159 | 101.9037 |
| 455.2201  | 104.5751 | 103.9803 | 92.77543 | 92.32571 | 102.5105 |
| 456.18455 | 104.9077 | 104.3103 | 92.94242 | 92.09401 | 102.7159 |
| 457.149   | 105.1031 | 104.8481 | 93.33038 | 90.66782 | 102.1632 |
| 458.11345 | 104.2809 | 104.3624 | 92.75245 | 89.90171 | 101.8554 |
| 459.0779  | 103.4563 | 103.3317 | 91.99776 | 90.50195 | 102.22   |
| 460.04235 | 102.9009 | 102.9958 | 91.90596 | 90.70137 | 102.3546 |
| 461.00679 | 102.2878 | 102.6058 | 92.02136 | 90.74543 | 102.0719 |
| 461.97124 | 101.9952 | 102.247  | 92.11758 | 90.86043 | 102.0595 |
| 462.93569 | 102.2114 | 101.9522 | 91.86773 | 91.06394 | 101.682  |
| 463.90014 | 102.5381 | 101.7224 | 91.68638 | 91.103   | 101.0155 |
| 464.86459 | 102.6657 | 101.4711 | 91.65427 | 91.33307 | 100.7244 |
| 465.82904 | 102.5564 | 101.3342 | 91.72131 | 91.5856  | 100.5664 |
| 466.79349 | 102.1961 | 101.1481 | 91.604   | 91.19303 | 99.8854  |
| 467.75794 | 101.9373 | 100.9947 | 91.42266 | 90.46892 | 98.83515 |
| 468.72239 | 102.1558 | 101.181  | 91.46085 | 90.53512 | 99.24354 |
| 469.68684 | 102.4757 | 101.4851 | 91.5597  | 91.07146 | 100.4865 |
| 470.65129 | 102.8191 | 101.915  | 91.86455 | 91.34755 | 101.0207 |
| 471.61574 | 103.49   | 103.1911 | 92.89834 | 91.43772 | 101.0508 |
| 472.58019 | 103.9415 | 104.4798 | 93.7475  | 91.18415 | 101.1955 |
| 473.54464 | 103.5801 | 103.6674 | 92.90331 | 91.24889 | 102.0015 |
| 474.50909 | 103.2408 | 103.231  | 92.50251 | 91.36549 | 102.121  |
| 475.47353 | 103.0395 | 103.2165 | 92.5618  | 91.46059 | 101.9866 |
| 476.43798 | 102.8755 | 102.8977 | 92.56153 | 91.59716 | 102.0299 |
| 477.40243 | 102.8778 | 102.4906 | 92.40802 | 91.59123 | 102.1735 |
| 478.36688 | 103.2678 | 102.5308 | 92.27687 | 91.63848 | 102.2782 |
| 479.33133 | 103.4255 | 102.698  | 92.18282 | 91.57792 | 102.0741 |
| 480.29578 | 103.3795 | 102.7721 | 92.20123 | 91.36758 | 101.8643 |
| 481.26023 | 103.6163 | 102.9391 | 92.31891 | 91.30611 | 101.6857 |
| 482.22468 | 103.8965 | 103.1312 | 92.56262 | 91.6301  | 101.7731 |
| 483.18913 | 104.1269 | 103.5343 | 93.12548 | 91.99447 | 101.7837 |
| 484.15358 | 103.8103 | 103.4558 | 93.24424 | 91.79717 | 101.6148 |
| 485.11803 | 103.4376 | 102.9198 | 92.6962  | 91.79736 | 101.7265 |
| 486.08248 | 103.1415 | 102.6705 | 92.37824 | 91.65856 | 101.5133 |
| 487.04693 | 103.1627 | 102.685  | 92.46037 | 91.5094  | 101.8478 |
| 488.01138 | 103.4456 | 102.9434 | 92.91952 | 91.75661 | 102.2907 |
| 488.97583 | 103.6203 | 103.2716 | 93.20675 | 91.97821 | 102.3983 |
| 489.94027 | 103.4458 | 103.1848 | 93.09192 | 91.84827 | 102.3315 |
| 490.90472 | 103.1709 | 102.9922 | 92.95108 | 91.62205 | 102.0543 |
| 491.86917 | 102.8788 | 102.8573 | 92.83882 | 91.58907 | 101.3567 |
| 492.83362 | 103      | 102.9655 | 92.5917  | 92.08383 | 101.5865 |
| 493.79807 | 103.2173 | 103.1676 | 92.51969 | 92.37215 | 101.9049 |
| 494.76252 | 103.1711 | 103.2113 | 92.37819 | 92.35263 | 101.8645 |
| 495.72697 | 102.9176 | 103.0275 | 92.16995 | 92.29836 | 101.5364 |
| 496.69142 | 102.6589 | 102.9557 | 92.25917 | 92.19168 | 101.4097 |
| 497.65587 | 102.8267 | 103.1308 | 92.55757 | 92.11482 | 101.8607 |
| 498.62032 | 103.1924 | 103.3038 | 92.85593 | 92.11271 | 102.2929 |

|           |          |          |          |          |          |
|-----------|----------|----------|----------|----------|----------|
| 499.58477 | 103.3206 | 103.3273 | 92.95931 | 92.20258 | 102.458  |
| 500.54922 | 103.4476 | 103.5206 | 92.99672 | 92.17582 | 102.5319 |
| 501.51367 | 103.8158 | 104.1262 | 93.32586 | 92.03045 | 102.2079 |
| 502.47812 | 103.9762 | 104.4386 | 93.51144 | 91.94034 | 102.1029 |
| 503.44257 | 103.828  | 104.0172 | 93.357   | 92.30872 | 102.4923 |
| 504.40702 | 103.6805 | 103.7996 | 93.36175 | 92.54325 | 102.3335 |
| 505.37147 | 103.78   | 103.8774 | 93.35311 | 92.60917 | 102.1401 |
| 506.33591 | 103.7565 | 104.1003 | 93.54288 | 92.3429  | 101.5042 |
| 507.30036 | 103.4369 | 104.0919 | 93.41326 | 92.12049 | 101.1805 |
| 508.26481 | 103.4633 | 103.8928 | 93.08502 | 92.40936 | 101.6506 |
| 509.22926 | 103.7902 | 103.9585 | 93.14472 | 92.73012 | 101.9136 |
| 510.19371 | 104.0887 | 104.1574 | 93.37531 | 92.7826  | 102.1687 |
| 511.15816 | 104.0129 | 104.0397 | 93.51705 | 92.71681 | 102.4774 |
| 512.12261 | 103.7676 | 103.8378 | 93.47859 | 92.74678 | 102.5337 |
| 513.08706 | 103.45   | 103.6029 | 93.18306 | 92.64141 | 102.2308 |
| 514.05151 | 103.1678 | 103.2736 | 92.82221 | 92.53562 | 102.0181 |
| 515.01596 | 103.2414 | 103.262  | 92.71542 | 92.68257 | 102.2135 |
| 515.98041 | 103.3697 | 103.5614 | 92.92391 | 92.61652 | 102.1858 |
| 516.94486 | 103.3096 | 103.9711 | 93.26248 | 92.34265 | 101.5671 |
| 517.90931 | 103.3496 | 103.9443 | 93.07267 | 92.4151  | 101.6375 |
| 518.87376 | 103.3385 | 103.8529 | 92.97266 | 92.45181 | 101.6055 |
| 519.83821 | 103.511  | 104.1155 | 93.30027 | 92.64672 | 101.5535 |
| 520.80265 | 103.7562 | 104.0895 | 93.31658 | 92.86839 | 101.9415 |
| 521.7671  | 103.9895 | 104.1311 | 93.49906 | 93.08957 | 102.3539 |
| 522.73155 | 104.1299 | 104.0531 | 93.49891 | 93.17772 | 102.581  |
| 523.696   | 103.9625 | 103.819  | 93.17878 | 93.05188 | 102.3333 |
| 524.66045 | 103.8396 | 103.8945 | 93.0807  | 92.95743 | 102.0341 |
| 525.6249  | 103.8395 | 104.3308 | 93.52751 | 92.91301 | 101.7824 |
| 526.58935 | 103.7728 | 104.1372 | 93.35548 | 93.00704 | 102.2235 |
| 527.5538  | 103.7493 | 103.7235 | 93.02457 | 93.12879 | 102.7519 |
| 528.51825 | 103.6661 | 103.5928 | 92.95664 | 92.89945 | 102.6059 |
| 529.4827  | 103.5755 | 103.6058 | 92.85107 | 92.62838 | 102.371  |
| 530.44715 | 103.7103 | 103.8067 | 92.90938 | 92.51313 | 102.4541 |
| 531.4116  | 103.8724 | 103.9151 | 93.10523 | 92.35471 | 102.5284 |
| 532.37605 | 103.995  | 104.1726 | 93.38003 | 92.38322 | 102.4716 |
| 533.3405  | 103.8894 | 104.1778 | 93.36057 | 92.68464 | 102.3849 |
| 534.30494 | 103.834  | 103.8279 | 93.36307 | 92.76728 | 102.2814 |
| 535.2694  | 103.9107 | 103.7514 | 93.6852  | 92.62121 | 102.2689 |
| 536.23384 | 103.9569 | 103.9578 | 93.87338 | 92.98837 | 102.4037 |
| 537.19829 | 103.8164 | 103.7606 | 93.54507 | 92.95632 | 102.3651 |
| 538.16274 | 103.4429 | 103.4288 | 93.09735 | 92.77585 | 102.2534 |
| 539.12719 | 103.4097 | 103.6708 | 93.08119 | 92.94595 | 102.6046 |
| 540.09164 | 103.7328 | 104.0032 | 93.43746 | 93.16317 | 103.1109 |
| 541.05609 | 103.805  | 104.0606 | 93.73216 | 93.25617 | 103.2646 |
| 542.02054 | 103.6085 | 103.9135 | 93.72798 | 93.11361 | 102.8705 |
| 542.98499 | 103.4929 | 103.8027 | 93.55981 | 92.82157 | 102.5573 |
| 543.94944 | 103.3515 | 103.6654 | 93.39952 | 92.58006 | 102.2839 |
| 544.91389 | 103.3727 | 103.8564 | 93.63591 | 92.77934 | 102.1982 |
| 545.87834 | 103.2995 | 103.8062 | 93.76431 | 92.79039 | 101.9363 |
| 546.84279 | 103.2883 | 103.5144 | 93.69505 | 92.67093 | 101.8744 |
| 547.80724 | 103.3671 | 103.4002 | 93.58469 | 92.75571 | 102.0433 |
| 548.77169 | 103.5355 | 103.5615 | 93.51756 | 93.04867 | 102.3274 |
| 549.73613 | 103.6634 | 103.6062 | 93.34647 | 92.7067  | 102.196  |
| 550.70059 | 103.7525 | 103.6867 | 92.98694 | 92.60461 | 102.2292 |

|           |          |          |          |          |          |
|-----------|----------|----------|----------|----------|----------|
| 551.66503 | 103.6399 | 103.6535 | 93.25372 | 93.11536 | 102.5795 |
| 552.62948 | 103.4855 | 103.3694 | 93.45985 | 93.13307 | 102.6271 |
| 553.59393 | 103.672  | 103.5741 | 93.60503 | 93.36947 | 102.6541 |
| 554.55838 | 103.6064 | 103.7437 | 93.66031 | 93.49542 | 102.4201 |
| 555.52283 | 103.6288 | 103.7359 | 93.3589  | 93.34467 | 102.396  |
| 556.48728 | 103.7318 | 103.8023 | 93.26889 | 93.09452 | 102.5441 |
| 557.45173 | 103.8773 | 103.8343 | 93.2618  | 92.89238 | 102.6487 |
| 558.41618 | 103.7733 | 103.6807 | 93.07298 | 92.77322 | 102.5569 |
| 559.38063 | 103.5392 | 103.4869 | 92.85677 | 92.63248 | 102.3053 |
| 560.34508 | 103.4991 | 103.3553 | 92.79857 | 92.69433 | 102.2513 |
| 561.30953 | 103.5077 | 103.299  | 92.86024 | 92.90201 | 102.2685 |
| 562.27398 | 103.5154 | 103.3321 | 92.95641 | 92.96091 | 102.2009 |
| 563.23843 | 103.4835 | 103.4312 | 93.00891 | 92.85284 | 102.0295 |
| 564.20288 | 103.427  | 103.4467 | 92.99659 | 92.67617 | 101.9464 |
| 565.16733 | 103.4514 | 103.3327 | 92.98287 | 92.5044  | 102.0217 |
| 566.13177 | 103.5671 | 103.3867 | 93.20087 | 92.63956 | 102.0938 |
| 567.09622 | 103.7763 | 103.6406 | 93.55055 | 92.83769 | 102.1329 |
| 568.06067 | 103.9336 | 103.6841 | 93.57506 | 92.88205 | 102.3183 |
| 569.02512 | 103.9172 | 103.5736 | 93.55633 | 92.70612 | 102.2062 |
| 569.98957 | 103.7412 | 103.3869 | 93.40678 | 92.56578 | 102.0828 |
| 570.95402 | 103.5062 | 103.0653 | 93.11847 | 92.49529 | 101.9996 |
| 571.91847 | 103.3964 | 102.8642 | 92.91066 | 92.49477 | 101.8248 |
| 572.88292 | 103.4061 | 102.7248 | 92.8271  | 92.39175 | 101.7344 |
| 573.84737 | 103.4184 | 102.6568 | 92.90459 | 92.31357 | 101.723  |
| 574.81182 | 103.3305 | 102.7652 | 93.00895 | 92.30204 | 101.6134 |
| 575.77627 | 103.2038 | 102.9914 | 93.22261 | 92.27108 | 101.1616 |
| 576.74072 | 103.1795 | 102.7629 | 93.18864 | 92.29858 | 101.1092 |
| 577.70517 | 103.3012 | 102.508  | 93.08114 | 92.37517 | 101.3473 |
| 578.66962 | 103.4158 | 102.5736 | 93.03001 | 92.38923 | 101.4225 |
| 579.63406 | 103.4926 | 102.6138 | 92.99532 | 92.36702 | 101.311  |
| 580.59852 | 103.3462 | 102.516  | 92.95507 | 92.14522 | 100.9708 |
| 581.56296 | 103.2293 | 102.3238 | 92.77302 | 91.96675 | 101.068  |
| 582.52741 | 103.2838 | 102.2803 | 92.74676 | 91.9422  | 101.4496 |
| 583.49186 | 103.329  | 102.4471 | 92.85174 | 92.02822 | 101.5301 |
| 584.45631 | 103.3006 | 102.5506 | 92.92526 | 92.07529 | 101.3631 |
| 585.42076 | 103.3489 | 102.4684 | 92.90546 | 92.16586 | 101.4662 |
| 586.38521 | 103.4431 | 102.4295 | 92.92551 | 92.28669 | 101.6324 |
| 587.34966 | 103.2483 | 102.3165 | 92.73765 | 92.19915 | 101.4675 |
| 588.31411 | 103.0959 | 102.1514 | 92.46862 | 92.06021 | 101.1585 |
| 589.27856 | 103.2169 | 102.2058 | 92.41096 | 92.00088 | 101.1633 |
| 590.24301 | 103.3088 | 102.2756 | 92.56826 | 91.91378 | 101.2628 |
| 591.20746 | 103.3882 | 102.4203 | 92.95476 | 91.88397 | 101.0188 |
| 592.17191 | 103.4361 | 102.6351 | 93.04192 | 91.86659 | 100.8982 |
| 593.13636 | 103.5846 | 102.5876 | 92.81791 | 92.04118 | 101.4393 |
| 594.10081 | 103.7375 | 102.5726 | 92.90113 | 92.17176 | 101.6581 |
| 595.06525 | 103.5587 | 102.3909 | 92.96358 | 92.11784 | 101.4762 |
| 596.0297  | 103.3724 | 102.1628 | 92.88694 | 91.94673 | 101.3983 |
| 596.99415 | 103.4921 | 102.231  | 92.82904 | 91.97119 | 101.5259 |
| 597.9586  | 103.6484 | 102.3678 | 92.82909 | 92.16586 | 101.7955 |
| 598.92305 | 103.5987 | 102.4399 | 92.89059 | 92.21088 | 101.8444 |
| 599.8875  | 103.5553 | 102.4753 | 92.9851  | 92.09646 | 101.5883 |
| 600.85195 | 103.6368 | 102.4653 | 92.93092 | 92.0635  | 101.5679 |
| 601.8164  | 103.9629 | 102.5826 | 92.89524 | 92.21567 | 102.0087 |
| 602.78085 | 104.0444 | 102.5431 | 92.71058 | 92.18094 | 102.1384 |

|           |          |          |          |          |          |
|-----------|----------|----------|----------|----------|----------|
| 603.7453  | 103.8893 | 102.3611 | 92.60549 | 92.12112 | 101.9632 |
| 604.70975 | 103.7385 | 102.2582 | 92.69128 | 92.19134 | 101.9128 |
| 605.6742  | 103.6505 | 102.2539 | 92.61921 | 92.19439 | 101.9551 |
| 606.63865 | 103.6937 | 102.3489 | 92.70307 | 92.24359 | 102.0222 |
| 607.6031  | 103.6902 | 102.3451 | 92.76045 | 92.2821  | 102.1027 |
| 608.56755 | 103.6847 | 102.3727 | 92.71672 | 92.2982  | 102.2401 |
| 609.532   | 103.6424 | 102.3087 | 92.72598 | 92.26331 | 102.1916 |
| 610.49644 | 103.6182 | 102.4143 | 92.93782 | 92.24714 | 102.2252 |
| 611.46089 | 103.6827 | 102.5604 | 93.15847 | 92.26786 | 102.1705 |
| 612.42534 | 103.7066 | 102.5464 | 93.12786 | 92.2443  | 101.9279 |
| 613.38979 | 103.6676 | 102.3157 | 92.93884 | 92.1695  | 101.8746 |
| 614.35424 | 103.8845 | 102.3425 | 93.0615  | 92.40797 | 102.1684 |
| 615.31869 | 104.1936 | 102.5771 | 93.26459 | 92.48996 | 102.1952 |
| 616.28314 | 103.8955 | 102.2238 | 92.76885 | 92.06478 | 101.945  |
| 617.24759 | 102.9998 | 101.1693 | 91.76785 | 91.67322 | 101.7443 |
| 618.21204 | 103.2242 | 101.4026 | 92.11653 | 91.89785 | 101.9808 |
| 619.17649 | 104.0578 | 102.4476 | 93.12995 | 92.3957  | 102.3298 |
| 620.14094 | 104.0408 | 102.6046 | 93.28327 | 92.48558 | 102.2096 |
| 621.10539 | 103.8357 | 102.5551 | 93.09198 | 92.37015 | 101.9653 |
| 622.06984 | 103.5938 | 102.3906 | 92.83667 | 92.15905 | 101.782  |
| 623.03429 | 103.5623 | 102.3068 | 92.80988 | 92.11781 | 101.7398 |
| 623.99874 | 103.6741 | 102.3148 | 92.97754 | 92.09517 | 101.869  |
| 624.96318 | 103.7852 | 102.445  | 93.15569 | 92.0341  | 101.93   |
| 625.92764 | 103.6679 | 102.4453 | 92.97584 | 92.00001 | 101.9523 |
| 626.89208 | 103.6355 | 102.3092 | 92.83918 | 91.9753  | 101.9633 |
| 627.85653 | 103.692  | 102.2936 | 92.91063 | 92.05521 | 102.0969 |
| 628.82098 | 103.7998 | 102.4148 | 93.0038  | 92.2523  | 102.2891 |
| 629.78543 | 103.8378 | 102.4611 | 93.00956 | 92.36026 | 102.3044 |
| 630.74988 | 103.8038 | 102.4233 | 92.95547 | 92.3515  | 102.2123 |
| 631.71433 | 103.7186 | 102.3015 | 92.85403 | 92.27735 | 102.1073 |
| 632.67878 | 103.6561 | 102.259  | 92.78259 | 92.1986  | 101.9712 |
| 633.64323 | 103.5465 | 102.212  | 92.64751 | 92.15135 | 101.936  |
| 634.60768 | 103.5123 | 102.2642 | 92.65102 | 92.08526 | 101.9228 |
| 635.57213 | 103.4956 | 102.2476 | 92.66672 | 91.9984  | 101.8942 |
| 636.53658 | 103.4677 | 102.0064 | 92.51923 | 91.99724 | 102.0423 |
| 637.50103 | 103.381  | 101.7823 | 92.41233 | 91.93724 | 102.0041 |
| 638.46548 | 103.2564 | 101.6523 | 92.33664 | 91.84134 | 101.8928 |
| 639.42993 | 103.1256 | 101.5752 | 92.22131 | 91.78711 | 101.8807 |
| 640.39437 | 103.0613 | 101.5796 | 92.1135  | 91.76154 | 102.0034 |
| 641.35882 | 102.972  | 101.5496 | 92.03128 | 91.71155 | 102.131  |
| 642.32327 | 102.8588 | 101.4603 | 91.92216 | 91.67611 | 102.1576 |
| 643.28772 | 102.7508 | 101.2457 | 91.80631 | 91.61871 | 102.0493 |
| 644.25217 | 102.6578 | 101.0856 | 91.73792 | 91.58792 | 101.9329 |
| 645.21662 | 102.5341 | 100.936  | 91.63592 | 91.57492 | 101.9375 |
| 646.18107 | 102.341  | 100.7117 | 91.45344 | 91.48479 | 101.8907 |
| 647.14552 | 102.0869 | 100.3859 | 91.20342 | 91.35954 | 101.783  |
| 648.10997 | 101.8685 | 100.043  | 90.97251 | 91.26434 | 101.8145 |
| 649.07442 | 101.882  | 99.95813 | 90.97673 | 91.21873 | 101.9876 |
| 650.03887 | 102.2057 | 100.3041 | 91.28011 | 91.40374 | 102.1638 |
| 651.00332 | 102.2414 | 100.3789 | 91.33295 | 91.48634 | 102.1089 |
| 651.96777 | 102.0758 | 100.2441 | 91.18819 | 91.41748 | 101.9782 |
| 652.93222 | 102.0476 | 100.1236 | 91.07856 | 91.40067 | 102.0596 |
| 653.89667 | 102.1646 | 100.1586 | 91.06802 | 91.45643 | 102.2149 |
| 654.86112 | 102.1996 | 100.3145 | 91.05296 | 91.48579 | 102.2841 |

|           |          |          |          |          |          |
|-----------|----------|----------|----------|----------|----------|
| 655.82556 | 102.204  | 100.5184 | 91.11042 | 91.49667 | 102.3418 |
| 656.79001 | 102.2861 | 100.6084 | 91.19872 | 91.53406 | 102.4763 |
| 657.75446 | 102.5086 | 100.7869 | 91.4371  | 91.73243 | 102.6118 |
| 658.71891 | 102.6138 | 100.957  | 91.63377 | 91.87572 | 102.566  |
| 659.68336 | 102.6117 | 101.0281 | 91.6629  | 91.8559  | 102.3771 |
| 660.64781 | 102.6466 | 101.0366 | 91.63862 | 91.8007  | 102.3476 |
| 661.61226 | 102.6389 | 101.1668 | 91.72398 | 91.79225 | 102.3493 |
| 662.57671 | 102.5204 | 101.2576 | 91.71406 | 91.78711 | 102.2663 |
| 663.54116 | 102.7838 | 101.7296 | 91.97626 | 92.07209 | 102.3548 |
| 664.50561 | 103.3111 | 102.3241 | 92.4588  | 92.5315  | 102.8667 |
| 665.47006 | 103.8155 | 102.8245 | 92.91867 | 92.91629 | 103.5844 |
| 666.43451 | 103.4304 | 101.9923 | 92.26072 | 92.84254 | 104.0648 |
| 667.39896 | 100.2118 | 97.64207 | 88.73276 | 91.49174 | 103.956  |
| 668.36341 | 91.88918 | 86.85299 | 78.85063 | 85.34135 | 100.8866 |
| 669.32786 | 97.32252 | 93.76602 | 84.83258 | 88.07591 | 101.4268 |
| 670.29231 | 100.9631 | 98.74901 | 89.43963 | 90.60872 | 102.5028 |
| 671.25676 | 102.1332 | 100.4642 | 91.06096 | 91.46334 | 102.9325 |
| 672.2212  | 102.5253 | 100.9418 | 91.45441 | 91.77843 | 102.9982 |
| 673.18565 | 102.6817 | 101.0306 | 91.53524 | 91.92983 | 103.16   |
| 674.1501  | 102.7595 | 101.0684 | 91.63297 | 92.00387 | 103.3497 |
| 675.11455 | 102.7247 | 101.0319 | 91.59087 | 92.05247 | 103.2985 |
| 676.079   | 102.6674 | 101.0819 | 91.51386 | 92.09703 | 103.2641 |
| 677.04345 | 102.5244 | 101.0369 | 91.30543 | 92.02236 | 103.204  |
| 678.0079  | 102.3716 | 100.8126 | 91.15351 | 91.84296 | 103.0444 |
| 678.97235 | 102.2559 | 100.631  | 91.09188 | 91.69965 | 103.0493 |
| 679.9368  | 102.2136 | 100.6333 | 91.10998 | 91.70781 | 103.0927 |
| 680.90125 | 102.2481 | 100.6915 | 91.22093 | 91.75895 | 103.1537 |
| 681.8657  | 102.5002 | 100.9114 | 91.42172 | 91.8978  | 103.3706 |
| 682.83015 | 102.8191 | 101.1153 | 91.5952  | 92.09082 | 103.5504 |
| 683.7946  | 103.0081 | 101.2848 | 91.75356 | 92.26818 | 103.6222 |
| 684.75905 | 103.0545 | 101.3426 | 91.74383 | 92.34906 | 103.5775 |
| 685.72349 | 103.1685 | 101.4813 | 91.79023 | 92.37067 | 103.6171 |
| 686.68794 | 103.3496 | 101.7041 | 91.95959 | 92.40376 | 103.7265 |
| 687.65239 | 103.4248 | 101.8301 | 92.04478 | 92.35402 | 103.6445 |
| 688.61684 | 103.3556 | 101.7861 | 91.98976 | 92.26344 | 103.493  |
| 689.58129 | 103.3416 | 101.7934 | 92.02624 | 92.25048 | 103.4908 |
| 690.54574 | 103.3882 | 101.7795 | 92.08669 | 92.28842 | 103.5928 |
| 691.51019 | 103.4652 | 101.8743 | 92.28397 | 92.41521 | 103.7131 |
| 692.47464 | 103.6538 | 102.1524 | 92.55917 | 92.60154 | 103.8739 |
| 693.43909 | 103.9939 | 102.5036 | 92.86088 | 92.82582 | 104.0658 |
| 694.40354 | 104.2448 | 102.689  | 93.06965 | 92.94708 | 104.153  |
| 695.36799 | 104.3637 | 102.767  | 93.16314 | 92.95065 | 104.1085 |
| 696.33244 | 104.3803 | 102.773  | 93.20513 | 92.88478 | 103.9476 |
| 697.29689 | 104.3032 | 102.7996 | 93.21015 | 92.77462 | 103.7814 |
| 698.26134 | 104.2494 | 102.85   | 93.18885 | 92.73564 | 103.7805 |
| 699.22579 | 104.4324 | 103.0216 | 93.36081 | 92.8677  | 103.991  |
| 700.19024 | 104.6909 | 103.2812 | 93.6662  | 93.04359 | 104.1679 |
| 701.15468 | 104.8727 | 103.5263 | 93.89647 | 93.21533 | 104.2882 |
| 702.11913 | 104.9428 | 103.6154 | 93.8974  | 93.2568  | 104.2812 |
| 703.08358 | 104.9324 | 103.6109 | 93.78657 | 93.21592 | 104.2156 |
| 704.04803 | 104.882  | 103.6033 | 93.73555 | 93.212   | 104.1686 |
| 705.01248 | 104.8381 | 103.6464 | 93.79115 | 93.19522 | 104.0786 |
| 705.97693 | 104.8462 | 103.6861 | 93.83305 | 93.17958 | 104.0563 |
| 706.94138 | 104.9333 | 103.7688 | 93.9151  | 93.22225 | 104.1501 |

|           |          |          |          |          |          |
|-----------|----------|----------|----------|----------|----------|
| 707.90583 | 105.0666 | 103.8768 | 94.07701 | 93.32189 | 104.28   |
| 708.87028 | 105.2081 | 103.9882 | 94.25594 | 93.46191 | 104.4125 |
| 709.83473 | 105.2167 | 104.0278 | 94.34244 | 93.48866 | 104.38   |
| 710.79918 | 105.2781 | 104.0895 | 94.40058 | 93.51459 | 104.4269 |
| 711.76363 | 105.3292 | 104.0537 | 94.36049 | 93.52714 | 104.4917 |
| 712.72808 | 105.2732 | 103.9838 | 94.2813  | 93.46775 | 104.3927 |
| 713.69253 | 105.1688 | 103.9228 | 94.1982  | 93.38955 | 104.2366 |
| 714.65698 | 105.242  | 103.9604 | 94.23164 | 93.47256 | 104.2711 |
| 715.62143 | 105.355  | 104.0158 | 94.32894 | 93.60568 | 104.355  |
| 716.58587 | 105.4662 | 104.1102 | 94.42134 | 93.72371 | 104.4982 |
| 717.55032 | 105.4662 | 104.0787 | 94.39069 | 93.73393 | 104.5245 |
| 718.51477 | 105.2591 | 103.7992 | 94.152   | 93.57671 | 104.4242 |
| 719.47922 | 104.6908 | 103.0192 | 93.47703 | 93.20561 | 104.2678 |
| 720.44367 | 104.3391 | 102.5532 | 93.02982 | 92.94808 | 104.1828 |
| 721.40812 | 104.9818 | 103.4466 | 93.79525 | 93.29686 | 104.3711 |
| 722.37257 | 105.3124 | 103.9336 | 94.28965 | 93.50872 | 104.4036 |
| 723.33702 | 105.3148 | 103.9443 | 94.30966 | 93.52508 | 104.3551 |
| 724.30147 | 105.4582 | 104.041  | 94.38073 | 93.67229 | 104.429  |
| 725.26592 | 105.5865 | 104.1301 | 94.49476 | 93.86012 | 104.5092 |
| 726.23037 | 105.6168 | 104.1429 | 94.58721 | 93.91588 | 104.5455 |
| 727.19482 | 105.5722 | 104.0647 | 94.56433 | 93.8225  | 104.488  |
| 728.15927 | 105.4962 | 103.9764 | 94.49706 | 93.73059 | 104.4178 |
| 729.12372 | 105.4793 | 103.937  | 94.46301 | 93.6907  | 104.3812 |
| 730.08817 | 105.4454 | 103.8351 | 94.42317 | 93.61069 | 104.2795 |
| 731.05261 | 105.3241 | 103.635  | 94.33119 | 93.4811  | 104.1049 |
| 732.01706 | 105.2719 | 103.4825 | 94.29018 | 93.42219 | 104.0173 |
| 732.98151 | 105.2854 | 103.3811 | 94.28822 | 93.39613 | 104.0074 |
| 733.94596 | 105.2917 | 103.3659 | 94.32133 | 93.42714 | 104.0991 |
| 734.91041 | 105.2078 | 103.284  | 94.26594 | 93.37569 | 104.0443 |
| 735.87486 | 105.1574 | 103.2291 | 94.21406 | 93.33342 | 103.9274 |
| 736.83931 | 105.1557 | 103.2406 | 94.20076 | 93.28755 | 103.8364 |
| 737.80376 | 105.1885 | 103.2835 | 94.22575 | 93.26313 | 103.7943 |
| 738.76821 | 105.1154 | 103.2478 | 94.14142 | 93.18555 | 103.6978 |
| 739.73266 | 104.9749 | 103.1977 | 94.04762 | 93.06517 | 103.5633 |
| 740.69711 | 104.8559 | 103.0908 | 93.92069 | 92.94801 | 103.4018 |
| 741.66156 | 104.8694 | 103.0195 | 93.86095 | 92.95901 | 103.3512 |
| 742.62601 | 104.9068 | 102.9836 | 93.88762 | 92.9972  | 103.3364 |
| 743.59046 | 104.9031 | 102.9692 | 93.93959 | 93.01104 | 103.3187 |
| 744.55491 | 104.9324 | 102.9892 | 94.00084 | 93.01463 | 103.3008 |
| 745.51936 | 104.9924 | 103.0418 | 94.06497 | 93.07151 | 103.3531 |
| 746.4838  | 104.9751 | 103.0398 | 94.09751 | 93.08573 | 103.3511 |
| 747.44825 | 104.8889 | 102.9771 | 94.04797 | 93.03938 | 103.2378 |
| 748.4127  | 104.8226 | 102.9029 | 93.9812  | 92.99827 | 103.1258 |
| 749.37715 | 104.7713 | 102.8216 | 93.88663 | 92.91837 | 103.032  |
| 750.3416  | 104.7353 | 102.7842 | 93.83017 | 92.8632  | 103.0139 |
| 751.30605 | 104.7441 | 102.7969 | 93.86136 | 92.88215 | 103.0764 |
| 752.2705  | 104.8081 | 102.8543 | 93.95883 | 92.9424  | 103.1468 |
| 753.23495 | 104.9023 | 102.9749 | 94.07349 | 92.98858 | 103.2609 |
| 754.1994  | 104.9868 | 103.0929 | 94.15464 | 93.04666 | 103.3861 |
| 755.16385 | 104.9958 | 103.1424 | 94.15531 | 93.09846 | 103.4264 |
| 756.1283  | 104.9686 | 103.148  | 94.13195 | 93.11679 | 103.4422 |
| 757.09275 | 104.9654 | 103.1574 | 94.09039 | 93.08853 | 103.4578 |
| 758.0572  | 104.9625 | 103.1395 | 94.03987 | 93.07209 | 103.4618 |
| 759.02165 | 105.0181 | 103.1643 | 94.0582  | 93.09699 | 103.4905 |



|           |          |          |          |          |          |
|-----------|----------|----------|----------|----------|----------|
| 759.9861  | 105.052  | 103.2135 | 94.09202 | 93.11821 | 103.5027 |
| 760.95055 | 105.1127 | 103.3036 | 94.13881 | 93.16951 | 103.5804 |
| 761.91499 | 105.16   | 103.3284 | 94.17795 | 93.18586 | 103.6552 |
| 762.87944 | 105.2175 | 103.3565 | 94.21753 | 93.20044 | 103.753  |
| 763.84389 | 105.2099 | 103.3527 | 94.20369 | 93.20871 | 103.8062 |
| 764.80834 | 105.1297 | 103.2889 | 94.15092 | 93.18924 | 103.7814 |
| 765.77279 | 105.0847 | 103.2134 | 94.10026 | 93.15099 | 103.7187 |
| 766.73724 | 105.1064 | 103.1879 | 94.10723 | 93.16513 | 103.695  |
| 767.70169 | 105.1058 | 103.1383 | 94.12593 | 93.17367 | 103.6575 |
| 768.66614 | 105.1403 | 103.1137 | 94.15068 | 93.21793 | 103.6195 |
| 769.63059 | 105.1323 | 102.9985 | 94.10667 | 93.15783 | 103.4743 |
| 770.59504 | 105.1075 | 102.8636 | 94.07625 | 93.06571 | 103.3315 |
| 771.55949 | 105.0759 | 102.7423 | 94.07297 | 93.02325 | 103.198  |
| 772.52394 | 104.9682 | 102.6274 | 94.02757 | 92.96416 | 103.0603 |
| 773.48839 | 104.8719 | 102.5319 | 93.95949 | 92.86056 | 102.9624 |
| 774.45284 | 104.8782 | 102.5102 | 93.93965 | 92.79312 | 102.929  |
| 775.41728 | 104.9374 | 102.5299 | 93.93717 | 92.767   | 102.9491 |
| 776.38174 | 104.9285 | 102.5119 | 93.897   | 92.71731 | 102.9439 |
| 777.34618 | 104.8946 | 102.5319 | 93.86975 | 92.7362  | 102.9818 |
| 778.31063 | 104.9278 | 102.6117 | 93.90068 | 92.8015  | 103.1099 |
| 779.27508 | 105.0545 | 102.7409 | 94.01968 | 92.90581 | 103.3052 |
| 780.23953 | 105.1678 | 102.9118 | 94.13777 | 93.02817 | 103.5064 |
| 781.20398 | 105.2304 | 103.0692 | 94.24056 | 93.1435  | 103.6986 |
| 782.16843 | 105.3042 | 103.2135 | 94.31955 | 93.26213 | 103.9124 |
| 783.13288 | 105.4148 | 103.3962 | 94.39969 | 93.35833 | 104.1641 |
| 784.09733 | 105.4858 | 103.584  | 94.47995 | 93.44697 | 104.439  |
| 785.06178 | 105.5325 | 103.7665 | 94.55968 | 93.56164 | 104.6889 |
| 786.02623 | 105.5573 | 103.8941 | 94.60243 | 93.65193 | 104.8282 |
| 786.99068 | 105.5628 | 103.9435 | 94.58941 | 93.65304 | 104.8722 |
| 787.95513 | 105.6112 | 104.0477 | 94.61644 | 93.68003 | 104.9808 |
| 788.91958 | 105.6535 | 104.1886 | 94.69552 | 93.7604  | 105.078  |
| 789.88403 | 105.7474 | 104.3904 | 94.82829 | 93.90836 | 105.2372 |
| 790.84848 | 105.8271 | 104.5121 | 94.88281 | 94.00614 | 105.3735 |
| 791.81292 | 105.9159 | 104.5822 | 94.94488 | 94.09593 | 105.501  |
| 792.77737 | 105.9712 | 104.6659 | 94.99546 | 94.12238 | 105.5995 |
| 793.74182 | 105.9889 | 104.7508 | 95.01714 | 94.12673 | 105.7021 |
| 794.70627 | 105.9576 | 104.753  | 94.96598 | 94.09148 | 105.7485 |
| 795.67072 | 105.9488 | 104.7661 | 94.95504 | 94.07999 | 105.7832 |
| 796.63517 | 105.908  | 104.7387 | 94.90501 | 94.06262 | 105.7789 |
| 797.59962 | 105.9184 | 104.7963 | 94.94559 | 94.10643 | 105.8047 |
| 798.56407 | 106.013  | 104.9456 | 95.08156 | 94.23102 | 105.9014 |
| 799.52852 | 106.1092 | 105.0424 | 95.20777 | 94.3686  | 106.0373 |
| 800.49297 | 106.1291 | 105.0487 | 95.24789 | 94.43625 | 106.103  |
| 801.45742 | 106.0551 | 105.0179 | 95.21404 | 94.3998  | 106.0864 |
| 802.42187 | 106.0201 | 105.0414 | 95.21469 | 94.38927 | 106.0943 |
| 803.38632 | 105.9736 | 105.0226 | 95.17808 | 94.33518 | 106.0715 |
| 804.35077 | 105.9416 | 104.9745 | 95.10702 | 94.28328 | 106.049  |
| 805.31522 | 105.937  | 104.9652 | 95.06915 | 94.28774 | 106.0272 |
| 806.27967 | 105.9034 | 104.9883 | 95.06842 | 94.28041 | 105.9948 |
| 807.24411 | 105.8683 | 104.9977 | 95.05764 | 94.27423 | 105.9858 |
| 808.20856 | 105.9153 | 105.0037 | 95.06331 | 94.31088 | 106.0132 |
| 809.17301 | 105.9701 | 105.0052 | 95.08368 | 94.35417 | 106.049  |
| 810.13746 | 106.007  | 105.0316 | 95.13596 | 94.42329 | 106.0785 |
| 811.10191 | 105.9783 | 105.0309 | 95.14629 | 94.4581  | 106.0809 |

|           |          |          |          |          |          |
|-----------|----------|----------|----------|----------|----------|
| 812.06636 | 105.9683 | 105.0135 | 95.12841 | 94.45376 | 106.0993 |
| 813.03081 | 106.0309 | 105.0555 | 95.16431 | 94.48862 | 106.1694 |
| 813.99526 | 106.0434 | 105.0633 | 95.18327 | 94.48613 | 106.1654 |
| 814.95971 | 106.051  | 105.0996 | 95.22661 | 94.52661 | 106.1675 |
| 815.92416 | 106.0244 | 105.1331 | 95.23597 | 94.54207 | 106.1567 |
| 816.88861 | 106.0605 | 105.1475 | 95.27348 | 94.54731 | 106.199  |
| 817.85306 | 106.0572 | 105.1197 | 95.271   | 94.51971 | 106.1663 |
| 818.81751 | 105.991  | 105.0906 | 95.22383 | 94.47464 | 106.0952 |
| 819.78196 | 105.952  | 105.1109 | 95.20988 | 94.47368 | 106.0677 |
| 820.7464  | 105.9814 | 105.1345 | 95.24994 | 94.51974 | 106.0961 |
| 821.71086 | 105.9877 | 105.099  | 95.23179 | 94.53206 | 106.0665 |
| 822.6753  | 105.978  | 105.1146 | 95.25438 | 94.56264 | 106.084  |
| 823.63975 | 105.9371 | 105.1248 | 95.28079 | 94.57345 | 106.1071 |
| 824.6042  | 105.9248 | 105.0999 | 95.25421 | 94.57801 | 106.1026 |
| 825.56865 | 105.9539 | 105.0975 | 95.25566 | 94.60147 | 106.0918 |
| 826.5331  | 105.9408 | 105.0973 | 95.28985 | 94.58983 | 106.0671 |
| 827.49755 | 105.9085 | 105.0972 | 95.2729  | 94.56317 | 106.0298 |
| 828.462   | 105.9194 | 105.132  | 95.28901 | 94.59233 | 106.0522 |
| 829.42645 | 106.0036 | 105.1978 | 95.35076 | 94.66718 | 106.1517 |
| 830.3909  | 106.0133 | 105.16   | 95.34868 | 94.68016 | 106.1746 |
| 831.35535 | 105.9537 | 105.1086 | 95.34506 | 94.65574 | 106.1219 |
| 832.3198  | 105.8844 | 105.1059 | 95.36071 | 94.62202 | 106.1142 |
| 833.28425 | 105.8855 | 105.1105 | 95.36762 | 94.59445 | 106.1639 |
| 834.2487  | 105.9278 | 105.1222 | 95.34897 | 94.60727 | 106.2039 |
| 835.21315 | 105.8882 | 105.1139 | 95.31213 | 94.60809 | 106.2049 |
| 836.1776  | 105.8267 | 105.0761 | 95.30021 | 94.58698 | 106.1663 |
| 837.14204 | 105.8076 | 105.083  | 95.31127 | 94.6028  | 106.1599 |
| 838.10649 | 105.8528 | 105.1513 | 95.36271 | 94.64476 | 106.2218 |
| 839.07094 | 105.8577 | 105.1569 | 95.39483 | 94.64012 | 106.2062 |
| 840.03539 | 105.7897 | 105.1426 | 95.36505 | 94.62477 | 106.1347 |
| 840.99984 | 105.7386 | 105.1312 | 95.33287 | 94.60981 | 106.1065 |
| 841.96429 | 105.7596 | 105.1453 | 95.35996 | 94.63391 | 106.1785 |
| 842.92874 | 105.7498 | 105.1074 | 95.34964 | 94.60942 | 106.1991 |
| 843.89319 | 105.7192 | 105.0653 | 95.32726 | 94.56757 | 106.196  |
| 844.85764 | 105.7018 | 105.053  | 95.3325  | 94.54313 | 106.2228 |
| 845.82209 | 105.7085 | 105.0553 | 95.36359 | 94.55027 | 106.2952 |
| 846.78654 | 105.7615 | 105.088  | 95.39267 | 94.59991 | 106.3884 |
| 847.75099 | 105.7956 | 105.0879 | 95.40548 | 94.64216 | 106.4182 |
| 848.71544 | 105.7189 | 105.0123 | 95.37406 | 94.58671 | 106.3599 |
| 849.67989 | 105.6645 | 104.9663 | 95.34256 | 94.52186 | 106.321  |
| 850.64434 | 105.6865 | 104.9518 | 95.35308 | 94.51754 | 106.3378 |
| 851.60879 | 105.7303 | 104.9532 | 95.39054 | 94.53804 | 106.3664 |
| 852.57323 | 105.7336 | 104.939  | 95.40834 | 94.52683 | 106.3171 |
| 853.53768 | 105.7507 | 104.935  | 95.42217 | 94.53235 | 106.3021 |
| 854.50213 | 105.7534 | 104.907  | 95.41444 | 94.52177 | 106.3314 |
| 855.46658 | 105.7374 | 104.8614 | 95.37881 | 94.50712 | 106.3533 |
| 856.43103 | 105.6839 | 104.8166 | 95.34103 | 94.47102 | 106.3228 |
| 857.39548 | 105.6094 | 104.7449 | 95.28916 | 94.42439 | 106.2586 |
| 858.35993 | 105.5602 | 104.6751 | 95.24544 | 94.37094 | 106.2248 |
| 859.32438 | 105.5704 | 104.6539 | 95.23564 | 94.34745 | 106.2343 |
| 860.28883 | 105.5723 | 104.6329 | 95.21284 | 94.31417 | 106.1891 |
| 861.25328 | 105.5057 | 104.566  | 95.1786  | 94.2425  | 106.0889 |
| 862.21773 | 105.4259 | 104.448  | 95.12322 | 94.17295 | 105.9834 |
| 863.18218 | 105.4118 | 104.3679 | 95.07922 | 94.12588 | 105.9549 |

|           |          |          |          |          |          |
|-----------|----------|----------|----------|----------|----------|
| 864.14663 | 105.4233 | 104.3195 | 95.044   | 94.08801 | 105.9388 |
| 865.11108 | 105.3675 | 104.2337 | 94.98242 | 94.03622 | 105.8599 |
| 866.07552 | 105.3023 | 104.1447 | 94.92935 | 93.96882 | 105.7718 |
| 867.03998 | 105.3065 | 104.1054 | 94.92617 | 93.94499 | 105.7923 |
| 868.00442 | 105.3188 | 104.0728 | 94.91606 | 93.94277 | 105.8121 |
| 868.96887 | 105.3094 | 104.0419 | 94.90055 | 93.95441 | 105.7747 |
| 869.93332 | 105.2454 | 104.0001 | 94.85741 | 93.92486 | 105.7004 |
| 870.89777 | 105.1947 | 103.9646 | 94.80812 | 93.8723  | 105.6789 |
| 871.86222 | 105.1687 | 103.9385 | 94.7984  | 93.8136  | 105.6723 |
| 872.82667 | 105.1329 | 103.921  | 94.80599 | 93.78646 | 105.6643 |
| 873.79112 | 105.0716 | 103.8879 | 94.80244 | 93.78235 | 105.6348 |
| 874.75557 | 105.0042 | 103.8536 | 94.76642 | 93.78571 | 105.6224 |
| 875.72002 | 104.9642 | 103.8281 | 94.7168  | 93.75263 | 105.6358 |
| 876.68447 | 104.9352 | 103.8053 | 94.67512 | 93.71675 | 105.6484 |
| 877.64892 | 104.8851 | 103.7711 | 94.63563 | 93.6907  | 105.601  |
| 878.61337 | 104.7992 | 103.6826 | 94.56867 | 93.66192 | 105.5401 |
| 879.57782 | 104.7257 | 103.6147 | 94.5106  | 93.62204 | 105.4995 |
| 880.54227 | 104.7214 | 103.6328 | 94.53355 | 93.60399 | 105.4956 |
| 881.50671 | 104.6587 | 103.5958 | 94.52652 | 93.56096 | 105.4696 |
| 882.47116 | 104.5502 | 103.5216 | 94.4697  | 93.52124 | 105.3913 |
| 883.43561 | 104.4865 | 103.4729 | 94.43798 | 93.49474 | 105.3308 |
| 884.40006 | 104.5024 | 103.4614 | 94.45663 | 93.49158 | 105.3491 |
| 885.36451 | 104.4516 | 103.3982 | 94.41606 | 93.45434 | 105.3007 |
| 886.32896 | 104.3278 | 103.2976 | 94.32609 | 93.38493 | 105.1878 |
| 887.29341 | 104.1827 | 103.1493 | 94.20917 | 93.27068 | 105.047  |
| 888.25786 | 104.1089 | 103.0585 | 94.13524 | 93.19063 | 104.9886 |
| 889.22231 | 104.0463 | 102.9811 | 94.07944 | 93.12533 | 104.9365 |
| 890.18676 | 103.9407 | 102.8731 | 94.03112 | 93.07032 | 104.8519 |
| 891.15121 | 103.7782 | 102.7214 | 93.93179 | 92.97356 | 104.7457 |
| 892.11566 | 103.6619 | 102.631  | 93.86971 | 92.89449 | 104.6992 |
| 893.08011 | 103.5892 | 102.5794 | 93.8498  | 92.85972 | 104.7008 |
| 894.04456 | 103.5057 | 102.5307 | 93.81495 | 92.81284 | 104.6758 |
| 895.00901 | 103.3678 | 102.4575 | 93.74315 | 92.73023 | 104.5967 |
| 895.97345 | 103.1808 | 102.3195 | 93.6402  | 92.62466 | 104.5074 |
| 896.93791 | 103.0422 | 102.1954 | 93.552   | 92.5233  | 104.4436 |
| 897.90235 | 102.9722 | 102.1271 | 93.50857 | 92.45697 | 104.4119 |
| 898.8668  | 102.8998 | 102.0722 | 93.47898 | 92.41101 | 104.3672 |
| 899.83125 | 102.7699 | 101.9924 | 93.40925 | 92.35453 | 104.3184 |
| 900.7957  | 102.6323 | 101.9115 | 93.33312 | 92.28981 | 104.2877 |
| 901.76015 | 102.4698 | 101.8233 | 93.26011 | 92.20678 | 104.2371 |
| 902.7246  | 102.2598 | 101.7036 | 93.17051 | 92.10953 | 104.1504 |
| 903.68905 | 102.1006 | 101.6015 | 93.10772 | 92.02881 | 104.0836 |
| 904.6535  | 101.9944 | 101.4843 | 93.04899 | 91.93167 | 104.0256 |
| 905.61795 | 101.866  | 101.3469 | 92.97199 | 91.8401  | 103.9739 |
| 906.5824  | 101.6765 | 101.1758 | 92.85938 | 91.73559 | 103.8984 |
| 907.54685 | 101.4878 | 101.0082 | 92.76543 | 91.64723 | 103.8029 |
| 908.5113  | 101.2716 | 100.857  | 92.67515 | 91.53198 | 103.6977 |
| 909.47575 | 101.0559 | 100.7286 | 92.57488 | 91.40071 | 103.6032 |
| 910.4402  | 100.8289 | 100.5834 | 92.45189 | 91.25904 | 103.4858 |
| 911.40464 | 100.5833 | 100.4474 | 92.34114 | 91.13434 | 103.3862 |
| 912.3691  | 100.3116 | 100.3125 | 92.19549 | 90.9865  | 103.2664 |
| 913.33354 | 100.0841 | 100.1794 | 92.05627 | 90.8292  | 103.1425 |
| 914.29799 | 99.92031 | 100.0344 | 91.94692 | 90.68734 | 103.0196 |
| 915.26244 | 99.79571 | 99.91081 | 91.86633 | 90.57576 | 102.8914 |

|           |          |          |          |          |          |
|-----------|----------|----------|----------|----------|----------|
| 916.22689 | 99.66894 | 99.80034 | 91.79518 | 90.47621 | 102.756  |
| 917.19134 | 99.5355  | 99.70274 | 91.74132 | 90.38563 | 102.6594 |
| 918.15579 | 99.41458 | 99.60195 | 91.66657 | 90.30383 | 102.5772 |
| 919.12024 | 99.30805 | 99.49703 | 91.59265 | 90.22875 | 102.4823 |
| 920.08469 | 99.21552 | 99.3814  | 91.54602 | 90.16817 | 102.3494 |
| 921.04914 | 99.11679 | 99.28018 | 91.50681 | 90.10238 | 102.2352 |
| 922.01359 | 99.12342 | 99.23972 | 91.49109 | 90.06516 | 102.1505 |
| 922.97804 | 99.1836  | 99.22025 | 91.51625 | 90.06653 | 102.1143 |
| 923.94249 | 99.18283 | 99.16437 | 91.53636 | 90.03571 | 102.0514 |
| 924.90694 | 99.25503 | 99.15308 | 91.59955 | 90.0453  | 101.9759 |
| 925.87139 | 99.44522 | 99.20264 | 91.68556 | 90.09494 | 101.9477 |
| 926.83583 | 99.71712 | 99.27167 | 91.76572 | 90.16673 | 101.9494 |
| 927.80028 | 99.93426 | 99.31328 | 91.84185 | 90.2342  | 101.9064 |
| 928.76473 | 99.99226 | 99.27486 | 91.87104 | 90.24526 | 101.8095 |
| 929.72918 | 99.95131 | 99.18052 | 91.82554 | 90.17217 | 101.6858 |
| 930.69363 | 99.85501 | 99.05455 | 91.72256 | 90.04909 | 101.5686 |
| 931.65808 | 99.78723 | 98.90827 | 91.63271 | 89.93551 | 101.4119 |
| 932.62253 | 99.9754  | 98.8651  | 91.67842 | 89.94888 | 101.2533 |
| 933.58698 | 100.1659 | 98.83733 | 91.74729 | 89.96682 | 101.1256 |
| 934.55143 | 100.2675 | 98.77802 | 91.75235 | 89.90997 | 101.0115 |
| 935.51588 | 100.369  | 98.71704 | 91.71627 | 89.83843 | 100.9042 |
| 936.48033 | 100.4537 | 98.62794 | 91.69914 | 89.80484 | 100.7693 |
| 937.44478 | 100.497  | 98.54877 | 91.70968 | 89.78602 | 100.6342 |
| 938.40923 | 100.646  | 98.54379 | 91.74868 | 89.80737 | 100.5894 |
| 939.37368 | 100.8847 | 98.54588 | 91.77118 | 89.83071 | 100.5251 |
| 940.33813 | 101.126  | 98.53539 | 91.81471 | 89.84679 | 100.451  |
| 941.30258 | 101.3002 | 98.5223  | 91.86726 | 89.85875 | 100.3737 |
| 942.26702 | 101.4125 | 98.49025 | 91.91029 | 89.86285 | 100.3001 |
| 943.23147 | 101.5571 | 98.45068 | 91.94625 | 89.84551 | 100.2535 |
| 944.19592 | 101.6811 | 98.40215 | 91.9486  | 89.82105 | 100.2127 |
| 945.16037 | 101.7881 | 98.34516 | 91.94599 | 89.81639 | 100.1399 |
| 946.12482 | 101.9257 | 98.35379 | 92.0064  | 89.86891 | 100.1044 |
| 947.08927 | 102.0276 | 98.35018 | 92.03491 | 89.85932 | 100.1416 |
| 948.05372 | 102.1375 | 98.33334 | 92.03389 | 89.84856 | 100.1893 |
| 949.01817 | 102.2389 | 98.29458 | 92.05563 | 89.88159 | 100.1646 |
| 949.98262 | 102.3135 | 98.26458 | 92.11637 | 89.89765 | 100.1306 |
| 950.94707 | 102.373  | 98.29086 | 92.18712 | 89.90655 | 100.1204 |
| 951.91152 | 102.4473 | 98.31099 | 92.25167 | 89.94699 | 100.154  |
| 952.87597 | 102.5368 | 98.31334 | 92.29187 | 89.99705 | 100.2024 |
| 953.84042 | 102.5887 | 98.31074 | 92.32513 | 90.03266 | 100.2052 |
| 954.80487 | 102.6344 | 98.32522 | 92.38578 | 90.08531 | 100.2329 |
| 955.76932 | 102.7572 | 98.40203 | 92.4922  | 90.19032 | 100.3899 |
| 956.73376 | 102.8797 | 98.47839 | 92.55662 | 90.24227 | 100.5123 |
| 957.69821 | 102.9055 | 98.50723 | 92.57941 | 90.24973 | 100.52   |
| 958.66266 | 102.8906 | 98.50104 | 92.62211 | 90.27199 | 100.551  |
| 959.62711 | 102.9387 | 98.5624  | 92.70607 | 90.33426 | 100.6719 |
| 960.59156 | 102.9999 | 98.61472 | 92.75936 | 90.35583 | 100.7247 |
| 961.55601 | 103.0772 | 98.64361 | 92.76519 | 90.39934 | 100.7179 |
| 962.52046 | 103.1103 | 98.67045 | 92.7411  | 90.45655 | 100.7118 |
| 963.48491 | 103.1114 | 98.71695 | 92.73832 | 90.48479 | 100.686  |
| 964.44936 | 103.1435 | 98.77479 | 92.73855 | 90.50465 | 100.6628 |
| 965.41381 | 103.1861 | 98.83366 | 92.74387 | 90.52075 | 100.6579 |
| 966.37826 | 103.2131 | 98.84461 | 92.75375 | 90.51513 | 100.616  |
| 967.34271 | 103.2174 | 98.86727 | 92.77948 | 90.53257 | 100.5798 |

|            |          |          |          |          |          |
|------------|----------|----------|----------|----------|----------|
| 968.30716  | 103.2471 | 98.94182 | 92.81499 | 90.56771 | 100.5684 |
| 969.27161  | 103.3258 | 98.98474 | 92.8162  | 90.58688 | 100.5413 |
| 970.23606  | 103.3552 | 98.95625 | 92.78992 | 90.58404 | 100.4557 |
| 971.20051  | 103.3617 | 98.94069 | 92.7756  | 90.59934 | 100.4045 |
| 972.16495  | 103.4042 | 98.95202 | 92.76651 | 90.61522 | 100.4319 |
| 973.1294   | 103.4613 | 99.00212 | 92.79352 | 90.64712 | 100.471  |
| 974.09385  | 103.5279 | 99.0581  | 92.85716 | 90.6996  | 100.4586 |
| 975.0583   | 103.5795 | 99.09043 | 92.93088 | 90.7394  | 100.4809 |
| 976.02275  | 103.6155 | 99.1127  | 92.98569 | 90.77207 | 100.5413 |
| 976.9872   | 103.684  | 99.17913 | 93.02103 | 90.82771 | 100.6094 |
| 977.95165  | 103.7708 | 99.25972 | 93.05406 | 90.87811 | 100.6855 |
| 978.9161   | 103.8253 | 99.2853  | 93.07595 | 90.9493  | 100.7268 |
| 979.88055  | 103.8279 | 99.29197 | 93.06549 | 90.9702  | 100.7084 |
| 980.845    | 103.8627 | 99.32695 | 93.07551 | 90.9696  | 100.7288 |
| 981.80945  | 103.9545 | 99.35535 | 93.11452 | 91.0115  | 100.8152 |
| 982.7739   | 104.0416 | 99.39871 | 93.14349 | 91.08624 | 100.8903 |
| 983.73835  | 104.0322 | 99.36519 | 93.12033 | 91.09467 | 100.8464 |
| 984.7028   | 103.9899 | 99.27495 | 93.07405 | 91.03814 | 100.7955 |
| 985.66725  | 103.9993 | 99.23334 | 93.06387 | 91.00984 | 100.7785 |
| 986.6317   | 104.0824 | 99.28081 | 93.11888 | 91.07724 | 100.7909 |
| 987.59614  | 104.0768 | 99.24547 | 93.10983 | 91.08598 | 100.7544 |
| 988.56059  | 104.0004 | 99.15676 | 93.05854 | 91.06071 | 100.6917 |
| 989.52504  | 103.9612 | 99.13853 | 93.00152 | 91.02726 | 100.6368 |
| 990.48949  | 104.0122 | 99.15167 | 93.00498 | 90.98389 | 100.642  |
| 991.45394  | 104.0408 | 99.09226 | 93.00611 | 90.92309 | 100.6068 |
| 992.41839  | 104.0185 | 99.01155 | 92.98568 | 90.88634 | 100.5385 |
| 993.38284  | 103.9749 | 98.94869 | 92.94569 | 90.88263 | 100.4772 |
| 994.34729  | 103.9221 | 98.87654 | 92.93108 | 90.85048 | 100.4067 |
| 995.31174  | 103.8582 | 98.74767 | 92.8453  | 90.73156 | 100.2792 |
| 996.27619  | 103.8303 | 98.64246 | 92.78686 | 90.6842  | 100.1666 |
| 997.24064  | 103.821  | 98.5684  | 92.7618  | 90.66311 | 100.086  |
| 998.20509  | 103.8243 | 98.52843 | 92.73217 | 90.65502 | 100.0343 |
| 999.16954  | 103.8569 | 98.50169 | 92.71098 | 90.63708 | 99.97029 |
| 1000.13399 | 103.8491 | 98.42239 | 92.68057 | 90.57425 | 99.84125 |
| 1001.09844 | 103.8631 | 98.34008 | 92.65832 | 90.57495 | 99.74243 |
| 1002.06289 | 103.831  | 98.25191 | 92.5998  | 90.55025 | 99.63948 |
| 1003.02733 | 103.7826 | 98.19251 | 92.54165 | 90.52366 | 99.52961 |
| 1003.99178 | 103.7603 | 98.13663 | 92.49734 | 90.50892 | 99.41756 |
| 1004.95623 | 103.7257 | 98.05093 | 92.45339 | 90.45338 | 99.27641 |
| 1005.92068 | 103.7036 | 97.95639 | 92.42633 | 90.36149 | 99.1832  |
| 1006.88513 | 103.6795 | 97.85951 | 92.38849 | 90.27062 | 99.10161 |
| 1007.84958 | 103.66   | 97.78298 | 92.36898 | 90.20998 | 99.02222 |
| 1008.81403 | 103.5914 | 97.63151 | 92.30682 | 90.11578 | 98.87406 |
| 1009.77848 | 103.5368 | 97.50073 | 92.22518 | 90.10702 | 98.7719  |
| 1010.74293 | 103.4076 | 97.31323 | 92.08799 | 90.00312 | 98.63315 |
| 1011.70738 | 103.3375 | 97.18001 | 92.03957 | 89.88142 | 98.54347 |
| 1012.67183 | 103.2987 | 97.07607 | 91.99723 | 89.83512 | 98.48581 |
| 1013.63628 | 103.2342 | 96.94916 | 91.93728 | 89.80006 | 98.42675 |
| 1014.60073 | 103.1082 | 96.7783  | 91.82674 | 89.64171 | 98.31967 |
| 1015.56518 | 103.015  | 96.61644 | 91.70412 | 89.50197 | 98.23183 |
| 1016.52963 | 102.9547 | 96.49588 | 91.62382 | 89.44725 | 98.1342  |
| 1017.49408 | 102.8804 | 96.36248 | 91.55677 | 89.37569 | 98.00478 |
| 1018.45852 | 102.7761 | 96.18745 | 91.48826 | 89.25791 | 97.87606 |
| 1019.42297 | 102.6271 | 95.98703 | 91.4028  | 89.14647 | 97.70149 |

|            |          |          |          |          |          |
|------------|----------|----------|----------|----------|----------|
| 1020.38742 | 102.5448 | 95.8304  | 91.32824 | 89.03624 | 97.52671 |
| 1021.35187 | 102.4182 | 95.61278 | 91.20961 | 88.87205 | 97.31597 |
| 1022.31632 | 102.2438 | 95.35873 | 91.06033 | 88.6948  | 97.03705 |
| 1023.28077 | 102.0281 | 95.05089 | 90.87177 | 88.45839 | 96.69131 |
| 1024.24522 | 101.825  | 94.69553 | 90.65047 | 88.22507 | 96.35158 |
| 1025.20967 | 101.5913 | 94.28016 | 90.40929 | 87.98124 | 95.97735 |
| 1026.17412 | 101.3136 | 93.80631 | 90.15209 | 87.70924 | 95.53614 |
| 1027.13857 | 101.0355 | 93.29881 | 89.88559 | 87.41283 | 95.10228 |
| 1028.10302 | 100.7734 | 92.90247 | 89.65153 | 87.09369 | 94.67757 |
| 1029.06747 | 100.588  | 92.65359 | 89.50691 | 86.85169 | 94.29455 |
| 1030.03192 | 100.3445 | 92.30915 | 89.32423 | 86.5992  | 93.87364 |
| 1030.99637 | 100.0789 | 91.92982 | 89.12597 | 86.37557 | 93.50063 |
| 1031.96081 | 99.80586 | 91.53925 | 88.89821 | 86.12281 | 93.11807 |
| 1032.92527 | 99.57074 | 91.17776 | 88.70365 | 85.88681 | 92.7683  |
| 1033.88971 | 99.34605 | 90.83451 | 88.53361 | 85.67518 | 92.44557 |
| 1034.85416 | 99.10747 | 90.53773 | 88.37336 | 85.4971  | 92.16171 |
| 1035.81861 | 98.89066 | 90.25797 | 88.18879 | 85.32431 | 91.90628 |
| 1036.78306 | 98.76728 | 90.01277 | 88.03794 | 85.201   | 91.73166 |
| 1037.74751 | 98.70432 | 89.85056 | 87.93805 | 85.12074 | 91.60471 |
| 1038.71196 | 98.68927 | 89.79435 | 87.91292 | 85.09544 | 91.54004 |
| 1039.67641 | 98.66892 | 89.73644 | 87.89231 | 85.06996 | 91.48888 |
| 1040.64086 | 98.63431 | 89.66206 | 87.85518 | 85.03885 | 91.41886 |
| 1041.60531 | 98.66295 | 89.62184 | 87.83706 | 85.04568 | 91.35536 |
| 1042.56976 | 98.70593 | 89.58778 | 87.84748 | 85.058   | 91.27899 |
| 1043.53421 | 98.71952 | 89.56129 | 87.86036 | 85.06253 | 91.21201 |
| 1044.49866 | 98.71249 | 89.53872 | 87.85266 | 85.07418 | 91.15773 |
| 1045.46311 | 98.6953  | 89.51641 | 87.84275 | 85.08167 | 91.0951  |
| 1046.42756 | 98.64097 | 89.5011  | 87.84153 | 85.10095 | 91.01083 |
| 1047.392   | 98.59944 | 89.5261  | 87.85242 | 85.1401  | 90.95416 |
| 1048.35645 | 98.60944 | 89.62859 | 87.8991  | 85.21346 | 90.99538 |
| 1049.3209  | 98.58265 | 89.71566 | 87.95757 | 85.25969 | 91.04749 |
| 1050.28535 | 98.53084 | 89.77694 | 87.99846 | 85.31223 | 91.11143 |
| 1051.2498  | 98.4497  | 89.8262  | 87.99433 | 85.36359 | 91.19279 |
| 1052.21425 | 98.3463  | 89.90262 | 87.99539 | 85.3934  | 91.31697 |
| 1053.1787  | 98.23062 | 89.9746  | 88.00119 | 85.38162 | 91.47005 |
| 1054.14315 | 98.07314 | 89.96495 | 87.94423 | 85.32844 | 91.59539 |
| 1055.1076  | 97.85325 | 89.86602 | 87.84685 | 85.25695 | 91.67765 |
| 1056.07205 | 97.58653 | 89.73928 | 87.76609 | 85.1889  | 91.77728 |
| 1057.0365  | 97.23628 | 89.49856 | 87.58821 | 85.00815 | 91.80304 |
| 1058.00095 | 96.83287 | 89.24705 | 87.34908 | 84.76436 | 91.79054 |
| 1058.9654  | 96.36545 | 89.02167 | 87.10761 | 84.49282 | 91.70858 |
| 1059.92985 | 95.85909 | 88.75745 | 86.88076 | 84.19032 | 91.59492 |
| 1060.8943  | 95.30814 | 88.44026 | 86.63176 | 83.85514 | 91.48005 |
| 1061.85875 | 94.74263 | 88.12937 | 86.37728 | 83.5486  | 91.37537 |
| 1062.82319 | 94.13062 | 87.75777 | 86.09519 | 83.23567 | 91.22511 |
| 1063.78764 | 93.50374 | 87.38505 | 85.82321 | 82.94791 | 91.08987 |
| 1064.75209 | 92.85159 | 87.03026 | 85.52499 | 82.66956 | 90.97646 |
| 1065.71654 | 92.19549 | 86.67755 | 85.20621 | 82.38262 | 90.86907 |
| 1066.68099 | 91.59673 | 86.45436 | 84.96905 | 82.12555 | 90.79817 |
| 1067.64544 | 91.07313 | 86.37048 | 84.81351 | 81.93753 | 90.75808 |
| 1068.60989 | 90.566   | 86.27397 | 84.62715 | 81.73741 | 90.70352 |
| 1069.57434 | 90.03661 | 86.11584 | 84.3813  | 81.4809  | 90.67461 |
| 1070.53879 | 89.50033 | 85.91232 | 84.11899 | 81.22362 | 90.6321  |
| 1071.50324 | 88.99585 | 85.69013 | 83.83752 | 80.98732 | 90.57244 |

|            |          |          |          |          |          |
|------------|----------|----------|----------|----------|----------|
| 1072.46769 | 88.56108 | 85.46345 | 83.57412 | 80.74165 | 90.49837 |
| 1073.43214 | 88.26075 | 85.30784 | 83.4187  | 80.55956 | 90.47305 |
| 1074.39659 | 88.03314 | 85.18674 | 83.28624 | 80.38945 | 90.44027 |
| 1075.36104 | 87.83468 | 85.10716 | 83.14925 | 80.24511 | 90.4068  |
| 1076.32549 | 87.67601 | 85.03969 | 83.05193 | 80.13514 | 90.3925  |
| 1077.28994 | 87.58614 | 85.03816 | 83.02177 | 80.08411 | 90.47081 |
| 1078.25438 | 87.53832 | 85.12989 | 83.02641 | 80.10364 | 90.63407 |
| 1079.21883 | 87.61918 | 85.34614 | 83.10705 | 80.22511 | 90.90629 |
| 1080.18328 | 87.77686 | 85.62034 | 83.26323 | 80.40504 | 91.24964 |
| 1081.14773 | 87.92518 | 85.95355 | 83.46683 | 80.6345  | 91.69127 |
| 1082.11218 | 88.10236 | 86.3624  | 83.7007  | 80.8979  | 92.22076 |
| 1083.07663 | 88.3803  | 86.84919 | 83.96774 | 81.22641 | 92.79509 |
| 1084.04108 | 88.65274 | 87.30462 | 84.20589 | 81.57304 | 93.35264 |
| 1085.00553 | 89.13478 | 87.87001 | 84.56129 | 82.03454 | 93.9935  |
| 1085.96998 | 89.89224 | 88.58773 | 85.06598 | 82.61021 | 94.68528 |
| 1086.93443 | 90.41435 | 89.20266 | 85.48099 | 83.09001 | 95.34341 |
| 1087.89888 | 90.78965 | 89.71255 | 85.80119 | 83.47414 | 95.9368  |
| 1088.86333 | 91.27438 | 90.22905 | 86.15994 | 83.90648 | 96.49168 |
| 1089.82778 | 91.70403 | 90.73125 | 86.50383 | 84.29538 | 97.01394 |
| 1090.79223 | 92.20099 | 91.30172 | 86.87587 | 84.71112 | 97.57311 |
| 1091.75668 | 92.62107 | 91.79907 | 87.19404 | 85.08082 | 98.1043  |
| 1092.72113 | 92.9347  | 92.1906  | 87.45381 | 85.38439 | 98.54392 |
| 1093.68557 | 93.30111 | 92.53574 | 87.72323 | 85.69111 | 98.91902 |
| 1094.65002 | 93.60028 | 92.80239 | 87.92937 | 85.94248 | 99.27346 |
| 1095.61447 | 93.82589 | 93.01899 | 88.07081 | 86.12765 | 99.59615 |
| 1096.57892 | 94.11445 | 93.24807 | 88.22556 | 86.33924 | 99.87084 |
| 1097.54337 | 94.50832 | 93.46561 | 88.42022 | 86.55614 | 100.1083 |
| 1098.50782 | 94.97719 | 93.71678 | 88.67755 | 86.79698 | 100.3409 |
| 1099.47227 | 95.49395 | 93.9881  | 88.91916 | 87.04515 | 100.5427 |
| 1100.43672 | 96.09071 | 94.25203 | 89.17597 | 87.30789 | 100.7007 |
| 1101.40117 | 96.728   | 94.50649 | 89.46952 | 87.58073 | 100.8052 |
| 1102.36562 | 97.38167 | 94.7531  | 89.74938 | 87.83765 | 100.8945 |
| 1103.33007 | 98.04888 | 94.99016 | 90.01372 | 88.06663 | 100.9963 |
| 1104.29452 | 98.74731 | 95.26408 | 90.31401 | 88.32606 | 101.1077 |
| 1105.25897 | 99.41552 | 95.47985 | 90.59527 | 88.56902 | 101.1632 |
| 1106.22342 | 100.0261 | 95.65552 | 90.83997 | 88.80376 | 101.1934 |
| 1107.18787 | 100.5585 | 95.80281 | 91.04655 | 88.9684  | 101.1982 |
| 1108.15232 | 101.0376 | 95.92139 | 91.20857 | 89.10117 | 101.1978 |
| 1109.11676 | 101.4467 | 95.97723 | 91.34381 | 89.20132 | 101.1531 |
| 1110.08121 | 101.8009 | 95.97586 | 91.45298 | 89.26719 | 101.0594 |
| 1111.04566 | 102.0753 | 95.89886 | 91.49957 | 89.26062 | 100.8755 |
| 1112.01011 | 102.2733 | 95.80612 | 91.49895 | 89.18463 | 100.6663 |
| 1112.97456 | 102.3863 | 95.6418  | 91.42285 | 89.0135  | 100.3874 |
| 1113.93901 | 102.4168 | 95.37636 | 91.31235 | 88.80949 | 100.0371 |
| 1114.90346 | 102.3603 | 95.02366 | 91.17568 | 88.58332 | 99.59199 |
| 1115.86791 | 102.2435 | 94.63284 | 90.99137 | 88.32473 | 99.14248 |
| 1116.83236 | 102.0844 | 94.20747 | 90.75253 | 87.99785 | 98.65793 |
| 1117.79681 | 101.9018 | 93.76165 | 90.5006  | 87.63363 | 98.10966 |
| 1118.76126 | 101.6528 | 93.22947 | 90.20314 | 87.22498 | 97.47861 |
| 1119.72571 | 101.3707 | 92.63459 | 89.88245 | 86.78602 | 96.80509 |
| 1120.69016 | 101.0561 | 91.98505 | 89.51381 | 86.25721 | 96.05941 |
| 1121.65461 | 100.7237 | 91.3207  | 89.11835 | 85.70355 | 95.29564 |
| 1122.61905 | 100.3466 | 90.59448 | 88.6711  | 85.11468 | 94.46672 |
| 1123.5835  | 99.9274  | 89.81981 | 88.20214 | 84.49453 | 93.56912 |

|            |          |          |          |          |          |
|------------|----------|----------|----------|----------|----------|
| 1124.54795 | 99.4862  | 89.00622 | 87.70645 | 83.8335  | 92.63227 |
| 1125.5124  | 99.02316 | 88.15427 | 87.15523 | 83.15124 | 91.68426 |
| 1126.47685 | 98.50044 | 87.24449 | 86.58244 | 82.39732 | 90.64789 |
| 1127.4413  | 97.9283  | 86.30226 | 86.01232 | 81.60118 | 89.56116 |
| 1128.40575 | 97.28479 | 85.31051 | 85.37688 | 80.7761  | 88.43989 |
| 1129.3702  | 96.63707 | 84.35172 | 84.72886 | 79.94386 | 87.31087 |
| 1130.33465 | 96.00916 | 83.40265 | 84.11028 | 79.11159 | 86.14939 |
| 1131.2991  | 95.40761 | 82.47826 | 83.54487 | 78.29685 | 85.0101  |
| 1132.26355 | 94.80454 | 81.57267 | 83.00587 | 77.50439 | 83.9183  |
| 1133.228   | 94.21228 | 80.73985 | 82.4938  | 76.79197 | 82.90012 |
| 1134.19245 | 93.66808 | 79.94932 | 81.98857 | 76.10813 | 81.91148 |
| 1135.1569  | 93.17624 | 79.22547 | 81.52945 | 75.47961 | 80.98517 |
| 1136.12135 | 92.7175  | 78.56609 | 81.10592 | 74.92197 | 80.15737 |
| 1137.0858  | 92.31607 | 78.01576 | 80.75573 | 74.47361 | 79.48674 |
| 1138.05024 | 91.97046 | 77.56997 | 80.48689 | 74.08566 | 78.92181 |
| 1139.01469 | 91.71749 | 77.20861 | 80.26458 | 73.7619  | 78.45151 |
| 1139.97914 | 91.52249 | 76.95327 | 80.10779 | 73.52494 | 78.09698 |
| 1140.94359 | 91.41035 | 76.84188 | 80.06367 | 73.40497 | 77.89564 |
| 1141.90804 | 91.40288 | 76.82592 | 80.086   | 73.37606 | 77.80839 |
| 1142.87249 | 91.461   | 76.88313 | 80.15196 | 73.4217  | 77.8376  |
| 1143.83694 | 91.542   | 76.98637 | 80.22802 | 73.53096 | 77.9452  |
| 1144.80139 | 91.676   | 77.15491 | 80.3408  | 73.70221 | 78.14056 |
| 1145.76584 | 91.86145 | 77.3843  | 80.49863 | 73.91102 | 78.40574 |
| 1146.73029 | 92.06244 | 77.66102 | 80.68394 | 74.14689 | 78.72495 |
| 1147.69474 | 92.27899 | 77.92264 | 80.86826 | 74.40727 | 79.07357 |
| 1148.65919 | 92.5276  | 78.17124 | 81.0781  | 74.68406 | 79.45264 |
| 1149.62364 | 92.75556 | 78.4038  | 81.2637  | 74.91969 | 79.80607 |
| 1150.58809 | 92.92    | 78.60487 | 81.40877 | 75.09694 | 80.12037 |
| 1151.55254 | 93.01872 | 78.72318 | 81.4941  | 75.21571 | 80.33482 |
| 1152.51699 | 93.07245 | 78.76456 | 81.54958 | 75.29148 | 80.47303 |
| 1153.48143 | 93.07259 | 78.73752 | 81.55303 | 75.29838 | 80.50936 |
| 1154.44588 | 93.05341 | 78.66136 | 81.50413 | 75.23865 | 80.48916 |
| 1155.41033 | 92.94831 | 78.47222 | 81.3691  | 75.06144 | 80.35815 |
| 1156.37478 | 92.74656 | 78.17611 | 81.19919 | 74.82322 | 80.12109 |
| 1157.33923 | 92.46784 | 77.79993 | 80.96207 | 74.50089 | 79.79165 |
| 1158.30368 | 92.14593 | 77.37165 | 80.67286 | 74.11264 | 79.40957 |
| 1159.26813 | 91.76717 | 76.85249 | 80.33513 | 73.65902 | 78.89363 |
| 1160.23258 | 91.35831 | 76.2792  | 79.99223 | 73.1668  | 78.26091 |
| 1161.19703 | 90.91139 | 75.66249 | 79.62832 | 72.64814 | 77.57239 |
| 1162.16148 | 90.439   | 75.01887 | 79.22069 | 72.09758 | 76.86827 |
| 1163.12593 | 89.95544 | 74.35705 | 78.78515 | 71.48674 | 76.11651 |
| 1164.09038 | 89.46536 | 73.70648 | 78.35527 | 70.8857  | 75.33485 |
| 1165.05483 | 88.95961 | 73.08041 | 77.9493  | 70.3164  | 74.55281 |
| 1166.01928 | 88.53414 | 72.54014 | 77.62823 | 69.82046 | 73.87649 |
| 1166.98373 | 88.18145 | 72.07366 | 77.34471 | 69.40197 | 73.27828 |
| 1167.94818 | 87.84291 | 71.65518 | 77.06808 | 69.02843 | 72.7351  |
| 1168.91262 | 87.53785 | 71.28292 | 76.83158 | 68.69784 | 72.24644 |
| 1169.87707 | 87.30067 | 70.98409 | 76.67612 | 68.47334 | 71.84143 |
| 1170.84152 | 87.12509 | 70.78052 | 76.56929 | 68.28622 | 71.51858 |
| 1171.80597 | 87.0132  | 70.67044 | 76.49839 | 68.16441 | 71.29345 |
| 1172.77042 | 86.93441 | 70.60508 | 76.46384 | 68.10004 | 71.13013 |
| 1173.73487 | 86.83025 | 70.60385 | 76.46069 | 68.06706 | 71.00749 |
| 1174.69932 | 86.71644 | 70.66633 | 76.43031 | 68.03591 | 70.95897 |
| 1175.66377 | 86.78901 | 70.82967 | 76.50349 | 68.13825 | 71.06061 |



|            |          |          |          |          |          |
|------------|----------|----------|----------|----------|----------|
| 1176.62822 | 87.02775 | 71.10057 | 76.69453 | 68.3429  | 71.22094 |
| 1177.59267 | 87.23855 | 71.38993 | 76.89638 | 68.55582 | 71.40066 |
| 1178.55712 | 87.43554 | 71.70582 | 77.10473 | 68.79197 | 71.61771 |
| 1179.52157 | 87.6194  | 72.07333 | 77.29231 | 69.05261 | 71.89082 |
| 1180.48602 | 87.81244 | 72.45941 | 77.49131 | 69.31643 | 72.18153 |
| 1181.45047 | 88.02408 | 72.85391 | 77.70239 | 69.59346 | 72.49573 |
| 1182.41492 | 88.23915 | 73.24659 | 77.92355 | 69.88293 | 72.83327 |
| 1183.37937 | 88.45583 | 73.6171  | 78.14178 | 70.19673 | 73.21396 |
| 1184.34381 | 88.66543 | 73.98283 | 78.35778 | 70.48777 | 73.58113 |
| 1185.30826 | 88.8894  | 74.38492 | 78.59018 | 70.79778 | 73.94892 |
| 1186.27271 | 89.11874 | 74.8032  | 78.83972 | 71.14125 | 74.31255 |
| 1187.23716 | 89.3829  | 75.21262 | 79.0842  | 71.49115 | 74.7348  |
| 1188.20161 | 89.61415 | 75.58025 | 79.29175 | 71.8187  | 75.16951 |
| 1189.16606 | 89.84118 | 75.9652  | 79.51285 | 72.14673 | 75.59186 |
| 1190.13051 | 90.07211 | 76.32681 | 79.74706 | 72.45271 | 75.97365 |
| 1191.09496 | 90.32905 | 76.68817 | 80.01799 | 72.79745 | 76.36708 |
| 1192.05941 | 90.59705 | 77.05826 | 80.2815  | 73.13753 | 76.78496 |
| 1193.02386 | 90.88117 | 77.43245 | 80.50454 | 73.45507 | 77.20893 |
| 1193.98831 | 91.17463 | 77.80166 | 80.71962 | 73.76076 | 77.60735 |
| 1194.95276 | 91.47594 | 78.16242 | 80.9612  | 74.08689 | 77.99184 |
| 1195.91721 | 91.77294 | 78.47368 | 81.19346 | 74.38514 | 78.32302 |
| 1196.88166 | 92.07161 | 78.79446 | 81.43398 | 74.69065 | 78.67365 |
| 1197.84611 | 92.30018 | 79.06798 | 81.61348 | 74.94956 | 78.97761 |
| 1198.81055 | 92.49905 | 79.30618 | 81.78132 | 75.19445 | 79.26576 |
| 1199.775   | 92.69109 | 79.52406 | 81.96177 | 75.42927 | 79.54724 |
| 1200.73945 | 92.82192 | 79.72724 | 82.07915 | 75.60286 | 79.77755 |
| 1201.7039  | 92.90783 | 79.91152 | 82.15344 | 75.75917 | 79.98686 |
| 1202.66835 | 93.04989 | 80.08657 | 82.26477 | 75.93109 | 80.2038  |
| 1203.6328  | 93.27032 | 80.27794 | 82.41889 | 76.09818 | 80.40675 |
| 1204.59725 | 93.48735 | 80.48094 | 82.56938 | 76.27642 | 80.64324 |
| 1205.5617  | 93.63095 | 80.6299  | 82.65418 | 76.41803 | 80.85469 |
| 1206.52615 | 93.75461 | 80.73653 | 82.71053 | 76.54654 | 81.01858 |
| 1207.4906  | 93.85262 | 80.79384 | 82.76205 | 76.61746 | 81.12714 |
| 1208.45505 | 93.93996 | 80.82749 | 82.81653 | 76.66134 | 81.20612 |
| 1209.4195  | 94.0058  | 80.83629 | 82.82072 | 76.67351 | 81.26059 |
| 1210.38395 | 94.02328 | 80.78272 | 82.79088 | 76.65879 | 81.2636  |
| 1211.3484  | 94.01842 | 80.68844 | 82.77415 | 76.59776 | 81.16487 |
| 1212.31285 | 93.97521 | 80.51612 | 82.70825 | 76.48724 | 80.97575 |
| 1213.2773  | 93.88333 | 80.22967 | 82.55813 | 76.31568 | 80.71711 |
| 1214.24174 | 93.70826 | 79.90162 | 82.35848 | 76.06952 | 80.3865  |
| 1215.20619 | 93.49828 | 79.57031 | 82.17509 | 75.8018  | 80.00947 |
| 1216.17064 | 93.29907 | 79.24537 | 82.00778 | 75.56265 | 79.6382  |
| 1217.13509 | 93.08433 | 78.89624 | 81.80616 | 75.31511 | 79.2348  |
| 1218.09954 | 92.90692 | 78.60361 | 81.62847 | 75.09275 | 78.87856 |
| 1219.06399 | 92.76437 | 78.33591 | 81.48106 | 74.88856 | 78.57118 |
| 1220.02844 | 92.64792 | 78.11195 | 81.39006 | 74.74177 | 78.28781 |
| 1220.99289 | 92.53915 | 77.92805 | 81.28129 | 74.60596 | 78.07366 |
| 1221.95734 | 92.47518 | 77.79921 | 81.21226 | 74.51055 | 77.95346 |
| 1222.92179 | 92.43454 | 77.6833  | 81.14514 | 74.42299 | 77.83419 |
| 1223.88624 | 92.4217  | 77.5789  | 81.10599 | 74.36863 | 77.74066 |
| 1224.85069 | 92.37444 | 77.44783 | 81.07326 | 74.28576 | 77.60204 |
| 1225.81514 | 92.31902 | 77.30477 | 80.9796  | 74.17758 | 77.4947  |
| 1226.77959 | 92.23798 | 77.14318 | 80.87073 | 74.0602  | 77.3336  |
| 1227.74403 | 92.1434  | 76.94427 | 80.76466 | 73.92531 | 77.10762 |

|            |          |          |          |          |          |
|------------|----------|----------|----------|----------|----------|
| 1228.70849 | 92.04953 | 76.72431 | 80.66465 | 73.78224 | 76.85086 |
| 1229.67293 | 91.93437 | 76.46778 | 80.57006 | 73.61388 | 76.52451 |
| 1230.63738 | 91.755   | 76.16569 | 80.42018 | 73.36449 | 76.13808 |
| 1231.60183 | 91.54845 | 75.85422 | 80.25741 | 73.10615 | 75.73046 |
| 1232.56628 | 91.36352 | 75.55166 | 80.10813 | 72.87183 | 75.29006 |
| 1233.53073 | 91.16292 | 75.27597 | 79.95717 | 72.62746 | 74.85182 |
| 1234.49518 | 90.94702 | 75.00825 | 79.80672 | 72.37491 | 74.43546 |
| 1235.45963 | 90.72586 | 74.7483  | 79.65351 | 72.13913 | 74.03147 |
| 1236.42408 | 90.53545 | 74.51027 | 79.52778 | 71.93946 | 73.63894 |
| 1237.38853 | 90.40692 | 74.34084 | 79.48508 | 71.8013  | 73.31669 |
| 1238.35298 | 90.3077  | 74.2243  | 79.43799 | 71.67836 | 73.02522 |
| 1239.31743 | 90.24843 | 74.16056 | 79.40736 | 71.61915 | 72.81717 |
| 1240.28188 | 90.20893 | 74.09805 | 79.42151 | 71.62286 | 72.6985  |
| 1241.24633 | 90.22333 | 74.09011 | 79.47925 | 71.69163 | 72.65552 |
| 1242.21078 | 90.3209  | 74.25178 | 79.61873 | 71.80982 | 72.6952  |
| 1243.17523 | 90.44641 | 74.48538 | 79.80143 | 71.96857 | 72.79823 |
| 1244.13967 | 90.59356 | 74.71068 | 79.97271 | 72.14848 | 72.93468 |
| 1245.10412 | 90.77324 | 74.93205 | 80.14903 | 72.3683  | 73.17671 |
| 1246.06857 | 90.95266 | 75.15373 | 80.34673 | 72.61327 | 73.43765 |
| 1247.03302 | 91.11797 | 75.38815 | 80.52228 | 72.83783 | 73.68252 |
| 1247.99747 | 91.26935 | 75.6128  | 80.66849 | 73.02767 | 73.9065  |
| 1248.96192 | 91.41136 | 75.81901 | 80.81723 | 73.21722 | 74.13462 |
| 1249.92637 | 91.55347 | 76.00995 | 80.99084 | 73.39851 | 74.3428  |
| 1250.89082 | 91.721   | 76.23122 | 81.19161 | 73.60449 | 74.56113 |
| 1251.85527 | 91.8648  | 76.45315 | 81.36216 | 73.78845 | 74.78043 |
| 1252.81972 | 91.99787 | 76.67789 | 81.52837 | 73.97157 | 75.02266 |
| 1253.78417 | 92.18511 | 76.92621 | 81.76622 | 74.20721 | 75.29895 |
| 1254.74862 | 92.43291 | 77.2417  | 82.05525 | 74.50431 | 75.63106 |
| 1255.71307 | 92.7073  | 77.60504 | 82.35959 | 74.85368 | 76.01179 |
| 1256.67752 | 93.06013 | 78.05049 | 82.71084 | 75.27945 | 76.50851 |
| 1257.64197 | 93.46482 | 78.58126 | 83.1216  | 75.76036 | 77.0928  |
| 1258.60642 | 93.92028 | 79.20978 | 83.58004 | 76.29279 | 77.78024 |
| 1259.57086 | 94.39001 | 79.89319 | 84.11978 | 76.87357 | 78.4831  |
| 1260.53531 | 94.88269 | 80.60505 | 84.58956 | 77.47018 | 79.29543 |
| 1261.49976 | 95.37921 | 81.31811 | 84.98518 | 78.11298 | 80.26462 |
| 1262.46421 | 95.88774 | 82.06804 | 85.45507 | 78.7788  | 81.19929 |
| 1263.42866 | 96.43129 | 82.86464 | 85.93646 | 79.41883 | 82.12092 |
| 1264.39311 | 96.95481 | 83.67594 | 86.38486 | 80.03719 | 83.0361  |
| 1265.35756 | 97.41533 | 84.44586 | 86.78982 | 80.5948  | 83.86142 |
| 1266.32201 | 97.85259 | 85.17297 | 87.15481 | 81.11798 | 84.65465 |
| 1267.28646 | 98.25867 | 85.85914 | 87.51565 | 81.61283 | 85.41118 |
| 1268.25091 | 98.63673 | 86.53248 | 87.87653 | 82.07497 | 86.10388 |
| 1269.21536 | 98.97884 | 87.1364  | 88.17314 | 82.47731 | 86.72289 |
| 1270.17981 | 99.3115  | 87.72423 | 88.44938 | 82.86736 | 87.3055  |
| 1271.14426 | 99.61219 | 88.27409 | 88.77164 | 83.24185 | 87.80766 |
| 1272.10871 | 99.88951 | 88.73197 | 88.98885 | 83.5662  | 88.27682 |
| 1273.07316 | 100.1144 | 89.05094 | 89.05852 | 83.86717 | 88.8056  |
| 1274.03761 | 100.28   | 89.35192 | 89.18641 | 84.15402 | 89.21627 |
| 1275.00205 | 100.4262 | 89.64826 | 89.30939 | 84.36431 | 89.53878 |
| 1275.9665  | 100.5344 | 89.89042 | 89.41138 | 84.54332 | 89.82493 |
| 1276.93095 | 100.6331 | 90.05877 | 89.47385 | 84.66001 | 90.07398 |
| 1277.8954  | 100.7203 | 90.2016  | 89.51422 | 84.73901 | 90.27325 |
| 1278.85985 | 100.7827 | 90.32162 | 89.56652 | 84.79583 | 90.42748 |
| 1279.8243  | 100.8182 | 90.41102 | 89.62205 | 84.84156 | 90.50299 |

|            |          |          |          |          |          |
|------------|----------|----------|----------|----------|----------|
| 1280.78875 | 100.8348 | 90.44248 | 89.62008 | 84.84403 | 90.56603 |
| 1281.7532  | 100.861  | 90.46014 | 89.61139 | 84.84894 | 90.62841 |
| 1282.71765 | 100.8644 | 90.46036 | 89.59575 | 84.84219 | 90.65806 |
| 1283.6821  | 100.8508 | 90.49182 | 89.61274 | 84.83708 | 90.65864 |
| 1284.64655 | 100.8793 | 90.56344 | 89.64616 | 84.85143 | 90.73129 |
| 1285.611   | 100.9569 | 90.68972 | 89.71078 | 84.92136 | 90.88389 |
| 1286.57545 | 101.0534 | 90.88333 | 89.85594 | 85.0304  | 90.99204 |
| 1287.5399  | 101.1714 | 91.10023 | 90.03449 | 85.16493 | 91.1072  |
| 1288.50435 | 101.3475 | 91.30581 | 90.14496 | 85.33017 | 91.41962 |
| 1289.46879 | 101.5241 | 91.51698 | 90.27705 | 85.56402 | 91.79589 |
| 1290.43324 | 101.6769 | 91.75668 | 90.42655 | 85.78139 | 92.10415 |
| 1291.39769 | 101.8589 | 92.01324 | 90.57246 | 86.01701 | 92.44677 |
| 1292.36214 | 102.0945 | 92.28725 | 90.76705 | 86.29385 | 92.82638 |
| 1293.32659 | 102.3373 | 92.58909 | 90.98094 | 86.5794  | 93.20739 |
| 1294.29104 | 102.5486 | 92.87417 | 91.15034 | 86.81521 | 93.55022 |
| 1295.25549 | 102.7136 | 93.08774 | 91.29231 | 86.98264 | 93.7904  |
| 1296.21994 | 102.7907 | 93.15648 | 91.39265 | 87.03805 | 93.84636 |
| 1297.18439 | 102.8319 | 93.12994 | 91.40528 | 87.04591 | 93.87061 |
| 1298.14884 | 102.8226 | 93.00087 | 91.33088 | 87.00605 | 93.84299 |
| 1299.11329 | 102.7602 | 92.82019 | 91.22573 | 86.90273 | 93.65878 |
| 1300.07774 | 102.6449 | 92.58017 | 91.10656 | 86.75447 | 93.36061 |
| 1301.04219 | 102.504  | 92.26367 | 90.97144 | 86.55267 | 92.95904 |
| 1302.00664 | 102.352  | 91.89663 | 90.79148 | 86.31964 | 92.54567 |
| 1302.97108 | 102.2202 | 91.59753 | 90.64568 | 86.12366 | 92.17713 |
| 1303.93554 | 102.1074 | 91.36323 | 90.53316 | 85.9582  | 91.81869 |
| 1304.89998 | 102.0136 | 91.17091 | 90.48521 | 85.85705 | 91.4809  |
| 1305.86443 | 101.9427 | 91.06097 | 90.44572 | 85.78924 | 91.27482 |
| 1306.82888 | 101.9364 | 91.09985 | 90.49746 | 85.80113 | 91.20915 |
| 1307.79333 | 101.9873 | 91.2249  | 90.61916 | 85.89088 | 91.1942  |
| 1308.75778 | 102.1314 | 91.44056 | 90.72129 | 86.05877 | 91.40519 |
| 1309.72223 | 102.3292 | 91.77062 | 90.87568 | 86.32614 | 91.83927 |
| 1310.68668 | 102.5718 | 92.22808 | 91.12573 | 86.62864 | 92.276   |
| 1311.65113 | 102.8556 | 92.79208 | 91.54651 | 86.96174 | 92.70679 |
| 1312.61558 | 103.1667 | 93.39884 | 91.99326 | 87.29354 | 93.10842 |
| 1313.58003 | 103.5087 | 93.90264 | 92.25365 | 87.66881 | 93.80017 |
| 1314.54448 | 103.7804 | 94.33567 | 92.46076 | 88.0699  | 94.51782 |
| 1315.50893 | 104.0522 | 94.81335 | 92.65874 | 88.42252 | 95.21692 |
| 1316.47338 | 104.2569 | 95.31605 | 92.99529 | 88.74399 | 95.62204 |
| 1317.43783 | 104.5836 | 95.83872 | 93.30593 | 89.0288  | 96.12587 |
| 1318.40227 | 104.8317 | 96.32118 | 93.73101 | 89.39577 | 96.51685 |
| 1319.36672 | 105.0728 | 96.71693 | 93.91836 | 89.62917 | 96.90157 |
| 1320.33117 | 105.265  | 96.90641 | 93.90052 | 89.91729 | 97.56241 |
| 1321.29562 | 105.4374 | 97.10753 | 93.93996 | 90.21236 | 98.10551 |
| 1322.26007 | 105.6317 | 97.37022 | 94.08101 | 90.49605 | 98.54238 |
| 1323.22452 | 105.8429 | 97.65866 | 94.25134 | 90.71414 | 98.88054 |
| 1324.18897 | 106.0484 | 97.92871 | 94.39565 | 90.94066 | 99.26582 |
| 1325.15342 | 106.2339 | 98.18425 | 94.54614 | 91.16137 | 99.62342 |
| 1326.11787 | 106.4342 | 98.45517 | 94.71904 | 91.37963 | 99.95448 |
| 1327.08232 | 106.6186 | 98.70796 | 94.85818 | 91.56578 | 100.2227 |
| 1328.04677 | 106.7433 | 98.89894 | 94.96936 | 91.72656 | 100.489  |
| 1329.01122 | 106.8214 | 99.01098 | 95.06451 | 91.83796 | 100.6914 |
| 1329.97567 | 106.8968 | 99.09957 | 95.1598  | 91.92864 | 100.8154 |
| 1330.94012 | 106.9495 | 99.1245  | 95.16466 | 91.96756 | 100.9031 |
| 1331.90457 | 106.9237 | 99.08878 | 95.14013 | 91.97119 | 100.899  |

|            |          |          |          |          |          |
|------------|----------|----------|----------|----------|----------|
| 1332.86902 | 106.851  | 99.01831 | 95.04565 | 91.87234 | 100.8148 |
| 1333.83346 | 106.7698 | 98.91711 | 94.96327 | 91.79156 | 100.7125 |
| 1334.79791 | 106.7411 | 98.82992 | 94.90529 | 91.68683 | 100.6288 |
| 1335.76236 | 106.6455 | 98.7915  | 95.07107 | 91.6033  | 100.2951 |
| 1336.72681 | 106.6357 | 98.82012 | 95.14214 | 91.34949 | 99.92265 |
| 1337.69126 | 106.6744 | 98.88021 | 95.31939 | 91.25669 | 99.81713 |
| 1338.65571 | 106.6036 | 99.03711 | 95.76544 | 91.09488 | 99.21561 |
| 1339.62016 | 106.4318 | 99.01612 | 95.8588  | 90.79908 | 98.62547 |
| 1340.58461 | 106.2372 | 98.57528 | 95.23616 | 90.65966 | 98.74497 |
| 1341.54906 | 106.1804 | 98.11544 | 94.55135 | 90.81823 | 99.51775 |
| 1342.51351 | 106.0459 | 97.88291 | 94.43348 | 90.99107 | 99.70177 |
| 1343.47796 | 106.0245 | 97.80177 | 94.40194 | 90.95538 | 99.66894 |
| 1344.44241 | 105.9688 | 97.70453 | 94.35308 | 90.87848 | 99.59857 |
| 1345.40686 | 105.9032 | 97.6094  | 94.24766 | 90.7582  | 99.54466 |
| 1346.37131 | 105.7551 | 97.4137  | 94.14216 | 90.62246 | 99.38748 |
| 1347.33576 | 105.6256 | 97.19393 | 93.99548 | 90.43415 | 99.22506 |
| 1348.30021 | 105.4514 | 96.98213 | 93.95163 | 90.25779 | 98.92602 |
| 1349.26465 | 105.2797 | 96.75594 | 93.83767 | 89.98246 | 98.53126 |
| 1350.2291  | 105.0511 | 96.40882 | 93.55895 | 89.71706 | 98.274   |
| 1351.19355 | 104.8118 | 96.04247 | 93.33109 | 89.51018 | 98.05    |
| 1352.158   | 104.5777 | 95.7077  | 93.15926 | 89.26255 | 97.71041 |
| 1353.12245 | 104.4108 | 95.47438 | 93.03231 | 89.0212  | 97.41858 |
| 1354.0869  | 104.2159 | 95.29495 | 93.09049 | 88.81361 | 96.95568 |
| 1355.05135 | 104.1366 | 95.08447 | 92.98427 | 88.5494  | 96.56467 |
| 1356.0158  | 104.0692 | 94.752   | 92.73573 | 88.43584 | 96.53652 |
| 1356.98025 | 103.955  | 94.54601 | 92.68612 | 88.40414 | 96.40181 |
| 1357.9447  | 103.8497 | 94.42345 | 92.66938 | 88.31319 | 96.18059 |
| 1358.90915 | 103.9109 | 94.40415 | 92.61912 | 88.2648  | 96.25406 |
| 1359.8736  | 103.9661 | 94.5091  | 92.91992 | 88.37867 | 96.23544 |
| 1360.83805 | 104.0877 | 94.82416 | 93.36919 | 88.35985 | 95.87157 |
| 1361.8025  | 104.3132 | 95.18745 | 93.84692 | 88.3447  | 95.77192 |
| 1362.76695 | 104.1043 | 95.20329 | 94.38649 | 88.41708 | 95.05535 |
| 1363.7314  | 104.2091 | 94.7838  | 93.54942 | 88.23985 | 95.56982 |
| 1364.69584 | 104.2941 | 94.53766 | 93.21636 | 88.74588 | 96.6552  |
| 1365.66029 | 104.375  | 94.67526 | 93.38297 | 89.18649 | 97.13084 |
| 1366.62474 | 104.6659 | 95.09715 | 93.67829 | 89.57128 | 97.75684 |
| 1367.58919 | 105.0453 | 95.72222 | 94.35511 | 90.08602 | 98.23085 |
| 1368.55364 | 105.5206 | 96.4163  | 94.97953 | 90.52894 | 98.60106 |
| 1369.51809 | 105.9633 | 96.81757 | 94.97471 | 90.88647 | 99.49049 |
| 1370.48254 | 106.21   | 97.14739 | 95.07558 | 91.38007 | 100.2818 |
| 1371.44699 | 106.526  | 97.7005  | 95.34938 | 91.72838 | 100.7815 |
| 1372.41144 | 106.8742 | 98.39042 | 95.94146 | 92.05642 | 101.1359 |
| 1373.37589 | 107.1049 | 99.19524 | 96.87735 | 92.2801  | 100.8053 |
| 1374.34034 | 107.4254 | 99.91843 | 97.22954 | 92.28807 | 100.7384 |
| 1375.30479 | 107.5483 | 99.92124 | 96.71052 | 92.44869 | 101.4626 |
| 1376.26924 | 107.531  | 99.67882 | 96.16622 | 92.72913 | 102.3332 |
| 1377.23369 | 107.4282 | 99.70298 | 96.21199 | 92.9543  | 102.4878 |
| 1378.19814 | 107.3933 | 99.78903 | 96.23587 | 92.91663 | 102.393  |
| 1379.16259 | 107.288  | 99.65115 | 96.06996 | 92.86967 | 102.4121 |
| 1380.12703 | 107.1982 | 99.40634 | 95.84517 | 92.78205 | 102.3893 |
| 1381.09148 | 107.0655 | 99.08772 | 95.61182 | 92.62309 | 102.2057 |
| 1382.05593 | 106.7827 | 98.6651  | 95.33868 | 92.29869 | 101.7125 |
| 1383.02038 | 106.4624 | 98.15472 | 95.0212  | 91.90354 | 101.1201 |
| 1383.98483 | 106.1762 | 97.645   | 94.70661 | 91.47664 | 100.5127 |

|            |          |          |          |          |          |
|------------|----------|----------|----------|----------|----------|
| 1384.94928 | 106.0888 | 97.39366 | 94.62151 | 91.11174 | 99.99117 |
| 1385.91373 | 106.1444 | 97.54604 | 95.10573 | 90.90511 | 99.31937 |
| 1386.87818 | 105.8946 | 97.62868 | 95.76706 | 90.64757 | 97.9705  |
| 1387.84263 | 105.8202 | 97.17042 | 94.96683 | 90.01602 | 97.56263 |
| 1388.80708 | 105.8708 | 96.72187 | 94.2583  | 90.08342 | 98.372   |
| 1389.77153 | 105.755  | 96.55602 | 94.27961 | 90.3644  | 98.56294 |
| 1390.73598 | 105.7602 | 96.60921 | 94.32366 | 90.3936  | 98.56223 |
| 1391.70043 | 105.941  | 96.881   | 94.3844  | 90.52256 | 98.83807 |
| 1392.66488 | 106.3248 | 97.41601 | 94.78725 | 90.80373 | 99.31223 |
| 1393.62933 | 106.5701 | 98.16739 | 95.97305 | 91.24058 | 99.13222 |
| 1394.59378 | 106.9685 | 99.21753 | 97.04085 | 91.28069 | 98.51373 |
| 1395.55822 | 107.428  | 99.6793  | 96.79857 | 91.40602 | 99.38156 |
| 1396.52267 | 107.6582 | 99.78259 | 96.60388 | 92.01913 | 100.6795 |
| 1397.48712 | 107.9837 | 100.2847 | 97.17269 | 92.65894 | 101.3936 |
| 1398.45157 | 108.284  | 101.0754 | 98.33607 | 93.31273 | 101.4207 |
| 1399.41602 | 108.8493 | 101.7429 | 98.47657 | 93.73903 | 102.2471 |
| 1400.38047 | 109.2802 | 101.8959 | 97.87403 | 94.27291 | 103.9489 |
| 1401.34492 | 109.3955 | 102.1023 | 97.88269 | 94.90672 | 104.8317 |
| 1402.30937 | 109.7257 | 102.6484 | 98.09511 | 95.28935 | 105.4249 |
| 1403.27382 | 110.1077 | 103.3243 | 98.5331  | 95.66259 | 105.9683 |
| 1404.23827 | 110.2169 | 103.9745 | 99.41798 | 95.99439 | 105.6981 |
| 1405.20272 | 110.4357 | 104.292  | 99.50733 | 95.84368 | 105.5371 |
| 1406.16717 | 110.6402 | 104.0479 | 98.80629 | 95.90462 | 106.517  |
| 1407.13162 | 110.4597 | 103.8029 | 98.6762  | 96.20514 | 106.8008 |
| 1408.09607 | 110.3709 | 103.7167 | 98.59148 | 96.14648 | 106.7686 |
| 1409.06051 | 110.2258 | 103.5845 | 98.58947 | 96.01419 | 106.4999 |
| 1410.02496 | 110.1666 | 103.4387 | 98.52583 | 95.73309 | 106.1548 |
| 1410.98941 | 109.9813 | 103.224  | 98.50423 | 95.52934 | 105.6851 |
| 1411.95386 | 109.8017 | 102.9546 | 98.28161 | 95.16977 | 105.2054 |
| 1412.91831 | 109.5944 | 102.4529 | 97.87323 | 94.90045 | 104.9702 |
| 1413.88276 | 109.3591 | 101.9101 | 97.54906 | 94.5768  | 104.583  |
| 1414.84721 | 109.1284 | 101.4833 | 97.50965 | 94.25838 | 104.0538 |
| 1415.81166 | 109.0098 | 101.3396 | 97.74514 | 93.90681 | 103.3772 |
| 1416.77611 | 108.9876 | 101.4601 | 98.17069 | 93.62054 | 102.6226 |
| 1417.74056 | 109.2805 | 101.9225 | 98.74119 | 93.42902 | 102.3571 |
| 1418.70501 | 108.7964 | 102.0728 | 99.99496 | 93.69576 | 101.141  |
| 1419.66946 | 108.7217 | 101.7427 | 98.75288 | 92.76541 | 100.6148 |
| 1420.63391 | 108.9135 | 101.1838 | 97.29585 | 93.00198 | 102.637  |
| 1421.59836 | 108.8502 | 101.065  | 97.16511 | 93.55785 | 103.4188 |
| 1422.56281 | 109.0531 | 101.5755 | 97.70009 | 93.89314 | 103.6745 |
| 1423.52726 | 109.0395 | 102.3515 | 98.72532 | 94.05601 | 102.8512 |
| 1424.4917  | 109.3827 | 102.577  | 98.18382 | 93.9242  | 103.4903 |
| 1425.45615 | 109.4739 | 102.2902 | 97.64736 | 94.35847 | 104.6427 |
| 1426.4206  | 109.5203 | 102.3296 | 97.66965 | 94.62792 | 105.0167 |
| 1427.38505 | 109.6427 | 102.6065 | 97.86141 | 94.71215 | 105.1184 |
| 1428.3495  | 109.8291 | 103.0587 | 98.29346 | 94.81128 | 105.1399 |
| 1429.31395 | 109.6834 | 103.3973 | 99.01882 | 94.86521 | 104.4251 |
| 1430.2784  | 109.6556 | 103.3049 | 98.62359 | 94.36174 | 104.0234 |
| 1431.24285 | 109.6054 | 102.8152 | 97.92112 | 94.30385 | 104.5919 |
| 1432.2073  | 109.3421 | 102.561  | 97.96456 | 94.42063 | 104.4401 |
| 1433.17175 | 109.2822 | 102.4807 | 97.90471 | 94.21776 | 104.1544 |
| 1434.1362  | 109.514  | 102.5178 | 97.77362 | 94.09124 | 104.3263 |
| 1435.10065 | 109.6468 | 102.9105 | 98.49399 | 94.26344 | 104.2611 |
| 1436.0651  | 108.8681 | 103.1722 | 100.1163 | 94.49356 | 102.3963 |

|            |          |          |          |          |          |
|------------|----------|----------|----------|----------|----------|
| 1437.02955 | 108.7391 | 102.8131 | 98.91733 | 93.27871 | 101.6185 |
| 1437.994   | 109.1545 | 102.2641 | 97.58137 | 93.32421 | 103.3968 |
| 1438.95845 | 108.9371 | 101.7388 | 97.33517 | 93.79044 | 103.8878 |
| 1439.92289 | 108.7832 | 101.4662 | 97.18917 | 93.8578  | 103.908  |
| 1440.88734 | 108.6026 | 101.2086 | 97.03634 | 93.74469 | 103.764  |
| 1441.85179 | 108.4113 | 100.9369 | 96.81997 | 93.51468 | 103.5137 |
| 1442.81624 | 108.2068 | 100.6688 | 96.6017  | 93.29054 | 103.24   |
| 1443.78069 | 108.1115 | 100.5161 | 96.48268 | 93.08821 | 102.9484 |
| 1444.74514 | 108.0806 | 100.3521 | 96.42982 | 92.92206 | 102.6391 |
| 1445.70959 | 108.1631 | 100.2993 | 96.45074 | 92.70629 | 102.4204 |
| 1446.67404 | 108.05   | 100.3273 | 96.945   | 92.64871 | 101.9411 |
| 1447.63849 | 107.5219 | 100.0712 | 97.36079 | 92.21355 | 100.3623 |
| 1448.60294 | 107.2612 | 99.2384  | 96.12512 | 91.31125 | 100.1204 |
| 1449.56739 | 106.95   | 98.53674 | 95.47244 | 91.33681 | 100.6361 |
| 1450.53184 | 106.7507 | 98.27284 | 95.44073 | 91.3297  | 100.5046 |
| 1451.49629 | 106.5592 | 98.22465 | 95.66884 | 91.1463  | 99.83939 |
| 1452.46074 | 106.4575 | 98.05049 | 95.3693  | 90.7618  | 99.48899 |
| 1453.42519 | 106.5889 | 98.0519  | 95.347   | 90.78344 | 99.83035 |
| 1454.38964 | 106.8239 | 98.61969 | 96.28434 | 90.92523 | 99.40803 |
| 1455.35408 | 107.2834 | 99.67074 | 97.84506 | 90.96511 | 98.63403 |
| 1456.31853 | 107.3395 | 100.1842 | 99.60143 | 91.06492 | 97.00745 |
| 1457.28298 | 107.8737 | 100.3263 | 99.57327 | 89.77494 | 95.77205 |
| 1458.24743 | 107.1665 | 99.16532 | 98.39166 | 89.4651  | 95.75495 |
| 1459.21188 | 106.2999 | 97.30291 | 96.0357  | 89.22674 | 96.40166 |
| 1460.17633 | 105.8341 | 96.05749 | 94.55318 | 89.34122 | 97.46962 |
| 1461.14078 | 105.5309 | 95.54756 | 94.2455  | 89.6375  | 97.84697 |
| 1462.10523 | 105.6582 | 95.6674  | 94.34647 | 89.77902 | 98.0117  |
| 1463.06968 | 106.1337 | 96.39526 | 94.93561 | 90.05019 | 98.39888 |
| 1464.03413 | 106.1785 | 97.26668 | 96.42102 | 90.60726 | 97.87319 |
| 1464.99858 | 106.2394 | 97.83806 | 96.70493 | 90.37964 | 97.04968 |
| 1465.96303 | 106.5782 | 97.64696 | 95.43301 | 90.22726 | 98.57698 |
| 1466.92748 | 106.5474 | 97.5523  | 95.39404 | 90.93896 | 99.53318 |
| 1467.89193 | 106.8406 | 97.9448  | 95.59256 | 91.40607 | 100.1776 |
| 1468.85638 | 107.3121 | 98.6046  | 96.01273 | 91.95713 | 100.9178 |
| 1469.82083 | 108.1022 | 99.6208  | 96.69731 | 92.43951 | 101.7482 |
| 1470.78527 | 108.7388 | 100.9532 | 98.44446 | 93.19363 | 101.911  |
| 1471.74972 | 109.5341 | 103.0704 | 101.129  | 93.55964 | 100.6881 |
| 1472.71417 | 110.0956 | 104.1881 | 101.7585 | 93.21234 | 100.2136 |
| 1473.67862 | 110.0149 | 103.3565 | 99.83395 | 93.11916 | 101.4724 |
| 1474.64307 | 110.1339 | 102.8969 | 98.84932 | 93.5861  | 103.4427 |
| 1475.60752 | 109.597  | 102.7948 | 99.74259 | 94.40427 | 103.2052 |
| 1476.57197 | 109.9628 | 103.2207 | 99.51917 | 94.36162 | 103.5041 |
| 1477.53642 | 110.4118 | 103.2835 | 98.79356 | 94.84052 | 105.3478 |
| 1478.50087 | 110.5592 | 103.529  | 98.97114 | 95.58642 | 106.2701 |
| 1479.46532 | 111.0466 | 104.2265 | 99.39388 | 96.066   | 107.0539 |
| 1480.42977 | 111.3381 | 105.0634 | 100.2112 | 96.59222 | 107.3353 |
| 1481.39422 | 111.7461 | 105.9291 | 100.6434 | 96.8429  | 107.7219 |
| 1482.35867 | 112.1953 | 106.3709 | 100.4948 | 97.2781  | 108.9275 |
| 1483.32312 | 112.4161 | 106.7419 | 100.6096 | 97.80055 | 109.7712 |
| 1484.28757 | 112.7349 | 107.2981 | 100.9315 | 98.15219 | 110.4059 |
| 1485.25201 | 113.2221 | 108.0768 | 101.5279 | 98.44198 | 110.8721 |
| 1486.21646 | 113.5237 | 109.0406 | 102.7842 | 98.89499 | 110.6437 |
| 1487.18091 | 114.082  | 110.1125 | 103.8039 | 98.94672 | 110.3959 |
| 1488.14536 | 114.7659 | 110.6098 | 103.7673 | 98.82686 | 111.204  |

|            |          |          |          |          |          |
|------------|----------|----------|----------|----------|----------|
| 1489.10981 | 114.5644 | 111.0751 | 105.0555 | 99.18869 | 110.2842 |
| 1490.07426 | 114.5041 | 111.7297 | 105.9702 | 98.85843 | 108.8811 |
| 1491.03871 | 114.486  | 110.3165 | 103.571  | 98.3663  | 110.3241 |
| 1492.00316 | 114.2141 | 109.0411 | 102.0155 | 98.60574 | 111.7316 |
| 1492.96761 | 113.9218 | 108.5139 | 101.6623 | 98.86107 | 112.0191 |
| 1493.93206 | 114.0863 | 108.6498 | 101.7132 | 98.85394 | 112.0912 |
| 1494.89651 | 114.1414 | 109.0211 | 102.6232 | 99.03818 | 111.64   |
| 1495.86096 | 113.8695 | 109.5955 | 104.2385 | 99.03382 | 109.7162 |
| 1496.82541 | 114.7728 | 109.9527 | 103.4265 | 98.07316 | 110.2858 |
| 1497.78986 | 114.4881 | 109.3298 | 103.4314 | 98.58253 | 110.711  |
| 1498.7543  | 113.9092 | 108.9118 | 103.5947 | 98.49239 | 109.4965 |
| 1499.71876 | 113.9332 | 108.2127 | 102.0151 | 97.7769  | 110.1409 |
| 1500.6832  | 113.4435 | 107.4085 | 101.6056 | 97.9202  | 110.1659 |
| 1501.64765 | 113.2893 | 107.1211 | 101.578  | 97.79026 | 109.6704 |
| 1502.6121  | 113.4477 | 106.8419 | 101.2387 | 97.57985 | 109.7506 |
| 1503.57655 | 113.7854 | 107.0289 | 101.4686 | 97.62691 | 109.8871 |
| 1504.541   | 114.0255 | 107.9552 | 103.1745 | 98.05564 | 109.0787 |
| 1505.50545 | 114.4218 | 110.2943 | 107.0538 | 98.33022 | 106.4887 |
| 1506.4699  | 114.8935 | 112.2712 | 110.3912 | 96.24477 | 102.0697 |
| 1507.43435 | 114.4166 | 109.6154 | 106.6374 | 94.53153 | 102.0361 |
| 1508.3988  | 113.7357 | 107.4454 | 103.8964 | 94.78364 | 103.7594 |
| 1509.36325 | 112.6753 | 105.6394 | 102.1485 | 95.00922 | 104.3118 |
| 1510.3277  | 112.3789 | 104.4637 | 100.5558 | 94.78537 | 105.0684 |
| 1511.29215 | 111.8737 | 103.6466 | 100.3603 | 95.09292 | 105.1264 |
| 1512.2566  | 111.3067 | 103.1181 | 100.1804 | 94.74051 | 103.9995 |
| 1513.22105 | 111.6658 | 102.8107 | 99.28905 | 94.40467 | 104.7002 |
| 1514.18549 | 111.5328 | 102.6131 | 99.70088 | 94.75418 | 104.517  |
| 1515.14994 | 111.8201 | 103.218  | 100.5602 | 94.4731  | 103.6129 |
| 1516.11439 | 111.7934 | 103.9256 | 102.2203 | 94.45274 | 102.1928 |
| 1517.07884 | 111.1204 | 103.7598 | 102.6677 | 93.70624 | 99.75548 |
| 1518.04329 | 111.3021 | 102.3689 | 99.69552 | 92.82664 | 101.6057 |
| 1519.00774 | 111.2109 | 101.9477 | 99.72798 | 93.51624 | 102.5479 |
| 1519.97219 | 111.1027 | 102.835  | 102.1271 | 94.13369 | 101.0937 |
| 1520.93664 | 111.8136 | 104.9048 | 104.8364 | 93.48439 | 98.47157 |
| 1521.90109 | 111.629  | 104.0166 | 103.3328 | 92.71503 | 98.28909 |
| 1522.86554 | 111.1633 | 102.1462 | 100.5724 | 92.33233 | 99.32349 |
| 1523.82999 | 110.8479 | 101.1559 | 99.55933 | 92.46059 | 100.3165 |
| 1524.79444 | 110.1635 | 100.9248 | 100.4396 | 92.83614 | 99.15397 |
| 1525.75889 | 110.3211 | 100.846  | 99.62969 | 91.95023 | 98.55288 |
| 1526.72334 | 110.1537 | 100.3286 | 99.1562  | 91.97665 | 98.95361 |
| 1527.68779 | 109.5986 | 99.8307  | 99.18162 | 91.93587 | 98.20886 |
| 1528.65224 | 109.3212 | 99.19695 | 98.23619 | 91.71244 | 98.36068 |
| 1529.61669 | 109.2913 | 98.7388  | 97.42772 | 91.82782 | 99.25111 |
| 1530.58113 | 109.1982 | 98.76677 | 97.75908 | 92.15968 | 99.38174 |
| 1531.54558 | 109.5357 | 99.50423 | 98.63007 | 92.138   | 98.93726 |
| 1532.51003 | 109.812  | 100.4654 | 100.2659 | 92.50971 | 98.47997 |
| 1533.47448 | 109.5064 | 101.0563 | 101.4865 | 92.4762  | 96.71944 |
| 1534.43893 | 109.7277 | 100.3176 | 99.10652 | 91.60029 | 97.86907 |
| 1535.40338 | 109.3987 | 99.55661 | 98.26418 | 91.98984 | 98.83387 |
| 1536.36783 | 109.5861 | 99.67217 | 98.22147 | 92.27394 | 99.4788  |
| 1537.33228 | 110.0187 | 100.5443 | 99.56687 | 92.85932 | 99.70811 |
| 1538.29673 | 110.3855 | 102.2847 | 103.1119 | 93.82657 | 98.50514 |
| 1539.26118 | 111.4481 | 105.5618 | 108.3745 | 93.52012 | 94.9324  |
| 1540.22563 | 112.7285 | 105.5231 | 105.3302 | 91.91003 | 96.72814 |

|            |          |          |          |          |          |
|------------|----------|----------|----------|----------|----------|
| 1541.19008 | 111.7557 | 104.2349 | 103.8189 | 92.61713 | 97.7703  |
| 1542.15453 | 110.8713 | 103.459  | 102.6841 | 92.48031 | 97.33943 |
| 1543.11898 | 110.9312 | 102.8017 | 101.039  | 91.97565 | 98.50756 |
| 1544.08343 | 110.2493 | 102.0703 | 101.0293 | 92.46045 | 98.72313 |
| 1545.04788 | 109.5165 | 101.4315 | 100.5313 | 92.33235 | 98.00312 |
| 1546.01232 | 109.8917 | 100.8571 | 98.74473 | 92.23176 | 99.8516  |
| 1546.97677 | 109.8725 | 100.5144 | 98.32606 | 92.90727 | 101.163  |
| 1547.94122 | 110.0575 | 100.8009 | 98.5963  | 93.2596  | 101.7073 |
| 1548.90567 | 110.0346 | 101.3446 | 99.80084 | 93.58778 | 101.3304 |
| 1549.87012 | 109.8362 | 101.8443 | 100.585  | 93.33216 | 100.0355 |
| 1550.83457 | 110.3296 | 101.7844 | 99.27243 | 93.00141 | 101.4082 |
| 1551.79902 | 110.5046 | 101.8623 | 99.02214 | 93.53169 | 102.5838 |
| 1552.76347 | 110.7262 | 102.5443 | 99.84677 | 93.93568 | 102.8339 |
| 1553.72792 | 110.4222 | 103.2343 | 101.5586 | 94.32291 | 101.5303 |
| 1554.69237 | 110.9535 | 103.6737 | 101.069  | 93.3582  | 101.2335 |
| 1555.65682 | 111.6826 | 103.7371 | 100.5291 | 93.60425 | 103.2063 |
| 1556.62127 | 111.8939 | 104.5225 | 102.3323 | 94.75576 | 103.4476 |
| 1557.58572 | 112.5518 | 107.217  | 106.952  | 95.81947 | 101.4504 |
| 1558.55017 | 115.2601 | 113.2267 | 113.2334 | 94.44016 | 97.82872 |
| 1559.51462 | 112.8529 | 109.7946 | 109.4484 | 94.11648 | 97.52125 |
| 1560.47906 | 111.9123 | 105.6023 | 102.0882 | 93.46016 | 101.7596 |
| 1561.44351 | 111.7911 | 104.334  | 100.3386 | 94.16342 | 104.5364 |
| 1562.40796 | 111.5702 | 103.8662 | 99.97733 | 94.85424 | 105.5153 |
| 1563.37241 | 111.7059 | 104.2012 | 100.3461 | 95.30365 | 105.9885 |
| 1564.33686 | 111.7258 | 104.8032 | 101.3909 | 95.69023 | 105.5025 |
| 1565.30131 | 112.1408 | 105.0673 | 101.1192 | 95.5476  | 105.9462 |
| 1566.26576 | 112.3032 | 104.8175 | 100.4625 | 95.84563 | 107.2152 |
| 1567.23021 | 112.631  | 105.3177 | 100.8222 | 96.3498  | 108.0021 |
| 1568.19466 | 112.9624 | 106.4695 | 102.4233 | 96.94966 | 107.8816 |
| 1569.15911 | 112.8759 | 107.9458 | 104.8229 | 97.28246 | 105.9665 |
| 1570.12356 | 113.3205 | 107.8093 | 102.9822 | 96.44733 | 107.0817 |
| 1571.08801 | 113.3135 | 106.8805 | 101.5597 | 96.9306  | 109.0601 |
| 1572.05246 | 113.2164 | 106.6613 | 101.4466 | 97.50248 | 109.6991 |
| 1573.01691 | 113.4939 | 107.0589 | 101.6593 | 97.78399 | 110.1688 |
| 1573.98136 | 114.1364 | 107.9052 | 102.2673 | 98.11686 | 110.7638 |
| 1574.94581 | 114.5222 | 109.0614 | 104.1895 | 98.89503 | 110.487  |
| 1575.91025 | 114.1994 | 110.4055 | 106.6204 | 99.23483 | 108.2354 |
| 1576.8747  | 114.7952 | 110.498  | 104.5141 | 98.04215 | 109.5272 |
| 1577.83915 | 114.6024 | 109.36   | 103.0701 | 98.56027 | 111.3332 |
| 1578.8036  | 114.429  | 108.8332 | 102.5428 | 99.10915 | 112.2108 |
| 1579.76805 | 114.5327 | 108.8494 | 102.5245 | 99.50408 | 112.7523 |
| 1580.7325  | 114.7251 | 109.0574 | 102.6431 | 99.76156 | 113.1583 |
| 1581.69695 | 114.8703 | 109.3646 | 102.7948 | 99.97186 | 113.4457 |
| 1582.6614  | 115.026  | 109.7397 | 102.9578 | 100.1816 | 113.764  |
| 1583.62585 | 115.2377 | 110.0921 | 103.1321 | 100.4236 | 114.1161 |
| 1584.5903  | 115.555  | 110.3842 | 103.3079 | 100.6941 | 114.5059 |
| 1585.55475 | 115.76   | 110.5886 | 103.4637 | 100.9092 | 114.8018 |
| 1586.5192  | 115.8391 | 110.7929 | 103.5557 | 101.055  | 115.0232 |
| 1587.48365 | 115.8485 | 110.9636 | 103.6115 | 101.144  | 115.1639 |
| 1588.4481  | 115.8784 | 111.1564 | 103.7304 | 101.1977 | 115.2585 |
| 1589.41254 | 115.9425 | 111.4046 | 103.9439 | 101.2775 | 115.256  |
| 1590.377   | 116.1846 | 111.6588 | 104.052  | 101.3581 | 115.4559 |
| 1591.34144 | 116.3696 | 111.7513 | 104.1352 | 101.5172 | 115.6649 |
| 1592.30589 | 116.5587 | 111.8668 | 104.1371 | 101.6013 | 115.9263 |



|            |          |          |          |          |          |
|------------|----------|----------|----------|----------|----------|
| 1593.27034 | 116.568  | 112.0027 | 104.3148 | 101.6828 | 115.9365 |
| 1594.23479 | 116.5135 | 112.27   | 104.6195 | 101.6681 | 115.6276 |
| 1595.19924 | 116.5369 | 112.2556 | 104.5106 | 101.5889 | 115.731  |
| 1596.16369 | 116.5653 | 112.1264 | 104.4442 | 101.735  | 115.9625 |
| 1597.12814 | 116.7096 | 112.1401 | 104.4297 | 101.8921 | 116.2972 |
| 1598.09259 | 116.7679 | 112.1434 | 104.4394 | 102.027  | 116.5492 |
| 1599.05704 | 116.7755 | 112.1965 | 104.4333 | 102.0362 | 116.584  |
| 1600.02149 | 116.7157 | 112.214  | 104.497  | 102.0076 | 116.4662 |
| 1600.98594 | 116.7417 | 112.3346 | 104.6747 | 101.9707 | 116.319  |
| 1601.95039 | 116.8609 | 112.3945 | 104.8121 | 101.9534 | 116.3185 |
| 1602.91484 | 116.9484 | 112.5417 | 105.0186 | 101.9804 | 116.1427 |
| 1603.87929 | 117.095  | 112.6092 | 104.8321 | 101.9632 | 116.377  |
| 1604.84373 | 117.0484 | 112.4023 | 104.6027 | 102.0054 | 116.6389 |
| 1605.80818 | 116.9076 | 112.3234 | 104.7481 | 102.0114 | 116.4697 |
| 1606.77263 | 116.7715 | 112.4342 | 105.043  | 101.9243 | 116.0027 |
| 1607.73708 | 116.9099 | 112.5211 | 104.958  | 101.7852 | 116.1535 |
| 1608.70153 | 116.8289 | 112.5083 | 105.2092 | 101.9186 | 115.9845 |
| 1609.66598 | 116.9496 | 112.7265 | 105.2832 | 101.7874 | 115.7902 |
| 1610.63043 | 116.9602 | 112.4672 | 104.7204 | 101.683  | 116.2014 |
| 1611.59488 | 116.7646 | 112.1787 | 104.5353 | 101.7372 | 116.2041 |
| 1612.55933 | 116.6445 | 112.0298 | 104.463  | 101.6154 | 116.0729 |
| 1613.52378 | 116.696  | 112.0876 | 104.5639 | 101.554  | 116.0389 |
| 1614.48823 | 117.1655 | 112.6021 | 105.0725 | 101.615  | 116.2192 |
| 1615.45268 | 117.4    | 113.4199 | 106.9087 | 102.226  | 115.614  |
| 1616.41713 | 117.0106 | 114.3178 | 109.2567 | 102.4433 | 113.211  |
| 1617.38158 | 117.4411 | 113.8844 | 106.7383 | 100.6963 | 114.1065 |
| 1618.34603 | 116.9267 | 112.4064 | 105.1206 | 100.8104 | 115.2434 |
| 1619.31048 | 116.4004 | 111.5973 | 104.5986 | 100.9883 | 115.2657 |
| 1620.27492 | 116.2785 | 111.356  | 104.4176 | 100.8328 | 115.1397 |
| 1621.23937 | 116.5528 | 111.541  | 104.6351 | 100.6833 | 115.0998 |
| 1622.20382 | 116.6947 | 112.1087 | 105.9123 | 100.8675 | 114.3599 |
| 1623.16827 | 116.3268 | 112.6062 | 107.1538 | 100.616  | 112.4142 |
| 1624.13272 | 116.3273 | 111.8082 | 105.0954 | 99.44487 | 113.1814 |
| 1625.09717 | 115.9488 | 110.7119 | 103.9504 | 99.57284 | 114.1679 |
| 1626.06162 | 115.8018 | 110.3551 | 103.9922 | 99.79489 | 114.3565 |
| 1627.02607 | 115.5535 | 110.4335 | 104.9838 | 100.022  | 113.4642 |
| 1627.99052 | 115.5874 | 110.5651 | 104.9783 | 99.41002 | 112.6588 |
| 1628.95497 | 115.5401 | 109.8396 | 103.6688 | 98.98124 | 113.3638 |
| 1629.91942 | 115.1148 | 109.1989 | 103.1933 | 99.05116 | 113.4253 |
| 1630.88387 | 114.9581 | 108.9314 | 103.0164 | 98.89428 | 113.2174 |
| 1631.84832 | 115.0065 | 108.7863 | 102.9942 | 98.74506 | 113.0512 |
| 1632.81277 | 115.4165 | 109.0645 | 103.2691 | 98.70583 | 113.1981 |
| 1633.77722 | 115.8529 | 109.7553 | 104.6457 | 99.13598 | 113.0308 |
| 1634.74167 | 115.6479 | 110.8644 | 107.8204 | 99.99123 | 110.7087 |
| 1635.70612 | 116.3671 | 112.0674 | 107.7292 | 98.02215 | 108.9937 |
| 1636.67056 | 115.9426 | 110.6571 | 105.7458 | 97.72341 | 110.3064 |
| 1637.63501 | 115.1221 | 109.2421 | 104.5551 | 97.83741 | 110.2711 |
| 1638.59946 | 114.9198 | 108.1485 | 102.9884 | 97.66546 | 111.2734 |
| 1639.56391 | 114.4322 | 107.5355 | 102.655  | 97.95739 | 111.3313 |
| 1640.52836 | 114.3055 | 107.4688 | 102.4769 | 97.88278 | 111.1625 |
| 1641.49281 | 114.2487 | 107.4036 | 102.4734 | 97.94783 | 111.0999 |
| 1642.45726 | 114.4068 | 107.4403 | 102.5657 | 98.00599 | 111.1059 |
| 1643.42171 | 114.8217 | 107.5695 | 102.7014 | 98.14312 | 111.4313 |
| 1644.38616 | 115.3145 | 108.154  | 103.6972 | 98.52526 | 111.55   |

|            |          |          |          |          |          |
|------------|----------|----------|----------|----------|----------|
| 1645.35061 | 115.3695 | 109.1856 | 106.0017 | 99.07282 | 110.0126 |
| 1646.31506 | 115.9278 | 110.7873 | 107.3397 | 97.99323 | 108.1196 |
| 1647.27951 | 115.2097 | 110.299  | 107.0459 | 97.51886 | 107.324  |
| 1648.24396 | 114.866  | 109.0024 | 104.9409 | 97.22206 | 108.0705 |
| 1649.20841 | 115.0772 | 107.9727 | 103.2272 | 97.50251 | 109.8923 |
| 1650.17286 | 115.4394 | 107.9842 | 103.3749 | 98.09007 | 110.6415 |
| 1651.1373  | 115.8921 | 108.8509 | 105.1701 | 98.86063 | 110.5468 |
| 1652.10175 | 116.0211 | 110.3332 | 109.405  | 100.1928 | 108.4792 |
| 1653.0662  | 116.1811 | 112.3526 | 113.7938 | 97.89038 | 101.9555 |
| 1654.03065 | 115.1211 | 109.6723 | 107.1371 | 95.96873 | 104.0894 |
| 1654.9951  | 114.8321 | 107.6739 | 103.4474 | 96.48951 | 107.5681 |
| 1655.95955 | 114.4087 | 106.6187 | 102.4164 | 97.26836 | 108.9366 |
| 1656.924   | 114.0162 | 105.9772 | 102.0432 | 97.58324 | 109.0495 |
| 1657.88845 | 113.8557 | 105.563  | 101.7039 | 97.55904 | 109.0654 |
| 1658.8529  | 113.691  | 105.2859 | 101.522  | 97.54375 | 108.9897 |
| 1659.81735 | 113.7553 | 105.3085 | 101.5755 | 97.50955 | 108.9285 |
| 1660.7818  | 114.0947 | 105.7063 | 102.1168 | 97.55062 | 108.817  |
| 1661.74625 | 114.1312 | 106.2826 | 103.3638 | 97.81791 | 107.9723 |
| 1662.7107  | 113.8122 | 106.4363 | 103.6577 | 97.47182 | 106.4382 |
| 1663.67515 | 113.9488 | 105.6646 | 101.8783 | 96.76967 | 107.3609 |
| 1664.6396  | 113.5218 | 104.759  | 101.3123 | 97.11989 | 107.8689 |
| 1665.60405 | 113.4206 | 104.4769 | 101.1029 | 97.11084 | 107.8024 |
| 1666.56849 | 113.6404 | 104.6382 | 101.2687 | 97.04942 | 107.7259 |
| 1667.53294 | 113.9756 | 105.2569 | 102.3622 | 97.18459 | 107.2675 |
| 1668.49739 | 113.6922 | 105.7781 | 104.4472 | 97.43946 | 105.1715 |
| 1669.46184 | 114.1866 | 105.9045 | 103.5997 | 96.11412 | 104.3706 |
| 1670.42629 | 113.9177 | 105.1615 | 102.5083 | 96.01931 | 105.2042 |
| 1671.39074 | 113.2026 | 104.5614 | 102.1977 | 96.08774 | 104.4045 |
| 1672.35519 | 113.2625 | 104.0431 | 100.8897 | 95.67789 | 105.0107 |
| 1673.31964 | 113.3829 | 103.8707 | 100.9454 | 96.09688 | 105.8165 |
| 1674.28409 | 112.9278 | 103.9106 | 102.5403 | 96.84044 | 104.868  |
| 1675.24854 | 112.2379 | 103.6627 | 102.8233 | 96.16766 | 102.2278 |
| 1676.21299 | 112.6432 | 103.0084 | 100.3379 | 94.88429 | 103.3463 |
| 1677.17744 | 112.3899 | 102.3519 | 99.93597 | 95.37156 | 104.0219 |
| 1678.14189 | 112.3106 | 102.0534 | 99.89306 | 95.45115 | 103.885  |
| 1679.10634 | 112.0838 | 102.0254 | 100.5929 | 95.45959 | 102.8824 |
| 1680.07078 | 111.8747 | 102.0482 | 100.9528 | 94.92267 | 101.0917 |
| 1681.03523 | 112.2872 | 101.9065 | 100.128  | 94.32099 | 101.3394 |
| 1681.99968 | 112.3835 | 102.0777 | 100.836  | 94.74268 | 101.5347 |
| 1682.96413 | 112.4211 | 103.3997 | 103.8497 | 95.30865 | 99.54049 |
| 1683.92858 | 111.6164 | 104.3887 | 107.5237 | 94.07609 | 93.37686 |
| 1684.89303 | 109.9763 | 99.99973 | 101.1499 | 91.09402 | 92.62234 |
| 1685.85748 | 110.1793 | 98.46351 | 98.17692 | 91.25273 | 95.7811  |
| 1686.82193 | 109.6405 | 97.5606  | 97.90489 | 91.8284  | 96.18548 |
| 1687.78638 | 108.9169 | 96.89937 | 97.87151 | 91.61223 | 94.80546 |
| 1688.75083 | 108.5118 | 96.33846 | 97.39655 | 90.82883 | 93.56333 |
| 1689.71528 | 107.9078 | 95.39098 | 96.84379 | 90.33106 | 92.5334  |
| 1690.67973 | 107.4152 | 94.34646 | 95.82295 | 89.65344 | 91.79878 |
| 1691.64418 | 106.8832 | 93.43099 | 95.07404 | 89.31626 | 91.46848 |
| 1692.60863 | 106.5337 | 92.95615 | 94.91745 | 89.02719 | 90.77024 |
| 1693.57308 | 106.5864 | 92.98579 | 95.25142 | 88.67446 | 90.28211 |
| 1694.53753 | 106.3455 | 93.22895 | 97.06442 | 89.04425 | 89.38564 |
| 1695.50197 | 105.2358 | 92.59671 | 98.68343 | 88.60562 | 85.86776 |
| 1696.46642 | 105.6082 | 92.21642 | 96.07961 | 85.87987 | 84.46502 |

|            |          |          |          |          |          |
|------------|----------|----------|----------|----------|----------|
| 1697.43087 | 105.7591 | 92.09664 | 95.40191 | 86.05416 | 85.71233 |
| 1698.39532 | 105.7558 | 92.12161 | 96.03232 | 86.52332 | 86.1655  |
| 1699.35977 | 104.9308 | 92.04884 | 98.72922 | 87.49791 | 84.76492 |
| 1700.32422 | 102.4446 | 89.2531  | 96.84219 | 84.46083 | 78.2152  |
| 1701.28867 | 102.9521 | 87.99998 | 91.69407 | 82.34969 | 80.97234 |
| 1702.25312 | 102.7603 | 87.60074 | 91.72865 | 83.1049  | 82.42771 |
| 1703.21757 | 102.0475 | 86.9159  | 92.10295 | 83.34783 | 82.13188 |
| 1704.18202 | 101.424  | 86.3385  | 92.08805 | 82.59343 | 80.56128 |
| 1705.14647 | 100.95   | 85.7308  | 91.49817 | 81.42881 | 79.52012 |
| 1706.11092 | 99.67284 | 84.54159 | 90.91551 | 80.72794 | 77.89366 |
| 1707.07537 | 98.72585 | 82.9451  | 88.60226 | 79.15006 | 76.89956 |
| 1708.03982 | 98.09825 | 81.79683 | 87.53208 | 78.66389 | 76.97667 |
| 1709.00427 | 97.302   | 80.85245 | 87.26974 | 78.21003 | 76.13474 |
| 1709.96872 | 96.43713 | 79.77751 | 86.6847  | 77.12742 | 74.44205 |
| 1710.93316 | 95.65071 | 78.38469 | 85.28568 | 75.68808 | 73.23831 |
| 1711.89761 | 94.83249 | 77.25254 | 84.63325 | 74.85243 | 72.43201 |
| 1712.86206 | 94.0544  | 76.52284 | 84.61058 | 73.97999 | 71.16537 |
| 1713.82651 | 93.17126 | 75.94375 | 85.06652 | 73.03828 | 69.30447 |
| 1714.79096 | 92.33701 | 74.87733 | 84.11725 | 71.09105 | 66.75702 |
| 1715.75541 | 92.00258 | 73.78938 | 82.9117  | 69.46905 | 66.00265 |
| 1716.71986 | 90.99614 | 72.89064 | 83.84925 | 69.4078  | 64.92874 |
| 1717.68431 | 88.66805 | 70.80019 | 82.43218 | 67.11102 | 60.90542 |
| 1718.64876 | 86.78813 | 67.55903 | 77.10188 | 63.60322 | 59.26186 |
| 1719.61321 | 86.04349 | 65.81478 | 75.3928  | 62.94655 | 59.86821 |
| 1720.57766 | 84.98814 | 64.23855 | 74.7151  | 62.25858 | 59.2057  |
| 1721.54211 | 83.69038 | 62.45212 | 73.54544 | 60.73256 | 57.65438 |
| 1722.50656 | 82.06351 | 60.48968 | 72.30044 | 58.96287 | 55.72335 |
| 1723.47101 | 80.10212 | 58.21214 | 70.31611 | 56.63    | 53.2873  |
| 1724.43546 | 78.31765 | 55.88498 | 68.17814 | 54.30268 | 51.34637 |
| 1725.39991 | 76.60942 | 53.7098  | 66.67633 | 52.51458 | 49.54015 |
| 1726.36435 | 74.9037  | 51.59008 | 65.07028 | 50.51419 | 47.54345 |
| 1727.3288  | 73.28299 | 49.64983 | 63.55628 | 48.6002  | 45.61048 |
| 1728.29325 | 71.90277 | 48.04113 | 62.69785 | 47.0181  | 44.00474 |
| 1729.2577  | 70.40738 | 46.52531 | 62.22095 | 45.74919 | 42.08302 |
| 1730.22215 | 69.10403 | 45.05386 | 59.98098 | 43.57625 | 40.13104 |
| 1731.1866  | 68.55419 | 44.11392 | 59.20739 | 42.57547 | 39.58032 |
| 1732.15105 | 68.34398 | 43.7018  | 60.49651 | 42.65717 | 39.08527 |
| 1733.1155  | 67.80721 | 43.21806 | 61.92348 | 42.40724 | 37.52747 |
| 1734.07995 | 67.0855  | 42.89508 | 59.38072 | 41.0421  | 35.91762 |
| 1735.0444  | 68.04219 | 43.5255  | 56.9343  | 41.08108 | 38.00093 |
| 1736.00885 | 69.01436 | 44.09905 | 58.55627 | 42.65635 | 39.8357  |
| 1736.9733  | 70.0091  | 44.88149 | 60.06876 | 44.05591 | 41.00263 |
| 1737.93775 | 71.72128 | 46.49055 | 61.80781 | 45.46303 | 42.65935 |
| 1738.9022  | 73.08954 | 48.11119 | 64.31215 | 47.42027 | 43.974   |
| 1739.86665 | 75.63378 | 51.21144 | 65.47322 | 49.68758 | 46.60183 |
| 1740.8311  | 78.65083 | 54.19611 | 66.77276 | 52.14408 | 50.80112 |
| 1741.79554 | 80.82044 | 56.51116 | 69.76442 | 55.10501 | 53.99967 |
| 1742.75999 | 83.43785 | 59.84005 | 72.99805 | 58.34667 | 57.073   |
| 1743.72444 | 87.34256 | 64.70939 | 75.64853 | 62.07482 | 62.13304 |
| 1744.68889 | 90.56701 | 68.66608 | 78.18475 | 65.80272 | 67.31169 |
| 1745.65334 | 93.51241 | 72.66783 | 81.36757 | 69.63101 | 71.99694 |
| 1746.61779 | 96.56001 | 77.18812 | 84.78986 | 73.36881 | 76.45279 |
| 1747.58224 | 99.62859 | 81.98459 | 88.26443 | 77.05417 | 80.89067 |
| 1748.54669 | 102.5397 | 86.57349 | 91.04331 | 80.51036 | 85.1539  |

|            |          |          |          |          |          |
|------------|----------|----------|----------|----------|----------|
| 1749.51114 | 105.4768 | 90.65976 | 92.93199 | 83.59953 | 90.28763 |
| 1750.47559 | 106.2232 | 92.76104 | 95.22591 | 86.41838 | 92.65194 |
| 1751.44004 | 108.0346 | 96.09962 | 96.56423 | 88.81229 | 95.79032 |
| 1752.40449 | 109.8854 | 98.32506 | 96.81224 | 90.71397 | 100.113  |
| 1753.36894 | 110.8437 | 99.76449 | 97.80673 | 92.68409 | 102.6616 |
| 1754.33339 | 112.1204 | 101.6094 | 98.80277 | 94.17129 | 104.9102 |
| 1755.29784 | 113.0991 | 103.4603 | 100.2421 | 95.60504 | 106.4869 |
| 1756.26229 | 113.43   | 104.9704 | 101.8336 | 96.71515 | 106.7373 |
| 1757.22673 | 114.3955 | 106.4706 | 102.168  | 97.12752 | 108.02   |
| 1758.19118 | 114.931  | 107.0174 | 102.0541 | 97.75654 | 109.6915 |
| 1759.15563 | 115.5055 | 107.8589 | 102.5114 | 98.66971 | 110.9628 |
| 1760.12008 | 116.2046 | 108.9331 | 103.4243 | 99.46111 | 112.0246 |
| 1761.08453 | 116.1574 | 109.9093 | 105.2688 | 100.4353 | 111.4394 |
| 1762.04898 | 116.6595 | 110.8274 | 105.282  | 100.117  | 111.6704 |
| 1763.01343 | 117.057  | 110.7807 | 104.2821 | 100.2981 | 113.4858 |
| 1763.97788 | 116.9306 | 110.624  | 104.1832 | 100.9219 | 114.1646 |
| 1764.94233 | 117.1553 | 111.0283 | 104.3554 | 101.3122 | 114.6694 |
| 1765.90678 | 117.7065 | 111.6237 | 104.6378 | 101.5364 | 115.3179 |
| 1766.87123 | 117.8833 | 112.1455 | 105.5016 | 101.9893 | 115.3151 |
| 1767.83568 | 117.6523 | 112.6614 | 106.3951 | 102.1394 | 114.3105 |
| 1768.80013 | 118.6061 | 113.4135 | 105.8051 | 101.6936 | 115.5392 |
| 1769.76458 | 118.8448 | 113.5353 | 106.0876 | 102.2749 | 116.4396 |
| 1770.72903 | 119.0167 | 114.6273 | 107.9366 | 103.0182 | 115.7194 |
| 1771.69347 | 119.2956 | 116.1792 | 110.0223 | 103.1602 | 114.3989 |
| 1772.65792 | 119.3201 | 116.3152 | 109.4372 | 102.8178 | 114.5789 |
| 1773.62237 | 119.7053 | 115.3519 | 107.1572 | 102.5065 | 116.9461 |
| 1774.58682 | 119.1305 | 114.5853 | 107.0207 | 103.1998 | 117.2234 |
| 1775.55127 | 118.8709 | 114.5543 | 107.0678 | 103.2375 | 116.8292 |
| 1776.51572 | 119.2238 | 114.5153 | 106.462  | 103.1389 | 117.6582 |
| 1777.48017 | 119.2571 | 114.3005 | 106.3096 | 103.4348 | 118.1845 |
| 1778.44462 | 119.418  | 114.6317 | 106.6617 | 103.6037 | 118.2207 |
| 1779.40907 | 119.4911 | 115.051  | 107.2318 | 103.7211 | 117.9805 |
| 1780.37352 | 119.2971 | 115.4494 | 107.8333 | 103.8001 | 117.3689 |
| 1781.33797 | 119.5289 | 115.4346 | 107.1767 | 103.4428 | 118.031  |
| 1782.30242 | 119.6824 | 115.1601 | 106.7638 | 103.7502 | 118.8814 |
| 1783.26687 | 119.7735 | 115.1761 | 106.9123 | 104.0416 | 119.1135 |
| 1784.23132 | 119.4316 | 115.2624 | 107.471  | 104.2643 | 118.5005 |
| 1785.19576 | 119.5294 | 115.5237 | 107.2773 | 103.9069 | 118.4787 |
| 1786.16022 | 119.7685 | 115.4573 | 106.8656 | 103.9611 | 119.249  |
| 1787.12466 | 119.805  | 115.372  | 106.8936 | 104.2134 | 119.4768 |
| 1788.08911 | 119.9823 | 115.5642 | 107.0455 | 104.3422 | 119.6386 |
| 1789.05356 | 120.2162 | 115.9134 | 107.3048 | 104.4354 | 119.8176 |
| 1790.01801 | 120.3119 | 116.4585 | 108.1688 | 104.6874 | 119.4084 |
| 1790.98246 | 120.7421 | 117.4486 | 109.3123 | 104.6739 | 118.8823 |
| 1791.94691 | 120.5081 | 117.8029 | 110.332  | 104.8515 | 118.0848 |
| 1792.91136 | 120.6629 | 117.8132 | 109.5515 | 104.3696 | 118.3938 |
| 1793.87581 | 120.9691 | 117.1089 | 108.0588 | 104.2482 | 120.0431 |
| 1794.84026 | 120.4608 | 116.5443 | 108.1867 | 104.7604 | 119.8126 |
| 1795.80471 | 120.3553 | 116.7461 | 108.4613 | 104.6893 | 119.3064 |
| 1796.76916 | 120.5901 | 116.7419 | 107.9853 | 104.5643 | 119.9186 |
| 1797.73361 | 120.8188 | 116.6805 | 107.8114 | 104.8432 | 120.6738 |
| 1798.69806 | 120.7072 | 116.9019 | 108.6867 | 105.3002 | 120.1494 |
| 1799.66251 | 121.0776 | 117.5989 | 109.19   | 105.0935 | 119.8197 |
| 1800.62696 | 121.1247 | 117.4123 | 108.6857 | 104.8385 | 120.2424 |

|            |          |          |          |          |          |
|------------|----------|----------|----------|----------|----------|
| 1801.5914  | 120.6118 | 117.064  | 108.6646 | 105.0026 | 119.8824 |
| 1802.55585 | 120.5489 | 117.0023 | 108.2727 | 104.8197 | 120.03   |
| 1803.5203  | 120.6053 | 116.7274 | 107.7758 | 104.9251 | 120.7723 |
| 1804.48475 | 120.5685 | 116.6278 | 107.8    | 105.202  | 120.9525 |
| 1805.4492  | 120.7669 | 116.8473 | 107.9085 | 105.2973 | 121.1278 |
| 1806.41365 | 120.8163 | 116.9141 | 108.0184 | 105.344  | 121.1334 |
| 1807.3781  | 120.7933 | 117.0522 | 108.2253 | 105.3358 | 120.8429 |
| 1808.34255 | 121.0459 | 117.2265 | 108.1037 | 105.2118 | 121.1399 |
| 1809.307   | 121.0356 | 117.3054 | 108.4207 | 105.5038 | 121.2254 |
| 1810.27145 | 120.9695 | 117.7204 | 109.182  | 105.6584 | 120.5439 |
| 1811.2359  | 121.2439 | 117.8998 | 108.9533 | 105.3216 | 120.7562 |
| 1812.20035 | 121.0895 | 117.4661 | 108.4822 | 105.381  | 121.0828 |
| 1813.1648  | 121.0378 | 117.2461 | 108.1856 | 105.5175 | 121.4279 |
| 1814.12925 | 120.9552 | 117.0454 | 108.0538 | 105.6096 | 121.6155 |
| 1815.0937  | 120.9623 | 117.0465 | 108.0149 | 105.5848 | 121.6825 |
| 1816.05815 | 120.96   | 117.1017 | 108.0936 | 105.6027 | 121.6225 |
| 1817.02259 | 120.9642 | 117.2997 | 108.3089 | 105.6386 | 121.385  |
| 1817.98704 | 121.0916 | 117.3907 | 108.2546 | 105.6266 | 121.574  |
| 1818.95149 | 121.1676 | 117.3132 | 108.1684 | 105.7637 | 121.8821 |
| 1819.91594 | 121.1723 | 117.2998 | 108.1897 | 105.833  | 121.9385 |
| 1820.88039 | 121.215  | 117.4067 | 108.2593 | 105.8369 | 121.9573 |
| 1821.84484 | 121.1863 | 117.4687 | 108.3931 | 105.8579 | 121.8241 |
| 1822.80929 | 121.4862 | 117.7648 | 108.5124 | 105.8105 | 121.9728 |
| 1823.77374 | 121.606  | 117.9455 | 108.9637 | 106.0094 | 121.9529 |
| 1824.73819 | 121.2798 | 118.3123 | 110.0066 | 106.3106 | 120.805  |
| 1825.70264 | 121.78   | 118.7227 | 109.4336 | 105.6672 | 121.2366 |
| 1826.66709 | 121.9381 | 118.2935 | 108.6605 | 105.7448 | 122.3122 |
| 1827.63154 | 122.0058 | 118.2885 | 108.9339 | 106.1042 | 122.4548 |
| 1828.59599 | 121.9588 | 118.8374 | 110.2512 | 106.4417 | 121.5564 |
| 1829.56044 | 121.6851 | 119.5461 | 111.4829 | 106.2587 | 119.959  |
| 1830.52489 | 122.0027 | 119.265  | 109.9007 | 105.4786 | 121.0716 |
| 1831.48934 | 121.7914 | 118.2831 | 108.7489 | 105.7144 | 122.1493 |
| 1832.45378 | 121.4697 | 117.8129 | 108.6417 | 106.0518 | 122.1859 |
| 1833.41823 | 121.4365 | 117.7379 | 108.6196 | 106.0523 | 122.1687 |
| 1834.38268 | 121.5474 | 117.7832 | 108.5598 | 106.0779 | 122.3848 |
| 1835.34713 | 121.6357 | 117.8806 | 108.6647 | 106.1621 | 122.4743 |
| 1836.31158 | 121.5983 | 118.0531 | 109.037  | 106.2683 | 122.1938 |
| 1837.27603 | 121.6469 | 118.2449 | 109.1646 | 106.1806 | 122.0083 |
| 1838.24048 | 121.7083 | 118.1258 | 108.7854 | 106.0973 | 122.4315 |
| 1839.20493 | 121.6121 | 117.9659 | 108.6774 | 106.2142 | 122.5641 |
| 1840.16938 | 121.7087 | 118.0134 | 108.6898 | 106.2183 | 122.6481 |
| 1841.13383 | 121.7652 | 118.1225 | 108.8912 | 106.2625 | 122.5553 |
| 1842.09828 | 122.2414 | 118.6812 | 109.3099 | 106.2763 | 122.6876 |
| 1843.06273 | 122.1515 | 119.0215 | 110.4819 | 106.7104 | 122.0001 |
| 1844.02718 | 121.8565 | 119.7039 | 111.6318 | 106.6632 | 120.4534 |
| 1844.99163 | 122.5404 | 119.8115 | 110.1112 | 105.6125 | 121.6572 |
| 1845.95608 | 122.3223 | 118.9113 | 109.3206 | 105.9569 | 122.5629 |
| 1846.92052 | 121.8609 | 118.4972 | 109.4317 | 106.3203 | 122.2675 |
| 1847.88497 | 121.7639 | 118.5869 | 109.4786 | 106.2128 | 121.9945 |
| 1848.84942 | 121.8971 | 118.4188 | 109.0078 | 106.1546 | 122.5984 |
| 1849.81387 | 121.8925 | 118.2006 | 108.893  | 106.4287 | 122.9595 |
| 1850.77832 | 121.9575 | 118.1991 | 108.9025 | 106.4989 | 123.06   |
| 1851.74277 | 121.9405 | 118.1761 | 108.9216 | 106.5137 | 123.013  |
| 1852.70722 | 121.9107 | 118.1182 | 108.8515 | 106.4519 | 122.9661 |

|            |          |          |          |          |          |
|------------|----------|----------|----------|----------|----------|
| 1853.67167 | 121.8737 | 118.0766 | 108.8173 | 106.4388 | 122.9609 |
| 1854.63612 | 121.8989 | 118.1112 | 108.8037 | 106.4251 | 123.0034 |
| 1855.60057 | 121.9405 | 118.1974 | 108.8609 | 106.4658 | 123.0425 |
| 1856.56502 | 122.0119 | 118.3018 | 108.9116 | 106.4812 | 123.1033 |
| 1857.52947 | 121.9939 | 118.3628 | 109.056  | 106.5584 | 123.0404 |
| 1858.49392 | 122.034  | 118.4192 | 109.1357 | 106.506  | 122.9797 |
| 1859.45837 | 122.0779 | 118.3621 | 109.074  | 106.473  | 123.0971 |
| 1860.42281 | 121.9746 | 118.2464 | 109.0335 | 106.4761 | 123.0741 |
| 1861.38727 | 121.9317 | 118.2536 | 109.0278 | 106.4485 | 122.9925 |
| 1862.35171 | 122.0197 | 118.2704 | 108.9556 | 106.4309 | 123.1176 |
| 1863.31616 | 122.1013 | 118.3071 | 108.9927 | 106.511  | 123.2143 |
| 1864.28061 | 122.2874 | 118.4557 | 109.0726 | 106.5392 | 123.3294 |
| 1865.24506 | 122.4467 | 118.7132 | 109.4328 | 106.6459 | 123.2506 |
| 1866.20951 | 122.6534 | 119.198  | 110.0284 | 106.6681 | 122.949  |
| 1867.17396 | 122.8529 | 119.7085 | 110.6984 | 106.6965 | 122.6362 |
| 1868.13841 | 122.7256 | 119.9836 | 111.4133 | 106.7195 | 121.9308 |
| 1869.10286 | 122.5638 | 120.0057 | 111.3647 | 106.5401 | 121.6221 |
| 1870.06731 | 122.7158 | 119.5533 | 110.1462 | 106.2424 | 122.652  |
| 1871.03176 | 122.5073 | 118.8818 | 109.4994 | 106.5006 | 123.2482 |
| 1871.99621 | 122.3797 | 118.6091 | 109.2787 | 106.683  | 123.4677 |
| 1872.96066 | 122.2996 | 118.5222 | 109.2099 | 106.7218 | 123.5164 |
| 1873.92511 | 122.27   | 118.4959 | 109.1764 | 106.6963 | 123.5065 |
| 1874.88956 | 122.2674 | 118.4595 | 109.1759 | 106.6942 | 123.5277 |
| 1875.854   | 122.311  | 118.4734 | 109.1905 | 106.7011 | 123.5483 |
| 1876.81846 | 122.3433 | 118.5226 | 109.2164 | 106.7371 | 123.5704 |
| 1877.7829  | 122.3432 | 118.5216 | 109.2165 | 106.7247 | 123.5699 |
| 1878.74735 | 122.2793 | 118.4825 | 109.2309 | 106.7141 | 123.4943 |
| 1879.7118  | 122.283  | 118.4994 | 109.2079 | 106.6748 | 123.4849 |
| 1880.67625 | 122.3232 | 118.5236 | 109.2225 | 106.7175 | 123.5834 |
| 1881.6407  | 122.374  | 118.5897 | 109.2552 | 106.7549 | 123.6455 |
| 1882.60515 | 122.4446 | 118.6731 | 109.3075 | 106.7864 | 123.6798 |
| 1883.5696  | 122.4888 | 118.7433 | 109.4398 | 106.8219 | 123.6042 |
| 1884.53405 | 122.4867 | 118.7624 | 109.5423 | 106.8149 | 123.5004 |
| 1885.4985  | 122.4909 | 118.6975 | 109.4198 | 106.7675 | 123.6233 |
| 1886.46295 | 122.5061 | 118.6468 | 109.3587 | 106.8428 | 123.7756 |
| 1887.4274  | 122.7385 | 118.8321 | 109.4599 | 106.8571 | 123.9519 |
| 1888.39185 | 122.6151 | 119.0016 | 110.0902 | 107.0727 | 123.4725 |
| 1889.3563  | 122.4708 | 119.4319 | 110.6599 | 106.9872 | 122.6255 |
| 1890.32075 | 122.7586 | 119.4012 | 109.9158 | 106.5625 | 123.298  |
| 1891.28519 | 122.6182 | 118.8217 | 109.4611 | 106.7762 | 123.754  |
| 1892.24964 | 122.5941 | 118.6858 | 109.4371 | 106.9171 | 123.8044 |
| 1893.21409 | 122.7024 | 118.7625 | 109.5154 | 106.9167 | 123.8701 |
| 1894.17854 | 122.637  | 118.883  | 109.8818 | 107.0058 | 123.5316 |
| 1895.14299 | 122.6348 | 119.096  | 110.0658 | 106.9121 | 123.2103 |
| 1896.10744 | 122.7416 | 119.017  | 109.6544 | 106.7807 | 123.6291 |
| 1897.07189 | 122.619  | 118.7793 | 109.4664 | 106.9298 | 123.8177 |
| 1898.03634 | 122.5979 | 118.7912 | 109.4531 | 106.9843 | 123.8502 |
| 1899.00079 | 122.5934 | 118.7654 | 109.4493 | 107.0037 | 123.8712 |
| 1899.96524 | 122.6109 | 118.7442 | 109.457  | 106.9958 | 123.8836 |
| 1900.92969 | 122.5632 | 118.7036 | 109.4841 | 107.0007 | 123.8403 |
| 1901.89414 | 122.5677 | 118.7382 | 109.508  | 106.9841 | 123.8411 |
| 1902.85859 | 122.5807 | 118.7265 | 109.5179 | 106.9899 | 123.863  |
| 1903.82304 | 122.6538 | 118.7765 | 109.5709 | 106.9969 | 123.8164 |
| 1904.78749 | 122.7443 | 118.8523 | 109.5794 | 107.0108 | 123.8638 |

|            |          |          |          |          |          |
|------------|----------|----------|----------|----------|----------|
| 1905.75194 | 122.8052 | 118.9151 | 109.5829 | 107.0663 | 124.0004 |
| 1906.71638 | 122.7507 | 118.9149 | 109.7362 | 107.1178 | 123.8837 |
| 1907.68083 | 122.7867 | 119.0811 | 109.9323 | 107.035  | 123.6684 |
| 1908.64528 | 122.8419 | 119.1521 | 110.024  | 106.997  | 123.6448 |
| 1909.60973 | 122.7617 | 119.211  | 110.2452 | 107.0869 | 123.3756 |
| 1910.57418 | 122.862  | 119.1815 | 109.9617 | 106.9543 | 123.6421 |
| 1911.53863 | 122.7794 | 118.8565 | 109.6527 | 107.0601 | 123.9727 |
| 1912.50308 | 122.7101 | 118.7527 | 109.5996 | 107.1184 | 123.9952 |
| 1913.46753 | 122.7171 | 118.7857 | 109.626  | 107.1117 | 123.9964 |
| 1914.43198 | 122.7623 | 118.8614 | 109.6412 | 107.108  | 124.0185 |
| 1915.39643 | 122.976  | 119.0609 | 109.6849 | 107.1414 | 124.2054 |
| 1916.36088 | 123.1318 | 119.2341 | 110.0064 | 107.2654 | 124.2054 |
| 1917.32533 | 122.751  | 119.3599 | 110.8198 | 107.4675 | 123.1931 |
| 1918.28978 | 122.9519 | 119.714  | 110.6473 | 106.9631 | 123.0849 |
| 1919.25423 | 123.0996 | 119.3208 | 109.8742 | 106.8606 | 123.9798 |
| 1920.21868 | 123.0214 | 119.0408 | 109.7769 | 107.1288 | 124.1927 |
| 1921.18313 | 123.102  | 119.1697 | 110.0533 | 107.2225 | 124.0971 |
| 1922.14757 | 122.9208 | 119.4463 | 110.7456 | 107.309  | 123.2868 |
| 1923.11202 | 123.0507 | 119.7619 | 110.7226 | 107.0389 | 123.1922 |
| 1924.07647 | 123.1422 | 119.4256 | 110.0442 | 107.001  | 123.9608 |
| 1925.04092 | 122.9815 | 119.0456 | 109.7773 | 107.1875 | 124.2024 |
| 1926.00537 | 122.8754 | 118.9186 | 109.734  | 107.221  | 124.163  |
| 1926.96982 | 122.8745 | 118.8818 | 109.741  | 107.2208 | 124.1909 |
| 1927.93427 | 122.8802 | 118.8341 | 109.7429 | 107.2061 | 124.1821 |
| 1928.89872 | 122.9315 | 118.8523 | 109.7616 | 107.2202 | 124.2108 |
| 1929.86317 | 122.9618 | 118.8973 | 109.7943 | 107.2612 | 124.2336 |
| 1930.82762 | 122.9712 | 118.9308 | 109.8071 | 107.2722 | 124.2805 |
| 1931.79207 | 122.9681 | 118.9573 | 109.8487 | 107.2729 | 124.268  |
| 1932.75652 | 122.9825 | 119.0008 | 109.8915 | 107.2526 | 124.2172 |
| 1933.72097 | 123.0094 | 119.0029 | 109.8842 | 107.2686 | 124.2649 |
| 1934.68542 | 123.036  | 118.9918 | 109.8733 | 107.3222 | 124.3721 |
| 1935.64987 | 123.0339 | 118.9902 | 109.8986 | 107.3444 | 124.3802 |
| 1936.61432 | 123.0631 | 119.0138 | 109.9096 | 107.3225 | 124.3924 |
| 1937.57876 | 123.0863 | 119.0083 | 109.92   | 107.3139 | 124.3859 |
| 1938.54321 | 123.1284 | 119.036  | 109.9198 | 107.3217 | 124.431  |
| 1939.50766 | 123.2209 | 119.1318 | 109.9462 | 107.3536 | 124.5284 |
| 1940.47211 | 123.4391 | 119.3427 | 110.0958 | 107.3622 | 124.6613 |
| 1941.43656 | 123.2494 | 119.4465 | 110.7481 | 107.5131 | 124.005  |
| 1942.40101 | 123.18   | 119.8301 | 111.2274 | 107.3407 | 123.2416 |
| 1943.36546 | 123.5726 | 119.8178 | 110.5002 | 107.0167 | 124.1131 |
| 1944.32991 | 123.4079 | 119.3492 | 110.2285 | 107.311  | 124.5079 |
| 1945.29436 | 123.2541 | 119.2902 | 110.3424 | 107.3923 | 124.2937 |
| 1946.25881 | 123.2485 | 119.3181 | 110.2913 | 107.3361 | 124.3208 |
| 1947.22326 | 123.274  | 119.2437 | 110.1164 | 107.3475 | 124.5327 |
| 1948.18771 | 123.263  | 119.1778 | 110.0648 | 107.4321 | 124.6394 |
| 1949.15216 | 123.2743 | 119.1797 | 110.0722 | 107.4443 | 124.6437 |
| 1950.11661 | 123.2696 | 119.1502 | 110.0593 | 107.4403 | 124.6465 |
| 1951.08106 | 123.2801 | 119.1375 | 110.0602 | 107.4405 | 124.6614 |
| 1952.04551 | 123.2898 | 119.1516 | 110.0768 | 107.453  | 124.7026 |
| 1953.00995 | 123.3101 | 119.1758 | 110.0846 | 107.4402 | 124.7176 |
| 1953.9744  | 123.2862 | 119.1979 | 110.1577 | 107.4516 | 124.6271 |
| 1954.93885 | 123.2886 | 119.2737 | 110.2227 | 107.4296 | 124.5453 |
| 1955.9033  | 123.3138 | 119.2942 | 110.1723 | 107.417  | 124.6679 |
| 1956.86775 | 123.3108 | 119.2566 | 110.1391 | 107.4434 | 124.729  |

|            |          |          |          |          |          |
|------------|----------|----------|----------|----------|----------|
| 1957.8322  | 123.3053 | 119.2126 | 110.1188 | 107.4526 | 124.7386 |
| 1958.79665 | 123.3213 | 119.2187 | 110.1345 | 107.477  | 124.7662 |
| 1959.7611  | 123.3491 | 119.2597 | 110.1958 | 107.5197 | 124.7815 |
| 1960.72555 | 123.3459 | 119.2697 | 110.2438 | 107.5159 | 124.7159 |
| 1961.69    | 123.3759 | 119.2811 | 110.2057 | 107.474  | 124.7525 |
| 1962.65445 | 123.3694 | 119.2531 | 110.1574 | 107.4853 | 124.8042 |
| 1963.6189  | 123.3983 | 119.2916 | 110.165  | 107.5058 | 124.8635 |
| 1964.58335 | 123.4633 | 119.372  | 110.2398 | 107.5209 | 124.8931 |
| 1965.5478  | 123.4766 | 119.496  | 110.4674 | 107.5467 | 124.734  |
| 1966.51224 | 123.3622 | 119.6091 | 110.791  | 107.5411 | 124.2808 |
| 1967.47669 | 123.4039 | 119.692  | 110.7281 | 107.393  | 124.247  |
| 1968.44114 | 123.4834 | 119.509  | 110.3419 | 107.3776 | 124.7355 |
| 1969.40559 | 123.4094 | 119.3107 | 110.234  | 107.5481 | 124.9027 |
| 1970.37004 | 123.3919 | 119.2921 | 110.2276 | 107.5678 | 124.8918 |
| 1971.33449 | 123.4014 | 119.3064 | 110.2308 | 107.5898 | 124.919  |
| 1972.29894 | 123.4198 | 119.3299 | 110.239  | 107.6034 | 124.9395 |
| 1973.26339 | 123.4146 | 119.3304 | 110.2379 | 107.6007 | 124.949  |
| 1974.22784 | 123.4117 | 119.335  | 110.2348 | 107.5892 | 124.9443 |
| 1975.19229 | 123.3884 | 119.3125 | 110.2269 | 107.5802 | 124.9102 |
| 1976.15674 | 123.3798 | 119.2947 | 110.2163 | 107.57   | 124.8915 |
| 1977.12119 | 123.3707 | 119.2632 | 110.2111 | 107.5833 | 124.9151 |
| 1978.08564 | 123.3631 | 119.2526 | 110.2008 | 107.5697 | 124.9033 |
| 1979.05009 | 123.3466 | 119.2613 | 110.1935 | 107.5595 | 124.8828 |
| 1980.01454 | 123.35   | 119.285  | 110.2139 | 107.5644 | 124.8927 |
| 1980.97899 | 123.3608 | 119.2923 | 110.2351 | 107.5872 | 124.9263 |
| 1981.94343 | 123.3814 | 119.2973 | 110.2516 | 107.6037 | 124.9385 |
| 1982.90788 | 123.3874 | 119.2892 | 110.2654 | 107.6318 | 124.9548 |
| 1983.87233 | 123.3762 | 119.2738 | 110.2596 | 107.6252 | 124.9456 |
| 1984.83678 | 123.382  | 119.2732 | 110.2639 | 107.6375 | 124.9575 |
| 1985.80123 | 123.4346 | 119.316  | 110.2858 | 107.6374 | 124.9929 |
| 1986.76568 | 123.4709 | 119.3647 | 110.3821 | 107.6607 | 124.975  |
| 1987.73013 | 123.4009 | 119.4449 | 110.5597 | 107.6705 | 124.7132 |
| 1988.69458 | 123.4724 | 119.5646 | 110.5219 | 107.5642 | 124.7388 |
| 1989.65903 | 123.6562 | 119.5855 | 110.4172 | 107.584  | 125.1024 |
| 1990.62348 | 123.6041 | 119.5791 | 110.7095 | 107.7725 | 124.9524 |
| 1991.58793 | 123.4303 | 119.7563 | 111.1345 | 107.7598 | 124.2634 |
| 1992.55238 | 123.61   | 119.895  | 110.8739 | 107.4768 | 124.4208 |
| 1993.51683 | 123.6332 | 119.6013 | 110.5004 | 107.5712 | 124.942  |
| 1994.48128 | 123.549  | 119.4396 | 110.432  | 107.7272 | 125.0823 |
| 1995.44573 | 123.5314 | 119.4264 | 110.4242 | 107.7431 | 125.0908 |
| 1996.41018 | 123.556  | 119.435  | 110.4219 | 107.7573 | 125.0876 |
| 1997.37462 | 123.5772 | 119.4351 | 110.441  | 107.7684 | 125.0925 |
| 1998.33907 | 123.5783 | 119.467  | 110.5088 | 107.7921 | 125.0668 |
| 1999.30352 | 123.6171 | 119.5041 | 110.5246 | 107.795  | 125.1096 |
| 2000.26797 | 123.623  | 119.4878 | 110.489  | 107.8073 | 125.1555 |
| 2001.23242 | 123.6254 | 119.4647 | 110.4747 | 107.8203 | 125.1554 |
| 2002.19687 | 123.6486 | 119.4709 | 110.494  | 107.8446 | 125.1702 |
| 2003.16132 | 123.6713 | 119.4866 | 110.5103 | 107.8491 | 125.1858 |
| 2004.12577 | 123.6803 | 119.503  | 110.5185 | 107.852  | 125.1915 |
| 2005.09022 | 123.6836 | 119.5239 | 110.525  | 107.8512 | 125.2007 |
| 2006.05467 | 123.71   | 119.5559 | 110.5612 | 107.8743 | 125.2208 |
| 2007.01912 | 123.7607 | 119.5859 | 110.6255 | 107.9021 | 125.2322 |
| 2007.98357 | 123.798  | 119.609  | 110.66   | 107.9226 | 125.2621 |
| 2008.94802 | 123.8136 | 119.6018 | 110.6521 | 107.9332 | 125.3031 |



|            |          |          |          |          |          |
|------------|----------|----------|----------|----------|----------|
| 2009.91247 | 123.8235 | 119.5973 | 110.6545 | 107.9562 | 125.3317 |
| 2010.87692 | 123.8504 | 119.6055 | 110.6508 | 107.9642 | 125.357  |
| 2011.84137 | 123.883  | 119.6277 | 110.6714 | 107.9886 | 125.3835 |
| 2012.80581 | 123.9122 | 119.6514 | 110.6731 | 107.9778 | 125.4075 |
| 2013.77026 | 123.97   | 119.6969 | 110.7012 | 107.9917 | 125.4469 |
| 2014.73471 | 124.0783 | 119.7856 | 110.7605 | 108.0058 | 125.5327 |
| 2015.69916 | 124.0436 | 119.8405 | 110.9922 | 108.0799 | 125.3556 |
| 2016.66361 | 124.0533 | 119.9838 | 111.1778 | 108.0174 | 125.0914 |
| 2017.62806 | 124.1459 | 120.0048 | 111.0544 | 107.9347 | 125.2284 |
| 2018.59251 | 124.1164 | 119.8806 | 110.9639 | 108.0069 | 125.3501 |
| 2019.55696 | 124.1416 | 119.85   | 110.8912 | 108.0451 | 125.5067 |
| 2020.52141 | 124.1559 | 119.8303 | 110.8659 | 108.1048 | 125.6108 |
| 2021.48586 | 124.1631 | 119.8313 | 110.8785 | 108.1267 | 125.6188 |
| 2022.45031 | 124.1427 | 119.8296 | 110.9124 | 108.1298 | 125.5719 |
| 2023.41476 | 124.1633 | 119.8567 | 110.9116 | 108.1105 | 125.5955 |
| 2024.37921 | 124.1934 | 119.8549 | 110.9071 | 108.1255 | 125.6613 |
| 2025.34366 | 124.2327 | 119.8704 | 110.9358 | 108.1494 | 125.6981 |
| 2026.30811 | 124.2576 | 119.8869 | 110.9651 | 108.1602 | 125.7013 |
| 2027.27256 | 124.288  | 119.906  | 110.9679 | 108.1654 | 125.7304 |
| 2028.237   | 124.3065 | 119.9138 | 110.9722 | 108.181  | 125.7664 |
| 2029.20145 | 124.3335 | 119.9435 | 111.004  | 108.2045 | 125.8002 |
| 2030.1659  | 124.3478 | 119.9573 | 111.0118 | 108.2183 | 125.8198 |
| 2031.13035 | 124.3703 | 119.9736 | 111.0163 | 108.2229 | 125.8154 |
| 2032.0948  | 124.4015 | 119.9861 | 111.0401 | 108.2381 | 125.8312 |
| 2033.05925 | 124.4312 | 120.0147 | 111.077  | 108.2607 | 125.8686 |
| 2034.0237  | 124.4311 | 120.0079 | 111.0867 | 108.259  | 125.8812 |
| 2034.98815 | 124.4435 | 120.0039 | 111.0909 | 108.2669 | 125.8871 |
| 2035.9526  | 124.4578 | 120.0107 | 111.0987 | 108.2778 | 125.9023 |
| 2036.91705 | 124.4764 | 120.0484 | 111.1319 | 108.2748 | 125.9015 |
| 2037.8815  | 124.512  | 120.0812 | 111.142  | 108.2706 | 125.9235 |
| 2038.84595 | 124.5716 | 120.1114 | 111.1419 | 108.283  | 125.9714 |
| 2039.8104  | 124.5774 | 120.1197 | 111.2114 | 108.2981 | 125.929  |
| 2040.77485 | 124.5149 | 120.1526 | 111.3354 | 108.2966 | 125.7302 |
| 2041.7393  | 124.5713 | 120.199  | 111.2887 | 108.2221 | 125.7715 |
| 2042.70374 | 124.6027 | 120.1462 | 111.2155 | 108.2789 | 125.9494 |
| 2043.66819 | 124.6021 | 120.1336 | 111.2347 | 108.3495 | 125.9638 |
| 2044.63264 | 124.6381 | 120.1583 | 111.2376 | 108.3639 | 126.0078 |
| 2045.59709 | 124.6462 | 120.1578 | 111.2492 | 108.3803 | 126.0362 |
| 2046.56154 | 124.6551 | 120.174  | 111.2543 | 108.3847 | 126.0474 |
| 2047.52599 | 124.6539 | 120.1654 | 111.2349 | 108.382  | 126.0505 |
| 2048.49044 | 124.6515 | 120.1567 | 111.2306 | 108.389  | 126.0701 |
| 2049.45489 | 124.6711 | 120.1622 | 111.2489 | 108.3936 | 126.0937 |
| 2050.41934 | 124.6992 | 120.1807 | 111.2648 | 108.41   | 126.1125 |
| 2051.38379 | 124.7113 | 120.185  | 111.2674 | 108.4184 | 126.1112 |
| 2052.34824 | 124.7291 | 120.2067 | 111.2854 | 108.4342 | 126.1236 |
| 2053.31269 | 124.713  | 120.2012 | 111.2889 | 108.4296 | 126.119  |
| 2054.27714 | 124.6949 | 120.1979 | 111.2884 | 108.4304 | 126.1222 |
| 2055.24159 | 124.6987 | 120.1971 | 111.2849 | 108.4265 | 126.1167 |
| 2056.20604 | 124.7296 | 120.2242 | 111.3044 | 108.4462 | 126.136  |
| 2057.17049 | 124.7598 | 120.2574 | 111.3267 | 108.4791 | 126.1772 |
| 2058.13493 | 124.7771 | 120.2839 | 111.34   | 108.5013 | 126.1999 |
| 2059.09938 | 124.7876 | 120.2818 | 111.3563 | 108.5079 | 126.1942 |
| 2060.06383 | 124.7889 | 120.2872 | 111.3789 | 108.5182 | 126.163  |
| 2061.02828 | 124.8337 | 120.3285 | 111.3854 | 108.5416 | 126.2053 |

|            |          |          |          |          |          |
|------------|----------|----------|----------|----------|----------|
| 2061.99273 | 124.8865 | 120.3709 | 111.3951 | 108.5679 | 126.2809 |
| 2062.95718 | 124.9152 | 120.4059 | 111.4315 | 108.5606 | 126.298  |
| 2063.92163 | 124.8499 | 120.4118 | 111.5504 | 108.5679 | 126.1358 |
| 2064.88608 | 124.8278 | 120.4657 | 111.6061 | 108.522  | 125.9747 |
| 2065.85053 | 124.8885 | 120.4668 | 111.5015 | 108.5069 | 126.1296 |
| 2066.81498 | 124.8977 | 120.3989 | 111.4478 | 108.585  | 126.2826 |
| 2067.77943 | 124.9066 | 120.379  | 111.4475 | 108.6267 | 126.3239 |
| 2068.74388 | 124.9171 | 120.3843 | 111.4572 | 108.6369 | 126.3271 |
| 2069.70833 | 124.9459 | 120.4201 | 111.4831 | 108.6593 | 126.3589 |
| 2070.67278 | 124.9503 | 120.4434 | 111.4951 | 108.6673 | 126.379  |
| 2071.63722 | 124.932  | 120.4494 | 111.4769 | 108.6579 | 126.371  |
| 2072.60167 | 124.9232 | 120.4325 | 111.4706 | 108.6528 | 126.3457 |
| 2073.56612 | 124.9391 | 120.4355 | 111.4942 | 108.6679 | 126.3498 |
| 2074.53057 | 124.9728 | 120.4595 | 111.524  | 108.6841 | 126.3846 |
| 2075.49502 | 124.9927 | 120.4644 | 111.5302 | 108.7007 | 126.4218 |
| 2076.45947 | 124.9765 | 120.4335 | 111.5176 | 108.7034 | 126.4191 |
| 2077.42392 | 124.9795 | 120.4404 | 111.5318 | 108.7134 | 126.4359 |
| 2078.38837 | 125.0006 | 120.4766 | 111.5549 | 108.7296 | 126.4524 |
| 2079.35282 | 125.0353 | 120.5184 | 111.5758 | 108.7616 | 126.4831 |
| 2080.31727 | 125.0347 | 120.5039 | 111.5756 | 108.7612 | 126.4636 |
| 2081.28172 | 125.0396 | 120.503  | 111.5881 | 108.7698 | 126.4568 |
| 2082.24617 | 125.0521 | 120.5148 | 111.6019 | 108.7806 | 126.4786 |
| 2083.21062 | 125.0738 | 120.5281 | 111.6033 | 108.779  | 126.5056 |
| 2084.17507 | 125.0768 | 120.5348 | 111.6033 | 108.7865 | 126.5216 |
| 2085.13952 | 125.1021 | 120.5441 | 111.6295 | 108.8116 | 126.5558 |
| 2086.10397 | 125.1215 | 120.5483 | 111.6639 | 108.8272 | 126.5687 |
| 2087.06842 | 125.1471 | 120.5988 | 111.6925 | 108.8318 | 126.5835 |
| 2088.03286 | 125.1825 | 120.6421 | 111.7036 | 108.8266 | 126.6201 |
| 2088.99731 | 125.1639 | 120.6392 | 111.7558 | 108.8497 | 126.5627 |
| 2089.96176 | 125.1554 | 120.654  | 111.7845 | 108.8351 | 126.4786 |
| 2090.92621 | 125.182  | 120.6431 | 111.7242 | 108.8135 | 126.5669 |
| 2091.89066 | 125.1939 | 120.6193 | 111.7217 | 108.8654 | 126.6574 |
| 2092.85511 | 125.213  | 120.6266 | 111.7394 | 108.8981 | 126.6878 |
| 2093.81956 | 125.2195 | 120.6236 | 111.7554 | 108.9083 | 126.6997 |
| 2094.78401 | 125.2282 | 120.6385 | 111.7597 | 108.9066 | 126.7134 |
| 2095.74846 | 125.2467 | 120.6704 | 111.7739 | 108.923  | 126.7327 |
| 2096.71291 | 125.2635 | 120.7032 | 111.7994 | 108.945  | 126.7588 |
| 2097.67736 | 125.2814 | 120.7094 | 111.8121 | 108.9449 | 126.7711 |
| 2098.64181 | 125.3072 | 120.7204 | 111.8205 | 108.953  | 126.8043 |
| 2099.60626 | 125.3097 | 120.7253 | 111.8338 | 108.952  | 126.8126 |
| 2100.57071 | 125.332  | 120.7444 | 111.8514 | 108.9516 | 126.8383 |
| 2101.53516 | 125.341  | 120.7313 | 111.8558 | 108.9637 | 126.8499 |
| 2102.49961 | 125.3543 | 120.7425 | 111.8608 | 108.9814 | 126.8728 |
| 2103.46405 | 125.3604 | 120.7657 | 111.8681 | 108.9844 | 126.8975 |
| 2104.4285  | 125.4041 | 120.8129 | 111.909  | 109.0142 | 126.9514 |
| 2105.39295 | 125.4344 | 120.8264 | 111.9339 | 109.0279 | 126.9669 |
| 2106.3574  | 125.4374 | 120.8207 | 111.9414 | 109.0313 | 126.9624 |
| 2107.32185 | 125.4259 | 120.8203 | 111.9472 | 109.0402 | 126.9571 |
| 2108.2863  | 125.4396 | 120.8377 | 111.9535 | 109.0512 | 126.9861 |
| 2109.25075 | 125.4696 | 120.8533 | 111.9728 | 109.0616 | 127.02   |
| 2110.2152  | 125.4904 | 120.8629 | 111.9822 | 109.0651 | 127.0368 |
| 2111.17965 | 125.4927 | 120.8574 | 111.9881 | 109.0606 | 127.037  |
| 2112.1441  | 125.5115 | 120.8733 | 112.006  | 109.071  | 127.0707 |
| 2113.10855 | 125.5447 | 120.9062 | 112.0309 | 109.0966 | 127.1056 |

|            |          |          |          |          |          |
|------------|----------|----------|----------|----------|----------|
| 2114.073   | 125.5568 | 120.941  | 112.0618 | 109.1142 | 127.0881 |
| 2115.03745 | 125.572  | 120.9496 | 112.0754 | 109.1039 | 127.0817 |
| 2116.0019  | 125.6077 | 120.9533 | 112.0687 | 109.1103 | 127.1508 |
| 2116.96634 | 125.6367 | 120.9755 | 112.0869 | 109.1482 | 127.206  |
| 2117.9308  | 125.6578 | 121.0117 | 112.1063 | 109.1671 | 127.2351 |
| 2118.89524 | 125.6436 | 120.9968 | 112.0999 | 109.1606 | 127.2098 |
| 2119.85969 | 125.6428 | 120.997  | 112.0929 | 109.1692 | 127.2014 |
| 2120.82414 | 125.6539 | 121.0194 | 112.1148 | 109.1851 | 127.2313 |
| 2121.78859 | 125.6666 | 121.0363 | 112.1378 | 109.1899 | 127.2527 |
| 2122.75304 | 125.7025 | 121.0489 | 112.1597 | 109.2124 | 127.2661 |
| 2123.71749 | 125.739  | 121.0773 | 112.1837 | 109.2388 | 127.3042 |
| 2124.68194 | 125.7607 | 121.1012 | 112.2123 | 109.2626 | 127.334  |
| 2125.64639 | 125.7815 | 121.1243 | 112.2324 | 109.2884 | 127.3596 |
| 2126.61084 | 125.7803 | 121.1191 | 112.2202 | 109.2823 | 127.3593 |
| 2127.57529 | 125.7813 | 121.1109 | 112.1996 | 109.276  | 127.3634 |
| 2128.53974 | 125.797  | 121.1213 | 112.2183 | 109.2814 | 127.3783 |
| 2129.50419 | 125.8222 | 121.1598 | 112.2456 | 109.296  | 127.4066 |
| 2130.46864 | 125.8476 | 121.1914 | 112.2551 | 109.3143 | 127.4325 |
| 2131.43309 | 125.8757 | 121.2082 | 112.2696 | 109.327  | 127.4576 |
| 2132.39754 | 125.8948 | 121.2132 | 112.2866 | 109.3367 | 127.4744 |
| 2133.36198 | 125.9297 | 121.2456 | 112.3182 | 109.3646 | 127.5032 |
| 2134.32643 | 125.9561 | 121.2711 | 112.3549 | 109.3891 | 127.5223 |
| 2135.29088 | 125.9527 | 121.2719 | 112.3801 | 109.3895 | 127.4964 |
| 2136.25533 | 125.9498 | 121.2751 | 112.3734 | 109.3727 | 127.4662 |
| 2137.21978 | 125.9755 | 121.2962 | 112.3718 | 109.3983 | 127.5046 |
| 2138.18423 | 125.986  | 121.3043 | 112.395  | 109.4407 | 127.5303 |
| 2139.14868 | 125.9908 | 121.3128 | 112.3996 | 109.4436 | 127.5444 |
| 2140.11313 | 126.02   | 121.3192 | 112.403  | 109.451  | 127.5736 |
| 2141.07758 | 126.0418 | 121.325  | 112.4079 | 109.4693 | 127.5887 |
| 2142.04203 | 126.0382 | 121.3245 | 112.4017 | 109.4742 | 127.5873 |
| 2143.00648 | 126.054  | 121.3507 | 112.41   | 109.475  | 127.6186 |
| 2143.97093 | 126.0707 | 121.3757 | 112.4368 | 109.4886 | 127.6394 |
| 2144.93538 | 126.0873 | 121.3835 | 112.4512 | 109.4987 | 127.6563 |
| 2145.89983 | 126.114  | 121.4023 | 112.4707 | 109.5125 | 127.6943 |
| 2146.86427 | 126.1475 | 121.4358 | 112.4934 | 109.5384 | 127.7388 |
| 2147.82872 | 126.1691 | 121.4555 | 112.5071 | 109.5492 | 127.7459 |
| 2148.79317 | 126.1762 | 121.4548 | 112.506  | 109.5552 | 127.7317 |
| 2149.75762 | 126.1732 | 121.4516 | 112.5145 | 109.5737 | 127.7276 |
| 2150.72207 | 126.1735 | 121.4514 | 112.521  | 109.5789 | 127.7259 |
| 2151.68652 | 126.1781 | 121.4551 | 112.5331 | 109.5816 | 127.7257 |
| 2152.65097 | 126.183  | 121.4616 | 112.5337 | 109.5862 | 127.7291 |
| 2153.61542 | 126.1784 | 121.4579 | 112.5344 | 109.595  | 127.7331 |
| 2154.57987 | 126.1866 | 121.4769 | 112.542  | 109.6125 | 127.7597 |
| 2155.54432 | 126.2156 | 121.5002 | 112.5658 | 109.6314 | 127.7847 |
| 2156.50877 | 126.2477 | 121.5243 | 112.5891 | 109.6486 | 127.8082 |
| 2157.47322 | 126.2455 | 121.5157 | 112.5874 | 109.6429 | 127.8085 |
| 2158.43767 | 126.252  | 121.5239 | 112.5819 | 109.6475 | 127.821  |
| 2159.40212 | 126.2718 | 121.5441 | 112.5894 | 109.6535 | 127.8498 |
| 2160.36657 | 126.2792 | 121.5588 | 112.6052 | 109.6435 | 127.8615 |
| 2161.33102 | 126.2721 | 121.5418 | 112.6017 | 109.6315 | 127.8349 |
| 2162.29547 | 126.2969 | 121.5416 | 112.5954 | 109.6403 | 127.8667 |
| 2163.25991 | 126.3189 | 121.5587 | 112.6093 | 109.6633 | 127.9086 |
| 2164.22436 | 126.3348 | 121.5769 | 112.6236 | 109.6811 | 127.9261 |
| 2165.18881 | 126.3462 | 121.5731 | 112.6266 | 109.6923 | 127.9219 |

|            |          |          |          |          |          |
|------------|----------|----------|----------|----------|----------|
| 2166.15326 | 126.3676 | 121.5712 | 112.6435 | 109.7024 | 127.9237 |
| 2167.11771 | 126.376  | 121.5849 | 112.6775 | 109.7236 | 127.9373 |
| 2168.08216 | 126.3547 | 121.5855 | 112.6901 | 109.7293 | 127.9353 |
| 2169.04661 | 126.3402 | 121.5721 | 112.6819 | 109.7253 | 127.9142 |
| 2170.01106 | 126.3563 | 121.5728 | 112.6766 | 109.7396 | 127.9197 |
| 2170.97551 | 126.3725 | 121.5742 | 112.6918 | 109.7515 | 127.9336 |
| 2171.93996 | 126.3649 | 121.5815 | 112.6963 | 109.7455 | 127.9406 |
| 2172.90441 | 126.3755 | 121.5903 | 112.6985 | 109.7399 | 127.97   |
| 2173.86886 | 126.4153 | 121.6108 | 112.7119 | 109.7536 | 128.0146 |
| 2174.83331 | 126.4333 | 121.6265 | 112.7308 | 109.7661 | 128.0301 |
| 2175.79776 | 126.4411 | 121.638  | 112.7367 | 109.7679 | 128.0414 |
| 2176.76221 | 126.4561 | 121.6459 | 112.737  | 109.7662 | 128.0731 |
| 2177.72665 | 126.4837 | 121.6537 | 112.7439 | 109.7753 | 128.1043 |
| 2178.6911  | 126.5073 | 121.6493 | 112.7642 | 109.7906 | 128.1178 |
| 2179.65555 | 126.5151 | 121.6528 | 112.7764 | 109.8007 | 128.1297 |
| 2180.62    | 126.5088 | 121.6594 | 112.7881 | 109.7991 | 128.1259 |
| 2181.58445 | 126.5259 | 121.6771 | 112.8126 | 109.8057 | 128.1386 |
| 2182.5489  | 126.5323 | 121.6644 | 112.8246 | 109.8128 | 128.1467 |
| 2183.51335 | 126.5378 | 121.6559 | 112.8341 | 109.8258 | 128.1477 |
| 2184.4778  | 126.5498 | 121.6794 | 112.8567 | 109.8575 | 128.1689 |
| 2185.44225 | 126.5655 | 121.7067 | 112.8795 | 109.8862 | 128.1905 |
| 2186.4067  | 126.5663 | 121.7102 | 112.8732 | 109.8758 | 128.183  |
| 2187.37115 | 126.582  | 121.716  | 112.8699 | 109.8733 | 128.1936 |
| 2188.3356  | 126.6075 | 121.7304 | 112.9014 | 109.8992 | 128.2283 |
| 2189.30005 | 126.6197 | 121.7473 | 112.9131 | 109.8986 | 128.2502 |
| 2190.2645  | 126.6344 | 121.7558 | 112.9157 | 109.89   | 128.2768 |
| 2191.22895 | 126.6764 | 121.7811 | 112.9337 | 109.9119 | 128.3252 |
| 2192.19339 | 126.6849 | 121.7946 | 112.942  | 109.9255 | 128.3525 |
| 2193.15785 | 126.6881 | 121.8122 | 112.9491 | 109.9294 | 128.3682 |
| 2194.12229 | 126.6991 | 121.8163 | 112.9498 | 109.9237 | 128.3714 |
| 2195.08674 | 126.7226 | 121.8261 | 112.9593 | 109.935  | 128.3873 |
| 2196.05119 | 126.7397 | 121.8358 | 112.9881 | 109.9581 | 128.3945 |
| 2197.01564 | 126.7493 | 121.8426 | 113.007  | 109.9754 | 128.407  |
| 2197.98009 | 126.7628 | 121.8444 | 113.0204 | 109.9856 | 128.4223 |
| 2198.94454 | 126.7604 | 121.8353 | 113.0216 | 109.988  | 128.4147 |
| 2199.90899 | 126.7533 | 121.8244 | 113.0276 | 109.9949 | 128.4078 |
| 2200.87344 | 126.7611 | 121.8381 | 113.0476 | 110.0087 | 128.4197 |
| 2201.83789 | 126.7707 | 121.8572 | 113.0625 | 110.0306 | 128.4318 |
| 2202.80234 | 126.7735 | 121.8608 | 113.0563 | 110.0287 | 128.4356 |
| 2203.76679 | 126.7732 | 121.8538 | 113.0491 | 110.0109 | 128.4429 |
| 2204.73124 | 126.781  | 121.8667 | 113.0454 | 110.0072 | 128.4542 |
| 2205.69569 | 126.7937 | 121.895  | 113.0633 | 110.025  | 128.4755 |
| 2206.66014 | 126.8273 | 121.934  | 113.089  | 110.0571 | 128.523  |
| 2207.62459 | 126.8468 | 121.9503 | 113.098  | 110.0503 | 128.5485 |
| 2208.58903 | 126.8632 | 121.9523 | 113.0995 | 110.0442 | 128.5645 |
| 2209.55348 | 126.8603 | 121.9483 | 113.0966 | 110.048  | 128.5726 |
| 2210.51793 | 126.8712 | 121.9775 | 113.1066 | 110.0622 | 128.5973 |
| 2211.48238 | 126.8871 | 121.9831 | 113.1209 | 110.0741 | 128.6101 |
| 2212.44683 | 126.8995 | 121.9733 | 113.1278 | 110.0764 | 128.6087 |
| 2213.41128 | 126.9155 | 121.9809 | 113.1484 | 110.0953 | 128.6264 |
| 2214.37573 | 126.9303 | 121.9947 | 113.1625 | 110.1092 | 128.6335 |
| 2215.34018 | 126.9324 | 122.0015 | 113.1766 | 110.1195 | 128.6272 |
| 2216.30463 | 126.936  | 122.0092 | 113.1769 | 110.1386 | 128.6247 |
| 2217.26908 | 126.9382 | 122.0119 | 113.1815 | 110.1524 | 128.6254 |

|            |          |          |          |          |          |
|------------|----------|----------|----------|----------|----------|
| 2218.23353 | 126.9356 | 122.0176 | 113.1909 | 110.1458 | 128.6243 |
| 2219.19798 | 126.9468 | 122.0308 | 113.2092 | 110.1477 | 128.6349 |
| 2220.16243 | 126.977  | 122.0612 | 113.2371 | 110.184  | 128.6743 |
| 2221.12688 | 126.9873 | 122.0556 | 113.2517 | 110.1977 | 128.688  |
| 2222.09132 | 126.9945 | 122.062  | 113.2553 | 110.1953 | 128.7101 |
| 2223.05577 | 126.9998 | 122.0881 | 113.2611 | 110.196  | 128.7374 |
| 2224.02022 | 127.0204 | 122.1074 | 113.2607 | 110.1987 | 128.7632 |
| 2224.98467 | 127.0698 | 122.1271 | 113.2876 | 110.2247 | 128.794  |
| 2225.94912 | 127.1093 | 122.1574 | 113.304  | 110.2561 | 128.8282 |
| 2226.91357 | 127.112  | 122.1799 | 113.3122 | 110.2679 | 128.8443 |
| 2227.87802 | 127.105  | 122.1853 | 113.3135 | 110.2666 | 128.8536 |
| 2228.84247 | 127.1143 | 122.1776 | 113.3128 | 110.2601 | 128.8625 |
| 2229.80692 | 127.1368 | 122.1878 | 113.3212 | 110.2729 | 128.8735 |
| 2230.77137 | 127.153  | 122.2096 | 113.3392 | 110.2875 | 128.8844 |
| 2231.73582 | 127.1623 | 122.2268 | 113.3489 | 110.301  | 128.8961 |
| 2232.70027 | 127.1665 | 122.2195 | 113.356  | 110.314  | 128.892  |
| 2233.66472 | 127.1821 | 122.2049 | 113.3545 | 110.3166 | 128.8915 |
| 2234.62917 | 127.1902 | 122.2136 | 113.3753 | 110.3285 | 128.8988 |
| 2235.59362 | 127.205  | 122.2476 | 113.3848 | 110.344  | 128.9177 |
| 2236.55807 | 127.2214 | 122.2633 | 113.4009 | 110.3719 | 128.9474 |
| 2237.52252 | 127.2238 | 122.2431 | 113.3971 | 110.382  | 128.9599 |
| 2238.48697 | 127.216  | 122.2389 | 113.4015 | 110.3719 | 128.9592 |
| 2239.45141 | 127.2176 | 122.2428 | 113.3836 | 110.3629 | 128.9833 |
| 2240.41586 | 127.2348 | 122.251  | 113.3836 | 110.3707 | 129.0128 |
| 2241.38031 | 127.2504 | 122.2571 | 113.367  | 110.3676 | 129.04   |
| 2242.34476 | 127.2791 | 122.2674 | 113.3836 | 110.3759 | 129.0801 |
| 2243.30921 | 127.2894 | 122.2644 | 113.3939 | 110.3919 | 129.1128 |
| 2244.27366 | 127.2985 | 122.2733 | 113.3944 | 110.3968 | 129.1275 |
| 2245.23811 | 127.2847 | 122.2574 | 113.3775 | 110.3947 | 129.1277 |
| 2246.20256 | 127.2891 | 122.2432 | 113.3689 | 110.3786 | 129.1308 |
| 2247.16701 | 127.2803 | 122.2116 | 113.366  | 110.3717 | 129.1215 |
| 2248.13146 | 127.2707 | 122.1888 | 113.3438 | 110.3574 | 129.1268 |
| 2249.09591 | 127.2511 | 122.1726 | 113.3336 | 110.3665 | 129.1082 |
| 2250.06036 | 127.2449 | 122.1458 | 113.3055 | 110.3511 | 129.1073 |
| 2251.02481 | 127.2439 | 122.1319 | 113.3243 | 110.3787 | 129.1155 |
| 2251.98926 | 127.2384 | 122.1249 | 113.309  | 110.3798 | 129.1258 |
| 2252.9537  | 127.2252 | 122.0994 | 113.2958 | 110.3733 | 129.1112 |
| 2253.91815 | 127.214  | 122.051  | 113.2479 | 110.3386 | 129.1237 |
| 2254.8826  | 127.2092 | 122.0315 | 113.2448 | 110.3438 | 129.1431 |
| 2255.84705 | 127.1875 | 121.9912 | 113.2076 | 110.3249 | 129.1587 |
| 2256.8115  | 127.1767 | 121.9693 | 113.1935 | 110.3173 | 129.1668 |
| 2257.77595 | 127.1785 | 121.9479 | 113.157  | 110.2957 | 129.1913 |
| 2258.7404  | 127.1925 | 121.9457 | 113.1608 | 110.3068 | 129.2179 |
| 2259.70485 | 127.1824 | 121.9111 | 113.1306 | 110.2974 | 129.2443 |
| 2260.6693  | 127.1883 | 121.9063 | 113.1247 | 110.3111 | 129.2725 |
| 2261.63375 | 127.1654 | 121.8676 | 113.0741 | 110.2864 | 129.2837 |
| 2262.5982  | 127.1654 | 121.8332 | 113.069  | 110.2877 | 129.288  |
| 2263.56265 | 127.1581 | 121.7931 | 113.0656 | 110.2965 | 129.2922 |
| 2264.5271  | 127.1667 | 121.8047 | 113.087  | 110.3221 | 129.3099 |
| 2265.49155 | 127.1648 | 121.7995 | 113.0717 | 110.3181 | 129.3246 |
| 2266.456   | 127.1668 | 121.8012 | 113.0749 | 110.3294 | 129.3295 |
| 2267.42045 | 127.1589 | 121.7687 | 113.0582 | 110.3261 | 129.32   |
| 2268.3849  | 127.1724 | 121.7745 | 113.0724 | 110.3465 | 129.327  |
| 2269.34934 | 127.1593 | 121.7579 | 113.0713 | 110.345  | 129.3404 |

|            |          |          |          |          |          |
|------------|----------|----------|----------|----------|----------|
| 2270.31379 | 127.1599 | 121.7583 | 113.0725 | 110.346  | 129.3531 |
| 2271.27824 | 127.1734 | 121.7542 | 113.083  | 110.3542 | 129.3709 |
| 2272.24269 | 127.2165 | 121.7908 | 113.121  | 110.3845 | 129.4011 |
| 2273.20714 | 127.2423 | 121.804  | 113.1348 | 110.3945 | 129.4422 |
| 2274.17159 | 127.2691 | 121.8313 | 113.1573 | 110.3949 | 129.4674 |
| 2275.13604 | 127.2751 | 121.8395 | 113.1541 | 110.3938 | 129.4917 |
| 2276.10049 | 127.3146 | 121.8869 | 113.1899 | 110.4256 | 129.5315 |
| 2277.06494 | 127.3343 | 121.9042 | 113.2195 | 110.4545 | 129.5454 |
| 2278.02939 | 127.3726 | 121.9615 | 113.2576 | 110.4769 | 129.5814 |
| 2278.99384 | 127.4007 | 122.0138 | 113.3038 | 110.5015 | 129.6085 |
| 2279.95829 | 127.4684 | 122.083  | 113.3561 | 110.531  | 129.629  |
| 2280.92274 | 127.5254 | 122.1479 | 113.4443 | 110.5691 | 129.6514 |
| 2281.88719 | 127.5919 | 122.2222 | 113.5325 | 110.606  | 129.6819 |
| 2282.85164 | 127.6635 | 122.2892 | 113.5912 | 110.6353 | 129.7238 |
| 2283.81608 | 127.6393 | 122.2382 | 113.5891 | 110.658  | 129.7186 |
| 2284.78053 | 127.5024 | 122.0326 | 113.4357 | 110.5836 | 129.6691 |
| 2285.74498 | 127.3772 | 121.8562 | 113.3045 | 110.5204 | 129.6314 |
| 2286.70943 | 127.207  | 121.6201 | 113.0955 | 110.4304 | 129.5879 |
| 2287.67388 | 127.1198 | 121.4681 | 112.9267 | 110.343  | 129.6034 |
| 2288.63833 | 126.9346 | 121.2331 | 112.7782 | 110.2723 | 129.5384 |
| 2289.60278 | 126.8124 | 121.0362 | 112.5499 | 110.1363 | 129.5193 |
| 2290.56723 | 126.6916 | 120.8559 | 112.4414 | 110.0838 | 129.4892 |
| 2291.53168 | 126.5313 | 120.582  | 112.1514 | 109.9354 | 129.4508 |
| 2292.49613 | 126.4187 | 120.4015 | 111.9918 | 109.8343 | 129.4368 |
| 2293.46058 | 126.1552 | 120.0595 | 111.7191 | 109.705  | 129.3366 |
| 2294.42503 | 126.0772 | 119.8961 | 111.4857 | 109.552  | 129.38   |
| 2295.38948 | 125.8538 | 119.6455 | 111.3796 | 109.5333 | 129.2681 |
| 2296.35393 | 125.6696 | 119.3364 | 110.9776 | 109.2934 | 129.2451 |
| 2297.31838 | 125.5565 | 119.1934 | 110.971  | 109.3199 | 129.1921 |
| 2298.28282 | 125.2902 | 118.8273 | 110.5695 | 109.0834 | 129.0975 |
| 2299.24727 | 125.2361 | 118.7354 | 110.506  | 109.0347 | 129.1115 |
| 2300.21172 | 124.8033 | 118.2149 | 110.1134 | 108.8765 | 128.8932 |
| 2301.17617 | 124.8128 | 118.1296 | 109.8704 | 108.7101 | 129.0074 |
| 2302.14062 | 124.5405 | 117.8598 | 109.8719 | 108.798  | 128.8261 |
| 2303.10507 | 124.4923 | 117.68   | 109.4455 | 108.49   | 128.9283 |
| 2304.06952 | 124.2526 | 117.3974 | 109.4886 | 108.5726 | 128.7554 |
| 2305.03397 | 123.9223 | 116.8329 | 108.7266 | 108.1114 | 128.7269 |
| 2305.99842 | 123.5145 | 116.3217 | 108.5264 | 108.0464 | 128.5432 |
| 2306.96287 | 122.9532 | 115.5117 | 107.6068 | 107.544  | 128.3927 |
| 2307.92732 | 122.7721 | 115.2315 | 107.4224 | 107.4377 | 128.4029 |
| 2308.89177 | 122.1427 | 114.3965 | 106.7194 | 107.121  | 128.1362 |
| 2309.85622 | 122.0595 | 114.1249 | 106.3458 | 106.8304 | 128.2816 |
| 2310.82067 | 121.4621 | 113.4313 | 106.0054 | 106.8003 | 127.9403 |
| 2311.78512 | 121.4828 | 113.2946 | 105.4929 | 106.3873 | 128.1957 |
| 2312.74957 | 121.1243 | 112.9818 | 105.6703 | 106.6562 | 127.8811 |
| 2313.71402 | 121.2066 | 112.8814 | 105.1017 | 106.1699 | 128.1923 |
| 2314.67846 | 121.0336 | 112.7759 | 105.5019 | 106.5669 | 127.9968 |
| 2315.64291 | 120.9009 | 112.4211 | 104.7442 | 106.058  | 128.2063 |
| 2316.60736 | 120.3593 | 111.8405 | 104.6773 | 106.1956 | 127.8886 |
| 2317.57181 | 119.9083 | 111.0319 | 103.5647 | 105.4974 | 127.9597 |
| 2318.53626 | 119.2444 | 110.2805 | 103.3981 | 105.5594 | 127.6147 |
| 2319.50071 | 118.5784 | 109.2771 | 102.0919 | 104.7212 | 127.6232 |
| 2320.46516 | 117.8877 | 108.4529 | 101.8025 | 104.7012 | 127.3072 |
| 2321.42961 | 117.3833 | 107.5867 | 100.6787 | 104.0214 | 127.3732 |

|            |          |          |          |          |          |
|------------|----------|----------|----------|----------|----------|
| 2322.39406 | 116.9843 | 107.1437 | 100.6784 | 104.0888 | 127.1852 |
| 2323.35851 | 116.5125 | 106.5237 | 99.83472 | 103.549  | 127.1731 |
| 2324.32296 | 116.314  | 106.3024 | 99.78431 | 103.5863 | 127.1476 |
| 2325.28741 | 116.1598 | 105.9685 | 99.30578 | 103.301  | 127.2973 |
| 2326.25186 | 115.8712 | 105.6312 | 99.23124 | 103.3533 | 127.2336 |
| 2327.21631 | 115.3593 | 104.9319 | 98.41376 | 102.9455 | 127.2225 |
| 2328.18075 | 115.0774 | 104.6226 | 98.29111 | 102.9217 | 127.1476 |
| 2329.1452  | 114.5122 | 103.9613 | 97.57303 | 102.4989 | 127.0259 |
| 2330.10965 | 114.1582 | 103.6478 | 97.41964 | 102.3582 | 126.8602 |
| 2331.0741  | 113.8547 | 103.2675 | 97.01071 | 102.1127 | 126.8453 |
| 2332.03855 | 113.9123 | 103.3815 | 97.14625 | 102.2288 | 126.9417 |
| 2333.003   | 114.0637 | 103.5909 | 97.19625 | 102.2936 | 127.1745 |
| 2333.96745 | 114.3977 | 103.9984 | 97.51937 | 102.5484 | 127.4659 |
| 2334.9319  | 114.3762 | 103.9753 | 97.52949 | 102.648  | 127.5745 |
| 2335.89635 | 113.7198 | 103.2337 | 97.096   | 102.4842 | 127.248  |
| 2336.8608  | 113.4038 | 102.8089 | 96.44863 | 102.078  | 127.2493 |
| 2337.82525 | 113.7875 | 103.2817 | 96.84673 | 102.2571 | 127.424  |
| 2338.7897  | 113.5876 | 103.0572 | 96.67408 | 102.189  | 127.3072 |
| 2339.75415 | 113.1886 | 102.5868 | 96.16738 | 101.9303 | 127.1909 |
| 2340.7186  | 112.8022 | 102.0732 | 95.55366 | 101.5725 | 127.0902 |
| 2341.68305 | 112.6546 | 101.9446 | 95.41309 | 101.4431 | 127.0111 |
| 2342.6475  | 112.5552 | 101.8908 | 95.31378 | 101.3682 | 126.9387 |
| 2343.61195 | 112.6843 | 102.1545 | 95.54779 | 101.4473 | 126.81   |
| 2344.57639 | 112.9984 | 102.667  | 95.97332 | 101.6129 | 126.7161 |
| 2345.54084 | 113.786  | 103.8469 | 96.91031 | 102.0621 | 126.7427 |
| 2346.50529 | 115.3653 | 105.9729 | 98.57631 | 102.8892 | 127.0968 |
| 2347.46974 | 117.5416 | 108.5397 | 100.5355 | 103.8733 | 127.9079 |
| 2348.43419 | 119.2379 | 110.3659 | 102.181  | 104.778  | 128.6809 |
| 2349.39864 | 118.4929 | 109.4503 | 102.1068 | 105.0179 | 128.3109 |
| 2350.36309 | 116.6159 | 107.0512 | 100.0409 | 104.0411 | 127.7731 |
| 2351.32754 | 115.2737 | 105.3088 | 98.42803 | 103.1991 | 127.4687 |
| 2352.29199 | 113.8987 | 103.48   | 96.6158  | 102.2385 | 127.2711 |
| 2353.25644 | 112.7301 | 102.0317 | 95.35191 | 101.652  | 127.0372 |
| 2354.22089 | 111.6119 | 100.6591 | 93.9964  | 100.9467 | 126.786  |
| 2355.18534 | 110.4731 | 99.27177 | 92.70254 | 100.1743 | 126.5069 |
| 2356.14979 | 109.1355 | 97.50464 | 91.00362 | 99.23718 | 126.2261 |
| 2357.11424 | 108.4394 | 96.63096 | 90.26482 | 98.89052 | 126.0724 |
| 2358.07869 | 107.9929 | 96.08038 | 89.59588 | 98.51141 | 126.0522 |
| 2359.04313 | 107.8824 | 96.00725 | 89.4556  | 98.39919 | 126.0701 |
| 2360.00758 | 107.4574 | 95.44243 | 88.80851 | 98.03433 | 125.9314 |
| 2360.97203 | 107.864  | 95.86368 | 89.25939 | 98.26588 | 126.0375 |
| 2361.93648 | 108.0416 | 96.04371 | 89.41077 | 98.36516 | 126.0732 |
| 2362.90093 | 108.226  | 96.36888 | 89.72073 | 98.56123 | 126.1178 |
| 2363.86538 | 108.5087 | 96.8265  | 90.14324 | 98.72934 | 126.1555 |
| 2364.82983 | 109.2205 | 97.88525 | 91.13531 | 99.18195 | 126.2662 |
| 2365.79428 | 109.9333 | 98.90643 | 91.9745  | 99.59335 | 126.4241 |
| 2366.75873 | 110.8752 | 100.2147 | 93.19614 | 100.1959 | 126.6048 |
| 2367.72318 | 111.7489 | 101.3294 | 94.18603 | 100.7136 | 126.7786 |
| 2368.68763 | 112.8166 | 102.7477 | 95.4998  | 101.4424 | 127.02   |
| 2369.65208 | 113.8769 | 104.0996 | 96.72287 | 102.1324 | 127.2383 |
| 2370.61653 | 115.0578 | 105.5914 | 98.1043  | 102.8329 | 127.4505 |
| 2371.58098 | 116.1533 | 107.0235 | 99.37169 | 103.4842 | 127.6716 |
| 2372.54543 | 117.2797 | 108.4987 | 100.7441 | 104.1858 | 127.9122 |
| 2373.50988 | 118.3668 | 109.9117 | 102.0171 | 104.8719 | 128.1362 |

|            |          |          |          |          |          |
|------------|----------|----------|----------|----------|----------|
| 2374.47432 | 119.431  | 111.3234 | 103.3035 | 105.5532 | 128.3904 |
| 2375.43877 | 120.4267 | 112.6538 | 104.5001 | 106.1615 | 128.6531 |
| 2376.40322 | 121.3877 | 113.9044 | 105.6689 | 106.7588 | 128.9173 |
| 2377.36767 | 122.2711 | 115.0344 | 106.7099 | 107.2958 | 129.1396 |
| 2378.33212 | 123.123  | 116.128  | 107.7074 | 107.8199 | 129.3576 |
| 2379.29657 | 123.9566 | 117.205  | 108.6718 | 108.3323 | 129.6001 |
| 2380.26102 | 124.8016 | 118.3035 | 109.6851 | 108.8723 | 129.8675 |
| 2381.22547 | 125.6363 | 119.394  | 110.6755 | 109.4259 | 130.1383 |
| 2382.18992 | 126.4475 | 120.4285 | 111.6554 | 109.9843 | 130.4061 |
| 2383.15437 | 127.2063 | 121.3963 | 112.5652 | 110.4919 | 130.6705 |
| 2384.11882 | 127.8488 | 122.2421 | 113.3546 | 110.9456 | 130.9057 |
| 2385.08327 | 128.3743 | 122.9121 | 113.9951 | 111.3141 | 131.096  |
| 2386.04772 | 128.7691 | 123.4106 | 114.4891 | 111.603  | 131.2397 |
| 2387.01217 | 129.042  | 123.7728 | 114.8253 | 111.8102 | 131.3359 |
| 2387.97662 | 129.1968 | 123.9895 | 115.0405 | 111.9316 | 131.3707 |
| 2388.94107 | 129.3162 | 124.1328 | 115.1779 | 112.0038 | 131.4045 |
| 2389.90551 | 129.3871 | 124.2026 | 115.2575 | 112.06   | 131.4286 |
| 2390.86996 | 129.4387 | 124.2504 | 115.3129 | 112.0939 | 131.4475 |
| 2391.83441 | 129.4756 | 124.2732 | 115.3389 | 112.1078 | 131.4717 |
| 2392.79886 | 129.5015 | 124.2799 | 115.3422 | 112.1117 | 131.4916 |
| 2393.76331 | 129.5047 | 124.2543 | 115.3303 | 112.1043 | 131.5074 |
| 2394.72776 | 129.5483 | 124.2613 | 115.3411 | 112.1155 | 131.5343 |
| 2395.69221 | 129.574  | 124.2755 | 115.3419 | 112.1176 | 131.5556 |
| 2396.65666 | 129.5813 | 124.2781 | 115.3267 | 112.1079 | 131.5758 |
| 2397.62111 | 129.5898 | 124.2739 | 115.3377 | 112.1116 | 131.6014 |
| 2398.58556 | 129.5916 | 124.2716 | 115.3364 | 112.1068 | 131.6152 |
| 2399.55001 | 129.5982 | 124.2908 | 115.3563 | 112.1205 | 131.6379 |
| 2400.51446 | 129.6351 | 124.3308 | 115.4013 | 112.1577 | 131.667  |
| 2401.47891 | 129.6511 | 124.3257 | 115.4124 | 112.1728 | 131.6716 |
| 2402.44336 | 129.6534 | 124.3033 | 115.4057 | 112.17   | 131.6528 |
| 2403.4078  | 129.6517 | 124.2995 | 115.4195 | 112.1756 | 131.6362 |
| 2404.37225 | 129.6639 | 124.3192 | 115.4417 | 112.1969 | 131.6339 |
| 2405.3367  | 129.6501 | 124.3162 | 115.4383 | 112.1883 | 131.6146 |
| 2406.30115 | 129.6711 | 124.3278 | 115.4417 | 112.18   | 131.6062 |
| 2407.2656  | 129.6972 | 124.3444 | 115.4555 | 112.1872 | 131.6208 |
| 2408.23005 | 129.7201 | 124.3833 | 115.4841 | 112.2155 | 131.6633 |
| 2409.1945  | 129.7212 | 124.3943 | 115.4991 | 112.2262 | 131.6897 |
| 2410.15895 | 129.725  | 124.3835 | 115.4911 | 112.2106 | 131.6883 |
| 2411.1234  | 129.7377 | 124.3756 | 115.4861 | 112.1983 | 131.7019 |
| 2412.08785 | 129.7741 | 124.3928 | 115.4983 | 112.2092 | 131.7379 |
| 2413.0523  | 129.8044 | 124.4086 | 115.5112 | 112.2172 | 131.7747 |
| 2414.01675 | 129.8195 | 124.4145 | 115.5062 | 112.2082 | 131.8064 |
| 2414.9812  | 129.84   | 124.4226 | 115.5104 | 112.2026 | 131.8279 |
| 2415.94565 | 129.8994 | 124.4601 | 115.5461 | 112.2348 | 131.8656 |
| 2416.9101  | 129.9479 | 124.4891 | 115.5859 | 112.2802 | 131.9102 |
| 2417.87455 | 129.9712 | 124.4994 | 115.6115 | 112.3026 | 131.9401 |
| 2418.839   | 129.9976 | 124.5081 | 115.6442 | 112.3303 | 131.9709 |
| 2419.80344 | 130.0349 | 124.5069 | 115.6742 | 112.3536 | 131.9755 |
| 2420.76789 | 130.0383 | 124.4899 | 115.6825 | 112.3601 | 131.9555 |
| 2421.73234 | 130.0366 | 124.4785 | 115.6871 | 112.3615 | 131.9507 |
| 2422.69679 | 130.0388 | 124.4633 | 115.6935 | 112.3727 | 131.9507 |
| 2423.66124 | 130.0556 | 124.4671 | 115.6963 | 112.3844 | 131.9426 |
| 2424.62569 | 130.0781 | 124.4739 | 115.7191 | 112.3982 | 131.941  |
| 2425.59014 | 130.0966 | 124.4694 | 115.7315 | 112.3984 | 131.9386 |



|            |          |          |          |          |          |
|------------|----------|----------|----------|----------|----------|
| 2426.55459 | 130.1141 | 124.4587 | 115.738  | 112.3961 | 131.9643 |
| 2427.51904 | 130.1583 | 124.4764 | 115.7559 | 112.4149 | 132.0219 |
| 2428.48349 | 130.187  | 124.4898 | 115.7612 | 112.4433 | 132.0548 |
| 2429.44794 | 130.2183 | 124.5128 | 115.7725 | 112.4568 | 132.0903 |
| 2430.41239 | 130.2387 | 124.5335 | 115.7895 | 112.4567 | 132.1324 |
| 2431.37684 | 130.2631 | 124.5521 | 115.7955 | 112.4651 | 132.1714 |
| 2432.34129 | 130.2855 | 124.5636 | 115.8059 | 112.4751 | 132.2105 |
| 2433.30573 | 130.3091 | 124.5775 | 115.8266 | 112.4832 | 132.2428 |
| 2434.27018 | 130.3274 | 124.588  | 115.8375 | 112.4921 | 132.2621 |
| 2435.23463 | 130.3575 | 124.5981 | 115.8479 | 112.5064 | 132.2786 |
| 2436.19908 | 130.3798 | 124.6039 | 115.8657 | 112.5267 | 132.2929 |
| 2437.16353 | 130.393  | 124.6161 | 115.8852 | 112.549  | 132.2941 |
| 2438.12798 | 130.4095 | 124.6546 | 115.9161 | 112.5754 | 132.3017 |
| 2439.09243 | 130.4393 | 124.6798 | 115.9484 | 112.6045 | 132.3173 |
| 2440.05688 | 130.4319 | 124.6749 | 115.9514 | 112.615  | 132.3079 |
| 2441.02133 | 130.4307 | 124.6892 | 115.9635 | 112.6227 | 132.3008 |
| 2441.98578 | 130.4345 | 124.7096 | 115.9839 | 112.6349 | 132.3104 |
| 2442.95023 | 130.4408 | 124.7269 | 116.0004 | 112.6541 | 132.3254 |
| 2443.91468 | 130.4507 | 124.7312 | 116.0042 | 112.6605 | 132.3388 |
| 2444.87913 | 130.4684 | 124.7463 | 116.0128 | 112.6691 | 132.3695 |
| 2445.84358 | 130.489  | 124.7612 | 116.0224 | 112.6761 | 132.4008 |
| 2446.80803 | 130.5178 | 124.7976 | 116.0329 | 112.682  | 132.4329 |
| 2447.77248 | 130.5516 | 124.8419 | 116.0431 | 112.6966 | 132.4668 |
| 2448.73693 | 130.5791 | 124.8538 | 116.0514 | 112.7029 | 132.5026 |
| 2449.70137 | 130.595  | 124.8606 | 116.072  | 112.7145 | 132.5428 |
| 2450.66582 | 130.6231 | 124.8977 | 116.0961 | 112.7355 | 132.5775 |
| 2451.63027 | 130.6409 | 124.9283 | 116.1052 | 112.7365 | 132.5949 |
| 2452.59472 | 130.663  | 124.9485 | 116.1182 | 112.7476 | 132.612  |
| 2453.55917 | 130.6805 | 124.9576 | 116.1418 | 112.7689 | 132.6246 |
| 2454.52362 | 130.6962 | 124.9753 | 116.1596 | 112.7902 | 132.6303 |
| 2455.48807 | 130.7203 | 124.9944 | 116.1867 | 112.8267 | 132.6511 |
| 2456.45252 | 130.748  | 125.0072 | 116.2187 | 112.8563 | 132.6662 |
| 2457.41697 | 130.7468 | 124.9955 | 116.233  | 112.86   | 132.6478 |
| 2458.38142 | 130.7457 | 125.0113 | 116.2532 | 112.8704 | 132.6372 |
| 2459.34587 | 130.7449 | 125.0251 | 116.2775 | 112.8934 | 132.6524 |
| 2460.31032 | 130.7682 | 125.0456 | 116.3018 | 112.9123 | 132.6714 |
| 2461.27477 | 130.7755 | 125.0481 | 116.3081 | 112.9129 | 132.6848 |
| 2462.23922 | 130.7856 | 125.0642 | 116.3168 | 112.9245 | 132.7055 |
| 2463.20367 | 130.813  | 125.0886 | 116.3319 | 112.9401 | 132.7472 |
| 2464.16811 | 130.8321 | 125.1062 | 116.3403 | 112.9476 | 132.7764 |
| 2465.13256 | 130.8652 | 125.1388 | 116.3618 | 112.9617 | 132.8196 |
| 2466.09701 | 130.908  | 125.1908 | 116.3869 | 112.9784 | 132.883  |
| 2467.06146 | 130.9327 | 125.2158 | 116.4005 | 112.9962 | 132.9261 |
| 2468.02591 | 130.9335 | 125.2128 | 116.3966 | 113.0008 | 132.9398 |
| 2468.99036 | 130.9378 | 125.2156 | 116.3985 | 113.0008 | 132.9505 |
| 2469.95481 | 130.9839 | 125.2465 | 116.4351 | 113.0246 | 132.9736 |
| 2470.91926 | 131.0217 | 125.2804 | 116.4771 | 113.0565 | 133.0114 |
| 2471.88371 | 131.0492 | 125.3208 | 116.5095 | 113.0821 | 133.0352 |
| 2472.84816 | 131.0528 | 125.335  | 116.5303 | 113.0938 | 133.0312 |
| 2473.81261 | 131.0597 | 125.3324 | 116.5422 | 113.106  | 133.0151 |
| 2474.77706 | 131.07   | 125.3371 | 116.5557 | 113.1257 | 133.0132 |
| 2475.74151 | 131.083  | 125.3618 | 116.5745 | 113.1559 | 133.0243 |
| 2476.70596 | 131.0859 | 125.3741 | 116.593  | 113.1738 | 133.0334 |
| 2477.67041 | 131.1011 | 125.3832 | 116.6168 | 113.1864 | 133.0568 |

|            |          |          |          |          |          |
|------------|----------|----------|----------|----------|----------|
| 2478.63485 | 131.1139 | 125.3838 | 116.6248 | 113.197  | 133.0772 |
| 2479.59931 | 131.1181 | 125.4004 | 116.6345 | 113.2121 | 133.0964 |
| 2480.56375 | 131.1237 | 125.4195 | 116.6539 | 113.2174 | 133.1254 |
| 2481.5282  | 131.1408 | 125.4222 | 116.6557 | 113.2089 | 133.1451 |
| 2482.49265 | 131.1721 | 125.437  | 116.6701 | 113.2221 | 133.1798 |
| 2483.4571  | 131.2007 | 125.4576 | 116.6816 | 113.2379 | 133.2277 |
| 2484.42155 | 131.2198 | 125.4808 | 116.6912 | 113.2456 | 133.262  |
| 2485.386   | 131.2527 | 125.519  | 116.7172 | 113.2591 | 133.2958 |
| 2486.35045 | 131.2697 | 125.5292 | 116.7276 | 113.2586 | 133.3158 |
| 2487.3149  | 131.2872 | 125.532  | 116.7414 | 113.264  | 133.3334 |
| 2488.27935 | 131.3022 | 125.5493 | 116.7542 | 113.2917 | 133.3531 |
| 2489.2438  | 131.3294 | 125.5876 | 116.7732 | 113.3255 | 133.3759 |
| 2490.20825 | 131.3487 | 125.6146 | 116.795  | 113.3425 | 133.3912 |
| 2491.1727  | 131.3489 | 125.6025 | 116.801  | 113.3409 | 133.3759 |
| 2492.13715 | 131.3438 | 125.5884 | 116.8106 | 113.3561 | 133.3679 |
| 2493.1016  | 131.3552 | 125.6024 | 116.8398 | 113.3789 | 133.3776 |
| 2494.06605 | 131.3603 | 125.6023 | 116.8554 | 113.3885 | 133.3794 |
| 2495.03049 | 131.3752 | 125.6114 | 116.8769 | 113.4058 | 133.394  |
| 2495.99494 | 131.3837 | 125.626  | 116.8946 | 113.4228 | 133.4024 |
| 2496.95939 | 131.3946 | 125.6411 | 116.9018 | 113.4327 | 133.4041 |
| 2497.92384 | 131.4133 | 125.6522 | 116.9098 | 113.4306 | 133.4223 |
| 2498.88829 | 131.433  | 125.6584 | 116.9202 | 113.43   | 133.4603 |
| 2499.85274 | 131.4428 | 125.6725 | 116.9258 | 113.4329 | 133.4866 |
| 2500.81719 | 131.4499 | 125.6882 | 116.9213 | 113.4403 | 133.5138 |
| 2501.78164 | 131.4843 | 125.721  | 116.9372 | 113.4539 | 133.5592 |
| 2502.74609 | 131.5152 | 125.7367 | 116.9549 | 113.4563 | 133.5902 |
| 2503.71054 | 131.5164 | 125.7355 | 116.9598 | 113.4578 | 133.6046 |
| 2504.67499 | 131.538  | 125.7517 | 116.964  | 113.4665 | 133.6264 |
| 2505.63944 | 131.5624 | 125.7774 | 116.9851 | 113.4833 | 133.6572 |
| 2506.60389 | 131.5972 | 125.7997 | 117.0092 | 113.4954 | 133.687  |
| 2507.56834 | 131.6096 | 125.7986 | 117.0184 | 113.5104 | 133.7038 |
| 2508.53278 | 131.6231 | 125.8112 | 117.0337 | 113.5351 | 133.71   |
| 2509.49723 | 131.6466 | 125.8318 | 117.0657 | 113.5579 | 133.7109 |
| 2510.46168 | 131.6699 | 125.8461 | 117.095  | 113.5773 | 133.7029 |
| 2511.42613 | 131.678  | 125.8508 | 117.115  | 113.5954 | 133.6955 |
| 2512.39058 | 131.6849 | 125.8428 | 117.1199 | 113.6146 | 133.7032 |
| 2513.35503 | 131.6659 | 125.8211 | 117.1167 | 113.6208 | 133.6922 |
| 2514.31948 | 131.6581 | 125.8286 | 117.1276 | 113.6317 | 133.6889 |
| 2515.28393 | 131.6713 | 125.8475 | 117.1369 | 113.6274 | 133.7062 |
| 2516.24838 | 131.6817 | 125.8525 | 117.1329 | 113.6236 | 133.7207 |
| 2517.21283 | 131.6959 | 125.8569 | 117.1342 | 113.6396 | 133.7486 |
| 2518.17728 | 131.704  | 125.878  | 117.1448 | 113.638  | 133.77   |
| 2519.14173 | 131.6993 | 125.8859 | 117.1453 | 113.6227 | 133.7838 |
| 2520.10618 | 131.7149 | 125.8865 | 117.1365 | 113.6116 | 133.7994 |
| 2521.07063 | 131.7614 | 125.9131 | 117.1701 | 113.6378 | 133.8479 |
| 2522.03508 | 131.7898 | 125.9357 | 117.2016 | 113.6602 | 133.8803 |
| 2522.99953 | 131.8185 | 125.9679 | 117.2114 | 113.6746 | 133.9131 |
| 2523.96398 | 131.8226 | 125.9744 | 117.1854 | 113.6695 | 133.9243 |
| 2524.92842 | 131.8216 | 125.9713 | 117.2007 | 113.6734 | 133.9296 |
| 2525.89287 | 131.839  | 125.9826 | 117.2352 | 113.6879 | 133.9278 |
| 2526.85732 | 131.8527 | 125.9944 | 117.2506 | 113.7107 | 133.9237 |
| 2527.82177 | 131.8536 | 125.9955 | 117.2508 | 113.7246 | 133.9176 |
| 2528.78622 | 131.8478 | 125.9873 | 117.2606 | 113.7309 | 133.9158 |
| 2529.75067 | 131.8474 | 125.9777 | 117.2791 | 113.7387 | 133.9105 |

|            |          |          |          |          |          |
|------------|----------|----------|----------|----------|----------|
| 2530.71512 | 131.8278 | 125.9526 | 117.2741 | 113.7377 | 133.8773 |
| 2531.67957 | 131.8302 | 125.9569 | 117.2823 | 113.749  | 133.874  |
| 2532.64402 | 131.8485 | 125.9779 | 117.3013 | 113.7681 | 133.8901 |
| 2533.60847 | 131.87   | 125.9956 | 117.3091 | 113.7879 | 133.91   |
| 2534.57292 | 131.8829 | 126.0093 | 117.3147 | 113.7982 | 133.939  |
| 2535.53737 | 131.8846 | 126.0096 | 117.3122 | 113.7771 | 133.9542 |
| 2536.50182 | 131.8846 | 126.0023 | 117.301  | 113.7496 | 133.9607 |
| 2537.46627 | 131.8917 | 126.0047 | 117.2971 | 113.7465 | 133.9805 |
| 2538.43072 | 131.9003 | 126.0064 | 117.293  | 113.7417 | 133.988  |
| 2539.39516 | 131.941  | 126.0301 | 117.3176 | 113.7609 | 134.0245 |
| 2540.35961 | 131.9903 | 126.0691 | 117.3391 | 113.7951 | 134.0782 |
| 2541.32406 | 132.0154 | 126.079  | 117.3456 | 113.8091 | 134.0977 |
| 2542.28851 | 132.0101 | 126.0615 | 117.3449 | 113.8035 | 134.093  |
| 2543.25296 | 132.0259 | 126.0703 | 117.3684 | 113.818  | 134.104  |
| 2544.21741 | 132.0502 | 126.1    | 117.3962 | 113.8288 | 134.1188 |
| 2545.18186 | 132.0681 | 126.1157 | 117.4109 | 113.8379 | 134.1192 |
| 2546.14631 | 132.0731 | 126.1069 | 117.4137 | 113.8533 | 134.1179 |
| 2547.11076 | 132.0836 | 126.1063 | 117.4261 | 113.8702 | 134.1304 |
| 2548.07521 | 132.0792 | 126.1203 | 117.449  | 113.8879 | 134.1237 |
| 2549.03966 | 132.0889 | 126.1369 | 117.4773 | 113.8983 | 134.1271 |
| 2550.00411 | 132.0877 | 126.1259 | 117.4908 | 113.9019 | 134.136  |
| 2550.96856 | 132.1018 | 126.132  | 117.5076 | 113.9195 | 134.1498 |
| 2551.93301 | 132.1079 | 126.1352 | 117.5039 | 113.9309 | 134.1595 |
| 2552.89746 | 132.1135 | 126.1378 | 117.5    | 113.9296 | 134.1501 |
| 2553.86191 | 132.1206 | 126.1493 | 117.5107 | 113.9296 | 134.1523 |
| 2554.82636 | 132.1505 | 126.1793 | 117.524  | 113.9355 | 134.1971 |
| 2555.7908  | 132.1803 | 126.2046 | 117.5379 | 113.942  | 134.2559 |
| 2556.75525 | 132.196  | 126.2135 | 117.5491 | 113.9457 | 134.278  |
| 2557.7197  | 132.2143 | 126.2341 | 117.5529 | 113.951  | 134.2991 |
| 2558.68415 | 132.2264 | 126.2424 | 117.5554 | 113.9537 | 134.3259 |
| 2559.6486  | 132.2542 | 126.2529 | 117.5733 | 113.9639 | 134.3628 |
| 2560.61305 | 132.283  | 126.2769 | 117.5892 | 113.9872 | 134.3826 |
| 2561.5775  | 132.3059 | 126.3147 | 117.6084 | 114.0061 | 134.3819 |
| 2562.54195 | 132.3379 | 126.3299 | 117.6343 | 114.021  | 134.3963 |
| 2563.5064  | 132.3522 | 126.3251 | 117.6511 | 114.0406 | 134.4195 |
| 2564.47085 | 132.3475 | 126.318  | 117.6633 | 114.0598 | 134.4207 |
| 2565.4353  | 132.3321 | 126.3141 | 117.6748 | 114.0606 | 134.3873 |
| 2566.39975 | 132.3379 | 126.3213 | 117.6969 | 114.0727 | 134.3871 |
| 2567.3642  | 132.3616 | 126.3415 | 117.7275 | 114.1027 | 134.4152 |
| 2568.32865 | 132.3747 | 126.3499 | 117.7393 | 114.1086 | 134.4147 |
| 2569.2931  | 132.3689 | 126.3479 | 117.7288 | 114.1077 | 134.4065 |
| 2570.25754 | 132.3751 | 126.3592 | 117.7337 | 114.1102 | 134.4201 |
| 2571.22199 | 132.4045 | 126.3577 | 117.7519 | 114.1102 | 134.4372 |
| 2572.18644 | 132.4516 | 126.3803 | 117.7793 | 114.1382 | 134.485  |
| 2573.15089 | 132.4573 | 126.3866 | 117.7854 | 114.1411 | 134.5164 |
| 2574.11534 | 132.4549 | 126.3817 | 117.7784 | 114.1288 | 134.5237 |
| 2575.07979 | 132.4665 | 126.3867 | 117.7691 | 114.128  | 134.5542 |
| 2576.04424 | 132.4949 | 126.4009 | 117.7886 | 114.147  | 134.5995 |
| 2577.00869 | 132.5419 | 126.4463 | 117.838  | 114.1791 | 134.6437 |
| 2577.97314 | 132.567  | 126.4824 | 117.8597 | 114.1973 | 134.66   |
| 2578.93759 | 132.566  | 126.4753 | 117.8523 | 114.1928 | 134.668  |
| 2579.90204 | 132.5743 | 126.4692 | 117.8617 | 114.2021 | 134.6794 |
| 2580.86649 | 132.5937 | 126.5096 | 117.894  | 114.2287 | 134.6955 |
| 2581.83094 | 132.5979 | 126.5228 | 117.9034 | 114.2339 | 134.6861 |

|            |          |          |          |          |          |
|------------|----------|----------|----------|----------|----------|
| 2582.79539 | 132.6122 | 126.5135 | 117.9206 | 114.2474 | 134.6841 |
| 2583.75983 | 132.6483 | 126.5321 | 117.9469 | 114.2711 | 134.7109 |
| 2584.72428 | 132.6638 | 126.5559 | 117.9668 | 114.2896 | 134.7241 |
| 2585.68873 | 132.6823 | 126.5642 | 117.9896 | 114.3065 | 134.7275 |
| 2586.65318 | 132.6687 | 126.5474 | 117.9942 | 114.3024 | 134.7213 |
| 2587.61763 | 132.6589 | 126.5536 | 117.9959 | 114.3016 | 134.7203 |
| 2588.58208 | 132.6947 | 126.5812 | 118.0164 | 114.3286 | 134.7539 |
| 2589.54653 | 132.7227 | 126.5996 | 118.0429 | 114.356  | 134.7845 |
| 2590.51098 | 132.7237 | 126.6023 | 118.0465 | 114.3593 | 134.8003 |
| 2591.47543 | 132.7315 | 126.6003 | 118.0314 | 114.3471 | 134.8136 |
| 2592.43988 | 132.7404 | 126.6143 | 118.0306 | 114.3545 | 134.8562 |
| 2593.40433 | 132.7575 | 126.6355 | 118.0444 | 114.3775 | 134.9077 |
| 2594.36878 | 132.7959 | 126.6615 | 118.0706 | 114.3977 | 134.9345 |
| 2595.33323 | 132.8195 | 126.6718 | 118.0841 | 114.403  | 134.9441 |
| 2596.29768 | 132.8238 | 126.6718 | 118.0941 | 114.4019 | 134.9659 |
| 2597.26213 | 132.8406 | 126.697  | 118.1265 | 114.4244 | 134.9968 |
| 2598.22658 | 132.8526 | 126.7328 | 118.1599 | 114.4485 | 135.0093 |
| 2599.19103 | 132.8761 | 126.7537 | 118.1785 | 114.4687 | 135.0134 |
| 2600.15548 | 132.9    | 126.7551 | 118.1959 | 114.4906 | 135.0352 |
| 2601.11992 | 132.9225 | 126.7605 | 118.2223 | 114.5233 | 135.0598 |
| 2602.08437 | 132.9347 | 126.7729 | 118.2425 | 114.5383 | 135.0667 |
| 2603.04882 | 132.9401 | 126.7833 | 118.2553 | 114.5378 | 135.0584 |
| 2604.01327 | 132.932  | 126.7703 | 118.2492 | 114.532  | 135.0403 |
| 2604.97772 | 132.9271 | 126.7723 | 118.2449 | 114.5343 | 135.0469 |
| 2605.94217 | 132.9325 | 126.784  | 118.2513 | 114.544  | 135.0591 |
| 2606.90662 | 132.9491 | 126.7982 | 118.2601 | 114.5548 | 135.0799 |
| 2607.87107 | 132.9571 | 126.8086 | 118.2694 | 114.5564 | 135.1008 |
| 2608.83552 | 132.9749 | 126.822  | 118.2852 | 114.5713 | 135.1271 |
| 2609.79997 | 132.9986 | 126.8451 | 118.3059 | 114.591  | 135.1624 |
| 2610.76442 | 133.0191 | 126.8639 | 118.3226 | 114.5957 | 135.189  |
| 2611.72887 | 133.0259 | 126.8715 | 118.3364 | 114.5971 | 135.2048 |
| 2612.69332 | 133.0374 | 126.8865 | 118.341  | 114.6039 | 135.2199 |
| 2613.65777 | 133.0449 | 126.8944 | 118.3325 | 114.6045 | 135.2339 |
| 2614.62221 | 133.0478 | 126.8886 | 118.3337 | 114.6018 | 135.2367 |
| 2615.58666 | 133.057  | 126.8949 | 118.3369 | 114.6036 | 135.2379 |
| 2616.55111 | 133.096  | 126.9322 | 118.3635 | 114.6419 | 135.273  |
| 2617.51556 | 133.1171 | 126.9505 | 118.3913 | 114.6685 | 135.2993 |
| 2618.48001 | 133.1113 | 126.9386 | 118.4014 | 114.6603 | 135.2841 |
| 2619.44446 | 133.1211 | 126.9458 | 118.4201 | 114.6674 | 135.29   |
| 2620.40891 | 133.1367 | 126.9696 | 118.4384 | 114.6803 | 135.294  |
| 2621.37336 | 133.1346 | 126.972  | 118.4454 | 114.6888 | 135.2855 |
| 2622.33781 | 133.1283 | 126.9544 | 118.4423 | 114.6966 | 135.28   |
| 2623.30226 | 133.096  | 126.912  | 118.4218 | 114.6892 | 135.2491 |
| 2624.26671 | 133.0902 | 126.8898 | 118.4091 | 114.6791 | 135.2351 |
| 2625.23116 | 133.1092 | 126.9132 | 118.4204 | 114.6945 | 135.2635 |
| 2626.19561 | 133.1291 | 126.9274 | 118.4266 | 114.708  | 135.2901 |
| 2627.16006 | 133.1476 | 126.9428 | 118.4417 | 114.7195 | 135.3222 |
| 2628.12451 | 133.158  | 126.9416 | 118.4416 | 114.7161 | 135.3344 |
| 2629.08896 | 133.1856 | 126.9687 | 118.4552 | 114.7193 | 135.3687 |
| 2630.05341 | 133.231  | 127.0086 | 118.4911 | 114.7415 | 135.4277 |
| 2631.01785 | 133.2404 | 127.012  | 118.4943 | 114.7524 | 135.4387 |
| 2631.9823  | 133.2021 | 126.992  | 118.4711 | 114.7325 | 135.4076 |
| 2632.94675 | 133.159  | 126.948  | 118.418  | 114.697  | 135.3722 |
| 2633.9112  | 133.1984 | 126.9657 | 118.4431 | 114.7176 | 135.4141 |

|            |          |          |          |          |          |
|------------|----------|----------|----------|----------|----------|
| 2634.87565 | 133.2433 | 126.9913 | 118.4977 | 114.7405 | 135.4573 |
| 2635.8401  | 133.2159 | 126.9618 | 118.4754 | 114.728  | 135.4095 |
| 2636.80455 | 133.1544 | 126.9085 | 118.4256 | 114.6916 | 135.3367 |
| 2637.769   | 133.1761 | 126.9212 | 118.4523 | 114.701  | 135.3614 |
| 2638.73345 | 133.2166 | 126.9518 | 118.499  | 114.7411 | 135.4066 |
| 2639.6979  | 133.229  | 126.9685 | 118.5189 | 114.7523 | 135.4132 |
| 2640.66235 | 133.2372 | 127.0052 | 118.5479 | 114.7682 | 135.4179 |
| 2641.6268  | 133.243  | 127.0117 | 118.5663 | 114.7769 | 135.44   |
| 2642.59125 | 133.2481 | 126.9982 | 118.5737 | 114.7791 | 135.4529 |
| 2643.5557  | 133.256  | 126.9908 | 118.5686 | 114.7824 | 135.4654 |
| 2644.52015 | 133.2522 | 126.9898 | 118.5577 | 114.7768 | 135.4687 |
| 2645.48459 | 133.2491 | 126.9899 | 118.5603 | 114.7648 | 135.4691 |
| 2646.44904 | 133.255  | 126.9979 | 118.5647 | 114.757  | 135.4716 |
| 2647.41349 | 133.2662 | 127.0162 | 118.5639 | 114.765  | 135.4949 |
| 2648.37794 | 133.257  | 127.0138 | 118.5571 | 114.7707 | 135.5181 |
| 2649.34239 | 133.251  | 127.0094 | 118.5637 | 114.7617 | 135.5315 |
| 2650.30684 | 133.2535 | 127.0034 | 118.5626 | 114.7431 | 135.5308 |
| 2651.27129 | 133.2628 | 127.0114 | 118.5683 | 114.7426 | 135.5458 |
| 2652.23574 | 133.2817 | 127.0287 | 118.5873 | 114.7595 | 135.5724 |
| 2653.20019 | 133.2902 | 127.0256 | 118.5915 | 114.7636 | 135.5685 |
| 2654.16464 | 133.279  | 127.0103 | 118.5886 | 114.7618 | 135.5543 |
| 2655.12909 | 133.2831 | 127.0043 | 118.5984 | 114.7616 | 135.5575 |
| 2656.09354 | 133.2742 | 126.9922 | 118.5942 | 114.748  | 135.5456 |
| 2657.05799 | 133.2492 | 126.9814 | 118.5865 | 114.7431 | 135.5258 |
| 2658.02244 | 133.235  | 126.985  | 118.595  | 114.752  | 135.523  |
| 2658.98689 | 133.2247 | 126.9786 | 118.5922 | 114.7553 | 135.5146 |
| 2659.95134 | 133.23   | 126.9746 | 118.603  | 114.7678 | 135.5302 |
| 2660.91578 | 133.24   | 126.9756 | 118.6236 | 114.7722 | 135.5552 |
| 2661.88023 | 133.2227 | 126.9514 | 118.6122 | 114.7661 | 135.5485 |
| 2662.84468 | 133.2241 | 126.9438 | 118.5971 | 114.7664 | 135.5431 |
| 2663.80913 | 133.2196 | 126.9493 | 118.5956 | 114.7588 | 135.5438 |
| 2664.77358 | 133.2313 | 126.9672 | 118.627  | 114.7756 | 135.5719 |
| 2665.73803 | 133.2384 | 126.9807 | 118.6409 | 114.7875 | 135.6002 |
| 2666.70248 | 133.2357 | 126.9864 | 118.6279 | 114.781  | 135.6279 |
| 2667.66693 | 133.2257 | 126.9679 | 118.6286 | 114.7791 | 135.6375 |
| 2668.63138 | 133.2427 | 126.978  | 118.6424 | 114.8017 | 135.6549 |
| 2669.59583 | 133.2616 | 127.0045 | 118.6536 | 114.8105 | 135.6667 |
| 2670.56028 | 133.2624 | 126.9971 | 118.6454 | 114.8002 | 135.6693 |
| 2671.52473 | 133.1986 | 126.9281 | 118.5861 | 114.7564 | 135.6111 |
| 2672.48918 | 133.1382 | 126.8686 | 118.5237 | 114.719  | 135.5617 |
| 2673.45363 | 133.1896 | 126.9281 | 118.5852 | 114.7501 | 135.6299 |
| 2674.41808 | 133.1906 | 126.9488 | 118.6248 | 114.7778 | 135.639  |
| 2675.38253 | 133.1029 | 126.8618 | 118.5657 | 114.7441 | 135.5505 |
| 2676.34697 | 133.0527 | 126.7971 | 118.5119 | 114.7046 | 135.4783 |
| 2677.31142 | 133.079  | 126.8154 | 118.5258 | 114.716  | 135.489  |
| 2678.27587 | 133.0924 | 126.8325 | 118.5347 | 114.7471 | 135.5176 |
| 2679.24032 | 133.0356 | 126.7843 | 118.5006 | 114.7341 | 135.4728 |
| 2680.20477 | 133.0514 | 126.7852 | 118.5011 | 114.7233 | 135.4734 |
| 2681.16922 | 133.1996 | 126.9143 | 118.6325 | 114.8118 | 135.6016 |
| 2682.13367 | 133.2956 | 126.9988 | 118.7237 | 114.883  | 135.69   |
| 2683.09812 | 133.3104 | 127.0316 | 118.7447 | 114.8895 | 135.7298 |
| 2684.06257 | 133.3284 | 127.0521 | 118.7644 | 114.8891 | 135.7491 |
| 2685.02702 | 133.3333 | 127.0441 | 118.7767 | 114.8852 | 135.7568 |
| 2685.99147 | 133.3357 | 127.0488 | 118.781  | 114.8886 | 135.7734 |

|            |          |          |          |          |          |
|------------|----------|----------|----------|----------|----------|
| 2686.95592 | 133.3304 | 127.0502 | 118.7697 | 114.8876 | 135.7776 |
| 2687.92037 | 133.3292 | 127.0366 | 118.7616 | 114.886  | 135.7796 |
| 2688.88482 | 133.3471 | 127.0454 | 118.7737 | 114.8878 | 135.7957 |
| 2689.84926 | 133.3574 | 127.051  | 118.7877 | 114.8953 | 135.7819 |
| 2690.81371 | 133.3657 | 127.0621 | 118.8011 | 114.9095 | 135.7806 |
| 2691.77816 | 133.3587 | 127.0634 | 118.8086 | 114.9158 | 135.7869 |
| 2692.74261 | 133.3701 | 127.055  | 118.8094 | 114.9251 | 135.7854 |
| 2693.70706 | 133.3961 | 127.0533 | 118.8215 | 114.9453 | 135.7754 |
| 2694.67151 | 133.4077 | 127.0566 | 118.8435 | 114.954  | 135.7727 |
| 2695.63596 | 133.4128 | 127.0464 | 118.8497 | 114.9444 | 135.754  |
| 2696.60041 | 133.4128 | 127.0377 | 118.8479 | 114.9445 | 135.7397 |
| 2697.56486 | 133.4117 | 127.0324 | 118.8483 | 114.9559 | 135.733  |
| 2698.52931 | 133.451  | 127.0642 | 118.8708 | 114.9762 | 135.7618 |
| 2699.49376 | 133.5096 | 127.1188 | 118.9081 | 114.9953 | 135.7895 |
| 2700.45821 | 133.537  | 127.1447 | 118.9321 | 115.0079 | 135.7958 |
| 2701.42266 | 133.5591 | 127.1654 | 118.9534 | 115.0352 | 135.8163 |
| 2702.38711 | 133.5697 | 127.165  | 118.9545 | 115.0544 | 135.8206 |
| 2703.35156 | 133.6028 | 127.1729 | 118.9569 | 115.0709 | 135.834  |
| 2704.31601 | 133.6311 | 127.1847 | 118.9522 | 115.0679 | 135.849  |
| 2705.28046 | 133.672  | 127.2054 | 118.9787 | 115.0816 | 135.8748 |
| 2706.2449  | 133.7098 | 127.2049 | 118.9991 | 115.0969 | 135.8962 |
| 2707.20935 | 133.7119 | 127.1959 | 119.0044 | 115.0966 | 135.8965 |
| 2708.1738  | 133.6748 | 127.1607 | 118.9711 | 115.0786 | 135.8539 |
| 2709.13825 | 133.7022 | 127.1687 | 118.9691 | 115.0982 | 135.8625 |
| 2710.1027  | 133.7824 | 127.2368 | 119.0393 | 115.1504 | 135.9217 |
| 2711.06715 | 133.8327 | 127.2877 | 119.103  | 115.187  | 135.9421 |
| 2712.0316  | 133.8469 | 127.2924 | 119.1067 | 115.1961 | 135.9436 |
| 2712.99605 | 133.8349 | 127.2694 | 119.0885 | 115.1887 | 135.9158 |
| 2713.9605  | 133.8296 | 127.2528 | 119.0907 | 115.1933 | 135.9082 |
| 2714.92495 | 133.8303 | 127.2451 | 119.0924 | 115.1974 | 135.9022 |
| 2715.8894  | 133.8499 | 127.2792 | 119.1139 | 115.2108 | 135.9159 |
| 2716.85385 | 133.8491 | 127.2839 | 119.1268 | 115.2107 | 135.9239 |
| 2717.8183  | 133.8199 | 127.2576 | 119.1163 | 115.1921 | 135.9206 |
| 2718.78275 | 133.8241 | 127.267  | 119.1193 | 115.1905 | 135.9339 |
| 2719.74719 | 133.8204 | 127.2565 | 119.1052 | 115.1887 | 135.9126 |
| 2720.71164 | 133.7473 | 127.1486 | 119.0223 | 115.1339 | 135.8055 |
| 2721.67609 | 133.7758 | 127.1542 | 119.0287 | 115.1408 | 135.8141 |
| 2722.64054 | 133.9072 | 127.2808 | 119.1497 | 115.2267 | 135.9369 |
| 2723.60499 | 133.8606 | 127.2367 | 119.0974 | 115.2025 | 135.8917 |
| 2724.56944 | 133.7015 | 127.0719 | 118.9397 | 115.095  | 135.7452 |
| 2725.53389 | 133.6809 | 127.0326 | 118.8943 | 115.0605 | 135.7147 |
| 2726.49834 | 133.8767 | 127.2085 | 119.0626 | 115.1618 | 135.8879 |
| 2727.46279 | 134.0386 | 127.3687 | 119.2434 | 115.2805 | 136.0524 |
| 2728.42724 | 134.0811 | 127.4225 | 119.2975 | 115.3307 | 136.1089 |
| 2729.39169 | 134.0782 | 127.4304 | 119.2884 | 115.3241 | 136.1078 |
| 2730.35614 | 134.0756 | 127.4174 | 119.2795 | 115.3226 | 136.0892 |
| 2731.32059 | 134.082  | 127.4044 | 119.2935 | 115.3332 | 136.0882 |
| 2732.28504 | 134.0942 | 127.3976 | 119.3146 | 115.3378 | 136.0822 |
| 2733.24949 | 134.0873 | 127.3992 | 119.3196 | 115.3348 | 136.0828 |
| 2734.21394 | 134.0698 | 127.3941 | 119.3014 | 115.3327 | 136.0667 |
| 2735.17839 | 134.0188 | 127.3226 | 119.253  | 115.2997 | 136.0035 |
| 2736.14283 | 133.9615 | 127.2363 | 119.1776 | 115.2415 | 135.9245 |
| 2737.10728 | 134.0385 | 127.2897 | 119.2225 | 115.2691 | 135.9957 |
| 2738.07173 | 134.1419 | 127.3848 | 119.3057 | 115.3397 | 136.0919 |

|            |          |          |          |          |          |
|------------|----------|----------|----------|----------|----------|
| 2739.03618 | 134.1606 | 127.4012 | 119.3194 | 115.3538 | 136.1111 |
| 2740.00063 | 134.1632 | 127.3941 | 119.3181 | 115.3478 | 136.1199 |
| 2740.96508 | 134.1614 | 127.3853 | 119.3214 | 115.3418 | 136.1201 |
| 2741.92953 | 134.1571 | 127.3758 | 119.3344 | 115.3423 | 136.1161 |
| 2742.89398 | 134.1433 | 127.3598 | 119.3196 | 115.3344 | 136.1071 |
| 2743.85843 | 134.1544 | 127.3754 | 119.3345 | 115.343  | 136.1455 |
| 2744.82288 | 134.1485 | 127.3721 | 119.3438 | 115.3482 | 136.1511 |
| 2745.78733 | 134.0264 | 127.2586 | 119.2404 | 115.2965 | 136.0339 |
| 2746.75178 | 133.9383 | 127.1626 | 119.1359 | 115.2324 | 135.9383 |
| 2747.71623 | 134.0159 | 127.2198 | 119.2159 | 115.2777 | 135.9989 |
| 2748.68068 | 134.0166 | 127.2088 | 119.2244 | 115.2907 | 135.9988 |
| 2749.64513 | 134.06   | 127.2286 | 119.2326 | 115.3043 | 136.0232 |
| 2750.60957 | 134.1857 | 127.3575 | 119.3694 | 115.3779 | 136.1442 |
| 2751.57402 | 134.2584 | 127.4447 | 119.4686 | 115.4258 | 136.2204 |
| 2752.53847 | 134.2688 | 127.4502 | 119.4894 | 115.4364 | 136.2413 |
| 2753.50292 | 134.2532 | 127.4255 | 119.4752 | 115.4333 | 136.2286 |
| 2754.46737 | 134.2048 | 127.3805 | 119.4241 | 115.4082 | 136.1927 |
| 2755.43182 | 134.1995 | 127.3579 | 119.4049 | 115.4013 | 136.1844 |
| 2756.39627 | 134.2571 | 127.3968 | 119.4509 | 115.4286 | 136.2405 |
| 2757.36072 | 134.2665 | 127.4116 | 119.4571 | 115.443  | 136.26   |
| 2758.32517 | 134.2596 | 127.414  | 119.4472 | 115.4494 | 136.2677 |
| 2759.28962 | 134.2868 | 127.4401 | 119.4683 | 115.4583 | 136.2837 |
| 2760.25407 | 134.2886 | 127.4496 | 119.4923 | 115.4547 | 136.2854 |
| 2761.21852 | 134.2967 | 127.4559 | 119.514  | 115.4519 | 136.3036 |
| 2762.18297 | 134.3026 | 127.4555 | 119.5282 | 115.462  | 136.3008 |
| 2763.14742 | 134.3047 | 127.4687 | 119.539  | 115.4884 | 136.3095 |
| 2764.11187 | 134.2932 | 127.463  | 119.5401 | 115.4852 | 136.3047 |
| 2765.07631 | 134.2978 | 127.4498 | 119.541  | 115.4791 | 136.3035 |
| 2766.04076 | 134.3218 | 127.4593 | 119.5566 | 115.5012 | 136.3178 |
| 2767.00521 | 134.3216 | 127.4724 | 119.5748 | 115.5212 | 136.3286 |
| 2767.96966 | 134.3053 | 127.4578 | 119.5716 | 115.5214 | 136.321  |
| 2768.93411 | 134.3005 | 127.4367 | 119.5577 | 115.5115 | 136.3152 |
| 2769.89856 | 134.2903 | 127.451  | 119.5609 | 115.502  | 136.3263 |
| 2770.86301 | 134.2315 | 127.4128 | 119.5342 | 115.5012 | 136.2778 |
| 2771.82746 | 134.128  | 127.3076 | 119.4483 | 115.4555 | 136.1804 |
| 2772.79191 | 134.0296 | 127.1931 | 119.3615 | 115.3917 | 136.0772 |
| 2773.75636 | 133.9061 | 127.0673 | 119.2303 | 115.3038 | 135.9506 |
| 2774.72081 | 133.9729 | 127.127  | 119.2633 | 115.3191 | 136.0269 |
| 2775.68526 | 134.1639 | 127.3331 | 119.4618 | 115.4559 | 136.2413 |
| 2776.64971 | 134.2242 | 127.4284 | 119.5527 | 115.5182 | 136.317  |
| 2777.61416 | 134.2376 | 127.4427 | 119.5754 | 115.5237 | 136.3507 |
| 2778.57861 | 134.2632 | 127.4516 | 119.5999 | 115.5395 | 136.3858 |
| 2779.54306 | 134.2551 | 127.4413 | 119.6092 | 115.5404 | 136.3728 |
| 2780.50751 | 134.2348 | 127.429  | 119.5886 | 115.5287 | 136.3519 |
| 2781.47195 | 134.2169 | 127.422  | 119.5646 | 115.5261 | 136.3437 |
| 2782.4364  | 134.1917 | 127.4194 | 119.5608 | 115.5227 | 136.3418 |
| 2783.40085 | 134.1403 | 127.3887 | 119.5456 | 115.4928 | 136.3271 |
| 2784.3653  | 134.1128 | 127.3432 | 119.5269 | 115.4653 | 136.3178 |
| 2785.32975 | 134.0645 | 127.2853 | 119.4988 | 115.4387 | 136.2749 |
| 2786.2942  | 133.9367 | 127.1782 | 119.4316 | 115.3887 | 136.1689 |
| 2787.25865 | 133.7052 | 126.9633 | 119.2471 | 115.2543 | 135.9464 |
| 2788.2231  | 133.5927 | 126.8447 | 119.1193 | 115.1701 | 135.8243 |
| 2789.18755 | 133.6858 | 126.9095 | 119.1972 | 115.2289 | 135.9257 |
| 2790.152   | 133.659  | 126.8786 | 119.1943 | 115.2115 | 135.91   |

|            |          |          |          |          |          |
|------------|----------|----------|----------|----------|----------|
| 2791.11645 | 133.6656 | 126.8828 | 119.1916 | 115.1959 | 135.9134 |
| 2792.0809  | 133.7918 | 127.013  | 119.3212 | 115.2773 | 136.0528 |
| 2793.04535 | 133.7598 | 127.0084 | 119.3429 | 115.2751 | 136.0785 |
| 2794.0098  | 133.5681 | 126.8587 | 119.2095 | 115.1675 | 135.9397 |
| 2794.97424 | 133.4781 | 126.7797 | 119.1245 | 115.1076 | 135.8837 |
| 2795.93869 | 133.4268 | 126.7275 | 119.1159 | 115.0877 | 135.8627 |
| 2796.90314 | 133.2363 | 126.5451 | 118.9733 | 114.9791 | 135.6898 |
| 2797.86759 | 133.1973 | 126.4853 | 118.9038 | 114.9223 | 135.6468 |
| 2798.83204 | 133.3382 | 126.6162 | 119.0286 | 115.0012 | 135.7932 |
| 2799.79649 | 133.3764 | 126.6812 | 119.102  | 115.0475 | 135.8609 |
| 2800.76094 | 133.3402 | 126.6663 | 119.1063 | 115.0377 | 135.8498 |
| 2801.72539 | 133.2763 | 126.6153 | 119.0846 | 114.9952 | 135.8158 |
| 2802.68984 | 133.1813 | 126.5347 | 119.0304 | 114.9399 | 135.7555 |
| 2803.65429 | 133.0956 | 126.4662 | 118.9961 | 114.8993 | 135.7101 |
| 2804.61874 | 133.0009 | 126.3908 | 118.9538 | 114.8384 | 135.6565 |
| 2805.58319 | 132.8961 | 126.3164 | 118.8943 | 114.7719 | 135.582  |
| 2806.54764 | 132.7781 | 126.2187 | 118.819  | 114.7124 | 135.5011 |
| 2807.51209 | 132.5827 | 126.0382 | 118.6871 | 114.6097 | 135.3557 |
| 2808.47654 | 132.3187 | 125.8008 | 118.4808 | 114.452  | 135.1378 |
| 2809.44099 | 132.2319 | 125.7017 | 118.396  | 114.3667 | 135.0651 |
| 2810.40544 | 132.2938 | 125.7378 | 118.4799 | 114.398  | 135.1477 |
| 2811.36988 | 132.259  | 125.7077 | 118.487  | 114.3603 | 135.1384 |
| 2812.33433 | 132.1774 | 125.6497 | 118.4466 | 114.2961 | 135.0852 |
| 2813.29878 | 132.085  | 125.5752 | 118.4002 | 114.239  | 135.029  |
| 2814.26323 | 131.958  | 125.455  | 118.3289 | 114.1488 | 134.9532 |
| 2815.22768 | 131.8146 | 125.3199 | 118.2487 | 114.0491 | 134.8533 |
| 2816.19213 | 131.6703 | 125.183  | 118.1601 | 113.9661 | 134.7561 |
| 2817.15658 | 131.5143 | 125.0535 | 118.0641 | 113.88   | 134.6576 |
| 2818.12103 | 131.3203 | 124.8816 | 117.9511 | 113.7508 | 134.5083 |
| 2819.08548 | 131.138  | 124.7124 | 117.8412 | 113.6309 | 134.3627 |
| 2820.04993 | 130.9994 | 124.5988 | 117.7745 | 113.5495 | 134.2899 |
| 2821.01438 | 130.8004 | 124.4562 | 117.6723 | 113.4483 | 134.1889 |
| 2821.97883 | 130.5217 | 124.2359 | 117.5084 | 113.3056 | 134.0153 |
| 2822.94328 | 130.2517 | 124.0306 | 117.3398 | 113.1571 | 133.8652 |
| 2823.90773 | 129.9704 | 123.8372 | 117.1837 | 112.996  | 133.7334 |
| 2824.87218 | 129.6665 | 123.6468 | 117.0453 | 112.8339 | 133.6127 |
| 2825.83662 | 129.4088 | 123.4623 | 116.9079 | 112.6851 | 133.4737 |
| 2826.80107 | 129.2008 | 123.283  | 116.7828 | 112.5443 | 133.3199 |
| 2827.76552 | 128.9858 | 123.0763 | 116.6434 | 112.3945 | 133.1643 |
| 2828.72997 | 128.7325 | 122.83   | 116.4838 | 112.2139 | 132.9793 |
| 2829.69442 | 128.3967 | 122.5331 | 116.2721 | 111.9912 | 132.7617 |
| 2830.65887 | 128.0017 | 122.1785 | 116.0041 | 111.735  | 132.4641 |
| 2831.62332 | 127.6489 | 121.8473 | 115.7667 | 111.4818 | 132.1619 |
| 2832.58777 | 127.2306 | 121.4513 | 115.5085 | 111.189  | 131.8255 |
| 2833.55222 | 126.7249 | 120.9537 | 115.1447 | 110.8468 | 131.3963 |
| 2834.51667 | 126.3241 | 120.5356 | 114.8658 | 110.541  | 131.0548 |
| 2835.48112 | 125.8735 | 120.1101 | 114.6124 | 110.2405 | 130.6948 |
| 2836.44557 | 125.2383 | 119.5205 | 114.1888 | 109.8492 | 130.1403 |
| 2837.41002 | 124.6289 | 118.9025 | 113.7285 | 109.4206 | 129.5558 |
| 2838.37447 | 124.2513 | 118.466  | 113.4542 | 109.0977 | 129.2025 |
| 2839.33892 | 123.9638 | 118.153  | 113.32   | 108.8744 | 128.9997 |
| 2840.30337 | 123.543  | 117.7559 | 113.1152 | 108.5947 | 128.6857 |
| 2841.26782 | 123.027  | 117.2583 | 112.8118 | 108.2546 | 128.263  |
| 2842.23226 | 122.5807 | 116.7505 | 112.5189 | 107.9471 | 127.8445 |



|            |          |          |          |          |          |
|------------|----------|----------|----------|----------|----------|
| 2843.19671 | 122.2153 | 116.2851 | 112.2739 | 107.6827 | 127.4413 |
| 2844.16116 | 121.7733 | 115.7642 | 111.9599 | 107.3822 | 126.9864 |
| 2845.12561 | 121.1729 | 115.1133 | 111.5189 | 107.0186 | 126.4688 |
| 2846.09006 | 120.4586 | 114.3726 | 111.014  | 106.5889 | 125.9003 |
| 2847.05451 | 119.833  | 113.7395 | 110.571  | 106.2036 | 125.4262 |
| 2848.01896 | 119.2946 | 113.2223 | 110.2729 | 105.8822 | 125.0702 |
| 2848.98341 | 118.6158 | 112.6394 | 109.9124 | 105.4882 | 124.6821 |
| 2849.94786 | 117.7377 | 111.9642 | 109.402  | 104.9624 | 124.2134 |
| 2850.91231 | 116.8661 | 111.3428 | 108.9001 | 104.4313 | 123.7534 |
| 2851.87676 | 116.1611 | 110.8276 | 108.4886 | 103.9835 | 123.3179 |
| 2852.84121 | 115.5329 | 110.3686 | 108.1235 | 103.5764 | 122.8963 |
| 2853.80566 | 114.9642 | 109.9488 | 107.7767 | 103.1609 | 122.4902 |
| 2854.77011 | 114.8268 | 109.7346 | 107.6225 | 102.9538 | 122.1827 |
| 2855.73456 | 115.1215 | 109.7425 | 107.6902 | 102.9657 | 121.9621 |
| 2856.699   | 115.447  | 109.7676 | 107.7981 | 102.9766 | 121.7278 |
| 2857.66345 | 115.431  | 109.6097 | 107.7185 | 102.8552 | 121.3659 |
| 2858.6279  | 115.1124 | 109.3133 | 107.4495 | 102.5979 | 120.9164 |
| 2859.59235 | 114.8117 | 109.0405 | 107.2346 | 102.3105 | 120.5909 |
| 2860.5568  | 114.5162 | 108.7938 | 107.1063 | 102.0541 | 120.3168 |
| 2861.52125 | 114.191  | 108.5152 | 106.9167 | 101.7991 | 119.9483 |
| 2862.4857  | 114.0632 | 108.3172 | 106.7823 | 101.6214 | 119.5808 |
| 2863.45015 | 114.1191 | 108.1887 | 106.7538 | 101.529  | 119.3034 |
| 2864.4146  | 114.0296 | 107.9774 | 106.6561 | 101.3643 | 119.029  |
| 2865.37905 | 113.7656 | 107.6731 | 106.4474 | 101.1243 | 118.6777 |
| 2866.3435  | 113.4576 | 107.3589 | 106.2416 | 100.867  | 118.363  |
| 2867.30795 | 113.0508 | 107.0169 | 106.0236 | 100.5846 | 118.079  |
| 2868.2724  | 112.5953 | 106.6703 | 105.7664 | 100.3089 | 117.7969 |
| 2869.23685 | 112.1771 | 106.3163 | 105.5115 | 100.0405 | 117.4855 |
| 2870.20129 | 111.9979 | 106.0741 | 105.3581 | 99.88262 | 117.2335 |
| 2871.16574 | 112.2435 | 106.0483 | 105.3898 | 99.92882 | 117.0737 |
| 2872.13019 | 112.7046 | 106.1618 | 105.5336 | 100.1014 | 117.0023 |
| 2873.09464 | 113.1312 | 106.3275 | 105.7222 | 100.2681 | 117.0856 |
| 2874.05909 | 113.5102 | 106.5456 | 105.9954 | 100.4479 | 117.2972 |
| 2875.02354 | 113.8291 | 106.7621 | 106.2607 | 100.6247 | 117.4738 |
| 2875.98799 | 114.1007 | 106.9862 | 106.4575 | 100.7966 | 117.6292 |
| 2876.95244 | 114.3698 | 107.2178 | 106.6272 | 100.9843 | 117.8077 |
| 2877.91689 | 114.6023 | 107.4359 | 106.7811 | 101.1626 | 117.9777 |
| 2878.88134 | 114.7998 | 107.625  | 106.919  | 101.3212 | 118.1624 |
| 2879.84579 | 114.9401 | 107.7624 | 107.0104 | 101.4436 | 118.3151 |
| 2880.81024 | 115.045  | 107.8427 | 107.0652 | 101.5215 | 118.4368 |
| 2881.77469 | 115.0898 | 107.8853 | 107.0967 | 101.5717 | 118.5503 |
| 2882.73914 | 115.0661 | 107.8712 | 107.0951 | 101.5922 | 118.6113 |
| 2883.70359 | 115.0622 | 107.8395 | 107.072  | 101.5762 | 118.6107 |
| 2884.66804 | 115.2037 | 107.8129 | 107.0817 | 101.5602 | 118.5666 |
| 2885.63249 | 115.5214 | 107.834  | 107.1762 | 101.617  | 118.5345 |
| 2886.59693 | 115.7693 | 107.8031 | 107.2387 | 101.6506 | 118.4319 |
| 2887.56138 | 115.8402 | 107.6638 | 107.2057 | 101.577  | 118.2263 |
| 2888.52583 | 115.8726 | 107.4557 | 107.1393 | 101.4506 | 117.9765 |
| 2889.49028 | 115.9175 | 107.2219 | 107.0567 | 101.3124 | 117.681  |
| 2890.45473 | 115.8974 | 106.9148 | 106.9495 | 101.1236 | 117.3023 |
| 2891.41918 | 115.8184 | 106.5754 | 106.8125 | 100.8974 | 116.914  |
| 2892.38363 | 115.6996 | 106.2167 | 106.6303 | 100.669  | 116.5139 |
| 2893.34808 | 115.5348 | 105.8329 | 106.4319 | 100.4481 | 116.07   |
| 2894.31253 | 115.3009 | 105.4242 | 106.1664 | 100.1892 | 115.5865 |

|            |          |          |          |          |          |
|------------|----------|----------|----------|----------|----------|
| 2895.27698 | 115.214  | 105.1711 | 105.9943 | 99.99256 | 115.2631 |
| 2896.24143 | 115.3073 | 105.0609 | 106.0375 | 99.91724 | 115.095  |
| 2897.20588 | 115.3618 | 104.9433 | 106.0742 | 99.85081 | 114.9087 |
| 2898.17033 | 115.3308 | 104.7568 | 106.0208 | 99.74795 | 114.6899 |
| 2899.13478 | 115.2189 | 104.5192 | 105.8965 | 99.62316 | 114.4627 |
| 2900.09923 | 115.0773 | 104.2567 | 105.7485 | 99.48628 | 114.2539 |
| 2901.06367 | 114.9851 | 104.0653 | 105.6386 | 99.39169 | 114.1013 |
| 2902.02812 | 114.9113 | 103.9553 | 105.5456 | 99.30402 | 113.9184 |
| 2902.99257 | 114.9059 | 103.8738 | 105.477  | 99.23974 | 113.7599 |
| 2903.95702 | 115.0048 | 103.8119 | 105.4912 | 99.21082 | 113.6581 |
| 2904.92147 | 115.0493 | 103.7101 | 105.4869 | 99.14892 | 113.5116 |
| 2905.88592 | 114.9669 | 103.5192 | 105.3598 | 99.01079 | 113.263  |
| 2906.85037 | 114.8352 | 103.264  | 105.205  | 98.84357 | 112.9761 |
| 2907.81482 | 114.7098 | 102.9629 | 105.039  | 98.67531 | 112.6636 |
| 2908.77927 | 114.6106 | 102.6572 | 104.859  | 98.52348 | 112.3394 |
| 2909.74372 | 114.5285 | 102.3358 | 104.6851 | 98.36919 | 111.9902 |
| 2910.70817 | 114.3875 | 101.9649 | 104.5146 | 98.17161 | 111.6125 |
| 2911.67262 | 114.1519 | 101.5349 | 104.2565 | 97.91966 | 111.1417 |
| 2912.63707 | 114.0075 | 101.1633 | 104.0359 | 97.72825 | 110.715  |
| 2913.60152 | 113.9998 | 100.8814 | 103.9581 | 97.61109 | 110.4137 |
| 2914.56597 | 113.9217 | 100.5628 | 103.8591 | 97.46535 | 110.0867 |
| 2915.53042 | 113.7484 | 100.17   | 103.6588 | 97.2391  | 109.6718 |
| 2916.49487 | 113.6081 | 99.80463 | 103.4956 | 97.02596 | 109.3131 |
| 2917.45931 | 113.5058 | 99.50425 | 103.3516 | 96.82824 | 108.9911 |
| 2918.42376 | 113.5189 | 99.31534 | 103.3199 | 96.67931 | 108.7442 |
| 2919.38821 | 113.4981 | 99.10472 | 103.2971 | 96.52835 | 108.4661 |
| 2920.35266 | 113.3715 | 98.84685 | 103.1617 | 96.33969 | 108.1565 |
| 2921.31711 | 113.2135 | 98.59091 | 103.0138 | 96.13924 | 107.8655 |
| 2922.28156 | 113.0314 | 98.36765 | 102.8509 | 95.93038 | 107.5912 |
| 2923.24601 | 112.8557 | 98.17399 | 102.6967 | 95.72568 | 107.3221 |
| 2924.21046 | 112.7658 | 98.03263 | 102.6064 | 95.56708 | 107.1039 |
| 2925.17491 | 112.7358 | 97.93519 | 102.5649 | 95.4545  | 106.9152 |
| 2926.13936 | 112.6987 | 97.85924 | 102.5123 | 95.36076 | 106.7198 |
| 2927.10381 | 112.6367 | 97.75395 | 102.4144 | 95.25748 | 106.5099 |
| 2928.06826 | 112.5795 | 97.66458 | 102.2914 | 95.16184 | 106.2985 |
| 2929.03271 | 112.6214 | 97.64406 | 102.2318 | 95.07134 | 106.1182 |
| 2929.99716 | 112.7468 | 97.71049 | 102.3325 | 95.02637 | 106.0585 |
| 2930.96161 | 112.7795 | 97.70659 | 102.4085 | 94.96018 | 105.9489 |
| 2931.92605 | 112.7359 | 97.6472  | 102.3953 | 94.86464 | 105.7826 |
| 2932.8905  | 112.6264 | 97.55675 | 102.3309 | 94.72815 | 105.5621 |
| 2933.85495 | 112.544  | 97.46537 | 102.2801 | 94.59113 | 105.3679 |
| 2934.8194  | 112.4426 | 97.36165 | 102.2153 | 94.45055 | 105.1706 |
| 2935.78385 | 112.2396 | 97.20792 | 102.081  | 94.26179 | 104.9236 |
| 2936.7483  | 111.9667 | 97.01115 | 101.8997 | 94.03244 | 104.6366 |
| 2937.71275 | 111.6824 | 96.79781 | 101.7256 | 93.79301 | 104.3639 |
| 2938.6772  | 111.3751 | 96.55632 | 101.5272 | 93.52883 | 104.076  |
| 2939.64165 | 111.0318 | 96.26539 | 101.2844 | 93.2327  | 103.7444 |
| 2940.6061  | 110.6451 | 95.91027 | 101.0121 | 92.89041 | 103.3572 |
| 2941.57055 | 110.2265 | 95.51783 | 100.6821 | 92.54106 | 102.9444 |
| 2942.535   | 109.8498 | 95.15169 | 100.3471 | 92.20846 | 102.5224 |
| 2943.49945 | 109.5709 | 94.83118 | 100.0976 | 91.89549 | 102.1458 |
| 2944.4639  | 109.2782 | 94.45095 | 99.90862 | 91.55362 | 101.7485 |
| 2945.42834 | 108.9374 | 94.072   | 99.66622 | 91.19427 | 101.2996 |
| 2946.3928  | 108.7179 | 93.77048 | 99.45192 | 90.88457 | 100.911  |

|            |          |          |          |          |          |
|------------|----------|----------|----------|----------|----------|
| 2947.35724 | 108.5911 | 93.47953 | 99.35282 | 90.6063  | 100.5861 |
| 2948.32169 | 108.2993 | 93.11692 | 99.16512 | 90.26681 | 100.1667 |
| 2949.28614 | 107.8444 | 92.71756 | 98.9062  | 89.91574 | 99.75188 |
| 2950.25059 | 107.3027 | 92.30418 | 98.59225 | 89.59982 | 99.39446 |
| 2951.21504 | 106.8095 | 91.97407 | 98.25556 | 89.32714 | 99.11679 |
| 2952.17949 | 106.5044 | 91.74137 | 98.07689 | 89.08329 | 98.945   |
| 2953.14394 | 106.3228 | 91.57487 | 98.06123 | 88.92754 | 98.80973 |
| 2954.10839 | 106.097  | 91.4211  | 97.99596 | 88.79088 | 98.68929 |
| 2955.07284 | 105.8409 | 91.3235  | 97.9052  | 88.6898  | 98.6747  |
| 2956.03729 | 105.6287 | 91.30482 | 97.86325 | 88.67154 | 98.75661 |
| 2957.00174 | 105.4574 | 91.37138 | 97.86138 | 88.72374 | 98.96515 |
| 2957.96619 | 105.2506 | 91.46442 | 97.85991 | 88.77289 | 99.23211 |
| 2958.93064 | 105.0459 | 91.6322  | 97.8729  | 88.87378 | 99.5933  |
| 2959.89509 | 104.8473 | 91.88149 | 97.91866 | 89.04254 | 100.0496 |
| 2960.85954 | 104.6283 | 92.18273 | 97.97298 | 89.25652 | 100.5929 |
| 2961.82399 | 104.5218 | 92.59603 | 98.08634 | 89.50368 | 101.2723 |
| 2962.78843 | 104.6143 | 93.13331 | 98.38194 | 89.87664 | 102.0808 |
| 2963.75288 | 104.846  | 93.76213 | 98.74911 | 90.36332 | 102.9344 |
| 2964.71733 | 105.1911 | 94.50131 | 99.154   | 90.90364 | 103.8732 |
| 2965.68178 | 105.6238 | 95.28402 | 99.60466 | 91.48856 | 104.8622 |
| 2966.64623 | 106.1197 | 96.09809 | 100.0914 | 92.13222 | 105.9103 |
| 2967.61068 | 106.6532 | 96.95313 | 100.6201 | 92.81193 | 106.9835 |
| 2968.57513 | 107.2529 | 97.86094 | 101.1834 | 93.51606 | 108.0762 |
| 2969.53958 | 107.8682 | 98.7656  | 101.742  | 94.23183 | 109.1493 |
| 2970.50403 | 108.4615 | 99.64479 | 102.2817 | 94.95743 | 110.2124 |
| 2971.46848 | 109.0511 | 100.5034 | 102.8008 | 95.66236 | 111.2406 |
| 2972.43293 | 109.6263 | 101.3504 | 103.3318 | 96.34757 | 112.206  |
| 2973.39738 | 110.1909 | 102.1675 | 103.8079 | 96.9706  | 113.1031 |
| 2974.36183 | 110.7441 | 102.9337 | 104.2709 | 97.54682 | 114.0236 |
| 2975.32628 | 111.0751 | 103.5568 | 104.6946 | 98.04452 | 114.881  |
| 2976.29072 | 111.021  | 104.0038 | 104.8711 | 98.38847 | 115.5928 |
| 2977.25517 | 110.4822 | 104.2139 | 104.7549 | 98.47412 | 116.1374 |
| 2978.21962 | 109.1902 | 104.0311 | 104.2564 | 98.15968 | 116.5048 |
| 2979.18407 | 106.5753 | 103.1733 | 103.1572 | 97.25198 | 116.5894 |
| 2980.14852 | 102.1229 | 101.417  | 101.1761 | 95.51414 | 116.2189 |
| 2981.11297 | 97.03692 | 99.40237 | 98.75682 | 93.3636  | 115.7221 |
| 2982.07742 | 95.52947 | 99.1682  | 98.03729 | 92.71582 | 116.0844 |
| 2983.04187 | 99.92651 | 101.7877 | 100.4405 | 94.98408 | 117.7846 |
| 2984.00632 | 105.8377 | 105.0698 | 103.6869 | 98.12236 | 119.7702 |
| 2984.97077 | 109.952  | 107.4242 | 105.961  | 100.3619 | 121.2966 |
| 2985.93522 | 112.802  | 109.1625 | 107.5602 | 101.9672 | 122.5091 |
| 2986.89967 | 114.9333 | 110.5419 | 108.7578 | 103.1996 | 123.4892 |
| 2987.86412 | 116.4384 | 111.5939 | 109.6275 | 104.1337 | 124.3178 |
| 2988.82857 | 117.2661 | 112.2669 | 110.1347 | 104.7467 | 124.9868 |
| 2989.79302 | 117.6111 | 112.7308 | 110.3995 | 105.1335 | 125.5009 |
| 2990.75747 | 117.7339 | 113.1773 | 110.5648 | 105.3941 | 125.8732 |
| 2991.72192 | 117.932  | 113.6533 | 110.7695 | 105.6567 | 126.33   |
| 2992.68636 | 118.2207 | 114.1205 | 111.0953 | 105.962  | 126.8954 |
| 2993.65081 | 118.5027 | 114.5885 | 111.4564 | 106.2965 | 127.4165 |
| 2994.61526 | 118.7603 | 115.015  | 111.6951 | 106.584  | 127.8477 |
| 2995.57971 | 118.9981 | 115.351  | 111.8325 | 106.8254 | 128.2077 |
| 2996.54416 | 119.3914 | 115.767  | 112.0303 | 107.1526 | 128.6235 |
| 2997.50861 | 120.0393 | 116.3697 | 112.4588 | 107.6266 | 129.268  |
| 2998.47306 | 120.7048 | 117.0192 | 112.9657 | 108.1011 | 129.9091 |

|            |          |          |          |          |          |
|------------|----------|----------|----------|----------|----------|
| 2999.43751 | 121.3387 | 117.6249 | 113.3953 | 108.5247 | 130.4684 |
| 3000.40196 | 122.0333 | 118.2397 | 113.8216 | 108.9681 | 131.0281 |
| 3001.36641 | 122.7468 | 118.8374 | 114.2507 | 109.4223 | 131.538  |
| 3002.33086 | 123.4615 | 119.4114 | 114.6676 | 109.8881 | 131.991  |
| 3003.29531 | 124.3084 | 120.0897 | 115.2019 | 110.415  | 132.5156 |
| 3004.25976 | 125.1856 | 120.8094 | 115.7517 | 110.9328 | 133.0546 |
| 3005.22421 | 126.0052 | 121.4385 | 116.1905 | 111.4038 | 133.5613 |
| 3006.18865 | 126.7934 | 122.0053 | 116.6192 | 111.8941 | 134.0571 |
| 3007.1531  | 127.5457 | 122.5379 | 117.0362 | 112.3626 | 134.4953 |
| 3008.11755 | 128.1966 | 123.0039 | 117.3807 | 112.7677 | 134.7934 |
| 3009.082   | 128.7332 | 123.3907 | 117.6577 | 113.104  | 134.926  |
| 3010.04645 | 129.3159 | 123.8191 | 117.9337 | 113.3961 | 135.0943 |
| 3011.0109  | 129.951  | 124.2716 | 118.3056 | 113.743  | 135.3857 |
| 3011.97535 | 130.5238 | 124.6932 | 118.6925 | 114.1018 | 135.6196 |
| 3012.9398  | 131.1237 | 125.1143 | 118.942  | 114.3708 | 135.8981 |
| 3013.90425 | 131.7446 | 125.5154 | 119.2404 | 114.7218 | 136.3075 |
| 3014.8687  | 132.3004 | 125.9391 | 119.6335 | 115.133  | 136.666  |
| 3015.83315 | 132.821  | 126.3361 | 119.9299 | 115.4336 | 136.9641 |
| 3016.7976  | 133.354  | 126.7027 | 120.2111 | 115.7049 | 137.3245 |
| 3017.76205 | 133.7574 | 126.9953 | 120.4532 | 115.9384 | 137.5693 |
| 3018.7265  | 134.145  | 127.3006 | 120.6467 | 116.1273 | 137.777  |
| 3019.69095 | 134.6328 | 127.6769 | 120.954  | 116.3837 | 138.1088 |
| 3020.6554  | 135.0831 | 128.0484 | 121.2741 | 116.6527 | 138.4195 |
| 3021.61985 | 135.3702 | 128.3006 | 121.4871 | 116.858  | 138.6022 |
| 3022.58429 | 135.4504 | 128.3441 | 121.4745 | 116.8963 | 138.603  |
| 3023.54874 | 135.55   | 128.3827 | 121.4404 | 116.9151 | 138.5985 |
| 3024.51319 | 135.9113 | 128.6786 | 121.711  | 117.1164 | 138.8265 |
| 3025.47764 | 136.309  | 129.0525 | 122.065  | 117.3698 | 139.123  |
| 3026.44209 | 136.5545 | 129.2602 | 122.2161 | 117.5109 | 139.3213 |
| 3027.40654 | 136.6363 | 129.3205 | 122.2441 | 117.5974 | 139.376  |
| 3028.37099 | 136.6241 | 129.305  | 122.1858 | 117.5957 | 139.293  |
| 3029.33544 | 136.7122 | 129.3667 | 122.2692 | 117.6547 | 139.2701 |
| 3030.29989 | 136.8296 | 129.5241 | 122.5143 | 117.7912 | 139.2341 |
| 3031.26434 | 136.8018 | 129.5419 | 122.488  | 117.7403 | 139.0639 |
| 3032.22879 | 136.7759 | 129.4441 | 122.2725 | 117.6025 | 138.9975 |
| 3033.19324 | 136.7807 | 129.3657 | 122.2435 | 117.6416 | 139.0077 |
| 3034.15769 | 136.9098 | 129.487  | 122.3399 | 117.7318 | 139.078  |
| 3035.12214 | 137.2558 | 129.806  | 122.561  | 117.9101 | 139.4161 |
| 3036.08659 | 137.5502 | 130.0645 | 122.8018 | 118.1301 | 139.7654 |
| 3037.05104 | 137.6463 | 130.1613 | 122.8843 | 118.2394 | 139.8917 |
| 3038.01548 | 137.5402 | 130.063  | 122.7927 | 118.2139 | 139.7869 |
| 3038.97993 | 137.383  | 129.8861 | 122.5968 | 118.0894 | 139.5794 |
| 3039.94438 | 137.344  | 129.8094 | 122.5001 | 118.0177 | 139.4925 |
| 3040.90883 | 137.3422 | 129.7814 | 122.4795 | 117.9805 | 139.4725 |
| 3041.87328 | 137.4282 | 129.8227 | 122.5072 | 118.0061 | 139.5232 |
| 3042.83773 | 137.5908 | 129.9554 | 122.6398 | 118.1094 | 139.661  |
| 3043.80218 | 137.6208 | 129.9903 | 122.6645 | 118.136  | 139.6742 |
| 3044.76663 | 137.7771 | 130.1208 | 122.7535 | 118.2029 | 139.7862 |
| 3045.73108 | 138.1031 | 130.4195 | 123.0279 | 118.3936 | 140.0782 |
| 3046.69553 | 138.2927 | 130.615  | 123.2322 | 118.5371 | 140.2423 |
| 3047.65998 | 138.232  | 130.5899 | 123.2757 | 118.5612 | 140.1269 |
| 3048.62443 | 138.038  | 130.4282 | 123.1401 | 118.44   | 139.8558 |
| 3049.58888 | 137.939  | 130.2893 | 122.9629 | 118.3118 | 139.7213 |
| 3050.55333 | 138.0973 | 130.3788 | 123.0467 | 118.4189 | 139.8824 |

|            |          |          |          |          |          |
|------------|----------|----------|----------|----------|----------|
| 3051.51777 | 138.3785 | 130.6544 | 123.3075 | 118.6418 | 140.1684 |
| 3052.48222 | 138.3991 | 130.7103 | 123.3527 | 118.6915 | 140.1928 |
| 3053.44667 | 138.3181 | 130.6017 | 123.2596 | 118.627  | 140.0823 |
| 3054.41112 | 138.3946 | 130.6632 | 123.345  | 118.668  | 140.1163 |
| 3055.37557 | 138.3745 | 130.7067 | 123.4507 | 118.7045 | 140.0223 |
| 3056.34002 | 138.4457 | 130.782  | 123.4555 | 118.6638 | 140.018  |
| 3057.30447 | 138.7351 | 131.0002 | 123.579  | 118.7631 | 140.3558 |
| 3058.26892 | 138.911  | 131.1354 | 123.7433 | 118.9513 | 140.5922 |
| 3059.23337 | 138.9251 | 131.1668 | 123.8071 | 119.0025 | 140.6129 |
| 3060.19782 | 138.9074 | 131.1654 | 123.7729 | 118.972  | 140.6126 |
| 3061.16227 | 138.8565 | 131.1143 | 123.6766 | 118.9249 | 140.6034 |
| 3062.12672 | 138.8153 | 131.0394 | 123.6112 | 118.8947 | 140.5424 |
| 3063.09117 | 138.8707 | 131.0831 | 123.7321 | 118.9432 | 140.5039 |
| 3064.05562 | 138.8349 | 131.0998 | 123.7861 | 118.9188 | 140.3395 |
| 3065.02007 | 138.636  | 130.9244 | 123.5238 | 118.7214 | 140.1251 |
| 3065.98452 | 138.4422 | 130.7192 | 123.3888 | 118.6642 | 139.9433 |
| 3066.94897 | 138.5654 | 130.8121 | 123.4621 | 118.7141 | 140.0047 |
| 3067.91341 | 138.8909 | 131.064  | 123.6531 | 118.8919 | 140.3629 |
| 3068.87786 | 139.0522 | 131.2227 | 123.827  | 119.0909 | 140.6032 |
| 3069.84231 | 139.0771 | 131.28   | 123.8704 | 119.145  | 140.6453 |
| 3070.80676 | 139.1373 | 131.3452 | 123.9358 | 119.1925 | 140.7134 |
| 3071.77121 | 139.1868 | 131.3972 | 123.9995 | 119.2485 | 140.7799 |
| 3072.73566 | 139.1841 | 131.4075 | 123.9951 | 119.2579 | 140.7735 |
| 3073.70011 | 139.1264 | 131.3695 | 123.9472 | 119.2426 | 140.7123 |
| 3074.66456 | 138.9504 | 131.2142 | 123.8128 | 119.154  | 140.55   |
| 3075.62901 | 138.7093 | 130.9681 | 123.5895 | 118.9703 | 140.2787 |
| 3076.59346 | 138.5823 | 130.826  | 123.488  | 118.8597 | 140.1145 |
| 3077.55791 | 138.6233 | 130.8596 | 123.5299 | 118.8582 | 140.092  |
| 3078.52236 | 138.6509 | 130.9198 | 123.5768 | 118.87   | 140.0775 |
| 3079.48681 | 138.6943 | 130.987  | 123.5938 | 118.8615 | 140.125  |
| 3080.45126 | 138.8684 | 131.1435 | 123.7006 | 118.9437 | 140.3691 |
| 3081.4157  | 138.9488 | 131.2337 | 123.8195 | 119.0624 | 140.5053 |
| 3082.38015 | 138.851  | 131.1507 | 123.7072 | 119.0035 | 140.4161 |
| 3083.3446  | 138.8667 | 131.1302 | 123.6398 | 118.9832 | 140.4543 |
| 3084.30905 | 139.0649 | 131.3017 | 123.8156 | 119.1478 | 140.705  |
| 3085.2735  | 139.1789 | 131.4299 | 123.9518 | 119.2737 | 140.8424 |
| 3086.23795 | 139.248  | 131.5168 | 124.0037 | 119.3189 | 140.8974 |
| 3087.2024  | 139.3167 | 131.5875 | 124.0779 | 119.3882 | 140.9555 |
| 3088.16685 | 139.1842 | 131.4826 | 123.9882 | 119.3438 | 140.8485 |
| 3089.1313  | 139.053  | 131.3551 | 123.8635 | 119.2689 | 140.7311 |
| 3090.09575 | 139.2304 | 131.4881 | 123.9783 | 119.3613 | 140.8854 |
| 3091.0602  | 139.5451 | 131.7954 | 124.2745 | 119.5858 | 141.2188 |
| 3092.02465 | 139.7221 | 132.0199 | 124.4738 | 119.7385 | 141.4055 |
| 3092.9891  | 139.7814 | 132.1106 | 124.5596 | 119.7908 | 141.4418 |
| 3093.95355 | 139.8003 | 132.1592 | 124.6218 | 119.8122 | 141.4479 |
| 3094.918   | 139.7781 | 132.1873 | 124.7032 | 119.8444 | 141.4076 |
| 3095.88245 | 139.8038 | 132.2327 | 124.7051 | 119.7987 | 141.3929 |
| 3096.8469  | 139.7471 | 132.149  | 124.5487 | 119.7002 | 141.4272 |
| 3097.81134 | 139.5178 | 131.8851 | 124.3157 | 119.6026 | 141.3024 |
| 3098.77579 | 139.3886 | 131.7569 | 124.2258 | 119.5457 | 141.1502 |
| 3099.74024 | 139.5233 | 131.9091 | 124.357  | 119.5984 | 141.2184 |
| 3100.70469 | 139.8032 | 132.208  | 124.6183 | 119.7427 | 141.4639 |
| 3101.66914 | 139.9643 | 132.3838 | 124.7485 | 119.8192 | 141.6495 |
| 3102.63359 | 139.9971 | 132.4097 | 124.7573 | 119.8709 | 141.7442 |

|            |          |          |          |          |          |
|------------|----------|----------|----------|----------|----------|
| 3103.59804 | 140.0155 | 132.4123 | 124.7151 | 119.898  | 141.816  |
| 3104.56249 | 139.981  | 132.3576 | 124.6683 | 119.904  | 141.8283 |
| 3105.52694 | 139.8605 | 132.2355 | 124.611  | 119.882  | 141.7237 |
| 3106.49139 | 139.585  | 131.9733 | 124.4335 | 119.747  | 141.4289 |
| 3107.45584 | 139.3815 | 131.7812 | 124.2209 | 119.5784 | 141.1663 |
| 3108.42029 | 139.5179 | 131.8877 | 124.2888 | 119.6302 | 141.2767 |
| 3109.38474 | 139.784  | 132.1435 | 124.5735 | 119.8443 | 141.5312 |
| 3110.34919 | 139.8989 | 132.2862 | 124.7176 | 119.9533 | 141.645  |
| 3111.31364 | 139.8625 | 132.2753 | 124.7199 | 119.9639 | 141.6534 |
| 3112.27808 | 139.7211 | 132.1678 | 124.5986 | 119.8862 | 141.5342 |
| 3113.24253 | 139.4738 | 131.9482 | 124.4046 | 119.7418 | 141.2887 |
| 3114.20698 | 139.2615 | 131.7395 | 124.2816 | 119.6169 | 141.0347 |
| 3115.17143 | 139.2047 | 131.7168 | 124.2844 | 119.5578 | 140.8991 |
| 3116.13588 | 139.2877 | 131.8007 | 124.2495 | 119.4941 | 140.96   |
| 3117.10033 | 139.3208 | 131.8121 | 124.2401 | 119.5228 | 141.0743 |
| 3118.06478 | 139.272  | 131.769  | 124.2737 | 119.5745 | 141.0298 |
| 3119.02923 | 139.3334 | 131.8237 | 124.217  | 119.5281 | 141.0656 |
| 3119.99368 | 139.5561 | 131.9772 | 124.2964 | 119.6161 | 141.3622 |
| 3120.95813 | 139.8293 | 132.2209 | 124.6275 | 119.8754 | 141.6735 |
| 3121.92258 | 140.0507 | 132.505  | 124.9675 | 120.0817 | 141.808  |
| 3122.88703 | 140.2312 | 132.7086 | 125.0472 | 120.0954 | 141.9754 |
| 3123.85148 | 140.2824 | 132.7096 | 125.0196 | 120.1123 | 142.1287 |
| 3124.81593 | 140.2832 | 132.6991 | 125.0793 | 120.2244 | 142.1444 |
| 3125.78038 | 140.252  | 132.7056 | 125.1266 | 120.2776 | 142.0583 |
| 3126.74483 | 140.2038 | 132.6698 | 125.0553 | 120.2264 | 141.9832 |
| 3127.70927 | 140.0267 | 132.474  | 124.8439 | 120.1045 | 141.8394 |
| 3128.67372 | 139.9008 | 132.3199 | 124.694  | 120.0484 | 141.7174 |
| 3129.63817 | 140.091  | 132.4584 | 124.8241 | 120.1504 | 141.8723 |
| 3130.60262 | 140.2763 | 132.6208 | 125.0288 | 120.2713 | 142.0439 |
| 3131.56707 | 140.2753 | 132.6647 | 125.1777 | 120.3353 | 142.0268 |
| 3132.53152 | 140.2712 | 132.7462 | 125.3044 | 120.3853 | 141.9521 |
| 3133.49597 | 140.3243 | 132.8139 | 125.2522 | 120.3279 | 142.0082 |
| 3134.46042 | 140.2783 | 132.7165 | 125.1132 | 120.298  | 142.0706 |
| 3135.42487 | 140.1289 | 132.5479 | 125.0025 | 120.2555 | 141.998  |
| 3136.38932 | 139.8675 | 132.3185 | 124.7887 | 120.0934 | 141.7793 |
| 3137.35377 | 139.6793 | 132.1482 | 124.5808 | 119.9716 | 141.6028 |
| 3138.31822 | 139.6889 | 132.1431 | 124.5162 | 119.9383 | 141.5951 |
| 3139.28267 | 139.9386 | 132.3323 | 124.6907 | 120.0597 | 141.8268 |
| 3140.24712 | 140.2617 | 132.6079 | 124.9883 | 120.2724 | 142.1484 |
| 3141.21157 | 140.4348 | 132.7812 | 125.1807 | 120.4025 | 142.3101 |
| 3142.17602 | 140.4781 | 132.8443 | 125.2516 | 120.4359 | 142.3296 |
| 3143.14046 | 140.492  | 132.8646 | 125.2701 | 120.4295 | 142.3297 |
| 3144.10491 | 140.5025 | 132.8454 | 125.2646 | 120.4352 | 142.3227 |
| 3145.06936 | 140.478  | 132.8191 | 125.2335 | 120.4414 | 142.2722 |
| 3146.03381 | 140.4638 | 132.821  | 125.2412 | 120.4415 | 142.2417 |
| 3146.99826 | 140.4297 | 132.7795 | 125.2498 | 120.4505 | 142.1933 |
| 3147.96271 | 140.3717 | 132.7159 | 125.1959 | 120.4473 | 142.1212 |
| 3148.92716 | 140.2444 | 132.6123 | 125.0952 | 120.3952 | 142.0031 |
| 3149.89161 | 139.9796 | 132.4012 | 124.9088 | 120.256  | 141.7433 |
| 3150.85606 | 139.7487 | 132.1989 | 124.7146 | 120.1022 | 141.4791 |
| 3151.82051 | 139.7808 | 132.2076 | 124.7102 | 120.0948 | 141.4857 |
| 3152.78496 | 140.0378 | 132.3974 | 124.9045 | 120.2387 | 141.7421 |
| 3153.74941 | 140.2625 | 132.5856 | 125.1021 | 120.3886 | 141.9776 |
| 3154.71386 | 140.4247 | 132.7409 | 125.2494 | 120.4727 | 142.1326 |

|            |          |          |          |          |          |
|------------|----------|----------|----------|----------|----------|
| 3155.67831 | 140.5188 | 132.8238 | 125.3414 | 120.5085 | 142.2163 |
| 3156.64275 | 140.556  | 132.8648 | 125.3697 | 120.5505 | 142.2615 |
| 3157.6072  | 140.6149 | 132.9264 | 125.4065 | 120.5888 | 142.342  |
| 3158.57165 | 140.6733 | 132.9881 | 125.4646 | 120.6094 | 142.4207 |
| 3159.5361  | 140.7101 | 132.9976 | 125.4694 | 120.6089 | 142.4344 |
| 3160.50055 | 140.7423 | 132.9907 | 125.4688 | 120.6068 | 142.4057 |
| 3161.465   | 140.7547 | 132.9954 | 125.4752 | 120.6088 | 142.4063 |
| 3162.42945 | 140.7375 | 132.9913 | 125.4924 | 120.615  | 142.407  |
| 3163.3939  | 140.701  | 132.966  | 125.4873 | 120.5995 | 142.3693 |
| 3164.35835 | 140.713  | 132.9686 | 125.5051 | 120.6253 | 142.331  |
| 3165.3228  | 140.7614 | 132.9899 | 125.5504 | 120.665  | 142.3374 |
| 3166.28725 | 140.7757 | 132.9925 | 125.5782 | 120.6777 | 142.3254 |
| 3167.2517  | 140.7899 | 133.0095 | 125.6143 | 120.7038 | 142.308  |
| 3168.21615 | 140.8014 | 133.0154 | 125.6559 | 120.7287 | 142.2759 |
| 3169.1806  | 140.7817 | 133.0127 | 125.6701 | 120.7451 | 142.24   |
| 3170.14505 | 140.759  | 132.9817 | 125.6508 | 120.7348 | 142.2251 |
| 3171.1095  | 140.7686 | 132.9696 | 125.6461 | 120.7418 | 142.2318 |
| 3172.07395 | 140.7891 | 132.9813 | 125.6723 | 120.7551 | 142.2363 |
| 3173.03839 | 140.7985 | 132.9976 | 125.6884 | 120.7575 | 142.2337 |
| 3174.00284 | 140.8076 | 133.0265 | 125.686  | 120.7806 | 142.2574 |
| 3174.96729 | 140.8574 | 133.0643 | 125.7082 | 120.8003 | 142.3068 |
| 3175.93174 | 140.8962 | 133.0909 | 125.7493 | 120.798  | 142.3316 |
| 3176.89619 | 140.8327 | 133.0816 | 125.8269 | 120.814  | 142.2217 |
| 3177.86064 | 140.8277 | 133.1104 | 125.8529 | 120.7735 | 142.1294 |
| 3178.82509 | 140.8862 | 133.1334 | 125.7422 | 120.6769 | 142.2247 |
| 3179.78954 | 140.8841 | 133.0636 | 125.6992 | 120.7133 | 142.3173 |
| 3180.75399 | 140.8851 | 133.038  | 125.6923 | 120.7472 | 142.3157 |
| 3181.71844 | 140.9057 | 133.0569 | 125.6984 | 120.7557 | 142.3212 |
| 3182.68289 | 140.939  | 133.0621 | 125.7431 | 120.7776 | 142.3213 |
| 3183.64734 | 140.935  | 133.0647 | 125.8254 | 120.8199 | 142.2482 |
| 3184.61179 | 140.9461 | 133.1054 | 125.8988 | 120.8675 | 142.1643 |
| 3185.57624 | 140.9571 | 133.1062 | 125.8593 | 120.8356 | 142.1378 |
| 3186.54068 | 140.8756 | 133.0222 | 125.7699 | 120.8103 | 142.1162 |
| 3187.50513 | 140.7701 | 132.9367 | 125.6924 | 120.8059 | 142.0456 |
| 3188.46958 | 140.7875 | 132.953  | 125.7029 | 120.8239 | 142.0406 |
| 3189.43403 | 140.8723 | 132.9918 | 125.8145 | 120.879  | 142.0838 |
| 3190.39848 | 140.8585 | 132.9546 | 125.8318 | 120.8764 | 142.0318 |
| 3191.36293 | 140.8138 | 132.9228 | 125.79   | 120.8555 | 141.9779 |
| 3192.32738 | 140.8565 | 132.9506 | 125.7907 | 120.8613 | 142.0128 |
| 3193.29183 | 140.9263 | 132.9829 | 125.8411 | 120.8901 | 142.0487 |
| 3194.25628 | 140.9671 | 133.0192 | 125.8721 | 120.9025 | 142.0633 |
| 3195.22073 | 141.0206 | 133.0933 | 125.9445 | 120.9461 | 142.0896 |
| 3196.18518 | 141.0269 | 133.1156 | 125.9969 | 120.9574 | 142.0488 |
| 3197.14963 | 141.0088 | 133.1196 | 126.0455 | 120.9433 | 141.9539 |
| 3198.11408 | 141.0201 | 133.1399 | 125.9929 | 120.8678 | 141.9622 |
| 3199.07853 | 141.0056 | 133.0834 | 125.8979 | 120.8433 | 142.0229 |
| 3200.04298 | 140.9581 | 133.0351 | 125.8541 | 120.8641 | 142.0043 |
| 3201.00743 | 140.92   | 132.9941 | 125.8062 | 120.8501 | 141.9489 |
| 3201.97188 | 140.9544 | 132.9667 | 125.8316 | 120.8632 | 141.9421 |
| 3202.93633 | 140.969  | 132.9504 | 125.8678 | 120.8846 | 141.914  |
| 3203.90077 | 140.9326 | 132.9544 | 125.87   | 120.8993 | 141.8733 |
| 3204.86522 | 140.8556 | 132.8874 | 125.8189 | 120.8753 | 141.7912 |
| 3205.82967 | 140.8772 | 132.8813 | 125.8366 | 120.8821 | 141.7586 |
| 3206.79412 | 140.9821 | 132.966  | 125.9526 | 120.9518 | 141.7995 |

|            |          |          |          |          |          |
|------------|----------|----------|----------|----------|----------|
| 3207.75857 | 141.0243 | 133.0102 | 126.0525 | 121.0074 | 141.7729 |
| 3208.72302 | 140.9912 | 133.0034 | 126.13   | 121.0235 | 141.6284 |
| 3209.68747 | 140.9875 | 133.0408 | 126.124  | 120.9649 | 141.5339 |
| 3210.65192 | 141.0246 | 133.0367 | 126.046  | 120.92   | 141.5965 |
| 3211.61637 | 140.9787 | 132.9422 | 125.9955 | 120.9443 | 141.5999 |
| 3212.58082 | 140.8641 | 132.8595 | 125.9845 | 120.9394 | 141.461  |
| 3213.54527 | 140.8481 | 132.9077 | 126.042  | 120.9356 | 141.3523 |
| 3214.50972 | 140.9887 | 133.0201 | 126.0346 | 120.8712 | 141.434  |
| 3215.47417 | 141.0001 | 132.9669 | 125.9854 | 120.8662 | 141.5118 |
| 3216.43862 | 140.8991 | 132.8649 | 125.9233 | 120.8582 | 141.4613 |
| 3217.40307 | 140.7982 | 132.7708 | 125.8158 | 120.797  | 141.3905 |
| 3218.36751 | 140.8342 | 132.7928 | 125.8902 | 120.8455 | 141.3578 |
| 3219.33196 | 140.9566 | 132.9219 | 126.0545 | 120.8603 | 141.3569 |
| 3220.29641 | 141.0375 | 132.9607 | 126.0682 | 120.8273 | 141.4008 |
| 3221.26086 | 141.038  | 132.9012 | 126.0473 | 120.8687 | 141.4079 |
| 3222.22531 | 141.0267 | 132.8734 | 126.0357 | 120.8847 | 141.3761 |
| 3223.18976 | 141.0319 | 132.8539 | 126.0306 | 120.8847 | 141.3523 |
| 3224.15421 | 141.0549 | 132.8488 | 126.0522 | 120.9246 | 141.3165 |
| 3225.11866 | 141.0611 | 132.8365 | 126.0712 | 120.9394 | 141.2571 |
| 3226.08311 | 141.0398 | 132.8107 | 126.1127 | 120.9458 | 141.1517 |
| 3227.04756 | 141.0125 | 132.7843 | 126.1308 | 120.9202 | 141.0387 |
| 3228.01201 | 140.9715 | 132.7458 | 126.0855 | 120.8765 | 140.9596 |
| 3228.97646 | 140.8665 | 132.6399 | 126.0252 | 120.8755 | 140.8378 |
| 3229.94091 | 140.7083 | 132.5043 | 125.8886 | 120.7699 | 140.6733 |
| 3230.90536 | 140.4443 | 132.295  | 125.6567 | 120.5952 | 140.4624 |
| 3231.8698  | 140.2129 | 132.0903 | 125.4493 | 120.4832 | 140.1973 |
| 3232.83426 | 140.2846 | 132.1126 | 125.433  | 120.47   | 140.1747 |
| 3233.7987  | 140.5949 | 132.3069 | 125.5965 | 120.5763 | 140.4501 |
| 3234.76315 | 140.8349 | 132.4645 | 125.8136 | 120.7233 | 140.649  |
| 3235.7276  | 140.9195 | 132.5411 | 125.9564 | 120.8138 | 140.6606 |
| 3236.69205 | 140.9607 | 132.5873 | 125.9676 | 120.7831 | 140.6578 |
| 3237.6565  | 140.979  | 132.5774 | 125.9232 | 120.7476 | 140.71   |
| 3238.62095 | 140.9505 | 132.5413 | 125.9427 | 120.7701 | 140.702  |
| 3239.5854  | 140.9319 | 132.5319 | 125.9743 | 120.762  | 140.6346 |
| 3240.54985 | 140.9693 | 132.5207 | 125.9485 | 120.7198 | 140.5806 |
| 3241.5143  | 141.0155 | 132.5089 | 125.9585 | 120.7167 | 140.5544 |
| 3242.47875 | 140.9707 | 132.4511 | 125.9714 | 120.7155 | 140.4748 |
| 3243.4432  | 140.7681 | 132.3082 | 125.9491 | 120.7037 | 140.2211 |
| 3244.40765 | 140.5171 | 132.1589 | 125.8646 | 120.6129 | 139.8708 |
| 3245.3721  | 140.3727 | 132.0294 | 125.592  | 120.3781 | 139.658  |
| 3246.33655 | 140.3924 | 131.9322 | 125.4636 | 120.3266 | 139.7059 |
| 3247.301   | 140.631  | 132.0458 | 125.6746 | 120.5118 | 139.9007 |
| 3248.26544 | 140.835  | 132.1802 | 125.8839 | 120.6629 | 140.0332 |
| 3249.22989 | 140.9054 | 132.2219 | 125.9736 | 120.7147 | 140.0453 |
| 3250.19434 | 140.9321 | 132.2151 | 125.9961 | 120.7071 | 140.0042 |
| 3251.15879 | 140.9504 | 132.2094 | 126.0038 | 120.7016 | 139.9668 |
| 3252.12324 | 140.8959 | 132.1612 | 125.9922 | 120.6592 | 139.8705 |
| 3253.08769 | 140.69   | 132.0148 | 125.9613 | 120.6013 | 139.6331 |
| 3254.05214 | 140.487  | 131.858  | 125.7473 | 120.4089 | 139.3608 |
| 3255.01659 | 140.5604 | 131.8448 | 125.6028 | 120.2924 | 139.4159 |
| 3255.98104 | 140.7961 | 131.994  | 125.8225 | 120.4802 | 139.6541 |
| 3256.94549 | 140.9476 | 132.1215 | 125.9966 | 120.6086 | 139.7536 |
| 3257.90994 | 140.9867 | 132.1194 | 125.9733 | 120.5955 | 139.7456 |
| 3258.87439 | 140.9711 | 132.0723 | 125.9675 | 120.6056 | 139.696  |



|            |          |          |          |          |          |
|------------|----------|----------|----------|----------|----------|
| 3259.83884 | 140.9509 | 132.0435 | 125.9877 | 120.5909 | 139.6147 |
| 3260.80329 | 140.9537 | 132.0164 | 125.9395 | 120.5388 | 139.5481 |
| 3261.76774 | 140.9389 | 131.9433 | 125.9076 | 120.5271 | 139.5103 |
| 3262.73218 | 140.9087 | 131.8835 | 125.9168 | 120.5243 | 139.4172 |
| 3263.69663 | 140.8603 | 131.8534 | 125.9367 | 120.513  | 139.3155 |
| 3264.66108 | 140.8181 | 131.8044 | 125.9449 | 120.5084 | 139.2221 |
| 3265.62553 | 140.7761 | 131.7373 | 125.9082 | 120.4703 | 139.1324 |
| 3266.58998 | 140.6545 | 131.608  | 125.7991 | 120.4006 | 138.9991 |
| 3267.55443 | 140.3947 | 131.3616 | 125.5888 | 120.2715 | 138.7556 |
| 3268.51888 | 140.0583 | 131.0497 | 125.2993 | 120.0688 | 138.4    |
| 3269.48333 | 139.8713 | 130.8747 | 125.1017 | 119.9105 | 138.162  |
| 3270.44778 | 139.9836 | 130.9276 | 125.1429 | 119.9196 | 138.2    |
| 3271.41223 | 140.2528 | 131.0969 | 125.373  | 120.058  | 138.4028 |
| 3272.37668 | 140.3482 | 131.186  | 125.6086 | 120.1725 | 138.4024 |
| 3273.34113 | 140.2639 | 131.1423 | 125.5942 | 120.0852 | 138.2056 |
| 3274.30558 | 140.3506 | 131.1712 | 125.5058 | 119.9702 | 138.2482 |
| 3275.27003 | 140.5322 | 131.2758 | 125.7095 | 120.1254 | 138.4128 |
| 3276.23448 | 140.6912 | 131.4004 | 125.8641 | 120.2072 | 138.4315 |
| 3277.19893 | 140.7541 | 131.4059 | 125.7872 | 120.1507 | 138.4754 |
| 3278.16338 | 140.691  | 131.2747 | 125.7358 | 120.1656 | 138.4726 |
| 3279.12782 | 140.595  | 131.1528 | 125.6833 | 120.1394 | 138.357  |
| 3280.09227 | 140.6382 | 131.1547 | 125.6799 | 120.1215 | 138.3379 |
| 3281.05672 | 140.6915 | 131.1597 | 125.7352 | 120.1194 | 138.3624 |
| 3282.02117 | 140.6323 | 131.0843 | 125.7774 | 120.1256 | 138.2613 |
| 3282.98562 | 140.5533 | 131.0025 | 125.7548 | 120.0748 | 138.0701 |
| 3283.95007 | 140.5258 | 130.9428 | 125.6759 | 120.0147 | 137.9489 |
| 3284.91452 | 140.5541 | 130.9114 | 125.666  | 120.0213 | 137.9301 |
| 3285.87897 | 140.5268 | 130.8345 | 125.653  | 120.011  | 137.8695 |
| 3286.84342 | 140.4516 | 130.7604 | 125.6346 | 119.9798 | 137.7633 |
| 3287.80787 | 140.3837 | 130.6927 | 125.6448 | 119.9457 | 137.6221 |
| 3288.77232 | 140.2288 | 130.5529 | 125.4988 | 119.8107 | 137.4279 |
| 3289.73677 | 139.8901 | 130.2507 | 125.1972 | 119.5916 | 137.099  |
| 3290.70122 | 139.6587 | 130.0399 | 125.0265 | 119.4653 | 136.8168 |
| 3291.66567 | 139.7317 | 130.0857 | 125.0852 | 119.4692 | 136.8165 |
| 3292.63011 | 139.8132 | 130.1042 | 125.1183 | 119.476  | 136.8763 |
| 3293.59456 | 139.7529 | 129.9968 | 124.9715 | 119.3907 | 136.8173 |
| 3294.55901 | 139.7553 | 129.9349 | 124.9026 | 119.3464 | 136.8191 |
| 3295.52346 | 139.8456 | 129.9605 | 124.9804 | 119.3937 | 136.8828 |
| 3296.48791 | 140.0259 | 130.1041 | 125.1836 | 119.5052 | 136.9913 |
| 3297.45236 | 140.1824 | 130.2151 | 125.3228 | 119.5464 | 137.0336 |
| 3298.41681 | 140.22   | 130.2121 | 125.3137 | 119.5291 | 137.063  |
| 3299.38126 | 140.191  | 130.1365 | 125.2833 | 119.5445 | 137.038  |
| 3300.34571 | 140.0905 | 130.0117 | 125.2176 | 119.4842 | 136.916  |
| 3301.31016 | 139.8859 | 129.823  | 125.0757 | 119.3671 | 136.7309 |
| 3302.27461 | 139.5847 | 129.5654 | 124.8624 | 119.2316 | 136.4521 |
| 3303.23906 | 139.3093 | 129.2801 | 124.6041 | 119.0233 | 136.1102 |
| 3304.20351 | 139.2001 | 129.1222 | 124.4769 | 118.8814 | 135.9227 |
| 3305.16796 | 139.2356 | 129.1091 | 124.4932 | 118.8643 | 135.8848 |
| 3306.13241 | 139.3337 | 129.1569 | 124.6062 | 118.9209 | 135.9054 |
| 3307.09685 | 139.3058 | 129.1424 | 124.7185 | 118.9629 | 135.8042 |
| 3308.06131 | 139.3229 | 129.19   | 124.8164 | 118.9797 | 135.6968 |
| 3309.02575 | 139.6514 | 129.4326 | 124.9994 | 119.0591 | 135.8899 |
| 3309.9902  | 139.9362 | 129.6147 | 125.19   | 119.1979 | 136.1529 |
| 3310.95465 | 139.9976 | 129.6364 | 125.2503 | 119.2536 | 136.1904 |

|            |          |          |          |          |          |
|------------|----------|----------|----------|----------|----------|
| 3311.9191  | 139.9793 | 129.5916 | 125.2705 | 119.263  | 136.119  |
| 3312.88355 | 139.9747 | 129.5831 | 125.278  | 119.2452 | 136.0573 |
| 3313.848   | 140.0382 | 129.6095 | 125.2337 | 119.1825 | 136.1196 |
| 3314.81245 | 140.0726 | 129.564  | 125.2105 | 119.1683 | 136.1909 |
| 3315.7769  | 140.0557 | 129.493  | 125.2001 | 119.1647 | 136.1484 |
| 3316.74135 | 140.0373 | 129.4585 | 125.2144 | 119.1501 | 136.0877 |
| 3317.7058  | 140.0582 | 129.4742 | 125.2119 | 119.1566 | 136.1181 |
| 3318.67025 | 140.0448 | 129.4331 | 125.1708 | 119.1487 | 136.1062 |
| 3319.6347  | 139.9705 | 129.3524 | 125.1287 | 119.1033 | 136.028  |
| 3320.59915 | 139.9103 | 129.2785 | 125.1033 | 119.0568 | 135.9486 |
| 3321.5636  | 139.8197 | 129.1967 | 125.0557 | 119.0212 | 135.8665 |
| 3322.52805 | 139.6682 | 129.061  | 124.9906 | 118.9518 | 135.7188 |
| 3323.4925  | 139.4144 | 128.8049 | 124.7682 | 118.7911 | 135.4179 |
| 3324.45694 | 139.2584 | 128.6216 | 124.5536 | 118.6465 | 135.159  |
| 3325.42139 | 139.4361 | 128.7322 | 124.6884 | 118.6998 | 135.2307 |
| 3326.38584 | 139.7241 | 128.9756 | 125.0135 | 118.8951 | 135.4417 |
| 3327.35029 | 139.8266 | 129.0535 | 125.1119 | 118.9553 | 135.5229 |
| 3328.31474 | 139.7915 | 129.0164 | 125.0993 | 118.9504 | 135.5018 |
| 3329.27919 | 139.7653 | 128.9957 | 125.1004 | 118.9375 | 135.4542 |
| 3330.24364 | 139.8024 | 128.9978 | 125.0981 | 118.9117 | 135.4469 |
| 3331.20809 | 139.8362 | 128.9746 | 125.095  | 118.8782 | 135.4476 |
| 3332.17254 | 139.8334 | 128.9594 | 125.1013 | 118.8678 | 135.4532 |
| 3333.13699 | 139.7854 | 128.9256 | 125.103  | 118.8539 | 135.3919 |
| 3334.10144 | 139.672  | 128.8526 | 125.0347 | 118.7788 | 135.2339 |
| 3335.06589 | 139.4651 | 128.656  | 124.8084 | 118.5693 | 135.0082 |
| 3336.03034 | 139.2461 | 128.4291 | 124.6682 | 118.464  | 134.7761 |
| 3336.99479 | 139.1157 | 128.315  | 124.4502 | 118.3285 | 134.642  |
| 3337.95923 | 139.1621 | 128.2869 | 124.3282 | 118.2788 | 134.7405 |
| 3338.92368 | 139.3874 | 128.4324 | 124.5741 | 118.4608 | 134.9864 |
| 3339.88813 | 139.4983 | 128.5159 | 124.7594 | 118.5557 | 135.0621 |
| 3340.85258 | 139.3242 | 128.3532 | 124.6552 | 118.4884 | 134.9134 |
| 3341.81703 | 139.1874 | 128.1934 | 124.5023 | 118.3816 | 134.7651 |
| 3342.78148 | 139.3475 | 128.2937 | 124.5953 | 118.4093 | 134.8372 |
| 3343.74593 | 139.548  | 128.4684 | 124.7928 | 118.5496 | 134.9596 |
| 3344.71038 | 139.6255 | 128.5542 | 124.9161 | 118.6431 | 134.996  |
| 3345.67483 | 139.5983 | 128.5281 | 124.9519 | 118.6278 | 134.9201 |
| 3346.63928 | 139.5166 | 128.4254 | 124.8841 | 118.5735 | 134.7989 |
| 3347.60373 | 139.3055 | 128.2243 | 124.6994 | 118.4545 | 134.5799 |
| 3348.56818 | 138.9741 | 127.9191 | 124.3963 | 118.2193 | 134.2684 |
| 3349.53263 | 138.8306 | 127.7381 | 124.1976 | 118.0724 | 134.1075 |
| 3350.49708 | 139.0538 | 127.8883 | 124.3512 | 118.1523 | 134.2783 |
| 3351.46153 | 139.3496 | 128.1455 | 124.6425 | 118.3292 | 134.544  |
| 3352.42598 | 139.4994 | 128.2856 | 124.7923 | 118.4286 | 134.6557 |
| 3353.39043 | 139.5572 | 128.3284 | 124.8655 | 118.4515 | 134.6794 |
| 3354.35487 | 139.562  | 128.3324 | 124.9222 | 118.4462 | 134.6381 |
| 3355.31932 | 139.5477 | 128.3522 | 124.9518 | 118.4108 | 134.5344 |
| 3356.28377 | 139.5305 | 128.3337 | 124.8831 | 118.3182 | 134.4916 |
| 3357.24822 | 139.4377 | 128.2023 | 124.7298 | 118.2169 | 134.4548 |
| 3358.21267 | 139.2315 | 127.9781 | 124.5249 | 118.093  | 134.2945 |
| 3359.17712 | 139.0936 | 127.8361 | 124.3849 | 118.0058 | 134.1321 |
| 3360.14157 | 139.1906 | 127.9123 | 124.4718 | 118.0295 | 134.1611 |
| 3361.10602 | 139.3622 | 128.0688 | 124.6918 | 118.1573 | 134.2536 |
| 3362.07047 | 139.4651 | 128.1519 | 124.7491 | 118.1616 | 134.2756 |
| 3363.03492 | 139.3678 | 128.0341 | 124.669  | 118.1294 | 134.189  |

|            |          |          |          |          |          |
|------------|----------|----------|----------|----------|----------|
| 3363.99937 | 139.0589 | 127.7778 | 124.5091 | 118.0358 | 133.9073 |
| 3364.96382 | 138.7149 | 127.4659 | 124.2445 | 117.7958 | 133.5111 |
| 3365.92827 | 138.5478 | 127.2987 | 124.0713 | 117.6202 | 133.3025 |
| 3366.89272 | 138.4664 | 127.1942 | 124.0045 | 117.5827 | 133.2024 |
| 3367.85716 | 138.4344 | 127.1553 | 123.9458 | 117.5559 | 133.1705 |
| 3368.82161 | 138.5361 | 127.2114 | 123.9241 | 117.563  | 133.2607 |
| 3369.78606 | 138.8354 | 127.4322 | 124.1322 | 117.74   | 133.5535 |
| 3370.75051 | 139.145  | 127.7157 | 124.4258 | 117.9742 | 133.8807 |
| 3371.71496 | 139.3126 | 127.9164 | 124.6065 | 118.1063 | 134.0824 |
| 3372.67941 | 139.3961 | 128.0049 | 124.6905 | 118.1596 | 134.1894 |
| 3373.64386 | 139.3885 | 128.0115 | 124.6816 | 118.1608 | 134.2156 |
| 3374.60831 | 139.2722 | 127.9081 | 124.5445 | 118.0889 | 134.1309 |
| 3375.57276 | 139.2184 | 127.8614 | 124.4247 | 118.0338 | 134.0764 |
| 3376.53721 | 139.3843 | 128.032  | 124.5536 | 118.1406 | 134.2314 |
| 3377.50166 | 139.4979 | 128.2005 | 124.6965 | 118.2441 | 134.3691 |
| 3378.46611 | 139.4133 | 128.1467 | 124.6281 | 118.1912 | 134.3044 |
| 3379.43056 | 139.4551 | 128.1779 | 124.6185 | 118.2158 | 134.3442 |
| 3380.39501 | 139.731  | 128.4572 | 124.8734 | 118.4039 | 134.621  |
| 3381.35946 | 139.9328 | 128.6814 | 125.0896 | 118.549  | 134.8379 |
| 3382.32391 | 139.9731 | 128.7633 | 125.1917 | 118.6312 | 134.8727 |
| 3383.28836 | 139.9809 | 128.8178 | 125.2882 | 118.7115 | 134.8234 |
| 3384.2528  | 139.9509 | 128.8381 | 125.3188 | 118.7293 | 134.7458 |
| 3385.21725 | 139.916  | 128.8847 | 125.2778 | 118.7359 | 134.7712 |
| 3386.1817  | 139.9034 | 128.9041 | 125.1979 | 118.7761 | 134.8655 |
| 3387.14615 | 139.8743 | 128.8975 | 125.1597 | 118.8312 | 134.9513 |
| 3388.1106  | 139.7336 | 128.7625 | 125.0654 | 118.7867 | 134.8868 |
| 3389.07505 | 139.4439 | 128.4852 | 124.7713 | 118.5905 | 134.6285 |
| 3390.0395  | 139.2677 | 128.34   | 124.5689 | 118.4484 | 134.4566 |
| 3391.00395 | 139.327  | 128.4617 | 124.7245 | 118.5305 | 134.4845 |
| 3391.9684  | 139.5744 | 128.8394 | 125.136  | 118.8014 | 134.6488 |
| 3392.93285 | 139.9062 | 129.2931 | 125.2902 | 118.9022 | 135.0016 |
| 3393.8973  | 140.1146 | 129.4875 | 125.2526 | 118.9948 | 135.4477 |
| 3394.86175 | 140.3093 | 129.6856 | 125.4887 | 119.2989 | 135.8587 |
| 3395.8262  | 140.3435 | 129.8214 | 125.6975 | 119.4977 | 135.9099 |
| 3396.79065 | 140.1509 | 129.7363 | 125.5721 | 119.4236 | 135.6535 |
| 3397.7551  | 139.9022 | 129.5262 | 125.1514 | 119.1005 | 135.4595 |
| 3398.71954 | 139.7524 | 129.3284 | 124.944  | 119.0147 | 135.4308 |
| 3399.68399 | 139.7893 | 129.3373 | 124.9834 | 119.1193 | 135.4776 |
| 3400.64844 | 140.0069 | 129.5992 | 125.1916 | 119.3264 | 135.7068 |
| 3401.61289 | 140.4531 | 130.1317 | 125.6066 | 119.712  | 136.2266 |
| 3402.57734 | 140.9206 | 130.7004 | 126.0948 | 120.1377 | 136.7447 |
| 3403.54179 | 141.1596 | 131.0243 | 126.3406 | 120.3674 | 137.0213 |
| 3404.50624 | 141.2336 | 131.1459 | 126.4027 | 120.4527 | 137.1861 |
| 3405.47069 | 141.2518 | 131.2064 | 126.4722 | 120.551  | 137.2776 |
| 3406.43514 | 141.1162 | 131.1226 | 126.3641 | 120.5154 | 137.1785 |
| 3407.39959 | 140.9153 | 130.9209 | 126.125  | 120.3758 | 136.9646 |
| 3408.36404 | 141.0419 | 131.0633 | 126.2039 | 120.4692 | 137.1214 |
| 3409.32849 | 141.369  | 131.4611 | 126.5564 | 120.7565 | 137.521  |
| 3410.29294 | 141.3352 | 131.5269 | 126.5803 | 120.8252 | 137.5714 |
| 3411.25739 | 141.1307 | 131.3557 | 126.3459 | 120.6816 | 137.4072 |
| 3412.22184 | 141.2877 | 131.5114 | 126.4417 | 120.7601 | 137.5918 |
| 3413.18629 | 141.6813 | 131.9607 | 126.7881 | 121.0625 | 138.0216 |
| 3414.15073 | 142.0096 | 132.3705 | 127.0701 | 121.3394 | 138.4215 |
| 3415.11518 | 142.2438 | 132.6795 | 127.3062 | 121.5642 | 138.7443 |

|            |          |          |          |          |          |
|------------|----------|----------|----------|----------|----------|
| 3416.07963 | 142.3991 | 132.8873 | 127.4232 | 121.664  | 138.9615 |
| 3417.04408 | 142.5578 | 133.0367 | 127.5016 | 121.7352 | 139.1352 |
| 3418.00853 | 142.5547 | 133.0989 | 127.5317 | 121.7476 | 139.1234 |
| 3418.97298 | 142.3552 | 133.0183 | 127.5882 | 121.7376 | 138.8097 |
| 3419.93743 | 142.4412 | 133.2369 | 127.844  | 121.8125 | 138.6787 |
| 3420.90188 | 142.7928 | 133.6836 | 128.017  | 121.9119 | 138.9907 |
| 3421.86633 | 142.9247 | 133.8178 | 128.0214 | 122.069  | 139.3257 |
| 3422.83078 | 142.9352 | 133.7977 | 127.9673 | 122.1806 | 139.5084 |
| 3423.79523 | 142.9113 | 133.7092 | 127.8833 | 122.2301 | 139.5943 |
| 3424.75968 | 142.8406 | 133.6291 | 127.8509 | 122.2789 | 139.6081 |
| 3425.72413 | 142.6681 | 133.4697 | 127.7467 | 122.2133 | 139.4625 |
| 3426.68858 | 142.4392 | 133.2387 | 127.5316 | 122.0536 | 139.1954 |
| 3427.65303 | 142.3786 | 133.1524 | 127.4248 | 121.9764 | 139.0903 |
| 3428.61748 | 142.3273 | 133.0681 | 127.3133 | 121.9044 | 139.0134 |
| 3429.58192 | 142.3763 | 133.1298 | 127.3531 | 121.9674 | 139.048  |
| 3430.54637 | 142.7344 | 133.552  | 127.7366 | 122.2715 | 139.3913 |
| 3431.51082 | 142.8275 | 133.7016 | 127.8223 | 122.3465 | 139.5608 |
| 3432.47527 | 142.4835 | 133.3502 | 127.4532 | 122.0991 | 139.3093 |
| 3433.43972 | 142.1643 | 132.9811 | 127.0669 | 121.7724 | 138.985  |
| 3434.40417 | 142.2484 | 133.0312 | 127.1023 | 121.8065 | 139.0682 |
| 3435.36862 | 142.3744 | 133.1649 | 127.2477 | 121.9202 | 139.2136 |
| 3436.33307 | 142.5424 | 133.3353 | 127.374  | 122.0287 | 139.3691 |
| 3437.29752 | 143.0826 | 133.9258 | 127.8725 | 122.4711 | 139.9368 |
| 3438.26197 | 143.6686 | 134.6244 | 128.4376 | 122.9837 | 140.583  |
| 3439.22642 | 144.0128 | 135.0545 | 128.7122 | 123.2505 | 140.9635 |
| 3440.19087 | 144.1893 | 135.2574 | 128.9083 | 123.4145 | 141.115  |
| 3441.15532 | 144.1785 | 135.3284 | 129.1493 | 123.5627 | 141.015  |
| 3442.11977 | 144.22   | 135.4525 | 129.2808 | 123.614  | 140.8893 |
| 3443.08421 | 144.4634 | 135.6561 | 129.1807 | 123.5223 | 141.1133 |
| 3444.04866 | 144.5507 | 135.6444 | 129.1972 | 123.6197 | 141.3655 |
| 3445.01311 | 144.2855 | 135.4514 | 129.2551 | 123.614  | 141.0979 |
| 3445.97756 | 143.9186 | 135.3086 | 129.5532 | 123.6951 | 140.4582 |
| 3446.94201 | 144.1639 | 135.7868 | 129.8095 | 123.7648 | 140.32   |
| 3447.90646 | 144.5966 | 136.1372 | 129.4558 | 123.5842 | 140.9676 |
| 3448.87091 | 144.5902 | 135.9161 | 129.3119 | 123.8301 | 141.4666 |
| 3449.83536 | 144.5825 | 135.8455 | 129.3457 | 124.0377 | 141.6333 |
| 3450.79981 | 144.613  | 135.8737 | 129.3407 | 124.1093 | 141.7225 |
| 3451.76426 | 144.6612 | 135.9483 | 129.3718 | 124.1717 | 141.8323 |
| 3452.72871 | 144.7398 | 136.0168 | 129.4485 | 124.2437 | 141.9358 |
| 3453.69316 | 144.8168 | 136.1179 | 129.5074 | 124.2935 | 142.0385 |
| 3454.65761 | 144.8734 | 136.2385 | 129.6075 | 124.374  | 142.147  |
| 3455.62206 | 144.9816 | 136.392  | 129.6896 | 124.4277 | 142.2555 |
| 3456.58651 | 145.0016 | 136.4225 | 129.6298 | 124.3854 | 142.2792 |
| 3457.55096 | 144.6796 | 136.0793 | 129.3177 | 124.0824 | 141.9503 |
| 3458.51541 | 144.2212 | 135.5671 | 128.8564 | 123.611  | 141.4471 |
| 3459.47985 | 144.3217 | 135.6677 | 128.9449 | 123.6713 | 141.5148 |
| 3460.4443  | 144.8573 | 136.3628 | 129.6274 | 124.256  | 142.0483 |
| 3461.40875 | 145.163  | 136.8473 | 130.084  | 124.5953 | 142.3068 |
| 3462.3732  | 145.1681 | 136.8899 | 130.0507 | 124.5512 | 142.2617 |
| 3463.33765 | 145.059  | 136.69   | 129.7109 | 124.3156 | 142.2374 |
| 3464.3021  | 144.6864 | 136.1899 | 129.3216 | 124.086  | 142.0208 |
| 3465.26655 | 144.0599 | 135.507  | 128.803  | 123.6402 | 141.3471 |
| 3466.231   | 143.6871 | 135.1583 | 128.5791 | 123.3612 | 140.8474 |
| 3467.19545 | 143.6487 | 135.1521 | 128.4469 | 123.1936 | 140.7875 |

|            |          |          |          |          |          |
|------------|----------|----------|----------|----------|----------|
| 3468.1599  | 143.7411 | 135.2349 | 128.4235 | 123.2746 | 141.0366 |
| 3469.12435 | 144.2804 | 135.8454 | 129.0037 | 123.8875 | 141.712  |
| 3470.0888  | 145.0091 | 136.7208 | 129.7796 | 124.5949 | 142.5284 |
| 3471.05325 | 145.5423 | 137.3351 | 130.2142 | 125.0186 | 143.1333 |
| 3472.0177  | 145.7688 | 137.5639 | 130.3762 | 125.1962 | 143.4197 |
| 3472.98214 | 145.728  | 137.5589 | 130.391  | 125.2043 | 143.4221 |
| 3473.94659 | 145.6061 | 137.5094 | 130.4004 | 125.1665 | 143.2346 |
| 3474.91104 | 145.7338 | 137.7197 | 130.4464 | 125.1298 | 143.2811 |
| 3475.87549 | 145.8232 | 137.7923 | 130.3314 | 125.0677 | 143.4898 |
| 3476.83994 | 145.5022 | 137.3361 | 129.9668 | 124.8118 | 143.3136 |
| 3477.80439 | 144.9471 | 136.6374 | 129.3879 | 124.2576 | 142.7577 |
| 3478.76884 | 144.7837 | 136.4235 | 129.3016 | 124.0665 | 142.4548 |
| 3479.73329 | 145.3001 | 137.0834 | 130.072  | 124.607  | 142.7653 |
| 3480.69774 | 145.8167 | 137.9063 | 130.8311 | 125.1165 | 143.1134 |
| 3481.66219 | 146.0156 | 138.338  | 131.133  | 125.3138 | 143.2334 |
| 3482.62664 | 146.1391 | 138.4642 | 130.839  | 125.1306 | 143.4629 |
| 3483.59109 | 145.8754 | 137.996  | 130.3398 | 124.9221 | 143.5166 |
| 3484.55554 | 145.3869 | 137.3409 | 129.9436 | 124.7166 | 143.14   |
| 3485.51999 | 145.1415 | 137.0019 | 129.7064 | 124.4633 | 142.8349 |
| 3486.48444 | 145.2629 | 137.1442 | 130.0078 | 124.6154 | 142.8626 |
| 3487.44889 | 145.4067 | 137.4526 | 130.4148 | 124.8842 | 142.8922 |
| 3488.41334 | 145.5674 | 137.721  | 130.2904 | 124.7571 | 143.0543 |
| 3489.37778 | 145.5671 | 137.6327 | 130.0725 | 124.7078 | 143.3334 |
| 3490.34223 | 145.4385 | 137.4254 | 130.0223 | 124.7963 | 143.3378 |
| 3491.30668 | 145.4066 | 137.3795 | 129.932  | 124.6913 | 143.2882 |
| 3492.27113 | 145.3128 | 137.2257 | 129.7698 | 124.5339 | 143.2032 |
| 3493.23558 | 145.1938 | 137.0348 | 129.6483 | 124.386  | 143.0896 |
| 3494.20003 | 145.1954 | 137.0487 | 129.8181 | 124.4065 | 143.0111 |
| 3495.16448 | 145.0499 | 136.9749 | 129.8411 | 124.2933 | 142.7004 |
| 3496.12893 | 144.8376 | 136.7743 | 129.5519 | 124.0192 | 142.3866 |
| 3497.09338 | 145.0377 | 136.8507 | 129.3669 | 123.9081 | 142.6404 |
| 3498.05783 | 145.4116 | 137.0638 | 129.5876 | 124.1843 | 143.1984 |
| 3499.02228 | 145.6386 | 137.3009 | 129.9189 | 124.4494 | 143.4895 |
| 3499.98673 | 145.453  | 137.2253 | 129.9256 | 124.3001 | 143.2159 |
| 3500.95118 | 144.9582 | 136.8538 | 129.8094 | 124.0115 | 142.4857 |
| 3501.91563 | 144.8048 | 136.9352 | 130.117  | 123.9718 | 141.8171 |
| 3502.88008 | 145.1773 | 137.5457 | 130.5396 | 124.044  | 141.7904 |
| 3503.84453 | 145.5813 | 137.9047 | 130.3791 | 123.9769 | 142.3598 |
| 3504.80897 | 145.7238 | 137.7675 | 130.0699 | 124.1112 | 142.9763 |
| 3505.77342 | 145.8741 | 137.6341 | 129.9874 | 124.3334 | 143.4579 |
| 3506.73787 | 145.9549 | 137.5853 | 130.0981 | 124.5223 | 143.7371 |
| 3507.70232 | 145.7933 | 137.531  | 130.4796 | 124.6907 | 143.4471 |
| 3508.66677 | 145.5451 | 137.5724 | 130.8953 | 124.7405 | 142.7417 |
| 3509.63122 | 145.6381 | 137.8293 | 130.5287 | 124.1947 | 142.5672 |
| 3510.59567 | 145.5158 | 137.5442 | 129.9558 | 123.9191 | 142.8498 |
| 3511.56012 | 145.1161 | 137.0044 | 129.6121 | 123.9596 | 142.8176 |
| 3512.52457 | 144.9172 | 136.6862 | 129.3037 | 123.8412 | 142.777  |
| 3513.48902 | 145.145  | 136.7921 | 129.4201 | 123.9691 | 143.0861 |
| 3514.45347 | 145.43   | 137.0267 | 129.6245 | 124.1591 | 143.423  |
| 3515.41792 | 145.5367 | 137.1014 | 129.7074 | 124.2579 | 143.5446 |
| 3516.38237 | 145.577  | 137.135  | 129.8047 | 124.2812 | 143.5691 |
| 3517.34682 | 145.6489 | 137.2315 | 129.9733 | 124.3269 | 143.538  |
| 3518.31126 | 145.7079 | 137.3336 | 130.065  | 124.3344 | 143.4919 |
| 3519.27572 | 145.8449 | 137.4486 | 130.0155 | 124.2579 | 143.6585 |

|            |          |          |          |          |          |
|------------|----------|----------|----------|----------|----------|
| 3520.24016 | 145.8805 | 137.3775 | 129.9537 | 124.1966 | 143.84   |
| 3521.20461 | 145.4837 | 137.0806 | 130.1039 | 124.2111 | 143.3759 |
| 3522.16906 | 144.9434 | 136.913  | 130.312  | 124.1094 | 142.3668 |
| 3523.13351 | 145.1508 | 137.4207 | 130.3019 | 123.7638 | 142.0641 |
| 3524.09796 | 145.7785 | 137.9317 | 130.33   | 123.6929 | 142.7537 |
| 3525.06241 | 146.0834 | 138.056  | 130.6585 | 124.098  | 143.2729 |
| 3526.02686 | 146.05   | 138.0771 | 131.0177 | 124.4194 | 143.2122 |
| 3526.99131 | 146.033  | 138.252  | 131.2777 | 124.4627 | 142.9711 |
| 3527.95576 | 145.9956 | 138.2765 | 131.1559 | 124.2865 | 142.8873 |
| 3528.92021 | 145.9881 | 138.0961 | 130.8266 | 124.1959 | 143.0537 |
| 3529.88466 | 145.8615 | 137.7865 | 130.3943 | 124.0863 | 143.2623 |
| 3530.84911 | 145.678  | 137.5192 | 130.2185 | 124.1736 | 143.3961 |
| 3531.81356 | 145.6758 | 137.4497 | 129.9382 | 124.1211 | 143.6603 |
| 3532.77801 | 145.6981 | 137.3455 | 129.8272 | 124.2083 | 143.9531 |
| 3533.74246 | 145.5346 | 137.1936 | 129.7388 | 124.1534 | 143.9342 |
| 3534.7069  | 145.0815 | 136.8995 | 129.7408 | 124.1024 | 143.3814 |
| 3535.67135 | 144.9545 | 136.9202 | 129.9784 | 124.1015 | 142.8309 |
| 3536.6358  | 145.4869 | 137.392  | 129.9625 | 123.857  | 143.1976 |
| 3537.60025 | 145.7491 | 137.3756 | 129.7486 | 123.8245 | 143.8557 |
| 3538.5647  | 145.6294 | 137.1331 | 129.771  | 124.089  | 144.0225 |
| 3539.52915 | 145.5504 | 137.1024 | 129.7082 | 124.0796 | 144.02   |
| 3540.4936  | 145.4498 | 137.0344 | 129.5653 | 123.9807 | 143.9596 |
| 3541.45805 | 145.4473 | 137.0667 | 129.6071 | 123.9184 | 143.8776 |
| 3542.4225  | 145.5919 | 137.3312 | 130.1391 | 124.0914 | 143.7488 |
| 3543.38695 | 145.4423 | 137.4839 | 130.5152 | 124.0139 | 143.1992 |
| 3544.3514  | 145.1873 | 137.5374 | 130.8148 | 123.9508 | 142.4935 |
| 3545.31585 | 145.3588 | 137.8614 | 130.8843 | 123.6712 | 142.3534 |
| 3546.2803  | 145.4975 | 137.9506 | 131.0327 | 123.8228 | 142.5518 |
| 3547.24475 | 145.8524 | 138.1257 | 130.7231 | 123.8111 | 143.1245 |
| 3548.20919 | 146.2354 | 138.1447 | 130.2469 | 123.7842 | 144.1061 |
| 3549.17364 | 146.2245 | 137.8242 | 130.1999 | 124.1496 | 144.6273 |
| 3550.13809 | 146.0303 | 137.6092 | 130.3881 | 124.3649 | 144.5011 |
| 3551.10254 | 145.7435 | 137.6019 | 131.0533 | 124.6614 | 143.8053 |
| 3552.06699 | 145.7311 | 137.9913 | 131.1496 | 124.3724 | 143.3017 |
| 3553.03144 | 145.8068 | 138.0906 | 130.463  | 123.8088 | 143.6319 |
| 3553.99589 | 145.8359 | 137.8435 | 130.0526 | 123.8587 | 144.2464 |
| 3554.96034 | 145.9122 | 137.6781 | 129.9411 | 124.063  | 144.7253 |
| 3555.92479 | 145.8734 | 137.5643 | 130.1357 | 124.3633 | 144.8596 |
| 3556.88924 | 146.0225 | 137.7141 | 130.259  | 124.4158 | 145.0219 |
| 3557.85369 | 146.1906 | 137.8333 | 130.3154 | 124.3813 | 145.2228 |
| 3558.81814 | 145.852  | 137.6108 | 130.5157 | 124.4579 | 144.7974 |
| 3559.78259 | 145.6366 | 137.6862 | 130.5305 | 124.2772 | 144.2638 |
| 3560.74704 | 146.0859 | 138.1152 | 130.3122 | 123.8922 | 144.6246 |
| 3561.71149 | 146.5732 | 138.3731 | 130.8374 | 124.3045 | 145.1556 |
| 3562.67594 | 147.0656 | 138.8123 | 131.5206 | 124.6508 | 145.3489 |
| 3563.64039 | 147.8169 | 139.6036 | 132.1879 | 124.7896 | 145.7983 |
| 3564.60484 | 147.7657 | 139.8253 | 133.3737 | 125.2277 | 145.3309 |
| 3565.56928 | 147.1158 | 139.9731 | 135.0261 | 125.7047 | 143.4093 |
| 3566.53373 | 146.7125 | 140.6322 | 134.8162 | 124.4353 | 141.7405 |
| 3567.49818 | 145.8745 | 139.7966 | 133.2375 | 123.7117 | 141.6184 |
| 3568.46263 | 146.1284 | 139.3548 | 130.8895 | 122.9476 | 143.257  |
| 3569.42708 | 146.3712 | 138.6629 | 130.1261 | 123.3601 | 144.9806 |
| 3570.39153 | 146.302  | 138.1976 | 130.5926 | 124.3499 | 145.5318 |
| 3571.35598 | 146.3665 | 138.1164 | 130.4493 | 124.4032 | 145.9126 |

|            |          |          |          |          |          |
|------------|----------|----------|----------|----------|----------|
| 3572.32043 | 146.3231 | 137.9953 | 130.5241 | 124.5661 | 146.0508 |
| 3573.28488 | 146.2349 | 138.0638 | 130.7231 | 124.6613 | 145.8768 |
| 3574.24933 | 146.3475 | 138.3643 | 130.8638 | 124.6296 | 145.8742 |
| 3575.21378 | 146.4851 | 138.5275 | 130.7847 | 124.5257 | 146.0677 |
| 3576.17823 | 146.4624 | 138.4641 | 130.9339 | 124.746  | 146.1198 |
| 3577.14268 | 146.6207 | 138.5579 | 130.9431 | 124.7082 | 146.3048 |
| 3578.10713 | 146.5435 | 138.3601 | 130.8563 | 124.6247 | 146.4144 |
| 3579.07157 | 146.1523 | 138.0231 | 130.9367 | 124.7029 | 146.0149 |
| 3580.03602 | 146.0088 | 138.0221 | 130.5411 | 124.3114 | 145.8132 |
| 3581.00047 | 146.1248 | 138.0402 | 130.1396 | 124.1426 | 146.2075 |
| 3581.96492 | 146.2591 | 138.0555 | 130.4655 | 124.5151 | 146.4884 |
| 3582.92937 | 146.4251 | 138.2903 | 130.701  | 124.5773 | 146.5309 |
| 3583.89382 | 146.7346 | 138.5943 | 130.6386 | 124.3357 | 146.8094 |
| 3584.85827 | 146.7538 | 138.6735 | 131.5407 | 124.7514 | 146.631  |
| 3585.82272 | 146.4892 | 138.981  | 133.6027 | 125.6654 | 145.2983 |
| 3586.78717 | 146.6396 | 140.0783 | 134.1877 | 124.8979 | 143.9711 |
| 3587.75162 | 146.2101 | 139.8856 | 133.3137 | 124.0272 | 143.5547 |
| 3588.71607 | 146.4146 | 139.559  | 131.6272 | 123.6433 | 144.8645 |
| 3589.68052 | 146.6945 | 139.024  | 129.9959 | 123.2792 | 146.7314 |
| 3590.64497 | 146.4628 | 138.3301 | 130.173  | 124.1407 | 147.3239 |
| 3591.60942 | 146.2731 | 138.1464 | 130.7562 | 124.6844 | 147.1296 |
| 3592.57387 | 146.3861 | 138.5048 | 131.6759 | 125.0619 | 146.7007 |
| 3593.53831 | 146.7584 | 139.1365 | 131.6854 | 124.5472 | 146.6037 |
| 3594.50277 | 146.4294 | 138.952  | 132.0502 | 124.7761 | 146.132  |
| 3595.46721 | 146.6039 | 139.267  | 131.6569 | 124.3745 | 146.1219 |
| 3596.43166 | 146.7955 | 139.2274 | 130.8273 | 123.7622 | 146.8126 |
| 3597.39611 | 146.2336 | 138.4368 | 130.9006 | 124.2415 | 146.6666 |
| 3598.36056 | 146.1911 | 138.3441 | 131.0252 | 124.2729 | 146.4445 |
| 3599.32501 | 146.3021 | 138.435  | 131.2371 | 124.2146 | 146.4041 |
| 3600.28946 | 146.0915 | 138.3981 | 131.5223 | 124.4533 | 146.0574 |
| 3601.25391 | 146.1083 | 138.5105 | 130.733  | 123.8751 | 146.2267 |
| 3602.21836 | 146.1685 | 138.2949 | 130.3032 | 123.9072 | 146.8495 |
| 3603.18281 | 146.3871 | 138.2409 | 130.1503 | 124.1065 | 147.4173 |
| 3604.14726 | 146.8066 | 138.3419 | 130.2465 | 124.2922 | 148.0744 |
| 3605.11171 | 146.9719 | 138.5067 | 131.0568 | 124.7363 | 148.0967 |
| 3606.07616 | 146.8179 | 138.7937 | 132.5942 | 125.4111 | 147.1561 |
| 3607.04061 | 147.2355 | 139.8798 | 133.1627 | 125.0049 | 146.6152 |
| 3608.00506 | 146.9217 | 139.8842 | 133.2965 | 124.7371 | 146.1024 |
| 3608.96951 | 147.0689 | 140.0524 | 133.307  | 124.9893 | 146.2645 |
| 3609.93395 | 148.6598 | 141.2443 | 131.9737 | 123.9781 | 148.5074 |
| 3610.8984  | 148.2545 | 140.5424 | 133.0032 | 125.1319 | 148.5329 |
| 3611.86285 | 147.4803 | 140.3459 | 134.7238 | 126.264  | 146.7938 |
| 3612.8273  | 147.8564 | 141.5402 | 134.2007 | 124.9902 | 146.2933 |
| 3613.79175 | 147.7733 | 141.325  | 133.4376 | 124.4597 | 146.5617 |
| 3614.7562  | 148.2451 | 141.3119 | 133.0806 | 124.5451 | 147.413  |
| 3615.72065 | 148.7093 | 141.249  | 132.4893 | 124.3307 | 148.5431 |
| 3616.6851  | 147.9892 | 140.399  | 133.72   | 125.5935 | 147.9203 |
| 3617.64955 | 147.8162 | 140.8391 | 134.7138 | 125.6832 | 146.7414 |
| 3618.614   | 147.0886 | 140.6645 | 134.6524 | 124.9754 | 145.5608 |
| 3619.57845 | 146.3783 | 140.0549 | 133.3074 | 124.2341 | 145.1106 |
| 3620.5429  | 146.6565 | 139.76   | 131.1924 | 123.1734 | 146.3946 |
| 3621.50735 | 146.7574 | 139.1277 | 130.647  | 123.607  | 147.6056 |
| 3622.4718  | 146.5564 | 138.5117 | 130.3928 | 124.0565 | 148.1763 |
| 3623.43625 | 146.6414 | 138.4117 | 130.3974 | 124.3563 | 148.5762 |

|            |          |          |          |          |          |
|------------|----------|----------|----------|----------|----------|
| 3624.40069 | 147.0951 | 138.7139 | 130.7779 | 124.59   | 148.9384 |
| 3625.36514 | 147.7608 | 139.2793 | 131.8695 | 125.1303 | 149.2151 |
| 3626.32959 | 148.6107 | 140.2183 | 133.1464 | 125.378  | 149.4636 |
| 3627.29404 | 148.1098 | 140.2415 | 135.8773 | 126.7158 | 147.8705 |
| 3628.25849 | 146.6009 | 140.338  | 138.4663 | 127.411  | 143.9314 |
| 3629.22294 | 146.8342 | 141.6838 | 135.3536 | 123.9966 | 143.1935 |
| 3630.18739 | 148.0771 | 141.495  | 131.1951 | 122.2357 | 147.3327 |
| 3631.15184 | 147.9626 | 140.2181 | 130.9432 | 123.507  | 149.0743 |
| 3632.11629 | 147.1017 | 139.1126 | 131.5988 | 124.7679 | 148.667  |
| 3633.08074 | 146.3171 | 138.7219 | 132.1237 | 125.2401 | 147.4982 |
| 3634.04519 | 146.6905 | 139.3611 | 131.165  | 124.2693 | 147.7471 |
| 3635.00964 | 147.1717 | 139.3595 | 130.4284 | 124.0191 | 149.0026 |
| 3635.97409 | 147.0334 | 138.8849 | 130.8094 | 124.7656 | 149.2878 |
| 3636.93854 | 146.8529 | 138.812  | 131.3228 | 125.1963 | 148.93   |
| 3637.90299 | 147.1407 | 139.2306 | 131.5462 | 125.1575 | 148.8946 |
| 3638.86744 | 147.5589 | 139.501  | 131.3335 | 124.9488 | 149.4235 |
| 3639.83189 | 147.5652 | 139.304  | 131.4127 | 125.1665 | 149.6855 |
| 3640.79633 | 147.3189 | 139.1897 | 131.7334 | 125.3295 | 149.2855 |
| 3641.76078 | 147.2494 | 139.448  | 131.9256 | 125.2542 | 148.875  |
| 3642.72523 | 147.9365 | 140.168  | 131.775  | 124.9179 | 149.4641 |
| 3643.68968 | 148.8157 | 140.6097 | 131.9494 | 125.1062 | 150.591  |
| 3644.65413 | 149.4013 | 140.9192 | 133.1632 | 125.9915 | 150.9826 |
| 3645.61858 | 149.4048 | 141.3563 | 135.667  | 127.1616 | 149.8452 |
| 3646.58303 | 149.7756 | 143.0704 | 138.7217 | 127.8411 | 148.0397 |
| 3647.54748 | 150.7104 | 145.5685 | 139.0296 | 126.0311 | 147.526  |
| 3648.51193 | 149.1935 | 144.5532 | 138.7545 | 125.6916 | 146.1316 |
| 3649.47638 | 147.609  | 143.5241 | 138.3226 | 125.5595 | 143.9442 |
| 3650.44083 | 147.5483 | 143.2868 | 136.5397 | 124.5902 | 144.3325 |
| 3651.40528 | 148.8037 | 143.1115 | 133.1985 | 123.569  | 147.8887 |
| 3652.36973 | 149.1704 | 141.7782 | 131.6201 | 123.9208 | 150.4224 |
| 3653.33418 | 149.1427 | 140.8515 | 132.1871 | 125.2598 | 151.1924 |
| 3654.29862 | 148.6309 | 140.3047 | 133.0732 | 126.1117 | 150.6094 |
| 3655.26307 | 147.2261 | 139.729  | 134.5849 | 126.976  | 148.2558 |
| 3656.22752 | 147.1528 | 140.6436 | 133.5421 | 125.5681 | 147.4417 |
| 3657.19197 | 147.9497 | 141.0068 | 130.8432 | 123.7367 | 149.417  |
| 3658.15642 | 147.5304 | 139.8775 | 130.863  | 124.6413 | 149.9902 |
| 3659.12087 | 147.1265 | 139.2654 | 131.0862 | 125.2764 | 149.7758 |
| 3660.08532 | 147.3263 | 139.2906 | 131.1409 | 125.3161 | 150.0004 |
| 3661.04977 | 147.687  | 139.4027 | 131.2372 | 125.3654 | 150.423  |
| 3662.01422 | 147.8973 | 139.4775 | 131.3609 | 125.5574 | 150.6511 |
| 3662.97867 | 147.9839 | 139.6267 | 131.3722 | 125.6245 | 150.7489 |
| 3663.94312 | 148.0197 | 139.7845 | 131.4442 | 125.6432 | 150.8703 |
| 3664.90757 | 148.3612 | 140.0975 | 131.6169 | 125.6939 | 151.2221 |
| 3665.87202 | 149.0654 | 140.6031 | 132.0877 | 125.8888 | 151.8632 |
| 3666.83647 | 149.5196 | 141.0404 | 133.2748 | 126.4651 | 151.9604 |
| 3667.80092 | 149.4627 | 141.4973 | 135.7025 | 127.6585 | 150.8453 |
| 3668.76537 | 149.6267 | 142.8983 | 137.5986 | 127.7347 | 149.259  |
| 3669.72982 | 148.9324 | 143.2456 | 138.248  | 127.0665 | 147.3313 |
| 3670.69426 | 150.024  | 143.9514 | 136.0533 | 125.6395 | 148.7034 |
| 3671.65871 | 151.9671 | 144.266  | 132.9716 | 124.2291 | 152.6848 |
| 3672.62316 | 151.5067 | 142.975  | 134.1396 | 126.0908 | 153.2423 |
| 3673.58761 | 150.2789 | 142.2416 | 137.3583 | 128.4106 | 150.9168 |
| 3674.55206 | 149.0541 | 143.1124 | 141.5578 | 129.7151 | 146.2663 |
| 3675.51651 | 149.6461 | 145.7074 | 139.5713 | 126.0275 | 144.6527 |



|            |          |          |          |          |          |
|------------|----------|----------|----------|----------|----------|
| 3676.48096 | 150.7795 | 145.0412 | 133.8535 | 123.2849 | 149.473  |
| 3677.44541 | 149.9264 | 142.748  | 133.1149 | 124.3924 | 150.8596 |
| 3678.40986 | 148.5265 | 141.0811 | 133.8578 | 126.0154 | 150.0412 |
| 3679.37431 | 148.167  | 140.8382 | 133.2855 | 125.9077 | 149.8605 |
| 3680.33876 | 148.5227 | 140.7428 | 131.8315 | 125.0775 | 150.9789 |
| 3681.30321 | 148.4058 | 140.0884 | 131.4487 | 125.4433 | 151.6598 |
| 3682.26766 | 148.2958 | 139.8763 | 131.5771 | 125.9105 | 151.7143 |
| 3683.23211 | 148.3696 | 140.0174 | 131.7277 | 126.0609 | 151.637  |
| 3684.19656 | 148.8372 | 140.4949 | 131.9836 | 126.0639 | 151.8851 |
| 3685.161   | 149.4392 | 140.9056 | 132.1023 | 125.9192 | 152.5202 |
| 3686.12545 | 149.2691 | 140.694  | 132.9502 | 126.4271 | 152.1834 |
| 3687.0899  | 148.0549 | 140.207  | 135.0862 | 127.4967 | 149.8267 |
| 3688.05435 | 148.4745 | 141.8951 | 136.8292 | 127.4656 | 148.2954 |
| 3689.0188  | 150.3832 | 144.2351 | 135.0795 | 124.8623 | 149.9359 |
| 3689.98325 | 148.9858 | 142.5389 | 135.6813 | 125.8896 | 149.1185 |
| 3690.9477  | 148.3997 | 141.9279 | 135.0736 | 126.0473 | 148.6976 |
| 3691.91215 | 148.9019 | 141.6991 | 131.9017 | 124.4414 | 150.9092 |
| 3692.8766  | 148.3648 | 140.3763 | 131.2946 | 125.1665 | 151.773  |
| 3693.84105 | 147.9484 | 139.671  | 131.3046 | 125.7555 | 151.7471 |
| 3694.8055  | 147.819  | 139.3347 | 131.1073 | 125.7658 | 151.7665 |
| 3695.76995 | 147.8966 | 139.2963 | 131.2654 | 125.9459 | 151.8216 |
| 3696.7344  | 148.1124 | 139.4547 | 131.0817 | 125.8171 | 152.0574 |
| 3697.69885 | 148.3563 | 139.5207 | 130.9444 | 125.753  | 152.4907 |
| 3698.6633  | 148.6726 | 139.6581 | 131.2088 | 126.0006 | 152.9174 |
| 3699.62774 | 148.6828 | 139.8182 | 131.8943 | 126.3384 | 152.7019 |
| 3700.59219 | 147.8448 | 139.6141 | 133.3444 | 127.108  | 151.1295 |
| 3701.55664 | 147.9203 | 140.4942 | 133.6381 | 126.7624 | 150.3137 |
| 3702.52109 | 148.8041 | 141.1279 | 131.5718 | 125.0765 | 151.8382 |
| 3703.48554 | 148.5364 | 140.1233 | 131.0836 | 125.4461 | 152.6143 |
| 3704.44999 | 148.227  | 139.6629 | 131.3892 | 126.1458 | 152.5464 |
| 3705.41444 | 148.5396 | 140.052  | 131.5879 | 126.2311 | 152.6851 |
| 3706.37889 | 149.2735 | 140.6022 | 131.8264 | 126.2279 | 153.2709 |
| 3707.34334 | 149.4877 | 140.7296 | 132.7504 | 126.7041 | 153.2021 |
| 3708.30779 | 149.2779 | 140.9447 | 134.7821 | 127.6861 | 151.9678 |
| 3709.27224 | 150.3753 | 142.8016 | 135.93   | 127.3545 | 151.6096 |
| 3710.23669 | 150.6232 | 143.5239 | 136.0511 | 126.4217 | 151.1855 |
| 3711.20114 | 148.6322 | 142.2106 | 137.8309 | 127.611  | 148.5316 |
| 3712.16559 | 148.8548 | 143.1022 | 136.0092 | 126.102  | 148.7675 |
| 3713.13004 | 149.7406 | 143.0328 | 132.6509 | 124.4263 | 151.6334 |
| 3714.09449 | 149.3077 | 141.7746 | 132.9008 | 125.9176 | 152.1924 |
| 3715.05894 | 149.3597 | 141.6016 | 132.804  | 126.4615 | 152.6514 |
| 3716.02338 | 149.6158 | 141.55   | 132.5293 | 126.545  | 153.3902 |
| 3716.98783 | 149.4723 | 141.1861 | 132.8597 | 126.9389 | 153.3329 |
| 3717.95228 | 149.0682 | 140.8912 | 133.4803 | 127.3084 | 152.4715 |
| 3718.91673 | 149.5204 | 141.4757 | 133.234  | 126.7282 | 152.466  |
| 3719.88118 | 149.8839 | 141.6321 | 132.5004 | 125.9523 | 153.1784 |
| 3720.84563 | 148.7361 | 140.5898 | 133.4846 | 126.822  | 152.0078 |
| 3721.81008 | 148.2382 | 140.8122 | 134.2581 | 126.9125 | 150.5784 |
| 3722.77453 | 149.2897 | 142.1295 | 132.8742 | 125.1414 | 151.578  |
| 3723.73898 | 149.2009 | 141.5011 | 132.7416 | 125.4586 | 152.2468 |
| 3724.70343 | 148.4071 | 140.8024 | 133.5229 | 126.399  | 151.3856 |
| 3725.66788 | 147.7891 | 140.6543 | 133.5343 | 126.1811 | 150.4491 |
| 3726.63233 | 148.1091 | 140.9037 | 132.4844 | 125.5227 | 150.9095 |
| 3727.59678 | 148.9435 | 140.9583 | 131.1712 | 124.915  | 152.5287 |

|            |          |          |          |          |          |
|------------|----------|----------|----------|----------|----------|
| 3728.56123 | 149.2688 | 140.5909 | 131.4399 | 125.6698 | 153.5391 |
| 3729.52567 | 149.4668 | 140.5744 | 132.3376 | 126.4997 | 153.7376 |
| 3730.49012 | 149.1973 | 140.6953 | 134.0798 | 127.3626 | 152.5427 |
| 3731.45457 | 149.5362 | 141.9417 | 136.1227 | 128.0189 | 151.237  |
| 3732.41902 | 152.0243 | 145.0687 | 136.0676 | 126.6103 | 152.7818 |
| 3733.38347 | 151.2154 | 144.1396 | 136.7096 | 126.6612 | 152.2004 |
| 3734.34792 | 149.2112 | 142.9226 | 139.0984 | 128.1781 | 148.708  |
| 3735.31237 | 149.1401 | 144.2518 | 137.8757 | 125.7122 | 147.2128 |
| 3736.27682 | 148.9197 | 143.6555 | 135.109  | 124.4569 | 148.5565 |
| 3737.24127 | 148.9217 | 142.8429 | 133.3717 | 124.4385 | 149.8611 |
| 3738.20572 | 149.6592 | 142.6726 | 133.3166 | 125.2036 | 151.4493 |
| 3739.17017 | 150.2766 | 142.7638 | 133.5699 | 125.8169 | 152.5517 |
| 3740.13462 | 150.3636 | 142.7666 | 134.8149 | 127.043  | 152.5401 |
| 3741.09907 | 152.0343 | 144.3619 | 135.5366 | 127.2531 | 153.6878 |
| 3742.06352 | 153.0413 | 144.9075 | 136.0597 | 127.4246 | 154.849  |
| 3743.02797 | 150.8431 | 143.2148 | 139.2385 | 129.8104 | 151.9147 |
| 3743.99242 | 148.9083 | 143.5663 | 142.1684 | 130.8119 | 147.2872 |
| 3744.95687 | 152.1783 | 147.8676 | 136.2961 | 124.7082 | 150.2844 |
| 3745.92131 | 153.7159 | 147.3243 | 134.8773 | 124.5566 | 154.0567 |
| 3746.88576 | 153.2853 | 146.0766 | 137.0694 | 127.1269 | 153.9339 |
| 3747.85021 | 152.5351 | 145.5928 | 139.5907 | 128.9652 | 152.4966 |
| 3748.81466 | 152.7186 | 146.6541 | 142.3185 | 130.1923 | 151.1052 |
| 3749.77911 | 155.0722 | 149.668  | 141.1493 | 127.8911 | 152.4021 |
| 3750.74356 | 153.0741 | 147.7818 | 141.2422 | 127.8451 | 150.7092 |
| 3751.70801 | 150.9334 | 146.2084 | 141.6127 | 128.8508 | 148.2504 |
| 3752.67246 | 152.0355 | 146.7709 | 136.1588 | 125.5839 | 150.9913 |
| 3753.63691 | 152.2343 | 145.3553 | 134.1686 | 125.4905 | 153.5574 |
| 3754.60136 | 151.2789 | 143.6587 | 134.5924 | 126.7836 | 153.5054 |
| 3755.56581 | 150.5477 | 142.9015 | 135.4959 | 127.7991 | 152.7376 |
| 3756.53026 | 151.1643 | 143.8511 | 135.4924 | 127.4672 | 152.9919 |
| 3757.49471 | 151.2849 | 144.1104 | 135.0763 | 126.9798 | 153.3244 |
| 3758.45916 | 149.9458 | 143.0896 | 136.4292 | 128.075  | 151.5615 |
| 3759.42361 | 149.9549 | 143.6628 | 136.5155 | 127.7477 | 150.7488 |
| 3760.38805 | 150.9866 | 144.1696 | 133.9103 | 126.0471 | 152.9315 |
| 3761.3525  | 150.8588 | 143.1252 | 133.4    | 126.7642 | 154.1641 |
| 3762.31695 | 150.8697 | 142.8319 | 133.8141 | 127.5515 | 154.4171 |
| 3763.2814  | 150.9684 | 142.9208 | 134.2138 | 127.7589 | 154.3385 |
| 3764.24585 | 150.3877 | 142.5916 | 135.132  | 128.2106 | 153.1513 |
| 3765.2103  | 150.1494 | 142.9278 | 135.8273 | 128.3163 | 152.0978 |
| 3766.17475 | 151.2869 | 144.1983 | 134.3966 | 126.7885 | 153.4178 |
| 3767.1392  | 151.6159 | 143.8669 | 133.9232 | 126.8658 | 154.6633 |
| 3768.10365 | 150.556  | 142.7329 | 135.1567 | 128.1419 | 153.5234 |
| 3769.0681  | 149.4182 | 142.2937 | 136.6693 | 128.8698 | 151.359  |
| 3770.03255 | 150.0268 | 143.385  | 135.3625 | 127.2886 | 151.4641 |
| 3770.997   | 150.6528 | 143.2329 | 133.2627 | 126.1163 | 153.2231 |
| 3771.96145 | 150.2991 | 142.209  | 133.0752 | 126.8793 | 153.6895 |
| 3772.9259  | 149.9767 | 141.7609 | 132.9835 | 127.2629 | 153.8008 |
| 3773.89035 | 149.9256 | 141.6916 | 132.9446 | 127.3443 | 153.9114 |
| 3774.8548  | 150.1206 | 141.7704 | 132.9769 | 127.3759 | 154.1446 |
| 3775.81924 | 150.4341 | 141.937  | 133.2305 | 127.562  | 154.4815 |
| 3776.78369 | 150.5967 | 142.1503 | 133.731  | 127.8299 | 154.4928 |
| 3777.74814 | 150.0745 | 142.162  | 134.6275 | 128.2336 | 153.3699 |
| 3778.71259 | 149.3974 | 142.4057 | 135.7022 | 128.5676 | 151.8381 |
| 3779.67704 | 150.1528 | 143.642  | 134.6839 | 127.2729 | 152.3767 |

|            |          |          |          |          |          |
|------------|----------|----------|----------|----------|----------|
| 3780.64149 | 150.7535 | 143.5173 | 133.2013 | 126.4529 | 153.9574 |
| 3781.60594 | 150.6437 | 142.7097 | 133.4876 | 127.3869 | 154.4405 |
| 3782.57039 | 150.5708 | 142.5366 | 133.8763 | 127.8055 | 154.2941 |
| 3783.53484 | 150.1978 | 142.4225 | 134.6012 | 128.1699 | 153.3526 |
| 3784.49929 | 150.2009 | 142.7146 | 134.7478 | 127.8854 | 152.6174 |
| 3785.46374 | 150.4434 | 142.7856 | 133.8403 | 127.0771 | 153.0687 |
| 3786.42819 | 150.2229 | 142.1878 | 133.2424 | 127.1009 | 153.6547 |
| 3787.39264 | 149.9785 | 141.82   | 133.0735 | 127.3537 | 153.8139 |
| 3788.35709 | 149.7615 | 141.6735 | 132.9595 | 127.4132 | 153.7298 |
| 3789.32154 | 149.7412 | 141.7066 | 132.9061 | 127.4438 | 153.7093 |
| 3790.28599 | 149.9379 | 141.8078 | 132.9781 | 127.4947 | 153.9614 |
| 3791.25043 | 150.128  | 141.8684 | 133.1557 | 127.6086 | 154.2318 |
| 3792.21488 | 150.3614 | 142.0351 | 133.2748 | 127.6261 | 154.455  |
| 3793.17933 | 150.8371 | 142.3992 | 133.5232 | 127.6797 | 154.8309 |
| 3794.14378 | 151.1248 | 142.7244 | 134.2532 | 128.0292 | 154.828  |
| 3795.10823 | 150.6203 | 142.6462 | 135.8016 | 128.81   | 153.5503 |
| 3796.07268 | 150.7488 | 143.546  | 136.8463 | 128.8985 | 152.5831 |
| 3797.03713 | 152.2575 | 145.2783 | 135.7501 | 127.4697 | 153.9322 |
| 3798.00158 | 153.0544 | 145.4241 | 135.3561 | 127.4179 | 155.5353 |
| 3798.96603 | 152.9558 | 144.9871 | 136.5182 | 128.535  | 155.4961 |
| 3799.93048 | 151.7433 | 144.3762 | 139.2718 | 130.1456 | 153.0245 |
| 3800.89493 | 150.8654 | 145.153  | 141.3548 | 130.3146 | 149.8351 |
| 3801.85938 | 151.8744 | 146.671  | 137.896  | 126.8167 | 150.7425 |
| 3802.82383 | 152.8346 | 146.1647 | 135.2508 | 125.9361 | 153.6525 |
| 3803.78828 | 152.9424 | 145.0439 | 134.7937 | 126.9001 | 155.2042 |
| 3804.75272 | 152.217  | 143.8345 | 135.5607 | 128.1992 | 154.9227 |
| 3805.71718 | 150.5357 | 142.7282 | 137.506  | 129.5299 | 152.322  |
| 3806.68162 | 149.9315 | 143.264  | 137.4864 | 128.8132 | 150.4639 |
| 3807.64607 | 151.0434 | 144.3056 | 133.8481 | 125.9328 | 152.64   |
| 3808.61052 | 150.9297 | 143.2621 | 133.2082 | 126.4967 | 154.1265 |
| 3809.57497 | 150.5005 | 142.3948 | 133.5559 | 127.5222 | 154.2416 |
| 3810.53942 | 150.4819 | 142.1579 | 133.5445 | 127.6863 | 154.3772 |
| 3811.50387 | 150.8878 | 142.3465 | 133.7521 | 127.8584 | 154.797  |
| 3812.46832 | 151.6438 | 142.8835 | 134.2286 | 128.0967 | 155.5006 |
| 3813.43277 | 152.2062 | 143.5023 | 135.2255 | 128.5833 | 155.7827 |
| 3814.39722 | 151.4111 | 143.5171 | 137.2812 | 129.6042 | 153.966  |
| 3815.36167 | 150.477  | 144.0776 | 139.451  | 130.2469 | 151.1296 |
| 3816.32612 | 152.5817 | 146.7128 | 137.0949 | 127.2647 | 152.6492 |
| 3817.29057 | 153.9121 | 146.5571 | 135.1416 | 126.2538 | 155.7163 |
| 3818.25502 | 153.4716 | 145.2869 | 136.5622 | 128.2063 | 155.6294 |
| 3819.21947 | 152.7087 | 144.8428 | 138.9669 | 129.8261 | 153.8216 |
| 3820.18392 | 151.5122 | 145.1664 | 142.0465 | 130.8204 | 150.3887 |
| 3821.14836 | 151.796  | 146.7534 | 140.5074 | 128.2438 | 149.3777 |
| 3822.11281 | 152.9889 | 146.6062 | 135.5553 | 125.6038 | 152.9907 |
| 3823.07726 | 152.5354 | 144.7535 | 134.6185 | 126.5501 | 154.5542 |
| 3824.04171 | 151.9661 | 143.7656 | 135.0129 | 127.7063 | 154.6869 |
| 3825.00616 | 151.2817 | 143.24   | 135.505  | 128.2528 | 154.034  |
| 3825.97061 | 150.5995 | 143.0468 | 136.1785 | 128.587  | 152.8583 |
| 3826.93506 | 151.1693 | 143.829  | 135.4934 | 127.7642 | 153.1858 |
| 3827.89951 | 151.9651 | 144.1127 | 134.5961 | 127.3307 | 154.7292 |
| 3828.86396 | 152.0407 | 143.7036 | 134.6677 | 127.9393 | 155.4835 |
| 3829.82841 | 151.4115 | 143.1923 | 135.463  | 128.6687 | 154.7326 |
| 3830.79286 | 150.8612 | 143.3021 | 136.8966 | 129.3462 | 153.2727 |
| 3831.75731 | 152.1646 | 144.973  | 136.3288 | 128.195  | 154.0846 |

|            |          |          |          |          |          |
|------------|----------|----------|----------|----------|----------|
| 3832.72176 | 152.8399 | 145.1698 | 135.3384 | 127.4478 | 155.6095 |
| 3833.68621 | 151.7143 | 143.9322 | 136.8568 | 129.0262 | 154.3995 |
| 3834.65065 | 152.2647 | 144.8685 | 137.6205 | 129.1783 | 153.8886 |
| 3835.6151  | 154.0265 | 146.4907 | 137.1312 | 128.0037 | 155.177  |
| 3836.57955 | 153.0257 | 145.4328 | 139.4392 | 129.6685 | 153.7277 |
| 3837.544   | 152.8093 | 146.1357 | 140.9128 | 130.1107 | 152.0983 |
| 3838.50845 | 153.6748 | 147.4595 | 138.0942 | 126.9689 | 152.8148 |
| 3839.4729  | 152.2739 | 145.8456 | 138.1062 | 127.5067 | 151.9322 |
| 3840.43735 | 152.1736 | 145.6442 | 137.646  | 127.6111 | 152.0885 |
| 3841.4018  | 152.7395 | 145.6332 | 135.731  | 126.856  | 154.0467 |
| 3842.36625 | 151.2341 | 143.7502 | 135.9518 | 128.0018 | 153.5009 |
| 3843.3307  | 150.2601 | 143.1161 | 136.3229 | 128.6154 | 152.3208 |
| 3844.29515 | 150.8413 | 143.8077 | 134.409  | 127.0496 | 153.3711 |
| 3845.2596  | 151.1048 | 143.4232 | 133.8263 | 127.2717 | 154.6628 |
| 3846.22405 | 151.3489 | 143.2051 | 134.2189 | 128.1044 | 155.3079 |
| 3847.1885  | 151.7666 | 143.457  | 134.6766 | 128.4846 | 155.6945 |
| 3848.15295 | 152.1367 | 143.8361 | 135.4119 | 128.8077 | 155.6583 |
| 3849.1174  | 153.1983 | 144.9251 | 136.6003 | 129.2134 | 155.9232 |
| 3850.08185 | 154.2764 | 146.0927 | 138.1343 | 129.582  | 156.1773 |
| 3851.04629 | 154.2272 | 146.4797 | 141.3828 | 131.2732 | 154.9867 |
| 3852.01074 | 154.714  | 148.4976 | 144.6378 | 131.9846 | 152.8116 |
| 3852.97519 | 153.2172 | 148.8406 | 145.9593 | 130.8463 | 148.9507 |
| 3853.93964 | 152.3231 | 147.8758 | 141.834  | 128.6506 | 149.3245 |
| 3854.90409 | 153.7371 | 147.5906 | 135.0184 | 125.0945 | 154.1743 |
| 3855.86854 | 152.3393 | 145.2362 | 135.6434 | 126.8619 | 154.0325 |
| 3856.83299 | 151.3722 | 144.2687 | 136.0083 | 127.9593 | 153.2135 |
| 3857.79744 | 151.7728 | 144.4043 | 134.5655 | 127.1862 | 154.349  |
| 3858.76189 | 152.1325 | 143.8815 | 134.3504 | 127.6648 | 155.6627 |
| 3859.72634 | 152.0558 | 143.4459 | 135.2296 | 128.6387 | 155.6254 |
| 3860.69079 | 151.8292 | 143.5647 | 136.6868 | 129.4989 | 154.6922 |
| 3861.65524 | 152.7547 | 145.1134 | 137.3981 | 129.3227 | 154.7497 |
| 3862.61969 | 153.3762 | 145.9589 | 137.1067 | 128.4424 | 155.3124 |
| 3863.58414 | 151.7799 | 144.7117 | 138.5397 | 129.541  | 153.4047 |
| 3864.54859 | 151.1443 | 144.9613 | 138.9064 | 129.4678 | 151.8719 |
| 3865.51303 | 152.9233 | 146.4657 | 135.9922 | 127.1615 | 154.4362 |
| 3866.47748 | 153.99   | 146.1113 | 135.221  | 127.4715 | 156.9396 |
| 3867.44193 | 153.5908 | 145.1988 | 136.9291 | 129.33   | 156.5906 |
| 3868.40638 | 152.2489 | 144.6557 | 139.6442 | 130.878  | 153.8284 |
| 3869.37083 | 151.6233 | 145.6843 | 141.0985 | 130.4841 | 150.8822 |
| 3870.33528 | 153.0916 | 147.3898 | 137.2886 | 126.81   | 152.7893 |
| 3871.29973 | 153.6913 | 146.515  | 135.3542 | 126.4871 | 155.6155 |
| 3872.26418 | 152.4974 | 144.776  | 136.2549 | 128.2338 | 155.0376 |
| 3873.22863 | 150.9265 | 143.6896 | 137.8125 | 129.6813 | 152.7693 |
| 3874.19308 | 151.172  | 144.6028 | 136.6496 | 128.2972 | 152.4494 |
| 3875.15753 | 151.9937 | 144.6353 | 134.069  | 126.7282 | 154.7572 |
| 3876.12198 | 151.9544 | 143.6588 | 134.1182 | 127.7435 | 155.7954 |
| 3877.08643 | 152.3434 | 143.6495 | 134.7056 | 128.5047 | 156.3599 |
| 3878.05088 | 152.5118 | 143.8282 | 135.6278 | 129.0644 | 156.2754 |
| 3879.01533 | 151.651  | 143.6529 | 137.6987 | 130.215  | 154.3299 |
| 3879.97977 | 151.6084 | 144.75   | 138.7717 | 130.1315 | 152.7459 |
| 3880.94423 | 153.1565 | 146.4991 | 136.2353 | 127.502  | 154.5359 |
| 3881.90867 | 153.0597 | 145.4934 | 135.4341 | 127.6738 | 155.8877 |
| 3882.87312 | 152.5846 | 144.6569 | 136.1009 | 128.8124 | 155.7384 |
| 3883.83757 | 151.9004 | 144.2258 | 136.5287 | 128.9896 | 154.6477 |

|            |          |          |          |          |          |
|------------|----------|----------|----------|----------|----------|
| 3884.80202 | 150.5939 | 143.3885 | 137.9282 | 129.8484 | 152.4779 |
| 3885.76647 | 151.2057 | 144.515  | 136.6594 | 128.519  | 152.5129 |
| 3886.73092 | 152.5595 | 145.2216 | 133.7769 | 126.523  | 155.2573 |
| 3887.69537 | 152.5864 | 144.2898 | 134.2684 | 127.8046 | 156.3139 |
| 3888.65982 | 152.6212 | 143.9069 | 135.0242 | 128.72   | 156.3831 |
| 3889.62427 | 151.9777 | 143.4863 | 136.3106 | 129.4201 | 155.0276 |
| 3890.58872 | 151.0591 | 143.4359 | 137.7724 | 129.8997 | 152.841  |
| 3891.55317 | 151.7178 | 144.9435 | 136.4501 | 128.1565 | 152.996  |
| 3892.51762 | 152.0547 | 144.9203 | 134.7893 | 127.1477 | 154.5503 |
| 3893.48207 | 151.6124 | 143.8956 | 135.0022 | 128.1415 | 154.9238 |
| 3894.44652 | 151.8173 | 143.7576 | 134.7338 | 128.2615 | 155.4663 |
| 3895.41097 | 152.445  | 143.9365 | 134.8501 | 128.5462 | 156.4314 |
| 3896.37541 | 152.8714 | 144.1321 | 135.5553 | 129.1438 | 156.8577 |
| 3897.33986 | 152.6522 | 144.2961 | 136.95   | 129.8734 | 155.9762 |
| 3898.30431 | 152.347  | 144.783  | 138.5788 | 130.3073 | 154.4419 |
| 3899.26876 | 153.5235 | 146.491  | 138.1605 | 129.2482 | 154.9605 |
| 3900.23321 | 153.8481 | 146.4464 | 137.1535 | 128.3408 | 155.5915 |
| 3901.19766 | 153.1539 | 145.4172 | 138.8174 | 129.8939 | 154.5487 |
| 3902.16211 | 153.5787 | 146.2402 | 138.2332 | 128.8265 | 154.3539 |
| 3903.12656 | 152.5642 | 145.4376 | 138.1533 | 128.6759 | 153.6372 |
| 3904.09101 | 151.6602 | 145.0383 | 137.9495 | 128.849  | 152.6254 |
| 3905.05546 | 151.6421 | 145.0478 | 136.0192 | 127.4748 | 153.1071 |
| 3906.01991 | 151.9311 | 144.5984 | 135.1115 | 127.5547 | 154.3714 |
| 3906.98436 | 152.0142 | 143.9693 | 134.2749 | 127.8426 | 155.5049 |
| 3907.94881 | 151.6743 | 143.3007 | 134.1658 | 128.4892 | 155.8313 |
| 3908.91326 | 151.4367 | 143.0343 | 134.166  | 128.7057 | 155.7615 |
| 3909.8777  | 151.3173 | 142.9174 | 134.1543 | 128.6881 | 155.7478 |
| 3910.84215 | 151.3524 | 142.9264 | 134.2379 | 128.7032 | 155.8522 |
| 3911.8066  | 151.6096 | 143.0673 | 134.4271 | 128.8512 | 156.0711 |
| 3912.77105 | 152.0346 | 143.3422 | 134.6127 | 128.9654 | 156.4074 |
| 3913.7355  | 152.4513 | 143.6742 | 134.8869 | 129.067  | 156.7661 |
| 3914.69995 | 152.3763 | 143.7251 | 135.4479 | 129.3109 | 156.4627 |
| 3915.6644  | 151.6992 | 143.5188 | 136.4254 | 129.7095 | 155.059  |
| 3916.62885 | 151.8109 | 144.116  | 136.648  | 129.3122 | 154.3128 |
| 3917.5933  | 152.5793 | 144.7978 | 135.2391 | 128.0155 | 155.3238 |
| 3918.55775 | 152.1209 | 144.0207 | 135.1834 | 128.4315 | 155.448  |
| 3919.5222  | 151.7099 | 143.6665 | 135.8067 | 129.1928 | 154.8297 |
| 3920.48665 | 152.309  | 144.2577 | 134.9363 | 128.3846 | 155.5858 |
| 3921.4511  | 152.4758 | 144.0111 | 134.6536 | 128.3603 | 156.4307 |
| 3922.41555 | 152.1232 | 143.5353 | 135.4819 | 129.1406 | 155.9991 |
| 3923.38    | 151.7161 | 143.5467 | 136.2609 | 129.3967 | 154.8524 |
| 3924.34445 | 151.6583 | 143.9198 | 136.2873 | 129.0329 | 154.1496 |
| 3925.3089  | 152.2323 | 144.3791 | 135.1528 | 128.2047 | 155.0521 |
| 3926.27335 | 152.5168 | 144.1298 | 134.5372 | 128.2599 | 156.2448 |
| 3927.23779 | 152.3612 | 143.6916 | 134.9572 | 129.0135 | 156.4255 |
| 3928.20224 | 152.2679 | 143.6984 | 135.5317 | 129.3527 | 156.0358 |
| 3929.16669 | 152.4487 | 144.0913 | 135.9696 | 129.2884 | 155.8097 |
| 3930.13114 | 152.4942 | 144.3575 | 136.0292 | 128.9938 | 155.6134 |
| 3931.09559 | 151.8268 | 143.8671 | 136.2802 | 129.1601 | 154.7832 |
| 3932.06004 | 151.5154 | 143.7986 | 136.0231 | 128.9437 | 154.2538 |
| 3933.02449 | 151.621  | 143.9129 | 134.702  | 127.9563 | 154.8068 |
| 3933.98894 | 151.6075 | 143.5312 | 134.2909 | 128.1574 | 155.4619 |
| 3934.95339 | 151.794  | 143.4126 | 134.3129 | 128.5206 | 155.8915 |
| 3935.91784 | 151.8544 | 143.2567 | 134.4084 | 128.7545 | 156.1138 |

|            |          |          |          |          |          |
|------------|----------|----------|----------|----------|----------|
| 3936.88229 | 151.7552 | 143.1227 | 134.5467 | 128.919  | 156.039  |
| 3937.84674 | 151.7882 | 143.2045 | 134.6203 | 128.897  | 155.9555 |
| 3938.81119 | 152.1019 | 143.4579 | 134.5897 | 128.7904 | 156.1965 |
| 3939.77564 | 152.4384 | 143.6301 | 134.7546 | 128.9316 | 156.606  |
| 3940.74008 | 152.1906 | 143.4661 | 135.2515 | 129.2359 | 156.1983 |
| 3941.70453 | 151.5629 | 143.2215 | 136.0768 | 129.6292 | 155.0048 |
| 3942.66898 | 151.7569 | 143.7989 | 135.8427 | 129.0022 | 154.6883 |
| 3943.63343 | 152.3719 | 144.2149 | 134.8478 | 128.2183 | 155.6877 |
| 3944.59788 | 152.5621 | 144.0112 | 134.8506 | 128.7078 | 156.4674 |
| 3945.56233 | 152.4645 | 143.8195 | 135.1762 | 129.1447 | 156.5007 |
| 3946.52678 | 152.1708 | 143.6703 | 135.7503 | 129.499  | 155.9202 |
| 3947.49123 | 152.282  | 144.0109 | 135.8558 | 129.2335 | 155.5315 |
| 3948.45568 | 152.2484 | 144.0852 | 135.6176 | 128.8485 | 155.4059 |
| 3949.42013 | 152.0133 | 143.9042 | 135.6764 | 129.0682 | 155.261  |
| 3950.38458 | 152.2601 | 144.1144 | 135.1682 | 128.7579 | 155.7105 |
| 3951.34903 | 152.2619 | 143.8354 | 134.8112 | 128.7412 | 156.2226 |
| 3952.31348 | 152.0471 | 143.5007 | 134.9448 | 129.0986 | 156.2035 |
| 3953.27793 | 152.1336 | 143.5258 | 134.8345 | 128.9903 | 156.2329 |
| 3954.24238 | 152.1626 | 143.4582 | 134.7401 | 128.9885 | 156.374  |
| 3955.20683 | 152.0473 | 143.3704 | 134.7764 | 129.1177 | 156.325  |
| 3956.17128 | 151.9936 | 143.4224 | 134.8428 | 129.1487 | 156.1627 |
| 3957.13572 | 152.1636 | 143.5905 | 134.8784 | 129.099  | 156.2267 |
| 3958.10017 | 152.367  | 143.6726 | 134.8844 | 129.1097 | 156.437  |
| 3959.06462 | 152.4041 | 143.6286 | 134.9176 | 129.184  | 156.5345 |
| 3960.02907 | 152.2138 | 143.5064 | 135.0351 | 129.2539 | 156.3296 |
| 3960.99352 | 151.9318 | 143.3835 | 135.2361 | 129.3236 | 155.9161 |
| 3961.95797 | 151.9238 | 143.518  | 134.9739 | 129.0022 | 155.8233 |
| 3962.92242 | 152.0429 | 143.5072 | 134.6309 | 128.7779 | 156.1422 |
| 3963.88687 | 152.043  | 143.3558 | 134.727  | 129.0882 | 156.3196 |
| 3964.85132 | 152.0728 | 143.3285 | 134.7322 | 129.167  | 156.4036 |
| 3965.81577 | 152.1413 | 143.3089 | 134.7267 | 129.176  | 156.5302 |
| 3966.78022 | 152.2092 | 143.3394 | 134.8135 | 129.25   | 156.5862 |
| 3967.74467 | 152.2017 | 143.3707 | 134.9813 | 129.3422 | 156.448  |
| 3968.70912 | 152.2832 | 143.5143 | 135.0516 | 129.325  | 156.3588 |
| 3969.67357 | 152.4128 | 143.6578 | 134.9248 | 129.1945 | 156.4838 |
| 3970.63802 | 152.3529 | 143.5644 | 134.9323 | 129.2603 | 156.5087 |
| 3971.60246 | 152.3142 | 143.5876 | 135.1338 | 129.386  | 156.4362 |
| 3972.56691 | 152.3947 | 143.755  | 135.1711 | 129.301  | 156.4728 |
| 3973.53136 | 152.3499 | 143.7022 | 135.1458 | 129.2762 | 156.4637 |
| 3974.49581 | 152.1451 | 143.5078 | 135.0587 | 129.211  | 156.2643 |
| 3975.46026 | 152.0069 | 143.3984 | 134.8927 | 129.1196 | 156.1403 |
| 3976.42471 | 152.1735 | 143.5234 | 134.7523 | 129.0875 | 156.4133 |
| 3977.38916 | 152.3411 | 143.5684 | 134.7779 | 129.1959 | 156.7011 |
| 3978.35361 | 152.3903 | 143.5133 | 134.8862 | 129.359  | 156.7456 |
| 3979.31806 | 152.3925 | 143.5287 | 134.9532 | 129.4134 | 156.7052 |
| 3980.28251 | 152.2605 | 143.4826 | 134.9273 | 129.3585 | 156.5987 |
| 3981.24696 | 152.0676 | 143.3515 | 134.8723 | 129.3037 | 156.3865 |
| 3982.21141 | 152.0626 | 143.3497 | 134.773  | 129.2283 | 156.3218 |
| 3983.17586 | 152.1803 | 143.3857 | 134.7023 | 129.2076 | 156.4442 |
| 3984.14031 | 152.2651 | 143.3816 | 134.826  | 129.3167 | 156.6059 |
| 3985.10476 | 152.328  | 143.4469 | 134.9005 | 129.3962 | 156.6809 |
| 3986.0692  | 152.4574 | 143.5676 | 134.9585 | 129.455  | 156.8113 |
| 3987.03365 | 152.5376 | 143.6306 | 135.0036 | 129.4931 | 156.9299 |
| 3987.9981  | 152.5121 | 143.6347 | 135.0851 | 129.5159 | 156.8898 |

|            |          |          |          |          |          |
|------------|----------|----------|----------|----------|----------|
| 3988.96255 | 152.4088 | 143.5981 | 135.2145 | 129.5419 | 156.6789 |
| 3989.927   | 152.3886 | 143.6086 | 135.2579 | 129.4887 | 156.5269 |
| 3990.89145 | 152.4908 | 143.6636 | 135.1095 | 129.3627 | 156.6508 |
| 3991.8559  | 152.5629 | 143.6616 | 135.0401 | 129.3918 | 156.8589 |
| 3992.82035 | 152.5343 | 143.6109 | 135.1239 | 129.4981 | 156.8703 |
| 3993.7848  | 152.4386 | 143.5442 | 135.2063 | 129.5478 | 156.7115 |
| 3994.74925 | 152.4416 | 143.6307 | 135.2123 | 129.5102 | 156.6555 |
| 3995.7137  | 152.5243 | 143.7304 | 135.0289 | 129.3378 | 156.7785 |
| 3996.67815 | 152.5484 | 143.6912 | 134.9689 | 129.3896 | 156.8988 |
| 3997.6426  | 152.5432 | 143.6643 | 135.0192 | 129.4469 | 156.9637 |
| 3998.60705 | 152.5201 | 143.6088 | 135.039  | 129.4285 | 156.96   |
| 3999.5715  | 152.5661 | 143.6125 | 135.0616 | 129.4884 | 156.9676 |
| 4000.53595 | 152.6572 | 143.6999 | 135.1426 | 129.5805 | 157.0347 |

Figure 2. TGA curves of PPAs & Figure 3. DTG curves of PPAs

| PPU  |          |          |         | PPSA |          |          |         | PPSI |          |          |         | PPST |          |          |         | PPSY |          |          |         |
|------|----------|----------|---------|------|----------|----------|---------|------|----------|----------|---------|------|----------|----------|---------|------|----------|----------|---------|
| Time | Temp     | DTA      | TGA     |
| sec  | C        | uV       | mg      |
| 0    | 29.53559 | -0.67094 | 1.00012 | 0    | 29.31251 | -3.32511 | 1       | 0    | 32.08892 | -1.57854 | 0.99993 | 0    | 29.00771 | -0.92767 | 1.0002  | 0    | 29.74359 | -3.942   | 0.9999  |
| 1    | 29.55943 | -0.66642 | 1.00019 | 1    | 29.32418 | -3.32341 | 0.99992 | 1    | 32.13668 | -1.58623 | 0.99983 | 1    | 29.03096 | -0.94014 | 1.00027 | 1    | 29.75079 | -3.93769 | 0.99992 |
| 2    | 29.54162 | -0.65435 | 1.00021 | 2    | 29.3451  | -3.32701 | 1       | 2    | 32.13289 | -1.59324 | 0.99983 | 2    | 29.06793 | -0.94255 | 1.00017 | 2    | 29.75585 | -3.92801 | 1.00002 |
| 3    | 29.54328 | -0.65367 | 1.00012 | 3    | 29.35726 | -3.32111 | 1.00006 | 3    | 32.1395  | -1.59698 | 0.99993 | 3    | 29.04224 | -0.95107 | 1.00006 | 3    | 29.72306 | -3.92096 | 1       |
| 4    | 29.55349 | -0.65298 | 1.00008 | 4    | 29.32876 | -3.32201 | 0.99994 | 4    | 32.12024 | -1.60453 | 0.99993 | 4    | 29.05178 | -0.9531  | 1.00014 | 4    | 29.74281 | -3.92042 | 0.9999  |
| 5    | 29.58277 | -0.65488 | 1.00015 | 5    | 29.34948 | -3.32431 | 0.99986 | 5    | 32.16402 | -1.6169  | 0.99986 | 5    | 29.06948 | -0.97002 | 1.00022 | 5    | 29.74758 | -3.91394 | 0.9999  |
| 6    | 29.57178 | -0.64765 | 1.00017 | 6    | 29.3593  | -3.33015 | 0.99991 | 6    | 32.17005 | -1.63047 | 0.99986 | 6    | 29.11161 | -0.97683 | 1.00014 | 6    | 29.76626 | -3.9086  | 0.99998 |
| 7    | 29.56429 | -0.65003 | 1.00006 | 7    | 29.38946 | -3.32627 | 1       | 7    | 32.17773 | -1.6359  | 1       | 7    | 29.09332 | -0.98836 | 1       | 7    | 29.73659 | -3.8986  | 1       |
| 8    | 29.58744 | -0.64986 | 1       | 8    | 29.36183 | -3.32746 | 0.99994 | 8    | 32.16003 | -1.64715 | 1       | 8    | 29.11657 | -0.9955  | 1.00003 | 8    | 29.75731 | -3.90121 | 0.99992 |
| 9    | 29.62091 | -0.65409 | 1.00004 | 9    | 29.388   | -3.32979 | 0.99986 | 9    | 32.21451 | -1.66155 | 0.99989 | 9    | 29.12844 | -1.01005 | 1.00011 | 9    | 29.78543 | -3.89383 | 0.9999  |
| 10   | 29.625   | -0.64763 | 1.00008 | 10   | 29.41953 | -3.33781 | 0.99991 | 10   | 32.22346 | -1.67384 | 0.99986 | 10   | 29.1943  | -1.0177  | 1.00008 | 10   | 29.815   | -3.88486 | 0.99998 |
| 11   | 29.6321  | -0.65118 | 1       | 11   | 29.45679 | -3.32992 | 1.00005 | 11   | 32.25382 | -1.68126 | 0.99993 | 11   | 29.18204 | -1.01914 | 0.99994 | 11   | 29.79671 | -3.86715 | 1.00002 |
| 12   | 29.66673 | -0.64399 | 0.99996 | 12   | 29.43898 | -3.32176 | 1.00005 | 12   | 32.2438  | -1.68385 | 0.99993 | 12   | 29.21989 | -1.01722 | 0.99991 | 12   | 29.82599 | -3.85755 | 0.99991 |
| 13   | 29.7075  | -0.63602 | 1.00005 | 13   | 29.48218 | -3.31308 | 0.99991 | 13   | 32.29808 | -1.69331 | 0.99975 | 13   | 29.241   | -1.01992 | 1.00002 | 13   | 29.86812 | -3.83487 | 0.99985 |
| 14   | 29.74028 | -0.61604 | 1.00013 | 14   | 29.5101  | -3.29843 | 0.99994 | 14   | 32.33398 | -1.69186 | 0.99968 | 14   | 29.32107 | -1.00694 | 1.00002 | 14   | 29.9011  | -3.80512 | 0.99991 |
| 15   | 29.73843 | -0.59723 | 1.00007 | 15   | 29.57227 | -3.27848 | 1.00005 | 15   | 32.37533 | -1.68726 | 0.99975 | 15   | 29.32107 | -0.98779 | 0.99988 | 15   | 29.90723 | -3.7606  | 0.99993 |
| 16   | 29.78533 | -0.57113 | 1.00001 | 16   | 29.57042 | -3.24384 | 0.99999 | 16   | 32.37153 | -1.66874 | 0.99978 | 16   | 29.3773  | -0.96346 | 0.99983 | 16   | 29.93457 | -3.71844 | 0.99985 |
| 17   | 29.83261 | -0.54076 | 1.00003 | 17   | 29.60982 | -3.21049 | 0.9999  | 17   | 32.43526 | -1.6587  | 0.99964 | 17   | 29.39481 | -0.93439 | 0.99993 | 17   | 29.99051 | -3.66544 | 0.99977 |
| 18   | 29.88193 | -0.4922  | 1.00007 | 18   | 29.65671 | -3.16906 | 0.9999  | 18   | 32.4911  | -1.62915 | 0.99954 | 18   | 29.49356 | -0.90259 | 0.99995 | 18   | 30.03565 | -3.60348 | 0.99981 |
| 19   | 29.88836 | -0.44596 | 0.99999 | 19   | 29.72024 | -3.11917 | 1.00001 | 19   | 32.52963 | -1.59842 | 0.99962 | 19   | 29.50524 | -0.84874 | 0.99985 | 19   | 30.05676 | -3.52553 | 0.99987 |
| 20   | 29.94877 | -0.39294 | 0.99987 | 20   | 29.72705 | -3.05439 | 0.99998 | 20   | 32.55113 | -1.55262 | 0.99974 | 20   | 29.55641 | -0.79898 | 0.99976 | 20   | 30.08245 | -3.4491  | 0.99979 |
| 21   | 29.99674 | -0.33278 | 0.99985 | 21   | 29.77784 | -2.99015 | 0.99984 | 21   | 32.60542 | -1.51185 | 0.99966 | 21   | 29.58803 | -0.73965 | 0.99984 | 21   | 30.16242 | -3.36487 | 0.9997  |
| 22   | 30.06523 | -0.25828 | 0.99991 | 22   | 29.84283 | -2.9173  | 0.99972 | 22   | 32.67371 | -1.45489 | 0.99959 | 22   | 29.69135 | -0.67583 | 0.99987 | 22   | 30.20445 | -3.26988 | 0.99974 |
| 23   | 30.07778 | -0.1781  | 0.99985 | 23   | 29.9048  | -2.8376  | 0.99975 | 23   | 32.72323 | -1.3935  | 0.99966 | 23   | 29.71139 | -0.59481 | 0.99976 | 23   | 30.24209 | -3.15818 | 0.9998  |
| 24   | 30.14247 | -0.09783 | 0.99975 | 24   | 29.93953 | -2.73819 | 0.99972 | 24   | 32.7604  | -1.31735 | 0.9998  | 24   | 29.74404 | -0.51686 | 0.99964 | 24   | 30.27663 | -3.04776 | 0.99976 |
| 25   | 30.20882 | -0.0064  | 0.99977 | 25   | 29.98049 | -2.64046 | 0.99952 | 25   | 32.8032  | -1.24526 | 0.99969 | 25   | 29.81724 | -0.4273  | 0.9997  | 25   | 30.35563 | -2.93071 | 0.99966 |
| 26   | 30.28656 | 0.00255  | 0.99983 | 26   | 30.05443 | -2.53549 | 0.9994  | 26   | 32.8967  | -1.16139 | 0.99955 | 26   | 29.91453 | -0.33615 | 0.99975 | 26   | 30.40982 | -2.80721 | 0.99968 |
| 27   | 30.29823 | 0.20372  | 0.9998  | 27   | 30.13216 | -2.42427 | 0.99945 | 27   | 32.95488 | -1.07123 | 0.99954 | 27   | 29.95889 | -0.22567 | 0.99969 | 27   | 30.46819 | -2.6648  | 0.99976 |
| 28   | 30.37032 | 0.31144  | 0.99969 | 28   | 30.18061 | -2.29542 | 0.99948 | 28   | 33.00352 | -0.96576 | 0.99968 | 28   | 30.01882 | -0.12053 | 0.99958 | 28   | 30.49067 | -2.52129 | 0.99973 |
| 29   | 30.44426 | 0.42918  | 0.99967 | 29   | 30.21826 | -2.16825 | 0.99934 | 29   | 33.04652 | -0.86558 | 0.99957 | 29   | 30.0732  | -0.00632 | 0.9996  | 29   | 30.58796 | -2.3765  | 0.99963 |
| 30   | 30.5218  | 0.55265  | 0.99972 | 30   | 30.30358 | -2.0346  | 0.99925 | 30   | 33.15237 | -0.75417 | 0.9994  | 30   | 30.18003 | 0.1127   | 0.99968 | 30   | 30.64895 | -2.22153 | 0.99963 |
| 31   | 30.5643  | 0.68936  | 0.99974 | 31   | 30.37771 | -1.89176 | 0.99927 | 31   | 33.20996 | -0.63706 | 0.99939 | 31   | 30.24219 | 0.25029  | 0.99963 | 31   | 30.71093 | -2.0532  | 0.99969 |
| 32   | 30.62415 | 0.8227   | 0.99962 | 32   | 30.44387 | -1.73928 | 0.99933 | 32   | 33.27836 | -0.50712 | 0.99949 | 32   | 30.29483 | 0.38077  | 0.99951 | 32   | 30.74507 | -1.88393 | 0.99968 |
| 33   | 30.7084  | 0.9639   | 0.99958 | 33   | 30.48668 | -1.58216 | 0.99924 | 33   | 33.31863 | -0.37402 | 0.99949 | 33   | 30.36779 | 0.52391  | 0.99954 | 33   | 30.84713 | -1.71167 | 0.99958 |
| 34   | 30.79703 | 1.10966  | 0.99964 | 34   | 30.57628 | -1.42179 | 0.99912 | 34   | 33.43139 | -0.24055 | 0.99935 | 34   | 30.46479 | 0.66621  | 0.99958 | 34   | 30.91319 | -1.53158 | 0.99956 |
| 35   | 30.84713 | 1.27351  | 0.99967 | 35   | 30.66296 | -1.25411 | 0.99918 | 35   | 33.49969 | -0.09814 | 0.99931 | 35   | 30.54651 | 0.82805  | 0.99958 | 35   | 30.99763 | -1.3439  | 0.99962 |
| 36   | 30.91173 | 1.43022  | 0.99959 | 36   | 30.74537 | -1.07449 | 0.99923 | 36   | 33.57304 | 0.05858  | 0.99937 | 36   | 30.6402  | 0.98226  | 0.99944 | 36   | 31.03626 | -1.14783 | 0.99966 |
| 37   | 31.00079 | 1.59339  | 0.99955 | 37   | 30.78321 | -0.89465 | 0.99914 | 37   | 33.61926 | 0.21434  | 0.99937 | 37   | 30.6761  | 1.15093  | 0.99947 | 37   | 31.13549 | -0.95929 | 0.99959 |
| 38   | 31.09696 | 1.76246  | 0.99962 | 38   | 30.88614 | -0.70789 | 0.99902 | 38   | 33.74242 | 0.37263  | 0.99919 | 38   | 30.77942 | 1.31458  | 0.99957 | 38   | 31.21634 | -0.75311 | 0.99953 |
| 39   | 31.16341 | 1.94534  | 0.9997  | 39   | 30.97701 | -0.51856 | 0.99902 | 39   | 33.81276 | 0.5392   | 0.99912 | 39   | 30.88069 | 1.49551  | 0.9996  | 39   | 31.30205 | -0.54699 | 0.99957 |
| 40   | 31.22743 | 2.1237   | 0.99966 | 40   | 31.0671  | -0.31672 | 0.99913 | 40   | 33.90528 | 0.7145   | 0.99918 | 40   | 30.92769 | 1.67421  | 0.99948 | 40   | 31.34885 | -0.32878 | 0.99963 |
| 41   | 31.2608  | 2.30817  | 0.99962 | 41   | 31.11389 | -0.11182 | 0.9991  | 41   | 33.9513  | 0.89552  | 0.99921 | 41   | 31.02264 | 1.85902  | 0.99945 | 41   | 31.44992 | -0.11961 | 0.99952 |
| 42   | 31.42317 | 2.49411  | 0.99967 | 42   | 31.22266 | 0.09224  | 0.99895 | 42   | 34.07281 | 1.06983  | 0.99914 | 42   | 31.12596 | 2.04113  | 0.99955 | 42   | 31.54595 | 0.10749  | 0.99942 |
| 43   | 31.50966 | 2.69568  | 0.99971 | 43   | 31.31314 | 0.30811  | 0.99895 | 43   | 34.16611 | 1.25932  | 0.9991  | 43   | 31.23482 | 2.23821  | 0.99958 | 43   | 31.62816 | 0.33125  | 0.99944 |
| 44   | 31.5622  | 2.89307  | 0.99963 | 44   | 31.41559 | 0.52438  | 0.999   | 44   | 34.26194 | 1.44901  | 0.9992  | 44   | 31.29154 | 2.43324  | 0.99947 | 44   | 31.69373 | 0.56635  | 0.99944 |
| 45   | 31.67622 | 3.09512  | 0.99953 | 45   | 31.47035 | 0.75116  | 0.999   | 45   | 34.31506 | 1.6513   | 0.99933 | 45   | 31.39301 | 2.63778  | 0.99938 | 45   | 31.78567 | 0.79315  | 0.99935 |
| 46   | 31.77633 | 3.30094  | 0.99958 | 46   | 31.57261 | 0.96819  | 0.99885 | 46   | 34.42655 | 1.84312  | 0.99925 | 46   | 31.4868  | 2.83566  | 0.99949 | 46   | 31.90163 | 1.03268  | 0.99927 |
| 47   | 31.86836 | 3.51629  | 0.99964 | 47   | 31.68205 | 1.19878  | 0.99879 | 47   | 34.53172 | 2.05043  | 0.99915 | 47   | 31.61502 | 3.04871  | 0.99954 | 47   | 31.99124 | 1.27273  | 0.99927 |
| 48   | 31.93695 | 3.73095  | 0.99966 | 48   | 31.79083 | 1.4302   | 0.99884 | 48   | 34.62531 | 2.25562  | 0.99921 | 48   | 31.67058 | 3.26181  | 0.99942 | 48   | 32.06187 | 1.52148  | 0.9993  |
| 49   | 32.05078 | 3.94554  | 0.99963 | 49   | 31.85309 | 1.6712   | 0.99887 | 49   | 34.70226 | 2.47149  | 0.99928 | 49   | 31.78012 | 3.478    | 0.99934 | 49   | 32.15361 | 1.76134  | 0.99928 |
| 50   | 32.1503  | 4.16459  | 0.99969 | 50   | 31.95903 | 1.90182  | 0.99875 | 50   | 34.80792 | 2.6796   | 0.99916 | 50   | 31.88052 | 3.69278  | 0.99939 | 50   | 32.28631 | 2.01454  | 0.9992  |
| 51   | 32.26121 | 4.38942  | 0.99984 | 51   | 32.07733 | 2.14722  | 0.99872 | 51   | 34.92739 | 2.89928  | 0.99902 | 51   | 32.01186 | 3.91386  | 0.99944 | 51   | 32.36774 | 2.2672   | 0.99921 |
| 52   | 32.32036 | 4.61907  | 0.99985 | 52   | 32.18173 | 2.39259  | 0.99882 | 52   | 35.02215 | 3.11802  | 0.99905 | 52   | 32.07247 | 4.14135  | 0.9993  | 52   | 32.45579 | 2.52794  | 0.99929 |
| 53   | 32.43896 | 4.84183  | 0.99977 | 53   | 32.25907 | 2.64588  | 0.99889 | 53   | 35.11292 | 3.34791  | 0.99918 | 53   | 32.19389 | 4.36471  | 0.99918 | 53   | 32.54432 | 2.781    |         |



|     |          |          |         |     |          |          |         |     |          |          |         |     |          |          |         |     |          |          |         |
|-----|----------|----------|---------|-----|----------|----------|---------|-----|----------|----------|---------|-----|----------|----------|---------|-----|----------|----------|---------|
| 107 | 39.45167 | 17.7698  | 0.99886 | 107 | 39.30321 | 16.59148 | 0.99824 | 107 | 42.16017 | 16.34105 | 0.99979 | 107 | 39.34465 | 17.09856 | 0.99781 | 107 | 39.58554 | 17.02079 | 0.9991  |
| 108 | 39.58943 | 17.98169 | 0.99886 | 108 | 39.49545 | 16.81209 | 0.99848 | 108 | 42.32838 | 16.54529 | 0.99799 | 108 | 39.47803 | 17.306   | 0.99778 | 108 | 39.71308 | 17.25848 | 0.99895 |
| 109 | 39.73078 | 18.19764 | 0.99893 | 109 | 39.63117 | 17.05432 | 0.99845 | 109 | 42.48988 | 16.76493 | 0.99819 | 109 | 39.62864 | 17.53232 | 0.99778 | 109 | 39.85979 | 17.48098 | 0.99891 |
| 110 | 39.85717 | 18.40268 | 0.99895 | 110 | 39.76542 | 17.27138 | 0.99853 | 110 | 42.62803 | 16.98837 | 0.99876 | 110 | 39.72213 | 17.72673 | 0.99776 | 110 | 39.98286 | 17.71385 | 0.99901 |
| 111 | 40.05281 | 18.61021 | 0.99888 | 111 | 39.88703 | 17.51928 | 0.99881 | 111 | 42.7686  | 17.19414 | 0.99869 | 111 | 39.93218 | 17.90992 | 0.99765 | 111 | 40.1718  | 17.92888 | 0.999   |
| 112 | 40.18668 | 18.81403 | 0.99886 | 112 | 40.07723 | 17.73955 | 0.99877 | 112 | 42.92651 | 17.38892 | 0.99837 | 112 | 40.07908 | 18.09295 | 0.99745 | 112 | 40.3184  | 18.16114 | 0.99894 |
| 113 | 40.33621 | 19.02233 | 0.99891 | 113 | 40.22803 | 17.96282 | 0.99834 | 113 | 43.11223 | 17.9515  | 0.99795 | 113 | 40.23367 | 18.28057 | 0.99766 | 113 | 40.45743 | 18.37873 | 0.99891 |
| 114 | 40.45919 | 19.22184 | 0.99895 | 114 | 40.37338 | 18.18079 | 0.99847 | 114 | 43.23884 | 17.79433 | 0.99788 | 114 | 40.34604 | 18.48775 | 0.99801 | 114 | 40.58799 | 18.60306 | 0.99891 |
| 115 | 40.65279 | 19.42001 | 0.99899 | 115 | 40.50267 | 18.39721 | 0.99858 | 115 | 43.3929  | 18.00174 | 0.99766 | 115 | 40.54791 | 18.65801 | 0.99827 | 115 | 40.76866 | 18.81419 | 0.99886 |
| 116 | 40.78656 | 19.61755 | 0.99886 | 116 | 40.68382 | 18.61368 | 0.99829 | 116 | 43.53698 | 18.18869 | 0.99724 | 116 | 40.68868 | 18.85379 | 0.99845 | 116 | 40.92996 | 19.03196 | 0.99872 |
| 117 | 40.94455 | 19.81815 | 0.99893 | 117 | 40.83958 | 18.82828 | 0.99803 | 117 | 43.72709 | 18.38589 | 0.99713 | 117 | 40.84512 | 19.05935 | 0.99831 | 117 | 41.05877 | 19.24343 | 0.99857 |
| 118 | 41.05955 | 20.01327 | 0.99897 | 118 | 40.98483 | 19.03219 | 0.99778 | 118 | 43.85989 | 18.58161 | 0.99726 | 118 | 40.96683 | 19.26938 | 0.99863 | 118 | 41.20607 | 19.45837 | 0.99849 |
| 119 | 41.25734 | 20.20187 | 0.99888 | 119 | 41.12317 | 19.25001 | 0.99776 | 119 | 44.00912 | 18.78149 | 0.99753 | 119 | 41.15898 | 19.46956 | 0.99876 | 119 | 41.37807 | 19.65683 | 0.99844 |
| 120 | 41.40395 | 20.39272 | 0.99882 | 120 | 41.29887 | 19.46025 | 0.99744 | 120 | 44.1465  | 18.97306 | 0.99772 | 120 | 41.2909  | 19.65873 | 0.99883 | 120 | 41.54579 | 19.86627 | 0.9983  |
| 121 | 41.55659 | 20.58338 | 0.99886 | 121 | 41.46524 | 19.67228 | 0.99707 | 121 | 44.34711 | 19.16154 | 0.99781 | 121 | 41.46485 | 19.8612  | 0.99856 | 121 | 41.67908 | 20.06577 | 0.99817 |
| 122 | 41.6818  | 20.77329 | 0.99889 | 122 | 41.60446 | 19.8716  | 0.99698 | 122 | 44.48438 | 19.35002 | 0.99797 | 122 | 41.57868 | 20.05214 | 0.99841 | 122 | 41.82997 | 20.27189 | 0.99817 |
| 123 | 41.87813 | 20.95004 | 0.99881 | 123 | 41.74932 | 20.08087 | 0.99714 | 123 | 44.64092 | 19.54459 | 0.99817 | 123 | 41.77958 | 20.22303 | 0.99846 | 123 | 41.98924 | 20.46054 | 0.9982  |
| 124 | 42.01968 | 21.13567 | 0.99873 | 124 | 41.91033 | 20.27167 | 0.99738 | 124 | 44.77187 | 19.73035 | 0.99823 | 124 | 41.9294  | 20.40212 | 0.99828 | 124 | 42.17388 | 20.66091 | 0.99816 |
| 125 | 42.18303 | 21.31356 | 0.99878 | 125 | 42.10306 | 20.46855 | 0.99746 | 125 | 44.98648 | 19.90899 | 0.99805 | 125 | 42.08244 | 20.56295 | 0.9982  | 125 | 42.29676 | 20.85412 | 0.99807 |
| 126 | 42.30386 | 21.4979  | 0.99885 | 126 | 42.22778 | 20.6576  | 0.99757 | 126 | 45.11811 | 20.09006 | 0.99797 | 126 | 42.21621 | 20.74175 | 0.99833 | 126 | 42.45281 | 21.05089 | 0.99805 |
| 127 | 42.49153 | 21.66556 | 0.99879 | 127 | 42.3887  | 20.85226 | 0.9977  | 127 | 45.2835  | 20.26603 | 0.99796 | 127 | 42.40543 | 20.90784 | 0.99832 | 127 | 42.61052 | 21.23421 | 0.9981  |
| 128 | 42.6505  | 21.8428  | 0.99873 | 128 | 42.53648 | 21.03585 | 0.99772 | 128 | 45.41231 | 20.44619 | 0.99789 | 128 | 42.56566 | 21.07748 | 0.99829 | 128 | 42.80596 | 21.42559 | 0.99808 |
| 129 | 42.80344 | 22.01263 | 0.99874 | 129 | 42.72726 | 21.22519 | 0.99763 | 129 | 45.61827 | 20.61093 | 0.99771 | 129 | 42.71957 | 21.24228 | 0.99823 | 129 | 42.92106 | 21.61198 | 0.99799 |
| 130 | 42.93711 | 22.18871 | 0.99881 | 130 | 42.86356 | 21.40907 | 0.99757 | 130 | 45.76255 | 20.7841  | 0.99756 | 130 | 42.85441 | 21.41787 | 0.99814 | 130 | 43.09287 | 21.80085 | 0.99799 |
| 131 | 43.1168  | 22.34889 | 0.99879 | 131 | 43.027   | 21.60082 | 0.99759 | 131 | 45.92151 | 20.9533  | 0.99773 | 131 | 43.03537 | 21.5826  | 0.99816 | 131 | 43.23724 | 21.97819 | 0.99804 |
| 132 | 43.28851 | 22.51873 | 0.99869 | 132 | 43.16583 | 21.77602 | 0.99758 | 132 | 46.05315 | 21.12647 | 0.99796 | 132 | 43.20495 | 21.75034 | 0.99799 | 132 | 43.44009 | 22.15998 | 0.99806 |
| 133 | 43.43814 | 22.67971 | 0.99868 | 133 | 43.37627 | 21.95553 | 0.99749 | 133 | 46.26378 | 21.28169 | 0.99798 | 133 | 43.35204 | 21.91188 | 0.99801 | 133 | 43.56656 | 22.33886 | 0.99797 |
| 134 | 43.58339 | 22.84819 | 0.99875 | 134 | 43.5005  | 22.13541 | 0.9974  | 134 | 46.40684 | 21.4512  | 0.99787 | 134 | 43.49749 | 22.07983 | 0.99806 | 134 | 43.73964 | 22.51736 | 0.99793 |
| 135 | 43.75073 | 23.02023 | 0.99877 | 135 | 43.66852 | 22.31291 | 0.99745 | 135 | 46.56556 | 21.60706 | 0.99786 | 135 | 43.67406 | 22.22865 | 0.99797 | 135 | 43.87691 | 22.68805 | 0.99798 |
| 136 | 43.93081 | 23.16273 | 0.99869 | 136 | 43.81007 | 22.48174 | 0.99752 | 136 | 46.70546 | 21.77118 | 0.99802 | 136 | 43.85337 | 22.39216 | 0.99799 | 136 | 44.08734 | 22.86002 | 0.99797 |
| 137 | 44.07995 | 23.31557 | 0.99868 | 137 | 44.01798 | 22.65227 | 0.99743 | 137 | 46.89576 | 21.91776 | 0.99794 | 137 | 43.99142 | 22.54334 | 0.99809 | 137 | 44.20533 | 23.03397 | 0.99787 |
| 138 | 44.22559 | 23.47733 | 0.99875 | 138 | 44.14796 | 22.82162 | 0.99734 | 138 | 47.06728 | 22.07661 | 0.9977  | 138 | 44.15253 | 22.69536 | 0.99822 | 138 | 44.38155 | 23.20194 | 0.99783 |
| 139 | 44.38271 | 23.62178 | 0.99878 | 139 | 44.32473 | 22.98801 | 0.99736 | 139 | 47.21836 | 22.22475 | 0.99769 | 139 | 44.32288 | 22.83732 | 0.99818 | 139 | 44.52553 | 23.36719 | 0.99788 |
| 140 | 44.58011 | 23.77663 | 0.9987  | 140 | 44.45111 | 23.15255 | 0.99746 | 140 | 47.36109 | 22.37853 | 0.99771 | 140 | 44.50082 | 22.98852 | 0.99796 | 140 | 44.73013 | 23.53113 | 0.99789 |
| 141 | 44.71592 | 23.92442 | 0.99868 | 141 | 44.67214 | 23.31357 | 0.99746 | 141 | 47.54739 | 22.51416 | 0.99773 | 141 | 44.64626 | 23.13003 | 0.9979  | 141 | 44.85611 | 23.69622 | 0.99783 |
| 142 | 44.87976 | 24.07555 | 0.99871 | 142 | 44.80436 | 23.48013 | 0.99731 | 142 | 47.72348 | 22.66557 | 0.99766 | 142 | 44.81214 | 23.27559 | 0.99789 | 142 | 45.03084 | 23.85655 | 0.99777 |
| 143 | 45.02792 | 24.2145  | 0.99875 | 143 | 44.9749  | 23.63763 | 0.99727 | 143 | 47.8701  | 22.79445 | 0.99758 | 143 | 44.96225 | 23.41004 | 0.99791 | 143 | 45.16029 | 24.01784 | 0.99784 |
| 144 | 45.23252 | 24.36028 | 0.99866 | 144 | 45.11101 | 23.7977  | 0.99741 | 144 | 48.2008  | 22.94033 | 0.99768 | 144 | 45.16656 | 23.55479 | 0.99769 | 144 | 45.37943 | 24.16835 | 0.99789 |
| 145 | 45.37301 | 24.50225 | 0.9986  | 145 | 45.32621 | 23.95015 | 0.99743 | 145 | 48.19163 | 23.06642 | 0.9977  | 145 | 45.2942  | 23.69572 | 0.99768 | 145 | 45.52399 | 24.33062 | 0.99783 |
| 146 | 45.53985 | 24.64546 | 0.99867 | 146 | 45.4629  | 24.11024 | 0.99734 | 146 | 48.37979 | 23.20095 | 0.99755 | 146 | 45.4629  | 23.87349 | 0.99778 | 146 | 45.68092 | 24.47843 | 0.99776 |
| 147 | 45.67762 | 24.77883 | 0.99871 | 147 | 45.63121 | 24.2575  | 0.99733 | 147 | 48.52699 | 23.32884 | 0.99744 | 147 | 45.61626 | 23.96773 | 0.99793 | 147 | 45.83639 | 24.62953 | 0.9978  |
| 148 | 45.8932  | 24.91472 | 0.99864 | 148 | 45.77403 | 24.41204 | 0.99743 | 148 | 48.69169 | 23.45258 | 0.99747 | 148 | 45.8216  | 24.10579 | 0.99793 | 148 | 46.03807 | 24.7758  | 0.99785 |
| 149 | 46.02961 | 25.04915 | 0.99858 | 149 | 45.97989 | 24.55342 | 0.99748 | 149 | 48.84609 | 23.56404 | 0.99756 | 149 | 45.9508  | 24.23676 | 0.99792 | 149 | 46.18205 | 24.92817 | 0.99777 |
| 150 | 46.1982  | 25.18432 | 0.99863 | 150 | 46.13244 | 24.70711 | 0.99739 | 150 | 49.04086 | 23.68089 | 0.99745 | 150 | 46.13467 | 24.36875 | 0.99799 | 150 | 46.3382  | 25.0695  | 0.99768 |
| 151 | 46.33615 | 25.31334 | 0.99869 | 151 | 46.29024 | 24.84802 | 0.9973  | 151 | 49.18028 | 23.79312 | 0.99737 | 151 | 46.28197 | 24.49403 | 0.99812 | 151 | 46.4989  | 25.21432 | 0.99768 |
| 152 | 46.55399 | 25.44226 | 0.99862 | 152 | 46.43811 | 24.99201 | 0.99735 | 152 | 49.34547 | 23.90162 | 0.99746 | 152 | 46.48948 | 24.62031 | 0.99809 | 152 | 46.6932  | 25.35098 | 0.99775 |
| 153 | 46.68824 | 25.57244 | 0.99854 | 153 | 46.643   | 25.12319 | 0.99739 | 153 | 49.49266 | 23.99882 | 0.99759 | 153 | 46.6218  | 24.74542 | 0.998   | 153 | 46.84954 | 25.49746 | 0.99773 |
| 154 | 46.86248 | 25.7003  | 0.99857 | 154 | 46.80275 | 25.26859 | 0.99733 | 154 | 49.69899 | 24.09552 | 0.99755 | 154 | 46.79555 | 24.87038 | 0.99794 | 154 | 47.00355 | 25.63034 | 0.99766 |
| 155 | 46.99869 | 25.8247  | 0.99863 | 155 | 46.95248 | 25.40039 | 0.99729 | 155 | 49.83045 | 24.1831  | 0.99747 | 155 | 46.9372  | 24.98879 | 0.99796 | 155 | 47.16466 | 25.76709 | 0.99766 |
| 156 | 47.21759 | 25.94467 | 0.9986  | 156 | 47.11748 | 25.53781 | 0.99743 | 156 | 50.00051 | 24.26935 | 0.99753 | 156 | 47.16009 | 25.10589 | 0.99795 | 156 | 47.36284 | 25.89475 | 0.99773 |
| 157 | 47.35943 | 26.06781 | 0.99852 | 157 | 47.30583 | 25.66152 | 0.99759 | 157 | 50.13448 | 24.33898 | 0.99766 | 157 | 47.28209 | 25.22421 | 0.99784 | 157 | 47.52881 | 26.03362 | 0.99773 |
| 158 | 47.53095 | 26.18621 | 0.99855 | 158 | 47.47871 | 25.79704 | 0.99758 | 158 | 50.34822 | 24.40504 | 0.99758 | 158 | 47.46363 | 25.33525 | 0.9978  | 158 | 47.67182 | 26.15881 | 0.99764 |
| 159 | 47.66589 | 26.30827 | 0.99863 | 159 | 47.62357 | 25.92209 | 0.99752 | 159 | 50.48472 | 24.46349 | 0.99747 | 159 | 47.60829 | 25.44721 | 0.9979  | 159 | 47.8     |          |         |

|     |          |          |         |     |          |          |         |     |          |          |         |     |          |          |         |     |          |          |         |
|-----|----------|----------|---------|-----|----------|----------|---------|-----|----------|----------|---------|-----|----------|----------|---------|-----|----------|----------|---------|
| 220 | 57.64053 | 23.12064 | 0.99818 | 220 | 57.49538 | 18.2891  | 0.99678 | 220 | 60.55529 | 12.38668 | 0.99691 | 220 | 57.55726 | 17.79173 | 0.99727 | 220 | 58.0077  | 26.28925 | 0.99718 |
| 221 | 57.78257 | 22.36751 | 0.99821 | 221 | 57.65279 | 17.61257 | 0.99669 | 221 | 60.69762 | 12.74546 | 0.99676 | 221 | 57.7206  | 17.32482 | 0.99729 | 221 | 58.17786 | 25.93673 | 0.99712 |
| 222 | 57.95945 | 21.59174 | 0.99825 | 222 | 57.8354  | 16.95286 | 0.99668 | 222 | 60.89531 | 13.11536 | 0.99668 | 222 | 57.88113 | 16.86801 | 0.99737 | 222 | 58.33508 | 25.57663 | 0.99717 |
| 223 | 58.06734 | 20.78877 | 0.99818 | 223 | 58.00235 | 16.30845 | 0.99676 | 223 | 61.06887 | 13.48198 | 0.99681 | 223 | 58.01607 | 16.41064 | 0.99733 | 223 | 58.46875 | 25.15668 | 0.99723 |
| 224 | 58.22212 | 19.97071 | 0.99816 | 224 | 58.13875 | 15.69117 | 0.99684 | 224 | 61.28563 | 13.85883 | 0.99684 | 224 | 58.21025 | 15.95998 | 0.99724 | 224 | 58.614   | 24.71282 | 0.99718 |
| 225 | 58.36923 | 19.13077 | 0.99821 | 225 | 58.29684 | 15.08951 | 0.99674 | 225 | 61.43087 | 14.23417 | 0.99672 | 225 | 58.37127 | 15.51795 | 0.99724 | 225 | 58.79534 | 24.24995 | 0.99712 |
| 226 | 58.55573 | 18.29787 | 0.99827 | 226 | 58.48315 | 14.51204 | 0.99665 | 226 | 61.62672 | 14.61033 | 0.99668 | 226 | 58.53675 | 15.0929  | 0.99737 | 226 | 58.94575 | 23.76066 | 0.99717 |
| 227 | 58.65865 | 17.46761 | 0.9982  | 227 | 58.66011 | 13.96541 | 0.99673 | 227 | 61.78967 | 14.98144 | 0.9968  | 227 | 58.66994 | 14.67624 | 0.99738 | 227 | 59.07631 | 23.25372 | 0.99723 |
| 228 | 58.82697 | 16.64914 | 0.99816 | 228 | 58.80906 | 13.45866 | 0.99678 | 228 | 62.01237 | 15.34581 | 0.99683 | 228 | 58.86802 | 14.27434 | 0.99729 | 228 | 59.2204  | 22.70985 | 0.99718 |
| 229 | 58.97727 | 15.82256 | 0.99821 | 229 | 58.95703 | 12.97695 | 0.99666 | 229 | 62.16229 | 15.716   | 0.99668 | 229 | 59.02864 | 13.88981 | 0.99726 | 229 | 59.40369 | 22.154   | 0.99712 |
| 230 | 59.15978 | 15.02073 | 0.99825 | 230 | 59.15278 | 12.53562 | 0.99656 | 230 | 62.34908 | 16.07663 | 0.99666 | 230 | 59.20473 | 13.53087 | 0.99736 | 230 | 59.54767 | 21.5732  | 0.99711 |
| 231 | 59.27634 | 14.24137 | 0.99821 | 231 | 59.32323 | 12.13183 | 0.99658 | 231 | 62.51894 | 16.42379 | 0.99669 | 231 | 59.33471 | 13.1961  | 0.99741 | 231 | 59.69098 | 20.97943 | 0.99719 |
| 232 | 59.4425  | 13.47332 | 0.99814 | 232 | 59.48307 | 11.77796 | 0.99666 | 232 | 62.73667 | 16.76455 | 0.99675 | 232 | 59.53318 | 12.87947 | 0.99729 | 232 | 59.81901 | 20.35994 | 0.99718 |
| 233 | 59.57598 | 12.72118 | 0.9982  | 233 | 59.63533 | 11.46047 | 0.99659 | 233 | 62.8937  | 17.10923 | 0.99664 | 233 | 59.70781 | 12.5973  | 0.9972  | 233 | 60.00639 | 19.72318 | 0.9971  |
| 234 | 59.76511 | 11.98193 | 0.99827 | 234 | 59.84129 | 11.18881 | 0.99647 | 234 | 63.07758 | 17.4373  | 0.99653 | 234 | 59.88137 | 12.3455  | 0.99728 | 234 | 60.14998 | 19.07317 | 0.99711 |
| 235 | 59.88448 | 11.26768 | 0.99822 | 235 | 60.01261 | 10.96311 | 0.99649 | 235 | 63.24335 | 17.76277 | 0.99655 | 235 | 60.02575 | 12.13067 | 0.99733 | 235 | 60.28891 | 18.41584 | 0.99721 |
| 236 | 60.04297 | 10.55711 | 0.99818 | 236 | 60.19308 | 10.79193 | 0.99663 | 236 | 63.45923 | 18.07695 | 0.99668 | 236 | 60.2318  | 11.97577 | 0.99723 | 236 | 60.41966 | 17.74153 | 0.99726 |
| 237 | 60.19483 | 9.86037  | 0.99821 | 237 | 60.33892 | 10.66447 | 0.99659 | 237 | 63.6221  | 18.393   | 0.9966  | 237 | 60.40128 | 11.79393 | 0.9972  | 237 | 60.61531 | 17.06031 | 0.9972  |
| 238 | 60.38143 | 9.17623  | 0.99828 | 238 | 60.53314 | 10.58119 | 0.99647 | 238 | 63.79527 | 18.69321 | 0.99645 | 238 | 60.58602 | 11.674   | 0.99733 | 238 | 60.75113 | 16.37992 | 0.99717 |
| 239 | 60.51044 | 8.51295  | 0.99824 | 239 | 60.73498 | 10.54578 | 0.99646 | 239 | 63.97087 | 18.99251 | 0.99648 | 239 | 60.73459 | 11.60202 | 0.99743 | 239 | 60.90844 | 15.70501 | 0.99727 |
| 240 | 60.67291 | 7.85798  | 0.99816 | 240 | 60.91788 | 10.56811 | 0.99651 | 240 | 64.17479 | 19.2762  | 0.99646 | 240 | 60.9314  | 11.55153 | 0.99736 | 240 | 61.03812 | 15.03245 | 0.9973  |
| 241 | 60.82478 | 7.2269   | 0.99816 | 241 | 61.07373 | 10.629   | 0.9965  | 241 | 64.34757 | 19.56895 | 0.99663 | 241 | 61.12101 | 11.54826 | 0.99728 | 241 | 61.23864 | 14.36849 | 0.99724 |
| 242 | 61.02149 | 6.61789  | 0.99821 | 242 | 61.29331 | 10.73477 | 0.99638 | 242 | 64.51461 | 19.84157 | 0.99648 | 242 | 61.30255 | 11.57611 | 0.99732 | 242 | 61.39177 | 13.72138 | 0.99717 |
| 243 | 61.17326 | 6.0474   | 0.99818 | 243 | 61.46697 | 10.88238 | 0.99634 | 243 | 64.69577 | 20.11284 | 0.9965  | 243 | 61.45364 | 11.64655 | 0.99734 | 243 | 61.55502 | 13.10049 | 0.99721 |
| 244 | 61.33086 | 5.5074   | 0.99821 | 244 | 61.66193 | 11.07734 | 0.99645 | 244 | 64.89121 | 20.37114 | 0.9966  | 244 | 61.64783 | 11.73534 | 0.99731 | 244 | 61.68295 | 12.50297 | 0.99726 |
| 245 | 61.5019  | 5.01139  | 0.99812 | 245 | 61.81322 | 11.30916 | 0.99647 | 245 | 65.07791 | 20.63135 | 0.99659 | 245 | 61.85252 | 11.8662  | 0.99719 | 245 | 61.89485 | 11.92796 | 0.99719 |
| 246 | 61.7026  | 4.56076  | 0.99819 | 246 | 62.02735 | 11.56771 | 0.99638 | 246 | 65.2362  | 20.88051 | 0.99641 | 246 | 62.01791 | 12.02254 | 0.99721 | 246 | 62.05478 | 11.39678 | 0.99715 |
| 247 | 61.85836 | 4.17351  | 0.99822 | 247 | 62.21444 | 11.86029 | 0.99634 | 247 | 65.41473 | 21.12468 | 0.99636 | 247 | 62.19225 | 12.21305 | 0.99728 | 247 | 62.22504 | 10.90043 | 0.99719 |
| 248 | 62.02599 | 3.83503  | 0.99816 | 248 | 62.40346 | 12.17887 | 0.99641 | 248 | 65.61737 | 21.35572 | 0.99649 | 248 | 62.37622 | 12.41895 | 0.99727 | 248 | 62.3627  | 10.45273 | 0.99722 |
| 249 | 62.2083  | 3.55847  | 0.99814 | 249 | 62.55212 | 12.52149 | 0.99649 | 249 | 65.80893 | 21.59264 | 0.99648 | 249 | 62.58549 | 12.65549 | 0.99713 | 249 | 62.57352 | 10.03518 | 0.99715 |
| 250 | 62.40298 | 3.3404   | 0.9982  | 250 | 62.76907 | 12.86995 | 0.99637 | 250 | 65.94991 | 21.81494 | 0.99633 | 250 | 62.75516 | 12.90773 | 0.9971  | 250 | 62.73651 | 9.67476  | 0.99709 |
| 251 | 62.58384 | 3.19376  | 0.99822 | 251 | 62.95674 | 13.24103 | 0.99628 | 251 | 66.13923 | 22.03741 | 0.99629 | 251 | 62.92522 | 13.1884  | 0.99717 | 251 | 62.91929 | 9.35541  | 0.9971  |
| 252 | 62.74621 | 3.09873  | 0.99813 | 252 | 63.14451 | 13.61655 | 0.99635 | 252 | 66.32825 | 22.24487 | 0.99635 | 252 | 63.10267 | 13.4709  | 0.99716 | 252 | 63.05996 | 9.09281  | 0.99716 |
| 253 | 62.93854 | 3.06589  | 0.99811 | 253 | 63.30027 | 14.00227 | 0.99643 | 253 | 66.52925 | 22.45902 | 0.99641 | 253 | 63.32128 | 13.77479 | 0.99702 | 253 | 63.274   | 8.85944  | 0.99709 |
| 254 | 63.14246 | 3.08787  | 0.99814 | 254 | 63.50321 | 14.38686 | 0.99636 | 254 | 66.7529  | 22.68882 | 0.99626 | 254 | 63.48005 | 14.08647 | 0.99695 | 254 | 63.45281 | 8.68883  | 0.99701 |
| 255 | 63.33442 | 3.17489  | 0.99817 | 255 | 63.69214 | 14.77912 | 0.99624 | 255 | 66.8574  | 22.86246 | 0.99618 | 255 | 63.6614  | 14.41174 | 0.99706 | 255 | 63.62594 | 8.55714  | 0.997   |
| 256 | 63.49455 | 3.30685  | 0.99809 | 256 | 63.87796 | 15.16374 | 0.99629 | 256 | 67.03748 | 23.04836 | 0.99627 | 256 | 63.85273 | 14.7327  | 0.99707 | 256 | 63.78622 | 8.47734  | 0.99706 |
| 257 | 63.6902  | 3.49115  | 0.99803 | 257 | 64.03372 | 15.55545 | 0.99639 | 257 | 67.25259 | 23.23769 | 0.99636 | 257 | 64.05123 | 15.06569 | 0.99698 | 257 | 63.99208 | 8.4309   | 0.99703 |
| 258 | 63.88905 | 3.72022  | 0.99806 | 258 | 64.22897 | 15.92987 | 0.99636 | 258 | 67.38733 | 23.425   | 0.99625 | 258 | 64.2103  | 15.39783 | 0.99698 | 258 | 64.18432 | 8.43816  | 0.99694 |
| 259 | 64.09005 | 3.9997   | 0.99811 | 259 | 64.43415 | 16.31141 | 0.99626 | 259 | 67.57704 | 23.60265 | 0.99618 | 259 | 64.39777 | 15.73564 | 0.9971  | 259 | 64.35973 | 8.48361  | 0.99693 |
| 260 | 64.25155 | 4.31136  | 0.99803 | 260 | 64.60568 | 16.68138 | 0.99628 | 260 | 67.75917 | 23.77293 | 0.99627 | 260 | 64.55684 | 16.06245 | 0.9972  | 260 | 64.526   | 8.57919  | 0.99701 |
| 261 | 64.44739 | 4.64646  | 0.99793 | 261 | 64.77671 | 17.05246 | 0.99642 | 261 | 67.96267 | 23.94514 | 0.99639 | 261 | 64.78644 | 16.39388 | 0.99712 | 261 | 64.7234  | 8.70023  | 0.997   |
| 262 | 64.64041 | 5.04421  | 0.99796 | 262 | 64.96048 | 17.40495 | 0.99641 | 262 | 68.10785 | 24.11084 | 0.99628 | 262 | 64.93928 | 16.72067 | 0.99705 | 262 | 64.92516 | 8.87149  | 0.99696 |
| 263 | 64.84802 | 5.46031  | 0.99799 | 263 | 65.16411 | 17.76033 | 0.99631 | 263 | 68.30029 | 24.26917 | 0.99617 | 263 | 65.12208 | 17.04639 | 0.99713 | 263 | 65.09581 | 9.0717   | 0.99693 |
| 264 | 64.99414 | 5.89471  | 0.99795 | 264 | 65.33806 | 18.10463 | 0.9963  | 264 | 68.46538 | 24.42495 | 0.99626 | 264 | 65.2866  | 17.36087 | 0.99725 | 264 | 65.27385 | 9.31552  | 0.99701 |
| 265 | 65.20293 | 6.34382  | 0.99788 | 265 | 65.51192 | 18.44782 | 0.99638 | 265 | 68.67533 | 24.57233 | 0.99638 | 265 | 65.51435 | 17.67651 | 0.99719 | 265 | 65.4621  | 9.57452  | 0.99702 |
| 266 | 65.39819 | 6.80805  | 0.9979  | 266 | 65.68391 | 18.77145 | 0.9964  | 266 | 68.82398 | 24.72665 | 0.99631 | 266 | 65.66213 | 17.98486 | 0.9971  | 266 | 65.64869 | 9.87175  | 0.99695 |
| 267 | 65.60803 | 7.28787  | 0.99797 | 267 | 65.8996  | 19.09617 | 0.99628 | 267 | 68.9959  | 24.8678  | 0.99616 | 267 | 65.85748 | 18.2892  | 0.99715 | 267 | 65.84162 | 10.18755 | 0.99691 |
| 268 | 65.75883 | 7.774    | 0.99794 | 268 | 66.06937 | 19.40844 | 0.99624 | 268 | 69.17355 | 25.00675 | 0.99619 | 268 | 66.00633 | 18.58598 | 0.99725 | 268 | 66.02822 | 10.53095 | 0.99696 |
| 269 | 65.96178 | 8.2607   | 0.9979  | 269 | 66.2372  | 19.7094  | 0.99632 | 269 | 69.38223 | 25.13702 | 0.99631 | 269 | 66.23573 | 18.87533 | 0.99716 | 269 | 66.20713 | 10.8804  | 0.99699 |
| 270 | 66.14759 | 8.74876  | 0.99791 | 270 | 66.40628 | 20.0136  | 0.99634 | 270 | 69.53263 | 25.27052 | 0.99627 | 270 | 66.3915  | 19.16173 | 0.99702 | 270 | 66.42778 | 11.25042 | 0.99693 |
| 271 | 66.35783 | 9.23704  | 0.99798 | 271 | 66.63121 | 20.30711 | 0.99622 | 271 | 69.70396 | 25.4001  | 0.99609 | 271 | 66.57887 | 19.43876 | 0.99698 | 271 | 66.58918 | 11.62743 | 0.99686 |
| 272 | 66.50687 | 9.72695  | 0.99794 | 272 | 66.78657 | 20.59055 | 0.99613 | 272 | 69.88258 | 25.52399 | 0.99605 | 272 | 66.72762 | 19.71048 | 0.997   | 272 | 66.77471 | 12.01728 | 0.99694 |
| 273 | 66.69455 | 10.20441 | 0.9978  |     |          |          |         |     |          |          |         |     |          |          |         |     |          |          |         |

|     |          |          |         |     |          |          |         |     |          |          |         |     |          |          |         |     |          |            |         |
|-----|----------|----------|---------|-----|----------|----------|---------|-----|----------|----------|---------|-----|----------|----------|---------|-----|----------|------------|---------|
| 333 | 77.47911 | 25.65492 | 0.99727 | 333 | 77.60471 | 28.94565 | 0.99538 | 333 | 80.59933 | 28.96417 | 0.99528 | 333 | 77.53837 | 27.73962 | 0.99598 | 333 | 77.73167 | 26.33954   | 0.99642 |
| 334 | 77.63419 | 25.76035 | 0.9973  | 334 | 77.79794 | 28.99453 | 0.99528 | 334 | 80.78535 | 28.9779  | 0.9952  | 334 | 77.71669 | 27.78454 | 0.99605 | 334 | 77.91506 | 26.4349    | 0.99644 |
| 335 | 77.85971 | 25.86164 | 0.99722 | 335 | 77.94814 | 29.04416 | 0.99527 | 335 | 80.96767 | 28.98868 | 0.99529 | 335 | 77.88489 | 27.83488 | 0.99616 | 335 | 78.11314 | 26.52726   | 0.99649 |
| 336 | 78.01332 | 25.96114 | 0.99718 | 336 | 78.15829 | 29.09137 | 0.99535 | 336 | 81.11059 | 29.00555 | 0.99539 | 336 | 78.04572 | 27.87695 | 0.99609 | 336 | 78.25995 | 26.6259    | 0.99648 |
| 337 | 78.19292 | 26.06213 | 0.99725 | 337 | 78.31375 | 29.14451 | 0.99531 | 337 | 81.29173 | 29.00045 | 0.99527 | 337 | 78.2329  | 27.91927 | 0.99603 | 337 | 78.43555 | 26.7131    | 0.9964  |
| 338 | 78.33865 | 26.15861 | 0.9973  | 338 | 78.47739 | 29.18942 | 0.99519 | 338 | 81.483   | 29.0191  | 0.99523 | 338 | 78.41279 | 27.95737 | 0.99607 | 338 | 78.6132  | 26.79826   | 0.99639 |
| 339 | 78.55454 | 26.24795 | 0.99724 | 339 | 78.65717 | 29.23394 | 0.99515 | 339 | 81.65822 | 29.02832 | 0.99528 | 339 | 78.58314 | 28.00311 | 0.99618 | 339 | 78.81216 | 26.87805   | 0.99645 |
| 340 | 78.71292 | 26.33731 | 0.99719 | 340 | 78.84971 | 29.27474 | 0.99526 | 340 | 81.81038 | 29.04129 | 0.99538 | 340 | 78.7279  | 28.04107 | 0.99612 | 340 | 78.97083 | 26.96696   | 0.99644 |
| 341 | 78.89465 | 26.42931 | 0.99727 | 341 | 79.01043 | 29.32251 | 0.99528 | 341 | 81.98569 | 29.04389 | 0.99527 | 341 | 78.92919 | 28.07544 | 0.99603 | 341 | 79.13564 | 27.0454    | 0.99638 |
| 342 | 79.03047 | 26.51512 | 0.99732 | 342 | 79.17232 | 29.36048 | 0.99519 | 342 | 82.17812 | 29.05152 | 0.99515 | 342 | 79.10207 | 28.11042 | 0.99602 | 342 | 79.31056 | 27.1226    | 0.99635 |
| 343 | 79.25336 | 26.59079 | 0.99725 | 343 | 79.34714 | 29.40097 | 0.99518 | 343 | 82.36034 | 29.05655 | 0.99521 | 343 | 79.27583 | 28.15032 | 0.99615 | 343 | 79.51019 | 27.19373   | 0.99642 |
| 344 | 79.40746 | 26.67453 | 0.99721 | 344 | 79.5462  | 29.43451 | 0.99531 | 344 | 82.51221 | 29.06763 | 0.99527 | 344 | 79.42254 | 28.18183 | 0.99611 | 344 | 79.66557 | 27.27524   | 0.99642 |
| 345 | 79.58589 | 26.7511  | 0.99726 | 345 | 79.71587 | 29.47912 | 0.99533 | 345 | 82.67293 | 29.06794 | 0.99519 | 345 | 79.62548 | 28.21388 | 0.99597 | 345 | 79.82609 | 27.34294   | 0.99635 |
| 346 | 79.73007 | 26.83114 | 0.99733 | 346 | 79.86597 | 29.51112 | 0.99521 | 346 | 82.87977 | 29.07118 | 0.99505 | 346 | 79.79496 | 28.24286 | 0.99593 | 346 | 80.01298 | 27.41026   | 0.99633 |
| 347 | 79.94274 | 26.89723 | 0.99731 | 347 | 80.04898 | 29.54691 | 0.99512 | 347 | 83.05196 | 29.07324 | 0.99507 | 347 | 79.97368 | 28.27689 | 0.99601 | 347 | 80.20094 | 27.4749    | 0.99636 |
| 348 | 80.10404 | 26.97079 | 0.99725 | 348 | 80.24551 | 29.57678 | 0.99522 | 348 | 83.21249 | 29.07866 | 0.9952  | 348 | 80.11086 | 28.31019 | 0.99603 | 348 | 80.36788 | 27.54401   | 0.9964  |
| 349 | 80.28587 | 27.03713 | 0.99724 | 349 | 80.41478 | 29.61389 | 0.99527 | 349 | 83.37331 | 29.07686 | 0.99512 | 349 | 80.31409 | 28.33776 | 0.99591 | 349 | 80.52628 | 27.6042    | 0.99629 |
| 350 | 80.42636 | 27.11224 | 0.99729 | 350 | 80.56529 | 29.64245 | 0.99515 | 350 | 83.57829 | 29.07622 | 0.99501 | 350 | 80.48347 | 28.36121 | 0.99588 | 350 | 80.71258 | 27.66423   | 0.99622 |
| 351 | 80.63514 | 27.16696 | 0.99725 | 351 | 80.74945 | 29.67138 | 0.99503 | 351 | 83.74612 | 29.07459 | 0.99503 | 351 | 80.66267 | 28.3889  | 0.99598 | 351 | 80.90083 | 27.7202    | 0.99628 |
| 352 | 80.80919 | 27.23372 | 0.99717 | 352 | 80.93381 | 29.69739 | 0.99514 | 352 | 83.9189  | 29.07733 | 0.99516 | 352 | 80.80306 | 28.41732 | 0.99603 | 352 | 81.07858 | 27.7841    | 0.99633 |
| 353 | 80.97341 | 27.29397 | 0.99714 | 353 | 81.11642 | 29.73035 | 0.99524 | 353 | 84.06142 | 29.07635 | 0.99515 | 353 | 81.00746 | 28.43486 | 0.99593 | 353 | 81.21858 | 27.83836   | 0.99627 |
| 354 | 81.13053 | 27.35817 | 0.99718 | 354 | 81.25739 | 29.75691 | 0.99512 | 354 | 84.23731 | 29.07192 | 0.995   | 354 | 81.17207 | 28.46049 | 0.99587 | 354 | 81.41247 | 27.88853   | 0.9962  |
| 355 | 81.329   | 27.40884 | 0.99715 | 355 | 81.44214 | 29.77925 | 0.99503 | 355 | 84.44688 | 29.06746 | 0.99499 | 355 | 81.35429 | 28.48049 | 0.99592 | 355 | 81.59469 | 27.93828   | 0.99622 |
| 356 | 81.50508 | 27.4677  | 0.99707 | 356 | 81.62796 | 29.79812 | 0.99505 | 356 | 84.61305 | 29.07237 | 0.99512 | 356 | 81.50041 | 28.5072  | 0.99597 | 356 | 81.77282 | 27.99341   | 0.99625 |
| 357 | 81.6696  | 27.51961 | 0.99702 | 357 | 81.81514 | 29.8281  | 0.99513 | 357 | 84.76093 | 29.06749 | 0.99511 | 357 | 81.69178 | 28.5193  | 0.99588 | 357 | 81.91856 | 28.0409    | 0.99618 |
| 358 | 81.82886 | 27.57448 | 0.9971  | 358 | 81.95144 | 29.84724 | 0.99506 | 358 | 84.97457 | 29.06226 | 0.9949  | 358 | 81.87362 | 28.54206 | 0.99579 | 358 | 82.11362 | 28.08674   | 0.99612 |
| 359 | 82.01556 | 27.61857 | 0.99709 | 359 | 82.14739 | 29.86643 | 0.99494 | 359 | 85.13451 | 29.05778 | 0.99485 | 359 | 82.04601 | 28.5584  | 0.99583 | 359 | 82.25833 | 28.12885   | 0.99609 |
| 360 | 82.20361 | 27.67121 | 0.99701 | 360 | 82.3224  | 29.88267 | 0.99493 | 360 | 85.3144  | 29.05611 | 0.99495 | 360 | 82.19019 | 28.58062 | 0.99594 | 360 | 82.4736  | 28.17678   | 0.99613 |
| 361 | 82.36103 | 27.71555 | 0.99696 | 361 | 82.51572 | 29.90333 | 0.99501 | 361 | 85.46306 | 29.05302 | 0.99501 | 361 | 82.38204 | 28.589   | 0.99584 | 361 | 82.6132  | 28.22007   | 0.9961  |
| 362 | 82.52729 | 27.76676 | 0.99702 | 362 | 82.65552 | 29.92225 | 0.99497 | 362 | 85.66512 | 29.04576 | 0.99486 | 362 | 82.56951 | 28.60807 | 0.99573 | 362 | 82.80661 | 28.2558    | 0.99604 |
| 363 | 82.71088 | 27.8     | 0.99705 | 363 | 82.84027 | 29.93226 | 0.99488 | 363 | 85.83576 | 29.04374 | 0.99478 | 363 | 82.73734 | 28.62018 | 0.99575 | 363 | 82.99097 | 28.29386   | 0.99603 |
| 364 | 82.90555 | 27.84737 | 0.99699 | 364 | 83.02366 | 29.94954 | 0.9949  | 364 | 86.01896 | 29.03987 | 0.99491 | 364 | 82.8927  | 28.63851 | 0.99582 | 364 | 83.17454 | 28.33445   | 0.99609 |
| 365 | 83.05615 | 27.88599 | 0.99692 | 365 | 83.21842 | 29.9664  | 0.995   | 365 | 86.1535  | 29.03894 | 0.99497 | 365 | 83.07376 | 28.64531 | 0.99573 | 365 | 83.31153 | 28.37344   | 0.9961  |
| 366 | 83.23225 | 27.93079 | 0.99698 | 366 | 83.34645 | 29.98386 | 0.99503 | 366 | 86.36511 | 29.02759 | 0.99485 | 366 | 83.26357 | 28.65891 | 0.99562 | 366 | 83.51233 | 28.39956   | 0.99605 |
| 367 | 83.39909 | 27.96424 | 0.99701 | 367 | 83.53822 | 29.99366 | 0.9949  | 367 | 86.54121 | 29.02655 | 0.99478 | 367 | 83.4344  | 28.66724 | 0.99561 | 367 | 83.69086 | 28.43656   | 0.99603 |
| 368 | 83.60232 | 28.00201 | 0.99691 | 368 | 83.72024 | 30.00859 | 0.99487 | 368 | 86.7168  | 29.02025 | 0.99487 | 368 | 83.58413 | 28.68575 | 0.99571 | 368 | 83.87142 | 28.46881   | 0.99612 |
| 369 | 83.7506  | 28.0358  | 0.99686 | 369 | 83.90839 | 30.01886 | 0.99494 | 369 | 86.85875 | 29.02104 | 0.99496 | 369 | 83.75993 | 28.68821 | 0.9957  | 369 | 84.01643 | 28.50455   | 0.99616 |
| 370 | 83.92318 | 28.07439 | 0.99692 | 370 | 84.05199 | 30.03483 | 0.99497 | 370 | 87.06373 | 29.0077  | 0.99488 | 370 | 83.96442 | 28.70153 | 0.99559 | 370 | 84.19831 | 28.52762   | 0.99611 |
| 371 | 84.09119 | 28.09669 | 0.99697 | 371 | 84.23304 | 30.04111 | 0.99484 | 371 | 87.23807 | 29.00509 | 0.99477 | 371 | 84.11883 | 28.70863 | 0.99561 | 371 | 84.38676 | 28.5588    | 0.99607 |
| 372 | 84.30329 | 28.13289 | 0.9969  | 372 | 84.41789 | 30.04662 | 0.99481 | 372 | 87.41563 | 29.00967 | 0.99483 | 372 | 84.28354 | 28.72248 | 0.99571 | 372 | 84.56712 | 28.58539   | 0.99614 |
| 373 | 84.44075 | 28.1624  | 0.99684 | 373 | 84.60945 | 30.0553  | 0.99488 | 373 | 87.57078 | 29.00985 | 0.99496 | 373 | 84.457   | 28.72229 | 0.99575 | 373 | 84.71151 | 28.61679   | 0.99614 |
| 374 | 84.62589 | 28.19346 | 0.99689 | 374 | 84.75918 | 30.06683 | 0.99496 | 374 | 87.75555 | 29.00942 | 0.99484 | 374 | 84.65449 | 28.73284 | 0.99564 | 374 | 84.89412 | 28.63508   | 0.99603 |
| 375 | 84.78574 | 28.21703 | 0.99698 | 375 | 84.92953 | 30.06854 | 0.99487 | 375 | 87.94205 | 29.00730 | 0.9947  | 375 | 84.81162 | 28.73653 | 0.9956  | 375 | 85.09132 | 28.66804   | 0.99596 |
| 376 | 84.99783 | 28.24678 | 0.99694 | 376 | 85.12479 | 30.07279 | 0.9948  | 376 | 88.10783 | 29.00915 | 0.99472 | 376 | 84.98041 | 28.74806 | 0.99573 | 376 | 85.26381 | 28.68188   | 0.996   |
| 377 | 85.14366 | 28.27296 | 0.99688 | 377 | 85.30594 | 30.07723 | 0.99488 | 377 | 88.263   | 29.00673 | 0.99485 | 377 | 85.14006 | 28.74682 | 0.99578 | 377 | 85.41898 | 28.70922   | 0.99605 |
| 378 | 85.3285  | 28.30157 | 0.99691 | 378 | 85.45897 | 30.08564 | 0.99496 | 378 | 88.44045 | 29.00476 | 0.99474 | 378 | 85.35759 | 28.75506 | 0.99566 | 378 | 85.59634 | 28.72512   | 0.99599 |
| 379 | 85.47794 | 28.32163 | 0.997   | 379 | 85.63058 | 30.08667 | 0.99483 | 379 | 88.63444 | 29.00429 | 0.99462 | 379 | 85.50596 | 28.75726 | 0.9956  | 379 | 85.78444 | 28.74665   | 0.9959  |
| 380 | 85.7018  | 28.34642 | 0.99699 | 380 | 85.82661 | 30.08822 | 0.99474 | 380 | 88.79575 | 29.00301 | 0.99465 | 380 | 85.67971 | 28.76326 | 0.99565 | 380 | 85.96175 | 28.76442   | 0.99595 |
| 381 | 85.84102 | 28.37014 | 0.99693 | 381 | 85.99804 | 30.0894  | 0.99476 | 381 | 88.95773 | 29.00257 | 0.99481 | 381 | 85.83956 | 28.7604  | 0.99574 | 381 | 86.11955 | 28.78769   | 0.99601 |
| 382 | 86.02402 | 28.39147 | 0.99693 | 382 | 86.16635 | 30.09798 | 0.99487 | 382 | 89.11787 | 29.00768 | 0.9948  | 382 | 86.05651 | 28.76435 | 0.99566 | 382 | 86.28572 | 28.79942   | 0.99592 |
| 383 | 86.17121 | 28.40941 | 0.99702 | 383 | 86.3224  | 30.09792 | 0.9948  | 383 | 89.32792 | 29.00776 | 0.99466 | 383 | 86.19943 | 28.76584 | 0.99554 | 383 | 86.48935 | 28.81638   | 0.99582 |
| 384 | 86.39177 | 28.42739 | 0.99703 | 384 | 86.53304 | 30.09632 | 0.99471 | 384 | 89.48095 | 28.8848  | 0.99465 | 384 | 86.37834 | 28.77011 | 0.99559 | 384 | 86.65989 | 28.83133   | 0.99585 |
| 385 | 86.53876 | 28.45009 | 0.99697 | 385 | 86.70766 | 30.09577 | 0.9947  | 385 | 89.64634 | 28.87546 | 0.99481 | 385 | 86.52923 | 28.76667 | 0.99566 | 385 | 86.81828 | 28.85186</ |         |

|     |          |          |         |     |          |          |         |     |          |          |         |     |          |          |         |     |          |          |         |
|-----|----------|----------|---------|-----|----------|----------|---------|-----|----------|----------|---------|-----|----------|----------|---------|-----|----------|----------|---------|
| 446 | 97.07555 | 28.37714 | 0.99668 | 446 | 97.29172 | 29.42827 | 0.99376 | 446 | 100.2019 | 27.71915 | 0.99381 | 446 | 97.07379 | 28.06648 | 0.99484 | 446 | 97.37947 | 28.56828 | 0.99535 |
| 447 | 97.22945 | 28.36451 | 0.99661 | 447 | 97.47277 | 29.40586 | 0.99377 | 447 | 100.3616 | 27.69874 | 0.99399 | 447 | 97.26506 | 28.04596 | 0.99494 | 447 | 97.53756 | 28.55301 | 0.99544 |
| 448 | 97.41245 | 28.35213 | 0.99659 | 448 | 97.62124 | 29.3893  | 0.99381 | 448 | 100.5612 | 27.67141 | 0.99396 | 448 | 97.40652 | 28.03411 | 0.99496 | 448 | 97.74683 | 28.53458 | 0.99547 |
| 449 | 97.60528 | 28.33918 | 0.99666 | 449 | 97.8345  | 29.36548 | 0.99382 | 449 | 100.7296 | 27.65591 | 0.99381 | 449 | 97.57307 | 28.01453 | 0.99482 | 449 | 97.89917 | 28.52358 | 0.99539 |
| 450 | 97.76571 | 28.335   | 0.99671 | 450 | 97.98674 | 29.351   | 0.99373 | 450 | 100.8916 | 27.6295  | 0.99373 | 450 | 97.76289 | 27.99566 | 0.99479 | 450 | 98.06934 | 28.50529 | 0.99538 |
| 451 | 97.9167  | 28.31928 | 0.99663 | 451 | 98.15836 | 29.33132 | 0.99369 | 451 | 101.0504 | 27.61129 | 0.99383 | 451 | 97.93674 | 27.97732 | 0.99486 | 451 | 98.22082 | 28.49056 | 0.99546 |
| 452 | 98.10378 | 28.30784 | 0.99658 | 452 | 98.30157 | 29.31401 | 0.99377 | 452 | 101.2524 | 27.58275 | 0.99392 | 452 | 98.09045 | 27.96288 | 0.99488 | 452 | 98.3184  | 28.47084 | 0.99551 |
| 453 | 98.28075 | 28.29415 | 0.99664 | 453 | 98.51492 | 29.28882 | 0.99382 | 453 | 101.4245 | 27.56715 | 0.99381 | 453 | 98.25662 | 27.94405 | 0.99479 | 453 | 98.57787 | 28.46045 | 0.99545 |
| 454 | 98.45714 | 28.28702 | 0.99669 | 454 | 98.67545 | 29.27638 | 0.99373 | 454 | 101.5748 | 27.54337 | 0.99373 | 454 | 98.44662 | 27.92337 | 0.99473 | 454 | 98.74851 | 28.44034 | 0.9954  |
| 455 | 98.60111 | 28.27502 | 0.99663 | 455 | 98.83451 | 29.25235 | 0.99364 | 455 | 101.7427 | 27.52369 | 0.99379 | 455 | 98.62223 | 27.90399 | 0.99472 | 455 | 98.90408 | 28.42536 | 0.99545 |
| 456 | 98.78431 | 28.26173 | 0.99655 | 456 | 98.99932 | 29.23472 | 0.99368 | 456 | 101.9373 | 27.49397 | 0.99388 | 456 | 98.78236 | 27.8915  | 0.99482 | 456 | 99.10799 | 28.40477 | 0.99551 |
| 457 | 98.96751 | 28.2466  | 0.9966  | 457 | 99.20606 | 29.20992 | 0.99376 | 457 | 102.1137 | 27.47675 | 0.99377 | 457 | 98.93141 | 27.87092 | 0.99473 | 457 | 99.26453 | 28.39248 | 0.99542 |
| 458 | 99.14768 | 28.23989 | 0.99665 | 458 | 99.36813 | 29.19582 | 0.99367 | 458 | 102.2621 | 27.44972 | 0.99362 | 458 | 99.13299 | 27.84927 | 0.99467 | 458 | 99.4341  | 28.36926 | 0.99534 |
| 459 | 99.28233 | 28.22534 | 0.99661 | 459 | 99.52837 | 29.16968 | 0.99357 | 459 | 102.4417 | 27.43123 | 0.99368 | 459 | 99.30538 | 27.82901 | 0.99472 | 459 | 99.59491 | 28.35478 | 0.99537 |
| 460 | 99.47214 | 28.21151 | 0.99654 | 460 | 99.68568 | 29.15465 | 0.99357 | 460 | 102.6142 | 27.40104 | 0.99374 | 460 | 99.46066 | 27.81547 | 0.99477 | 460 | 99.79277 | 28.33292 | 0.99543 |
| 461 | 99.6492  | 28.19725 | 0.99654 | 461 | 99.88678 | 29.12694 | 0.99361 | 461 | 102.8111 | 27.38129 | 0.9937  | 461 | 99.61593 | 27.79518 | 0.99476 | 461 | 99.95779 | 28.32025 | 0.99538 |
| 462 | 99.8299  | 28.18757 | 0.99661 | 462 | 100.0598 | 29.11328 | 0.99358 | 462 | 102.9531 | 27.35617 | 0.99359 | 462 | 99.8177  | 27.77393 | 0.9947  | 462 | 100.1211 | 28.29944 | 0.99529 |
| 463 | 99.96675 | 28.17319 | 0.99657 | 463 | 100.207  | 29.09086 | 0.99346 | 463 | 103.1277 | 27.33618 | 0.99358 | 463 | 99.98251 | 27.75211 | 0.99469 | 463 | 100.2839 | 28.28045 | 0.99531 |
| 464 | 100.1542 | 28.15752 | 0.99648 | 464 | 100.3754 | 29.07194 | 0.99345 | 464 | 103.3066 | 27.30815 | 0.9937  | 464 | 100.1515 | 27.73448 | 0.99479 | 464 | 100.4886 | 28.25626 | 0.99536 |
| 465 | 100.3318 | 28.1421  | 0.99648 | 465 | 100.5688 | 29.0462  | 0.99353 | 465 | 103.5072 | 27.28271 | 0.99366 | 465 | 100.296  | 27.71579 | 0.99478 | 465 | 100.6449 | 28.24551 | 0.99536 |
| 466 | 100.5194 | 28.12639 | 0.99655 | 466 | 100.7431 | 29.03212 | 0.99352 | 466 | 103.6403 | 27.26338 | 0.99351 | 466 | 100.5014 | 27.69207 | 0.99466 | 466 | 100.8021 | 28.22908 | 0.99527 |
| 467 | 100.6485 | 28.11556 | 0.99652 | 467 | 100.892  | 29.01004 | 0.9934  | 467 | 103.8259 | 27.24348 | 0.9935  | 467 | 100.667  | 27.66885 | 0.99466 | 467 | 100.977  | 28.20206 | 0.99527 |
| 468 | 100.8341 | 28.0914  | 0.99646 | 468 | 101.0691 | 28.992   | 0.99342 | 468 | 103.9926 | 27.214   | 0.9936  | 468 | 100.8341 | 27.6526  | 0.99473 | 468 | 101.1648 | 28.1782  | 0.99532 |
| 469 | 101.0171 | 28.07688 | 0.99644 | 469 | 101.2559 | 28.96435 | 0.99352 | 469 | 104.1972 | 27.19272 | 0.99362 | 469 | 100.9761 | 27.63205 | 0.99475 | 469 | 101.3391 | 28.16572 | 0.99534 |
| 470 | 101.1961 | 28.05882 | 0.99649 | 470 | 101.441  | 28.95007 | 0.99357 | 470 | 104.3344 | 27.17    | 0.99351 | 470 | 101.1833 | 27.60834 | 0.99464 | 470 | 101.487  | 28.14366 | 0.99527 |
| 471 | 101.3367 | 28.04442 | 0.99652 | 471 | 101.5841 | 28.92778 | 0.99348 | 471 | 104.5183 | 27.15044 | 0.99343 | 471 | 101.3458 | 27.58675 | 0.99457 | 471 | 101.6588 | 28.12306 | 0.99524 |
| 472 | 101.5193 | 28.02086 | 0.99644 | 472 | 101.758  | 28.91029 | 0.99344 | 472 | 104.6776 | 27.12129 | 0.99352 | 472 | 101.5185 | 27.56921 | 0.99467 | 472 | 101.8526 | 28.09797 | 0.99532 |
| 473 | 101.6964 | 28.00661 | 0.9964  | 473 | 101.9394 | 28.88432 | 0.99357 | 473 | 104.8492 | 27.0983  | 0.99361 | 473 | 101.6603 | 27.5498  | 0.99477 | 473 | 102.0354 | 28.08369 | 0.99535 |
| 474 | 101.8836 | 27.98461 | 0.99647 | 474 | 102.1311 | 28.86788 | 0.99363 | 474 | 105.0257 | 27.08026 | 0.99351 | 474 | 101.8654 | 27.52298 | 0.99466 | 474 | 102.1741 | 28.06022 | 0.99529 |
| 475 | 102.0282 | 27.97203 | 0.99652 | 475 | 102.2658 | 28.84542 | 0.9935  | 475 | 105.2086 | 27.0543  | 0.99343 | 475 | 102.0299 | 27.50212 | 0.99462 | 475 | 102.3571 | 28.04069 | 0.99526 |
| 476 | 102.1969 | 27.94886 | 0.99646 | 476 | 102.4495 | 28.82671 | 0.99341 | 476 | 105.3745 | 27.02929 | 0.99349 | 476 | 102.2052 | 27.48321 | 0.99475 | 476 | 102.539  | 28.01629 | 0.99534 |
| 477 | 102.3867 | 27.92954 | 0.99639 | 477 | 102.6288 | 28.80055 | 0.99349 | 477 | 105.5799 | 27.00419 | 0.99357 | 477 | 102.3408 | 27.4617  | 0.99483 | 477 | 102.7221 | 27.9988  | 0.99537 |
| 478 | 102.5657 | 27.90977 | 0.99643 | 478 | 102.8205 | 28.78131 | 0.99357 | 478 | 105.7206 | 26.98687 | 0.99347 | 478 | 102.5549 | 27.43282 | 0.99476 | 478 | 102.8657 | 27.97625 | 0.99528 |
| 479 | 102.7099 | 27.89584 | 0.9965  | 479 | 102.9553 | 28.76042 | 0.99344 | 479 | 105.9032 | 26.95951 | 0.99335 | 479 | 102.7138 | 27.41119 | 0.9947  | 479 | 103.0502 | 27.95766 | 0.99522 |
| 480 | 102.8785 | 27.87196 | 0.99644 | 480 | 103.1392 | 28.74103 | 0.99335 | 480 | 106.0857 | 26.93875 | 0.99345 | 480 | 102.8852 | 27.38691 | 0.9948  | 480 | 103.2256 | 27.93275 | 0.99527 |
| 481 | 103.0758 | 27.85181 | 0.99637 | 481 | 103.3142 | 28.7137  | 0.9934  | 481 | 106.2679 | 26.91253 | 0.99354 | 481 | 103.03   | 27.36802 | 0.99493 | 481 | 103.4188 | 27.91402 | 0.99531 |
| 482 | 103.2458 | 27.83031 | 0.99642 | 482 | 103.5231 | 28.69355 | 0.99353 | 482 | 106.4196 | 26.89518 | 0.99346 | 482 | 103.2321 | 27.33781 | 0.99487 | 482 | 103.5495 | 27.894   | 0.99524 |
| 483 | 103.4024 | 27.81622 | 0.99648 | 483 | 103.648  | 28.67397 | 0.99347 | 483 | 106.5903 | 26.86746 | 0.99335 | 483 | 103.3991 | 27.31776 | 0.99478 | 483 | 103.7359 | 27.87143 | 0.99518 |
| 484 | 103.5634 | 27.79237 | 0.99643 | 484 | 103.8351 | 28.64959 | 0.99338 | 484 | 106.7555 | 26.84506 | 0.99337 | 484 | 103.5765 | 27.29114 | 0.99483 | 484 | 103.9216 | 27.8446  | 0.99521 |
| 485 | 103.7614 | 27.77112 | 0.99637 | 485 | 104.0098 | 28.62523 | 0.9934  | 485 | 106.9576 | 26.81911 | 0.9935  | 485 | 103.7182 | 27.27716 | 0.9949  | 485 | 104.1111 | 27.82641 | 0.99529 |
| 486 | 103.9332 | 27.74918 | 0.99638 | 486 | 104.2059 | 28.60214 | 0.9935  | 486 | 107.1105 | 26.80006 | 0.99346 | 486 | 103.918  | 27.24438 | 0.99481 | 486 | 104.2485 | 27.80254 | 0.99524 |
| 487 | 104.0926 | 27.73454 | 0.99646 | 487 | 104.3401 | 28.58381 | 0.99347 | 487 | 107.278  | 26.77225 | 0.99324 | 487 | 104.095  | 27.22512 | 0.99467 | 487 | 104.437  | 27.7792  | 0.99517 |
| 488 | 104.246  | 27.71221 | 0.99641 | 488 | 104.5205 | 28.55871 | 0.99334 | 488 | 107.4501 | 26.74794 | 0.99326 | 488 | 104.2549 | 27.20103 | 0.99466 | 488 | 104.6066 | 27.75532 | 0.99517 |
| 489 | 104.4542 | 27.68921 | 0.99633 | 489 | 104.692  | 28.53455 | 0.99339 | 489 | 107.6417 | 26.72102 | 0.99336 | 489 | 104.41   | 27.18209 | 0.99476 | 489 | 104.8024 | 27.73307 | 0.99522 |
| 490 | 104.6187 | 27.66671 | 0.99634 | 490 | 104.8938 | 28.50886 | 0.9935  | 490 | 107.8047 | 26.70251 | 0.99335 | 490 | 104.6083 | 27.15154 | 0.99473 | 490 | 104.9418 | 27.71135 | 0.99516 |
| 491 | 104.7857 | 27.65042 | 0.99642 | 491 | 105.0375 | 28.49242 | 0.99346 | 491 | 107.9606 | 26.67663 | 0.99324 | 491 | 104.7779 | 27.13131 | 0.99464 | 491 | 105.1209 | 27.68632 | 0.99505 |
| 492 | 104.9356 | 27.62666 | 0.99637 | 492 | 105.2079 | 28.46657 | 0.99334 | 492 | 108.1279 | 26.65144 | 0.99316 | 492 | 104.9461 | 27.1054  | 0.99466 | 492 | 105.3053 | 27.66719 | 0.99505 |
| 493 | 105.1355 | 27.60692 | 0.99629 | 493 | 105.3896 | 28.44283 | 0.9933  | 493 | 108.3257 | 26.62228 | 0.99325 | 493 | 105.1053 | 27.08775 | 0.99479 | 493 | 105.4999 | 27.63816 | 0.9951  |
| 494 | 105.3046 | 27.58365 | 0.99628 | 494 | 105.5882 | 28.41828 | 0.99331 | 494 | 108.4909 | 26.60585 | 0.99328 | 494 | 105.2834 | 27.05772 | 0.99483 | 494 | 105.6335 | 27.61928 | 0.9951  |
| 495 | 105.4806 | 27.56711 | 0.99636 | 495 | 105.7364 | 28.40105 | 0.99337 | 495 | 108.6366 | 26.57741 | 0.99317 | 495 | 105.4746 | 27.03788 | 0.99472 | 495 | 105.8142 | 27.59165 | 0.99501 |
| 496 | 105.6196 | 27.54741 | 0.99637 | 496 | 105.9039 | 28.37763 | 0.99323 | 496 | 108.8157 | 26.55254 | 0.99316 | 496 | 105.6284 | 27.01458 | 0.99465 | 496 | 105.9955 | 27.56798 | 0.995   |
| 497 | 105.8304 | 27.52203 | 0.99631 | 497 | 106.0869 | 28.35337 | 0.99316 | 497 | 109.0019 | 26.52352 | 0.99325 | 497 | 105.7892 | 26.99947 | 0.99478 | 497 | 106.186  | 27.54249 | 0.99508 |
| 498 | 105.9976 | 27.50069 | 0.99628 | 498 | 106.274  | 28.32729 | 0.99326 | 498 | 109.1804 | 26.50402 | 0.99331 | 498 | 105.9704 | 26.96981 | 0.99483 | 498 | 106.3357 | 2        |         |

|     |          |          |         |     |          |          |         |     |          |          |         |     |          |          |         |     |          |          |         |
|-----|----------|----------|---------|-----|----------|----------|---------|-----|----------|----------|---------|-----|----------|----------|---------|-----|----------|----------|---------|
| 559 | 116.4369 | 26.09424 | 0.9958  | 559 | 116.7488 | 26.87667 | 0.99247 | 559 | 119.6759 | 25.05257 | 0.99241 | 559 | 116.44   | 25.46924 | 0.99426 | 559 | 116.856  | 26.04516 | 0.99481 |
| 560 | 116.6071 | 26.06891 | 0.99578 | 560 | 116.9246 | 26.85806 | 0.99249 | 560 | 119.8274 | 25.0403  | 0.99251 | 560 | 116.621  | 25.44896 | 0.99436 | 560 | 117.0019 | 26.01583 | 0.99488 |
| 561 | 116.7623 | 26.05057 | 0.99581 | 561 | 117.0657 | 26.84333 | 0.99254 | 561 | 120.0006 | 25.01841 | 0.99243 | 561 | 116.7646 | 25.42347 | 0.99432 | 561 | 117.215  | 25.99139 | 0.99482 |
| 562 | 116.9634 | 26.02136 | 0.99584 | 562 | 117.289  | 26.8099  | 0.99245 | 562 | 120.196  | 25.00285 | 0.99235 | 562 | 116.9524 | 25.39872 | 0.99421 | 562 | 117.3545 | 25.96584 | 0.99473 |
| 563 | 117.133  | 26.00447 | 0.99578 | 563 | 117.4299 | 26.7927  | 0.9923  | 563 | 120.3659 | 24.98641 | 0.99238 | 563 | 117.124  | 25.37664 | 0.9942  | 563 | 117.5275 | 25.94125 | 0.99477 |
| 564 | 117.2878 | 25.97963 | 0.99576 | 564 | 117.6074 | 26.76994 | 0.99232 | 564 | 120.5215 | 24.97428 | 0.99225 | 564 | 117.3101 | 25.35446 | 0.99427 | 564 | 117.6773 | 25.90932 | 0.99482 |
| 565 | 117.4406 | 25.96299 | 0.99581 | 565 | 117.7528 | 26.75096 | 0.9924  | 565 | 120.6869 | 24.95368 | 0.99242 | 565 | 117.4446 | 25.33472 | 0.99427 | 565 | 117.896  | 25.88236 | 0.99478 |
| 566 | 117.6386 | 25.93288 | 0.99586 | 566 | 117.9693 | 26.72528 | 0.99236 | 566 | 120.8863 | 24.93858 | 0.99228 | 566 | 117.6314 | 25.30726 | 0.99415 | 566 | 118.0298 | 25.85506 | 0.99471 |
| 567 | 117.8168 | 25.91785 | 0.99582 | 567 | 118.1186 | 26.7077  | 0.99224 | 567 | 121.0532 | 24.91948 | 0.99227 | 567 | 117.8099 | 25.28678 | 0.99409 | 567 | 118.2073 | 25.83    | 0.99473 |
| 568 | 117.9649 | 25.89185 | 0.99577 | 568 | 118.2973 | 26.68573 | 0.99226 | 568 | 121.2175 | 24.90777 | 0.99224 | 568 | 117.9876 | 25.26496 | 0.99419 | 568 | 118.3524 | 25.79825 | 0.9948  |
| 569 | 118.1353 | 25.87392 | 0.99583 | 569 | 118.4338 | 26.66788 | 0.99237 | 569 | 121.3776 | 24.88803 | 0.99232 | 569 | 118.1306 | 25.24797 | 0.99421 | 569 | 118.5701 | 25.76946 | 0.99479 |
| 570 | 118.3161 | 25.84483 | 0.99589 | 570 | 118.6502 | 26.64002 | 0.99238 | 570 | 121.581  | 24.86665 | 0.99214 | 570 | 118.3171 | 25.22028 | 0.99409 | 570 | 118.7127 | 25.74204 | 0.99469 |
| 571 | 118.498  | 25.8288  | 0.99585 | 571 | 118.8073 | 26.62431 | 0.99229 | 571 | 121.7473 | 24.84888 | 0.99213 | 571 | 118.494  | 25.20128 | 0.99403 | 571 | 118.8901 | 25.71462 | 0.99469 |
| 572 | 118.643  | 25.80371 | 0.99579 | 572 | 118.9731 | 26.59762 | 0.99226 | 572 | 121.9172 | 24.83416 | 0.99226 | 572 | 118.6733 | 25.17902 | 0.9941  | 572 | 119.0316 | 25.68634 | 0.99474 |
| 573 | 118.8103 | 25.78603 | 0.99582 | 573 | 119.1218 | 26.58063 | 0.99236 | 573 | 122.0709 | 24.81398 | 0.99225 | 573 | 118.8194 | 25.16303 | 0.99415 | 573 | 119.2508 | 25.65235 | 0.99471 |
| 574 | 118.9927 | 25.7564  | 0.99587 | 574 | 119.3333 | 26.55152 | 0.99238 | 574 | 122.2823 | 24.79287 | 0.9921  | 574 | 118.9935 | 25.13709 | 0.99403 | 574 | 119.3873 | 25.63166 | 0.99461 |
| 575 | 119.1855 | 25.7369  | 0.99585 | 575 | 119.4905 | 26.53609 | 0.99223 | 575 | 122.4136 | 24.77346 | 0.99202 | 575 | 119.1871 | 25.11714 | 0.99389 | 575 | 119.565  | 25.59745 | 0.99456 |
| 576 | 119.3215 | 25.71419 | 0.99579 | 576 | 119.6541 | 26.51102 | 0.99217 | 576 | 122.6233 | 24.7594  | 0.99215 | 576 | 119.3553 | 25.09724 | 0.99399 | 576 | 119.711  | 25.57184 | 0.9946  |
| 577 | 119.4963 | 25.69517 | 0.99578 | 577 | 119.8116 | 26.49451 | 0.99222 | 577 | 122.7663 | 24.74039 | 0.99217 | 577 | 119.5024 | 25.082   | 0.99401 | 577 | 119.9198 | 25.53693 | 0.99461 |
| 578 | 119.6662 | 25.66592 | 0.99587 | 578 | 120.0142 | 26.4658  | 0.99226 | 578 | 122.9279 | 24.71946 | 0.99196 | 578 | 119.6764 | 25.05405 | 0.99395 | 578 | 120.0697 | 25.51313 | 0.99453 |
| 579 | 119.8625 | 25.6445  | 0.99587 | 579 | 120.1863 | 26.44982 | 0.99217 | 579 | 123.1405 | 24.69985 | 0.99191 | 579 | 119.87   | 25.03662 | 0.99386 | 579 | 120.2447 | 25.48145 | 0.9945  |
| 580 | 120.0056 | 25.62213 | 0.99578 | 580 | 120.3465 | 26.42747 | 0.99211 | 580 | 123.3177 | 24.68682 | 0.99204 | 580 | 120.0339 | 25.0142  | 0.99391 | 580 | 120.3887 | 25.45337 | 0.9946  |
| 581 | 120.1841 | 25.60094 | 0.99576 | 581 | 120.5011 | 26.41106 | 0.99218 | 581 | 123.5011 | 24.66979 | 0.99206 | 581 | 120.1944 | 24.99564 | 0.99404 | 581 | 120.5998 | 25.41893 | 0.99463 |
| 582 | 120.3477 | 25.57138 | 0.99583 | 582 | 120.6953 | 26.3823  | 0.99226 | 582 | 123.6743 | 24.64931 | 0.99195 | 582 | 120.3548 | 24.97187 | 0.99397 | 582 | 120.7554 | 25.39477 | 0.99457 |
| 583 | 120.5498 | 25.55117 | 0.99583 | 583 | 120.8711 | 26.36829 | 0.99222 | 583 | 123.8396 | 24.63178 | 0.99187 | 583 | 120.5573 | 24.95268 | 0.99386 | 583 | 120.9148 | 25.3674  | 0.9945  |
| 584 | 120.6858 | 25.52827 | 0.99575 | 584 | 121.0247 | 26.34467 | 0.9921  | 584 | 124.0158 | 24.61818 | 0.99203 | 584 | 120.721  | 24.93055 | 0.99388 | 584 | 121.0732 | 25.33697 | 0.99455 |
| 585 | 120.8605 | 25.50811 | 0.99574 | 585 | 121.1914 | 26.32922 | 0.99218 | 585 | 124.1602 | 24.60414 | 0.99213 | 585 | 120.8801 | 24.915   | 0.99395 | 585 | 121.2806 | 25.30307 | 0.99459 |
| 586 | 121.026  | 25.47911 | 0.99583 | 586 | 121.3755 | 26.30051 | 0.99226 | 586 | 124.3174 | 24.58374 | 0.99198 | 586 | 121.0408 | 24.8881  | 0.99392 | 586 | 121.4375 | 25.28113 | 0.99445 |
| 587 | 121.2336 | 25.45699 | 0.99584 | 587 | 121.5632 | 26.28485 | 0.9922  | 587 | 124.4568 | 24.56853 | 0.99187 | 587 | 121.2511 | 24.86842 | 0.99375 | 587 | 121.5989 | 25.24884 | 0.99442 |
| 588 | 121.365  | 25.43328 | 0.99578 | 588 | 121.7132 | 26.26203 | 0.9921  | 588 | 124.7154 | 24.55127 | 0.99193 | 588 | 121.404  | 24.84573 | 0.99369 | 588 | 121.7581 | 25.22345 | 0.99445 |
| 589 | 121.5505 | 25.41008 | 0.99574 | 589 | 121.8777 | 26.24447 | 0.99215 | 589 | 124.8585 | 24.54919 | 0.99202 | 589 | 121.573  | 24.82813 | 0.99376 | 589 | 121.9505 | 25.18997 | 0.9945  |
| 590 | 121.704  | 25.38528 | 0.99579 | 590 | 122.0638 | 26.2158  | 0.99225 | 590 | 125.0378 | 24.5164  | 0.99191 | 590 | 121.728  | 24.80105 | 0.99378 | 590 | 122.1213 | 25.16861 | 0.99446 |
| 591 | 121.9126 | 25.35954 | 0.99578 | 591 | 122.2587 | 26.19814 | 0.99219 | 591 | 125.2519 | 24.50167 | 0.9918  | 591 | 121.9312 | 24.78099 | 0.99363 | 591 | 122.2759 | 25.13618 | 0.99438 |
| 592 | 122.0546 | 25.3398  | 0.9957  | 592 | 122.3966 | 26.17535 | 0.9921  | 592 | 125.4072 | 24.48301 | 0.99185 | 592 | 122.0866 | 24.75742 | 0.9936  | 592 | 122.4379 | 25.10999 | 0.99439 |
| 593 | 122.2358 | 25.31347 | 0.99564 | 593 | 122.571  | 26.15803 | 0.99209 | 593 | 125.5547 | 24.46854 | 0.99202 | 593 | 122.2583 | 24.73842 | 0.9937  | 593 | 122.6361 | 25.07365 | 0.99446 |
| 594 | 122.3927 | 25.28994 | 0.99569 | 594 | 122.754  | 26.13084 | 0.99217 | 594 | 125.7501 | 24.4413  | 0.99194 | 594 | 122.4032 | 24.71366 | 0.99377 | 594 | 122.8105 | 25.05242 | 0.99446 |
| 595 | 122.6017 | 25.26381 | 0.99572 | 595 | 122.942  | 26.11125 | 0.99216 | 595 | 125.9231 | 24.4256  | 0.99183 | 595 | 122.6256 | 24.69181 | 0.99366 | 595 | 122.9534 | 25.0203  | 0.99439 |
| 596 | 122.7417 | 25.24594 | 0.99566 | 596 | 123.0843 | 26.09079 | 0.99204 | 596 | 126.1001 | 24.40311 | 0.99182 | 596 | 122.7748 | 24.67267 | 0.99359 | 596 | 123.1291 | 24.99326 | 0.99441 |
| 597 | 122.9187 | 25.21824 | 0.99562 | 597 | 123.2632 | 26.07302 | 0.99203 | 597 | 126.2615 | 24.38793 | 0.99191 | 597 | 122.9468 | 24.65442 | 0.9937  | 597 | 123.3127 | 24.96038 | 0.99445 |
| 598 | 123.0872 | 25.19159 | 0.99565 | 598 | 123.429  | 26.04771 | 0.99211 | 598 | 126.4429 | 24.3598  | 0.99183 | 598 | 123.0971 | 24.63047 | 0.99377 | 598 | 123.4962 | 24.93942 | 0.9945  |
| 599 | 123.2814 | 25.16715 | 0.99572 | 599 | 123.6336 | 26.03052 | 0.99213 | 599 | 126.6305 | 24.34053 | 0.99165 | 599 | 123.3172 | 24.61073 | 0.99368 | 599 | 123.6432 | 24.91002 | 0.99441 |
| 600 | 123.4299 | 25.14683 | 0.9957  | 600 | 123.7704 | 26.00973 | 0.99198 | 600 | 126.796  | 24.31772 | 0.99161 | 600 | 123.4622 | 24.59039 | 0.99359 | 600 | 123.8128 | 24.88601 | 0.99441 |
| 601 | 123.6014 | 25.12015 | 0.99563 | 601 | 123.9502 | 25.99208 | 0.99192 | 601 | 126.9482 | 24.30062 | 0.9917  | 601 | 123.6405 | 24.5711  | 0.99364 | 601 | 123.9933 | 24.85311 | 0.99446 |
| 602 | 123.7632 | 25.09602 | 0.99565 | 602 | 124.1203 | 25.96649 | 0.99202 | 602 | 127.1261 | 24.27038 | 0.99172 | 602 | 123.7849 | 24.55005 | 0.99374 | 602 | 124.1835 | 24.83268 | 0.99447 |
| 603 | 123.9656 | 25.06899 | 0.99572 | 603 | 124.3302 | 25.94852 | 0.99204 | 603 | 127.3236 | 24.25222 | 0.99158 | 603 | 123.9999 | 24.52733 | 0.99365 | 603 | 124.3163 | 24.80682 | 0.99439 |
| 604 | 124.1237 | 25.05062 | 0.99571 | 604 | 124.4634 | 25.93166 | 0.99195 | 604 | 127.477  | 24.22748 | 0.99153 | 604 | 124.1514 | 24.50887 | 0.99356 | 604 | 124.5021 | 24.78223 | 0.99436 |
| 605 | 124.2853 | 25.02264 | 0.99563 | 605 | 124.6489 | 25.91284 | 0.99188 | 605 | 127.6429 | 24.21003 | 0.99157 | 605 | 124.3254 | 24.48918 | 0.99358 | 605 | 124.6859 | 24.75209 | 0.99441 |
| 606 | 124.4585 | 25.00114 | 0.99563 | 606 | 124.81   | 25.89025 | 0.99196 | 606 | 127.8114 | 24.18224 | 0.99175 | 606 | 124.4721 | 24.46928 | 0.99366 | 606 | 124.8732 | 24.73074 | 0.99443 |
| 607 | 124.6506 | 24.97486 | 0.9957  | 607 | 125.0215 | 25.86732 | 0.992   | 607 | 128.0105 | 24.16246 | 0.99164 | 607 | 124.6973 | 24.44363 | 0.99362 | 607 | 125.0129 | 24.70571 | 0.99436 |
| 608 | 124.809  | 24.9571  | 0.99569 | 608 | 125.1577 | 25.8518  | 0.99186 | 608 | 128.1673 | 24.13827 | 0.9916  | 608 | 124.8442 | 24.42952 | 0.99353 | 608 | 125.1923 | 24.68461 | 0.99434 |
| 609 | 124.9748 | 24.93118 | 0.99561 | 609 | 125.3342 | 25.82965 | 0.99174 | 609 | 128.3287 | 24.12073 | 0.99173 | 609 | 125.0178 | 24.40503 | 0.99355 | 609 | 125.3648 | 24.65443 | 0.99437 |
| 610 | 125.1467 | 24.90883 | 0.99559 | 610 | 125.5011 | 25.80535 | 0.99173 | 610 | 128.4972 | 24.0913  | 0.99182 | 610 | 125.1663 | 24.38957 | 0.99365 | 610 | 125.5674 | 24.63398 | 0.99443 |
| 611 | 125.3382 | 24.88145 | 0.99566 | 611 | 125.7113 | 25.78125 | 0.99175 | 611 | 128.7047 | 24.07302 | 0.99171 | 611 | 125.3814 | 24.36156 | 0.99364 | 611 | 125.7004 | 24.61263 |         |

|     |          |          |         |     |          |          |         |     |          |          |         |     |          |          |         |     |          |          |         |
|-----|----------|----------|---------|-----|----------|----------|---------|-----|----------|----------|---------|-----|----------|----------|---------|-----|----------|----------|---------|
| 672 | 135.7744 | 23.39381 | 0.99514 | 672 | 136.1553 | 24.36753 | 0.99009 | 672 | 139.1871 | 22.44643 | 0.99057 | 672 | 135.8534 | 23.03952 | 0.99274 | 672 | 136.2003 | 23.32091 | 0.99388 |
| 673 | 135.9492 | 23.36655 | 0.9954  | 673 | 136.3223 | 24.34883 | 0.99103 | 673 | 139.3368 | 22.42286 | 0.9905  | 673 | 136.0141 | 23.02361 | 0.99282 | 673 | 136.3739 | 23.29415 | 0.99383 |
| 674 | 136.0978 | 23.33475 | 0.99563 | 674 | 136.4744 | 24.32394 | 0.99103 | 674 | 139.5002 | 22.39961 | 0.99038 | 674 | 136.1647 | 22.99785 | 0.99273 | 674 | 136.5748 | 23.27608 | 0.99377 |
| 675 | 136.3029 | 23.31397 | 0.99537 | 675 | 136.6818 | 24.29851 | 0.9909  | 675 | 139.6605 | 22.36156 | 0.99041 | 675 | 136.362  | 22.97317 | 0.99264 | 675 | 136.7286 | 23.25581 | 0.99378 |
| 676 | 136.4639 | 23.30359 | 0.99529 | 676 | 136.8448 | 24.27417 | 0.9909  | 676 | 139.8588 | 22.32707 | 0.99054 | 676 | 136.5358 | 22.94674 | 0.99266 | 676 | 136.8933 | 23.24012 | 0.99384 |
| 677 | 136.6367 | 23.28761 | 0.99538 | 677 | 137.0101 | 24.25576 | 0.99097 | 677 | 140.0205 | 22.30227 | 0.99049 | 677 | 136.6954 | 22.92764 | 0.99277 | 677 | 137.057  | 23.2145  | 0.99383 |
| 678 | 136.7808 | 23.27232 | 0.99528 | 678 | 137.1586 | 24.22986 | 0.99099 | 678 | 140.1814 | 22.26914 | 0.99031 | 678 | 136.848  | 22.90132 | 0.9927  | 678 | 137.2585 | 23.19609 | 0.99375 |
| 679 | 136.9708 | 23.25329 | 0.99498 | 679 | 137.3706 | 24.20405 | 0.99082 | 679 | 140.3403 | 22.23816 | 0.99034 | 679 | 137.0403 | 22.87638 | 0.99261 | 679 | 137.4175 | 23.17254 | 0.99372 |
| 680 | 137.1462 | 23.23161 | 0.99469 | 680 | 137.5272 | 24.17969 | 0.99075 | 680 | 140.5396 | 22.20302 | 0.9905  | 680 | 137.2116 | 22.84849 | 0.99266 | 680 | 137.5868 | 23.15697 | 0.99378 |
| 681 | 137.3207 | 23.1993  | 0.99484 | 681 | 137.6949 | 24.15819 | 0.99086 | 681 | 140.7096 | 22.17875 | 0.99045 | 681 | 137.3827 | 22.8288  | 0.99276 | 681 | 137.7429 | 23.13303 | 0.99377 |
| 682 | 137.4521 | 23.16539 | 0.99484 | 682 | 137.8416 | 24.13497 | 0.99085 | 682 | 140.8584 | 22.14328 | 0.99031 | 682 | 137.5258 | 22.80448 | 0.99273 | 682 | 137.9501 | 23.11109 | 0.99369 |
| 683 | 137.6519 | 23.12521 | 0.99475 | 683 | 138.0508 | 24.10802 | 0.99076 | 683 | 141.0294 | 22.11391 | 0.99027 | 683 | 137.7244 | 22.7758  | 0.99258 | 683 | 138.1027 | 23.08918 | 0.99368 |
| 684 | 137.8389 | 23.10022 | 0.99465 | 684 | 138.2062 | 24.08219 | 0.99069 | 684 | 141.2199 | 22.07864 | 0.99039 | 684 | 137.9001 | 22.74933 | 0.9926  | 684 | 138.2692 | 23.07071 | 0.99377 |
| 685 | 138.0002 | 23.06405 | 0.99468 | 685 | 138.3794 | 24.0613  | 0.9908  | 685 | 141.3905 | 22.05644 | 0.99035 | 685 | 138.0652 | 22.73034 | 0.99268 | 685 | 138.4268 | 23.04367 | 0.99381 |
| 686 | 138.154  | 23.04495 | 0.9946  | 686 | 138.5249 | 24.03696 | 0.99082 | 686 | 141.5373 | 22.0228  | 0.99013 | 686 | 138.2103 | 22.70508 | 0.99267 | 686 | 138.6383 | 23.02443 | 0.99374 |
| 687 | 138.3365 | 23.00664 | 0.99442 | 687 | 138.7376 | 24.00879 | 0.99073 | 687 | 141.7116 | 21.99532 | 0.99006 | 687 | 138.414  | 22.67751 | 0.99255 | 687 | 138.7887 | 23.001   | 0.9937  |
| 688 | 138.5364 | 22.98908 | 0.99442 | 688 | 138.8985 | 23.98462 | 0.99063 | 688 | 141.8919 | 21.96661 | 0.99018 | 688 | 138.5747 | 22.65183 | 0.99252 | 688 | 138.9646 | 22.98005 | 0.99373 |
| 689 | 138.6901 | 22.97966 | 0.99445 | 689 | 139.0683 | 23.96237 | 0.99068 | 689 | 142.0774 | 21.93702 | 0.99021 | 689 | 138.7494 | 22.62969 | 0.99262 | 689 | 139.1102 | 22.95534 | 0.99375 |
| 690 | 138.8433 | 22.96537 | 0.99466 | 690 | 139.2091 | 23.94073 | 0.99073 | 690 | 142.2171 | 21.90606 | 0.99003 | 690 | 138.8874 | 22.6086  | 0.99269 | 690 | 139.239  | 22.93199 | 0.99364 |
| 691 | 139.0253 | 22.93753 | 0.99477 | 691 | 139.424  | 23.91003 | 0.99061 | 691 | 142.3904 | 21.88003 | 0.98999 | 691 | 139.0882 | 22.57913 | 0.9926  | 691 | 139.48   | 22.90992 | 0.99356 |
| 692 | 139.2162 | 22.91802 | 0.99476 | 692 | 139.5778 | 23.89051 | 0.99052 | 692 | 142.5742 | 21.84283 | 0.99008 | 692 | 139.2578 | 22.55432 | 0.99257 | 692 | 139.6505 | 22.89043 | 0.99359 |
| 693 | 139.3951 | 22.90652 | 0.99475 | 693 | 139.7518 | 23.86426 | 0.99057 | 693 | 142.7637 | 21.82065 | 0.99017 | 693 | 139.4381 | 22.5322  | 0.99264 | 693 | 139.7988 | 22.86449 | 0.99364 |
| 694 | 139.5385 | 22.9142  | 0.99462 | 694 | 139.8945 | 23.84671 | 0.99065 | 694 | 142.9    | 21.79134 | 0.98999 | 694 | 139.5717 | 22.51109 | 0.99266 | 694 | 140.0194 | 22.8406  | 0.99358 |
| 695 | 139.7023 | 22.88933 | 0.99488 | 695 | 140.0981 | 23.81163 | 0.99058 | 695 | 143.0844 | 21.76359 | 0.98991 | 695 | 139.7785 | 22.48102 | 0.99254 | 695 | 140.1621 | 22.8188  | 0.99351 |
| 696 | 139.9133 | 22.87491 | 0.99491 | 696 | 140.2628 | 23.79121 | 0.99048 | 696 | 143.251  | 21.73043 | 0.99    | 696 | 139.9475 | 22.45845 | 0.99248 | 696 | 140.3444 | 22.79792 | 0.99355 |
| 697 | 140.0607 | 22.84125 | 0.99456 | 697 | 140.4316 | 23.76433 | 0.99051 | 697 | 143.4464 | 21.70391 | 0.99006 | 697 | 140.1193 | 22.43248 | 0.9925  | 697 | 140.488  | 22.77341 | 0.9936  |
| 698 | 140.2463 | 22.82047 | 0.99477 | 698 | 140.5747 | 23.74402 | 0.99059 | 698 | 143.5848 | 21.67644 | 0.98992 | 698 | 140.2614 | 22.41442 | 0.99255 | 698 | 140.7047 | 22.74657 | 0.99358 |
| 699 | 140.3921 | 22.79651 | 0.99497 | 699 | 140.7811 | 23.70989 | 0.99057 | 699 | 143.7609 | 21.64838 | 0.98977 | 699 | 140.455  | 22.38347 | 0.99251 | 699 | 140.8555 | 22.72705 | 0.99351 |
| 700 | 140.6211 | 22.76902 | 0.99495 | 700 | 140.9512 | 23.68766 | 0.99045 | 700 | 143.9325 | 21.61647 | 0.98986 | 700 | 140.6301 | 22.36299 | 0.99243 | 700 | 141.0356 | 22.70181 | 0.99351 |
| 701 | 140.7693 | 22.74079 | 0.99487 | 701 | 141.1159 | 23.65929 | 0.99047 | 701 | 144.1329 | 21.58991 | 0.98996 | 701 | 140.8042 | 22.33872 | 0.99247 | 701 | 141.1739 | 22.68026 | 0.99356 |
| 702 | 140.9357 | 22.71265 | 0.99469 | 702 | 141.2728 | 23.63828 | 0.99058 | 702 | 144.2616 | 21.56356 | 0.98985 | 702 | 140.946  | 22.32108 | 0.99258 | 702 | 141.3965 | 22.65125 | 0.99357 |
| 703 | 141.0925 | 22.6954  | 0.99512 | 703 | 141.4652 | 23.60546 | 0.99057 | 703 | 144.4443 | 21.53151 | 0.9897  | 703 | 141.1372 | 22.28911 | 0.99248 | 703 | 141.5492 | 22.63324 | 0.99349 |
| 704 | 141.3009 | 22.66481 | 0.9952  | 704 | 141.6363 | 23.58137 | 0.99045 | 704 | 144.6165 | 21.50195 | 0.98973 | 704 | 141.3199 | 22.26896 | 0.99237 | 704 | 141.7162 | 22.60699 | 0.99346 |
| 705 | 141.4578 | 22.63461 | 0.99505 | 705 | 141.8019 | 23.55141 | 0.99041 | 705 | 144.8107 | 21.47108 | 0.98985 | 705 | 141.483  | 22.245   | 0.99236 | 705 | 141.8646 | 22.58761 | 0.99354 |
| 706 | 141.6426 | 22.60197 | 0.99522 | 706 | 141.959  | 23.5212  | 0.99052 | 706 | 144.9353 | 21.44802 | 0.98977 | 706 | 141.6382 | 22.22424 | 0.99244 | 706 | 142.0798 | 22.5662  | 0.99353 |
| 707 | 141.782  | 22.57397 | 0.99526 | 707 | 142.1477 | 23.49834 | 0.99051 | 707 | 145.1325 | 21.41795 | 0.98963 | 707 | 141.8246 | 22.19349 | 0.99245 | 707 | 142.237  | 22.53606 | 0.99347 |
| 708 | 141.9924 | 22.55636 | 0.99544 | 708 | 142.3325 | 23.47572 | 0.99033 | 708 | 145.2973 | 21.38793 | 0.98962 | 708 | 142.0075 | 22.17228 | 0.99234 | 708 | 142.4062 | 22.50966 | 0.99342 |
| 709 | 142.1363 | 22.55161 | 0.99521 | 709 | 142.4865 | 23.44834 | 0.99027 | 709 | 145.4968 | 21.35685 | 0.98978 | 709 | 142.1724 | 22.14563 | 0.99233 | 709 | 142.559  | 22.48892 | 0.9935  |
| 710 | 142.3233 | 22.52535 | 0.99511 | 710 | 142.6495 | 23.42839 | 0.99035 | 710 | 145.6429 | 21.33552 | 0.98977 | 710 | 142.333  | 22.12723 | 0.99243 | 710 | 142.7629 | 22.45525 | 0.99353 |
| 711 | 142.4559 | 22.51076 | 0.99518 | 711 | 142.8364 | 23.39467 | 0.99039 | 711 | 145.8088 | 21.30613 | 0.98962 | 711 | 142.502  | 22.0995  | 0.99245 | 711 | 142.9343 | 22.43288 | 0.99344 |
| 712 | 142.6953 | 22.48927 | 0.99504 | 712 | 143.0258 | 23.37277 | 0.99024 | 712 | 145.9808 | 21.27685 | 0.98965 | 712 | 142.6971 | 22.07404 | 0.99231 | 712 | 143.0899 | 22.40677 | 0.99348 |
| 713 | 142.8469 | 22.47763 | 0.99492 | 713 | 143.1776 | 23.34732 | 0.99012 | 713 | 146.1724 | 21.24594 | 0.98977 | 713 | 142.853  | 22.04759 | 0.99225 | 713 | 143.2454 | 22.38481 | 0.99341 |
| 714 | 143.0182 | 22.44455 | 0.9948  | 714 | 143.3506 | 23.32642 | 0.9902  | 714 | 146.3244 | 21.22269 | 0.9898  | 714 | 143.0162 | 22.02679 | 0.99232 | 714 | 143.4513 | 22.35662 | 0.99343 |
| 715 | 143.1676 | 22.41017 | 0.99458 | 715 | 143.5212 | 23.29704 | 0.99028 | 715 | 146.491  | 21.19277 | 0.98965 | 715 | 143.1903 | 21.99616 | 0.99234 | 715 | 143.6214 | 22.33609 | 0.99334 |
| 716 | 143.3923 | 22.39345 | 0.99455 | 716 | 143.7224 | 23.27682 | 0.99018 | 716 | 146.6653 | 21.16683 | 0.98961 | 716 | 143.3877 | 21.9747  | 0.9922  | 716 | 143.7826 | 22.30108 | 0.99328 |
| 717 | 143.5345 | 22.38291 | 0.9943  | 717 | 143.8644 | 23.2546  | 0.99012 | 717 | 146.8508 | 21.1357  | 0.9897  | 717 | 143.5367 | 21.94736 | 0.99213 | 717 | 143.9468 | 22.28066 | 0.99333 |
| 718 | 143.7088 | 22.35334 | 0.99418 | 718 | 144.0396 | 23.23564 | 0.99017 | 718 | 147.0099 | 21.11271 | 0.98969 | 718 | 143.7105 | 21.92591 | 0.99226 | 718 | 144.1345 | 22.24565 | 0.99338 |
| 719 | 143.8556 | 22.34928 | 0.99468 | 719 | 144.2099 | 23.20824 | 0.99027 | 719 | 147.1639 | 21.08438 | 0.98958 | 719 | 143.8776 | 21.89651 | 0.99233 | 719 | 144.3182 | 22.22269 | 0.99334 |
| 720 | 144.0761 | 22.32096 | 0.99472 | 720 | 144.4137 | 23.18936 | 0.99024 | 720 | 147.3432 | 21.05624 | 0.98947 | 720 | 144.0818 | 21.8745  | 0.99225 | 720 | 144.4721 | 22.19387 | 0.99329 |
| 721 | 144.2315 | 22.31452 | 0.99447 | 721 | 144.5539 | 23.16666 | 0.99012 | 721 | 147.5301 | 21.02494 | 0.98953 | 721 | 144.2306 | 21.84876 | 0.99219 | 721 | 144.6335 | 22.17192 | 0.99335 |
| 722 | 144.3953 | 22.28183 | 0.99452 | 722 | 144.7352 | 23.14901 | 0.99017 | 722 | 147.689  | 21.02494 | 0.98956 | 722 | 144.3992 | 21.82761 | 0.99226 | 722 | 144.8222 | 22.13713 | 0.9934  |
| 723 | 144.5426 | 22.25112 | 0.99438 | 723 | 144.8986 | 23.1221  | 0.99024 | 723 | 147.8401 | 20.97281 | 0.98941 | 723 | 144.5635 | 21.79592 | 0.99233 | 723 | 145.0069 | 22.11414 | 0.99338 |
| 724 | 144.7601 | 22.21653 | 0.99426 | 724 | 145.1033 | 23.10203 | 0.99021 | 724 | 148.0193 | 20.9433  | 0.98933 | 724 | 144.7747 | 21.77276 | 0.99224 | 724 | 145.154  |          |         |

|     |          |          |         |     |          |          |         |     |          |          |         |     |          |          |         |     |          |          |         |
|-----|----------|----------|---------|-----|----------|----------|---------|-----|----------|----------|---------|-----|----------|----------|---------|-----|----------|----------|---------|
| 785 | 155.2267 | 20.37727 | 0.9947  | 785 | 155.5633 | 21.62451 | 0.98896 | 785 | 158.3912 | 19.23393 | 0.98875 | 785 | 155.2803 | 20.31116 | 0.99134 | 785 | 155.571  | 20.24231 | 0.99272 |
| 786 | 155.3997 | 20.36624 | 0.99475 | 786 | 155.7139 | 21.60306 | 0.98901 | 786 | 158.5701 | 19.2089  | 0.98854 | 786 | 155.4233 | 20.2902  | 0.99136 | 786 | 155.7648 | 20.20727 | 0.99265 |
| 787 | 155.5552 | 20.34558 | 0.99467 | 787 | 155.8789 | 21.57493 | 0.98889 | 787 | 158.7379 | 19.18169 | 0.98853 | 787 | 155.6043 | 20.25903 | 0.99127 | 787 | 155.9339 | 20.17959 | 0.9926  |
| 788 | 155.7194 | 20.29428 | 0.99451 | 788 | 156.0706 | 21.54594 | 0.98882 | 788 | 158.8879 | 19.16094 | 0.98855 | 788 | 155.7894 | 20.23681 | 0.99127 | 788 | 156.1151 | 20.14847 | 0.99268 |
| 789 | 155.9145 | 20.245   | 0.99455 | 789 | 156.2461 | 21.52187 | 0.98893 | 789 | 159.0662 | 19.12694 | 0.98884 | 789 | 155.9705 | 20.2114  | 0.99137 | 789 | 156.2536 | 20.12263 | 0.99269 |
| 790 | 156.0742 | 20.22583 | 0.99416 | 790 | 156.3959 | 21.50259 | 0.98901 | 790 | 159.2562 | 19.10278 | 0.98816 | 790 | 156.1196 | 20.19237 | 0.99142 | 790 | 156.4318 | 20.08508 | 0.9926  |
| 791 | 156.2234 | 20.20931 | 0.994   | 791 | 156.5623 | 21.4756  | 0.98886 | 791 | 159.4196 | 19.07518 | 0.98811 | 791 | 156.2922 | 20.16086 | 0.9913  | 791 | 156.6158 | 20.05573 | 0.99254 |
| 792 | 156.4042 | 20.18335 | 0.9935  | 792 | 156.751  | 21.44911 | 0.98874 | 792 | 159.577  | 19.05337 | 0.98821 | 792 | 156.4823 | 20.13649 | 0.99124 | 792 | 156.7947 | 20.02377 | 0.99259 |
| 793 | 156.5823 | 20.14445 | 0.99332 | 793 | 156.9248 | 21.42348 | 0.98879 | 793 | 159.7306 | 19.02254 | 0.98809 | 793 | 156.657  | 20.11076 | 0.99128 | 793 | 156.9318 | 19.99741 | 0.99263 |
| 794 | 156.7505 | 20.12185 | 0.99333 | 794 | 157.0804 | 21.40428 | 0.98884 | 794 | 159.9362 | 18.99841 | 0.98791 | 794 | 156.806  | 20.08974 | 0.9913  | 794 | 157.1104 | 19.95798 | 0.99254 |
| 795 | 156.9025 | 20.07246 | 0.99308 | 795 | 157.2385 | 21.37617 | 0.98871 | 795 | 160.0976 | 18.96771 | 0.98787 | 795 | 156.9781 | 20.05819 | 0.99119 | 795 | 157.2907 | 19.92773 | 0.99248 |
| 796 | 157.0721 | 20.01159 | 0.99351 | 796 | 157.439  | 21.3489  | 0.98856 | 796 | 160.2605 | 18.94764 | 0.98793 | 796 | 157.17   | 20.03276 | 0.99107 | 796 | 157.4598 | 19.8947  | 0.99251 |
| 797 | 157.2537 | 19.96885 | 0.99385 | 797 | 157.6113 | 21.32467 | 0.98861 | 797 | 160.42   | 18.91463 | 0.98785 | 797 | 157.3373 | 20.00701 | 0.99112 | 797 | 157.6082 | 19.86595 | 0.99257 |
| 798 | 157.4449 | 19.91239 | 0.99389 | 798 | 157.7698 | 21.30635 | 0.98869 | 798 | 160.6199 | 18.89059 | 0.98764 | 798 | 157.4989 | 19.98565 | 0.99122 | 798 | 157.779  | 19.82707 | 0.99248 |
| 799 | 157.5961 | 19.87891 | 0.99378 | 799 | 157.9279 | 21.28062 | 0.98866 | 799 | 160.7727 | 18.86322 | 0.98759 | 799 | 157.6559 | 19.95548 | 0.99115 | 799 | 157.9677 | 19.79206 | 0.99242 |
| 800 | 157.7655 | 19.83975 | 0.99351 | 800 | 158.1264 | 21.25506 | 0.98856 | 800 | 160.9372 | 18.84069 | 0.98765 | 800 | 157.8565 | 19.92867 | 0.99104 | 800 | 158.1364 | 19.75625 | 0.99243 |
| 801 | 157.9486 | 19.81305 | 0.9935  | 801 | 158.2928 | 21.22807 | 0.98855 | 801 | 161.0968 | 18.80878 | 0.98764 | 801 | 158.025  | 19.9015  | 0.99109 | 801 | 158.2858 | 19.72538 | 0.99249 |
| 802 | 158.13   | 19.78702 | 0.99329 | 802 | 158.4579 | 21.2038  | 0.98866 | 802 | 161.31   | 18.78253 | 0.9875  | 802 | 158.1826 | 19.88072 | 0.99116 | 802 | 158.4502 | 19.68262 | 0.99242 |
| 803 | 158.2693 | 19.74278 | 0.99282 | 803 | 158.6087 | 21.18199 | 0.98865 | 803 | 161.4546 | 18.75629 | 0.98742 | 803 | 158.345  | 19.84959 | 0.99112 | 803 | 158.648  | 19.64634 | 0.99235 |
| 804 | 158.4473 | 19.6931  | 0.9923  | 804 | 158.8102 | 21.15379 | 0.98856 | 804 | 161.6318 | 18.73255 | 0.98755 | 804 | 158.5527 | 19.82425 | 0.99098 | 804 | 158.8051 | 19.6106  | 0.99233 |
| 805 | 158.6242 | 19.66316 | 0.99258 | 805 | 158.9775 | 21.12769 | 0.98858 | 805 | 161.7799 | 18.70324 | 0.98764 | 805 | 158.7089 | 19.79792 | 0.99097 | 805 | 158.9646 | 19.57807 | 0.99241 |
| 806 | 158.8032 | 19.62626 | 0.9933  | 806 | 159.1438 | 21.10849 | 0.98866 | 806 | 161.9904 | 18.6776  | 0.98749 | 806 | 158.8765 | 19.77539 | 0.99108 | 806 | 159.1241 | 19.53631 | 0.99238 |
| 807 | 158.9462 | 19.59864 | 0.99355 | 807 | 159.2869 | 21.08328 | 0.98865 | 807 | 162.1434 | 18.6523  | 0.98738 | 807 | 159.031  | 19.74468 | 0.99104 | 807 | 159.3229 | 19.50088 | 0.99229 |
| 808 | 159.128  | 19.57961 | 0.99328 | 808 | 159.497  | 21.05506 | 0.98853 | 808 | 162.3168 | 18.62912 | 0.98744 | 808 | 159.2348 | 19.71635 | 0.99087 | 808 | 159.4784 | 19.46336 | 0.99231 |
| 809 | 159.2961 | 19.54701 | 0.99312 | 809 | 159.6616 | 21.02991 | 0.98849 | 809 | 162.4166 | 18.6044  | 0.9875  | 809 | 159.3923 | 19.68991 | 0.99081 | 809 | 159.642  | 19.43101 | 0.99238 |
| 810 | 159.494  | 19.52421 | 0.99351 | 810 | 159.8351 | 21.00898 | 0.98854 | 810 | 162.6794 | 18.57647 | 0.98739 | 810 | 159.5655 | 19.66566 | 0.99088 | 810 | 159.7939 | 19.39299 | 0.99238 |
| 811 | 159.6263 | 19.50463 | 0.99389 | 811 | 159.9828 | 20.98466 | 0.98853 | 811 | 162.8274 | 18.55341 | 0.98724 | 811 | 159.7101 | 19.63613 | 0.9909  | 811 | 160.004  | 19.35656 | 0.99229 |
| 812 | 159.8046 | 19.45813 | 0.99352 | 812 | 160.1817 | 20.95809 | 0.98838 | 812 | 163      | 18.52922 | 0.98733 | 812 | 159.9229 | 19.6051  | 0.99078 | 812 | 160.1589 | 19.32157 | 0.99225 |
| 813 | 159.9887 | 19.41123 | 0.99357 | 813 | 160.345  | 20.93337 | 0.98829 | 813 | 163.1475 | 18.50278 | 0.98743 | 813 | 160.0786 | 19.57892 | 0.99075 | 813 | 160.3203 | 19.28952 | 0.99228 |
| 814 | 160.1654 | 19.37127 | 0.99389 | 814 | 160.5248 | 20.91154 | 0.98837 | 814 | 163.3631 | 18.47781 | 0.98735 | 814 | 160.2517 | 19.55306 | 0.99082 | 814 | 160.4731 | 19.25262 | 0.99229 |
| 815 | 160.3178 | 19.32477 | 0.99422 | 815 | 160.6626 | 20.8908  | 0.98839 | 815 | 163.5143 | 18.45594 | 0.9872  | 815 | 160.401  | 19.52149 | 0.99087 | 815 | 160.6784 | 19.21747 | 0.99219 |
| 816 | 160.4812 | 19.30998 | 0.99433 | 816 | 160.8687 | 20.86128 | 0.98827 | 816 | 163.6929 | 18.43166 | 0.98719 | 816 | 160.6143 | 19.49331 | 0.99073 | 816 | 160.8327 | 19.18241 | 0.99212 |
| 817 | 160.6506 | 19.26972 | 0.99424 | 817 | 161.0327 | 20.83933 | 0.98823 | 817 | 163.8538 | 18.41381 | 0.98729 | 817 | 160.7658 | 19.46573 | 0.99066 | 817 | 161.0051 | 19.15222 | 0.9922  |
| 818 | 160.8491 | 19.23868 | 0.99428 | 818 | 161.2038 | 20.81639 | 0.98831 | 818 | 164.0463 | 18.38348 | 0.98717 | 818 | 160.9439 | 19.43821 | 0.99074 | 818 | 161.152  | 19.11744 | 0.99223 |
| 819 | 160.9928 | 19.2203  | 0.99414 | 819 | 161.3439 | 20.79794 | 0.98839 | 819 | 164.2063 | 18.36474 | 0.98699 | 819 | 161.0828 | 19.41005 | 0.99079 | 819 | 161.3599 | 19.08168 | 0.99219 |
| 820 | 161.1589 | 19.19046 | 0.99384 | 820 | 161.553  | 20.76701 | 0.98832 | 820 | 164.3739 | 18.33871 | 0.98695 | 820 | 161.3015 | 19.3765  | 0.99067 | 820 | 161.5119 | 19.0501  | 0.99216 |
| 821 | 161.3444 | 19.16634 | 0.99363 | 821 | 161.7168 | 20.74781 | 0.98823 | 821 | 164.5204 | 18.31826 | 0.98704 | 821 | 161.4504 | 19.35043 | 0.99058 | 821 | 161.6837 | 19.01942 | 0.99224 |
| 822 | 161.5283 | 19.13739 | 0.99357 | 822 | 161.8917 | 20.72193 | 0.98828 | 822 | 164.7292 | 18.28775 | 0.98703 | 822 | 161.6252 | 19.32252 | 0.9906  | 822 | 161.8238 | 18.98468 | 0.99229 |
| 823 | 161.6926 | 19.10274 | 0.99375 | 823 | 162.0396 | 20.70528 | 0.98833 | 823 | 164.893  | 18.26765 | 0.98688 | 823 | 161.7718 | 19.29621 | 0.99065 | 823 | 162.041  | 18.94856 | 0.99224 |
| 824 | 161.8395 | 19.0751  | 0.99382 | 824 | 162.2296 | 20.67368 | 0.98823 | 824 | 165.0588 | 18.23977 | 0.98684 | 824 | 161.9892 | 19.26262 | 0.99056 | 824 | 162.1924 | 18.919   | 0.99218 |
| 825 | 162.0212 | 19.04698 | 0.99355 | 825 | 162.4095 | 20.65297 | 0.98811 | 825 | 165.2154 | 18.22106 | 0.98694 | 825 | 162.138  | 19.23888 | 0.99044 | 825 | 162.3686 | 18.8894  | 0.99223 |
| 826 | 162.211  | 19.00111 | 0.99347 | 826 | 162.5768 | 20.62812 | 0.9881  | 826 | 165.4099 | 18.1952  | 0.98689 | 826 | 162.3154 | 19.20862 | 0.99046 | 826 | 162.5083 | 18.85687 | 0.99229 |
| 827 | 162.3673 | 18.97595 | 0.99346 | 827 | 162.7257 | 20.60841 | 0.98815 | 827 | 165.5884 | 18.16876 | 0.98671 | 827 | 162.464  | 19.18576 | 0.99054 | 827 | 162.7172 | 18.82068 | 0.99222 |
| 828 | 162.5165 | 18.94973 | 0.99346 | 828 | 162.9183 | 20.57474 | 0.98811 | 828 | 165.7449 | 18.14554 | 0.98666 | 828 | 162.6738 | 19.15145 | 0.99053 | 828 | 162.8734 | 18.79227 | 0.99212 |
| 829 | 162.7058 | 18.90642 | 0.99301 | 829 | 163.0992 | 20.55605 | 0.98802 | 829 | 165.988  | 18.12617 | 0.98663 | 829 | 162.8344 | 19.1294  | 0.99044 | 829 | 163.0497 | 18.75969 | 0.99213 |
| 830 | 162.8783 | 18.87703 | 0.99283 | 830 | 163.2587 | 20.52754 | 0.98801 | 830 | 166.0897 | 18.0945  | 0.98661 | 830 | 163.0056 | 19.09916 | 0.99046 | 830 | 163.1868 | 18.73319 | 0.99219 |
| 831 | 163.0477 | 18.84846 | 0.99285 | 831 | 163.419  | 20.50663 | 0.98812 | 831 | 166.2715 | 18.0743  | 0.98647 | 831 | 163.1558 | 19.07863 | 0.99056 | 831 | 163.401  | 18.69244 | 0.99214 |
| 832 | 163.1948 | 18.80664 | 0.9929  | 832 | 163.5976 | 20.47341 | 0.98811 | 832 | 166.4168 | 18.04784 | 0.98639 | 832 | 163.3628 | 19.04315 | 0.99055 | 832 | 163.5609 | 18.66684 | 0.99208 |
| 833 | 163.3969 | 18.7738  | 0.99272 | 833 | 163.784  | 20.45018 | 0.98799 | 833 | 166.5809 | 18.02882 | 0.98648 | 833 | 163.527  | 19.02394 | 0.99041 | 833 | 163.7275 | 18.63315 | 0.99207 |
| 834 | 163.5651 | 18.72861 | 0.9926  | 834 | 163.9526 | 20.42186 | 0.98793 | 834 | 166.7619 | 17.99643 | 0.98661 | 834 | 163.6898 | 18.99383 | 0.9904  | 834 | 163.8721 | 18.6086  | 0.99215 |
| 835 | 163.7397 | 18.71066 | 0.99269 | 835 | 164.1083 | 20.40147 | 0.98798 | 835 | 166.9446 | 17.97399 | 0.9865  | 835 | 163.8511 | 18.97062 | 0.9905  | 835 | 164.0808 | 18.56893 | 0.99214 |
| 836 | 163.8804 | 18.66641 | 0.99307 | 836 | 164.2854 | 20.36642 | 0.98797 | 836 | 167.0983 | 17.94676 | 0.98638 | 836 | 164.0477 | 18.93846 | 0.99052 | 836 | 164.2437 | 18.5424  | 0.99203 |
| 837 | 164.0815 | 18.61501 | 0.99312 | 837 | 164.4813 | 20.34373 | 0.98782 | 837 | 167.2621 | 17.92618 | 0.98648 | 837 | 164.2204 | 18.91592 | 0.99043 | 837 | 164.4118 | 18.5106  | 0.      |

|     |          |          |         |     |          |          |         |     |          |          |         |     |          |          |         |     |          |          |         |
|-----|----------|----------|---------|-----|----------|----------|---------|-----|----------|----------|---------|-----|----------|----------|---------|-----|----------|----------|---------|
| 898 | 174.4515 | 16.52446 | 0.99224 | 898 | 174.9498 | 18.77226 | 0.98655 | 898 | 177.6937 | 16.3341  | 0.98456 | 898 | 174.7096 | 17.17399 | 0.9894  | 898 | 174.7949 | 16.7882  | 0.99129 |
| 899 | 174.622  | 16.48686 | 0.99202 | 899 | 175.0869 | 18.74933 | 0.9864  | 899 | 177.8681 | 16.3091  | 0.98459 | 899 | 174.8561 | 17.14431 | 0.98939 | 899 | 174.9686 | 16.76388 | 0.99125 |
| 900 | 174.7832 | 16.44982 | 0.99186 | 900 | 175.2713 | 18.72464 | 0.98631 | 900 | 178.07   | 16.2879  | 0.98465 | 900 | 175.0555 | 17.11237 | 0.98924 | 900 | 175.1529 | 16.73562 | 0.9913  |
| 901 | 174.9275 | 16.42497 | 0.99203 | 901 | 175.4403 | 18.69845 | 0.98633 | 901 | 178.2106 | 16.26349 | 0.98457 | 901 | 175.2322 | 17.08073 | 0.98924 | 901 | 175.3323 | 16.71656 | 0.99135 |
| 902 | 175.1329 | 16.3841  | 0.99233 | 902 | 175.6378 | 18.67218 | 0.98643 | 902 | 178.3555 | 16.23807 | 0.98442 | 902 | 175.4023 | 17.05516 | 0.98934 | 902 | 175.4712 | 16.69171 | 0.99129 |
| 903 | 175.3053 | 16.35312 | 0.99229 | 903 | 175.7731 | 18.65209 | 0.98639 | 903 | 178.5318 | 16.21365 | 0.98441 | 903 | 175.5462 | 17.02684 | 0.98936 | 903 | 175.6401 | 16.66532 | 0.99124 |
| 904 | 175.4537 | 16.32136 | 0.99211 | 904 | 175.9489 | 18.62222 | 0.98627 | 904 | 178.7447 | 16.18658 | 0.9845  | 904 | 175.7445 | 16.99691 | 0.98924 | 904 | 175.8397 | 16.63908 | 0.99128 |
| 905 | 175.6056 | 16.27487 | 0.99211 | 905 | 176.1266 | 18.59377 | 0.98627 | 905 | 178.9023 | 16.16595 | 0.98446 | 905 | 175.9098 | 16.96653 | 0.98921 | 905 | 176.0116 | 16.6191  | 0.99135 |
| 906 | 175.8204 | 16.22629 | 0.99206 | 906 | 176.3225 | 18.56585 | 0.98637 | 906 | 179.0665 | 16.13832 | 0.98432 | 906 | 176.0868 | 16.9416  | 0.98931 | 906 | 176.1556 | 16.59403 | 0.99131 |
| 907 | 175.9835 | 16.18137 | 0.99208 | 907 | 176.457  | 18.54513 | 0.98631 | 907 | 179.2358 | 16.11343 | 0.98427 | 907 | 176.2284 | 16.9167  | 0.9893  | 907 | 176.3396 | 16.56786 | 0.9912  |
| 908 | 176.1296 | 16.1447  | 0.99192 | 908 | 176.6345 | 18.51413 | 0.98619 | 908 | 179.4278 | 16.08584 | 0.98437 | 908 | 176.4221 | 16.88256 | 0.98918 | 908 | 176.5158 | 16.54052 | 0.99122 |
| 909 | 176.2968 | 16.11356 | 0.99178 | 909 | 176.8104 | 18.48786 | 0.98615 | 909 | 179.5909 | 16.06741 | 0.98436 | 909 | 176.5931 | 16.85634 | 0.98912 | 909 | 176.7026 | 16.51969 | 0.99127 |
| 910 | 176.4726 | 16.06665 | 0.9917  | 910 | 176.9983 | 18.45879 | 0.98625 | 910 | 179.7447 | 16.03965 | 0.98421 | 910 | 176.7665 | 16.82837 | 0.9892  | 910 | 176.8433 | 16.49542 | 0.99122 |
| 911 | 176.6516 | 16.05368 | 0.99179 | 911 | 177.1464 | 18.43743 | 0.9863  | 911 | 179.9233 | 16.01307 | 0.98417 | 911 | 176.9067 | 16.80356 | 0.98922 | 911 | 177.0212 | 16.46808 | 0.99114 |
| 912 | 176.7925 | 16.04278 | 0.9918  | 912 | 177.3152 | 18.41146 | 0.98621 | 912 | 180.1129 | 15.98749 | 0.98426 | 912 | 177.1097 | 16.76491 | 0.9891  | 912 | 177.201  | 16.44261 | 0.99113 |
| 913 | 176.9783 | 16.0307  | 0.99176 | 913 | 177.4912 | 18.38321 | 0.9862  | 913 | 180.279  | 15.96701 | 0.98425 | 913 | 177.2815 | 16.73954 | 0.98904 | 913 | 177.3873 | 16.42007 | 0.99119 |
| 914 | 177.1433 | 15.99479 | 0.99175 | 914 | 177.6831 | 18.3532  | 0.98631 | 914 | 180.4344 | 15.93846 | 0.9841  | 914 | 177.4552 | 16.71086 | 0.98909 | 914 | 177.5248 | 16.39752 | 0.99122 |
| 915 | 177.3339 | 15.9611  | 0.99165 | 915 | 177.8316 | 18.33349 | 0.9863  | 915 | 180.6101 | 15.91342 | 0.98399 | 915 | 177.6032 | 16.68694 | 0.98911 | 915 | 177.7059 | 16.36811 | 0.99114 |
| 916 | 177.4744 | 15.91925 | 0.99182 | 916 | 177.9928 | 18.30357 | 0.98615 | 916 | 180.7938 | 15.88557 | 0.98408 | 916 | 177.7886 | 16.65264 | 0.98896 | 916 | 177.8847 | 16.34353 | 0.99111 |
| 917 | 177.6372 | 15.8934  | 0.99193 | 917 | 178.1815 | 18.27405 | 0.98606 | 917 | 180.9697 | 15.8643  | 0.98407 | 917 | 177.9643 | 16.62689 | 0.98887 | 917 | 178.0622 | 16.31782 | 0.99116 |
| 918 | 177.8198 | 15.87016 | 0.99187 | 918 | 178.3639 | 18.2441  | 0.9861  | 918 | 181.1112 | 15.83797 | 0.98389 | 918 | 178.1357 | 16.597   | 0.98886 | 918 | 178.2082 | 16.29253 | 0.99114 |
| 919 | 178.018  | 15.84087 | 0.99174 | 919 | 178.5189 | 18.2229  | 0.98613 | 919 | 181.2932 | 15.80983 | 0.98378 | 919 | 178.2824 | 16.57518 | 0.98897 | 919 | 178.3817 | 16.26532 | 0.99104 |
| 920 | 178.1558 | 15.8028  | 0.99176 | 920 | 178.6806 | 18.19312 | 0.986   | 920 | 181.4777 | 15.78105 | 0.98381 | 920 | 178.4675 | 16.5405  | 0.98891 | 920 | 178.5697 | 16.23971 | 0.99101 |
| 921 | 178.336  | 15.78469 | 0.992   | 921 | 178.8688 | 18.16335 | 0.98594 | 921 | 181.6488 | 15.76096 | 0.98383 | 921 | 178.653  | 16.51475 | 0.98882 | 921 | 178.7531 | 16.21265 | 0.99104 |
| 922 | 178.506  | 15.76204 | 0.99192 | 922 | 179.0488 | 18.13678 | 0.98602 | 922 | 181.7918 | 15.73284 | 0.98372 | 922 | 178.8096 | 16.48433 | 0.98884 | 922 | 178.911  | 16.1905  | 0.99106 |
| 923 | 178.6994 | 15.73259 | 0.99157 | 923 | 179.2093 | 18.11669 | 0.98607 | 923 | 181.9804 | 15.70382 | 0.98361 | 923 | 178.9684 | 16.45935 | 0.98894 | 923 | 179.0671 | 16.15759 | 0.99101 |
| 924 | 178.8304 | 15.69184 | 0.9913  | 924 | 179.3623 | 18.09032 | 0.986   | 924 | 182.1611 | 15.67384 | 0.98363 | 924 | 179.1543 | 16.4229  | 0.98893 | 924 | 179.2549 | 16.12903 | 0.99099 |
| 925 | 178.9963 | 15.64138 | 0.99129 | 925 | 179.554  | 18.06265 | 0.98594 | 925 | 182.3449 | 15.65106 | 0.98376 | 925 | 179.339  | 16.39518 | 0.98881 | 925 | 179.4301 | 16.1005  | 0.99104 |
| 926 | 179.1681 | 15.60314 | 0.99134 | 926 | 179.7324 | 18.03584 | 0.98596 | 926 | 182.4838 | 15.62345 | 0.98366 | 926 | 179.5005 | 16.36342 | 0.98878 | 926 | 179.5812 | 16.0749  | 0.99108 |
| 927 | 179.3725 | 15.57281 | 0.99136 | 927 | 179.8959 | 18.01481 | 0.98603 | 927 | 182.6667 | 15.594   | 0.98357 | 927 | 179.6556 | 16.33756 | 0.98882 | 927 | 179.7516 | 16.04215 | 0.99097 |
| 928 | 179.5086 | 15.5397  | 0.99107 | 928 | 180.0475 | 17.98814 | 0.98597 | 928 | 182.8475 | 15.56507 | 0.98359 | 928 | 179.8303 | 16.29851 | 0.98879 | 928 | 179.9386 | 16.01298 | 0.99089 |
| 929 | 179.69   | 15.5136  | 0.99137 | 929 | 180.2436 | 17.96144 | 0.98585 | 929 | 183.0349 | 15.54124 | 0.98365 | 929 | 180.0258 | 16.26877 | 0.98867 | 929 | 180.1172 | 15.98093 | 0.99092 |
| 930 | 179.8661 | 15.48356 | 0.99149 | 930 | 180.4144 | 17.93098 | 0.98584 | 930 | 183.1661 | 15.51561 | 0.98354 | 930 | 180.1818 | 16.23567 | 0.98858 | 930 | 180.2712 | 15.95764 | 0.99093 |
| 931 | 180.0826 | 15.46043 | 0.99172 | 931 | 180.5871 | 17.91007 | 0.98589 | 931 | 183.352  | 15.48556 | 0.98336 | 931 | 180.3419 | 16.20848 | 0.98866 | 931 | 180.4319 | 15.92429 | 0.99087 |
| 932 | 180.2059 | 15.43274 | 0.99166 | 932 | 180.733  | 17.88347 | 0.98583 | 932 | 183.5312 | 15.45874 | 0.98335 | 932 | 180.5123 | 16.18084 | 0.98865 | 932 | 180.6303 | 15.89424 | 0.99078 |
| 933 | 180.3837 | 15.42483 | 0.99167 | 933 | 180.9312 | 17.85376 | 0.98568 | 933 | 183.7127 | 15.43114 | 0.98341 | 933 | 180.7084 | 16.14116 | 0.98854 | 933 | 180.8008 | 15.86538 | 0.9908  |
| 934 | 180.5368 | 15.38228 | 0.99172 | 934 | 181.1019 | 17.82262 | 0.98564 | 934 | 183.8553 | 15.40857 | 0.9834  | 934 | 180.8575 | 16.10806 | 0.98847 | 934 | 180.957  | 15.84131 | 0.99085 |
| 935 | 180.7446 | 15.34451 | 0.99166 | 935 | 181.276  | 17.80162 | 0.98572 | 935 | 184.0433 | 15.37876 | 0.98325 | 935 | 181.0268 | 16.08041 | 0.98852 | 935 | 181.1149 | 15.81142 | 0.99081 |
| 936 | 180.8915 | 15.31353 | 0.991   | 936 | 181.4166 | 17.77565 | 0.98568 | 936 | 184.2186 | 15.35186 | 0.98324 | 936 | 181.1878 | 16.04409 | 0.98859 | 936 | 181.3141 | 15.78103 | 0.99072 |
| 937 | 181.0723 | 15.2833  | 0.99094 | 937 | 181.6215 | 17.7456  | 0.98553 | 937 | 184.407  | 15.32281 | 0.98337 | 937 | 181.396  | 16.01475 | 0.98845 | 937 | 181.4783 | 15.75279 | 0.99071 |
| 938 | 181.2083 | 15.24407 | 0.9913  | 938 | 181.7836 | 17.72023 | 0.9855  | 938 | 184.5506 | 15.30207 | 0.9834  | 938 | 181.548  | 15.98241 | 0.98839 | 938 | 181.6444 | 15.72679 | 0.99079 |
| 939 | 181.4284 | 15.20262 | 0.99114 | 939 | 181.9635 | 17.69606 | 0.98557 | 939 | 184.727  | 15.27217 | 0.98328 | 939 | 181.7142 | 15.95434 | 0.98844 | 939 | 181.7974 | 15.6998  | 0.99078 |
| 940 | 181.5529 | 15.18317 | 0.99085 | 940 | 182.1077 | 17.67333 | 0.98559 | 940 | 184.9111 | 15.24505 | 0.98317 | 940 | 181.8778 | 15.91817 | 0.98851 | 940 | 181.9954 | 15.66917 | 0.99072 |
| 941 | 181.7384 | 15.15033 | 0.99069 | 941 | 182.3024 | 17.6441  | 0.98547 | 941 | 185.0848 | 15.21492 | 0.98327 | 941 | 182.0864 | 15.88732 | 0.98842 | 941 | 182.1642 | 15.64079 | 0.99071 |
| 942 | 181.9087 | 15.10492 | 0.9911  | 942 | 182.4775 | 17.62023 | 0.98538 | 942 | 185.2343 | 15.19207 | 0.98326 | 942 | 182.2258 | 15.85671 | 0.98831 | 942 | 182.3264 | 15.61625 | 0.99077 |
| 943 | 182.1038 | 15.08218 | 0.99146 | 943 | 182.6594 | 17.59517 | 0.98546 | 943 | 185.4048 | 15.1625  | 0.98308 | 943 | 182.4075 | 15.82796 | 0.98835 | 943 | 182.4772 | 15.58638 | 0.99076 |
| 944 | 182.2742 | 15.05133 | 0.99098 | 944 | 182.7962 | 17.57453 | 0.98551 | 944 | 185.5837 | 15.13437 | 0.98296 | 944 | 182.5591 | 15.79402 | 0.98842 | 944 | 182.6903 | 15.55517 | 0.99068 |
| 945 | 182.43   | 15.02453 | 0.9907  | 945 | 182.9666 | 17.54427 | 0.98535 | 945 | 185.765  | 15.10434 | 0.98305 | 945 | 182.7694 | 15.76341 | 0.98839 | 945 | 182.8442 | 15.5269  | 0.99063 |
| 946 | 182.5922 | 14.99691 | 0.99091 | 946 | 183.17   | 17.52311 | 0.98524 | 946 | 185.9184 | 15.08172 | 0.98308 | 946 | 182.9132 | 15.73377 | 0.9883  | 946 | 183.0197 | 15.5005  | 0.99071 |
| 947 | 182.7979 | 14.97296 | 0.99129 | 947 | 183.3465 | 17.49836 | 0.98528 | 947 | 186.075  | 15.05239 | 0.9829  | 947 | 183.095  | 15.70753 | 0.98832 | 947 | 183.1647 | 15.47271 | 0.99074 |
| 948 | 182.9461 | 14.92221 | 0.9914  | 948 | 183.4933 | 17.47912 | 0.98531 | 948 | 186.2731 | 15.02371 | 0.98279 | 948 | 183.2435 | 15.67202 | 0.98842 | 948 | 183.3697 | 15.44138 | 0.99065 |
| 949 | 183.1104 | 14.9466  | 0.99134 | 949 | 183.6826 | 17.44992 | 0.98521 | 949 | 186.4518 | 14.99456 | 0.98285 | 949 | 183.465  | 15.64043 | 0.98839 | 949 | 183.5341 | 15.40985 | 0.99061 |
| 950 | 183.2862 | 14.91231 | 0.99123 | 950 | 183.8586 | 17.42866 | 0.98509 | 950 | 186.6069 | 14.97285 | 0.98291 | 950 | 183.6048 | 15.61289 | 0.98824 | 950 | 183.7109 | 15.3843  | 0.9906  |



|      |          |          |         |      |          |          |         |      |          |          |         |      |          |          |         |      |          |          |         |
|------|----------|----------|---------|------|----------|----------|---------|------|----------|----------|---------|------|----------|----------|---------|------|----------|----------|---------|
| 1011 | 193.7108 | 13.18811 | 0.98861 | 1011 | 194.3514 | 15.80519 | 0.98371 | 1011 | 197.0708 | 13.30848 | 0.98082 | 1011 | 194.0539 | 13.80345 | 0.98713 | 1011 | 194.151  | 13.66941 | 0.98976 |
| 1012 | 193.8834 | 13.1499  | 0.98864 | 1012 | 194.4932 | 15.77685 | 0.98356 | 1012 | 197.2192 | 13.28599 | 0.98095 | 1012 | 194.2226 | 13.77145 | 0.98701 | 1012 | 194.3185 | 13.64189 | 0.98978 |
| 1013 | 194.0609 | 13.11699 | 0.98837 | 1013 | 194.6624 | 15.751   | 0.98352 | 1013 | 197.4174 | 13.24986 | 0.9809  | 1013 | 194.412  | 13.74126 | 0.98695 | 1013 | 194.5176 | 13.60973 | 0.98981 |
| 1014 | 194.1939 | 13.08632 | 0.9883  | 1014 | 194.8442 | 15.71528 | 0.98357 | 1014 | 197.5882 | 13.22471 | 0.98072 | 1014 | 194.5859 | 13.71026 | 0.987   | 1014 | 194.6813 | 13.58757 | 0.98975 |
| 1015 | 194.4069 | 13.04115 | 0.98799 | 1015 | 195.0385 | 15.69059 | 0.98356 | 1015 | 197.7579 | 13.1924  | 0.98071 | 1015 | 194.743  | 13.68718 | 0.98707 | 1015 | 194.8379 | 13.55751 | 0.98966 |
| 1016 | 194.5824 | 13.02166 | 0.98783 | 1016 | 195.1752 | 15.66119 | 0.98341 | 1016 | 197.9055 | 13.16937 | 0.98081 | 1016 | 194.9012 | 13.65729 | 0.98698 | 1016 | 195.0133 | 13.52932 | 0.98966 |
| 1017 | 194.7602 | 13.00022 | 0.9879  | 1017 | 195.3601 | 15.63344 | 0.98335 | 1017 | 198.1011 | 13.15159 | 0.98076 | 1017 | 195.1019 | 13.62656 | 0.98692 | 1017 | 195.2051 | 13.49844 | 0.98971 |
| 1018 | 194.8942 | 13.00681 | 0.9879  | 1018 | 195.5257 | 15.60102 | 0.98345 | 1018 | 198.2795 | 13.10548 | 0.98055 | 1018 | 195.2691 | 13.59717 | 0.98697 | 1018 | 195.3711 | 13.47675 | 0.98967 |
| 1019 | 195.092  | 12.97146 | 0.98795 | 1019 | 195.7281 | 15.57616 | 0.9835  | 1019 | 198.4385 | 13.07466 | 0.98047 | 1019 | 195.4237 | 13.57344 | 0.98704 | 1019 | 195.5273 | 13.44524 | 0.98958 |
| 1020 | 195.2445 | 12.96174 | 0.98806 | 1020 | 195.8669 | 15.54722 | 0.98338 | 1020 | 198.5988 | 13.04939 | 0.98057 | 1020 | 195.5806 | 13.54357 | 0.98701 | 1020 | 195.6975 | 13.41791 | 0.98959 |
| 1021 | 195.4365 | 12.93454 | 0.98815 | 1021 | 196.0452 | 15.52233 | 0.98332 | 1021 | 198.7864 | 13.01409 | 0.98055 | 1021 | 195.7845 | 13.51188 | 0.98689 | 1021 | 195.8851 | 13.3857  | 0.98965 |
| 1022 | 195.5676 | 12.90831 | 0.98832 | 1022 | 196.2105 | 15.48989 | 0.98339 | 1022 | 198.9686 | 12.98801 | 0.98041 | 1022 | 195.9479 | 13.4814  | 0.98688 | 1022 | 196.063  | 13.36447 | 0.98964 |
| 1023 | 195.7589 | 12.88103 | 0.98812 | 1023 | 196.4165 | 15.46246 | 0.98344 | 1023 | 199.1306 | 12.95701 | 0.98029 | 1023 | 196.1142 | 13.45585 | 0.98693 | 1023 | 196.2107 | 13.33492 | 0.98954 |
| 1024 | 195.9294 | 12.84428 | 0.98811 | 1024 | 196.5486 | 15.43967 | 0.98329 | 1024 | 199.2925 | 12.93471 | 0.98039 | 1024 | 196.2654 | 13.42569 | 0.9869  | 1024 | 196.3887 | 13.30909 | 0.98949 |
| 1025 | 196.1023 | 12.80783 | 0.98803 | 1025 | 196.7356 | 15.4109  | 0.9832  | 1025 | 199.4646 | 12.89584 | 0.98044 | 1025 | 196.4669 | 13.39333 | 0.98672 | 1025 | 196.5756 | 13.28149 | 0.98953 |
| 1026 | 196.2549 | 12.79326 | 0.98807 | 1026 | 196.9009 | 15.3804  | 0.98328 | 1026 | 199.6593 | 12.87423 | 0.98027 | 1026 | 196.632  | 13.36182 | 0.98666 | 1026 | 196.7528 | 13.26189 | 0.98954 |
| 1027 | 196.4315 | 12.75484 | 0.98798 | 1027 | 197.1034 | 15.35162 | 0.98335 | 1027 | 199.8152 | 12.84228 | 0.98015 | 1027 | 196.8006 | 13.33598 | 0.98676 | 1027 | 196.897  | 13.23695 | 0.98946 |
| 1028 | 196.6259 | 12.74365 | 0.98775 | 1028 | 197.2435 | 15.33008 | 0.98326 | 1028 | 199.9793 | 12.81757 | 0.98021 | 1028 | 196.9466 | 13.30579 | 0.98676 | 1028 | 197.0718 | 13.21263 | 0.98941 |
| 1029 | 196.7806 | 12.69724 | 0.98774 | 1029 | 197.4217 | 15.29968 | 0.98314 | 1029 | 200.1494 | 12.78318 | 0.98027 | 1029 | 197.1582 | 13.27142 | 0.98661 | 1029 | 197.2562 | 13.18334 | 0.98944 |
| 1030 | 196.9453 | 12.65912 | 0.98753 | 1030 | 197.5854 | 15.27225 | 0.98319 | 1030 | 200.3485 | 12.75665 | 0.98019 | 1030 | 197.3131 | 13.24236 | 0.98658 | 1030 | 197.4431 | 13.15897 | 0.98948 |
| 1031 | 197.1159 | 12.62021 | 0.98742 | 1031 | 197.7901 | 15.24092 | 0.98326 | 1031 | 200.4968 | 12.72529 | 0.98008 | 1031 | 197.4848 | 13.21479 | 0.98668 | 1031 | 197.5909 | 13.13201 | 0.98939 |
| 1032 | 197.3082 | 12.59137 | 0.98732 | 1032 | 197.9355 | 15.21919 | 0.98315 | 1032 | 200.6693 | 12.69788 | 0.9801  | 1032 | 197.6281 | 13.18474 | 0.98675 | 1032 | 197.763  | 13.10721 | 0.98935 |
| 1033 | 197.4685 | 12.56456 | 0.98699 | 1033 | 198.1047 | 15.1896  | 0.983   | 1033 | 200.8338 | 12.66959 | 0.9802  | 1033 | 197.8384 | 13.15122 | 0.98664 | 1033 | 197.9418 | 13.07285 | 0.98936 |
| 1034 | 197.6162 | 12.54274 | 0.98655 | 1034 | 198.275  | 15.16184 | 0.98301 | 1034 | 201.0382 | 12.63578 | 0.98005 | 1034 | 197.9985 | 13.12179 | 0.98658 | 1034 | 198.1269 | 13.04936 | 0.98944 |
| 1035 | 197.7952 | 12.51058 | 0.98681 | 1035 | 198.4759 | 15.13057 | 0.98306 | 1035 | 201.1863 | 12.6071  | 0.97991 | 1035 | 198.1761 | 13.0936  | 0.98668 | 1035 | 198.2692 | 13.02017 | 0.98939 |
| 1036 | 197.9867 | 12.4893  | 0.98686 | 1036 | 198.6214 | 15.10649 | 0.98303 | 1036 | 201.3622 | 12.57776 | 0.9799  | 1036 | 198.3155 | 13.06532 | 0.98672 | 1036 | 198.4615 | 12.99356 | 0.98935 |
| 1037 | 198.1459 | 12.4607  | 0.98693 | 1037 | 198.7932 | 15.07649 | 0.98288 | 1037 | 201.515  | 12.542   | 0.98002 | 1037 | 198.5265 | 13.03112 | 0.98663 | 1037 | 198.6319 | 12.96088 | 0.9894  |
| 1038 | 198.3154 | 12.4236  | 0.98687 | 1038 | 198.9672 | 15.04824 | 0.9829  | 1038 | 201.7306 | 12.51173 | 0.97995 | 1038 | 198.6833 | 13.00431 | 0.98652 | 1038 | 198.8245 | 12.93402 | 0.98944 |
| 1039 | 198.4715 | 12.37379 | 0.98694 | 1039 | 199.1614 | 15.01761 | 0.98303 | 1039 | 201.8682 | 12.48118 | 0.97993 | 1039 | 198.8566 | 12.97394 | 0.98659 | 1039 | 198.9613 | 12.91009 | 0.98939 |
| 1040 | 198.6717 | 12.3417  | 0.98721 | 1040 | 199.3194 | 14.99422 | 0.98305 | 1040 | 202.0474 | 12.45219 | 0.97986 | 1040 | 199.0024 | 12.94682 | 0.98667 | 1040 | 199.1395 | 12.88035 | 0.9893  |
| 1041 | 198.8232 | 12.29667 | 0.98739 | 1041 | 199.4798 | 14.96567 | 0.98296 | 1041 | 202.2008 | 12.41806 | 0.97998 | 1041 | 199.2007 | 12.91038 | 0.9866  | 1041 | 199.3201 | 12.84964 | 0.9893  |
| 1042 | 198.9917 | 12.25692 | 0.98729 | 1042 | 199.6561 | 14.93651 | 0.98295 | 1042 | 202.4113 | 12.38733 | 0.97997 | 1042 | 199.3662 | 12.8846  | 0.98652 | 1042 | 199.5161 | 12.82192 | 0.98935 |
| 1043 | 199.1414 | 12.20387 | 0.98709 | 1043 | 199.8555 | 14.907   | 0.98306 | 1043 | 202.5557 | 12.35755 | 0.97976 | 1043 | 199.5413 | 12.85187 | 0.98653 | 1043 | 199.6503 | 12.79932 | 0.98933 |
| 1044 | 199.3568 | 12.16531 | 0.98701 | 1044 | 200.0078 | 14.88591 | 0.98308 | 1044 | 202.736  | 12.32858 | 0.97972 | 1044 | 199.6882 | 12.82863 | 0.98661 | 1044 | 199.8315 | 12.77006 | 0.98924 |
| 1045 | 199.5067 | 12.13522 | 0.98706 | 1045 | 200.1698 | 14.85594 | 0.98293 | 1045 | 202.8846 | 12.29826 | 0.97981 | 1045 | 199.8881 | 12.79006 | 0.98655 | 1045 | 200.0106 | 12.74003 | 0.98924 |
| 1046 | 199.6715 | 12.10701 | 0.98694 | 1046 | 200.3475 | 14.82889 | 0.98284 | 1046 | 203.1048 | 12.25616 | 0.9798  | 1046 | 200.0592 | 12.76107 | 0.98664 | 1046 | 200.1991 | 12.71092 | 0.98931 |
| 1047 | 199.829  | 12.06838 | 0.98682 | 1047 | 200.5333 | 14.79964 | 0.98288 | 1047 | 203.2525 | 12.2303  | 0.97962 | 1047 | 200.2258 | 12.73174 | 0.98664 | 1047 | 200.3447 | 12.69021 | 0.9893  |
| 1048 | 200.0358 | 12.02871 | 0.98697 | 1048 | 200.7024 | 14.77864 | 0.98291 | 1048 | 203.425  | 12.19408 | 0.97958 | 1048 | 200.3738 | 12.70613 | 0.98647 | 1048 | 200.5183 | 12.66114 | 0.98922 |
| 1049 | 200.174  | 11.99747 | 0.98702 | 1049 | 200.8572 | 14.74885 | 0.98276 | 1049 | 203.5792 | 12.16434 | 0.97964 | 1049 | 200.5737 | 12.66692 | 0.98646 | 1049 | 200.6997 | 12.63106 | 0.98919 |
| 1050 | 200.3627 | 11.9782  | 0.98723 | 1050 | 201.0352 | 14.71834 | 0.98266 | 1050 | 203.7872 | 12.12846 | 0.97966 | 1050 | 200.7455 | 12.63955 | 0.98635 | 1050 | 200.8858 | 12.60238 | 0.98925 |
| 1051 | 200.5003 | 11.95672 | 0.9874  | 1051 | 201.2236 | 14.68794 | 0.98271 | 1051 | 203.9393 | 12.10284 | 0.97948 | 1051 | 200.9065 | 12.60683 | 0.98631 | 1051 | 201.0347 | 12.5795  | 0.98928 |
| 1052 | 200.7162 | 11.93324 | 0.98731 | 1052 | 201.3914 | 14.66376 | 0.98276 | 1052 | 204.1126 | 12.06819 | 0.9794  | 1052 | 201.0634 | 12.58014 | 0.98636 | 1052 | 201.2011 | 12.54771 | 0.9892  |
| 1053 | 200.8726 | 11.91439 | 0.98731 | 1053 | 201.542  | 14.63121 | 0.98264 | 1053 | 204.2684 | 12.04032 | 0.97946 | 1053 | 201.2495 | 12.54155 | 0.98632 | 1053 | 201.3901 | 12.51754 | 0.98913 |
| 1054 | 201.0379 | 11.89497 | 0.98707 | 1054 | 201.7304 | 14.599   | 0.98255 | 1054 | 204.4698 | 12.00488 | 0.97952 | 1054 | 201.4296 | 12.51085 | 0.98621 | 1054 | 201.5761 | 12.48755 | 0.98919 |
| 1055 | 201.1882 | 11.85009 | 0.98686 | 1055 | 201.9103 | 14.56691 | 0.98257 | 1055 | 204.6331 | 11.97825 | 0.97937 | 1055 | 201.5902 | 12.47648 | 0.98612 | 1055 | 201.7235 | 12.46493 | 0.9892  |
| 1056 | 201.4026 | 11.81044 | 0.9866  | 1056 | 202.082  | 14.53958 | 0.98261 | 1056 | 204.7966 | 11.94461 | 0.97923 | 1056 | 201.7441 | 12.44782 | 0.98614 | 1056 | 201.8944 | 12.43257 | 0.98911 |
| 1057 | 201.545  | 11.77387 | 0.98619 | 1057 | 202.2276 | 14.50897 | 0.98252 | 1057 | 204.9564 | 11.91502 | 0.97932 | 1057 | 201.9347 | 12.40621 | 0.98616 | 1057 | 202.0765 | 12.40516 | 0.98905 |
| 1058 | 201.7318 | 11.71892 | 0.98608 | 1058 | 202.4203 | 14.47635 | 0.98237 | 1058 | 205.158  | 11.87745 | 0.97941 | 1058 | 202.1209 | 12.37705 | 0.98604 | 1058 | 202.2593 | 12.37485 | 0.98908 |
| 1059 | 201.8705 | 11.66989 | 0.9862  | 1059 | 202.5953 | 14.44409 | 0.9824  | 1059 | 205.3238 | 11.85269 | 0.9793  | 1059 | 202.2718 | 12.34205 | 0.98601 | 1059 | 202.4185 | 12.35169 | 0.98912 |
| 1060 | 202.081  | 11.61243 | 0.98616 | 1060 | 202.7764 | 14.41766 | 0.9825  | 1060 | 205.4826 | 11.81863 | 0.97915 | 1060 | 202.4402 | 12.31346 | 0.98606 | 1060 | 202.5739 | 12.32151 | 0.98905 |
| 1061 | 202.2236 | 11.59    | 0.9865  | 1061 | 202.9143 | 14.38744 | 0.98241 | 1061 | 205.6431 | 11.7909  | 0.97922 | 1061 | 202.6221 | 12.2744  | 0.98607 | 1061 | 202.7632 | 12.28946 | 0.98907 |
| 1062 | 202.4085 | 11.54342 | 0.98667 | 1062 | 203.1039 | 14.35512 | 0.98231 | 1062 | 205.833  | 11.75373 | 0.9793  | 1062 | 202.807  | 12.24569 | 0.98598 |      |          |          |         |

|      |          |         |         |      |          |          |         |      |          |         |         |      |          |          |         |      |          |          |         |
|------|----------|---------|---------|------|----------|----------|---------|------|----------|---------|---------|------|----------|----------|---------|------|----------|----------|---------|
| 1124 | 212.9701 | 9.52998 | 0.9843  | 1124 | 213.7667 | 12.35226 | 0.98078 | 1124 | 216.4831 | 9.82272 | 0.97704 | 1124 | 213.4204 | 10.47125 | 0.98478 | 1124 | 213.6116 | 10.42633 | 0.98796 |
| 1125 | 213.1579 | 9.48834 | 0.98437 | 1125 | 213.924  | 12.31592 | 0.98074 | 1125 | 216.6271 | 9.79352 | 0.97696 | 1125 | 213.6048 | 10.43585 | 0.98464 | 1125 | 213.7634 | 10.39615 | 0.98799 |
| 1126 | 213.3249 | 9.45797 | 0.98435 | 1126 | 214.0909 | 12.28783 | 0.98085 | 1126 | 216.7956 | 9.75614 | 0.97678 | 1126 | 213.7884 | 10.40648 | 0.9846  | 1126 | 213.9757 | 10.363   | 0.98796 |
| 1127 | 213.4816 | 9.42927 | 0.98421 | 1127 | 214.2657 | 12.24869 | 0.98087 | 1127 | 216.9759 | 9.71885 | 0.9767  | 1127 | 213.9632 | 10.37899 | 0.98468 | 1127 | 214.1302 | 10.33887 | 0.98786 |
| 1128 | 213.6509 | 9.39122 | 0.98415 | 1128 | 214.4571 | 12.21817 | 0.98075 | 1128 | 217.1645 | 9.68055 | 0.97679 | 1128 | 214.1051 | 10.35526 | 0.98472 | 1128 | 214.3061 | 10.30557 | 0.98779 |
| 1129 | 213.8334 | 9.35636 | 0.98404 | 1129 | 214.6116 | 12.18462 | 0.98065 | 1129 | 217.3114 | 9.64935 | 0.97679 | 1129 | 214.2933 | 10.32117 | 0.98463 | 1129 | 214.4498 | 10.28149 | 0.98785 |
| 1130 | 214.0209 | 9.32441 | 0.9841  | 1130 | 214.7764 | 12.15779 | 0.98068 | 1130 | 217.4838 | 9.61042 | 0.97667 | 1130 | 214.4734 | 10.29576 | 0.98457 | 1130 | 214.6605 | 10.24339 | 0.98786 |
| 1131 | 214.1689 | 9.29671 | 0.98392 | 1131 | 214.9483 | 12.11855 | 0.98069 | 1131 | 217.6652 | 9.5758  | 0.97663 | 1131 | 214.6512 | 10.26605 | 0.98464 | 1131 | 214.8186 | 10.22054 | 0.98776 |
| 1132 | 214.3345 | 9.27098 | 0.98391 | 1132 | 215.1446 | 12.09076 | 0.98058 | 1132 | 217.8465 | 9.53624 | 0.97676 | 1132 | 214.7998 | 10.24556 | 0.98472 | 1132 | 214.9837 | 10.18881 | 0.98769 |
| 1133 | 214.5239 | 9.23837 | 0.98385 | 1133 | 215.2887 | 12.05682 | 0.98045 | 1133 | 218.0001 | 9.50505 | 0.97682 | 1133 | 214.9742 | 10.21164 | 0.98466 | 1133 | 215.1413 | 10.16287 | 0.98775 |
| 1134 | 214.708  | 9.2099  | 0.98389 | 1134 | 215.4653 | 12.02773 | 0.98051 | 1134 | 218.1653 | 9.46629 | 0.97667 | 1134 | 215.1637 | 10.18711 | 0.98451 | 1134 | 215.3488 | 10.12674 | 0.98778 |
| 1135 | 214.8517 | 9.18    | 0.98399 | 1135 | 215.6294 | 11.99236 | 0.98055 | 1135 | 218.3468 | 9.42882 | 0.97659 | 1135 | 215.3327 | 10.1598  | 0.98453 | 1135 | 215.5063 | 10.10238 | 0.9877  |
| 1136 | 215.0221 | 9.15179 | 0.98397 | 1136 | 215.8342 | 11.96145 | 0.98049 | 1136 | 218.5347 | 9.39009 | 0.97665 | 1136 | 215.4802 | 10.13803 | 0.98461 | 1136 | 215.6744 | 10.07062 | 0.98765 |
| 1137 | 215.2024 | 9.11174 | 0.98414 | 1137 | 215.9776 | 11.92872 | 0.98037 | 1137 | 218.6869 | 9.3597  | 0.97668 | 1137 | 215.6596 | 10.10542 | 0.98449 | 1137 | 215.8321 | 10.0452  | 0.98769 |
| 1138 | 215.396  | 9.07966 | 0.98413 | 1138 | 216.1572 | 11.90032 | 0.98039 | 1138 | 218.848  | 9.32113 | 0.97649 | 1138 | 215.8496 | 10.08228 | 0.98437 | 1138 | 216.0293 | 10.00715 | 0.98772 |
| 1139 | 215.5342 | 9.04372 | 0.98409 | 1139 | 216.3128 | 11.86432 | 0.98046 | 1139 | 219.0373 | 9.28417 | 0.97638 | 1139 | 216.0151 | 10.05059 | 0.98442 | 1139 | 216.2021 | 9.9328   | 0.98765 |
| 1140 | 215.71   | 9.01627 | 0.98408 | 1140 | 216.5205 | 11.83369 | 0.9804  | 1140 | 219.2109 | 9.2472  | 0.97644 | 1140 | 216.1714 | 10.03542 | 0.9845  | 1140 | 216.3597 | 9.95002  | 0.98759 |
| 1141 | 215.8872 | 8.97566 | 0.98394 | 1141 | 216.6659 | 11.80013 | 0.98028 | 1141 | 219.3766 | 9.21685 | 0.97647 | 1141 | 216.3423 | 10.0048  | 0.98443 | 1141 | 216.5229 | 9.9238   | 0.98762 |
| 1142 | 216.0772 | 8.94289 | 0.98398 | 1142 | 216.8421 | 11.77176 | 0.98024 | 1142 | 219.5394 | 9.18109 | 0.97632 | 1142 | 216.5342 | 9.98075  | 0.98432 | 1142 | 216.7135 | 9.88558  | 0.98767 |
| 1143 | 216.2093 | 8.91699 | 0.98386 | 1143 | 216.9977 | 11.73514 | 0.98032 | 1143 | 219.7198 | 9.14443 | 0.97621 | 1143 | 216.7019 | 9.95464  | 0.98431 | 1143 | 216.8909 | 9.86074  | 0.98763 |
| 1144 | 216.397  | 8.88174 | 0.9837  | 1144 | 217.2069 | 11.70318 | 0.98028 | 1144 | 219.9012 | 9.10542 | 0.9763  | 1144 | 216.8634 | 9.93488  | 0.98441 | 1144 | 217.038  | 9.82601  | 0.98755 |
| 1145 | 216.5738 | 8.85083 | 0.98377 | 1145 | 217.3476 | 11.67047 | 0.98013 | 1145 | 220.0708 | 9.07479 | 0.97639 | 1145 | 217.0246 | 9.90392  | 0.98435 | 1145 | 217.2098 | 9.79773  | 0.98758 |
| 1146 | 216.7606 | 8.82084 | 0.98392 | 1146 | 217.5332 | 11.63692 | 0.98007 | 1146 | 220.2167 | 9.03826 | 0.97631 | 1146 | 217.2281 | 9.87904  | 0.98421 | 1146 | 217.3969 | 9.7591   | 0.98761 |
| 1147 | 216.8955 | 8.79262 | 0.98395 | 1147 | 217.6831 | 11.60356 | 0.98018 | 1147 | 220.4067 | 9.00075 | 0.97621 | 1147 | 217.3798 | 9.8544   | 0.98414 | 1147 | 217.5814 | 9.731    | 0.98757 |
| 1148 | 217.0773 | 8.76292 | 0.98391 | 1148 | 217.896  | 11.56911 | 0.98014 | 1148 | 220.5844 | 8.96323 | 0.97623 | 1148 | 217.5476 | 9.83248  | 0.98419 | 1148 | 217.7285 | 9.6961   | 0.98748 |
| 1149 | 217.2498 | 8.72964 | 0.98371 | 1149 | 218.0381 | 11.53971 | 0.98002 | 1149 | 220.7568 | 8.9322  | 0.97629 | 1149 | 217.7077 | 9.80287  | 0.98416 | 1149 | 217.9013 | 9.66808  | 0.98746 |
| 1150 | 217.4481 | 8.69354 | 0.9837  | 1150 | 218.2142 | 11.50572 | 0.97993 | 1150 | 220.9039 | 8.89669 | 0.97618 | 1150 | 217.9095 | 9.77814  | 0.98401 | 1150 | 218.0813 | 9.62921  | 0.98753 |
| 1151 | 217.5811 | 8.66772 | 0.9836  | 1151 | 218.369  | 11.4721  | 0.97997 | 1151 | 221.0976 | 8.86137 | 0.97599 | 1151 | 218.0597 | 9.75103  | 0.98395 | 1151 | 218.2753 | 9.59979  | 0.98751 |
| 1152 | 217.7578 | 8.62676 | 0.98321 | 1152 | 218.5851 | 11.43543 | 0.97999 | 1152 | 221.2663 | 8.82512 | 0.97595 | 1152 | 218.2376 | 9.72718  | 0.98402 | 1152 | 218.4124 | 9.56799  | 0.98742 |
| 1153 | 217.9454 | 8.58877 | 0.98296 | 1153 | 218.7266 | 11.40647 | 0.97987 | 1153 | 221.4465 | 8.79306 | 0.97601 | 1153 | 218.3838 | 9.69894  | 0.98404 | 1153 | 218.5913 | 9.53663  | 0.98742 |
| 1154 | 218.1216 | 8.5501  | 0.98272 | 1154 | 218.9026 | 11.37125 | 0.97981 | 1154 | 221.597  | 8.75994 | 0.976   | 1154 | 218.5968 | 9.67074  | 0.98393 | 1154 | 218.7679 | 9.49829  | 0.98745 |
| 1155 | 218.2701 | 8.52776 | 0.98266 | 1155 | 219.0608 | 11.33728 | 0.97989 | 1155 | 221.7823 | 8.72294 | 0.97585 | 1155 | 218.7523 | 9.64418  | 0.98387 | 1155 | 218.9596 | 9.46891  | 0.98744 |
| 1156 | 218.4369 | 8.49253 | 0.98254 | 1156 | 219.2648 | 11.30055 | 0.97996 | 1156 | 221.9574 | 8.68761 | 0.97581 | 1156 | 218.9254 | 9.62004  | 0.98397 | 1156 | 219.0996 | 9.43462  | 0.98736 |
| 1157 | 218.6191 | 8.45378 | 0.98253 | 1157 | 219.4144 | 11.27292 | 0.97987 | 1157 | 222.1398 | 8.65287 | 0.9759  | 1157 | 219.0762 | 9.59066  | 0.98401 | 1157 | 219.281  | 9.40381  | 0.98733 |
| 1158 | 218.7999 | 8.41919 | 0.98255 | 1158 | 219.5838 | 11.23655 | 0.97975 | 1158 | 222.2802 | 8.6278  | 0.97589 | 1158 | 219.2889 | 9.56379  | 0.98392 | 1158 | 219.4486 | 9.36722  | 0.98741 |
| 1159 | 218.9502 | 8.3925  | 0.9827  | 1159 | 219.746  | 11.20336 | 0.97977 | 1159 | 222.4676 | 8.5894  | 0.97581 | 1159 | 219.4347 | 9.53717  | 0.98384 | 1159 | 219.6601 | 9.33492  | 0.98744 |
| 1160 | 219.1188 | 8.36554 | 0.98263 | 1160 | 219.9492 | 11.1645  | 0.97982 | 1160 | 222.6433 | 8.5592  | 0.97563 | 1160 | 219.6146 | 9.51366  | 0.98386 | 1160 | 219.787  | 9.30353  | 0.98738 |
| 1161 | 219.305  | 8.31881 | 0.98261 | 1161 | 220.1104 | 11.13654 | 0.97977 | 1161 | 222.8202 | 8.52491 | 0.97573 | 1161 | 219.7569 | 9.48593  | 0.98396 | 1161 | 219.9657 | 9.27224  | 0.98731 |
| 1162 | 219.4834 | 8.27059 | 0.9827  | 1162 | 220.2695 | 11.09806 | 0.97955 | 1162 | 222.9738 | 8.49435 | 0.97575 | 1162 | 219.9222 | 9.45833  | 0.98389 | 1162 | 220.1399 | 9.23588  | 0.98736 |
| 1163 | 219.6329 | 8.24194 | 0.98268 | 1163 | 220.4337 | 11.06396 | 0.97954 | 1163 | 223.1497 | 8.45416 | 0.97568 | 1163 | 220.121  | 9.4336   | 0.98378 | 1163 | 220.3426 | 9.20237  | 0.98738 |
| 1164 | 219.7975 | 8.20153 | 0.98255 | 1164 | 220.6315 | 11.02623 | 0.97962 | 1164 | 223.3131 | 8.42032 | 0.97566 | 1164 | 220.2988 | 9.4071   | 0.98377 | 1164 | 220.4753 | 9.17282  | 0.98727 |
| 1165 | 219.988  | 8.15985 | 0.98255 | 1165 | 220.7956 | 10.99612 | 0.97955 | 1165 | 223.5052 | 8.3837  | 0.97562 | 1165 | 220.4404 | 9.38187  | 0.98385 | 1165 | 220.6602 | 9.13956  | 0.98717 |
| 1166 | 220.1568 | 8.11038 | 0.98254 | 1166 | 220.955  | 10.96561 | 0.97943 | 1166 | 223.6603 | 8.35099 | 0.97572 | 1166 | 220.6615 | 9.34891  | 0.98381 | 1166 | 220.8225 | 9.10504  | 0.9872  |
| 1167 | 220.3202 | 8.08098 | 0.98273 | 1167 | 221.1222 | 10.92169 | 0.97942 | 1167 | 223.8377 | 8.30845 | 0.97553 | 1167 | 220.8076 | 9.32721  | 0.98367 | 1167 | 221.0269 | 9.06719  | 0.98724 |
| 1168 | 220.4758 | 8.04513 | 0.98253 | 1168 | 221.3157 | 10.88143 | 0.97956 | 1168 | 224.0275 | 8.27408 | 0.97539 | 1168 | 220.981  | 9.29673  | 0.98366 | 1168 | 221.1676 | 9.0362   | 0.98717 |
| 1169 | 220.66   | 8.01092 | 0.98228 | 1169 | 221.4901 | 10.8515  | 0.97955 | 1169 | 224.1976 | 8.23749 | 0.97545 | 1169 | 221.1336 | 9.27108  | 0.98373 | 1169 | 221.3441 | 9.00032  | 0.98709 |
| 1170 | 220.8401 | 7.96578 | 0.98221 | 1170 | 221.6379 | 10.81416 | 0.97946 | 1170 | 224.3498 | 8.20657 | 0.97551 | 1170 | 221.3431 | 9.23747  | 0.98375 | 1170 | 221.5128 | 8.96393  | 0.98712 |
| 1171 | 221.0062 | 7.93599 | 0.98225 | 1171 | 221.8092 | 10.77683 | 0.97942 | 1171 | 224.5164 | 8.16573 | 0.97543 | 1171 | 221.4975 | 9.21198  | 0.98364 | 1171 | 221.7151 | 8.92537  | 0.9872  |
| 1172 | 221.1359 | 7.88985 | 0.98209 | 1172 | 222.0016 | 10.73639 | 0.9795  | 1172 | 224.7105 | 8.13063 | 0.97528 | 1172 | 221.6681 | 9.17757  | 0.98357 | 1172 | 221.86   | 8.89564  | 0.98717 |
| 1173 | 221.3361 | 7.83947 | 0.98182 | 1173 | 222.1745 | 10.70594 | 0.97949 | 1173 | 224.8772 | 8.09351 | 0.97534 | 1173 | 221.8163 | 9.15037  | 0.98365 | 1173 | 222.0327 | 8.85956  | 0.98707 |
| 1174 | 221.5173 | 7.78927 | 0.98189 | 1174 | 222.3249 | 10.6662  | 0.97934 | 1174 | 225.0464 | 8.06376 | 0.9754  | 1174 | 222.0258 | 9.11409  | 0.98367 | 1174 | 222.2086 | 8.82374  | 0.98708 |
| 1175 | 221.6781 | 7.73912 | 0.98202 | 1175 | 222.5033 | 10.62992 | 0.97925 | 1175 | 225.2194 | 8.02457 | 0.97532 | 1175 | 222.1863 | 9.08845  | 0.98352 | 1175 | 222.403  | 8.78692  | 0.98713 |
| 1176 | 221.841  | 7.68492 | 0.98193 | 1176 | 222.68   | 10.58705 | 0.97932 | 1176 | 225.3989 | 7.      |         |      |          |          |         |      |          |          |         |

|      |          |         |         |      |          |         |         |      |          |         |         |      |          |         |         |      |          |         |         |
|------|----------|---------|---------|------|----------|---------|---------|------|----------|---------|---------|------|----------|---------|---------|------|----------|---------|---------|
| 1237 | 232.2338 | 5.40182 | 0.97983 | 1237 | 233.1526 | 8.36989 | 0.97721 | 1237 | 235.9083 | 5.92235 | 0.97264 | 1237 | 232.8028 | 7.35114 | 0.98194 | 1237 | 233.0316 | 6.56631 | 0.98579 |
| 1238 | 232.4233 | 5.35904 | 0.97984 | 1238 | 233.3324 | 8.32845 | 0.97722 | 1238 | 236.062  | 5.89553 | 0.9725  | 1238 | 232.9954 | 7.21654 | 0.98177 | 1238 | 233.1808 | 6.52896 | 0.98582 |
| 1239 | 232.591  | 5.32679 | 0.9797  | 1239 | 233.4766 | 8.29603 | 0.9773  | 1239 | 236.2321 | 5.85872 | 0.97242 | 1239 | 233.1663 | 7.28196 | 0.98173 | 1239 | 233.3857 | 6.48753 | 0.98574 |
| 1240 | 232.7575 | 5.28667 | 0.97956 | 1240 | 233.6548 | 8.25163 | 0.97724 | 1240 | 236.3842 | 5.82816 | 0.97255 | 1240 | 233.3432 | 7.25456 | 0.98176 | 1240 | 233.5476 | 6.44844 | 0.98565 |
| 1241 | 232.9159 | 5.24673 | 0.97958 | 1241 | 233.8427 | 8.21634 | 0.97709 | 1241 | 236.5809 | 5.78552 | 0.9726  | 1241 | 233.4867 | 7.22312 | 0.98172 | 1241 | 233.7184 | 6.41427 | 0.98571 |
| 1242 | 233.107  | 5.19937 | 0.97959 | 1242 | 234.0061 | 8.17566 | 0.97711 | 1242 | 236.7515 | 5.75334 | 0.97246 | 1242 | 233.6824 | 7.18838 | 0.9816  | 1242 | 233.8616 | 6.3797  | 0.98574 |
| 1243 | 233.2824 | 5.16407 | 0.97943 | 1243 | 234.1665 | 8.14259 | 0.97724 | 1243 | 236.9152 | 5.71237 | 0.97238 | 1243 | 233.8558 | 7.15427 | 0.98157 | 1243 | 234.0691 | 6.33732 | 0.9857  |
| 1244 | 233.4405 | 5.12323 | 0.97935 | 1244 | 234.3399 | 8.09915 | 0.97718 | 1244 | 237.0684 | 5.67869 | 0.97247 | 1244 | 234.0289 | 7.12734 | 0.98165 | 1244 | 234.2278 | 6.30144 | 0.98563 |
| 1245 | 233.6091 | 5.08338 | 0.97934 | 1245 | 234.5311 | 8.0654  | 0.97703 | 1245 | 237.2408 | 5.63088 | 0.97253 | 1245 | 234.1716 | 7.09723 | 0.98169 | 1245 | 234.4036 | 6.26542 | 0.98565 |
| 1246 | 233.7842 | 5.04534 | 0.97941 | 1246 | 234.6917 | 8.02895 | 0.97697 | 1246 | 237.4149 | 5.59392 | 0.97238 | 1246 | 234.3686 | 7.06335 | 0.9816  | 1246 | 234.5501 | 6.2302  | 0.9857  |
| 1247 | 233.9735 | 5.01171 | 0.97937 | 1247 | 234.8538 | 7.9972  | 0.97707 | 1247 | 237.5929 | 5.55089 | 0.97227 | 1247 | 234.5315 | 7.03452 | 0.98151 | 1247 | 234.7542 | 6.18918 | 0.98563 |
| 1248 | 234.1297 | 4.97351 | 0.97923 | 1248 | 235.0153 | 7.95618 | 0.97703 | 1248 | 237.7584 | 5.51248 | 0.97237 | 1248 | 234.7111 | 7.00213 | 0.98156 | 1248 | 234.9167 | 6.15328 | 0.98557 |
| 1249 | 234.2881 | 4.94271 | 0.97919 | 1249 | 235.2163 | 7.92008 | 0.97686 | 1249 | 237.9396 | 5.46431 | 0.97236 | 1249 | 234.8536 | 6.97578 | 0.98158 | 1249 | 235.0902 | 6.11512 | 0.98556 |
| 1250 | 234.4626 | 4.89983 | 0.97918 | 1250 | 235.3727 | 7.88615 | 0.97679 | 1250 | 238.1223 | 5.42503 | 0.97218 | 1250 | 235.0439 | 6.93864 | 0.98146 | 1250 | 235.2324 | 6.08294 | 0.98562 |
| 1251 | 234.6561 | 4.86422 | 0.9792  | 1251 | 235.5409 | 7.85231 | 0.97687 | 1251 | 238.2802 | 5.38044 | 0.97203 | 1251 | 235.2196 | 6.90855 | 0.98137 | 1251 | 235.435  | 6.03997 | 0.98555 |
| 1252 | 234.8034 | 4.82352 | 0.97909 | 1252 | 235.7011 | 7.80857 | 0.97686 | 1252 | 238.4444 | 5.3432  | 0.97206 | 1252 | 235.3995 | 6.87601 | 0.98139 | 1252 | 235.6026 | 6.00649 | 0.98547 |
| 1253 | 234.9721 | 4.78886 | 0.97911 | 1253 | 235.9019 | 7.77432 | 0.97674 | 1253 | 238.6151 | 5.29248 | 0.97208 | 1253 | 235.5381 | 6.84831 | 0.98141 | 1253 | 235.7698 | 5.96927 | 0.98546 |
| 1254 | 235.1387 | 4.74615 | 0.9791  | 1254 | 236.0591 | 7.73619 | 0.97665 | 1254 | 238.8093 | 5.25285 | 0.9719  | 1254 | 235.7036 | 6.80927 | 0.98132 | 1254 | 235.9206 | 5.93798 | 0.98552 |
| 1255 | 235.3285 | 4.70971 | 0.97906 | 1255 | 236.2266 | 7.7033  | 0.9767  | 1255 | 238.9573 | 5.20861 | 0.97175 | 1255 | 235.9103 | 6.78025 | 0.98121 | 1255 | 236.115  | 5.89612 | 0.98547 |
| 1256 | 235.5187 | 4.66922 | 0.97896 | 1256 | 236.3814 | 7.66206 | 0.97669 | 1256 | 239.1257 | 5.16772 | 0.97178 | 1256 | 236.0757 | 6.74499 | 0.98128 | 1256 | 236.2873 | 5.86312 | 0.98537 |
| 1257 | 235.6572 | 4.63521 | 0.97886 | 1257 | 236.5916 | 7.62287 | 0.97654 | 1257 | 239.297  | 5.11745 | 0.97183 | 1257 | 236.2287 | 6.71785 | 0.98136 | 1257 | 236.4534 | 5.82627 | 0.98534 |
| 1258 | 235.8154 | 4.59157 | 0.97885 | 1258 | 236.7482 | 7.58593 | 0.97645 | 1258 | 239.4911 | 5.07866 | 0.97172 | 1258 | 236.4095 | 6.67747 | 0.98129 | 1258 | 236.6097 | 5.79805 | 0.98537 |
| 1259 | 236.0244 | 4.55303 | 0.97873 | 1259 | 236.915  | 7.55135 | 0.9765  | 1259 | 239.6385 | 5.03414 | 0.97154 | 1259 | 236.59   | 6.647   | 0.98121 | 1259 | 236.7994 | 5.75698 | 0.98537 |
| 1260 | 236.1691 | 4.51255 | 0.97859 | 1260 | 237.0649 | 7.5089  | 0.97652 | 1260 | 239.8151 | 4.99485 | 0.97153 | 1260 | 236.7564 | 6.60996 | 0.98125 | 1260 | 236.9844 | 5.72687 | 0.98526 |
| 1261 | 236.3414 | 4.47506 | 0.97864 | 1261 | 237.2765 | 7.46956 | 0.97642 | 1261 | 239.9707 | 4.94654 | 0.97163 | 1261 | 236.9109 | 6.58371 | 0.98133 | 1261 | 237.1439 | 5.69176 | 0.98522 |
| 1262 | 236.4989 | 4.42745 | 0.97867 | 1262 | 237.4249 | 7.43111 | 0.9763  | 1262 | 240.1736 | 4.90559 | 0.97155 | 1262 | 237.0855 | 6.54326 | 0.98129 | 1262 | 237.2999 | 5.66361 | 0.98527 |
| 1263 | 236.7087 | 4.38828 | 0.97869 | 1263 | 237.6036 | 7.39159 | 0.97633 | 1263 | 240.3239 | 4.86057 | 0.97137 | 1263 | 237.2784 | 6.50997 | 0.98112 | 1263 | 237.4831 | 5.62304 | 0.98527 |
| 1264 | 236.8484 | 4.35032 | 0.97857 | 1264 | 237.7516 | 7.35353 | 0.97637 | 1264 | 240.4981 | 4.82024 | 0.97133 | 1264 | 237.4395 | 6.47505 | 0.98108 | 1264 | 237.6675 | 5.5935  | 0.98516 |
| 1265 | 237.0313 | 4.31092 | 0.97853 | 1265 | 237.9631 | 7.31083 | 0.97625 | 1265 | 240.6549 | 4.77662 | 0.97135 | 1265 | 237.5995 | 6.44609 | 0.98116 | 1265 | 237.8218 | 5.55721 | 0.9851  |
| 1266 | 237.1754 | 4.2687  | 0.97858 | 1266 | 238.1137 | 7.27452 | 0.9761  | 1266 | 240.8664 | 4.72958 | 0.97127 | 1266 | 237.7718 | 6.40606 | 0.98115 | 1266 | 237.9935 | 5.52797 | 0.98511 |
| 1267 | 237.3393 | 4.22669 | 0.97853 | 1267 | 238.2879 | 7.23613 | 0.97609 | 1267 | 241.1003 | 4.68743 | 0.97106 | 1267 | 237.9607 | 6.3749  | 0.98098 | 1267 | 238.1594 | 5.49824 | 0.98512 |
| 1268 | 237.5294 | 4.19298 | 0.97841 | 1268 | 238.4311 | 7.19916 | 0.97614 | 1268 | 241.3236 | 4.64441 | 0.97098 | 1268 | 238.118  | 6.33792 | 0.98095 | 1268 | 238.3334 | 5.45861 | 0.98502 |
| 1269 | 237.7054 | 4.15716 | 0.9783  | 1269 | 238.6481 | 7.15648 | 0.97608 | 1269 | 241.3394 | 4.59982 | 0.97104 | 1269 | 238.2881 | 6.30631 | 0.98102 | 1269 | 238.5046 | 5.42313 | 0.98493 |
| 1270 | 237.8654 | 4.11807 | 0.97831 | 1270 | 238.8032 | 7.12169 | 0.97593 | 1270 | 241.5436 | 4.55555 | 0.97099 | 1270 | 238.4498 | 6.26607 | 0.98101 | 1270 | 238.6749 | 5.39269 | 0.98495 |
| 1271 | 238.0774 | 4.06801 | 0.9783  | 1271 | 238.9735 | 7.08126 | 0.97586 | 1271 | 241.6877 | 4.51688 | 0.97085 | 1271 | 238.649  | 6.23257 | 0.98087 | 1271 | 238.8467 | 5.35078 | 0.98496 |
| 1272 | 238.2165 | 4.03599 | 0.97818 | 1272 | 239.1221 | 7.04582 | 0.97591 | 1272 | 241.8688 | 4.47238 | 0.97077 | 1272 | 238.8052 | 6.19417 | 0.98078 | 1272 | 239.0496 | 5.31853 | 0.98488 |
| 1273 | 238.3944 | 3.99285 | 0.978   | 1273 | 239.3254 | 7.00382 | 0.97585 | 1273 | 242.0134 | 4.42961 | 0.97086 | 1273 | 238.9703 | 6.16204 | 0.98083 | 1273 | 239.1899 | 5.28116 | 0.98477 |
| 1274 | 238.5471 | 3.95321 | 0.97794 | 1274 | 239.4867 | 6.96959 | 0.97567 | 1274 | 242.2253 | 4.38232 | 0.97085 | 1274 | 239.1303 | 6.12119 | 0.98087 | 1274 | 239.3633 | 5.24834 | 0.98477 |
| 1275 | 238.7461 | 3.90792 | 0.97794 | 1275 | 239.6604 | 6.92648 | 0.97561 | 1275 | 242.3796 | 4.34478 | 0.97067 | 1275 | 239.3349 | 6.08614 | 0.98076 | 1275 | 239.5237 | 5.20706 | 0.98484 |
| 1276 | 238.9031 | 3.87158 | 0.97776 | 1276 | 239.8061 | 6.89428 | 0.97566 | 1276 | 242.547  | 4.29797 | 0.97056 | 1276 | 239.4842 | 6.04923 | 0.9807  | 1276 | 239.7248 | 5.16894 | 0.98476 |
| 1277 | 239.0689 | 3.82692 | 0.97768 | 1277 | 240.0082 | 6.84826 | 0.97565 | 1277 | 242.7077 | 4.25461 | 0.97059 | 1277 | 239.6594 | 6.01562 | 0.98077 | 1277 | 239.869  | 5.1305  | 0.98465 |
| 1278 | 239.225  | 3.78279 | 0.97765 | 1278 | 240.1784 | 6.81325 | 0.97547 | 1278 | 242.9116 | 4.20638 | 0.97064 | 1278 | 239.8152 | 5.97658 | 0.98082 | 1278 | 240.0495 | 5.09413 | 0.98463 |
| 1279 | 239.4311 | 3.73421 | 0.9777  | 1279 | 240.3355 | 6.77319 | 0.97541 | 1279 | 243.0667 | 4.16598 | 0.97047 | 1279 | 240.0199 | 5.94216 | 0.98075 | 1279 | 240.198  | 5.05107 | 0.98468 |
| 1280 | 239.5884 | 3.69784 | 0.97768 | 1280 | 240.494  | 6.74093 | 0.97549 | 1280 | 243.2324 | 4.11921 | 0.97035 | 1280 | 240.1705 | 5.90598 | 0.98064 | 1280 | 240.4092 | 5.01294 | 0.98465 |
| 1281 | 239.7473 | 3.6496  | 0.97752 | 1281 | 240.6975 | 6.69615 | 0.97548 | 1281 | 243.3892 | 4.07742 | 0.97034 | 1281 | 240.3471 | 5.87437 | 0.98063 | 1281 | 240.5512 | 4.97342 | 0.98453 |
| 1282 | 239.9079 | 3.60878 | 0.97757 | 1282 | 240.8642 | 6.66208 | 0.97536 | 1282 | 243.5888 | 4.02821 | 0.9704  | 1282 | 240.494  | 5.83694 | 0.98065 | 1282 | 240.7285 | 4.93588 | 0.98453 |
| 1283 | 240.1092 | 3.56289 | 0.97764 | 1283 | 241.0264 | 6.61964 | 0.97526 | 1283 | 243.7523 | 3.98835 | 0.97025 | 1283 | 240.7064 | 5.80312 | 0.98056 | 1283 | 240.8847 | 4.89097 | 0.9846  |
| 1284 | 240.2737 | 3.5285  | 0.97752 | 1284 | 241.1886 | 6.58807 | 0.97531 | 1284 | 243.9076 | 3.94395 | 0.97007 | 1284 | 240.8486 | 5.76868 | 0.98045 | 1284 | 241.0952 | 4.85211 | 0.98455 |
| 1285 | 240.4356 | 3.48214 | 0.97746 | 1285 | 241.3724 | 6.54144 | 0.97533 | 1285 | 244.0724 | 3.90308 | 0.97003 | 1285 | 241.0289 | 5.73502 | 0.98044 | 1285 | 241.314  | 4.81377 | 0.98445 |
| 1286 | 240.5954 | 3.44237 | 0.97738 | 1286 | 241.558  | 6.5063  | 0.97515 | 1286 | 244.2636 | 3.85473 | 0.97009 | 1286 | 241.1804 | 5.69698 | 0.98048 | 1286 | 241.4152 | 4.7718  | 0.98442 |
| 1287 | 240.7873 | 3.395   | 0.97735 | 1287 | 241.715  | 6.46363 | 0.97503 | 1287 | 244.4333 | 3.81681 | 0.97001 | 1287 | 241.3873 | 5.66112 | 0.98045 | 1287 | 241.5671 | 4.73006 | 0.98447 |
| 1288 | 240.9611 | 3.35799 | 0.97721 | 1288 | 241.877  | 6.42892 | 0.975   | 1288 | 244.5896 | 3.76983 | 0.96983 | 1288 | 241.5343 | 5.62574 | 0.98034 | 1288 | 241.7762 | 4.68606 | 0.98449 |
| 1289 | 241.1057 | 3.30996 | 0.977   | 1289 | 242.0556 | 6.38432 | 0.97499 | 1289 | 244.7602 | 3.72872 | 0.96982 | 1289 | 241.7177 | 5.58815 | 0.98033 | 1289 |          |         |         |

|      |          |          |         |      |          |         |         |      |          |          |         |      |          |         |         |      |          |          |         |
|------|----------|----------|---------|------|----------|---------|---------|------|----------|----------|---------|------|----------|---------|---------|------|----------|----------|---------|
| 1350 | 251.5185 | 0.67645  | 0.97341 | 1350 | 252.5017 | 3.79532 | 0.97112 | 1350 | 255.2148 | 1.20996  | 0.96507 | 1350 | 252.1334 | 3.24498 | 0.97791 | 1350 | 252.2591 | 1.86379  | 0.9817  |
| 1351 | 251.6999 | 0.62667  | 0.9732  | 1351 | 252.69   | 3.75068 | 0.9712  | 1351 | 255.3964 | 1.16676  | 0.96492 | 1351 | 252.3245 | 3.2047  | 0.97777 | 1351 | 252.4064 | 1.82077  | 0.98161 |
| 1352 | 251.8766 | 0.58027  | 0.97313 | 1352 | 252.8324 | 3.70946 | 0.97114 | 1352 | 255.5813 | 1.12559  | 0.96495 | 1352 | 252.5012 | 3.16058 | 0.97773 | 1352 | 252.5956 | 1.77599  | 0.98151 |
| 1353 | 252.0566 | 0.53172  | 0.97313 | 1353 | 253.0134 | 3.66075 | 0.97093 | 1353 | 255.7293 | 1.08787  | 0.96491 | 1353 | 252.6638 | 3.12574 | 0.97778 | 1353 | 252.7705 | 1.73269  | 0.98148 |
| 1354 | 252.2049 | 0.49349  | 0.97316 | 1354 | 253.1908 | 3.61349 | 0.97084 | 1354 | 255.896  | 1.04356  | 0.96469 | 1354 | 252.8181 | 3.08284 | 0.97769 | 1354 | 252.9356 | 1.69636  | 0.98152 |
| 1355 | 252.3842 | 0.44957  | 0.97298 | 1355 | 253.3782 | 3.56692 | 0.97086 | 1355 | 256.0833 | 0.99873  | 0.96458 | 1355 | 253.0159 | 3.04099 | 0.97752 | 1355 | 253.0899 | 1.65306  | 0.98141 |
| 1356 | 252.5674 | 0.39306  | 0.97286 | 1356 | 253.5242 | 3.52705 | 0.97077 | 1356 | 256.2615 | 0.95568  | 0.96464 | 1356 | 253.1793 | 2.99873 | 0.97749 | 1356 | 253.281  | 1.61133  | 0.98129 |
| 1357 | 252.7496 | 0.35053  | 0.97286 | 1357 | 253.6903 | 3.47918 | 0.97056 | 1357 | 256.4158 | 0.91896  | 0.96463 | 1357 | 253.351  | 2.96285 | 0.97751 | 1357 | 253.4497 | 1.56783  | 0.98124 |
| 1358 | 252.89   | 0.30966  | 0.97278 | 1358 | 253.8763 | 3.43127 | 0.97041 | 1358 | 256.5797 | 0.87478  | 0.96445 | 1358 | 253.5002 | 2.92185 | 0.97739 | 1358 | 253.6233 | 1.53108  | 0.98124 |
| 1359 | 253.0677 | 0.26139  | 0.9726  | 1359 | 254.0554 | 3.38612 | 0.9704  | 1359 | 256.7647 | 0.831    | 0.96434 | 1359 | 253.6901 | 2.87629 | 0.97722 | 1359 | 253.7652 | 1.49256  | 0.98117 |
| 1360 | 253.2534 | 0.21673  | 0.97238 | 1360 | 254.2053 | 3.34785 | 0.97037 | 1360 | 256.9487 | 0.78725  | 0.96432 | 1360 | 253.8632 | 2.83371 | 0.97713 | 1360 | 253.9532 | 1.44862  | 0.98103 |
| 1361 | 253.425  | 0.1702   | 0.9723  | 1361 | 254.3746 | 3.30051 | 0.97016 | 1361 | 257.1079 | 0.75254  | 0.96428 | 1361 | 254.0332 | 2.7953  | 0.97718 | 1361 | 254.1255 | 1.40553  | 0.98098 |
| 1362 | 253.5769 | 0.13217  | 0.97231 | 1362 | 254.5579 | 3.25535 | 0.97004 | 1362 | 257.2606 | 0.70984  | 0.9641  | 1362 | 254.1797 | 2.75346 | 0.97714 | 1362 | 254.2958 | 1.37042  | 0.981   |
| 1363 | 253.7407 | 0.08134  | 0.97217 | 1363 | 254.7342 | 3.20818 | 0.97001 | 1363 | 257.4509 | 0.66458  | 0.96392 | 1363 | 254.3793 | 2.7083  | 0.97703 | 1363 | 254.4391 | 1.33058  | 0.98097 |
| 1364 | 253.9269 | 0.0332   | 0.97215 | 1364 | 254.8918 | 3.17041 | 0.97    | 1364 | 257.6288 | 0.61792  | 0.96391 | 1364 | 254.5405 | 2.66399 | 0.97696 | 1364 | 254.634  | 1.28608  | 0.98082 |
| 1365 | 254.105  | -0.01644 | 0.97212 | 1365 | 255.0541 | 3.12515 | 0.96982 | 1365 | 257.7926 | 0.57981  | 0.96391 | 1365 | 254.7157 | 2.62532 | 0.97701 | 1365 | 254.7956 | 1.24483  | 0.98076 |
| 1366 | 254.2605 | -0.05913 | 0.97212 | 1366 | 255.2429 | 3.07928 | 0.9697  | 1366 | 257.9443 | 0.53486  | 0.96369 | 1366 | 254.8601 | 2.58382 | 0.977   | 1366 | 254.9728 | 1.20175  | 0.98077 |
| 1367 | 254.4232 | -0.11005 | 0.97208 | 1367 | 255.4217 | 3.03286 | 0.96966 | 1367 | 258.1405 | 0.48836  | 0.96351 | 1367 | 255.055  | 2.53607 | 0.97686 | 1367 | 255.1216 | 1.16145  | 0.98075 |
| 1368 | 254.617  | -0.1587  | 0.97193 | 1368 | 255.576  | 2.99562 | 0.96968 | 1368 | 258.3074 | 0.44211  | 0.96343 | 1368 | 255.2226 | 2.49165 | 0.97674 | 1368 | 255.3055 | 1.11239  | 0.98058 |
| 1369 | 254.7878 | -0.2055  | 0.97191 | 1369 | 255.7341 | 2.95071 | 0.96953 | 1369 | 258.4801 | 0.40039  | 0.96342 | 1369 | 255.3965 | 2.45006 | 0.97676 | 1369 | 255.4807 | 1.07008  | 0.98048 |
| 1370 | 254.9415 | -0.24852 | 0.97181 | 1370 | 255.928  | 2.90486 | 0.96939 | 1370 | 258.6282 | 0.35454  | 0.96321 | 1370 | 255.5378 | 2.40936 | 0.97676 | 1370 | 255.6562 | 1.02172  | 0.98047 |
| 1371 | 255.1026 | -0.29809 | 0.97175 | 1371 | 256.0987 | 2.85782 | 0.96935 | 1371 | 258.8164 | 0.3055   | 0.96296 | 1371 | 255.7355 | 2.3591  | 0.97661 | 1371 | 255.7976 | 0.982    | 0.98045 |
| 1372 | 255.2952 | -0.34634 | 0.97168 | 1372 | 256.2667 | 2.81812 | 0.96934 | 1372 | 258.9949 | 0.25672  | 0.96284 | 1372 | 255.9047 | 2.31591 | 0.97651 | 1372 | 255.9808 | 0.9306   | 0.98032 |
| 1373 | 255.4646 | -0.38981 | 0.97164 | 1373 | 256.418  | 2.77307 | 0.96922 | 1373 | 259.1672 | 0.21398  | 0.96284 | 1373 | 256.0771 | 2.27176 | 0.97652 | 1373 | 256.1589 | 0.88688  | 0.98024 |
| 1374 | 255.628  | -0.43586 | 0.97162 | 1374 | 256.6097 | 2.72628 | 0.96904 | 1374 | 259.3107 | 0.16492  | 0.96269 | 1374 | 256.2255 | 2.23248 | 0.97654 | 1374 | 256.3265 | 0.84047  | 0.98023 |
| 1375 | 255.7781 | -0.48536 | 0.97159 | 1375 | 256.7831 | 2.67976 | 0.96895 | 1375 | 259.5059 | 0.11494  | 0.96241 | 1375 | 256.4159 | 2.18221 | 0.97642 | 1375 | 256.4785 | 0.79933  | 0.98021 |
| 1376 | 255.9747 | -0.53636 | 0.97141 | 1376 | 256.9554 | 2.63867 | 0.96894 | 1376 | 259.6742 | 0.06458  | 0.96229 | 1376 | 256.5841 | 2.13926 | 0.97628 | 1376 | 256.6556 | 0.74793  | 0.98013 |
| 1377 | 256.148  | -0.58491 | 0.97135 | 1377 | 257.1011 | 2.59453 | 0.96882 | 1377 | 259.8519 | 0.0175   | 0.96235 | 1377 | 256.7578 | 2.09432 | 0.97624 | 1377 | 256.836  | 0.70513  | 0.97998 |
| 1378 | 256.3112 | -0.62817 | 0.97131 | 1378 | 257.298  | 2.54753 | 0.96859 | 1378 | 259.9981 | -0.03223 | 0.96228 | 1378 | 256.9045 | 2.0551  | 0.97632 | 1378 | 257.0053 | 0.65997  | 0.97993 |
| 1379 | 256.4626 | -0.68034 | 0.97119 | 1379 | 257.4676 | 2.50088 | 0.96847 | 1379 | 260.1889 | -0.08231 | 0.96203 | 1379 | 257.0893 | 2.00287 | 0.9762  | 1379 | 257.1573 | 0.6186   | 0.97991 |
| 1380 | 256.6607 | -0.73006 | 0.97101 | 1380 | 257.6432 | 2.45912 | 0.9684  | 1380 | 260.3558 | -0.13193 | 0.96188 | 1380 | 257.2713 | 1.96045 | 0.97603 | 1380 | 257.333  | 0.56979  | 0.97978 |
| 1381 | 256.8255 | -0.78212 | 0.97085 | 1381 | 257.7885 | 2.41396 | 0.96828 | 1381 | 260.5373 | -0.18258 | 0.96191 | 1381 | 257.4353 | 1.91693 | 0.97599 | 1381 | 257.5273 | 0.52507  | 0.97963 |
| 1382 | 256.9969 | -0.82789 | 0.97084 | 1382 | 257.9784 | 2.36656 | 0.96805 | 1382 | 260.6791 | -0.22761 | 0.9619  | 1382 | 257.5879 | 1.87813 | 0.97607 | 1382 | 257.6847 | 0.48125  | 0.97959 |
| 1383 | 257.1467 | -0.87767 | 0.97076 | 1383 | 258.1472 | 2.32072 | 0.96793 | 1383 | 260.8655 | -0.28226 | 0.96165 | 1383 | 257.7115 | 1.8274  | 0.97601 | 1383 | 257.8437 | 0.44064  | 0.97958 |
| 1384 | 257.3402 | -0.92987 | 0.97051 | 1384 | 258.3268 | 2.27553 | 0.96792 | 1384 | 261.0473 | -0.3302  | 0.96147 | 1384 | 257.9529 | 1.78653 | 0.97584 | 1384 | 258.0074 | 0.38977  | 0.9795  |
| 1385 | 257.5084 | -0.97683 | 0.97039 | 1385 | 258.4693 | 2.23454 | 0.96789 | 1385 | 261.2195 | -0.37956 | 0.96146 | 1385 | 258.1157 | 1.74004 | 0.97577 | 1385 | 258.2044 | 0.34583  | 0.97937 |
| 1386 | 257.6793 | -1.02306 | 0.97036 | 1386 | 258.6624 | 2.18386 | 0.96768 | 1386 | 261.3649 | -0.42475 | 0.96145 | 1386 | 258.2757 | 1.70107 | 0.9758  | 1386 | 258.3601 | 0.2978   | 0.97929 |
| 1387 | 257.8176 | -1.07175 | 0.97034 | 1387 | 258.8358 | 2.14084 | 0.96756 | 1387 | 261.5476 | -0.47492 | 0.96123 | 1387 | 258.4478 | 1.65117 | 0.97573 | 1387 | 258.5301 | 0.25502  | 0.97928 |
| 1388 | 258.0209 | -1.12814 | 0.97022 | 1388 | 259.0074 | 2.0952  | 0.96755 | 1388 | 261.7276 | -0.52645 | 0.96102 | 1388 | 258.6402 | 1.60801 | 0.97554 | 1388 | 258.6816 | 0.20552  | 0.97924 |
| 1389 | 258.1928 | -1.17601 | 0.97008 | 1389 | 259.1548 | 2.05356 | 0.96752 | 1389 | 261.9025 | -0.57772 | 0.96094 | 1389 | 258.8015 | 1.56156 | 0.97542 | 1389 | 258.882  | 0.16018  | 0.97909 |
| 1390 | 258.3604 | -1.22643 | 0.97011 | 1390 | 259.3495 | 2.00138 | 0.96731 | 1390 | 262.0574 | -0.62079 | 0.9609  | 1390 | 258.9601 | 1.52145 | 0.97547 | 1390 | 259.0439 | 0.11493  | 0.97899 |
| 1391 | 258.5057 | -1.2745  | 0.97009 | 1391 | 259.5196 | 1.95734 | 0.96713 | 1391 | 262.2251 | -0.67442 | 0.96061 | 1391 | 259.1318 | 1.47047 | 0.9754  | 1391 | 259.2072 | 0.07319  | 0.97896 |
| 1392 | 258.6975 | -1.32929 | 0.96995 | 1392 | 259.693  | 1.90936 | 0.96713 | 1392 | 262.415  | -0.72337 | 0.96033 | 1392 | 259.328  | 1.42989 | 0.97523 | 1392 | 259.3654 | 0.02671  | 0.97892 |
| 1393 | 258.8711 | -1.37817 | 0.96983 | 1393 | 259.8429 | 1.86669 | 0.96715 | 1393 | 262.5865 | -0.77349 | 0.96022 | 1393 | 259.4738 | 1.38364 | 0.97509 | 1393 | 259.5749 | -0.01729 | 0.97877 |
| 1394 | 259.049  | -1.43046 | 0.96974 | 1394 | 260.0215 | 1.81405 | 0.96694 | 1394 | 262.7393 | -0.81851 | 0.96018 | 1394 | 259.6464 | 1.34406 | 0.97508 | 1394 | 259.7223 | -0.06145 | 0.97865 |
| 1395 | 259.1915 | -1.47067 | 0.96972 | 1395 | 260.2033 | 1.76864 | 0.96676 | 1395 | 262.9084 | -0.87348 | 0.95996 | 1395 | 259.8099 | 1.29553 | 0.97505 | 1395 | 259.8931 | -0.10271 | 0.97862 |
| 1396 | 259.3778 | -1.52782 | 0.9696  | 1396 | 260.376  | 1.71819 | 0.96673 | 1396 | 263.1075 | -0.92308 | 0.95971 | 1396 | 260.0083 | 1.25305 | 0.97485 | 1396 | 260.0435 | -0.14864 | 0.9786  |
| 1397 | 259.5558 | -1.57929 | 0.96942 | 1397 | 260.5261 | 1.67339 | 0.96672 | 1397 | 263.2658 | -0.97    | 0.95963 | 1397 | 260.1626 | 1.20692 | 0.97468 | 1397 | 260.2478 | -0.19498 | 0.97847 |
| 1398 | 259.7194 | -1.63334 | 0.96934 | 1398 | 260.7051 | 1.61927 | 0.96657 | 1398 | 263.4287 | -1.01756 | 0.95963 | 1398 | 260.3345 | 1.1647  | 0.9747  | 1398 | 260.401  | -0.23984 | 0.97835 |
| 1399 | 259.8723 | -1.68186 | 0.96932 | 1399 | 260.8897 | 1.57116 | 0.96634 | 1399 | 263.5878 | -1.07083 | 0.95948 | 1399 | 260.4888 | 1.11331 | 0.97467 | 1399 | 260.5735 | -0.28279 | 0.97832 |
| 1400 | 260.0502 | -1.73934 | 0.96918 | 1400 | 261.0519 | 1.52023 | 0.96627 | 1400 | 263.7855 | -1.1212  | 0.95923 | 1400 | 260.6494 | 1.06702 | 0.97452 | 1400 | 260.7135 | -0.33231 | 0.97832 |
| 1401 | 260.237  | -1.78854 | 0.96902 | 1401 | 261.2138 | 1.47199 | 0.96623 | 1401 | 263.9475 | -1.17405 | 0.95915 | 1401 | 260.8398 | 1.02197 | 0.97438 | 1401 | 260.928  | -0.38301 | 0.97817 |
| 1402 | 260.3966 | -1.84609 | 0.96892 | 1402 | 261.3866 | 1.4174  | 0.96609 | 1402 | 264.1144 | -1.21592 | 0.95918 | 1402 | 261.0159 | 0.97714 | 0.97435 | 1402 | 261.0797 |          |         |

|      |          |          |         |      |          |          |         |      |          |          |         |      |          |          |         |      |          |          |         |
|------|----------|----------|---------|------|----------|----------|---------|------|----------|----------|---------|------|----------|----------|---------|------|----------|----------|---------|
| 1463 | 270.7727 | -5.28747 | 0.96102 | 1463 | 271.7777 | -1.8876  | 0.95644 | 1463 | 274.566  | -4.27434 | 0.94804 | 1463 | 271.4061 | -1.98466 | 0.96802 | 1463 | 271.4628 | -3.60019 | 0.97115 |
| 1464 | 270.9483 | -5.34779 | 0.96086 | 1464 | 271.9866 | -1.95091 | 0.95629 | 1464 | 274.7254 | -4.3259  | 0.94793 | 1464 | 271.5898 | -2.03869 | 0.96788 | 1464 | 271.6212 | -3.66001 | 0.97095 |
| 1465 | 271.1031 | -5.41879 | 0.96072 | 1465 | 272.1242 | -2.00835 | 0.956   | 1465 | 274.9184 | -4.38665 | 0.94775 | 1465 | 271.7665 | -2.09405 | 0.96785 | 1465 | 271.7965 | -3.71864 | 0.9708  |
| 1466 | 271.3173 | -5.4841  | 0.96052 | 1466 | 272.3038 | -2.0728  | 0.95577 | 1466 | 275.091  | -4.4379  | 0.9474  | 1466 | 271.9299 | -2.14299 | 0.96778 | 1466 | 271.9791 | -3.78146 | 0.97075 |
| 1467 | 271.4502 | -5.54583 | 0.96023 | 1467 | 272.4638 | -2.13609 | 0.95564 | 1467 | 275.2471 | -4.49564 | 0.94708 | 1467 | 272.0812 | -2.1957  | 0.96756 | 1467 | 272.1552 | -3.83489 | 0.97063 |
| 1468 | 271.6321 | -5.61288 | 0.96003 | 1468 | 272.6676 | -2.1978  | 0.9555  | 1468 | 275.4157 | -4.54662 | 0.947   | 1468 | 272.2716 | -2.25122 | 0.96734 | 1468 | 272.3039 | -3.89356 | 0.97041 |
| 1469 | 271.7878 | -5.67617 | 0.95993 | 1469 | 272.8105 | -2.25224 | 0.95521 | 1469 | 275.5986 | -4.6097  | 0.94689 | 1469 | 272.4518 | -2.30715 | 0.96727 | 1469 | 272.4743 | -3.95071 | 0.97024 |
| 1470 | 271.994  | -5.74533 | 0.95973 | 1470 | 272.9851 | -2.31531 | 0.95489 | 1470 | 275.7824 | -4.66467 | 0.94657 | 1470 | 272.6094 | -2.35437 | 0.96724 | 1470 | 272.6588 | -4.01219 | 0.97016 |
| 1471 | 272.138  | -5.80332 | 0.95948 | 1471 | 273.1404 | -2.37437 | 0.95474 | 1471 | 275.9321 | -4.72298 | 0.94632 | 1471 | 272.7674 | -2.41018 | 0.96702 | 1471 | 272.8387 | -4.06441 | 0.97005 |
| 1472 | 272.3149 | -5.86635 | 0.95934 | 1472 | 273.3411 | -2.43956 | 0.95456 | 1472 | 276.0946 | -4.77694 | 0.94621 | 1472 | 272.9552 | -2.46463 | 0.96676 | 1472 | 272.9761 | -4.12235 | 0.96979 |
| 1473 | 272.4653 | -5.92769 | 0.95922 | 1473 | 273.4941 | -2.49538 | 0.95425 | 1473 | 276.278  | -4.84207 | 0.94613 | 1473 | 273.1277 | -2.52168 | 0.96667 | 1473 | 273.157  | -4.18021 | 0.96956 |
| 1474 | 272.6711 | -5.99402 | 0.95902 | 1474 | 273.6606 | -2.55939 | 0.95393 | 1474 | 276.4684 | -4.89633 | 0.94581 | 1474 | 273.2936 | -2.57085 | 0.96667 | 1474 | 273.337  | -4.24034 | 0.96947 |
| 1475 | 272.8218 | -6.0506  | 0.95877 | 1475 | 273.8245 | -2.62227 | 0.95375 | 1475 | 276.6127 | -4.95661 | 0.94543 | 1475 | 273.4446 | -2.62574 | 0.96647 | 1475 | 273.5159 | -4.2933  | 0.96935 |
| 1476 | 272.9914 | -6.11539 | 0.95855 | 1476 | 274.023  | -2.68766 | 0.9536  | 1476 | 276.7885 | -5.01191 | 0.94521 | 1476 | 273.6346 | -2.68187 | 0.96619 | 1476 | 273.6601 | -4.35417 | 0.96913 |
| 1477 | 273.148  | -6.1743  | 0.95849 | 1477 | 274.1764 | -2.74587 | 0.95334 | 1477 | 276.9571 | -5.07651 | 0.9451  | 1477 | 273.8072 | -2.73941 | 0.96605 | 1477 | 273.8355 | -4.41044 | 0.96892 |
| 1478 | 273.3505 | -6.24151 | 0.95831 | 1478 | 274.3419 | -2.81205 | 0.95308 | 1478 | 277.1489 | -5.13459 | 0.94479 | 1478 | 273.9753 | -2.78709 | 0.96599 | 1478 | 274.0125 | -4.47493 | 0.96882 |
| 1479 | 273.5037 | -6.30143 | 0.95811 | 1479 | 274.5046 | -2.875   | 0.95293 | 1479 | 277.2967 | -5.19785 | 0.94436 | 1479 | 274.121  | -2.84075 | 0.96587 | 1479 | 274.2059 | -4.53094 | 0.96873 |
| 1480 | 273.6731 | -6.36893 | 0.95792 | 1480 | 274.6911 | -2.94167 | 0.95281 | 1480 | 277.4965 | -5.25467 | 0.94412 | 1480 | 274.3192 | -2.8982  | 0.96562 | 1480 | 274.3364 | -4.59101 | 0.96849 |
| 1481 | 273.8303 | -6.4271  | 0.95774 | 1481 | 274.8602 | -2.99992 | 0.9526  | 1481 | 277.6331 | -5.32372 | 0.94397 | 1481 | 274.4871 | -2.95285 | 0.96545 | 1481 | 274.5178 | -4.65125 | 0.96826 |
| 1482 | 274.0231 | -6.49423 | 0.95764 | 1482 | 275.0155 | -3.06594 | 0.95226 | 1482 | 277.8391 | -5.38724 | 0.94365 | 1482 | 274.66   | -3.00172 | 0.96542 | 1482 | 274.6924 | -4.71558 | 0.96812 |
| 1483 | 274.191  | -6.55504 | 0.95746 | 1483 | 275.1841 | -3.13013 | 0.95202 | 1483 | 277.9793 | -5.4491  | 0.94342 | 1483 | 274.8071 | -3.05528 | 0.96532 | 1483 | 274.8796 | -4.77497 | 0.96799 |
| 1484 | 274.3411 | -6.62014 | 0.9572  | 1484 | 275.3727 | -3.19633 | 0.95187 | 1484 | 278.1556 | -5.51142 | 0.94322 | 1484 | 274.9992 | -3.10959 | 0.96507 | 1484 | 275.016  | -4.83448 | 0.96779 |
| 1485 | 274.503  | -6.68142 | 0.95714 | 1485 | 275.5627 | -3.25518 | 0.95164 | 1485 | 278.3146 | -5.57984 | 0.94274 | 1485 | 275.1647 | -3.16492 | 0.96488 | 1485 | 275.1998 | -4.89616 | 0.96754 |
| 1486 | 274.6977 | -6.75253 | 0.957   | 1486 | 275.6933 | -3.32218 | 0.95129 | 1486 | 278.5197 | -5.64363 | 0.94245 | 1486 | 275.3415 | -3.21506 | 0.96481 | 1486 | 275.3663 | -4.95272 | 0.9674  |
| 1487 | 274.8625 | -6.81361 | 0.95683 | 1487 | 275.872  | -3.38664 | 0.951   | 1487 | 278.6595 | -5.70976 | 0.94204 | 1487 | 275.4847 | -3.2655  | 0.9647  | 1487 | 275.5594 | -5.02058 | 0.96729 |
| 1488 | 275.0228 | -6.8834  | 0.95653 | 1488 | 276.0519 | -3.4539  | 0.95088 | 1488 | 278.8465 | -5.77585 | 0.94172 | 1488 | 275.6841 | -3.32345 | 0.96447 | 1488 | 275.7002 | -5.07634 | 0.96709 |
| 1489 | 275.189  | -6.94582 | 0.95633 | 1489 | 276.2293 | -3.51327 | 0.95068 | 1489 | 278.9927 | -5.84461 | 0.94157 | 1489 | 275.847  | -3.37628 | 0.96425 | 1489 | 275.8738 | -5.14013 | 0.96684 |
| 1490 | 275.3714 | -7.01579 | 0.95621 | 1490 | 276.3776 | -3.58065 | 0.95033 | 1490 | 279.1999 | -5.91291 | 0.94136 | 1490 | 276.0215 | -3.43126 | 0.96419 | 1490 | 276.0519 | -5.20336 | 0.96668 |
| 1491 | 275.5506 | -7.07806 | 0.95598 | 1491 | 276.5513 | -3.64386 | 0.95004 | 1491 | 279.3419 | -5.97825 | 0.94094 | 1491 | 276.1637 | -3.48333 | 0.96407 | 1491 | 276.243  | -5.26675 | 0.96657 |
| 1492 | 275.6965 | -7.148   | 0.95569 | 1492 | 276.7238 | -3.71242 | 0.94986 | 1492 | 279.5185 | -6.05076 | 0.94062 | 1492 | 276.36   | -3.54574 | 0.96379 | 1492 | 276.385  | -5.32592 | 0.96637 |
| 1493 | 275.8718 | -7.21021 | 0.95545 | 1493 | 276.9131 | -3.77438 | 0.94966 | 1493 | 279.6758 | -6.11879 | 0.94048 | 1493 | 276.5268 | -3.60006 | 0.96351 | 1493 | 276.557  | -5.39186 | 0.96611 |
| 1494 | 276.0492 | -7.28129 | 0.95537 | 1494 | 277.0479 | -3.84058 | 0.94931 | 1494 | 279.8331 | -6.19061 | 0.94026 | 1494 | 276.7029 | -3.6589  | 0.96337 | 1494 | 276.7308 | -5.4568  | 0.96592 |
| 1495 | 276.2351 | -7.34423 | 0.95521 | 1495 | 277.2291 | -3.90747 | 0.94897 | 1495 | 280.0307 | -6.25562 | 0.93984 | 1495 | 276.8505 | -3.70945 | 0.96325 | 1495 | 276.9155 | -5.52462 | 0.96579 |
| 1496 | 276.3679 | -7.4134  | 0.95488 | 1496 | 277.406  | -3.98057 | 0.94881 | 1496 | 280.2033 | -6.32846 | 0.93946 | 1496 | 277.0364 | -3.77461 | 0.96297 | 1496 | 277.0685 | -5.58604 | 0.96561 |
| 1497 | 276.5511 | -7.48027 | 0.95468 | 1497 | 277.5912 | -4.04499 | 0.94864 | 1497 | 280.3602 | -6.39877 | 0.93924 | 1497 | 277.2127 | -3.82833 | 0.96267 | 1497 | 277.2332 | -5.653   | 0.96536 |
| 1498 | 276.7206 | -7.55    | 0.95456 | 1498 | 277.7321 | -4.11362 | 0.94827 | 1498 | 280.5576 | -6.47136 | 0.93906 | 1498 | 277.3825 | -3.88685 | 0.96258 | 1498 | 277.408  | -5.72026 | 0.96514 |
| 1499 | 276.9128 | -7.61205 | 0.95436 | 1499 | 277.9156 | -4.18381 | 0.94792 | 1499 | 280.7197 | -6.53707 | 0.93864 | 1499 | 277.5334 | -3.93866 | 0.96249 | 1499 | 277.5931 | -5.78979 | 0.96505 |
| 1500 | 277.0752 | -7.68066 | 0.95407 | 1500 | 278.0855 | -4.25674 | 0.94774 | 1500 | 280.884  | -6.60829 | 0.93829 | 1500 | 277.7182 | -4.00135 | 0.96227 | 1500 | 277.7451 | -5.84885 | 0.96489 |
| 1501 | 277.2318 | -7.7443  | 0.9538  | 1501 | 278.2771 | -4.32637 | 0.94759 | 1501 | 281.0412 | -6.67709 | 0.93808 | 1501 | 277.8977 | -4.05387 | 0.96199 | 1501 | 277.9077 | -5.9169  | 0.96463 |
| 1502 | 277.4023 | -7.81378 | 0.95362 | 1502 | 278.4113 | -4.39291 | 0.94725 | 1502 | 281.2394 | -6.74839 | 0.93783 | 1502 | 278.0629 | -4.11169 | 0.96179 | 1502 | 278.0953 | -5.98516 | 0.9644  |
| 1503 | 277.5991 | -7.87681 | 0.95344 | 1503 | 278.587  | -4.46571 | 0.94685 | 1503 | 281.4018 | -6.81006 | 0.93748 | 1503 | 278.2209 | -4.16309 | 0.9617  | 1503 | 278.2726 | -6.05273 | 0.96427 |
| 1504 | 277.7302 | -7.94108 | 0.95311 | 1504 | 278.7624 | -4.53849 | 0.94658 | 1504 | 281.5816 | -6.88139 | 0.93699 | 1504 | 278.3943 | -4.22569 | 0.9615  | 1504 | 278.4323 | -6.11185 | 0.96413 |
| 1505 | 277.9128 | -8.00837 | 0.95286 | 1505 | 278.9541 | -4.61061 | 0.94643 | 1505 | 281.7267 | -6.94857 | 0.93674 | 1505 | 278.5809 | -4.28102 | 0.96117 | 1505 | 278.5914 | -6.17742 | 0.96387 |
| 1506 | 278.0747 | -8.08059 | 0.95272 | 1506 | 279.0927 | -4.67761 | 0.94612 | 1506 | 281.9212 | -7.02068 | 0.93652 | 1506 | 278.7435 | -4.34125 | 0.96097 | 1506 | 278.7718 | -6.24299 | 0.96362 |
| 1507 | 278.2711 | -8.14997 | 0.95256 | 1507 | 279.2685 | -4.74965 | 0.94571 | 1507 | 282.0885 | -7.08378 | 0.93614 | 1507 | 278.9019 | -4.39633 | 0.96086 | 1507 | 278.9512 | -6.31027 | 0.96346 |
| 1508 | 278.4147 | -8.21947 | 0.95234 | 1508 | 279.4449 | -4.82321 | 0.94539 | 1508 | 282.2436 | -7.15556 | 0.93569 | 1508 | 279.0756 | -4.46147 | 0.96066 | 1508 | 279.1149 | -6.37038 | 0.96331 |
| 1509 | 278.5895 | -8.29171 | 0.95207 | 1509 | 279.6312 | -4.89769 | 0.94522 | 1509 | 282.4062 | -7.22177 | 0.93537 | 1509 | 279.2702 | -4.51952 | 0.96035 | 1509 | 279.2586 | -6.43602 | 0.96305 |
| 1510 | 278.7506 | -8.3597  | 0.95191 | 1510 | 279.813  | -4.96774 | 0.94493 | 1510 | 282.5913 | -7.29527 | 0.93515 | 1510 | 279.4161 | -4.5812  | 0.9601  | 1510 | 279.4515 | -6.50551 | 0.96276 |
| 1511 | 278.9541 | -8.43432 | 0.95173 | 1511 | 279.9472 | -5.0407  | 0.94455 | 1511 | 282.7741 | -7.3598  | 0.93484 | 1511 | 279.5874 | -4.63794 | 0.96001 | 1511 | 279.6245 | -6.57383 | 0.9626  |
| 1512 | 279.0984 | -8.49987 | 0.95148 | 1512 | 280.1252 | -5.11471 | 0.94423 | 1512 | 282.916  | -7.43035 | 0.93435 | 1512 | 279.7529 | -4.70408 | 0.95984 | 1512 | 279.7918 | -6.6414  | 0.96245 |
| 1513 | 279.2657 | -8.572   | 0.9512  | 1513 | 280.3148 | -5.19145 | 0.94403 | 1513 | 283.0899 | -7.49738 | 0.93403 | 1513 | 279.9478 | -4.76433 | 0.95954 | 1513 | 279.9438 | -6.71198 | 0.96223 |
| 1514 | 279.4393 | -8.63887 | 0.95102 | 1514 | 280.4582 | -5.25759 | 0.9438  | 1514 | 283.264  | -7.57185 | 0.93385 | 1514 | 280.102  | -4.82749 | 0.95929 | 1514 | 280.1363 | -6.78561 | 0.96194 |
| 1515 | 279.6354 | -8.70835 | 0.95083 | 1515 | 280.6201 | -5.33427 | 0.94345 | 1515 | 283.4501 | -7.63729 | 0.93361 | 1515 | 280.2702 | -4.88628 | 0.95917 | 1515 | 280.3015 | -6.85855 |         |

|      |          |           |         |      |          |           |         |      |          |           |         |      |          |           |         |      |          |           |         |
|------|----------|-----------|---------|------|----------|-----------|---------|------|----------|-----------|---------|------|----------|-----------|---------|------|----------|-----------|---------|
| 1576 | 289.9646 | -12.85227 | 0.93395 | 1576 | 290.957  | -9.7991   | 0.92037 | 1576 | 293.8186 | -11.65431 | 0.90925 | 1576 | 290.6364 | -8.68861  | 0.94338 | 1576 | 290.6433 | -11.37156 | 0.9454  |
| 1577 | 290.1407 | -12.92255 | 0.9336  | 1577 | 291.1583 | -9.87179  | 0.91983 | 1577 | 293.9767 | -11.71405 | 0.90883 | 1577 | 290.8156 | -8.7478   | 0.94302 | 1577 | 290.8003 | -11.44801 | 0.94504 |
| 1578 | 290.2812 | -12.99247 | 0.93327 | 1578 | 291.3178 | -9.93898  | 0.91929 | 1578 | 294.1376 | -11.7828  | 0.90827 | 1578 | 291.0028 | -8.80788  | 0.94283 | 1578 | 290.957  | -11.51949 | 0.94478 |
| 1579 | 290.475  | -13.06205 | 0.93285 | 1579 | 291.4935 | -10.00901 | 0.91888 | 1579 | 294.3197 | -11.8524  | 0.90772 | 1579 | 291.1496 | -8.86076  | 0.94252 | 1579 | 291.1339 | -11.60056 | 0.94449 |
| 1580 | 290.6409 | -13.1361  | 0.93242 | 1580 | 291.6357 | -10.07198 | 0.91851 | 1580 | 294.4975 | -11.92505 | 0.90736 | 1580 | 291.3162 | -8.92161  | 0.94211 | 1580 | 291.3255 | -11.67467 | 0.94411 |
| 1581 | 290.8205 | -13.20356 | 0.93215 | 1581 | 291.8354 | -10.14809 | 0.91796 | 1581 | 294.6611 | -11.98578 | 0.90702 | 1581 | 291.4935 | -8.98146  | 0.94177 | 1581 | 291.4726 | -11.75252 | 0.94372 |
| 1582 | 290.9583 | -13.26863 | 0.93182 | 1582 | 292.0077 | -10.21183 | 0.91742 | 1582 | 294.8141 | -12.05458 | 0.90639 | 1582 | 291.6762 | -9.04311  | 0.94155 | 1582 | 291.6404 | -11.8247  | 0.94346 |
| 1583 | 291.1556 | -13.33963 | 0.93137 | 1583 | 292.1682 | -10.27947 | 0.91696 | 1583 | 295.0026 | -12.12081 | 0.90585 | 1583 | 291.8342 | -9.09583  | 0.9413  | 1583 | 291.8044 | -11.90641 | 0.94317 |
| 1584 | 291.3241 | -13.40584 | 0.931   | 1584 | 292.3221 | -10.34064 | 0.91662 | 1584 | 295.1733 | -12.18533 | 0.90538 | 1584 | 291.991  | -9.15784  | 0.94091 | 1584 | 291.9986 | -11.98116 | 0.94275 |
| 1585 | 291.493  | -13.47664 | 0.9307  | 1585 | 292.5164 | -10.41225 | 0.9161  | 1585 | 295.342  | -12.24257 | 0.90496 | 1585 | 292.1728 | -9.21861  | 0.94055 | 1585 | 292.1484 | -12.06082 | 0.94235 |
| 1586 | 291.6435 | -13.53831 | 0.93041 | 1586 | 292.6838 | -10.474   | 0.9155  | 1586 | 295.4939 | -12.30268 | 0.90441 | 1586 | 292.3559 | -9.28139  | 0.9403  | 1586 | 292.3284 | -12.13576 | 0.94206 |
| 1587 | 291.8295 | -13.60632 | 0.93008 | 1587 | 292.8511 | -10.54047 | 0.91501 | 1587 | 295.6798 | -12.36469 | 0.90378 | 1587 | 292.5118 | -9.33564  | 0.94002 | 1587 | 292.4826 | -12.21698 | 0.94178 |
| 1588 | 292.0001 | -13.66835 | 0.92971 | 1588 | 293.0055 | -10.59789 | 0.91467 | 1588 | 295.8547 | -12.42609 | 0.90329 | 1588 | 292.669  | -9.39644  | 0.93961 | 1588 | 292.6861 | -12.29183 | 0.94139 |
| 1589 | 292.1787 | -13.73459 | 0.92944 | 1589 | 293.1877 | -10.66677 | 0.9142  | 1589 | 296.032  | -12.48084 | 0.90287 | 1589 | 292.8522 | -9.45586  | 0.93919 | 1589 | 292.8279 | -12.36795 | 0.94099 |
| 1590 | 292.3261 | -13.79138 | 0.9292  | 1590 | 293.3705 | -10.72628 | 0.91363 | 1590 | 296.1742 | -12.53887 | 0.90232 | 1590 | 293.0266 | -9.516    | 0.93894 | 1590 | 293.0026 | -12.44194 | 0.94068 |
| 1591 | 292.5035 | -13.85355 | 0.92883 | 1591 | 293.5322 | -10.78758 | 0.91312 | 1591 | 296.3651 | -12.59809 | 0.90169 | 1591 | 293.1959 | -9.56888  | 0.93869 | 1591 | 293.1599 | -12.52179 | 0.94042 |
| 1592 | 292.6873 | -13.90962 | 0.92846 | 1592 | 293.6871 | -10.84291 | 0.91277 | 1592 | 296.5389 | -12.65679 | 0.90112 | 1592 | 293.347  | -9.62694  | 0.9383  | 1592 | 293.3634 | -12.59359 | 0.94006 |
| 1593 | 292.8542 | -13.9688  | 0.92813 | 1593 | 293.8648 | -10.90801 | 0.91234 | 1593 | 296.7145 | -12.71299 | 0.90078 | 1593 | 293.5333 | -9.68705  | 0.93791 | 1593 | 293.5023 | -12.66644 | 0.93963 |
| 1594 | 293.0078 | -14.02212 | 0.9278  | 1594 | 294.0547 | -10.96443 | 0.91177 | 1594 | 296.8591 | -12.7673  | 0.90026 | 1594 | 293.707  | -9.74524  | 0.93763 | 1594 | 293.6821 | -12.73995 | 0.93929 |
| 1595 | 293.1822 | -14.08192 | 0.92741 | 1595 | 294.2094 | -11.02545 | 0.91122 | 1595 | 297.048  | -12.82839 | 0.89957 | 1595 | 293.8776 | -9.79853  | 0.93741 | 1595 | 293.8342 | -12.81106 | 0.93902 |
| 1596 | 293.3648 | -14.13227 | 0.92696 | 1596 | 294.3766 | -11.08024 | 0.91082 | 1596 | 297.2196 | -12.88814 | 0.89905 | 1596 | 294.0214 | -9.85472  | 0.93705 | 1596 | 294.0413 | -12.88257 | 0.9387  |
| 1597 | 293.5322 | -14.18888 | 0.92663 | 1597 | 294.5429 | -11.1429  | 0.91042 | 1597 | 297.4018 | -12.94192 | 0.89863 | 1597 | 294.2137 | -9.91193  | 0.93661 | 1597 | 294.1872 | -12.95042 | 0.93826 |
| 1598 | 293.6895 | -14.24068 | 0.9264  | 1598 | 294.7368 | -11.19856 | 0.90985 | 1598 | 297.5627 | -12.99518 | 0.89814 | 1598 | 294.3853 | -9.96964  | 0.9363  | 1598 | 294.3619 | -12.92099 | 0.93789 |
| 1599 | 293.8508 | -14.29949 | 0.92603 | 1599 | 294.8998 | -11.25963 | 0.90927 | 1599 | 297.7233 | -13.05805 | 0.89751 | 1599 | 294.5567 | -10.02101 | 0.93605 | 1599 | 294.5108 | -13.08783 | 0.93763 |
| 1600 | 294.0476 | -14.35348 | 0.92562 | 1600 | 295.0571 | -11.31302 | 0.90877 | 1600 | 297.9021 | -13.11226 | 0.89692 | 1600 | 294.7019 | -10.07064 | 0.93572 | 1600 | 294.725  | -13.1578  | 0.93728 |
| 1601 | 294.21   | -14.4107  | 0.92531 | 1601 | 295.2174 | -11.37665 | 0.90844 | 1601 | 298.0826 | -13.16968 | 0.89654 | 1601 | 294.896  | -10.1339  | 0.93525 | 1601 | 294.8669 | -13.22198 | 0.93686 |
| 1602 | 294.3691 | -14.47097 | 0.92506 | 1602 | 295.422  | -11.43186 | 0.9079  | 1602 | 298.2263 | -13.22186 | 0.89612 | 1602 | 295.0609 | -10.19    | 0.93489 | 1602 | 295.0407 | -13.29339 | 0.93645 |
| 1603 | 294.5337 | -14.53768 | 0.92472 | 1603 | 295.628  | -11.49057 | 0.9073  | 1603 | 298.4059 | -13.28283 | 0.89553 | 1603 | 295.2412 | -10.24382 | 0.93467 | 1603 | 295.1962 | -13.35969 | 0.93615 |
| 1604 | 294.7037 | -14.59453 | 0.92431 | 1604 | 295.7398 | -11.54531 | 0.90681 | 1604 | 298.5926 | -13.33564 | 0.89501 | 1604 | 295.3785 | -10.29534 | 0.93436 | 1604 | 295.3948 | -13.42918 | 0.93581 |
| 1605 | 294.8873 | -14.65411 | 0.92396 | 1605 | 295.8983 | -11.60683 | 0.9064  | 1605 | 298.7666 | -13.38993 | 0.89462 | 1605 | 295.5707 | -10.35654 | 0.93392 | 1605 | 295.5487 | -13.49319 | 0.93534 |
| 1606 | 295.057  | -14.7024  | 0.92371 | 1606 | 296.0986 | -11.66304 | 0.90583 | 1606 | 298.9171 | -13.44106 | 0.89424 | 1606 | 295.7412 | -10.40951 | 0.93356 | 1606 | 295.7175 | -13.56395 | 0.93493 |
| 1607 | 295.2066 | -14.76018 | 0.92334 | 1607 | 296.2482 | -11.7213  | 0.90521 | 1607 | 299.0843 | -13.49698 | 0.89361 | 1607 | 295.9181 | -10.46443 | 0.93331 | 1607 | 295.8715 | -13.6321  | 0.93463 |
| 1608 | 295.4134 | -14.80797 | 0.92297 | 1608 | 296.4249 | -11.77512 | 0.90475 | 1608 | 299.2731 | -13.55126 | 0.89299 | 1608 | 296.0613 | -10.51418 | 0.933   | 1608 | 296.072  | -13.70306 | 0.93431 |
| 1609 | 295.5703 | -14.85784 | 0.92264 | 1609 | 296.5751 | -11.83647 | 0.90434 | 1609 | 299.4471 | -13.60492 | 0.89254 | 1609 | 296.2489 | -10.57395 | 0.93253 | 1609 | 296.2337 | -13.76671 | 0.93387 |
| 1610 | 295.7398 | -14.89672 | 0.92231 | 1610 | 296.7856 | -11.89316 | 0.90383 | 1610 | 299.6029 | -13.65275 | 0.89208 | 1610 | 296.4227 | -10.62526 | 0.93212 | 1610 | 296.3963 | -13.83656 | 0.93344 |
| 1611 | 295.8872 | -14.93883 | 0.92194 | 1611 | 296.9292 | -11.94861 | 0.90326 | 1611 | 299.7687 | -13.70191 | 0.89146 | 1611 | 296.5969 | -10.67969 | 0.93184 | 1611 | 296.5579 | -13.90002 | 0.93312 |
| 1612 | 296.096  | -14.98492 | 0.92155 | 1612 | 297.1034 | -12.00701 | 0.90277 | 1612 | 299.966  | -13.7614  | 0.8908  | 1612 | 296.7488 | -10.72799 | 0.93153 | 1612 | 296.753  | -13.96893 | 0.93281 |
| 1613 | 296.2497 | -15.0276  | 0.92114 | 1613 | 297.2529 | -12.06713 | 0.90234 | 1613 | 300.1308 | -13.81503 | 0.89034 | 1613 | 296.9226 | -10.78675 | 0.93106 | 1613 | 296.9168 | -14.02678 | 0.93237 |
| 1614 | 296.4202 | -15.06475 | 0.92087 | 1614 | 297.4629 | -12.12796 | 0.90185 | 1614 | 300.2924 | -13.86294 | 0.88996 | 1614 | 297.1069 | -10.83954 | 0.93065 | 1614 | 297.0758 | -14.09263 | 0.93192 |
| 1615 | 296.5708 | -15.1084  | 0.92054 | 1615 | 297.6047 | -12.18376 | 0.9012  | 1615 | 300.4518 | -13.91198 | 0.88937 | 1615 | 297.2756 | -10.89508 | 0.93034 | 1615 | 297.2395 | -14.15241 | 0.93158 |
| 1616 | 296.7246 | -15.15296 | 0.92011 | 1616 | 297.7817 | -12.24488 | 0.90065 | 1616 | 300.646  | -13.96883 | 0.88871 | 1616 | 297.4272 | -10.94685 | 0.93007 | 1616 | 297.4281 | -14.21844 | 0.93128 |
| 1617 | 296.9321 | -15.19997 | 0.91976 | 1617 | 297.9287 | -12.30483 | 0.90025 | 1617 | 300.8151 | -14.02211 | 0.88819 | 1617 | 297.6032 | -11.01014 | 0.92965 | 1617 | 297.6021 | -14.27489 | 0.93087 |
| 1618 | 297.1058 | -15.24642 | 0.91943 | 1618 | 298.1391 | -12.37029 | 0.89973 | 1618 | 300.9851 | -14.07708 | 0.88777 | 1618 | 297.789  | -11.06289 | 0.92918 | 1618 | 297.754  | -14.33569 | 0.93043 |
| 1619 | 297.2437 | -15.28647 | 0.91917 | 1619 | 298.2919 | -12.42847 | 0.89913 | 1619 | 301.1306 | -14.124   | 0.88722 | 1619 | 297.9505 | -11.12114 | 0.92885 | 1619 | 297.9208 | -14.39221 | 0.93009 |
| 1620 | 297.4506 | -15.33847 | 0.91873 | 1620 | 298.467  | -12.49132 | 0.89853 | 1620 | 301.3354 | -14.17931 | 0.88648 | 1620 | 298.1147 | -11.17469 | 0.92854 | 1620 | 298.1027 | -14.45444 | 0.9298  |
| 1621 | 297.6131 | -15.38471 | 0.91832 | 1621 | 298.6151 | -12.55202 | 0.8981  | 1621 | 301.4967 | -14.23243 | 0.88593 | 1621 | 298.2758 | -11.23732 | 0.92815 | 1621 | 298.2846 | -14.50859 | 0.92943 |
| 1622 | 297.787  | -15.43494 | 0.91804 | 1622 | 298.8201 | -12.61654 | 0.89761 | 1622 | 301.6643 | -14.2821  | 0.88554 | 1622 | 298.4711 | -11.29291 | 0.92766 | 1622 | 298.4306 | -14.56881 | 0.92899 |
| 1623 | 297.9314 | -15.47987 | 0.91775 | 1623 | 298.9737 | -12.67156 | 0.89698 | 1623 | 301.8162 | -14.33637 | 0.88502 | 1623 | 298.6313 | -11.35054 | 0.9273  | 1623 | 298.6072 | -14.62491 | 0.92861 |
| 1624 | 298.1346 | -15.53594 | 0.91736 | 1624 | 299.1381 | -12.73569 | 0.89635 | 1624 | 302.0174 | -14.3892  | 0.88433 | 1624 | 298.7953 | -11.40245 | 0.92699 | 1624 | 298.7799 | -14.68922 | 0.92828 |
| 1625 | 298.2916 | -15.58344 | 0.91695 | 1625 | 299.2985 | -12.79318 | 0.89592 | 1625 | 302.1769 | -14.44383 | 0.88374 | 1625 | 298.9553 | -11.46272 | 0.92661 | 1625 | 298.9665 | -14.7472  | 0.92794 |
| 1626 | 298.4653 | -15.63772 | 0.91662 | 1626 | 299.4922 | -12.85721 | 0.89546 | 1626 | 302.3151 | -14.49114 | 0.88328 | 1626 | 299.1569 | -11.51778 | 0.92614 | 1626 | 299.111  | -14.80192 | 0.92742 |
| 1627 | 298.6121 | -15.68751 | 0.91635 | 1627 | 299.6581 | -12.91132 | 0.89487 | 1627 | 302.4968 | -14.54377 | 0.88273 | 1627 | 299.3086 | -11.57248 | 0.92575 | 1627 | 299.2878 | -14       |         |

|      |          |           |         |      |          |           |         |      |          |           |         |      |          |           |         |      |          |           |         |
|------|----------|-----------|---------|------|----------|-----------|---------|------|----------|-----------|---------|------|----------|-----------|---------|------|----------|-----------|---------|
| 1689 | 309.1414 | -19.71988 | 0.88988 | 1689 | 310.1546 | -16.31866 | 0.85785 | 1689 | 313.0991 | -17.35422 | 0.84589 | 1689 | 309.841  | -15.03802 | 0.89824 | 1689 | 309.8347 | -18.33275 | 0.90013 |
| 1690 | 309.3438 | -19.78787 | 0.88942 | 1690 | 310.333  | -16.36765 | 0.85707 | 1690 | 313.3016 | -17.39371 | 0.84513 | 1690 | 310.0052 | -15.09575 | 0.89777 | 1690 | 310.0075 | -18.39627 | 0.89969 |
| 1691 | 309.4767 | -19.85396 | 0.88888 | 1691 | 310.5144 | -16.4145  | 0.85639 | 1691 | 313.4438 | -17.43567 | 0.8444  | 1691 | 310.1987 | -15.15463 | 0.89738 | 1691 | 310.1638 | -18.45059 | 0.89926 |
| 1692 | 309.6555 | -19.92039 | 0.88839 | 1692 | 310.6978 | -16.4613  | 0.85756 | 1692 | 313.6188 | -17.4722  | 0.84388 | 1692 | 310.3554 | -15.20702 | 0.89689 | 1692 | 310.3227 | -18.51213 | 0.89876 |
| 1693 | 309.8187 | -19.98861 | 0.88798 | 1693 | 310.8434 | -16.50144 | 0.85505 | 1693 | 313.7786 | -17.51744 | 0.84339 | 1693 | 310.5145 | -15.26706 | 0.89629 | 1693 | 310.5167 | -18.57402 | 0.89821 |
| 1694 | 310.0219 | -20.05341 | 0.88754 | 1694 | 311.0162 | -16.54953 | 0.85425 | 1694 | 313.9774 | -17.55776 | 0.8427  | 1694 | 310.6867 | -15.32398 | 0.89576 | 1694 | 310.6822 | -18.63468 | 0.89775 |
| 1695 | 310.1607 | -20.11304 | 0.88698 | 1695 | 311.1954 | -16.59577 | 0.85348 | 1695 | 314.126  | -17.60005 | 0.84194 | 1695 | 310.8797 | -15.38434 | 0.89537 | 1695 | 310.8496 | -18.6876  | 0.89733 |
| 1696 | 310.3377 | -20.17616 | 0.88647 | 1696 | 311.3784 | -16.64005 | 0.85288 | 1696 | 314.3025 | -17.63783 | 0.84145 | 1696 | 311.0376 | -15.43613 | 0.89482 | 1696 | 310.9998 | -18.74478 | 0.89682 |
| 1697 | 310.4948 | -20.24515 | 0.88607 | 1697 | 311.5288 | -16.67842 | 0.8522  | 1697 | 314.4529 | -17.68308 | 0.84096 | 1697 | 311.1976 | -15.49725 | 0.89414 | 1697 | 311.1979 | -18.80384 | 0.89626 |
| 1698 | 310.6993 | -20.31373 | 0.88558 | 1698 | 311.6895 | -16.72378 | 0.85143 | 1698 | 314.664  | -17.72432 | 0.84027 | 1698 | 311.3702 | -15.55142 | 0.89359 | 1698 | 311.3701 | -18.85948 | 0.89574 |
| 1699 | 310.8372 | -20.37585 | 0.885   | 1699 | 311.8755 | -16.76907 | 0.85068 | 1699 | 314.8114 | -17.76559 | 0.83954 | 1699 | 311.5557 | -15.61085 | 0.89317 | 1699 | 311.5315 | -18.9095  | 0.89529 |
| 1700 | 311.0117 | -20.44754 | 0.8844  | 1700 | 312.0524 | -16.81235 | 0.85011 | 1700 | 314.9856 | -17.80685 | 0.83892 | 1700 | 311.7252 | -15.66094 | 0.89265 | 1700 | 311.68   | -18.96291 | 0.89479 |
| 1701 | 311.1723 | -20.5162  | 0.88392 | 1701 | 312.2062 | -16.84905 | 0.84954 | 1701 | 315.1384 | -17.84811 | 0.83843 | 1701 | 311.8708 | -15.71728 | 0.89202 | 1701 | 311.8785 | -19.01864 | 0.89419 |
| 1702 | 311.3666 | -20.58692 | 0.88351 | 1702 | 312.3706 | -16.89321 | 0.84888 | 1702 | 315.3517 | -17.89077 | 0.83774 | 1702 | 312.051  | -15.77383 | 0.89144 | 1702 | 312.0388 | -19.07251 | 0.89368 |
| 1703 | 311.5164 | -20.65129 | 0.88299 | 1703 | 312.5557 | -16.93422 | 0.84808 | 1703 | 315.4928 | -17.92764 | 0.83694 | 1703 | 312.2347 | -15.82963 | 0.891   | 1703 | 312.2101 | -19.12109 | 0.89324 |
| 1704 | 311.686  | -20.7233  | 0.88244 | 1704 | 312.7329 | -16.97881 | 0.84751 | 1704 | 315.6703 | -17.9675  | 0.83632 | 1704 | 312.4002 | -15.87694 | 0.89051 | 1704 | 312.3568 | -19.17209 | 0.89278 |
| 1705 | 311.8413 | -20.79168 | 0.88198 | 1705 | 312.8948 | -17.01477 | 0.84694 | 1705 | 315.8196 | -18.00379 | 0.8358  | 1705 | 312.5509 | -15.93138 | 0.88985 | 1705 | 312.5519 | -19.22685 | 0.89219 |
| 1706 | 312.0387 | -20.86563 | 0.88155 | 1706 | 313.0489 | -17.05715 | 0.8462  | 1706 | 316.0262 | -18.0443  | 0.83517 | 1706 | 312.7298 | -15.98497 | 0.88924 | 1706 | 312.7181 | -19.2814  | 0.89165 |
| 1707 | 312.1978 | -20.93171 | 0.88103 | 1707 | 313.2328 | -17.09992 | 0.84546 | 1707 | 316.1809 | -18.07949 | 0.83438 | 1707 | 312.9048 | -16.03993 | 0.8888  | 1707 | 312.8919 | -19.3326  | 0.8912  |
| 1708 | 312.3586 | -21.00489 | 0.88047 | 1708 | 313.4105 | -17.14717 | 0.84486 | 1708 | 316.3528 | -18.11837 | 0.83368 | 1708 | 313.0834 | -16.08758 | 0.88833 | 1708 | 313.0319 | -19.38425 | 0.89072 |
| 1709 | 312.5206 | -21.07657 | 0.87996 | 1709 | 313.5725 | -17.18416 | 0.84429 | 1709 | 316.5058 | -18.1516  | 0.83313 | 1709 | 313.2276 | -16.13992 | 0.88767 | 1709 | 313.2285 | -19.44339 | 0.89014 |
| 1710 | 312.715  | -21.14649 | 0.87951 | 1710 | 313.7207 | -17.22858 | 0.84354 | 1710 | 316.7065 | -18.2262  | 0.8325  | 1710 | 313.4037 | -16.19486 | 0.88704 | 1710 | 313.3949 | -19.49844 | 0.88955 |
| 1711 | 312.8738 | -21.20909 | 0.87901 | 1711 | 313.9138 | -17.27494 | 0.84275 | 1711 | 316.8684 | -18.22634 | 0.83171 | 1711 | 313.5853 | -16.25235 | 0.88655 | 1711 | 313.566  | -19.55507 | 0.88909 |
| 1712 | 313.0318 | -21.2784  | 0.87845 | 1712 | 314.0801 | -17.32112 | 0.84209 | 1712 | 317.035  | -18.26804 | 0.83095 | 1712 | 313.764  | -16.30167 | 0.88608 | 1712 | 313.7118 | -19.60725 | 0.88865 |
| 1713 | 313.2045 | -21.34661 | 0.87795 | 1713 | 314.2515 | -17.36375 | 0.84152 | 1713 | 317.192  | -18.304   | 0.83036 | 1713 | 313.9024 | -16.35588 | 0.88545 | 1713 | 313.9029 | -19.66684 | 0.88808 |
| 1714 | 313.3868 | -21.41246 | 0.87748 | 1714 | 314.3964 | -17.41006 | 0.84078 | 1714 | 317.3848 | -18.34713 | 0.82973 | 1714 | 314.0898 | -16.41438 | 0.88479 | 1714 | 314.0728 | -19.71916 | 0.88752 |
| 1715 | 313.5519 | -21.47212 | 0.87697 | 1715 | 314.5856 | -17.4586  | 0.83998 | 1715 | 317.5543 | -18.38397 | 0.82897 | 1715 | 314.26   | -16.47122 | 0.88427 | 1715 | 314.2437 | -19.77672 | 0.88702 |
| 1716 | 313.7031 | -21.53988 | 0.87626 | 1716 | 314.7598 | -17.51155 | 0.83929 | 1716 | 317.7102 | -18.42901 | 0.82821 | 1716 | 314.4435 | -16.52453 | 0.8838  | 1716 | 314.3927 | -19.82876 | 0.88657 |
| 1717 | 313.8731 | -21.60949 | 0.87574 | 1717 | 314.9355 | -17.55705 | 0.83872 | 1717 | 317.874  | -18.4667  | 0.82766 | 1717 | 314.583  | -16.57814 | 0.88325 | 1717 | 314.5737 | -19.8894  | 0.88599 |
| 1718 | 314.0588 | -21.67448 | 0.87527 | 1718 | 315.0761 | -17.60674 | 0.83804 | 1718 | 318.0629 | -18.51477 | 0.82713 | 1718 | 314.7607 | -16.63597 | 0.88259 | 1718 | 314.7535 | -19.94451 | 0.88539 |
| 1719 | 314.2345 | -21.73233 | 0.87479 | 1719 | 315.2657 | -17.66135 | 0.83724 | 1719 | 318.2441 | -18.55165 | 0.82641 | 1719 | 314.9381 | -16.69111 | 0.88204 | 1719 | 314.9174 | -20.00551 | 0.88486 |
| 1720 | 314.3753 | -21.80259 | 0.87417 | 1720 | 315.4364 | -17.71275 | 0.83653 | 1720 | 318.3916 | -18.59493 | 0.82561 | 1720 | 315.1249 | -16.74511 | 0.8816  | 1720 | 315.0728 | -20.06146 | 0.8844  |
| 1721 | 314.5535 | -21.87048 | 0.87367 | 1721 | 315.6118 | -17.76266 | 0.83596 | 1721 | 318.563  | -18.63063 | 0.82499 | 1721 | 315.2596 | -16.79619 | 0.88105 | 1721 | 315.2503 | -20.12596 | 0.88383 |
| 1722 | 314.7322 | -21.94018 | 0.87324 | 1722 | 315.7531 | -17.81409 | 0.8353  | 1722 | 318.7398 | -18.67272 | 0.82425 | 1722 | 315.4372 | -16.85571 | 0.88036 | 1722 | 315.4343 | -20.1898  | 0.88321 |
| 1723 | 314.9094 | -22.00693 | 0.8727  | 1723 | 315.9445 | -17.87126 | 0.83447 | 1723 | 318.9272 | -18.71457 | 0.82381 | 1723 | 315.6188 | -16.91092 | 0.87976 | 1723 | 315.5963 | -20.24804 | 0.88265 |
| 1724 | 315.0523 | -22.07667 | 0.8721  | 1724 | 316.1114 | -17.92196 | 0.83373 | 1724 | 319.0759 | -18.75614 | 0.82304 | 1724 | 315.7919 | -16.96651 | 0.87926 | 1724 | 315.7582 | -20.30477 | 0.88217 |
| 1725 | 315.2264 | -22.14872 | 0.87154 | 1725 | 316.2922 | -17.97531 | 0.8331  | 1725 | 319.2516 | -18.79347 | 0.82242 | 1725 | 315.9425 | -17.01873 | 0.87871 | 1725 | 315.924  | -20.37121 | 0.8816  |
| 1726 | 315.4046 | -22.22631 | 0.87103 | 1726 | 316.4368 | -18.02245 | 0.83245 | 1726 | 319.4226 | -18.83911 | 0.82129 | 1726 | 316.1126 | -17.07823 | 0.87803 | 1726 | 316.1172 | -20.43145 | 0.88094 |
| 1727 | 315.5911 | -22.29534 | 0.87055 | 1727 | 316.6162 | -18.08218 | 0.83162 | 1727 | 319.6159 | -18.87585 | 0.82131 | 1727 | 316.2942 | -17.13525 | 0.87737 | 1727 | 316.2735 | -20.49306 | 0.88037 |
| 1728 | 315.7253 | -22.37113 | 0.86995 | 1728 | 316.8021 | -18.13266 | 0.83082 | 1728 | 319.7604 | -18.91584 | 0.82055 | 1728 | 316.4673 | -17.19199 | 0.87685 | 1728 | 316.4343 | -20.54956 | 0.87987 |
| 1729 | 315.9055 | -22.44394 | 0.86939 | 1729 | 316.9729 | -18.18289 | 0.83019 | 1729 | 319.9325 | -18.95286 | 0.81989 | 1729 | 316.6242 | -17.24302 | 0.87632 | 1729 | 316.597  | -20.61347 | 0.87933 |
| 1730 | 316.0771 | -22.52041 | 0.86892 | 1730 | 317.119  | -18.22969 | 0.82957 | 1730 | 320.1015 | -18.99805 | 0.81933 | 1730 | 316.7828 | -17.30189 | 0.87563 | 1730 | 316.7963 | -20.67029 | 0.8787  |
| 1731 | 316.2672 | -22.59178 | 0.8684  | 1731 | 317.2997 | -18.28704 | 0.82877 | 1731 | 320.2984 | -19.03387 | 0.81871 | 1731 | 316.9738 | -17.35826 | 0.87498 | 1731 | 316.9484 | -20.73002 | 0.87812 |
| 1732 | 316.4062 | -22.66381 | 0.86776 | 1732 | 317.4821 | -18.33214 | 0.82797 | 1732 | 320.4402 | -19.0735  | 0.81791 | 1732 | 317.1431 | -17.41355 | 0.87443 | 1732 | 317.1184 | -20.78387 | 0.87762 |
| 1733 | 316.5864 | -22.73429 | 0.86712 | 1733 | 317.6471 | -18.38116 | 0.82734 | 1733 | 320.6196 | -19.10964 | 0.81719 | 1733 | 317.2996 | -17.4643  | 0.87393 | 1733 | 317.2744 | -20.84589 | 0.87709 |
| 1734 | 316.7509 | -22.81074 | 0.86656 | 1734 | 317.8045 | -18.42471 | 0.82671 | 1734 | 320.7802 | -19.15067 | 0.81659 | 1734 | 317.4605 | -17.52152 | 0.87322 | 1734 | 317.4766 | -20.90587 | 0.87645 |
| 1735 | 316.9442 | -22.88442 | 0.866   | 1735 | 317.9743 | -18.47541 | 0.82594 | 1735 | 320.9839 | -19.18772 | 0.81597 | 1735 | 317.6566 | -17.57897 | 0.87251 | 1735 | 317.6508 | -20.96579 | 0.87585 |
| 1736 | 317.0826 | -22.95197 | 0.86534 | 1736 | 318.1647 | -18.52103 | 0.82512 | 1736 | 321.1294 | -19.224   | 0.81518 | 1736 | 317.8229 | -17.63533 | 0.87193 | 1736 | 317.8006 | -21.01777 | 0.87535 |
| 1737 | 317.2565 | -23.03034 | 0.86467 | 1737 | 318.3327 | -18.56623 | 0.82446 | 1737 | 321.3037 | -19.26154 | 0.81448 | 1737 | 317.9862 | -17.68739 | 0.87143 | 1737 | 317.9493 | -21.08115 | 0.87482 |
| 1738 | 317.4256 | -23.10198 | 0.86408 | 1738 | 318.4847 | -18.60707 | 0.82386 | 1738 | 321.462  | -19.30038 | 0.81393 | 1738 | 318.1396 | -17.74184 | 0.87078 | 1738 | 318.1587 | -21.13975 | 0.87418 |
| 1739 | 317.6175 | -23.17774 | 0.86356 | 1739 | 318.6513 | -18.65559 | 0.82312 | 1739 | 321.6656 | -19.34059 | 0.8133  | 1739 | 318.3332 | -17.79724 | 0.87006 | 1739 | 318.307  | -21.19668 | 0.87355 |
| 1740 | 317.762  | -23.24951 | 0.86296 | 1740 | 318.8516 | -18.69881 | 0.82232 | 1740 | 321.8062 | -19.37377 | 0.81254 | 1740 | 318.4984 | -17.85322 |         |      |          |           |         |

|      |          |           |         |      |          |           |         |      |          |           |         |      |          |           |         |      |          |           |         |
|------|----------|-----------|---------|------|----------|-----------|---------|------|----------|-----------|---------|------|----------|-----------|---------|------|----------|-----------|---------|
| 1802 | 328.2304 | -27.82878 | 0.82129 | 1802 | 329.3706 | -21.27797 | 0.77596 | 1802 | 332.3046 | -21.60412 | 0.77099 | 1802 | 328.9694 | -21.04407 | 0.82858 | 1802 | 329.0089 | -24.82922 | 0.83262 |
| 1803 | 328.4179 | -27.90095 | 0.82044 | 1803 | 329.532  | -21.31904 | 0.77511 | 1803 | 332.4875 | -21.63456 | 0.77023 | 1803 | 329.1336 | -21.08829 | 0.82795 | 1803 | 329.1926 | -24.88182 | 0.83198 |
| 1804 | 328.5903 | -27.92765 | 0.81967 | 1804 | 329.6872 | -21.35362 | 0.77442 | 1804 | 332.656  | -21.66888 | 0.76957 | 1804 | 329.3192 | -21.13918 | 0.82734 | 1804 | 329.3727 | -24.92666 | 0.8313  |
| 1805 | 328.7631 | -28.0418  | 0.81901 | 1805 | 329.8871 | -21.39644 | 0.77374 | 1805 | 332.8423 | -21.69919 | 0.76905 | 1805 | 329.4915 | -21.18074 | 0.82657 | 1805 | 329.5186 | -24.97886 | 0.83053 |
| 1806 | 328.9042 | -28.11086 | 0.81826 | 1806 | 330.0564 | -21.42894 | 0.77286 | 1806 | 332.9854 | -21.72761 | 0.76832 | 1806 | 329.6451 | -21.22864 | 0.82581 | 1806 | 329.6877 | -25.0294  | 0.82983 |
| 1807 | 329.0919 | -28.18713 | 0.81747 | 1807 | 330.2085 | -21.46819 | 0.772   | 1807 | 333.1589 | -21.76347 | 0.76753 | 1807 | 329.8071 | -21.26941 | 0.82515 | 1807 | 329.8676 | -25.08533 | 0.82919 |
| 1808 | 329.2634 | -28.25401 | 0.81668 | 1808 | 330.3699 | -21.49883 | 0.77129 | 1808 | 333.3387 | -21.79718 | 0.76687 | 1808 | 329.9997 | -21.31956 | 0.82457 | 1808 | 330.0512 | -25.13294 | 0.82852 |
| 1809 | 329.4359 | -28.32564 | 0.816   | 1809 | 330.5605 | -21.53905 | 0.77063 | 1809 | 333.5229 | -21.82733 | 0.76635 | 1809 | 330.1757 | -21.35719 | 0.82383 | 1809 | 330.1936 | -25.18779 | 0.82774 |
| 1810 | 329.5824 | -28.39417 | 0.81529 | 1810 | 330.7333 | -21.56845 | 0.76978 | 1810 | 333.6599 | -21.85408 | 0.76566 | 1810 | 330.3198 | -21.40299 | 0.82304 | 1810 | 330.3716 | -25.23946 | 0.827   |
| 1811 | 329.7626 | -28.47138 | 0.81444 | 1811 | 330.8842 | -21.60292 | 0.76892 | 1811 | 333.8384 | -21.88525 | 0.76486 | 1811 | 330.4893 | -21.44371 | 0.82235 | 1811 | 330.5407 | -25.29639 | 0.82634 |
| 1812 | 329.9401 | -28.54283 | 0.81363 | 1812 | 331.0506 | -21.62984 | 0.76821 | 1812 | 334.0123 | -21.91503 | 0.7642  | 1812 | 330.6714 | -21.49215 | 0.82175 | 1812 | 330.7285 | -25.34456 | 0.82563 |
| 1813 | 330.1125 | -28.61579 | 0.81293 | 1813 | 331.2287 | -21.66752 | 0.76752 | 1813 | 334.194  | -21.94299 | 0.76365 | 1813 | 330.8498 | -21.53144 | 0.82106 | 1813 | 330.8675 | -25.39826 | 0.82485 |
| 1814 | 330.257  | -28.68214 | 0.8122  | 1814 | 331.4183 | -21.69539 | 0.76673 | 1814 | 334.3422 | -21.96607 | 0.76299 | 1814 | 330.9947 | -21.57443 | 0.82024 | 1814 | 331.0435 | -25.45115 | 0.82409 |
| 1815 | 330.4322 | -28.76239 | 0.81135 | 1815 | 331.569  | -21.72582 | 0.76584 | 1815 | 334.5085 | -21.99541 | 0.76216 | 1815 | 331.1638 | -21.61583 | 0.81956 | 1815 | 331.2096 | -25.51136 | 0.8234  |
| 1816 | 330.623  | -28.83675 | 0.8105  | 1816 | 331.7321 | -21.75097 | 0.7651  | 1816 | 334.6905 | -22.02469 | 0.76147 | 1816 | 331.3419 | -21.66399 | 0.81898 | 1816 | 331.4087 | -25.56737 | 0.82274 |
| 1817 | 330.7873 | -28.91256 | 0.80973 | 1817 | 331.9054 | -21.78486 | 0.76445 | 1817 | 334.87   | -22.05493 | 0.76094 | 1817 | 331.5312 | -21.70153 | 0.81829 | 1817 | 331.5422 | -25.62205 | 0.82194 |
| 1818 | 330.9408 | -28.98499 | 0.80899 | 1818 | 332.0944 | -21.80936 | 0.76368 | 1818 | 335.0202 | -22.07774 | 0.76032 | 1818 | 331.6692 | -21.73973 | 0.8175  | 1818 | 331.7245 | -25.68152 | 0.82118 |
| 1819 | 331.1022 | -29.06637 | 0.80815 | 1819 | 332.2363 | -21.83636 | 0.76282 | 1819 | 335.1873 | -22.10837 | 0.75949 | 1819 | 331.8413 | -21.77717 | 0.81679 | 1819 | 331.8874 | -25.73931 | 0.82047 |
| 1820 | 331.2931 | -29.14194 | 0.80726 | 1820 | 332.4129 | -21.8622  | 0.76211 | 1820 | 335.3719 | -22.13778 | 0.75876 | 1820 | 332.0194 | -21.82063 | 0.81616 | 1820 | 332.0848 | -25.79544 | 0.81979 |
| 1821 | 331.4597 | -29.21984 | 0.80647 | 1821 | 332.5778 | -21.89104 | 0.76145 | 1821 | 335.5472 | -22.16821 | 0.75824 | 1821 | 332.2113 | -21.85602 | 0.8155  | 1821 | 332.2247 | -25.84331 | 0.81901 |
| 1822 | 331.618  | -29.29195 | 0.80569 | 1822 | 332.7719 | -21.91466 | 0.76068 | 1822 | 335.7069 | -22.19077 | 0.75765 | 1822 | 332.3485 | -21.89186 | 0.81468 | 1822 | 332.3399 | -25.89708 | 0.81821 |
| 1823 | 331.7759 | -29.37191 | 0.80484 | 1823 | 332.9161 | -21.9393  | 0.75986 | 1823 | 335.8651 | -22.22012 | 0.75682 | 1823 | 332.5317 | -21.92397 | 0.81388 | 1823 | 332.5647 | -25.94726 | 0.8175  |
| 1824 | 331.9739 | -29.44608 | 0.80396 | 1824 | 333.0911 | -21.96069 | 0.75906 | 1824 | 336.0451 | -22.25027 | 0.75606 | 1824 | 332.6922 | -21.96091 | 0.81322 | 1824 | 332.7548 | -26.00029 | 0.81684 |
| 1825 | 332.1328 | -29.52201 | 0.80313 | 1825 | 333.2509 | -21.98844 | 0.75824 | 1825 | 336.2266 | -22.28276 | 0.75547 | 1825 | 332.889  | -21.99444 | 0.81259 | 1825 | 332.9016 | -26.04457 | 0.8161  |
| 1826 | 332.2918 | -29.59256 | 0.80236 | 1826 | 333.459  | -22.00966 | 0.75766 | 1826 | 336.3867 | -22.30657 | 0.75492 | 1826 | 333.0291 | -22.02167 | 0.8118  | 1826 | 333.0761 | -26.09737 | 0.81528 |
| 1827 | 332.4493 | -29.66271 | 0.80153 | 1827 | 333.5953 | -22.02937 | 0.75681 | 1827 | 336.5372 | -22.33594 | 0.75415 | 1827 | 333.2002 | -22.05427 | 0.81101 | 1827 | 333.2442 | -26.14983 | 0.81455 |
| 1828 | 332.6513 | -29.73786 | 0.80062 | 1828 | 333.7741 | -22.0484  | 0.75604 | 1828 | 336.7279 | -22.36281 | 0.75336 | 1828 | 333.3665 | -22.08564 | 0.81037 | 1828 | 333.4342 | -26.20203 | 0.81387 |
| 1829 | 332.8048 | -29.80742 | 0.79981 | 1829 | 333.9315 | -22.06599 | 0.75538 | 1829 | 336.9024 | -22.39014 | 0.75273 | 1829 | 333.5649 | -22.11774 | 0.80977 | 1829 | 333.5801 | -26.24652 | 0.81313 |
| 1830 | 332.9731 | -29.87727 | 0.79906 | 1830 | 334.1342 | -22.08434 | 0.7547  | 1830 | 337.0725 | -22.42408 | 0.75218 | 1830 | 333.7016 | -22.14188 | 0.80906 | 1830 | 333.7501 | -26.29931 | 0.81229 |
| 1831 | 333.1241 | -29.94908 | 0.79825 | 1831 | 334.2775 | -22.09499 | 0.75384 | 1831 | 337.2221 | -22.45488 | 0.75145 | 1831 | 333.8774 | -22.17321 | 0.80826 | 1831 | 333.9239 | -26.35045 | 0.81152 |
| 1832 | 333.3226 | -30.00739 | 0.79732 | 1832 | 334.4552 | -22.11041 | 0.75307 | 1832 | 337.4126 | -22.48186 | 0.75062 | 1832 | 334.0084 | -22.20395 | 0.8076  | 1832 | 334.1112 | -26.40147 | 0.81084 |
| 1833 | 333.4797 | -30.07351 | 0.79649 | 1833 | 334.6096 | -22.12365 | 0.75239 | 1833 | 337.585  | -22.5111  | 0.74999 | 1833 | 334.2343 | -22.23627 | 0.80705 | 1833 | 334.2654 | -26.44377 | 0.8101  |
| 1834 | 333.6467 | -30.13287 | 0.79572 | 1834 | 334.8152 | -22.14012 | 0.75173 | 1834 | 337.7613 | -22.53364 | 0.74944 | 1834 | 334.3839 | -22.26177 | 0.80634 | 1834 | 334.4263 | -26.49041 | 0.80925 |
| 1835 | 333.7923 | -30.19769 | 0.79491 | 1835 | 334.9631 | -22.14824 | 0.75091 | 1835 | 337.9024 | -22.55762 | 0.74875 | 1835 | 334.5504 | -22.29567 | 0.80552 | 1835 | 334.5626 | -26.53544 | 0.80843 |
| 1836 | 333.9387 | -30.26623 | 0.794   | 1836 | 335.1313 | -22.16397 | 0.75011 | 1836 | 338.092  | -22.5831  | 0.74799 | 1836 | 334.7163 | -22.32865 | 0.80478 | 1836 | 334.7876 | -26.58167 | 0.80775 |
| 1837 | 334.1599 | -30.32822 | 0.79311 | 1837 | 335.2925 | -22.17731 | 0.74948 | 1837 | 338.2684 | -22.60629 | 0.74733 | 1837 | 334.9048 | -22.36492 | 0.80418 | 1837 | 334.9459 | -26.61602 | 0.80701 |
| 1838 | 334.3235 | -30.39108 | 0.79232 | 1838 | 335.4919 | -22.19237 | 0.74885 | 1838 | 338.4416 | -22.62626 | 0.74684 | 1838 | 335.0508 | -22.39625 | 0.80346 | 1838 | 335.0997 | -26.65912 | 0.80619 |
| 1839 | 334.4659 | -30.45513 | 0.79151 | 1839 | 335.6445 | -22.20127 | 0.74805 | 1839 | 338.585  | -22.64759 | 0.74625 | 1839 | 335.2113 | -22.43636 | 0.80261 | 1839 | 335.2791 | -26.70244 | 0.80536 |
| 1840 | 334.6697 | -30.52053 | 0.79057 | 1840 | 335.8132 | -22.21757 | 0.7472  | 1840 | 338.7718 | -22.67377 | 0.74545 | 1840 | 335.386  | -22.47732 | 0.80188 | 1840 | 335.4562 | -26.74807 | 0.80464 |
| 1841 | 334.8294 | -30.59437 | 0.78966 | 1841 | 335.9755 | -22.23103 | 0.74651 | 1841 | 338.9432 | -22.69195 | 0.74476 | 1841 | 335.5685 | -22.52229 | 0.80127 | 1841 | 335.6269 | -26.78787 | 0.80394 |
| 1842 | 335.0024 | -30.66153 | 0.78883 | 1842 | 336.1695 | -22.25019 | 0.74588 | 1842 | 339.1269 | -22.7148  | 0.7442  | 1842 | 335.7254 | -22.55938 | 0.80059 | 1842 | 335.7779 | -26.83594 | 0.80311 |
| 1843 | 335.1411 | -30.7298  | 0.788   | 1843 | 336.3336 | -22.26608 | 0.74512 | 1843 | 339.2665 | -22.73173 | 0.74362 | 1843 | 335.8826 | -22.60512 | 0.79979 | 1843 | 335.9566 | -26.88556 | 0.80229 |
| 1844 | 335.3393 | -30.80727 | 0.78705 | 1844 | 336.49   | -22.2793  | 0.74426 | 1844 | 339.4517 | -22.75978 | 0.74278 | 1844 | 336.0584 | -22.64998 | 0.79902 | 1844 | 336.1336 | -26.93778 | 0.80157 |
| 1845 | 335.5023 | -30.87594 | 0.78613 | 1845 | 336.6577 | -22.29524 | 0.74349 | 1845 | 339.6331 | -22.78919 | 0.74206 | 1845 | 336.2384 | -22.69612 | 0.79842 | 1845 | 336.3072 | -26.98831 | 0.80085 |
| 1846 | 335.6722 | -30.94861 | 0.7853  | 1846 | 336.8503 | -22.3183  | 0.74283 | 1846 | 339.8091 | -22.80286 | 0.7415  | 1846 | 336.4021 | -22.73349 | 0.79779 | 1846 | 336.4535 | -27.04122 | 0.80002 |
| 1847 | 335.8176 | -31.01322 | 0.78449 | 1847 | 337.016  | -22.33166 | 0.74209 | 1847 | 339.9536 | -22.82097 | 0.74091 | 1847 | 336.5537 | -22.77479 | 0.79697 | 1847 | 336.6377 | -27.09643 | 0.79916 |
| 1848 | 336.0122 | -31.08373 | 0.78354 | 1848 | 337.1691 | -22.35517 | 0.74124 | 1848 | 340.126  | -22.8486  | 0.74012 | 1848 | 336.7339 | -22.81573 | 0.79617 | 1848 | 336.8121 | -27.15291 | 0.79838 |
| 1849 | 336.1777 | -31.15186 | 0.7826  | 1849 | 337.3441 | -22.37446 | 0.74047 | 1849 | 340.3151 | -22.87246 | 0.73939 | 1849 | 336.9124 | -22.85428 | 0.79554 | 1849 | 336.987  | -27.20416 | 0.79764 |
| 1850 | 336.3458 | -31.21746 | 0.78177 | 1850 | 337.5264 | -22.3995  | 0.73984 | 1850 | 340.4854 | -22.89758 | 0.73883 | 1850 | 337.0745 | -22.88508 | 0.79489 | 1850 | 337.1313 | -27.26024 | 0.79679 |
| 1851 | 336.5001 | -31.2735  | 0.78102 | 1851 | 337.7045 | -22.41612 | 0.73913 | 1851 | 340.6383 | -22.92103 | 0.73825 | 1851 | 337.2234 | -22.92036 | 0.79409 | 1851 | 337.3146 | -27.31688 | 0.79591 |
| 1852 | 336.6794 | -31.34189 | 0.78009 | 1852 | 337.8539 | -22.43982 | 0.7383  | 1852 | 340.8038 | -22.95118 | 0.73745 | 1852 | 337.4077 | -22.95363 | 0.79327 | 1852 | 337.4903 | -27.37095 | 0.79511 |
| 1853 | 336.8618 | -31.40239 | 0.77911 | 1853 | 338.0265 | -22.45974 | 0.73753 | 1853 | 340.99   | -22.98039 | 0.73672 | 1853 | 337.5768 | -22.98    |         |      |          |           |         |



|      |          |           |         |      |          |           |         |      |          |           |         |      |          |           |         |      |          |           |         |
|------|----------|-----------|---------|------|----------|-----------|---------|------|----------|-----------|---------|------|----------|-----------|---------|------|----------|-----------|---------|
| 1915 | 347.3683 | -33.71383 | 0.71784 | 1915 | 348.6202 | -23.74683 | 0.69306 | 1915 | 351.5635 | -24.81688 | 0.69674 | 1915 | 348.0166 | -24.6366  | 0.74967 | 1915 | 348.1967 | -28.98442 | 0.7427  |
| 1916 | 347.5491 | -33.71005 | 0.71678 | 1916 | 348.7874 | -23.76787 | 0.69243 | 1916 | 351.7221 | -24.85299 | 0.69612 | 1916 | 348.1788 | -24.65715 | 0.74909 | 1916 | 348.351  | -28.99465 | 0.74192 |
| 1917 | 347.7012 | -33.69933 | 0.7158  | 1917 | 348.9479 | -23.78618 | 0.69186 | 1917 | 351.8805 | -24.88637 | 0.69566 | 1917 | 348.3472 | -24.68547 | 0.74846 | 1917 | 348.5579 | -28.99681 | 0.74103 |
| 1918 | 347.9076 | -33.69423 | 0.71473 | 1918 | 349.1048 | -23.80749 | 0.69112 | 1918 | 352.0689 | -24.92728 | 0.69511 | 1918 | 348.5405 | -24.70586 | 0.74772 | 1918 | 348.7072 | -28.99443 | 0.74017 |
| 1919 | 348.062  | -33.67957 | 0.71358 | 1919 | 349.2952 | -23.83092 | 0.69035 | 1919 | 352.2406 | -24.9606  | 0.69438 | 1919 | 348.6893 | -24.72872 | 0.74698 | 1919 | 348.8812 | -28.98663 | 0.73939 |
| 1920 | 348.2273 | -33.67    | 0.71248 | 1920 | 349.4667 | -23.85333 | 0.68972 | 1920 | 352.4026 | -24.9886  | 0.69379 | 1920 | 348.861  | -24.74728 | 0.7464  | 1920 | 349.0306 | -28.98281 | 0.73861 |
| 1921 | 348.3798 | -33.65644 | 0.71148 | 1921 | 349.6349 | -23.86942 | 0.68918 | 1921 | 352.5651 | -25.02784 | 0.6933  | 1921 | 349.0178 | -24.7695  | 0.74585 | 1921 | 349.2339 | -28.98121 | 0.7377  |
| 1922 | 348.5916 | -33.64431 | 0.71042 | 1922 | 349.7999 | -23.89211 | 0.68849 | 1922 | 352.7337 | -25.06761 | 0.69271 | 1922 | 349.2201 | -24.78612 | 0.74512 | 1922 | 349.4634 | -28.97836 | 0.73684 |
| 1923 | 348.7497 | -33.61765 | 0.70926 | 1923 | 349.9816 | -23.9159  | 0.68775 | 1923 | 352.9246 | -25.09889 | 0.69195 | 1923 | 349.3664 | -24.80391 | 0.7444  | 1923 | 349.5658 | -28.98002 | 0.73606 |
| 1924 | 348.9103 | -33.60223 | 0.70815 | 1924 | 350.1512 | -23.93792 | 0.68712 | 1924 | 353.1082 | -25.13488 | 0.69126 | 1924 | 349.536  | -24.81842 | 0.7438  | 1924 | 349.7071 | -28.98322 | 0.7353  |
| 1925 | 349.0688 | -33.58679 | 0.70714 | 1925 | 350.3191 | -23.95601 | 0.68658 | 1925 | 353.2436 | -25.16386 | 0.69077 | 1925 | 349.6915 | -24.84039 | 0.74322 | 1925 | 349.9182 | -28.99231 | 0.73445 |
| 1926 | 349.2705 | -33.58106 | 0.70612 | 1926 | 350.4676 | -23.97753 | 0.68592 | 1926 | 353.4081 | -25.19295 | 0.69018 | 1926 | 349.8984 | -24.85563 | 0.74253 | 1926 | 350.0779 | -28.9953  | 0.73357 |
| 1927 | 349.4399 | -33.56372 | 0.70497 | 1927 | 350.6633 | -23.99951 | 0.68518 | 1927 | 353.6051 | -25.23556 | 0.68942 | 1927 | 350.0402 | -24.87293 | 0.74177 | 1927 | 350.245  | -29.00127 | 0.73279 |
| 1928 | 349.5988 | -33.55009 | 0.70383 | 1928 | 350.8258 | -24.0226  | 0.68447 | 1928 | 353.7573 | -25.27208 | 0.68873 | 1928 | 350.2189 | -24.88787 | 0.74111 | 1928 | 350.3926 | -28.99902 | 0.73207 |
| 1929 | 349.7589 | -33.53032 | 0.70279 | 1929 | 351.0012 | -24.04264 | 0.68389 | 1929 | 353.9284 | -25.30494 | 0.68817 | 1929 | 350.3742 | -24.9081  | 0.74053 | 1929 | 350.5945 | -29.00741 | 0.73124 |
| 1930 | 349.9492 | -33.51821 | 0.70178 | 1930 | 351.1437 | -24.06506 | 0.68324 | 1930 | 354.0877 | -25.34407 | 0.68765 | 1930 | 350.5786 | -24.92488 | 0.73985 | 1930 | 350.7547 | -29.00523 | 0.73036 |
| 1931 | 350.1251 | -33.49957 | 0.70065 | 1931 | 351.3348 | -24.0948  | 0.68247 | 1931 | 354.2881 | -25.3783  | 0.68692 | 1931 | 350.72   | -24.93866 | 0.73905 | 1931 | 350.925  | -29.00879 | 0.72958 |
| 1932 | 350.2698 | -33.47111 | 0.6995  | 1932 | 351.5055 | -24.12048 | 0.68173 | 1932 | 354.4365 | -25.41417 | 0.68619 | 1932 | 350.9003 | -24.95722 | 0.73834 | 1932 | 351.0754 | -29.0025  | 0.72884 |
| 1933 | 350.4448 | -33.44935 | 0.69844 | 1933 | 351.679  | -24.14614 | 0.6811  | 1933 | 354.6112 | -25.44747 | 0.68564 | 1933 | 351.0429 | -24.97502 | 0.73776 | 1933 | 351.2697 | -29.00897 | 0.72803 |
| 1934 | 350.6279 | -33.43563 | 0.69743 | 1934 | 351.8208 | -24.16957 | 0.6805  | 1934 | 354.7602 | -25.48278 | 0.68512 | 1934 | 351.2542 | -24.99627 | 0.73713 | 1934 | 351.4406 | -29.00594 | 0.72713 |
| 1935 | 350.8089 | -33.41556 | 0.69633 | 1935 | 352.0171 | -24.2029  | 0.67973 | 1935 | 354.9747 | -25.52547 | 0.68439 | 1935 | 351.3981 | -25.01018 | 0.73637 | 1935 | 351.6008 | -29.00307 | 0.72633 |
| 1936 | 350.9559 | -33.39702 | 0.69516 | 1936 | 352.1831 | -24.22629 | 0.67902 | 1936 | 355.1135 | -25.55827 | 0.68363 | 1936 | 351.5712 | -25.03121 | 0.73565 | 1936 | 351.7547 | -28.996   | 0.72561 |
| 1937 | 351.1368 | -33.37828 | 0.69408 | 1937 | 352.3582 | -24.2536  | 0.67841 | 1937 | 355.2895 | -25.59219 | 0.68304 | 1937 | 351.7219 | -25.0484  | 0.73508 | 1937 | 351.944  | -28.99866 | 0.72483 |
| 1938 | 351.3037 | -33.36241 | 0.69304 | 1938 | 352.5405 | -24.27322 | 0.67785 | 1938 | 355.4367 | -25.62797 | 0.68252 | 1938 | 351.9283 | -25.07039 | 0.73447 | 1938 | 352.1165 | -28.9944  | 0.72394 |
| 1939 | 351.4941 | -33.33611 | 0.69194 | 1939 | 352.6847 | -24.30383 | 0.6771  | 1939 | 355.6453 | -25.66626 | 0.68182 | 1939 | 352.0761 | -25.08475 | 0.73373 | 1939 | 352.2767 | -28.99822 | 0.72308 |
| 1940 | 351.6346 | -33.31906 | 0.69078 | 1940 | 352.865  | -24.32769 | 0.67636 | 1940 | 355.7919 | -25.69892 | 0.68106 | 1940 | 352.2473 | -25.10754 | 0.73302 | 1940 | 352.4381 | -28.99891 | 0.72236 |
| 1941 | 351.8126 | -33.30799 | 0.68967 | 1941 | 353.0378 | -24.35312 | 0.67576 | 1941 | 355.9752 | -25.73445 | 0.6804  | 1941 | 352.4046 | -25.12408 | 0.73244 | 1941 | 352.6113 | -29.00952 | 0.72159 |
| 1942 | 351.9836 | -33.3003  | 0.68863 | 1942 | 353.1828 | -24.3746  | 0.67522 | 1942 | 356.1158 | -25.76711 | 0.67992 | 1942 | 352.6022 | -25.14787 | 0.73186 | 1942 | 352.798  | -29.0153  | 0.72071 |
| 1943 | 352.1785 | -33.28676 | 0.68751 | 1943 | 353.3626 | -24.40604 | 0.6745  | 1943 | 356.3255 | -25.80979 | 0.67929 | 1943 | 352.7654 | -25.16079 | 0.73115 | 1943 | 352.9533 | -29.0271  | 0.71989 |
| 1944 | 352.319  | -33.27677 | 0.68633 | 1944 | 353.546  | -24.42931 | 0.67376 | 1944 | 356.4796 | -25.84105 | 0.67853 | 1944 | 352.923  | -25.18317 | 0.73041 | 1944 | 353.1217 | -29.03389 | 0.71915 |
| 1945 | 352.4997 | -33.26698 | 0.68522 | 1945 | 353.7079 | -24.4577  | 0.67313 | 1945 | 356.6466 | -25.87192 | 0.67791 | 1945 | 353.0818 | -25.20071 | 0.72983 | 1945 | 353.295  | -29.04797 | 0.7184  |
| 1946 | 352.6553 | -33.26214 | 0.68418 | 1946 | 353.8669 | -24.47995 | 0.67262 | 1946 | 356.7987 | -25.91229 | 0.67742 | 1946 | 353.278  | -25.22217 | 0.72926 | 1946 | 353.489  | -29.05322 | 0.71756 |
| 1947 | 352.8591 | -33.25058 | 0.6831  | 1947 | 354.0359 | -24.51224 | 0.6719  | 1947 | 357.0005 | -25.95548 | 0.67679 | 1947 | 353.4394 | -25.2352  | 0.72855 | 1947 | 353.6315 | -29.05996 | 0.71672 |
| 1948 | 352.9953 | -33.24129 | 0.68194 | 1948 | 354.2256 | -24.53892 | 0.67114 | 1948 | 357.162  | -25.98846 | 0.67603 | 1948 | 353.596  | -25.25689 | 0.72778 | 1948 | 353.8064 | -29.06242 | 0.71596 |
| 1949 | 353.1824 | -33.23658 | 0.6808  | 1949 | 354.3886 | -24.56859 | 0.67048 | 1949 | 357.3259 | -26.02584 | 0.67538 | 1949 | 353.7603 | -25.27383 | 0.72717 | 1949 | 353.9687 | -29.07031 | 0.71523 |
| 1950 | 353.3331 | -33.23175 | 0.67978 | 1950 | 354.5498 | -24.59328 | 0.66991 | 1950 | 357.4811 | -26.05872 | 0.67492 | 1950 | 353.9451 | -25.29804 | 0.72665 | 1950 | 354.1659 | -29.07149 | 0.71437 |
| 1951 | 353.5382 | -33.22944 | 0.67872 | 1951 | 354.7073 | -24.62881 | 0.66925 | 1951 | 357.6177 | -26.09738 | 0.67429 | 1951 | 354.1181 | -25.31394 | 0.72596 | 1951 | 354.3195 | -29.0741  | 0.71351 |
| 1952 | 353.6776 | -33.24602 | 0.67753 | 1952 | 354.907  | -24.65801 | 0.66854 | 1952 | 357.8456 | -26.13009 | 0.67354 | 1952 | 354.2689 | -25.33859 | 0.72525 | 1952 | 354.4934 | -29.07303 | 0.71273 |
| 1953 | 353.8586 | -33.26076 | 0.67637 | 1953 | 355.0631 | -24.69031 | 0.66768 | 1953 | 358.0074 | -26.1648  | 0.67288 | 1953 | 354.439  | -25.36103 | 0.72462 | 1953 | 354.6491 | -29.07903 | 0.71199 |
| 1954 | 354.0217 | -33.27267 | 0.67527 | 1954 | 355.2283 | -24.71761 | 0.66674 | 1954 | 358.168  | -26.19407 | 0.67235 | 1954 | 354.6233 | -25.38896 | 0.72407 | 1954 | 354.8565 | -29.07602 | 0.71118 |
| 1955 | 354.2189 | -33.28123 | 0.6742  | 1955 | 355.3847 | -24.75446 | 0.66651 | 1955 | 358.3354 | -26.23544 | 0.67177 | 1955 | 354.8033 | -25.40697 | 0.72344 | 1955 | 354.9987 | -29.07511 | 0.71028 |
| 1956 | 354.3669 | -33.27921 | 0.673   | 1956 | 355.5852 | -24.7834  | 0.66568 | 1956 | 358.5355 | -26.26538 | 0.67107 | 1956 | 354.9423 | -25.43349 | 0.72267 | 1956 | 355.1803 | -29.07357 | 0.7095  |
| 1957 | 354.5429 | -33.28239 | 0.67179 | 1957 | 355.7375 | -24.81333 | 0.665   | 1957 | 358.6858 | -26.30177 | 0.67024 | 1957 | 355.1148 | -25.45435 | 0.72202 | 1957 | 355.3328 | -29.07753 | 0.70876 |
| 1958 | 354.6997 | -33.27565 | 0.67071 | 1958 | 355.9102 | -24.83969 | 0.66446 | 1958 | 358.8596 | -26.33291 | 0.66972 | 1958 | 355.2889 | -25.48483 | 0.72146 | 1958 | 355.5416 | -29.07542 | 0.70795 |
| 1959 | 354.902  | -33.26514 | 0.66965 | 1959 | 356.0612 | -24.87131 | 0.66388 | 1959 | 359.0259 | -26.3742  | 0.66923 | 1959 | 355.475  | -25.50612 | 0.72083 | 1959 | 355.6816 | -29.07375 | 0.70707 |
| 1960 | 355.0551 | -33.24557 | 0.66851 | 1960 | 356.2678 | -24.90064 | 0.66314 | 1960 | 359.2137 | -26.40693 | 0.66847 | 1960 | 355.6173 | -25.53502 | 0.72006 | 1960 | 355.8641 | -29.07695 | 0.70625 |
| 1961 | 355.2193 | -33.23609 | 0.66736 | 1961 | 356.4244 | -24.92868 | 0.66243 | 1961 | 359.3635 | -26.44557 | 0.66774 | 1961 | 355.7911 | -25.55781 | 0.71938 | 1961 | 356.0143 | -29.07893 | 0.70549 |
| 1962 | 355.3867 | -33.21548 | 0.66628 | 1962 | 356.5918 | -24.95536 | 0.66191 | 1962 | 359.5327 | -26.47886 | 0.66719 | 1962 | 355.9622 | -25.59013 | 0.7188  | 1962 | 356.2239 | -29.08446 | 0.70468 |
| 1963 | 355.5836 | -33.20689 | 0.66525 | 1963 | 356.7404 | -24.98609 | 0.66134 | 1963 | 359.6982 | -26.51994 | 0.66667 | 1963 | 356.1577 | -25.61335 | 0.7182  | 1963 | 356.3765 | -29.08214 | 0.70378 |
| 1964 | 355.7388 | -33.19198 | 0.66412 | 1964 | 356.9506 | -25.0177  | 0.66057 | 1964 | 359.8945 | -26.557   | 0.66594 | 1964 | 356.293  | -25.63906 | 0.71746 | 1964 | 356.5452 | -29.08814 | 0.70292 |
| 1965 | 355.9044 | -33.19081 | 0.66292 | 1965 | 357.0985 | -25.04596 | 0.65983 | 1965 | 360.0424 | -26.59636 | 0.66511 | 1965 | 356.4747 | -25.66493 | 0.71675 | 1965 | 356.6975 | -29.08943 | 0.70218 |
| 1966 | 356.0674 | -33.18907 | 0.66179 | 1966 | 357.2743 | -25.07496 | 0.65923 | 1966 | 360.2187 | -26.6355  | 0.66445 | 1966 | 356.6393 | -25.69318 | 0.71622 |      |          |           |         |

|      |          |           |         |      |          |           |         |      |          |           |         |      |          |           |         |      |          |           |         |
|------|----------|-----------|---------|------|----------|-----------|---------|------|----------|-----------|---------|------|----------|-----------|---------|------|----------|-----------|---------|
| 2028 | 366.6269 | -34.62156 | 0.58928 | 2028 | 367.7752 | -27.66594 | 0.614   | 2028 | 370.7085 | -29.46361 | 0.61781 | 2028 | 367.1342 | -27.69075 | 0.67399 | 2028 | 367.4434 | -29.69685 | 0.65447 |
| 2029 | 366.8124 | -34.66835 | 0.58815 | 2029 | 367.9413 | -27.72113 | 0.61326 | 2029 | 370.8855 | -29.51532 | 0.61705 | 2029 | 367.3068 | -27.72854 | 0.67333 | 2029 | 367.5852 | -29.71678 | 0.65367 |
| 2030 | 366.9575 | -34.70882 | 0.58693 | 2030 | 368.1437 | -27.77078 | 0.61243 | 2030 | 371.0661 | -29.55863 | 0.61619 | 2030 | 367.4465 | -27.77185 | 0.67262 | 2030 | 367.762  | -29.73815 | 0.65282 |
| 2031 | 367.1245 | -34.75687 | 0.58561 | 2031 | 368.2786 | -27.82327 | 0.61149 | 2031 | 371.2109 | -29.60678 | 0.61516 | 2031 | 367.6502 | -27.81807 | 0.67177 | 2031 | 367.9327 | -29.76325 | 0.65208 |
| 2032 | 367.3069 | -34.80363 | 0.58435 | 2032 | 368.4602 | -27.87585 | 0.61061 | 2032 | 371.3551 | -29.65391 | 0.61422 | 2032 | 367.8121 | -27.86221 | 0.67097 | 2032 | 368.1244 | -29.79075 | 0.65138 |
| 2033 | 367.4884 | -34.85337 | 0.5832  | 2033 | 368.6177 | -27.93259 | 0.60984 | 2033 | 371.5008 | -29.70642 | 0.61339 | 2033 | 367.9797 | -27.90229 | 0.67034 | 2033 | 368.2614 | -29.81348 | 0.65062 |
| 2034 | 367.6463 | -34.89597 | 0.58204 | 2034 | 368.8226 | -27.9879  | 0.60904 | 2034 | 371.742  | -29.75015 | 0.61256 | 2034 | 368.1233 | -27.94396 | 0.66963 | 2034 | 368.4008 | -29.84441 | 0.64975 |
| 2035 | 367.8067 | -34.94753 | 0.58075 | 2035 | 369.0624 | -28.03853 | 0.60813 | 2035 | 371.8838 | -29.80036 | 0.61156 | 2035 | 368.2885 | -27.99047 | 0.66878 | 2035 | 368.602  | -29.87596 | 0.64895 |
| 2036 | 367.9852 | -34.9982  | 0.57946 | 2036 | 369.1425 | -28.09342 | 0.60722 | 2036 | 372.0645 | -29.84624 | 0.6106  | 2036 | 368.4839 | -28.03169 | 0.66793 | 2036 | 368.7999 | -29.90674 | 0.64823 |
| 2037 | 368.1673 | -35.04952 | 0.57829 | 2037 | 369.2951 | -28.14563 | 0.60648 | 2037 | 372.2321 | -29.89652 | 0.60908 | 2037 | 368.6596 | -28.07429 | 0.66719 | 2037 | 368.9481 | -29.93319 | 0.64743 |
| 2038 | 368.3288 | -35.09568 | 0.57711 | 2038 | 369.4999 | -28.20085 | 0.60571 | 2038 | 372.4229 | -29.94132 | 0.60901 | 2038 | 368.8051 | -28.11081 | 0.66648 | 2038 | 369.1191 | -29.96421 | 0.64655 |
| 2039 | 368.4842 | -35.14592 | 0.57582 | 2039 | 369.6437 | -28.24926 | 0.60477 | 2039 | 372.5638 | -29.98492 | 0.60798 | 2039 | 369.0042 | -28.15999 | 0.66563 | 2039 | 369.2937 | -29.99458 | 0.64572 |
| 2040 | 368.6699 | -35.19425 | 0.57449 | 2040 | 369.8152 | -28.3031  | 0.60383 | 2040 | 372.7445 | -30.03142 | 0.60694 | 2040 | 369.1714 | -28.19901 | 0.66476 | 2040 | 369.4788 | -30.0259  | 0.645   |
| 2041 | 368.8441 | -35.23764 | 0.57328 | 2041 | 369.9755 | -28.35417 | 0.60301 | 2041 | 372.9086 | -30.07668 | 0.60607 | 2041 | 369.3395 | -28.2407  | 0.66402 | 2041 | 369.6332 | -30.04871 | 0.64422 |
| 2042 | 369.0082 | -35.27657 | 0.57212 | 2042 | 370.1732 | -28.40852 | 0.60221 | 2042 | 373.1064 | -30.12317 | 0.60524 | 2042 | 369.4859 | -28.28888 | 0.66333 | 2042 | 369.7932 | -30.07971 | 0.64337 |
| 2043 | 369.163  | -35.32106 | 0.57085 | 2043 | 370.3225 | -28.45643 | 0.60125 | 2043 | 373.2445 | -30.1601  | 0.60418 | 2043 | 369.6794 | -28.33131 | 0.66248 | 2043 | 369.9758 | -30.10728 | 0.64253 |
| 2044 | 369.344  | -35.363   | 0.56954 | 2044 | 370.4943 | -28.51117 | 0.60024 | 2044 | 373.421  | -30.20737 | 0.60308 | 2044 | 369.8483 | -28.37045 | 0.66161 | 2044 | 370.1568 | -30.1357  | 0.64179 |
| 2045 | 369.5194 | -35.40663 | 0.56831 | 2045 | 370.6531 | -28.56284 | 0.59945 | 2045 | 373.5884 | -30.2496  | 0.60214 | 2045 | 370.0129 | -28.41724 | 0.66081 | 2045 | 370.3104 | -30.15705 | 0.64101 |
| 2046 | 369.6956 | -35.44631 | 0.56716 | 2046 | 370.8463 | -28.61819 | 0.59865 | 2046 | 373.7805 | -30.29368 | 0.60128 | 2046 | 370.1698 | -28.45659 | 0.66008 | 2046 | 370.4699 | -30.18437 | 0.64012 |
| 2047 | 369.837  | -35.49035 | 0.5659  | 2047 | 371.0086 | -28.66725 | 0.59768 | 2047 | 373.9262 | -30.3314  | 0.60025 | 2047 | 370.349  | -28.5008  | 0.65925 | 2047 | 370.6556 | -30.2113  | 0.63926 |
| 2048 | 370.0229 | -35.53914 | 0.56458 | 2048 | 371.1664 | -28.7204  | 0.59666 | 2048 | 374.0966 | -30.37655 | 0.59911 | 2048 | 370.528  | -28.5513  | 0.6583  | 2048 | 370.8301 | -30.23934 | 0.63835 |
| 2049 | 370.1992 | -35.58943 | 0.56336 | 2049 | 371.3274 | -28.77258 | 0.59575 | 2049 | 374.2644 | -30.42019 | 0.59807 | 2049 | 370.6952 | -28.59814 | 0.65747 | 2049 | 370.9966 | -30.26261 | 0.63774 |
| 2050 | 370.3742 | -35.63658 | 0.56223 | 2050 | 371.5245 | -28.82901 | 0.59493 | 2050 | 374.4359 | -30.46653 | 0.59717 | 2050 | 370.8504 | -28.6376  | 0.65679 | 2050 | 371.1473 | -30.29214 | 0.63689 |
| 2051 | 370.517  | -35.68532 | 0.56101 | 2051 | 371.6847 | -28.87696 | 0.59396 | 2051 | 374.6128 | -30.50591 | 0.59614 | 2051 | 371.0279 | -28.68921 | 0.65599 | 2051 | 371.3329 | -30.323   | 0.63603 |
| 2052 | 370.7048 | -35.73928 | 0.5597  | 2052 | 371.8386 | -28.93489 | 0.59291 | 2052 | 374.7751 | -30.55209 | 0.59493 | 2052 | 371.2157 | -28.72975 | 0.65506 | 2052 | 371.5053 | -30.35399 | 0.63527 |
| 2053 | 370.8735 | -35.78859 | 0.55851 | 2053 | 372.0078 | -28.98821 | 0.59197 | 2053 | 374.9473 | -30.59893 | 0.59387 | 2053 | 371.3643 | -28.77575 | 0.65422 | 2053 | 371.679  | -30.3787  | 0.63453 |
| 2054 | 371.054  | -35.83728 | 0.55739 | 2054 | 372.1896 | -29.04516 | 0.59111 | 2054 | 375.1352 | -30.649   | 0.59294 | 2054 | 371.5323 | -28.81647 | 0.6535  | 2054 | 371.8236 | -30.40851 | 0.63368 |
| 2055 | 371.1953 | -35.88212 | 0.55618 | 2055 | 372.3627 | -29.09625 | 0.59018 | 2055 | 375.2855 | -30.69263 | 0.59194 | 2055 | 371.7015 | -28.86353 | 0.65271 | 2055 | 372.0129 | -30.4404  | 0.6328  |
| 2056 | 371.3745 | -35.93696 | 0.55487 | 2056 | 372.518  | -29.15368 | 0.58912 | 2056 | 375.4511 | -30.74377 | 0.59076 | 2056 | 371.8938 | -28.90471 | 0.65172 | 2056 | 372.1841 | -30.46961 | 0.63202 |
| 2057 | 371.5522 | -35.98527 | 0.55358 | 2057 | 372.6849 | -29.20606 | 0.58813 | 2057 | 375.6234 | -30.79423 | 0.58966 | 2057 | 372.0559 | -28.94899 | 0.65077 | 2057 | 372.3583 | -30.49615 | 0.63126 |
| 2058 | 371.7133 | -36.03432 | 0.55235 | 2058 | 372.8676 | -29.26435 | 0.58725 | 2058 | 375.8004 | -30.84417 | 0.58873 | 2058 | 372.2168 | -28.98758 | 0.65    | 2058 | 372.5082 | -30.5261  | 0.63039 |
| 2059 | 371.8745 | -36.08171 | 0.55106 | 2059 | 373.0506 | -29.31291 | 0.58628 | 2059 | 375.9695 | -30.89621 | 0.58776 | 2059 | 372.3722 | -29.03382 | 0.64921 | 2059 | 372.6929 | -30.55766 | 0.62949 |
| 2060 | 372.0529 | -36.13569 | 0.54965 | 2060 | 373.1892 | -29.36902 | 0.5852  | 2060 | 376.1246 | -30.94773 | 0.58659 | 2060 | 372.5764 | -29.07424 | 0.64825 | 2060 | 372.864  | -30.5883  | 0.62863 |
| 2061 | 372.2364 | -36.18368 | 0.54823 | 2061 | 373.3677 | -29.42094 | 0.58418 | 2061 | 376.2968 | -30.9987  | 0.58546 | 2061 | 372.7219 | -29.11837 | 0.64729 | 2061 | 373.0486 | -30.61636 | 0.62785 |
| 2062 | 372.4045 | -36.23253 | 0.5469  | 2062 | 373.5424 | -29.48052 | 0.58329 | 2062 | 376.4618 | -31.05172 | 0.58446 | 2062 | 372.8975 | -29.15857 | 0.64644 | 2062 | 373.1826 | -30.64397 | 0.62701 |
| 2063 | 372.5573 | -36.28006 | 0.54555 | 2063 | 373.7252 | -29.5314  | 0.58235 | 2063 | 376.6352 | -31.09614 | 0.58342 | 2063 | 373.0515 | -29.20776 | 0.64562 | 2063 | 373.3706 | -30.68018 | 0.62606 |
| 2064 | 372.7224 | -36.32444 | 0.54411 | 2064 | 373.8668 | -29.5871  | 0.58125 | 2064 | 376.7994 | -31.14682 | 0.58218 | 2064 | 373.2546 | -29.24845 | 0.64464 | 2064 | 373.5417 | -30.71085 | 0.6252  |
| 2065 | 372.9096 | -36.38486 | 0.54268 | 2065 | 374.043  | -29.64211 | 0.5802  | 2065 | 376.963  | -31.1985  | 0.58094 | 2065 | 373.4003 | -29.29295 | 0.64366 | 2065 | 373.7231 | -30.74003 | 0.62442 |
| 2066 | 373.0861 | -36.43651 | 0.54135 | 2066 | 374.2122 | -29.70386 | 0.57926 | 2066 | 377.1339 | -31.25067 | 0.57991 | 2066 | 373.5754 | -29.3357  | 0.64278 | 2066 | 373.8683 | -30.77313 | 0.6236  |
| 2067 | 373.2134 | -36.48502 | 0.54003 | 2067 | 374.4081 | -29.7598  | 0.57832 | 2067 | 377.3344 | -31.2979  | 0.57887 | 2067 | 373.7236 | -29.38298 | 0.64193 | 2067 | 374.0515 | -30.81152 | 0.62267 |
| 2068 | 373.3953 | -36.53837 | 0.5386  | 2068 | 374.5485 | -29.8136  | 0.57718 | 2068 | 377.4769 | -31.34997 | 0.57767 | 2068 | 373.9333 | -29.42951 | 0.64098 | 2068 | 374.2252 | -30.84296 | 0.62173 |
| 2069 | 373.591  | -36.59089 | 0.5372  | 2069 | 374.7246 | -29.87242 | 0.57607 | 2069 | 377.6534 | -31.401   | 0.57647 | 2069 | 374.0766 | -29.47452 | 0.63997 | 2069 | 374.4023 | -30.87611 | 0.62093 |
| 2070 | 373.7588 | -36.64275 | 0.53587 | 2070 | 374.894  | -29.92997 | 0.57508 | 2070 | 377.8333 | -31.45299 | 0.57536 | 2070 | 374.2509 | -29.52104 | 0.63903 | 2070 | 374.5559 | -30.90484 | 0.62009 |
| 2071 | 373.9167 | -36.69169 | 0.53456 | 2071 | 375.0868 | -29.98683 | 0.57408 | 2071 | 378.0193 | -31.49684 | 0.57433 | 2071 | 374.3986 | -29.56952 | 0.63819 | 2071 | 374.728  | -30.94274 | 0.61914 |
| 2072 | 374.0747 | -36.74809 | 0.53308 | 2072 | 375.2722 | -30.03705 | 0.57295 | 2072 | 378.152  | -31.54589 | 0.57312 | 2072 | 374.608  | -29.62031 | 0.63723 | 2072 | 374.9143 | -30.97368 | 0.61822 |
| 2073 | 374.261  | -36.80558 | 0.53163 | 2073 | 375.4066 | -30.09503 | 0.57178 | 2073 | 378.3377 | -31.59718 | 0.57185 | 2073 | 374.7549 | -29.66442 | 0.63619 | 2073 | 375.0857 | -31.00599 | 0.61738 |
| 2074 | 374.4375 | -36.86342 | 0.53027 | 2074 | 375.5672 | -30.14966 | 0.57067 | 2074 | 378.514  | -31.64687 | 0.57101 | 2074 | 374.9306 | -29.71691 | 0.63526 | 2074 | 375.2339 | -31.03421 | 0.61656 |
| 2075 | 374.6007 | -36.9137  | 0.52894 | 2075 | 375.7628 | -30.20878 | 0.56968 | 2075 | 378.6985 | -31.69426 | 0.56964 | 2075 | 375.0832 | -29.76341 | 0.63441 | 2075 | 375.403  | -31.07011 | 0.6156  |
| 2076 | 374.7441 | -36.96933 | 0.52752 | 2076 | 375.9092 | -30.25998 | 0.56854 | 2076 | 378.8427 | -31.73743 | 0.56841 | 2076 | 375.2846 | -29.81763 | 0.63348 | 2076 | 375.5908 | -31.10242 | 0.61461 |
| 2077 | 374.9433 | -37.02589 | 0.52603 | 2077 | 376.0777 | -30.31874 | 0.56732 | 2077 | 379.019  | -31.78645 | 0.5671  | 2077 | 375.4379 | -29.86334 | 0.63242 | 2077 | 375.7613 | -31.13849 | 0.61371 |
| 2078 | 375.109  | -37.07858 | 0.52465 | 2078 | 376.247  | -30.37816 | 0.56621 | 2078 | 379.1901 | -31.83453 | 0.56582 | 2078 | 375.605  | -29.91684 | 0.63138 | 2078 | 375.9197 | -31.17001 | 0.61283 |
| 2079 | 375.2769 | -37.12336 | 0.52336 | 2079 | 376.4364 | -30.43948 | 0.56522 | 2079 | 379.3771 | -31.88245 | 0.56468 | 2079 | 375.7588 | -29.96813 | 0.63048 |      |          |           |         |

|      |          |           |         |      |          |           |         |      |          |           |         |      |          |           |         |      |          |           |         |
|------|----------|-----------|---------|------|----------|-----------|---------|------|----------|-----------|---------|------|----------|-----------|---------|------|----------|-----------|---------|
| 2141 | 385.8091 | -39.22639 | 0.43425 | 2141 | 386.9281 | -34.33828 | 0.47603 | 2141 | 389.8821 | -35.08779 | 0.46509 | 2141 | 386.271  | -33.87611 | 0.54785 | 2141 | 386.5804 | -34.35776 | 0.53596 |
| 2142 | 385.9651 | -39.25695 | 0.43275 | 2142 | 387.0767 | -34.40086 | 0.47428 | 2142 | 390.0274 | -35.13752 | 0.46317 | 2142 | 386.4497 | -33.9562  | 0.54627 | 2142 | 386.7589 | -34.41512 | 0.53428 |
| 2143 | 386.1664 | -39.28387 | 0.43111 | 2143 | 387.2499 | -34.47278 | 0.47232 | 2143 | 390.2118 | -35.19803 | 0.46101 | 2143 | 386.5935 | -34.0337  | 0.54453 | 2143 | 386.9138 | -34.47881 | 0.53264 |
| 2144 | 386.324  | -39.3092  | 0.42953 | 2144 | 387.4338 | -34.53827 | 0.4704  | 2144 | 390.3878 | -35.24948 | 0.45885 | 2144 | 386.7671 | -34.11713 | 0.54265 | 2144 | 387.0734 | -34.53602 | 0.53111 |
| 2145 | 386.4918 | -39.33266 | 0.42805 | 2145 | 387.608  | -34.6028  | 0.46855 | 2145 | 390.5562 | -35.30606 | 0.45689 | 2145 | 386.9457 | -34.19788 | 0.54088 | 2145 | 387.2571 | -34.60613 | 0.52952 |
| 2146 | 386.6419 | -39.36289 | 0.42651 | 2146 | 387.7572 | -34.664   | 0.46674 | 2146 | 390.7083 | -35.35466 | 0.45497 | 2146 | 387.1287 | -34.28143 | 0.53919 | 2146 | 387.4351 | -34.66587 | 0.52778 |
| 2147 | 386.494  | -39.39054 | 0.4249  | 2147 | 387.9261 | -34.73461 | 0.46476 | 2147 | 390.8795 | -35.41421 | 0.4528  | 2147 | 387.274  | -34.35664 | 0.53742 | 2147 | 387.5887 | -34.7307  | 0.52604 |
| 2148 | 387.0008 | -39.41782 | 0.42334 | 2148 | 388.1152 | -34.79842 | 0.46278 | 2148 | 391.0663 | -35.46644 | 0.45058 | 2148 | 387.4435 | -34.44251 | 0.53548 | 2148 | 387.7528 | -34.7894  | 0.52442 |
| 2149 | 387.1717 | -39.44175 | 0.42184 | 2149 | 388.278  | -34.86361 | 0.46088 | 2149 | 391.2301 | -35.52338 | 0.44855 | 2149 | 387.6314 | -34.52548 | 0.53358 | 2149 | 387.9176 | -34.85942 | 0.52278 |
| 2150 | 387.3218 | -39.47004 | 0.42038 | 2150 | 388.4382 | -34.92449 | 0.45903 | 2150 | 391.3861 | -35.57505 | 0.44666 | 2150 | 387.8012 | -34.60735 | 0.53181 | 2150 | 388.113  | -34.92481 | 0.52098 |
| 2151 | 387.5269 | -39.50048 | 0.41878 | 2151 | 388.5996 | -34.99267 | 0.45705 | 2151 | 391.5467 | -35.63712 | 0.44436 | 2151 | 387.9554 | -34.68516 | 0.53001 | 2151 | 388.2634 | -34.99397 | 0.51919 |
| 2152 | 387.6806 | -39.52659 | 0.4172  | 2152 | 388.7932 | -35.05691 | 0.45493 | 2152 | 391.74   | -35.69366 | 0.4421  | 2152 | 388.1199 | -34.76748 | 0.528   | 2152 | 388.4257 | -35.06137 | 0.51751 |
| 2153 | 387.8554 | -39.55069 | 0.4157  | 2153 | 388.9599 | -35.12088 | 0.45295 | 2153 | 391.8933 | -35.75050 | 0.43997 | 2153 | 388.3054 | -34.85018 | 0.52601 | 2153 | 388.5883 | -35.14021 | 0.51579 |
| 2154 | 388.0004 | -39.57429 | 0.4142  | 2154 | 389.1216 | -35.18112 | 0.45102 | 2154 | 392.0553 | -35.81059 | 0.43792 | 2154 | 388.4771 | -34.93239 | 0.52413 | 2154 | 388.7862 | -35.21486 | 0.51395 |
| 2155 | 388.2101 | -39.60455 | 0.4126  | 2155 | 389.2717 | -35.24569 | 0.44895 | 2155 | 392.2099 | -35.87621 | 0.43569 | 2155 | 388.635  | -35.00938 | 0.52222 | 2155 | 388.9312 | -35.29533 | 0.51207 |
| 2156 | 388.3656 | -39.63103 | 0.41099 | 2156 | 389.4694 | -35.31245 | 0.44668 | 2156 | 392.4035 | -35.9381  | 0.43332 | 2156 | 388.7889 | -35.09238 | 0.52023 | 2156 | 389.1056 | -35.37878 | 0.51025 |
| 2157 | 388.5383 | -39.6591  | 0.40941 | 2157 | 389.6327 | -35.378   | 0.44476 | 2157 | 392.5615 | -36.00227 | 0.43109 | 2157 | 388.9811 | -35.17753 | 0.51814 | 2157 | 389.26   | -35.46688 | 0.50845 |
| 2158 | 388.685  | -39.68579 | 0.40791 | 2158 | 389.7975 | -35.44204 | 0.44281 | 2158 | 392.726  | -36.06483 | 0.42896 | 2158 | 389.1545 | -35.26278 | 0.51618 | 2158 | 389.463  | -35.55444 | 0.50658 |
| 2159 | 388.836  | -39.71859 | 0.40627 | 2159 | 389.946  | -35.50854 | 0.44077 | 2159 | 392.8745 | -36.13292 | 0.4267  | 2159 | 389.3123 | -35.34062 | 0.51427 | 2159 | 389.6043 | -35.64464 | 0.50458 |
| 2160 | 389.045  | -39.74546 | 0.4046  | 2160 | 390.1483 | -35.58073 | 0.43856 | 2160 | 393.0779 | -36.20072 | 0.42423 | 2160 | 389.4672 | -35.42483 | 0.51223 | 2160 | 389.7788 | -35.73548 | 0.50268 |
| 2161 | 389.2148 | -39.78092 | 0.40296 | 2161 | 390.3042 | -35.65189 | 0.43641 | 2161 | 393.2336 | -36.26911 | 0.42189 | 2161 | 389.6606 | -35.50959 | 0.51011 | 2161 | 389.9281 | -35.83243 | 0.50082 |
| 2162 | 389.3625 | -39.80592 | 0.40137 | 2162 | 390.4735 | -35.71809 | 0.43437 | 2162 | 393.3957 | -36.33321 | 0.41973 | 2162 | 389.8246 | -35.59315 | 0.50804 | 2162 | 390.1374 | -35.92517 | 0.49888 |
| 2163 | 389.5546 | -39.84368 | 0.39973 | 2163 | 390.6174 | -35.78804 | 0.43225 | 2163 | 393.5475 | -36.40194 | 0.4175  | 2163 | 389.9925 | -35.67003 | 0.50608 | 2163 | 390.2746 | -36.01867 | 0.49689 |
| 2164 | 389.7319 | -39.87211 | 0.398   | 2164 | 390.8189 | -35.86204 | 0.42998 | 2164 | 393.7454 | -36.46949 | 0.41507 | 2164 | 390.1385 | -35.75042 | 0.50398 | 2164 | 390.4571 | -36.11657 | 0.49491 |
| 2165 | 389.8875 | -39.90642 | 0.39623 | 2165 | 390.981  | -35.93303 | 0.42774 | 2165 | 393.8988 | -36.5357  | 0.4127  | 2165 | 390.3323 | -35.83518 | 0.50175 | 2165 | 390.5971 | -36.21478 | 0.49303 |
| 2166 | 390.0476 | -39.93714 | 0.39475 | 2166 | 391.1495 | -35.9991  | 0.42565 | 2166 | 394.0694 | -36.59844 | 0.41051 | 2166 | 390.498  | -35.91967 | 0.4996  | 2166 | 390.8079 | -36.31706 | 0.49107 |
| 2167 | 390.2325 | -39.9747  | 0.39309 | 2167 | 391.2907 | -36.06784 | 0.4235  | 2167 | 394.2107 | -36.65978 | 0.40824 | 2167 | 390.6672 | -35.99582 | 0.49759 | 2167 | 390.9541 | -36.41093 | 0.48988 |
| 2168 | 390.407  | -40.0053  | 0.39134 | 2168 | 391.4924 | -36.1438  | 0.42118 | 2168 | 394.4122 | -36.72691 | 0.40577 | 2168 | 390.811  | -36.07646 | 0.49546 | 2168 | 391.127  | -36.51374 | 0.48892 |
| 2169 | 390.5667 | -40.04153 | 0.38967 | 2169 | 391.6549 | -36.211   | 0.41885 | 2169 | 394.5738 | -36.78761 | 0.40331 | 2169 | 391.0084 | -36.16224 | 0.49318 | 2169 | 391.2748 | -36.61332 | 0.48696 |
| 2170 | 390.7316 | -40.07717 | 0.38802 | 2170 | 391.8286 | -36.27942 | 0.41667 | 2170 | 394.7409 | -36.84798 | 0.40097 | 2170 | 391.1704 | -36.2423  | 0.49097 | 2170 | 391.479  | -36.71182 | 0.48294 |
| 2171 | 390.8994 | -40.10978 | 0.38634 | 2171 | 391.9735 | -36.34179 | 0.41445 | 2171 | 394.8832 | -36.90734 | 0.39864 | 2171 | 391.3476 | -36.32232 | 0.48888 | 2171 | 391.6296 | -36.81603 | 0.48078 |
| 2172 | 391.0889 | -40.14456 | 0.38456 | 2172 | 392.1617 | -36.41565 | 0.41212 | 2172 | 395.0313 | -36.9684  | 0.3961  | 2172 | 391.494  | -36.39957 | 0.48673 | 2172 | 391.7954 | -36.92172 | 0.47866 |
| 2173 | 391.2441 | -40.1824  | 0.38277 | 2173 | 392.332  | -36.47993 | 0.40974 | 2173 | 395.2484 | -37.02722 | 0.39353 | 2173 | 391.6839 | -36.48624 | 0.48441 | 2173 | 391.9522 | -37.02559 | 0.47667 |
| 2174 | 391.4074 | -40.21452 | 0.38109 | 2174 | 392.5023 | -36.54673 | 0.40747 | 2174 | 395.4172 | -37.07867 | 0.39133 | 2174 | 391.8502 | -36.56599 | 0.4821  | 2174 | 392.1529 | -37.13597 | 0.47463 |
| 2175 | 391.5707 | -40.25632 | 0.37934 | 2175 | 392.6467 | -36.6063  | 0.40527 | 2175 | 395.5656 | -37.12624 | 0.38876 | 2175 | 392.0274 | -36.64533 | 0.47995 | 2175 | 392.3095 | -37.23467 | 0.47243 |
| 2176 | 391.7659 | -40.29194 | 0.3775  | 2176 | 392.8354 | -36.67939 | 0.40286 | 2176 | 395.7475 | -37.18204 | 0.38622 | 2176 | 392.1657 | -36.72112 | 0.47777 | 2176 | 392.4667 | -37.34257 | 0.47024 |
| 2177 | 391.9184 | -40.33273 | 0.37571 | 2177 | 393.0158 | -36.74209 | 0.40043 | 2177 | 395.9238 | -37.22736 | 0.38358 | 2177 | 392.3538 | -36.80656 | 0.47538 | 2177 | 392.625  | -37.44494 | 0.46814 |
| 2178 | 392.0856 | -40.36979 | 0.374   | 2178 | 393.1769 | -36.81016 | 0.39808 | 2178 | 396.0822 | -37.27461 | 0.38111 | 2178 | 392.5304 | -36.88207 | 0.47301 | 2178 | 392.8147 | -37.55869 | 0.46602 |
| 2179 | 392.2477 | -40.41509 | 0.37224 | 2179 | 393.3322 | -36.87123 | 0.39581 | 2179 | 396.2386 | -37.3139  | 0.37872 | 2179 | 392.6998 | -36.96116 | 0.47075 | 2179 | 392.9908 | -37.66302 | 0.46376 |
| 2180 | 392.4468 | -40.45641 | 0.3704  | 2180 | 393.508  | -36.9414  | 0.39338 | 2180 | 396.4151 | -37.36177 | 0.37614 | 2180 | 392.8484 | -37.0324  | 0.46849 | 2180 | 393.1409 | -37.77483 | 0.46149 |
| 2181 | 392.5937 | -40.5008  | 0.36857 | 2181 | 393.6914 | -37.00523 | 0.39083 | 2181 | 396.5975 | -37.40081 | 0.37347 | 2181 | 393.0257 | -37.11435 | 0.4661  | 2181 | 393.3023 | -37.88084 | 0.45931 |
| 2182 | 392.7678 | -40.5429  | 0.3668  | 2182 | 393.8527 | -37.06964 | 0.38837 | 2182 | 396.776  | -37.4444  | 0.3709  | 2182 | 393.2052 | -37.19015 | 0.46362 | 2182 | 393.4853 | -38.00072 | 0.45715 |
| 2183 | 392.9125 | -40.59015 | 0.36503 | 2183 | 394.011  | -37.12797 | 0.38602 | 2183 | 396.92   | -37.47861 | 0.36846 | 2183 | 393.3761 | -37.26847 | 0.46128 | 2183 | 393.6618 | -38.10852 | 0.45488 |
| 2184 | 393.123  | -40.63358 | 0.36315 | 2184 | 394.1779 | -37.19579 | 0.38353 | 2184 | 397.0886 | -37.52334 | 0.36585 | 2184 | 393.5234 | -37.34069 | 0.459   | 2184 | 393.8075 | -38.22355 | 0.45256 |
| 2185 | 393.2637 | -40.67675 | 0.36125 | 2185 | 394.3708 | -37.25688 | 0.38092 | 2185 | 397.2802 | -37.55874 | 0.36311 | 2185 | 393.7001 | -37.42323 | 0.45622 | 2185 | 393.9838 | -38.33463 | 0.45032 |
| 2186 | 393.4426 | -40.72136 | 0.35942 | 2186 | 394.526  | -37.31836 | 0.37841 | 2186 | 397.437  | -37.59606 | 0.36051 | 2186 | 393.8872 | -37.49824 | 0.45399 | 2186 | 394.1941 | -38.45444 | 0.44808 |
| 2187 | 393.5893 | -40.76932 | 0.35763 | 2187 | 394.6886 | -37.37579 | 0.37597 | 2187 | 397.6008 | -37.62653 | 0.358   | 2187 | 394.0486 | -37.576   | 0.45151 | 2187 | 394.3392 | -38.55544 | 0.44577 |
| 2188 | 393.7466 | -40.81638 | 0.35573 | 2188 | 394.851  | -37.4438  | 0.37348 | 2188 | 397.7564 | -37.66541 | 0.35543 | 2188 | 394.2098 | -37.64805 | 0.44912 | 2188 | 394.4836 | -38.68593 | 0.44335 |
| 2189 | 393.9499 | -40.86041 | 0.3538  | 2189 | 395.048  | -37.50172 | 0.37082 | 2189 | 397.9157 | -37.6973  | 0.35262 | 2189 | 394.375  | -37.72902 | 0.44664 | 2189 | 394.6552 | -38.80074 | 0.441   |
| 2190 | 394.1247 | -40.90733 | 0.35196 | 2190 | 395.1955 | -37.56342 | 0.36819 | 2190 | 398.1071 | -37.72824 | 0.34988 | 2190 | 394.5707 | -37.80272 | 0.444   | 2190 | 394.8213 | -38.92189 | 0.43872 |
| 2191 | 394.2688 | -40.95311 | 0.35015 | 2191 | 395.3702 | -37.62244 | 0.3657  | 2191 | 398.2752 | -37.75771 | 0.34734 | 2191 | 394.7231 | -37.8784  | 0.44147 | 2191 | 395.0172 | -39.03571 | 0.43634 |
| 2192 | 394.4793 | -41.00406 | 0.34827 | 2192 | 395.5186 | -37.68712 | 0.36315 | 2192 | 398.4293 | -37.79327 | 0.3447  | 2192 | 394.8937 | -37.94688 | 0.43902 | 2192 | 395.1548 | -39       |         |

|      |          |           |         |      |          |           |         |      |          |           |         |      |          |           |         |      |          |           |         |
|------|----------|-----------|---------|------|----------|-----------|---------|------|----------|-----------|---------|------|----------|-----------|---------|------|----------|-----------|---------|
| 2254 | 404.9795 | -43.96831 | 0.21337 | 2254 | 405.9573 | -41.56907 | 0.17618 | 2254 | 408.901  | -38.88541 | 0.16698 | 2254 | 405.4345 | -41.05277 | 0.2597  | 2254 | 405.5016 | -49.53465 | 0.26607 |
| 2255 | 405.1197 | -44.00085 | 0.21095 | 2255 | 406.1462 | -41.64771 | 0.17274 | 2255 | 409.0933 | -38.87802 | 0.16407 | 2255 | 405.6224 | -41.0806  | 0.25673 | 2255 | 405.6807 | -49.66843 | 0.2632  |
| 2256 | 405.2995 | -44.03283 | 0.20852 | 2256 | 406.2833 | -41.73054 | 0.1692  | 2256 | 409.2423 | -38.87469 | 0.16109 | 2256 | 405.7921 | -41.09751 | 0.25364 | 2256 | 405.8503 | -49.7984  | 0.26038 |
| 2257 | 405.4481 | -44.06438 | 0.2062  | 2257 | 406.4586 | -41.81151 | 0.16581 | 2257 | 409.4135 | -38.86478 | 0.15828 | 2257 | 405.9455 | -41.12346 | 0.25045 | 2257 | 406.0262 | -49.91721 | 0.25763 |
| 2258 | 405.6655 | -44.09788 | 0.20387 | 2258 | 406.6245 | -41.89778 | 0.16247 | 2258 | 409.5791 | -38.85637 | 0.1556  | 2258 | 406.1195 | -41.14285 | 0.24738 | 2258 | 406.1706 | -50.03262 | 0.25475 |
| 2259 | 405.7994 | -44.12283 | 0.20143 | 2259 | 406.8162 | -41.97581 | 0.159   | 2259 | 409.778  | -38.85329 | 0.15276 | 2259 | 406.2995 | -41.16982 | 0.24444 | 2259 | 406.349  | -50.1443  | 0.25186 |
| 2260 | 405.9641 | -44.15464 | 0.19901 | 2260 | 406.958  | -42.05433 | 0.15543 | 2260 | 409.9192 | -38.84491 | 0.14984 | 2260 | 406.4763 | -41.18382 | 0.24142 | 2260 | 406.5253 | -50.24956 | 0.24902 |
| 2261 | 406.1276 | -44.18662 | 0.19669 | 2261 | 407.1323 | -42.12872 | 0.15198 | 2261 | 410.0985 | -38.83324 | 0.147   | 2261 | 406.6287 | -41.20329 | 0.23827 | 2261 | 406.7033 | -50.34371 | 0.24623 |
| 2262 | 406.3282 | -44.21694 | 0.19436 | 2262 | 407.2941 | -42.20707 | 0.14864 | 2262 | 410.2505 | -38.82496 | 0.14432 | 2262 | 406.7997 | -41.21867 | 0.23523 | 2262 | 406.845  | -50.43275 | 0.24345 |
| 2263 | 406.4789 | -44.24005 | 0.19194 | 2263 | 407.4955 | -42.27782 | 0.14522 | 2263 | 410.4553 | -38.81276 | 0.14158 | 2263 | 406.9779 | -41.23598 | 0.23229 | 2263 | 407.0296 | -50.51934 | 0.24044 |
| 2264 | 406.6476 | -44.26944 | 0.18948 | 2264 | 407.6333 | -42.34436 | 0.14166 | 2264 | 410.5973 | -38.79684 | 0.13867 | 2264 | 407.1639 | -41.24399 | 0.22935 | 2264 | 407.2045 | -50.59647 | 0.23759 |
| 2265 | 406.8076 | -44.29527 | 0.18712 | 2265 | 407.8124 | -42.40849 | 0.13821 | 2265 | 410.7745 | -38.78511 | 0.13586 | 2265 | 407.3051 | -41.25649 | 0.22622 | 2265 | 407.3848 | -50.66586 | 0.23483 |
| 2266 | 406.9994 | -44.32665 | 0.18481 | 2266 | 407.9694 | -42.47096 | 0.13487 | 2266 | 410.9254 | -38.77177 | 0.13315 | 2266 | 407.4822 | -41.26232 | 0.22315 | 2266 | 407.5276 | -50.7248  | 0.23202 |
| 2267 | 407.1601 | -44.34831 | 0.18239 | 2267 | 408.1724 | -42.52731 | 0.13151 | 2267 | 411.1311 | -38.76162 | 0.13044 | 2267 | 407.6585 | -41.27352 | 0.22024 | 2267 | 407.7025 | -50.78455 | 0.22912 |
| 2268 | 407.3203 | -44.38002 | 0.17993 | 2268 | 408.3195 | -42.57546 | 0.12798 | 2268 | 411.2751 | -38.74103 | 0.12753 | 2268 | 407.8494 | -41.27421 | 0.21731 | 2268 | 407.8821 | -50.83418 | 0.22631 |
| 2269 | 407.4793 | -44.40855 | 0.17751 | 2269 | 408.4959 | -42.62022 | 0.1245  | 2269 | 411.4486 | -38.72884 | 0.12472 | 2269 | 407.9931 | -41.27667 | 0.21421 | 2269 | 408.063  | -50.88064 | 0.22357 |
| 2270 | 407.6704 | -44.44393 | 0.17516 | 2270 | 408.649  | -42.65799 | 0.12113 | 2270 | 411.602  | -38.71305 | 0.12211 | 2270 | 408.1715 | -41.27754 | 0.21111 | 2270 | 408.2057 | -50.91721 | 0.22082 |
| 2271 | 407.836  | -44.46829 | 0.1728  | 2271 | 408.8528 | -42.69058 | 0.11779 | 2271 | 411.8048 | -38.70059 | 0.11947 | 2271 | 408.3416 | -41.28083 | 0.20817 | 2271 | 408.3798 | -50.95723 | 0.21796 |
| 2272 | 407.987  | -44.5034  | 0.17036 | 2272 | 408.9991 | -42.70744 | 0.11434 | 2272 | 411.9587 | -38.68048 | 0.11669 | 2272 | 408.5374 | -41.27983 | 0.20526 | 2272 | 408.5614 | -50.9897  | 0.21515 |
| 2273 | 408.1579 | -44.53055 | 0.16801 | 2273 | 409.1722 | -42.72311 | 0.11095 | 2273 | 412.1278 | -38.66385 | 0.11395 | 2273 | 408.6726 | -41.27538 | 0.20221 | 2273 | 408.7396 | -51.01763 | 0.21245 |
| 2274 | 408.3439 | -44.56256 | 0.16573 | 2274 | 409.3375 | -42.72656 | 0.10767 | 2274 | 412.2815 | -38.6431  | 0.11142 | 2274 | 408.8531 | -41.27564 | 0.19914 | 2274 | 408.8919 | -51.03506 | 0.20974 |
| 2275 | 408.5168 | -44.58263 | 0.16338 | 2275 | 409.5342 | -42.72179 | 0.10448 | 2275 | 412.4787 | -38.62592 | 0.10887 | 2275 | 409.0235 | -41.27336 | 0.19626 | 2275 | 409.0619 | -51.05191 | 0.20692 |
| 2276 | 408.6729 | -44.60653 | 0.161   | 2276 | 409.6889 | -42.70186 | 0.10111 | 2276 | 412.6394 | -38.60911 | 0.10617 | 2276 | 409.2112 | -41.27113 | 0.19343 | 2276 | 409.2461 | -51.06355 | 0.20413 |
| 2277 | 408.844  | -44.61984 | 0.15864 | 2277 | 409.8583 | -42.67719 | 0.09778 | 2277 | 412.7971 | -38.57104 | 0.10343 | 2277 | 409.356  | -41.26112 | 0.19047 | 2277 | 409.4236 | -51.06667 | 0.20145 |
| 2278 | 409.0211 | -44.63639 | 0.15633 | 2278 | 410.0207 | -42.6418  | 0.09461 | 2278 | 412.9615 | -38.53991 | 0.10092 | 2278 | 409.5266 | -41.25709 | 0.18745 | 2278 | 409.5825 | -51.0574  | 0.19878 |
| 2279 | 409.2094 | -44.63934 | 0.15398 | 2279 | 410.2181 | -42.59949 | 0.09152 | 2279 | 413.1558 | -38.51297 | 0.09842 | 2279 | 409.6957 | -41.25104 | 0.18456 | 2279 | 409.7371 | -51.04924 | 0.19602 |
| 2280 | 409.3464 | -44.64088 | 0.15154 | 2280 | 410.3871 | -42.53847 | 0.08841 | 2280 | 413.3254 | -38.47222 | 0.09581 | 2280 | 409.8997 | -41.24661 | 0.18179 | 2280 | 409.9293 | -51.03421 | 0.19329 |
| 2281 | 409.5179 | -44.63799 | 0.14916 | 2281 | 410.5442 | -42.47134 | 0.08524 | 2281 | 413.4831 | -38.43603 | 0.09314 | 2281 | 410.0404 | -41.23481 | 0.17894 | 2281 | 410.1038 | -51.01402 | 0.19065 |
| 2282 | 409.6862 | -44.64166 | 0.14689 | 2282 | 410.7174 | -42.39148 | 0.08227 | 2282 | 413.648  | -38.39022 | 0.09067 | 2282 | 410.2055 | -41.22911 | 0.17597 | 2282 | 410.2624 | -50.98293 | 0.18805 |
| 2283 | 409.8804 | -44.63948 | 0.14457 | 2283 | 410.9153 | -42.30157 | 0.07944 | 2283 | 413.8328 | -38.34989 | 0.0883  | 2283 | 410.3876 | -41.22239 | 0.17311 | 2283 | 410.4204 | -50.95589 | 0.18536 |
| 2284 | 410.0191 | -44.64302 | 0.14217 | 2284 | 411.0918 | -42.18648 | 0.07653 | 2284 | 414.0173 | -38.29614 | 0.08577 | 2284 | 410.5676 | -41.21653 | 0.17037 | 2284 | 410.6092 | -50.92447 | 0.18262 |
| 2285 | 410.1987 | -44.65014 | 0.13978 | 2285 | 411.2471 | -42.06209 | 0.07356 | 2285 | 414.1649 | -38.24441 | 0.08309 | 2285 | 410.7202 | -41.2036  | 0.16757 | 2285 | 410.7786 | -50.89155 | 0.18001 |
| 2286 | 410.3608 | -44.66255 | 0.13752 | 2286 | 411.4278 | -41.91276 | 0.07073 | 2286 | 414.3341 | -38.1858  | 0.08062 | 2286 | 410.8855 | -41.19368 | 0.16466 | 2286 | 410.9533 | -50.84803 | 0.17739 |
| 2287 | 410.5575 | -44.67477 | 0.13523 | 2287 | 411.6151 | -41.74652 | 0.06807 | 2287 | 414.5145 | -38.13048 | 0.07829 | 2287 | 411.0598 | -41.18263 | 0.16188 | 2287 | 411.1016 | -50.8069  | 0.17476 |
| 2288 | 410.7002 | -44.68676 | 0.13283 | 2288 | 411.8036 | -41.55301 | 0.06541 | 2288 | 414.7034 | -38.06305 | 0.07589 | 2288 | 411.2424 | -41.17071 | 0.15908 | 2288 | 411.2977 | -50.76399 | 0.17204 |
| 2289 | 410.8772 | -44.70204 | 0.13042 | 2289 | 411.9574 | -41.34217 | 0.06269 | 2289 | 414.8443 | -37.99333 | 0.07335 | 2289 | 411.4086 | -41.15143 | 0.15636 | 2289 | 411.4681 | -50.71729 | 0.16941 |
| 2290 | 411.039  | -44.71602 | 0.12817 | 2290 | 412.1341 | -41.10822 | 0.06009 | 2290 | 415.0271 | -37.91637 | 0.07095 | 2290 | 411.5651 | -41.13263 | 0.15351 | 2290 | 411.6384 | -50.68822 | 0.16687 |
| 2291 | 411.2398 | -44.73045 | 0.12591 | 2291 | 412.3186 | -40.86488 | 0.05771 | 2291 | 415.1962 | -37.83959 | 0.06878 | 2291 | 411.7428 | -41.11513 | 0.15068 | 2291 | 411.7857 | -50.60032 | 0.16427 |
| 2292 | 411.3805 | -44.73626 | 0.12356 | 2292 | 412.5152 | -40.59807 | 0.05533 | 2292 | 415.3948 | -37.75305 | 0.06659 | 2292 | 411.9257 | -41.09565 | 0.14804 | 2292 | 411.9841 | -50.53863 | 0.16162 |
| 2293 | 411.5563 | -44.74603 | 0.12122 | 2293 | 412.6541 | -40.32294 | 0.05287 | 2293 | 415.5386 | -37.66017 | 0.06429 | 2293 | 412.0945 | -41.06631 | 0.1454  | 2293 | 412.149  | -50.47085 | 0.15904 |
| 2294 | 411.7211 | -44.75106 | 0.11895 | 2294 | 412.843  | -40.03575 | 0.05055 | 2294 | 415.7199 | -37.56218 | 0.06196 | 2294 | 412.2469 | -41.0415  | 0.14263 | 2294 | 412.3282 | -50.39652 | 0.15655 |
| 2295 | 411.9157 | -44.75785 | 0.11678 | 2295 | 413.0193 | -39.74789 | 0.04837 | 2295 | 415.8825 | -37.4616  | 0.0599  | 2295 | 412.4305 | -41.01271 | 0.13988 | 2295 | 412.4746 | -50.31548 | 0.15405 |
| 2296 | 412.0674 | -44.75189 | 0.11445 | 2296 | 413.2194 | -39.44626 | 0.0463  | 2296 | 416.0906 | -37.35826 | 0.05784 | 2296 | 412.6059 | -40.98207 | 0.13729 | 2296 | 412.6662 | -50.23516 | 0.15147 |
| 2297 | 412.2345 | -44.75028 | 0.11213 | 2297 | 413.369  | -39.14104 | 0.04415 | 2297 | 416.2272 | -37.24293 | 0.05561 | 2297 | 412.7809 | -40.94911 | 0.13479 | 2297 | 412.8395 | -50.14436 | 0.14896 |
| 2298 | 412.3986 | -44.74397 | 0.10988 | 2298 | 413.5578 | -38.83209 | 0.04208 | 2298 | 416.4103 | -37.13054 | 0.05345 | 2298 | 412.9312 | -40.90231 | 0.13213 | 2298 | 413.0196 | -50.05022 | 0.14656 |
| 2299 | 412.5957 | -44.73844 | 0.10769 | 2299 | 413.7243 | -38.52429 | 0.04021 | 2299 | 416.5721 | -37.01384 | 0.05156 | 2299 | 413.1077 | -40.86141 | 0.12946 | 2299 | 413.1675 | -49.94364 | 0.14417 |
| 2300 | 412.7521 | -44.71883 | 0.10542 | 2300 | 413.9306 | -38.21463 | 0.0384  | 2300 | 416.7726 | -36.89701 | 0.04967 | 2300 | 413.2885 | -40.81884 | 0.1269  | 2300 | 413.3584 | -49.84261 | 0.14167 |
| 2301 | 412.9189 | -44.70332 | 0.10307 | 2301 | 414.0786 | -37.89853 | 0.0365  | 2301 | 416.9209 | -36.77233 | 0.04765 | 2301 | 413.4669 | -40.76976 | 0.12443 | 2301 | 413.5393 | -49.72347 | 0.13921 |
| 2302 | 413.0898 | -44.68152 | 0.10082 | 2302 | 414.2612 | -37.58851 | 0.03468 | 2302 | 417.0983 | -36.65156 | 0.04562 | 2302 | 413.6103 | -40.71898 | 0.12184 | 2302 | 413.7117 | -49.60036 | 0.13688 |
| 2303 | 413.2727 | -44.65618 | 0.09863 | 2303 | 414.4338 | -37.27619 | 0.03304 | 2303 | 417.2582 | -36.52902 | 0.04384 | 2303 | 413.7964 | -40.67134 | 0.1192  | 2303 | 413.8692 | -49.4631  | 0.13456 |
| 2304 | 413.4427 | -44.61694 | 0.0964  | 2304 | 414.636  | -36.96879 | 0.03154 | 2304 | 417.4606 | -36.40816 | 0.04212 | 2304 | 413.9771 | -40.61664 | 0.11676 | 2304 | 414.0507 | -49.32642 | 0.13215 |
| 2305 | 413.5987 | -44.58038 | 0.09412 | 2305 | 414.7852 | -36.65692 | 0.02998 | 2305 | 417.6179 | -36.27653 | 0.04026 | 2305 | 414.155  |           |         |      |          |           |         |

|      |          |           |         |      |          |           |           |      |          |           |          |      |          |           |         |      |          |           |           |
|------|----------|-----------|---------|------|----------|-----------|-----------|------|----------|-----------|----------|------|----------|-----------|---------|------|----------|-----------|-----------|
| 2367 | 424.3704 | -32.56935 | 0.0102  | 2367 | 425.3908 | -30.78026 | -1.36E-04 | 2367 | 428.1932 | -32.43202 | -0.00344 | 2367 | 424.8945 | -32.09921 | 0.01466 | 2367 | 425.0802 | -33.87426 | 0.02623   |
| 2368 | 424.5501 | -32.44103 | 0.00979 | 2368 | 425.5627 | -30.83372 | -3.70E-04 | 2368 | 428.36   | -32.4807  | -0.00369 | 2368 | 425.0399 | -31.94253 | 0.01414 | 2368 | 425.2451 | -33.71668 | 0.02525   |
| 2369 | 424.7305 | -32.32433 | 0.00951 | 2369 | 425.7393 | -30.88469 | -5.17E-04 | 2369 | 428.5369 | -32.53015 | -0.0039  | 2369 | 425.2539 | -31.79272 | 0.01348 | 2369 | 425.4038 | -33.55817 | 0.02439   |
| 2370 | 424.8936 | -32.21004 | 0.00922 | 2370 | 425.9108 | -30.93954 | -5.25E-04 | 2370 | 428.7144 | -32.58202 | -0.00395 | 2370 | 425.4079 | -31.64191 | 0.01282 | 2370 | 425.6001 | -33.41095 | 0.02348   |
| 2371 | 425.0487 | -32.11399 | 0.00883 | 2371 | 426.0514 | -30.99584 | -5.60E-04 | 2371 | 428.8736 | -32.62777 | -0.00406 | 2371 | 425.5817 | -31.50157 | 0.0123  | 2371 | 425.7725 | -33.25546 | 0.02248   |
| 2372 | 425.2301 | -32.02642 | 0.00848 | 2372 | 426.2191 | -31.06257 | -7.66E-04 | 2372 | 429.0305 | -32.68032 | -0.00434 | 2372 | 425.7305 | -31.36062 | 0.01189 | 2372 | 425.9352 | -33.10626 | 0.02156   |
| 2373 | 425.4094 | -31.94893 | 0.00823 | 2373 | 426.3965 | -31.13282 | -8.85E-04 | 2373 | 429.2048 | -32.7356  | -0.00456 | 2373 | 425.9385 | -31.23554 | 0.01139 | 2373 | 426.1012 | -32.95099 | 0.02078   |
| 2374 | 425.5798 | -31.87458 | 0.00799 | 2374 | 426.5635 | -31.20991 | -9.65E-04 | 2374 | 429.3847 | -32.79637 | -0.00457 | 2374 | 426.096  | -31.10772 | 0.01081 | 2374 | 426.2877 | -32.80955 | 0.01997   |
| 2375 | 425.7296 | -31.81473 | 0.00766 | 2375 | 426.7153 | -31.2892  | -8.72E-04 | 2375 | 429.5435 | -32.84829 | -0.00461 | 2375 | 426.2693 | -30.99357 | 0.0104  | 2375 | 426.467  | -32.65945 | 0.01907   |
| 2376 | 425.9123 | -31.76491 | 0.00733 | 2376 | 426.8693 | -31.37757 | -0.00105  | 2376 | 429.695  | -32.91157 | -0.00482 | 2376 | 426.4177 | -30.87772 | 0.01009 | 2376 | 426.6261 | -32.51458 | 0.01821   |
| 2377 | 426.0873 | -31.72194 | 0.00709 | 2377 | 427.0535 | -31.47247 | -0.0012   | 2377 | 429.8787 | -32.97739 | -0.00501 | 2377 | 426.6202 | -30.78008 | 0.00968 | 2377 | 426.7892 | -32.36649 | 0.01751   |
| 2378 | 426.2597 | -31.67954 | 0.00695 | 2378 | 427.2214 | -31.57116 | -0.00121  | 2378 | 430.0533 | -33.04282 | -0.00502 | 2378 | 426.7895 | -30.67996 | 0.00921 | 2378 | 426.9681 | -32.23344 | 0.0168    |
| 2379 | 426.4032 | -31.65012 | 0.0067  | 2379 | 427.3709 | -31.66522 | -0.00118  | 2379 | 430.222  | -33.10698 | -0.00503 | 2379 | 426.9448 | -30.59169 | 0.0088  | 2379 | 427.1604 | -32.0937  | 0.016     |
| 2380 | 426.5893 | -31.6302  | 0.00643 | 2380 | 427.5249 | -31.76936 | -0.00136  | 2380 | 430.3726 | -33.1767  | -0.00521 | 2380 | 427.1056 | -30.5058  | 0.00854 | 2380 | 427.3097 | -31.96081 | 0.01522   |
| 2381 | 426.7568 | -31.61423 | 0.00623 | 2381 | 427.7161 | -31.87208 | -0.00157  | 2381 | 430.5472 | -33.2478  | -0.00542 | 2381 | 427.3012 | -30.43742 | 0.00823 | 2381 | 427.4836 | -31.82498 | 0.01454   |
| 2382 | 426.9364 | -31.60102 | 0.00613 | 2382 | 427.8749 | -31.97626 | -0.0016   | 2382 | 430.723  | -33.322   | -0.0055  | 2382 | 427.4722 | -30.3624  | 0.00782 | 2382 | 427.6545 | -31.70134 | 0.01391   |
| 2383 | 427.0783 | -31.59493 | 0.00595 | 2383 | 428.0357 | -32.07572 | -0.00158  | 2383 | 430.8989 | -33.39063 | -0.0055  | 2383 | 427.6316 | -30.29914 | 0.00746 | 2383 | 427.8531 | -31.57533 | 0.01317   |
| 2384 | 427.2536 | -31.60209 | 0.00571 | 2384 | 428.1833 | -32.17838 | -0.0017   | 2384 | 431.0365 | -33.46587 | -0.00562 | 2384 | 427.7915 | -30.23615 | 0.00727 | 2384 | 428.0027 | -31.45416 | 0.01243   |
| 2385 | 427.4323 | -31.61522 | 0.00554 | 2385 | 428.3704 | -32.28207 | -0.00188  | 2385 | 431.2207 | -33.54342 | -0.00583 | 2385 | 427.9708 | -30.18947 | 0.00704 | 2385 | 428.1805 | -31.32894 | 0.0118    |
| 2386 | 427.6162 | -31.63284 | 0.00542 | 2386 | 428.5326 | -32.38564 | -0.00194  | 2386 | 431.3903 | -33.62311 | -0.00591 | 2386 | 428.1612 | -30.1382  | 0.00671 | 2386 | 428.3389 | -31.21645 | 0.01124   |
| 2387 | 427.7498 | -31.65221 | 0.00528 | 2387 | 428.696  | -32.48334 | -0.00184  | 2387 | 431.5673 | -33.69967 | -0.00585 | 2387 | 428.3107 | -30.09626 | 0.00637 | 2387 | 428.5424 | -31.09853 | 0.01062   |
| 2388 | 427.9323 | -31.68587 | 0.00502 | 2388 | 428.8338 | -32.5834  | -0.00185  | 2388 | 431.71   | -33.77669 | -0.00596 | 2388 | 428.4718 | -30.05327 | 0.00618 | 2388 | 428.6845 | -30.98698 | 0.00997   |
| 2389 | 428.1057 | -31.71989 | 0.00485 | 2389 | 429.0282 | -32.68598 | -0.002    | 2389 | 431.8929 | -33.85941 | -0.00614 | 2389 | 428.6476 | -30.0259  | 0.00603 | 2389 | 428.8651 | -30.87431 | 0.00943   |
| 2390 | 428.2813 | -31.75438 | 0.00476 | 2390 | 429.1914 | -32.78417 | -0.00203  | 2390 | 432.0644 | -33.94038 | -0.00626 | 2390 | 428.8377 | -29.9637  | 0.00573 | 2390 | 429.0219 | -30.77211 | 0.00895   |
| 2391 | 428.4282 | -31.79289 | 0.00462 | 2391 | 429.3539 | -32.87864 | -0.00198  | 2391 | 432.2483 | -34.01856 | -0.0062  | 2391 | 428.9881 | -29.97514 | 0.00542 | 2391 | 429.2246 | -30.66802 | 0.00842   |
| 2392 | 428.5965 | -31.84104 | 0.00443 | 2392 | 429.4943 | -32.97398 | -0.00202  | 2392 | 432.3867 | -34.09444 | -0.00627 | 2392 | 429.1564 | -29.95303 | 0.00525 | 2392 | 429.3664 | -30.56866 | 0.00786   |
| 2393 | 428.7718 | -31.88894 | 0.00427 | 2393 | 429.6829 | -33.07242 | -0.00225  | 2393 | 432.5577 | -34.17788 | -0.00649 | 2393 | 429.3213 | -29.94608 | 0.00516 | 2393 | 429.5487 | -30.47231 | 0.00734   |
| 2394 | 428.951  | -31.94057 | 0.00422 | 2394 | 429.8425 | -33.16652 | -0.0024   | 2394 | 432.7401 | -34.258   | -0.0066  | 2394 | 429.5152 | -29.93803 | 0.00494 | 2394 | 429.6957 | -30.37921 | 0.00689   |
| 2395 | 429.1001 | -31.99077 | 0.0042  | 2395 | 430.0217 | -33.26032 | -0.00238  | 2395 | 432.9159 | -34.33782 | -0.00658 | 2395 | 429.6584 | -29.93884 | 0.00463 | 2395 | 429.909  | -30.29208 | 0.00643   |
| 2396 | 429.2618 | -32.05127 | 0.00402 | 2396 | 430.1617 | -33.34629 | -0.00242  | 2396 | 433.0606 | -34.41489 | -0.00662 | 2396 | 429.834  | -29.93848 | 0.00446 | 2396 | 430.0585 | -30.20001 | 0.00591   |
| 2397 | 429.4358 | -32.11321 | 0.0039  | 2397 | 430.342  | -33.44066 | -0.00259  | 2397 | 433.2293 | -34.49928 | -0.00687 | 2397 | 429.884  | -29.95058 | 0.00437 | 2397 | 430.2298 | -30.11994 | 0.00544   |
| 2398 | 429.6259 | -32.17503 | 0.00388 | 2398 | 430.5129 | -33.52709 | -0.00274  | 2398 | 433.4076 | -34.58018 | -0.00705 | 2398 | 430.1947 | -29.96404 | 0.00418 | 2398 | 430.3882 | -30.03979 | 0.00506   |
| 2399 | 429.7977 | -32.23329 | 0.00382 | 2399 | 430.68   | -33.61305 | -0.00269  | 2399 | 433.5809 | -34.66339 | -0.00699 | 2399 | 430.3315 | -29.97878 | 0.00392 | 2399 | 430.5919 | -29.96711 | 0.00467   |
| 2400 | 429.9381 | -32.30006 | 0.00367 | 2400 | 430.8259 | -33.69332 | -0.00267  | 2400 | 433.7352 | -34.7434  | -0.00703 | 2400 | 430.5092 | -30.00041 | 0.00375 | 2400 | 430.742  | -29.89274 | 0.00419   |
| 2401 | 430.1229 | -32.36608 | 0.00354 | 2401 | 431.0033 | -33.78181 | -0.00282  | 2401 | 433.8929 | -34.82786 | -0.00721 | 2401 | 430.6666 | -30.02689 | 0.00369 | 2401 | 430.9101 | -29.82895 | 0.00377   |
| 2402 | 430.2954 | -32.4346  | 0.00347 | 2402 | 431.1792 | -33.85852 | -0.00294  | 2402 | 434.079  | -34.91397 | -0.00736 | 2402 | 430.8669 | -30.05583 | 0.0036  | 2402 | 431.0689 | -29.76858 | 0.00342   |
| 2403 | 430.4621 | -32.49576 | 0.00345 | 2403 | 431.344  | -33.93791 | -0.00298  | 2403 | 434.2579 | -35.00151 | -0.00733 | 2403 | 431.0095 | -30.08419 | 0.00335 | 2403 | 431.2636 | -29.71949 | 0.00309   |
| 2404 | 430.6064 | -32.56415 | 0.00333 | 2404 | 431.4932 | -34.00941 | -0.00295  | 2404 | 434.4068 | -35.08713 | -0.00734 | 2404 | 431.1882 | -30.12087 | 0.00323 | 2404 | 431.4237 | -29.66551 | 0.00267   |
| 2405 | 430.7934 | -32.63721 | 0.00319 | 2405 | 431.6583 | -34.09007 | -0.00313  | 2405 | 434.5589 | -35.16921 | -0.00756 | 2405 | 431.3402 | -30.156   | 0.0032  | 2405 | 431.5829 | -29.62681 | 0.00227   |
| 2406 | 430.9668 | -32.70864 | 0.00316 | 2406 | 431.8473 | -34.16317 | -0.00331  | 2406 | 434.7493 | -35.25687 | -0.00772 | 2406 | 431.5415 | -30.19521 | 0.00314 | 2406 | 431.7435 | -29.58903 | 0.00198   |
| 2407 | 431.1287 | -32.77531 | 0.00316 | 2407 | 432.0115 | -34.23811 | -0.00334  | 2407 | 434.9179 | -35.34654 | -0.00778 | 2407 | 431.687  | -30.22934 | 0.00294 | 2407 | 431.9341 | -29.56552 | 0.00174   |
| 2408 | 431.2739 | -32.84822 | 0.00308 | 2408 | 432.1635 | -34.30742 | -0.00333  | 2408 | 435.0802 | -35.42784 | -0.00779 | 2408 | 431.8538 | -30.27211 | 0.00275 | 2408 | 432.1071 | -29.53784 | 0.0014    |
| 2409 | 431.4656 | -32.9246  | 0.00296 | 2409 | 432.3259 | -34.38318 | -0.00342  | 2409 | 435.2116 | -35.51721 | -0.00794 | 2409 | 432.0133 | -30.31262 | 0.00271 | 2409 | 432.2574 | -29.52501 | 0.00105   |
| 2410 | 431.628  | -33.00234 | 0.00289 | 2410 | 432.4719 | -34.4537  | -0.00357  | 2410 | 435.3416 | -35.60571 | -0.00808 | 2410 | 432.2131 | -30.35818 | 0.00265 | 2410 | 432.4256 | -29.51305 | 7.87E-04  |
| 2411 | 431.8066 | -33.07649 | 0.00293 | 2411 | 432.6747 | -34.52496 | -0.00358  | 2411 | 435.583  | -35.69765 | -0.00812 | 2411 | 432.3615 | -30.39569 | 0.00237 | 2411 | 432.6065 | -29.51294 | 5.81E-04  |
| 2412 | 431.9476 | -33.1554  | 0.00288 | 2412 | 432.8358 | -34.58951 | -0.00355  | 2412 | 435.757  | -35.78252 | -0.00806 | 2412 | 432.5272 | -30.44472 | 0.00214 | 2412 | 432.7871 | -29.5101  | 2.98E-04  |
| 2413 | 432.1294 | -33.23797 | 0.00274 | 2413 | 432.9914 | -34.65857 | -0.00362  | 2413 | 435.8963 | -35.87336 | -0.00814 | 2413 | 432.6906 | -30.48975 | 0.00203 | 2413 | 432.9319 | -29.51947 | -4.72E-05 |
| 2414 | 432.3008 | -33.32143 | 0.00268 | 2414 | 433.1867 | -34.72483 | -0.00379  | 2414 | 436.0685 | -35.96406 | -0.00832 | 2414 | 432.8832 | -30.54224 | 0.00199 | 2414 | 433.1    | -29.52629 | -2.92E-04 |
| 2415 | 432.4767 | -33.40292 | 0.00269 | 2415 | 433.3414 | -34.78841 | -0.00386  | 2415 | 436.2577 | -36.05471 | -0.00844 | 2415 | 433.0461 | -30.58694 | 0.00183 | 2415 | 433.2729 | -29.54749 | -4.77E-04 |
| 2416 | 432.6121 | -33.48441 | 0.00263 | 2416 | 433.5068 | -34.8475  | -0.00381  | 2416 | 436.4251 | -36.14036 | -0.00841 | 2416 | 433.2013 | -30.63976 | 0.00165 | 2416 | 433.4636 | -29.56655 | -7.20E-04 |
| 2417 | 432.7988 | -33.57352 | 0.00249 | 2417 | 433.653  | -34.91    | -0.00382  | 2417 | 436.5705 | -36.22748 | -0.00852 | 2417 | 433.3656 | -30.69233 | 0.00156 | 2417 | 433.6019 | -29.59433 | -0.00102  |
| 2418 | 432.9702 | -33.65768 | 0.00241 | 2418 | 433.8537 | -34.97484 | -0.00399  | 2418 | 436.7247 | -36.31628 | -0.00874 | 2418 | 433.5565 | -30.75    |         |      |          |           |           |

|      |          |           |           |      |          |           |          |      |          |           |          |      |          |           |          |      |          |           |          |
|------|----------|-----------|-----------|------|----------|-----------|----------|------|----------|-----------|----------|------|----------|-----------|----------|------|----------|-----------|----------|
| 2480 | 443.3662 | -39.03893 | -3.69E-04 | 2480 | 444.2854 | -38.50538 | -0.00679 | 2480 | 447.1881 | -40.99916 | -0.0128  | 2480 | 444.0014 | -35.38973 | -0.00175 | 2480 | 444.1649 | -35.38793 | -0.00743 |
| 2481 | 443.5377 | -39.12983 | -3.18E-04 | 2481 | 444.4331 | -38.5594  | -0.00688 | 2481 | 447.3528 | -41.0662  | -0.01295 | 2481 | 444.1576 | -35.46524 | -0.00165 | 2481 | 444.3366 | -35.4927  | -0.00745 |
| 2482 | 443.6821 | -39.21811 | -3.01E-04 | 2482 | 444.6075 | -38.60863 | -0.00686 | 2482 | 447.5241 | -41.13702 | -0.01292 | 2482 | 444.3099 | -35.54653 | -0.00174 | 2482 | 444.52   | -35.58953 | -0.00746 |
| 2483 | 443.871  | -39.31854 | -4.05E-04 | 2483 | 444.7567 | -38.66275 | -0.00676 | 2483 | 447.6709 | -41.20235 | -0.01283 | 2483 | 444.4993 | -35.62986 | -0.00189 | 2483 | 444.6568 | -35.68742 | -0.00756 |
| 2484 | 444.0442 | -39.40905 | -4.86E-04 | 2484 | 444.9642 | -38.71417 | -0.00685 | 2484 | 447.8615 | -41.27747 | -0.01294 | 2484 | 444.6701 | -35.71345 | -0.00186 | 2484 | 444.8344 | -35.78811 | -0.00767 |
| 2485 | 444.2113 | -39.5049  | -4.91E-04 | 2485 | 445.1041 | -38.7663  | -0.00697 | 2485 | 448.0274 | -41.34223 | -0.01312 | 2485 | 444.8294 | -35.79179 | -0.00179 | 2485 | 445.01   | -35.88832 | -0.00769 |
| 2486 | 444.3593 | -39.5936  | -4.58E-04 | 2486 | 445.2809 | -38.81942 | -0.00697 | 2486 | 448.1998 | -41.41247 | -0.01313 | 2486 | 444.9787 | -35.87595 | -0.00185 | 2486 | 445.1881 | -35.98441 | -0.00768 |
| 2487 | 444.5393 | -39.69275 | -5.21E-04 | 2487 | 445.4293 | -38.87589 | -0.00687 | 2487 | 448.3513 | -41.4744  | -0.01307 | 2487 | 445.1711 | -35.96008 | -0.002   | 2487 | 445.3189 | -36.08181 | -0.00774 |
| 2488 | 444.7116 | -39.78144 | -6.03E-04 | 2488 | 445.6405 | -38.9335  | -0.00694 | 2488 | 448.527  | -41.54639 | -0.01322 | 2488 | 445.3352 | -36.04528 | -0.002   | 2488 | 445.5032 | -36.18605 | -0.00787 |
| 2489 | 444.8791 | -39.87238 | -5.70E-04 | 2489 | 445.7806 | -38.98628 | -0.00708 | 2489 | 448.7062 | -41.60947 | -0.01344 | 2489 | 445.5029 | -36.12609 | -0.00196 | 2489 | 445.6744 | -36.2839  | -0.00787 |
| 2490 | 445.0353 | -39.95734 | -5.16E-04 | 2490 | 445.9551 | -39.04389 | -0.00709 | 2490 | 448.8685 | -41.67564 | -0.01344 | 2490 | 445.6505 | -36.21175 | -0.00202 | 2490 | 445.8547 | -36.38444 | -0.00784 |
| 2491 | 445.1981 | -40.05083 | -5.62E-04 | 2491 | 446.1015 | -39.10022 | -0.00701 | 2491 | 449.0209 | -41.73569 | -0.01338 | 2491 | 445.835  | -36.30001 | -0.00219 | 2491 | 445.9933 | -36.4824  | -0.00788 |
| 2492 | 445.3883 | -40.13735 | -6.25E-04 | 2492 | 446.308  | -39.16151 | -0.00702 | 2492 | 449.1937 | -41.80676 | -0.01339 | 2492 | 446.0017 | -36.38834 | -0.00228 | 2492 | 446.1675 | -36.58222 | -0.00799 |
| 2493 | 445.5477 | -40.22535 | -6.10E-04 | 2493 | 446.4608 | -39.21213 | -0.00717 | 2493 | 449.3836 | -41.86816 | -0.01351 | 2493 | 446.1755 | -36.47389 | -0.00226 | 2493 | 446.3422 | -36.68173 | -0.00797 |
| 2494 | 445.7105 | -40.3084  | -5.37E-04 | 2494 | 446.6322 | -39.27234 | -0.00721 | 2494 | 449.5356 | -41.93309 | -0.01348 | 2494 | 446.3119 | -36.56146 | -0.00229 | 2494 | 446.5307 | -36.77869 | -0.00799 |
| 2495 | 445.8694 | -40.40048 | -5.63E-04 | 2495 | 446.7807 | -39.32525 | -0.00713 | 2495 | 449.7007 | -41.99314 | -0.01332 | 2495 | 446.5026 | -36.65409 | -0.00243 | 2495 | 446.671  | -36.87015 | -0.00792 |
| 2496 | 446.0623 | -40.48518 | -6.43E-04 | 2496 | 446.9789 | -39.38544 | -0.00717 | 2496 | 449.8621 | -42.05995 | -0.0133  | 2496 | 446.6678 | -36.7431  | -0.0025  | 2496 | 446.8428 | -36.96649 | -0.00803 |
| 2497 | 446.2196 | -40.5719  | -6.78E-04 | 2497 | 447.1395 | -39.43525 | -0.00731 | 2497 | 450.0547 | -42.12196 | -0.01341 | 2497 | 446.8425 | -36.83376 | -0.00242 | 2497 | 447.0212 | -37.06027 | -0.00806 |
| 2498 | 446.3852 | -40.65493 | -7.13E-04 | 2498 | 447.2987 | -39.49287 | -0.00744 | 2498 | 450.2095 | -42.18651 | -0.01342 | 2498 | 446.9864 | -36.91879 | -0.00237 | 2498 | 447.1953 | -37.15208 | -0.00802 |
| 2499 | 446.5344 | -40.74335 | -7.56E-04 | 2499 | 447.461  | -39.54574 | -0.00738 | 2499 | 450.3792 | -42.25356 | -0.01329 | 2499 | 447.1722 | -37.00813 | -0.00249 | 2499 | 447.3445 | -37.23842 | -0.00805 |
| 2500 | 446.7351 | -40.83134 | -8.97E-04 | 2500 | 447.6498 | -39.6036  | -0.00737 | 2500 | 450.5282 | -42.31305 | -0.0133  | 2500 | 447.3403 | -37.09116 | -0.00258 | 2500 | 447.5122 | -37.33017 | -0.00817 |
| 2501 | 446.8893 | -40.91808 | -9.39E-04 | 2501 | 447.8196 | -39.65146 | -0.00751 | 2501 | 450.7327 | -42.3778  | -0.01344 | 2501 | 447.5111 | -37.17516 | -0.0025  | 2501 | 447.6902 | -37.42073 | -0.00822 |
| 2502 | 447.0518 | -41.00148 | -8.86E-04 | 2502 | 447.9729 | -39.70844 | -0.00758 | 2502 | 450.8834 | -42.44118 | -0.01352 | 2502 | 447.6577 | -37.25243 | -0.00246 | 2502 | 447.8634 | -37.5095  | -0.00818 |
| 2503 | 447.2003 | -41.09103 | -8.54E-04 | 2503 | 448.1323 | -39.75676 | -0.00756 | 2503 | 451.0525 | -42.50542 | -0.0135  | 2503 | 447.8333 | -37.34006 | -0.00255 | 2503 | 448.0221 | -37.58985 | -0.00817 |
| 2504 | 447.4017 | -41.1808  | -9.39E-04 | 2504 | 448.319  | -39.81866 | -0.00748 | 2504 | 451.1998 | -42.57368 | -0.01347 | 2504 | 448.0131 | -37.4184  | -0.00269 | 2504 | 448.1744 | -37.67852 | -0.00827 |
| 2505 | 447.5536 | -41.27022 | -9.99E-04 | 2505 | 448.5027 | -39.86701 | -0.0075  | 2505 | 451.4024 | -42.64027 | -0.01362 | 2505 | 448.1765 | -37.49828 | -0.00267 | 2505 | 448.3602 | -37.76602 | -0.00832 |
| 2506 | 447.7277 | -41.35621 | -9.65E-04 | 2506 | 448.6442 | -39.92215 | -0.00769 | 2506 | 451.5537 | -42.70649 | -0.0138  | 2506 | 448.3284 | -37.57349 | -0.00262 | 2506 | 448.5409 | -37.85403 | -0.00827 |
| 2507 | 447.8716 | -41.44406 | -9.51E-04 | 2507 | 448.814  | -39.97258 | -0.00767 | 2507 | 451.7314 | -42.77282 | -0.01374 | 2507 | 448.4963 | -37.65814 | -0.00271 | 2507 | 448.6981 | -37.93265 | -0.00823 |
| 2508 | 448.0688 | -41.53572 | -0.00105  | 2508 | 448.9841 | -40.03081 | -0.0076  | 2508 | 451.8705 | -42.83976 | -0.01365 | 2508 | 448.6809 | -37.73458 | -0.00288 | 2508 | 448.8523 | -38.01872 | -0.0083  |
| 2509 | 448.2267 | -41.62382 | -0.00115  | 2509 | 449.1726 | -40.08244 | -0.00763 | 2509 | 452.0761 | -42.9116  | -0.01376 | 2509 | 448.8423 | -37.81566 | -0.00289 | 2509 | 449.0351 | -38.10612 | -0.00838 |
| 2510 | 448.3941 | -41.71029 | -0.00114  | 2510 | 449.3185 | -40.13711 | -0.00776 | 2510 | 452.2343 | -42.97872 | -0.01384 | 2510 | 449.0042 | -37.8884  | -0.00281 | 2510 | 449.2026 | -38.19244 | -0.00835 |
| 2511 | 448.5357 | -41.79599 | -0.00111  | 2511 | 449.4926 | -40.18706 | -0.00776 | 2511 | 452.3999 | -43.04745 | -0.01381 | 2511 | 449.1602 | -37.96887 | -0.00288 | 2511 | 449.3745 | -38.27419 | -0.00831 |
| 2512 | 448.7345 | -41.88956 | -0.00115  | 2512 | 449.6514 | -40.24612 | -0.00766 | 2512 | 452.5468 | -43.11199 | -0.01372 | 2512 | 449.3553 | -38.04567 | -0.00297 | 2512 | 449.516  | -38.36122 | -0.00838 |
| 2513 | 448.8954 | -41.97833 | -0.00121  | 2513 | 449.8511 | -40.29797 | -0.00769 | 2513 | 452.7478 | -43.1835  | -0.01376 | 2513 | 449.5122 | -38.12213 | -0.003   | 2513 | 449.7001 | -38.45023 | -0.00848 |
| 2514 | 449.0622 | -42.06391 | -0.0012   | 2514 | 449.9915 | -40.35265 | -0.00781 | 2514 | 452.9061 | -43.24545 | -0.01391 | 2514 | 449.6722 | -38.19444 | -0.00295 | 2514 | 449.8721 | -38.54242 | -0.00849 |
| 2515 | 449.2091 | -42.14477 | -0.00115  | 2515 | 450.1612 | -40.40552 | -0.00785 | 2515 | 453.0725 | -43.31213 | -0.01392 | 2515 | 449.8301 | -38.27368 | -0.00302 | 2515 | 449.8434 | -38.62698 | -0.00843 |
| 2516 | 449.396  | -42.23831 | -0.00119  | 2516 | 450.3241 | -40.46312 | -0.00777 | 2516 | 453.223  | -43.37183 | -0.01382 | 2516 | 450.0299 | -38.3495  | -0.00316 | 2516 | 450.1843 | -38.71766 | -0.00848 |
| 2517 | 449.5632 | -42.32353 | -0.00129  | 2517 | 450.5245 | -40.51714 | -0.00778 | 2517 | 453.4089 | -43.44208 | -0.0139  | 2517 | 450.1806 | -38.42538 | -0.00322 | 2517 | 450.372  | -38.81133 | -0.00856 |
| 2518 | 449.7331 | -42.41319 | -0.00128  | 2518 | 450.6621 | -40.57021 | -0.00796 | 2518 | 453.5834 | -43.50343 | -0.01405 | 2518 | 450.3474 | -38.49783 | -0.00315 | 2518 | 450.5417 | -38.90225 | -0.00861 |
| 2519 | 449.8817 | -42.49209 | -0.00125  | 2519 | 450.8392 | -40.62616 | -0.00802 | 2519 | 453.7429 | -43.56943 | -0.01413 | 2519 | 450.4912 | -38.57297 | -0.00315 | 2519 | 450.7169 | -38.99132 | -0.00855 |
| 2520 | 450.0562 | -42.58517 | -0.00129  | 2520 | 450.9938 | -40.68314 | -0.00797 | 2520 | 453.8952 | -43.62999 | -0.01407 | 2520 | 450.6945 | -38.64996 | -0.0033  | 2520 | 450.8683 | -39.07864 | -0.00858 |
| 2521 | 450.2379 | -42.67087 | -0.00141  | 2521 | 451.1947 | -40.74229 | -0.00801 | 2521 | 454.0761 | -43.70236 | -0.01408 | 2521 | 450.8491 | -38.72481 | -0.00336 | 2521 | 451.0303 | -39.17247 | -0.00871 |
| 2522 | 450.3964 | -42.75954 | -0.00145  | 2522 | 451.3387 | -40.79752 | -0.00816 | 2522 | 454.2572 | -43.76556 | -0.01425 | 2522 | 451.0229 | -38.79732 | -0.00331 | 2522 | 451.2126 | -39.25899 | -0.00873 |
| 2523 | 450.5513 | -42.84126 | -0.0014   | 2523 | 451.5113 | -40.8553  | -0.00822 | 2523 | 454.4146 | -43.83299 | -0.01427 | 2523 | 451.1624 | -38.87163 | -0.00329 | 2523 | 451.3877 | -39.34815 | -0.00868 |
| 2524 | 450.7177 | -42.93367 | -0.00146  | 2524 | 451.6628 | -40.91207 | -0.00814 | 2524 | 454.5788 | -43.89343 | -0.01414 | 2524 | 451.3687 | -38.9491  | -0.00344 | 2524 | 451.5264 | -39.43216 | -0.00868 |
| 2525 | 450.8994 | -43.0196  | -0.00156  | 2525 | 451.8668 | -40.97396 | -0.0081  | 2525 | 454.7471 | -43.96407 | -0.01401 | 2525 | 451.5196 | -39.02188 | -0.00355 | 2525 | 451.7042 | -39.52543 | -0.00881 |
| 2526 | 451.0544 | -43.11007 | -0.00161  | 2526 | 452.0138 | -41.02576 | -0.00819 | 2526 | 454.9326 | -44.0268  | -0.01399 | 2526 | 451.6926 | -39.09415 | -0.0035  | 2526 | 451.884  | -39.61405 | -0.00885 |
| 2527 | 451.2185 | -43.19437 | -0.00155  | 2527 | 452.1808 | -41.08566 | -0.00831 | 2527 | 455.087  | -44.09481 | -0.014   | 2527 | 451.8382 | -39.16576 | -0.00346 | 2527 | 452.0508 | -39.7045  | -0.00882 |
| 2528 | 451.3746 | -43.28016 | -0.00154  | 2528 | 452.34   | -41.14132 | -0.00823 | 2528 | 455.2541 | -44.15355 | -0.01377 | 2528 | 452.0354 | -39.24405 | -0.00355 | 2528 | 452.1993 | -39.7911  | -0.00882 |
| 2529 | 451.5725 | -43.3754  | -0.00162  | 2529 | 452.5329 | -41.20032 | -0.00816 | 2529 | 455.4136 | -44.22302 | -0.01364 | 2529 | 452.1973 | -39.31346 | -0.00369 | 2529 | 452.3697 | -39.88789 | -0.00895 |
| 2530 | 451.7282 | -43.46617 | -0.00165  | 2530 | 452.6898 | -41.25125 | -0.00828 | 2530 | 455.6152 | -44.2818  | -0.01372 | 2530 | 452.3651 | -39.38583 | -0.00364 | 2530 | 452.5518 | -39.98132 | -0.00901 |
| 2531 | 451.8911 | -43.55029 | -0.00159  | 2531 | 452.853  | -41.30934 | -0.0084  | 2531 | 455.762  | -44.34611 | -0.01373 | 2531 | 4        |           |          |      |          |           |          |

|      |          |           |          |      |          |           |          |      |          |           |          |      |          |           |          |      |          |           |          |
|------|----------|-----------|----------|------|----------|-----------|----------|------|----------|-----------|----------|------|----------|-----------|----------|------|----------|-----------|----------|
| 2593 | 462.2727 | -48.22711 | -0.00288 | 2593 | 463.2888 | -44.36927 | -0.01037 | 2593 | 466.185  | -48.03562 | -0.01393 | 2593 | 462.9216 | -43.70988 | -0.00433 | 2593 | 463.132  | -45.19701 | -0.0099  |
| 2594 | 462.4318 | -48.30174 | -0.00283 | 2594 | 463.4607 | -44.41708 | -0.01038 | 2594 | 466.3591 | -48.09384 | -0.01391 | 2594 | 463.1144 | -43.78116 | -0.00425 | 2594 | 463.2834 | -45.27452 | -0.00982 |
| 2595 | 462.6324 | -48.36948 | -0.00289 | 2595 | 463.6484 | -44.46774 | -0.01033 | 2595 | 466.5166 | -48.16053 | -0.01375 | 2595 | 463.2641 | -43.84492 | -0.00437 | 2595 | 463.4584 | -45.3644  | -0.00983 |
| 2596 | 462.7793 | -48.44165 | -0.00297 | 2596 | 463.8066 | -44.51153 | -0.01031 | 2596 | 466.7231 | -48.21923 | -0.01369 | 2596 | 463.4353 | -43.9156  | -0.00446 | 2596 | 463.6398 | -45.44454 | -0.00991 |
| 2597 | 462.9497 | -48.50722 | -0.00298 | 2597 | 463.9664 | -44.5643  | -0.0104  | 2597 | 466.8642 | -48.27696 | -0.01383 | 2597 | 463.5893 | -43.98062 | -0.00438 | 2597 | 463.7977 | -45.52897 | -0.00996 |
| 2598 | 463.0984 | -48.57801 | -0.00293 | 2598 | 464.1403 | -44.61078 | -0.0105  | 2598 | 467.0364 | -48.33461 | -0.01384 | 2598 | 463.7844 | -44.05061 | -0.00429 | 2598 | 463.9609 | -45.60706 | -0.00988 |
| 2599 | 463.3054 | -48.64369 | -0.00295 | 2599 | 464.3192 | -44.66052 | -0.01042 | 2599 | 467.1921 | -48.39334 | -0.01375 | 2599 | 463.9423 | -44.11167 | -0.0044  | 2599 | 464.1191 | -45.69602 | -0.00987 |
| 2600 | 463.4456 | -48.70863 | -0.00303 | 2600 | 464.492  | -44.70349 | -0.0104  | 2600 | 467.3978 | -48.45238 | -0.01373 | 2600 | 464.0955 | -44.18078 | -0.00452 | 2600 | 464.3161 | -45.7756  | -0.00999 |
| 2601 | 463.6211 | -48.77384 | -0.003   | 2601 | 464.6399 | -44.75197 | -0.01058 | 2601 | 467.5369 | -48.50388 | -0.01387 | 2601 | 464.2654 | -44.24675 | -0.00449 | 2601 | 464.469  | -45.85981 | -0.01001 |
| 2602 | 463.7709 | -48.83985 | -0.00297 | 2602 | 464.8171 | -44.79771 | -0.0107  | 2602 | 467.7166 | -48.56241 | -0.01395 | 2602 | 464.4558 | -44.31644 | -0.00442 | 2602 | 464.6307 | -45.93997 | -0.01006 |
| 2603 | 463.9756 | -48.90723 | -0.00297 | 2603 | 464.9997 | -44.84409 | -0.01068 | 2603 | 467.8704 | -48.61263 | -0.01386 | 2603 | 464.613  | -44.37885 | -0.00448 | 2603 | 464.7916 | -46.02821 | -0.00999 |
| 2604 | 464.1226 | -48.97103 | -0.00303 | 2604 | 465.1677 | -44.88144 | -0.01063 | 2604 | 468.0661 | -48.67263 | -0.01383 | 2604 | 464.765  | -44.45057 | -0.00446 | 2604 | 464.9989 | -46.10846 | -0.01009 |
| 2605 | 464.2951 | -49.04309 | -0.00302 | 2605 | 465.3126 | -44.924   | -0.01078 | 2605 | 468.2189 | -48.72224 | -0.01398 | 2605 | 464.9327 | -44.51929 | -0.00463 | 2605 | 465.1404 | -46.18992 | -0.01016 |
| 2606 | 464.4378 | -49.11237 | -0.00295 | 2606 | 465.4931 | -44.96433 | -0.0109  | 2606 | 468.3862 | -48.77663 | -0.01405 | 2606 | 465.1147 | -44.59212 | -0.00453 | 2606 | 465.3132 | -46.27064 | -0.01013 |
| 2607 | 464.6455 | -49.1899  | -0.00299 | 2607 | 465.6664 | -45.00747 | -0.01082 | 2607 | 468.5416 | -48.83017 | -0.01396 | 2607 | 465.2895 | -44.65661 | -0.00454 | 2607 | 465.4626 | -46.35291 | -0.01007 |
| 2608 | 464.7987 | -49.25838 | -0.00307 | 2608 | 465.8483 | -45.04185 | -0.01074 | 2608 | 468.7443 | -48.88686 | -0.01384 | 2608 | 465.4355 | -44.7276  | -0.00468 | 2608 | 465.6636 | -46.43393 | -0.01014 |
| 2609 | 464.9583 | -49.33595 | -0.00312 | 2609 | 465.9882 | -45.0793  | -0.01081 | 2609 | 468.8993 | -48.93361 | -0.01398 | 2609 | 465.6039 | -44.79754 | -0.00472 | 2609 | 465.8125 | -46.51233 | -0.01022 |
| 2610 | 465.109  | -49.40816 | -0.0031  | 2610 | 466.1664 | -45.12112 | -0.0109  | 2610 | 468.9592 | -48.99038 | -0.01409 | 2610 | 465.7847 | -44.87053 | -0.00462 | 2610 | 465.986  | -46.59137 | -0.01019 |
| 2611 | 465.3065 | -49.49107 | -0.00313 | 2611 | 466.3435 | -45.16242 | -0.01088 | 2611 | 469.223  | -49.04443 | -0.014   | 2611 | 465.9628 | -44.93504 | -0.0046  | 2611 | 466.1268 | -46.67353 | -0.01013 |
| 2612 | 465.4652 | -49.5641  | -0.00321 | 2612 | 466.5269 | -45.20358 | -0.01072 | 2612 | 469.4087 | -49.1016  | -0.01391 | 2612 | 466.1033 | -45.00705 | -0.00471 | 2612 | 466.3356 | -46.75611 | -0.01018 |
| 2613 | 465.6272 | -49.6465  | -0.00327 | 2613 | 466.664  | -45.24196 | -0.01078 | 2613 | 469.576  | -49.1526  | -0.01402 | 2613 | 466.2826 | -45.07709 | -0.00477 | 2613 | 466.4849 | -46.8348  | -0.01026 |
| 2614 | 465.7833 | -49.72251 | -0.00322 | 2614 | 466.8449 | -45.2882  | -0.01087 | 2614 | 469.7344 | -49.20824 | -0.0142  | 2614 | 466.4522 | -45.15051 | -0.0047  | 2614 | 466.6557 | -46.91828 | -0.01025 |
| 2615 | 465.9663 | -49.80861 | -0.00317 | 2615 | 467.0198 | -45.33187 | -0.01088 | 2615 | 469.8923 | -49.26101 | -0.01417 | 2615 | 466.6373 | -45.21597 | -0.00463 | 2615 | 466.8018 | -46.99801 | -0.01019 |
| 2616 | 466.144  | -49.88583 | -0.00323 | 2616 | 467.1988 | -45.37712 | -0.01078 | 2616 | 470.0739 | -49.32502 | -0.01401 | 2616 | 466.7792 | -45.28467 | -0.00474 | 2616 | 467.01   | -47.08624 | -0.01024 |
| 2617 | 466.2944 | -49.96862 | -0.00327 | 2617 | 467.3431 | -45.41646 | -0.01081 | 2617 | 470.2596 | -49.37696 | -0.01406 | 2617 | 466.951  | -45.35156 | -0.00483 | 2617 | 467.159  | -47.16495 | -0.0103  |
| 2618 | 466.454  | -50.04483 | -0.00322 | 2618 | 467.5137 | -45.46274 | -0.01096 | 2618 | 470.3982 | -49.43661 | -0.0142  | 2618 | 467.1209 | -45.42208 | -0.00476 | 2618 | 467.3319 | -47.25212 | -0.01031 |
| 2619 | 466.6328 | -50.13221 | -0.00317 | 2619 | 467.6906 | -45.50934 | -0.0111  | 2619 | 470.5714 | -49.49448 | -0.01414 | 2619 | 467.312  | -45.48897 | -0.00466 | 2619 | 467.4771 | -47.3316  | -0.01025 |
| 2620 | 466.8124 | -50.20493 | -0.00323 | 2620 | 467.8753 | -45.55825 | -0.01092 | 2620 | 470.7467 | -49.55788 | -0.01402 | 2620 | 467.4462 | -45.55386 | -0.00472 | 2620 | 467.6745 | -47.42254 | -0.01026 |
| 2621 | 466.9589 | -50.28285 | -0.00329 | 2621 | 468.022  | -45.59837 | -0.01093 | 2621 | 470.9355 | -49.61375 | -0.01396 | 2621 | 467.6254 | -45.62251 | -0.00483 | 2621 | 467.8406 | -47.50294 | -0.01035 |
| 2622 | 467.1256 | -50.35765 | -0.00328 | 2622 | 468.1853 | -45.64674 | -0.01108 | 2622 | 471.0775 | -49.67288 | -0.0141  | 2622 | 467.7939 | -45.69094 | -0.00479 | 2622 | 467.9993 | -47.58604 | -0.01035 |
| 2623 | 467.2906 | -50.43773 | -0.00321 | 2623 | 468.3665 | -45.69605 | -0.01117 | 2623 | 471.257  | -49.72612 | -0.01411 | 2623 | 467.9789 | -45.76037 | -0.00469 | 2623 | 468.1491 | -47.66399 | -0.0103  |
| 2624 | 467.4785 | -50.51291 | -0.00329 | 2624 | 468.5425 | -45.74691 | -0.0111  | 2624 | 471.4158 | -49.78701 | -0.01398 | 2624 | 468.1249 | -45.82377 | -0.00475 | 2624 | 468.3415 | -47.73534 | -0.01028 |
| 2625 | 467.6302 | -50.59134 | -0.00337 | 2625 | 468.699  | -45.79257 | -0.01104 | 2625 | 471.6144 | -49.83884 | -0.01396 | 2625 | 468.2952 | -45.89316 | -0.00489 | 2625 | 468.5125 | -47.83238 | -0.01039 |
| 2626 | 467.7958 | -50.66633 | -0.00336 | 2626 | 468.8613 | -45.84551 | -0.01119 | 2626 | 471.7524 | -49.89057 | -0.01407 | 2626 | 468.4598 | -45.96102 | -0.0049  | 2626 | 468.6687 | -47.91672 | -0.01045 |
| 2627 | 467.9587 | -50.75    | -0.00331 | 2627 | 469.0385 | -45.89835 | -0.01129 | 2627 | 471.9269 | -49.94466 | -0.01415 | 2627 | 468.6475 | -46.03011 | -0.00483 | 2627 | 468.8315 | -47.99627 | -0.01041 |
| 2628 | 468.1603 | -50.82553 | -0.00337 | 2628 | 469.2151 | -45.9531  | -0.01121 | 2628 | 472.0862 | -49.99406 | -0.01406 | 2628 | 468.7985 | -46.09411 | -0.00486 | 2628 | 469.0054 | -48.08526 | -0.01044 |
| 2629 | 468.2979 | -50.90286 | -0.00345 | 2629 | 469.3779 | -45.99985 | -0.01116 | 2629 | 472.2853 | -50.05563 | -0.01407 | 2629 | 468.9599 | -46.16416 | -0.00495 | 2629 | 469.191  | -48.16752 | -0.01049 |
| 2630 | 468.4736 | -50.97797 | -0.00346 | 2630 | 469.5258 | -46.05072 | -0.01131 | 2630 | 472.4231 | -50.10964 | -0.01424 | 2630 | 469.1364 | -46.23252 | -0.00493 | 2630 | 469.3412 | -48.25243 | -0.01058 |
| 2631 | 468.6259 | -51.05474 | -0.00342 | 2631 | 469.7148 | -46.10263 | -0.01146 | 2631 | 472.6007 | -50.16976 | -0.01432 | 2631 | 469.3197 | -46.30243 | -0.00483 | 2631 | 469.5054 | -48.33228 | -0.01054 |
| 2632 | 468.8248 | -51.12705 | -0.00347 | 2632 | 469.8911 | -46.15425 | -0.01144 | 2632 | 472.7574 | -50.22866 | -0.01427 | 2632 | 469.4755 | -46.3669  | -0.00481 | 2632 | 469.6732 | -48.42197 | -0.01049 |
| 2633 | 468.9671 | -51.19731 | -0.00355 | 2633 | 470.0531 | -46.19712 | -0.01136 | 2633 | 472.9589 | -50.29108 | -0.01424 | 2633 | 469.6341 | -46.43776 | -0.00495 | 2633 | 469.8652 | -48.5036  | -0.01055 |
| 2634 | 469.1444 | -51.27311 | -0.00357 | 2634 | 470.2023 | -46.24552 | -0.01143 | 2634 | 473.1048 | -50.34457 | -0.01432 | 2634 | 469.807  | -46.50752 | -0.00499 | 2634 | 470.0057 | -48.5901  | -0.01062 |
| 2635 | 469.288  | -51.34276 | -0.00352 | 2635 | 470.39   | -46.29368 | -0.01152 | 2635 | 473.2753 | -50.40406 | -0.01443 | 2635 | 469.9893 | -46.57964 | -0.00491 | 2635 | 470.1776 | -48.67282 | -0.0106  |
| 2636 | 469.4959 | -51.42359 | -0.00353 | 2636 | 470.5562 | -46.3415  | -0.01144 | 2636 | 473.4302 | -50.46303 | -0.01444 | 2636 | 470.1504 | -46.64551 | -0.00489 | 2636 | 470.3378 | -48.76156 | -0.01051 |
| 2637 | 469.6364 | -51.49305 | -0.00361 | 2637 | 470.7376 | -46.38495 | -0.01133 | 2637 | 473.6262 | -50.52446 | -0.01435 | 2637 | 470.3018 | -46.71959 | -0.00506 | 2637 | 470.5329 | -48.84483 | -0.01053 |
| 2638 | 469.8057 | -51.57253 | -0.00363 | 2638 | 470.8822 | -46.43082 | -0.01137 | 2638 | 473.7805 | -50.57747 | -0.01442 | 2638 | 470.4805 | -46.79368 | -0.00515 | 2638 | 470.6793 | -48.93093 | -0.0106  |
| 2639 | 469.9605 | -51.64842 | -0.00358 | 2639 | 471.0599 | -46.47813 | -0.01149 | 2639 | 473.9427 | -50.63776 | -0.01457 | 2639 | 470.6594 | -46.86745 | -0.00508 | 2639 | 470.8554 | -49.01527 | -0.0106  |
| 2640 | 470.161  | -51.72095 | -0.00359 | 2640 | 471.2326 | -46.52593 | -0.01153 | 2640 | 474.1083 | -50.69496 | -0.01455 | 2640 | 470.8259 | -46.93593 | -0.00497 | 2640 | 471.0065 | -49.10528 | -0.01053 |
| 2641 | 470.3138 | -51.80462 | -0.00367 | 2641 | 471.4105 | -46.56901 | -0.01145 | 2641 | 474.2953 | -50.75507 | -0.01442 | 2641 | 470.9755 | -47.00936 | -0.00504 | 2641 | 471.2138 | -49.18988 | -0.01056 |
| 2642 | 470.4733 | -51.88527 | -0.00369 | 2642 | 471.5473 | -46.61542 | -0.01149 | 2642 | 474.4583 | -50.80759 | -0.01443 | 2642 | 471.1536 | -47.08083 | -0.00507 | 2642 | 471.3541 | -49.27445 | -0.01064 |
| 2643 | 470.6254 | -51.96889 | -0.00363 | 2643 | 471.7313 | -46.66816 | -0.01166 | 2643 | 474.6135 | -50.86715 | -0.01454 | 2643 | 471.3258 | -47.15318 | -0.00497 | 2643 | 471.5286 | -49.36023 | -0.01067 |
| 2644 | 470.8201 | -52.04578 | -0.00361 | 2644 | 471.9047 | -46.71529 | -0.0117  | 2644 | 474.7819 | -50.92193 | -0.01455 | 2644 | 471.5016 | -47.21791 | -0.00    |      |          |           |          |

|      |          |           |          |      |          |           |          |      |          |           |          |      |          |           |          |      |          |           |          |
|------|----------|-----------|----------|------|----------|-----------|----------|------|----------|-----------|----------|------|----------|-----------|----------|------|----------|-----------|----------|
| 2706 | 481.1982 | -56.70275 | -0.00476 | 2706 | 482.1116 | -51.06467 | -0.01355 | 2706 | 485.2291 | -54.6853  | -0.01582 | 2706 | 481.9064 | -51.66495 | -0.0059  | 2706 | 482.063  | -54.91803 | -0.01159 |
| 2707 | 481.3563 | -56.77818 | -0.00482 | 2707 | 482.2726 | -51.21065 | -0.01353 | 2707 | 485.407  | -54.75407 | -0.01572 | 2707 | 482.0497 | -51.74018 | -0.00588 | 2707 | 482.2557 | -55.00129 | -0.01153 |
| 2708 | 481.5134 | -56.86282 | -0.00488 | 2708 | 482.4092 | -51.34879 | -0.01348 | 2708 | 485.5712 | -54.81713 | -0.0157  | 2708 | 482.2539 | -51.81694 | -0.00602 | 2708 | 482.3352 | -55.08086 | -0.0116  |
| 2709 | 481.6771 | -56.94206 | -0.00487 | 2709 | 482.5845 | -51.49408 | -0.01355 | 2709 | 485.7173 | -54.88993 | -0.01584 | 2709 | 482.4045 | -51.88994 | -0.00611 | 2709 | 482.5677 | -55.16403 | -0.01166 |
| 2710 | 481.8587 | -57.02761 | -0.00483 | 2710 | 482.7537 | -51.62366 | -0.01369 | 2710 | 485.8962 | -54.95489 | -0.01599 | 2710 | 482.5776 | -51.96537 | -0.00607 | 2710 | 482.7283 | -55.24855 | -0.01163 |
| 2711 | 482.0265 | -57.10438 | -0.00486 | 2711 | 482.9075 | -51.75275 | -0.0137  | 2711 | 486.0684 | -55.02578 | -0.016   | 2711 | 482.7231 | -52.03677 | -0.00599 | 2711 | 482.9237 | -55.33332 | -0.01153 |
| 2712 | 482.1795 | -57.18888 | -0.00492 | 2712 | 483.0547 | -51.86966 | -0.01365 | 2712 | 486.2495 | -55.09126 | -0.01594 | 2712 | 482.9186 | -52.11762 | -0.00605 | 2712 | 483.067  | -55.41358 | -0.01158 |
| 2713 | 482.3461 | -57.26282 | -0.00491 | 2713 | 483.2177 | -51.99184 | -0.01375 | 2713 | 486.3893 | -55.15972 | -0.01608 | 2713 | 483.0785 | -52.19134 | -0.00614 | 2713 | 483.238  | -55.50062 | -0.01165 |
| 2714 | 482.5282 | -57.33437 | -0.00482 | 2714 | 483.3934 | -52.10024 | -0.01387 | 2714 | 486.5637 | -55.23116 | -0.01623 | 2714 | 483.2506 | -52.26808 | -0.00607 | 2714 | 483.4031 | -55.58486 | -0.01161 |
| 2715 | 482.7069 | -57.4308  | -0.00486 | 2715 | 483.5466 | -52.20496 | -0.01387 | 2715 | 486.7358 | -55.30162 | -0.01624 | 2715 | 483.3906 | -52.34097 | -0.00599 | 2715 | 483.5906 | -55.67217 | -0.01154 |
| 2716 | 482.8453 | -57.51321 | -0.00498 | 2716 | 483.6974 | -52.29713 | -0.01379 | 2716 | 486.9193 | -55.36846 | -0.01611 | 2716 | 483.5915 | -52.42362 | -0.00603 | 2716 | 483.7435 | -55.75066 | -0.01156 |
| 2717 | 483.0191 | -57.59005 | -0.00502 | 2717 | 483.8509 | -52.39383 | -0.0138  | 2717 | 487.0601 | -55.43556 | -0.01612 | 2717 | 483.7575 | -52.49669 | -0.00617 | 2717 | 483.9054 | -55.83628 | -0.01165 |
| 2718 | 483.1909 | -57.67312 | -0.00497 | 2718 | 484.0387 | -52.47584 | -0.01392 | 2718 | 487.2379 | -55.5063  | -0.01627 | 2718 | 483.9194 | -52.5734  | -0.00615 | 2718 | 484.0664 | -55.91867 | -0.01165 |
| 2719 | 483.3781 | -57.74671 | -0.005   | 2719 | 484.1895 | -52.55505 | -0.01399 | 2719 | 487.4091 | -55.57204 | -0.01621 | 2719 | 484.0712 | -52.64632 | -0.00608 | 2719 | 484.2567 | -56.00282 | -0.01156 |
| 2720 | 483.5163 | -57.82375 | -0.00512 | 2720 | 484.3465 | -52.62352 | -0.01397 | 2720 | 487.5889 | -55.63974 | -0.01605 | 2720 | 484.2545 | -52.7266  | -0.00611 | 2720 | 484.4137 | -56.08045 | -0.01156 |
| 2721 | 483.6933 | -57.8943  | -0.00518 | 2721 | 484.4981 | -52.69669 | -0.01398 | 2721 | 487.7325 | -55.70136 | -0.01602 | 2721 | 484.4293 | -52.80096 | -0.00623 | 2721 | 484.5664 | -56.16498 | -0.01163 |
| 2722 | 483.8536 | -57.97468 | -0.00513 | 2722 | 484.6493 | -52.75798 | -0.01412 | 2722 | 487.9008 | -55.77167 | -0.01617 | 2722 | 484.5916 | -52.87732 | -0.00624 | 2722 | 484.7399 | -56.2465  | -0.01165 |
| 2723 | 484.0497 | -58.04572 | -0.00511 | 2723 | 484.8376 | -52.81744 | -0.01419 | 2723 | 488.0747 | -55.8391  | -0.01628 | 2723 | 484.7463 | -52.9457  | -0.00613 | 2723 | 484.9244 | -56.32024 | -0.0116  |
| 2724 | 484.1888 | -58.11601 | -0.00521 | 2724 | 484.9991 | -52.86944 | -0.01411 | 2724 | 488.2606 | -55.90716 | -0.01619 | 2724 | 484.9201 | -53.02461 | -0.00609 | 2724 | 485.091  | -56.40644 | -0.01156 |
| 2725 | 484.3673 | -58.18897 | -0.00526 | 2725 | 485.1418 | -52.92468 | -0.01409 | 2725 | 488.4018 | -55.96822 | -0.01616 | 2725 | 485.1051 | -53.09441 | -0.00618 | 2725 | 485.2404 | -56.48786 | -0.01165 |
| 2726 | 484.527  | -58.26237 | -0.00524 | 2726 | 485.3421 | -52.97532 | -0.01418 | 2726 | 488.566  | -56.03731 | -0.01634 | 2726 | 485.2562 | -53.16733 | -0.00621 | 2726 | 485.4153 | -56.56948 | -0.01172 |
| 2727 | 484.7227 | -58.3358  | -0.00521 | 2727 | 485.4933 | -53.0235  | -0.01427 | 2727 | 488.7452 | -56.10432 | -0.01645 | 2727 | 485.4192 | -53.23583 | -0.00614 | 2727 | 485.5929 | -56.65149 | -0.01166 |
| 2728 | 484.8604 | -58.4045  | -0.00527 | 2728 | 485.6538 | -53.06523 | -0.01425 | 2728 | 488.9247 | -56.17368 | -0.01636 | 2728 | 485.5897 | -53.31315 | -0.00612 | 2728 | 485.766  | -56.72954 | -0.01161 |
| 2729 | 485.0363 | -58.48004 | -0.00534 | 2729 | 485.7925 | -53.11027 | -0.0142  | 2729 | 489.081  | -56.23474 | -0.0163  | 2729 | 485.7789 | -53.38293 | -0.00621 | 2729 | 485.9096 | -56.80963 | -0.01171 |
| 2730 | 485.1926 | -58.55084 | -0.00528 | 2730 | 485.9973 | -53.15569 | -0.01432 | 2730 | 489.2389 | -56.30266 | -0.01642 | 2730 | 485.9271 | -53.45677 | -0.00627 | 2730 | 486.0823 | -56.8928  | -0.01176 |
| 2731 | 485.3894 | -58.62895 | -0.00523 | 2731 | 486.1438 | -53.19575 | -0.01439 | 2731 | 489.4118 | -56.36856 | -0.01649 | 2731 | 486.0976 | -53.52589 | -0.00619 | 2731 | 486.2597 | -56.97919 | -0.01174 |
| 2732 | 485.5364 | -58.69799 | -0.00528 | 2732 | 486.3136 | -53.23606 | -0.01437 | 2732 | 489.5896 | -56.43858 | -0.0164  | 2732 | 486.2492 | -53.6024  | -0.00618 | 2732 | 486.4337 | -57.05689 | -0.01169 |
| 2733 | 485.7029 | -58.77629 | -0.00534 | 2733 | 486.4566 | -53.2711  | -0.01429 | 2733 | 489.7514 | -56.50112 | -0.01634 | 2733 | 486.4518 | -53.67267 | -0.00626 | 2733 | 486.5721 | -57.14155 | -0.01179 |
| 2734 | 485.8652 | -58.85152 | -0.00534 | 2734 | 486.6526 | -53.31195 | -0.01441 | 2734 | 489.8992 | -56.56925 | -0.01649 | 2734 | 486.599  | -53.74574 | -0.00635 | 2734 | 486.7513 | -57.22644 | -0.01186 |
| 2735 | 486.0572 | -58.92961 | -0.00529 | 2735 | 486.8114 | -53.34369 | -0.0145  | 2735 | 490.0798 | -56.63705 | -0.0166  | 2735 | 486.7684 | -53.81454 | -0.00633 | 2735 | 486.919  | -57.31287 | -0.01184 |
| 2736 | 486.2105 | -59.00098 | -0.00535 | 2736 | 486.974  | -53.376   | -0.01445 | 2736 | 490.2544 | -56.70442 | -0.01657 | 2736 | 486.9194 | -53.89063 | -0.00629 | 2736 | 487.1061 | -57.39489 | -0.01181 |
| 2737 | 486.3728 | -59.07884 | -0.00546 | 2737 | 487.1166 | -53.40153 | -0.01438 | 2737 | 490.4224 | -56.76835 | -0.01655 | 2737 | 487.125  | -53.96109 | -0.00638 | 2737 | 487.2467 | -57.47374 | -0.01185 |
| 2738 | 486.5376 | -59.15271 | -0.00546 | 2738 | 487.3068 | -53.43742 | -0.01444 | 2738 | 490.5683 | -56.83506 | -0.01669 | 2738 | 487.2648 | -54.03183 | -0.00649 | 2738 | 487.4213 | -57.55709 | -0.01194 |
| 2739 | 486.7236 | -59.23103 | -0.00541 | 2739 | 487.47   | -53.4623  | -0.01456 | 2739 | 490.7495 | -56.90265 | -0.01681 | 2739 | 487.4414 | -54.10423 | -0.00644 | 2739 | 487.5924 | -57.63918 | -0.01191 |
| 2740 | 486.8892 | -59.30167 | -0.00545 | 2740 | 487.6279 | -53.49225 | -0.01457 | 2740 | 490.9163 | -56.9717  | -0.01678 | 2740 | 487.5888 | -54.17934 | -0.00637 | 2740 | 487.7802 | -57.72002 | -0.01183 |
| 2741 | 487.0391 | -59.37956 | -0.00555 | 2741 | 487.7806 | -53.51534 | -0.01449 | 2741 | 491.0948 | -57.0348  | -0.01672 | 2741 | 487.7955 | -54.25556 | -0.00635 | 2741 | 487.915  | -57.79567 | -0.01188 |
| 2742 | 487.2088 | -59.45505 | -0.00562 | 2742 | 487.9558 | -53.54918 | -0.01453 | 2742 | 491.237  | -57.10347 | -0.01683 | 2742 | 487.9415 | -54.3276  | -0.00646 | 2742 | 488.0875 | -57.87951 | -0.01198 |
| 2743 | 487.3918 | -59.53407 | -0.00554 | 2743 | 488.1314 | -53.57612 | -0.01468 | 2743 | 491.4159 | -57.17445 | -0.01701 | 2743 | 488.1125 | -54.40183 | -0.00645 | 2743 | 488.2607 | -57.96394 | -0.01199 |
| 2744 | 487.5609 | -59.60996 | -0.00559 | 2744 | 488.2916 | -53.60747 | -0.01474 | 2744 | 491.5902 | -57.24552 | -0.01709 | 2744 | 488.2563 | -54.47392 | -0.00637 | 2744 | 488.4396 | -58.05037 | -0.01193 |
| 2745 | 487.7052 | -59.6831  | -0.00571 | 2745 | 488.4487 | -53.62904 | -0.01469 | 2745 | 491.7657 | -57.31219 | -0.01703 | 2745 | 488.4652 | -54.55291 | -0.00638 | 2745 | 488.5892 | -58.13119 | -0.01194 |
| 2746 | 487.8757 | -59.7575  | -0.00575 | 2746 | 488.6184 | -53.66206 | -0.01467 | 2746 | 491.9032 | -57.37866 | -0.01714 | 2746 | 488.6129 | -54.61951 | -0.00655 | 2746 | 488.7536 | -58.21795 | -0.01202 |
| 2747 | 488.0494 | -59.83741 | -0.00574 | 2747 | 488.803  | -53.68656 | -0.01479 | 2747 | 492.083  | -57.4526  | -0.01736 | 2747 | 488.7786 | -54.69508 | -0.00664 | 2747 | 488.9249 | -58.30516 | -0.01205 |
| 2748 | 488.2311 | -59.91014 | -0.00572 | 2748 | 488.9557 | -53.71198 | -0.01486 | 2748 | 492.2551 | -57.52028 | -0.01747 | 2748 | 488.9315 | -54.76599 | -0.00659 | 2748 | 489.1075 | -58.39462 | -0.012   |
| 2749 | 488.3765 | -59.98996 | -0.00579 | 2749 | 489.1205 | -53.73401 | -0.01481 | 2749 | 492.4318 | -57.58917 | -0.01745 | 2749 | 489.1238 | -54.84489 | -0.00657 | 2749 | 489.2619 | -58.47547 | -0.01198 |
| 2750 | 488.5468 | -60.06485 | -0.00583 | 2750 | 489.2828 | -53.76178 | -0.01476 | 2750 | 492.5768 | -57.655   | -0.01745 | 2750 | 489.2887 | -54.91624 | -0.00672 | 2750 | 489.4208 | -58.56299 | -0.01211 |
| 2751 | 488.7154 | -60.1497  | -0.00576 | 2751 | 489.4724 | -53.78152 | -0.01485 | 2751 | 492.7471 | -57.72835 | -0.01763 | 2751 | 489.448  | -54.99453 | -0.00675 | 2751 | 489.6021 | -58.64929 | -0.01217 |
| 2752 | 488.9063 | -60.22603 | -0.00573 | 2752 | 489.6199 | -53.80477 | -0.01494 | 2752 | 492.9248 | -57.79923 | -0.01771 | 2752 | 489.6026 | -55.06589 | -0.00668 | 2752 | 489.778  | -58.73587 | -0.01214 |
| 2753 | 489.037  | -60.30665 | -0.00575 | 2753 | 489.7919 | -53.8236  | -0.01489 | 2753 | 493.1027 | -57.86825 | -0.01765 | 2753 | 489.7909 | -55.14587 | -0.0066  | 2753 | 489.9368 | -58.8154  | -0.01219 |
| 2754 | 489.2152 | -60.38854 | -0.00579 | 2754 | 489.9409 | -53.84742 | -0.01485 | 2754 | 493.247  | -57.93332 | -0.01763 | 2754 | 489.9657 | -55.21532 | -0.00669 | 2754 | 490.0936 | -58.90138 | -0.0121  |
| 2755 | 489.3797 | -60.47387 | -0.00574 | 2755 | 490.1403 | -53.86692 | -0.01494 | 2755 | 493.4134 | -58.00404 | -0.01777 | 2755 | 490.1141 | -55.29066 | -0.00675 | 2755 | 490.2707 | -58.98533 | -0.01225 |
| 2756 | 489.5708 | -60.5581  | -0.00569 | 2756 | 490.2878 | -53.88786 | -0.01509 | 2756 | 493.5996 | -58.07151 | -0.01785 | 2756 | 490.2774 | -55.35921 | -0.00665 | 2756 | 490.4415 | -59.0673  | -0.01218 |
| 2757 | 489.7106 | -60.63899 | -0.00577 | 2757 | 490.4556 | -53.90843 | -0.01509 | 2757 | 493.7632 | -58.1397  | -0.01779 | 2757 | 490.4571 | -55.43834 | -        |      |          |           |          |



|      |          |           |          |      |          |           |          |      |          |           |          |      |          |           |          |      |          |           |          |
|------|----------|-----------|----------|------|----------|-----------|----------|------|----------|-----------|----------|------|----------|-----------|----------|------|----------|-----------|----------|
| 2819 | 500.0543 | -65.70425 | -0.00632 | 2819 | 500.8461 | -56.57709 | -0.01701 | 2819 | 504.1524 | -62.24215 | -0.01991 | 2819 | 500.8434 | -60.0462  | -0.00769 | 2819 | 500.979  | -64.39179 | -0.0128  |
| 2820 | 500.2257 | -65.78195 | -0.00643 | 2820 | 501.0017 | -56.6389  | -0.01685 | 2820 | 504.3142 | -62.31007 | -0.01982 | 2820 | 501.0159 | -60.11315 | -0.00764 | 2820 | 501.1247 | -64.47716 | -0.01281 |
| 2821 | 500.9379 | -65.8574  | -0.00641 | 2821 | 501.2001 | -56.6991  | -0.0168  | 2821 | 504.4634 | -62.38601 | -0.01986 | 2821 | 501.1565 | -60.18613 | -0.00773 | 2821 | 501.3269 | -64.5628  | -0.01289 |
| 2822 | 500.5873 | -65.93246 | -0.00632 | 2822 | 501.3412 | -56.7586  | -0.01692 | 2822 | 504.6163 | -62.46077 | -0.02004 | 2822 | 501.3343 | -60.25799 | -0.00776 | 2822 | 501.4817 | -64.64941 | -0.01292 |
| 2823 | 500.7277 | -66.00322 | -0.00634 | 2823 | 501.5187 | -56.81976 | -0.01699 | 2823 | 504.8212 | -62.53268 | -0.02012 | 2823 | 501.5112 | -60.33102 | -0.00769 | 2823 | 501.6513 | -64.73135 | -0.01284 |
| 2824 | 500.8959 | -66.08142 | -0.00641 | 2824 | 501.6688 | -56.8815  | -0.01691 | 2824 | 504.9827 | -62.60098 | -0.01999 | 2824 | 501.6813 | -60.39694 | -0.00762 | 2824 | 501.7977 | -64.81786 | -0.01283 |
| 2825 | 501.0646 | -66.15973 | -0.00639 | 2825 | 501.8733 | -56.94568 | -0.01695 | 2825 | 505.13   | -62.67192 | -0.01997 | 2825 | 501.8304 | -60.46849 | -0.00771 | 2825 | 501.9094 | -64.90604 | -0.01293 |
| 2826 | 501.249  | -66.24159 | -0.00632 | 2826 | 502.0139 | -57.00025 | -0.01712 | 2826 | 505.3327 | -62.74236 | -0.02011 | 2826 | 502.0084 | -60.53855 | -0.00778 | 2826 | 502.1528 | -64.99422 | -0.01298 |
| 2827 | 501.3995 | -66.31621 | -0.00629 | 2827 | 502.1819 | -57.06226 | -0.01724 | 2827 | 505.4897 | -62.81119 | -0.02019 | 2827 | 502.1786 | -60.61166 | -0.00778 | 2827 | 502.3255 | -65.08213 | -0.01296 |
| 2828 | 501.5591 | -66.39654 | -0.00637 | 2828 | 502.3379 | -57.12194 | -0.01719 | 2828 | 505.662  | -62.87667 | -0.02013 | 2828 | 502.3585 | -60.67681 | -0.00776 | 2828 | 502.4622 | -65.16724 | -0.01295 |
| 2829 | 501.7296 | -66.4751  | -0.00638 | 2829 | 502.5381 | -57.18684 | -0.01717 | 2829 | 505.8004 | -62.94183 | -0.02004 | 2829 | 502.4945 | -60.74662 | -0.00787 | 2829 | 502.6576 | -65.26112 | -0.01305 |
| 2830 | 501.9165 | -66.55744 | -0.00631 | 2830 | 502.6902 | -57.24266 | -0.01732 | 2830 | 505.9974 | -63.01411 | -0.02015 | 2830 | 502.6759 | -60.82044 | -0.00799 | 2830 | 502.8225 | -65.34718 | -0.01314 |
| 2831 | 502.0743 | -66.63201 | -0.00629 | 2831 | 502.8601 | -57.30686 | -0.01744 | 2831 | 506.1579 | -63.08161 | -0.02026 | 2831 | 502.8503 | -60.89467 | -0.00797 | 2831 | 502.9896 | -65.43602 | -0.01307 |
| 2832 | 502.2272 | -66.71287 | -0.00637 | 2832 | 503.0138 | -57.36647 | -0.01742 | 2832 | 506.3298 | -63.14813 | -0.02017 | 2832 | 503.0273 | -60.96243 | -0.00789 | 2832 | 503.1338 | -65.52014 | -0.01303 |
| 2833 | 502.4076 | -66.79238 | -0.00642 | 2833 | 503.2102 | -57.43287 | -0.0174  | 2833 | 506.4694 | -63.21163 | -0.02007 | 2833 | 503.1658 | -61.03125 | -0.0079  | 2833 | 503.2325 | -65.61454 | -0.01308 |
| 2834 | 502.5806 | -66.87371 | -0.00638 | 2834 | 503.3702 | -57.48769 | -0.01755 | 2834 | 506.6633 | -63.28404 | -0.02022 | 2834 | 503.3443 | -61.10776 | -0.00804 | 2834 | 503.4918 | -65.70135 | -0.01312 |
| 2835 | 502.7514 | -66.94926 | -0.00637 | 2835 | 503.5244 | -57.55127 | -0.01767 | 2835 | 506.8269 | -63.34881 | -0.0203  | 2835 | 503.5159 | -61.18002 | -0.00802 | 2835 | 503.6566 | -65.79077 | -0.01307 |
| 2836 | 502.8952 | -67.02889 | -0.00647 | 2836 | 503.6867 | -57.60855 | -0.01768 | 2836 | 506.9959 | -63.41858 | -0.02031 | 2836 | 503.6969 | -61.25429 | -0.00792 | 2836 | 503.811  | -65.87747 | -0.01299 |
| 2837 | 503.0695 | -67.10908 | -0.00652 | 2837 | 503.8783 | -57.67425 | -0.01763 | 2837 | 507.1461 | -63.48172 | -0.02028 | 2837 | 503.8396 | -61.32426 | -0.00796 | 2837 | 503.9847 | -65.97135 | -0.01306 |
| 2838 | 503.2438 | -67.19054 | -0.00648 | 2838 | 504.0465 | -57.72894 | -0.0177  | 2838 | 507.3277 | -63.55651 | -0.0204  | 2838 | 504.0075 | -61.40026 | -0.00807 | 2838 | 504.1672 | -66.05878 | -0.01312 |
| 2839 | 503.4179 | -67.26685 | -0.00645 | 2839 | 504.1958 | -57.79168 | -0.01784 | 2839 | 507.5037 | -63.62373 | -0.02054 | 2839 | 504.1834 | -61.47771 | -0.00811 | 2839 | 504.3423 | -66.14873 | -0.01313 |
| 2840 | 503.5562 | -67.34393 | -0.00651 | 2840 | 504.3636 | -57.84887 | -0.01782 | 2840 | 507.6707 | -63.6971  | -0.02052 | 2840 | 504.3655 | -61.5544  | -0.00803 | 2840 | 504.4809 | -66.23376 | -0.01305 |
| 2841 | 503.7343 | -67.43034 | -0.00657 | 2841 | 504.5382 | -57.91551 | -0.01775 | 2841 | 507.817  | -63.76208 | -0.02042 | 2841 | 504.5084 | -61.62608 | -0.00799 | 2841 | 504.6498 | -66.32777 | -0.01308 |
| 2842 | 503.9089 | -67.51502 | -0.00652 | 2842 | 504.7242 | -57.97355 | -0.01778 | 2842 | 507.9891 | -63.83834 | -0.02047 | 2842 | 504.6742 | -61.70476 | -0.00813 | 2842 | 504.8348 | -66.41128 | -0.01318 |
| 2843 | 504.0867 | -67.59384 | -0.00647 | 2843 | 504.8725 | -58.03701 | -0.0179  | 2843 | 508.174  | -63.9097  | -0.02058 | 2843 | 504.8569 | -61.78219 | -0.00819 | 2843 | 504.9902 | -66.49957 | -0.01321 |
| 2844 | 504.2245 | -67.67332 | -0.00649 | 2844 | 505.0412 | -58.09668 | -0.01791 | 2844 | 508.3294 | -63.97793 | -0.02059 | 2844 | 505.0294 | -61.8612  | -0.00812 | 2844 | 505.1538 | -66.58395 | -0.01313 |
| 2845 | 504.4034 | -67.75628 | -0.00658 | 2845 | 505.2148 | -58.16354 | -0.01784 | 2845 | 508.4908 | -64.04346 | -0.02049 | 2845 | 505.1847 | -61.93188 | -0.00807 | 2845 | 505.3118 | -66.67581 | -0.01314 |
| 2846 | 504.5738 | -67.83937 | -0.00654 | 2846 | 505.4038 | -58.22226 | -0.01784 | 2846 | 508.6538 | -64.11787 | -0.02054 | 2846 | 505.3447 | -62.00888 | -0.00819 | 2846 | 505.5081 | -66.76174 | -0.01323 |
| 2847 | 504.7562 | -67.91888 | -0.00645 | 2847 | 505.5389 | -58.28468 | -0.01802 | 2847 | 508.8442 | -64.1882  | -0.02068 | 2847 | 505.3247 | -62.08384 | -0.00828 | 2847 | 505.6625 | -66.84772 | -0.01325 |
| 2848 | 504.9233 | -67.99876 | -0.00647 | 2848 | 505.7166 | -58.34756 | -0.01808 | 2848 | 508.9995 | -64.25777 | -0.02073 | 2848 | 505.6993 | -62.1634  | -0.00823 | 2848 | 505.8277 | -66.92973 | -0.01318 |
| 2849 | 505.0623 | -68.08554 | -0.00652 | 2849 | 505.8764 | -58.41192 | -0.01806 | 2849 | 509.167  | -64.32442 | -0.02056 | 2849 | 505.8612 | -62.23116 | -0.00821 | 2849 | 505.9771 | -67.01752 | -0.01316 |
| 2850 | 505.2359 | -68.17259 | -0.00652 | 2850 | 506.0715 | -58.47589 | -0.01807 | 2850 | 509.3165 | -64.39941 | -0.02037 | 2850 | 506.0122 | -62.30561 | -0.00827 | 2850 | 506.1797 | -67.10184 | -0.01323 |
| 2851 | 505.419  | -68.25887 | -0.00644 | 2851 | 506.2136 | -58.53963 | -0.01822 | 2851 | 509.5186 | -64.47082 | -0.02031 | 2851 | 506.203  | -62.37938 | -0.00839 | 2851 | 506.3274 | -67.1865  | -0.01329 |
| 2852 | 505.5633 | -68.34216 | -0.00642 | 2852 | 506.3888 | -58.60362 | -0.01834 | 2852 | 509.6706 | -64.53881 | -0.02018 | 2852 | 506.37   | -62.45152 | -0.00834 | 2852 | 506.4999 | -67.27057 | -0.01326 |
| 2853 | 505.7318 | -68.43152 | -0.00652 | 2853 | 506.5447 | -58.67061 | -0.01829 | 2853 | 509.8358 | -64.60636 | -0.01999 | 2853 | 506.5355 | -62.51961 | -0.00827 | 2853 | 506.6468 | -67.35597 | -0.01322 |
| 2854 | 505.901  | -68.51548 | -0.00655 | 2854 | 506.7463 | -58.73845 | -0.01827 | 2854 | 509.9845 | -64.67683 | -0.01979 | 2854 | 506.6804 | -62.59069 | -0.00833 | 2854 | 506.8447 | -67.44244 | -0.01331 |
| 2855 | 506.0633 | -68.60325 | -0.00649 | 2855 | 506.8868 | -58.80071 | -0.01842 | 2855 | 510.1864 | -64.74451 | -0.01991 | 2855 | 506.8713 | -62.66131 | -0.00845 | 2855 | 506.9972 | -67.52508 | -0.01339 |
| 2856 | 506.2345 | -68.68179 | -0.00648 | 2856 | 507.0619 | -58.87006 | -0.01851 | 2856 | 510.3349 | -64.81299 | -0.02009 | 2856 | 507.0372 | -62.7324  | -0.00845 | 2856 | 507.1666 | -67.60569 | -0.01336 |
| 2857 | 506.3951 | -68.76623 | -0.00658 | 2857 | 507.2224 | -58.93681 | -0.01846 | 2857 | 510.5088 | -64.87798 | -0.02016 | 2857 | 507.2081 | -62.79881 | -0.0084  | 2857 | 507.3078 | -67.68639 | -0.01328 |
| 2858 | 506.5729 | -68.84949 | -0.00661 | 2858 | 507.4158 | -59.00597 | -0.01841 | 2858 | 510.6459 | -64.9456  | -0.02024 | 2858 | 507.3472 | -62.86612 | -0.00841 | 2858 | 507.5159 | -67.77207 | -0.01335 |
| 2859 | 506.7544 | -68.93161 | -0.00655 | 2859 | 507.5664 | -59.06862 | -0.0185  | 2859 | 510.8496 | -65.0162  | -0.02052 | 2859 | 507.5376 | -62.93698 | -0.00856 | 2859 | 507.6658 | -67.85156 | -0.01342 |
| 2860 | 506.908  | -69.00527 | -0.0065  | 2860 | 507.7338 | -59.13804 | -0.01863 | 2860 | 511.0078 | -65.08289 | -0.02077 | 2860 | 507.7085 | -63.0062  | -0.00859 | 2860 | 507.8352 | -67.93548 | -0.01338 |
| 2861 | 507.0619 | -69.08475 | -0.00656 | 2861 | 507.8899 | -59.20458 | -0.01864 | 2861 | 511.173  | -65.15172 | -0.02082 | 2861 | 507.8807 | -63.07378 | -0.00849 | 2861 | 507.9795 | -68.01882 | -0.01333 |
| 2862 | 507.2416 | -69.15974 | -0.00661 | 2862 | 508.088  | -59.27264 | -0.01859 | 2862 | 511.3195 | -65.21805 | -0.02086 | 2862 | 508.0208 | -63.13969 | -0.00847 | 2862 | 508.1762 | -68.10809 | -0.01333 |
| 2863 | 507.4097 | -69.23531 | -0.00656 | 2863 | 508.2426 | -59.33416 | -0.01868 | 2863 | 511.5174 | -65.29059 | -0.021   | 2863 | 508.2094 | -63.21449 | -0.00856 | 2863 | 508.3349 | -68.19167 | -0.01342 |
| 2864 | 507.5794 | -69.30569 | -0.0065  | 2864 | 508.3964 | -59.40381 | -0.01886 | 2864 | 511.6773 | -65.363   | -0.02118 | 2864 | 508.3772 | -63.28213 | -0.00859 | 2864 | 508.5053 | -68.2809  | -0.0134  |
| 2865 | 507.7284 | -69.37373 | -0.00656 | 2865 | 508.5629 | -59.46879 | -0.01889 | 2865 | 511.8446 | -65.4365  | -0.02126 | 2865 | 508.5543 | -63.35348 | -0.00852 | 2865 | 508.6516 | -68.36279 | -0.01333 |
| 2866 | 507.9034 | -69.45191 | -0.00663 | 2866 | 508.7529 | -59.53857 | -0.01884 | 2866 | 511.994  | -65.5023  | -0.0212  | 2866 | 508.7004 | -63.42026 | -0.00847 | 2866 | 508.8376 | -68.45568 | -0.01338 |
| 2867 | 508.0793 | -69.52763 | -0.00658 | 2867 | 508.9155 | -59.60154 | -0.01888 | 2867 | 512.1757 | -65.57683 | -0.02132 | 2867 | 508.8737 | -63.49814 | -0.00859 | 2867 | 508.9302 | -68.54007 | -0.01348 |
| 2868 | 508.2498 | -69.59846 | -0.00649 | 2868 | 509.0702 | -59.67276 | -0.01903 | 2868 | 512.3518 | -65.64517 | -0.0215  | 2868 | 509.052  | -63.5661  | -0.00865 | 2868 | 509.1682 | -68.62836 | -0.01345 |
| 2869 | 508.3896 | -69.67632 | -0.00651 | 2869 | 509.235  | -59.74034 | -0.01903 | 2869 | 512.5109 | -65.71699 | -0.02157 | 2869 | 509.2253 | -63.63869 | -0.00858 | 2869 | 509.3228 | -68.71034 | -0.0135  |
| 2870 | 508.5706 | -69.75568 | -0.00657 | 2870 | 509.4149 | -59.81399 | -0.01896 | 2870 | 512.6636 | -65.77998 | -0.02158 | 2870 | 509.3736 | -63       |          |      |          |           |          |

|      |          |           |          |      |          |           |          |      |          |           |          |      |          |           |          |      |          |           |          |
|------|----------|-----------|----------|------|----------|-----------|----------|------|----------|-----------|----------|------|----------|-----------|----------|------|----------|-----------|----------|
| 2932 | 518.923  | -74.25827 | -0.00718 | 2932 | 519.812  | -64.16995 | -0.02107 | 2932 | 523.0337 | -70.02901 | -0.02335 | 2932 | 519.7535 | -68.19958 | -0.00969 | 2932 | 519.8712 | -73.84119 | -0.01411 |
| 2933 | 519.0905 | -74.33418 | -0.00721 | 2933 | 519.9835 | -64.23453 | -0.02103 | 2933 | 523.2066 | -70.10448 | -0.02333 | 2933 | 519.9388 | -68.28386 | -0.00965 | 2933 | 520.0403 | -73.92101 | -0.01418 |
| 2934 | 519.2665 | -74.40685 | -0.00714 | 2934 | 520.1261 | -64.30333 | -0.02109 | 2934 | 523.3905 | -70.11704 | -0.02348 | 2934 | 520.1179 | -68.35699 | -0.00973 | 2934 | 520.1974 | -74.00657 | -0.01426 |
| 2935 | 519.4028 | -74.48183 | -0.00714 | 2935 | 520.3009 | -64.37171 | -0.02121 | 2935 | 523.5401 | -70.24394 | -0.02359 | 2935 | 520.2706 | -68.43602 | -0.0098  | 2935 | 520.3585 | -74.08476 | -0.01423 |
| 2936 | 519.5588 | -74.56275 | -0.00722 | 2936 | 520.4756 | -64.44006 | -0.02119 | 2936 | 523.7072 | -70.30798 | -0.02366 | 2936 | 520.4288 | -68.50581 | -0.00975 | 2936 | 520.5363 | -74.17269 | -0.01415 |
| 2937 | 519.7635 | -74.63779 | -0.00723 | 2937 | 520.6531 | -64.50428 | -0.02114 | 2937 | 523.8662 | -70.38012 | -0.02351 | 2937 | 520.603  | -68.58489 | -0.0097  | 2937 | 520.7191 | -74.25178 | -0.0142  |
| 2938 | 519.9358 | -74.71462 | -0.00718 | 2938 | 520.796  | -64.56982 | -0.02123 | 2938 | 524.0683 | -70.44849 | -0.02358 | 2938 | 520.7877 | -68.6536  | -0.00976 | 2938 | 520.8593 | -74.33504 | -0.01426 |
| 2939 | 520.0783 | -74.78692 | -0.00714 | 2939 | 520.9696 | -64.63791 | -0.02141 | 2939 | 524.2054 | -70.51427 | -0.02373 | 2939 | 520.933  | -68.72669 | -0.00988 | 2939 | 521.0301 | -74.41396 | -0.01427 |
| 2940 | 520.2508 | -74.86755 | -0.00723 | 2940 | 521.1461 | -64.70753 | -0.02142 | 2940 | 524.3767 | -70.57861 | -0.0237  | 2940 | 521.0992 | -68.79334 | -0.00983 | 2940 | 521.1956 | -74.49873 | -0.01422 |
| 2941 | 520.4251 | -74.93982 | -0.00725 | 2941 | 521.3287 | -64.77367 | -0.02131 | 2941 | 524.5338 | -70.64689 | -0.02361 | 2941 | 521.2639 | -68.86996 | -0.00979 | 2941 | 521.3831 | -74.57725 | -0.01424 |
| 2942 | 520.6046 | -75.01706 | -0.00718 | 2942 | 521.463  | -64.84    | -0.02135 | 2942 | 524.735  | -70.71107 | -0.02365 | 2942 | 521.4587 | -68.94025 | -0.0099  | 2942 | 521.5247 | -74.65946 | -0.01433 |
| 2943 | 520.754  | -75.08685 | -0.00713 | 2943 | 521.6411 | -64.91426 | -0.0215  | 2943 | 524.8775 | -70.77557 | -0.0238  | 2943 | 521.6013 | -69.01404 | -0.01002 | 2943 | 521.7015 | -74.73764 | -0.01435 |
| 2944 | 520.9133 | -75.16407 | -0.00721 | 2944 | 521.8134 | -64.98704 | -0.02153 | 2944 | 525.0545 | -70.84036 | -0.02384 | 2944 | 521.7719 | -69.08312 | -0.01    | 2944 | 521.8611 | -74.8221  | -0.01426 |
| 2945 | 521.1001 | -75.23885 | -0.00725 | 2945 | 521.9936 | -65.06226 | -0.0214  | 2945 | 525.1984 | -70.90482 | -0.02375 | 2945 | 521.9263 | -69.16173 | -0.0099  | 2945 | 522.0571 | -74.90301 | -0.01426 |
| 2946 | 521.2697 | -75.31413 | -0.0072  | 2946 | 522.1395 | -65.13326 | -0.02143 | 2946 | 525.4093 | -70.97156 | -0.02376 | 2946 | 522.1324 | -69.23633 | -0.00996 | 2946 | 522.1946 | -74.98568 | -0.01431 |
| 2947 | 521.4183 | -75.38376 | -0.00715 | 2947 | 522.309  | -65.20937 | -0.02158 | 2947 | 525.5553 | -71.03162 | -0.02397 | 2947 | 522.269  | -69.31047 | -0.01008 | 2947 | 522.3721 | -75.06825 | -0.01431 |
| 2948 | 521.5739 | -75.46085 | -0.00721 | 2948 | 522.4807 | -65.28601 | -0.02165 | 2948 | 525.7243 | -71.09834 | -0.02402 | 2948 | 522.4422 | -69.38268 | -0.01003 | 2948 | 522.5273 | -75.15389 | -0.01422 |
| 2949 | 521.7686 | -75.53698 | -0.00727 | 2949 | 522.6649 | -65.36459 | -0.02157 | 2949 | 525.8738 | -71.16015 | -0.02392 | 2949 | 522.5938 | -69.45913 | -0.00987 | 2949 | 522.7284 | -75.23639 | -0.01421 |
| 2950 | 521.9331 | -75.6144  | -0.00722 | 2950 | 522.8134 | -65.4341  | -0.02152 | 2950 | 526.0754 | -71.22508 | -0.0239  | 2950 | 522.7935 | -69.53407 | -0.00985 | 2950 | 522.8654 | -75.31641 | -0.01427 |
| 2951 | 522.0945 | -75.68424 | -0.00713 | 2951 | 522.9753 | -65.51106 | -0.02167 | 2951 | 526.2257 | -71.28202 | -0.02408 | 2951 | 522.9356 | -69.60866 | -0.00997 | 2951 | 523.0396 | -75.4005  | -0.01429 |
| 2952 | 522.2435 | -75.75859 | -0.00719 | 2952 | 523.1597 | -65.58809 | -0.02174 | 2952 | 526.3945 | -71.34467 | -0.02413 | 2952 | 523.1096 | -69.68297 | -0.01    | 2952 | 523.195  | -75.47985 | -0.01426 |
| 2953 | 522.4348 | -75.83317 | -0.00725 | 2953 | 523.3383 | -65.66208 | -0.02166 | 2953 | 526.5491 | -71.40222 | -0.02403 | 2953 | 523.2505 | -69.75682 | -0.0099  | 2953 | 523.3933 | -75.56184 | -0.01427 |
| 2954 | 522.6027 | -75.90743 | -0.00722 | 2954 | 523.4893 | -65.72904 | -0.02158 | 2954 | 526.7367 | -71.46802 | -0.02397 | 2954 | 523.4606 | -69.83578 | -0.00991 | 2954 | 523.5443 | -75.63687 | -0.01435 |
| 2955 | 522.77   | -75.9746  | -0.00715 | 2955 | 523.6496 | -65.80253 | -0.0217  | 2955 | 526.9209 | -71.52327 | -0.02412 | 2955 | 523.6068 | -69.90443 | -0.01003 | 2955 | 523.7087 | -75.71761 | -0.01444 |
| 2956 | 522.9133 | -76.04969 | -0.00716 | 2956 | 523.8279 | -65.87232 | -0.0218  | 2956 | 527.0558 | -71.58417 | -0.0242  | 2956 | 523.772  | -69.98318 | -0.01012 | 2956 | 523.8665 | -75.79608 | -0.01452 |
| 2957 | 523.1039 | -76.12395 | -0.00724 | 2957 | 524.0027 | -65.94423 | -0.02178 | 2957 | 527.2164 | -71.64121 | -0.02414 | 2957 | 523.9255 | -70.05771 | -0.01004 | 2957 | 524.064  | -75.8757  | -0.01441 |
| 2958 | 523.2688 | -76.19801 | -0.0072  | 2958 | 524.1671 | -66.01023 | -0.02173 | 2958 | 527.3796 | -71.70831 | -0.02401 | 2958 | 524.124  | -70.13662 | -0.01    | 2958 | 524.2122 | -75.94756 | -0.01447 |
| 2959 | 523.4377 | -76.27008 | -0.00713 | 2959 | 524.313  | -66.08082 | -0.02187 | 2959 | 527.5761 | -71.7654  | -0.02415 | 2959 | 524.2799 | -70.2074  | -0.01011 | 2959 | 524.3768 | -76.02795 | -0.01454 |
| 2960 | 523.5827 | -76.34563 | -0.00712 | 2960 | 524.4966 | -66.15523 | -0.02205 | 2960 | 527.7201 | -71.8305  | -0.02427 | 2960 | 524.4432 | -70.28529 | -0.01017 | 2960 | 524.5364 | -76.10403 | -0.01452 |
| 2961 | 523.7699 | -76.42008 | -0.00722 | 2961 | 524.6741 | -66.22943 | -0.02206 | 2961 | 527.885  | -71.89217 | -0.02421 | 2961 | 524.6008 | -70.35735 | -0.01007 | 2961 | 524.7199 | -76.1837  | -0.01445 |
| 2962 | 523.9367 | -76.50108 | -0.00724 | 2962 | 524.8375 | -66.29977 | -0.02201 | 2962 | 528.0759 | -71.96344 | -0.02411 | 2962 | 524.7808 | -70.43707 | -0.01    | 2962 | 524.8886 | -76.25512 | -0.01445 |
| 2963 | 524.1141 | -76.57694 | -0.00719 | 2963 | 524.9834 | -66.37756 | -0.0221  | 2963 | 528.2426 | -72.03001 | -0.02416 | 2963 | 524.9535 | -70.50596 | -0.01006 | 2963 | 525.0404 | -76.33417 | -0.01452 |
| 2964 | 524.2543 | -76.64812 | -0.00722 | 2964 | 525.1692 | -66.4548  | -0.02222 | 2964 | 528.39   | -72.10217 | -0.02424 | 2964 | 525.1097 | -70.57934 | -0.01015 | 2964 | 525.2039 | -76.4111  | -0.01452 |
| 2965 | 524.4404 | -76.72681 | -0.00728 | 2965 | 525.3357 | -66.53239 | -0.02223 | 2965 | 528.5543 | -72.16887 | -0.02421 | 2965 | 525.2664 | -70.64708 | -0.0101  | 2965 | 525.392  | -76.4939  | -0.01445 |
| 2966 | 524.6144 | -76.79612 | -0.00732 | 2966 | 525.5131 | -66.60572 | -0.02213 | 2966 | 528.7184 | -72.24448 | -0.02408 | 2966 | 525.454  | -70.72477 | -0.01003 | 2966 | 525.564  | -76.56641 | -0.01446 |
| 2967 | 524.7866 | -76.86459 | -0.00727 | 2967 | 525.6517 | -66.68212 | -0.02213 | 2967 | 528.9166 | -72.31389 | -0.02416 | 2967 | 525.6252 | -70.78883 | -0.01012 | 2967 | 525.7073 | -76.64066 | -0.01452 |
| 2968 | 524.9323 | -76.92677 | -0.00722 | 2968 | 525.8327 | -66.76336 | -0.02225 | 2968 | 529.0491 | -72.38743 | -0.02438 | 2968 | 525.777  | -70.86039 | -0.01029 | 2968 | 525.881  | -76.7209  | -0.01457 |
| 2969 | 525.1089 | -76.99799 | -0.00728 | 2969 | 526.0042 | -66.8398  | -0.02226 | 2969 | 529.2261 | -72.45727 | -0.02449 | 2969 | 525.9461 | -70.9285  | -0.01032 | 2969 | 526.0605 | -76.80225 | -0.01451 |
| 2970 | 525.2839 | -77.06091 | -0.00731 | 2970 | 526.182  | -66.91585 | -0.02216 | 2970 | 529.3838 | -72.53384 | -0.0245  | 2970 | 526.1192 | -71.00216 | -0.01025 | 2970 | 526.2363 | -76.87273 | -0.0145  |
| 2971 | 525.4544 | -77.1242  | -0.00723 | 2971 | 526.3211 | -66.99004 | -0.02216 | 2971 | 529.5826 | -72.60187 | -0.02464 | 2971 | 526.3005 | -71.06804 | -0.01031 | 2971 | 526.3787 | -76.94795 | -0.01458 |
| 2972 | 525.6057 | -77.18355 | -0.0072  | 2972 | 526.4996 | -67.07169 | -0.02231 | 2972 | 529.7902 | -72.6712  | -0.02493 | 2972 | 526.4463 | -71.13479 | -0.01045 | 2972 | 526.5513 | -77.01884 | -0.01465 |
| 2973 | 525.7684 | -77.25322 | -0.00725 | 2973 | 526.6751 | -67.14799 | -0.02238 | 2973 | 529.9201 | -72.73796 | -0.02507 | 2973 | 526.6114 | -71.19772 | -0.01046 | 2973 | 526.72   | -77.09823 | -0.01463 |
| 2974 | 525.9538 | -77.31857 | -0.00729 | 2974 | 526.8473 | -67.22523 | -0.0223  | 2974 | 530.0443 | -72.80273 | -0.02498 | 2974 | 526.7791 | -71.27053 | -0.01036 | 2974 | 526.9118 | -77.16879 | -0.01462 |
| 2975 | 526.1248 | -77.38631 | -0.00724 | 2975 | 526.9938 | -67.29894 | -0.02238 | 2975 | 530.2542 | -72.86982 | -0.02499 | 2975 | 526.9736 | -71.34421 | -0.01034 | 2975 | 527.0482 | -77.24039 | -0.01472 |
| 2976 | 526.2739 | -77.45032 | -0.00718 | 2976 | 527.166  | -67.38108 | -0.02246 | 2976 | 530.3937 | -72.92557 | -0.02517 | 2976 | 527.1075 | -71.39867 | -0.01045 | 2976 | 527.2027 | -77.31255 | -0.01479 |
| 2977 | 526.4345 | -77.52379 | -0.00727 | 2977 | 527.3472 | -67.45901 | -0.02252 | 2977 | 530.562  | -72.98693 | -0.02524 | 2977 | 527.2836 | -71.46382 | -0.01051 | 2977 | 527.3871 | -77.3895  | -0.01476 |
| 2978 | 526.6273 | -77.59495 | -0.00735 | 2978 | 527.5222 | -67.53743 | -0.02245 | 2978 | 530.7147 | -73.04494 | -0.02512 | 2978 | 527.4445 | -71.536   | -0.01042 | 2978 | 527.5786 | -77.46317 | -0.0147  |
| 2979 | 526.7932 | -77.66847 | -0.00733 | 2979 | 527.6662 | -67.61123 | -0.02239 | 2979 | 530.915  | -73.10599 | -0.02520 | 2979 | 527.639  | -71.6031  | -0.01039 | 2979 | 527.7159 | -77.53407 | -0.01475 |
| 2980 | 526.9517 | -77.73551 | -0.00728 | 2980 | 527.83   | -67.69273 | -0.02249 | 2980 | 531.0619 | -73.16916 | -0.02517 | 2980 | 527.7792 | -71.66829 | -0.01054 | 2980 | 527.8933 | -77.61234 | -0.01481 |
| 2981 | 527.1039 | -77.80948 | -0.00734 | 2981 | 528.0177 | -67.77279 | -0.02261 | 2981 | 531.2266 | -73.21762 | -0.02528 | 2981 | 527.9581 | -71.7396  | -0.0106  | 2981 | 528.0529 | -77.68761 | -0.01476 |
| 2982 | 527.2902 | -77.88425 | -0.00745 | 2982 | 528.1856 | -67.85004 | -0.02256 | 2982 | 531.384  | -73.27924 | -0.02515 | 2982 | 528.111  | -71.8103  | -0.0105  | 2982 | 528.247  | -77.76714 | -0.01482 |
| 2983 | 527.4535 | -77.95887 | -0.00745 | 2983 | 528.34   | -67.92472 | -0.02248 | 2983 | 531.5768 | -73.3345  | -0.02506 | 2983 | 528.3086 | -71.88186 | -0.0104  | 2983 | 528.3883 |           |          |

|      |          |           |          |      |          |           |          |      |          |           |          |      |          |           |          |      |          |           |          |
|------|----------|-----------|----------|------|----------|-----------|----------|------|----------|-----------|----------|------|----------|-----------|----------|------|----------|-----------|----------|
| 3045 | 537.7986 | -82.52724 | -0.00812 | 3045 | 538.6974 | -72.53071 | -0.02437 | 3045 | 541.9176 | -76.98292 | -0.02704 | 3045 | 538.6516 | -76.34744 | -0.01175 | 3045 | 538.7327 | -82.95097 | -0.01544 |
| 3046 | 537.967  | -82.64638 | -0.00807 | 3046 | 538.8463 | -72.60539 | -0.02441 | 3046 | 542.0828 | -77.02977 | -0.02705 | 3046 | 538.7965 | -76.41067 | -0.0117  | 3046 | 538.8984 | -83.04023 | -0.01551 |
| 3047 | 538.1152 | -82.72079 | -0.00805 | 3047 | 539.0483 | -72.68121 | -0.0245  | 3047 | 542.2277 | -77.08508 | -0.02726 | 3047 | 538.965  | -76.48104 | -0.01179 | 3047 | 539.0828 | -83.127   | -0.01555 |
| 3048 | 538.308  | -82.79842 | -0.00816 | 3048 | 539.2033 | -72.75437 | -0.02459 | 3048 | 542.4013 | -77.13961 | -0.02734 | 3048 | 539.1437 | -76.54816 | -0.01183 | 3048 | 539.2528 | -83.21144 | -0.0155  |
| 3049 | 538.4684 | -82.87425 | -0.00818 | 3049 | 539.3674 | -72.82516 | -0.02448 | 3049 | 542.5764 | -77.19444 | -0.02728 | 3049 | 539.3189 | -76.61467 | -0.01173 | 3049 | 539.4052 | -83.29332 | -0.01548 |
| 3050 | 538.6386 | -82.94496 | -0.00813 | 3050 | 539.5183 | -72.8978  | -0.02446 | 3050 | 542.7554 | -77.24281 | -0.02726 | 3050 | 539.4686 | -76.67749 | -0.01168 | 3050 | 539.5694 | -83.37656 | -0.01557 |
| 3051 | 538.7775 | -83.0157  | -0.00811 | 3051 | 539.7213 | -72.97221 | -0.02459 | 3051 | 542.8995 | -77.29862 | -0.0274  | 3051 | 539.6289 | -76.74622 | -0.01174 | 3051 | 539.7462 | -83.45962 | -0.01564 |
| 3052 | 538.9786 | -83.09453 | -0.0082  | 3052 | 539.8732 | -73.0434  | -0.02471 | 3052 | 543.07   | -77.34905 | -0.02748 | 3052 | 539.8134 | -76.81413 | -0.01183 | 3052 | 539.923  | -83.5428  | -0.01558 |
| 3053 | 539.1387 | -83.16601 | -0.00826 | 3053 | 540.0456 | -73.11105 | -0.02463 | 3053 | 543.2412 | -77.40736 | -0.02735 | 3053 | 539.9859 | -76.88266 | -0.01181 | 3053 | 540.081  | -83.61633 | -0.01555 |
| 3054 | 539.3047 | -83.24162 | -0.00822 | 3054 | 540.1865 | -73.17667 | -0.02461 | 3054 | 543.431  | -77.45937 | -0.02729 | 3054 | 540.1415 | -76.94389 | -0.01171 | 3054 | 540.2313 | -83.69742 | -0.01563 |
| 3055 | 539.4525 | -83.31316 | -0.00819 | 3055 | 540.3831 | -73.24886 | -0.02473 | 3055 | 543.5632 | -77.51297 | -0.02744 | 3055 | 540.2994 | -77.01212 | -0.0118  | 3055 | 540.414  | -83.77663 | -0.01568 |
| 3056 | 539.6372 | -83.39519 | -0.00827 | 3056 | 540.544  | -73.31413 | -0.02482 | 3056 | 543.7445 | -77.56866 | -0.02758 | 3056 | 540.486  | -77.07944 | -0.01191 | 3056 | 540.584  | -83.8586  | -0.01562 |
| 3057 | 539.8063 | -83.46967 | -0.00834 | 3057 | 540.7175 | -73.38135 | -0.0248  | 3057 | 543.9123 | -77.62534 | -0.02756 | 3057 | 540.6517 | -77.14838 | -0.01189 | 3057 | 540.7466 | -83.93279 | -0.01553 |
| 3058 | 539.9727 | -83.54886 | -0.0083  | 3058 | 540.8575 | -73.44185 | -0.02472 | 3058 | 544.1013 | -77.67866 | -0.0275  | 3058 | 540.8146 | -77.21265 | -0.01185 | 3058 | 540.8991 | -84.01492 | -0.01555 |
| 3059 | 540.1263 | -83.62096 | -0.00825 | 3059 | 541.0547 | -73.51425 | -0.02479 | 3059 | 544.2379 | -77.72842 | -0.02765 | 3059 | 540.9625 | -77.2804  | -0.01188 | 3059 | 541.082  | -84.09757 | -0.01562 |
| 3060 | 540.2965 | -83.70303 | -0.00829 | 3060 | 541.2171 | -73.57558 | -0.02491 | 3060 | 544.4155 | -77.78359 | -0.02779 | 3060 | 541.1497 | -77.35046 | -0.01202 | 3060 | 541.2471 | -84.1824  | -0.0156  |
| 3061 | 540.4794 | -83.77747 | -0.00838 | 3061 | 541.3872 | -73.64281 | -0.02486 | 3061 | 544.5768 | -77.83833 | -0.02778 | 3061 | 541.3196 | -77.42172 | -0.01203 | 3061 | 541.4216 | -84.26189 | -0.01555 |
| 3062 | 540.6395 | -83.85294 | -0.00836 | 3062 | 541.5377 | -73.70234 | -0.02476 | 3062 | 544.7478 | -77.89352 | -0.02775 | 3062 | 541.4852 | -77.4855  | -0.01193 | 3062 | 541.564  | -84.34562 | -0.01559 |
| 3063 | 540.7971 | -83.92388 | -0.00831 | 3063 | 541.7172 | -73.77035 | -0.02482 | 3063 | 544.9105 | -77.94181 | -0.02782 | 3063 | 541.6246 | -77.553   | -0.01194 | 3063 | 541.7453 | -84.4306  | -0.0157  |
| 3064 | 540.9658 | -84.0025  | -0.00833 | 3064 | 541.8947 | -73.82845 | -0.02494 | 3064 | 545.0772 | -77.99886 | -0.028   | 3064 | 541.8165 | -77.62631 | -0.01203 | 3064 | 541.9172 | -84.51764 | -0.01575 |
| 3065 | 541.1528 | -84.07169 | -0.0084  | 3065 | 542.0593 | -73.89085 | -0.02495 | 3065 | 545.247  | -78.05287 | -0.02801 | 3065 | 541.9803 | -77.6967  | -0.01206 | 3065 | 542.0193 | -84.59652 | -0.01571 |
| 3066 | 541.3105 | -84.14358 | -0.0084  | 3066 | 542.2114 | -73.94629 | -0.02487 | 3066 | 545.4384 | -78.11047 | -0.02795 | 3066 | 542.1544 | -77.76546 | -0.01193 | 3066 | 542.2286 | -84.67793 | -0.01574 |
| 3067 | 541.4757 | -84.21119 | -0.00835 | 3067 | 542.3845 | -74.01077 | -0.02491 | 3067 | 545.6283 | -78.16018 | -0.02796 | 3067 | 542.2997 | -77.83556 | -0.01194 | 3067 | 542.4143 | -84.76339 | -0.01582 |
| 3068 | 541.6267 | -84.28376 | -0.00835 | 3068 | 542.5706 | -74.06621 | -0.025   | 3068 | 545.7524 | -78.21873 | -0.02807 | 3068 | 542.4851 | -77.90936 | -0.01206 | 3068 | 542.58   | -84.84098 | -0.01587 |
| 3069 | 541.8259 | -84.35339 | -0.00844 | 3069 | 542.7266 | -74.12553 | -0.02504 | 3069 | 545.9226 | -78.27157 | -0.02812 | 3069 | 542.6547 | -77.97954 | -0.01209 | 3069 | 542.7581 | -84.92165 | -0.01581 |
| 3070 | 541.983  | -84.42284 | -0.00846 | 3070 | 542.887  | -74.1974  | -0.02496 | 3070 | 546.1056 | -78.32864 | -0.02796 | 3070 | 542.8251 | -78.04943 | -0.01202 | 3070 | 542.9031 | -84.99714 | -0.01578 |
| 3071 | 542.1441 | -84.48731 | -0.00843 | 3071 | 543.0512 | -74.24149 | -0.02497 | 3071 | 546.265  | -78.37652 | -0.02793 | 3071 | 542.9672 | -78.11513 | -0.01197 | 3071 | 543.0763 | -85.08084 | -0.01586 |
| 3072 | 542.2913 | -84.55904 | -0.00841 | 3072 | 543.2425 | -74.29568 | -0.02509 | 3072 | 546.4191 | -78.43031 | -0.02804 | 3072 | 543.1491 | -78.19016 | -0.01209 | 3072 | 543.2523 | -85.15668 | -0.01589 |
| 3073 | 542.499  | -84.62913 | -0.0085  | 3073 | 543.3977 | -74.35272 | -0.02515 | 3073 | 546.5892 | -78.48155 | -0.02809 | 3073 | 543.3234 | -78.25616 | -0.01217 | 3073 | 543.4228 | -85.23801 | -0.01583 |
| 3074 | 542.6509 | -84.69788 | -0.00854 | 3074 | 543.5689 | -74.40501 | -0.0251  | 3074 | 546.774  | -78.53434 | -0.02803 | 3074 | 543.4902 | -78.32673 | -0.01213 | 3074 | 543.5668 | -85.31284 | -0.01578 |
| 3075 | 542.8239 | -84.76648 | -0.00849 | 3075 | 543.7174 | -74.46357 | -0.02508 | 3075 | 546.9401 | -78.59093 | -0.028   | 3075 | 543.6375 | -78.39069 | -0.01211 | 3075 | 543.7361 | -85.39998 | -0.01586 |
| 3076 | 542.9704 | -84.83152 | -0.00849 | 3076 | 543.9196 | -74.51904 | -0.0252  | 3076 | 547.0864 | -78.63527 | -0.02818 | 3076 | 543.8098 | -78.46504 | -0.0122  | 3076 | 543.9229 | -85.47947 | -0.01591 |
| 3077 | 543.1682 | -84.90184 | -0.00858 | 3077 | 544.0697 | -74.57467 | -0.0253  | 3077 | 547.2653 | -78.685   | -0.0283  | 3077 | 543.9932 | -78.5335  | -0.01231 | 3077 | 544.089  | -85.56042 | -0.01586 |
| 3078 | 543.3265 | -84.97106 | -0.00862 | 3078 | 544.2391 | -74.62833 | -0.02522 | 3078 | 547.4366 | -78.73708 | -0.0282  | 3078 | 544.1594 | -78.60568 | -0.01229 | 3078 | 544.2423 | -85.63629 | -0.0158  |
| 3079 | 543.5    | -85.03664 | -0.00857 | 3079 | 544.3865 | -74.68787 | -0.02517 | 3079 | 547.6124 | -78.78329 | -0.02814 | 3079 | 544.3163 | -78.67266 | -0.01219 | 3079 | 544.4056 | -85.71589 | -0.01587 |
| 3080 | 543.634  | -85.10138 | -0.00855 | 3080 | 544.5911 | -74.74702 | -0.02529 | 3080 | 547.7641 | -78.83524 | -0.02825 | 3080 | 544.4769 | -78.74921 | -0.01225 | 3080 | 544.5897 | -85.79868 | -0.01595 |
| 3081 | 543.8313 | -85.17374 | -0.00865 | 3081 | 544.7384 | -74.80581 | -0.02535 | 3081 | 547.9347 | -78.88599 | -0.02837 | 3081 | 544.6658 | -78.82181 | -0.01237 | 3081 | 544.7587 | -85.87712 | -0.01592 |
| 3082 | 543.9917 | -85.24101 | -0.00874 | 3082 | 544.9111 | -74.8624  | -0.02528 | 3082 | 548.1085 | -78.94041 | -0.02827 | 3082 | 544.8267 | -78.8949  | -0.01238 | 3082 | 544.9163 | -85.95206 | -0.01588 |
| 3083 | 544.1618 | -85.30994 | -0.0087  | 3083 | 545.0538 | -74.92223 | -0.02523 | 3083 | 548.2923 | -78.98724 | -0.02818 | 3083 | 544.9841 | -78.9622  | -0.01233 | 3083 | 545.0686 | -86.02795 | -0.01595 |
| 3084 | 544.3068 | -85.37741 | -0.00867 | 3084 | 545.2535 | -74.98738 | -0.02532 | 3084 | 548.4233 | -79.03685 | -0.02826 | 3084 | 545.1438 | -79.03813 | -0.01236 | 3084 | 545.2624 | -86.10606 | -0.01604 |
| 3085 | 544.4623 | -85.45345 | -0.00877 | 3085 | 545.4092 | -75.04846 | -0.02541 | 3085 | 548.6006 | -79.09159 | -0.02837 | 3085 | 545.3376 | -79.10664 | -0.01251 | 3085 | 545.4282 | -86.18314 | -0.01604 |
| 3086 | 544.6269 | -85.52659 | -0.00883 | 3086 | 545.5814 | -75.11262 | -0.02536 | 3086 | 548.7753 | -79.14668 | -0.02835 | 3086 | 545.4924 | -79.17645 | -0.01257 | 3086 | 545.5867 | -86.25459 | -0.01596 |
| 3087 | 544.8295 | -85.60408 | -0.0088  | 3087 | 545.7208 | -75.17523 | -0.02528 | 3087 | 548.957  | -79.20327 | -0.02822 | 3087 | 545.6583 | -79.24164 | -0.0125  | 3087 | 545.7383 | -86.33044 | -0.01599 |
| 3088 | 544.978  | -85.67655 | -0.00875 | 3088 | 545.9221 | -75.2507  | -0.02535 | 3088 | 549.0949 | -79.25681 | -0.02829 | 3088 | 545.8048 | -79.30886 | -0.01247 | 3088 | 545.9328 | -86.40647 | -0.01608 |
| 3089 | 545.1553 | -85.7615  | -0.00877 | 3089 | 546.0808 | -75.31638 | -0.02547 | 3089 | 549.273  | -79.31815 | -0.02844 | 3089 | 546.004  | -79.37849 | -0.01259 | 3089 | 546.0966 | -86.48261 | -0.0161  |
| 3090 | 545.3328 | -85.83978 | -0.00883 | 3090 | 546.2461 | -75.38899 | -0.02545 | 3090 | 549.4355 | -79.37805 | -0.02848 | 3090 | 546.1644 | -79.44476 | -0.01263 | 3090 | 546.2648 | -86.55408 | -0.01605 |
| 3091 | 545.4946 | -85.92237 | -0.00882 | 3091 | 546.4011 | -75.45856 | -0.0254  | 3091 | 549.6277 | -79.44232 | -0.02843 | 3091 | 546.3323 | -79.50787 | -0.01252 | 3091 | 546.4091 | -86.62687 | -0.01607 |
| 3092 | 545.6489 | -86.00003 | -0.00875 | 3092 | 546.5823 | -75.53462 | -0.02541 | 3092 | 549.7739 | -79.49911 | -0.02847 | 3092 | 546.48   | -79.5747  | -0.01251 | 3092 | 546.6021 | -86.7053  | -0.01616 |
| 3093 | 545.8131 | -86.08798 | -0.00876 | 3093 | 546.7534 | -75.6064  | -0.0255  | 3093 | 549.9369 | -79.56211 | -0.02865 | 3093 | 546.6815 | -79.64284 | -0.01262 | 3093 | 546.7648 | -86.78381 | -0.0162  |
| 3094 | 546.0023 | -86.16959 | -0.00882 | 3094 | 546.9155 | -75.67805 | -0.02554 | 3094 | 550.1096 | -79.62521 | -0.02866 | 3094 | 546.8328 | -79.70742 | -0.01271 | 3094 | 546.9384 | -86.85873 | -0.01617 |
| 3095 | 546.1589 | -86.25572 | -0.00884 | 3095 | 547.0678 | -75.74449 | -0.02543 | 3095 | 550.2919 | -79.68751 | -0.02856 | 3095 | 547.0035 | -79.77119 | -0.01263 | 3095 | 547.0871 | -86.93471 | -0.01615 |
| 3096 | 546.3239 | -86.33576 | -0.00879 | 3096 | 547.2461 | -75.81972 | -0.02544 | 3096 | 550.443  | -79.74215 | -0.02854 | 3096 | 547.1426 | -79.8357  | -0.01259 | 3096 | 5        |           |          |

|      |          |           |          |      |          |           |          |      |          |           |          |      |          |           |          |      |          |           |          |
|------|----------|-----------|----------|------|----------|-----------|----------|------|----------|-----------|----------|------|----------|-----------|----------|------|----------|-----------|----------|
| 3158 | 556.6713 | -91.18224 | -0.00961 | 3158 | 557.6241 | -79.74782 | -0.02651 | 3158 | 560.8181 | -83.07649 | -0.03025 | 3158 | 557.5101 | -84.12823 | -0.01397 | 3158 | 557.6488 | -91.96253 | -0.01709 |
| 3159 | 556.824  | -91.26404 | -0.00958 | 3159 | 557.8077 | -79.81293 | -0.02658 | 3159 | 560.9661 | -83.1253  | -0.03036 | 3159 | 557.7168 | -84.19597 | -0.01398 | 3159 | 557.8099 | -92.04394 | -0.01716 |
| 3160 | 557.0305 | -91.34327 | -0.00966 | 3160 | 557.9525 | -79.88394 | -0.02669 | 3160 | 561.1545 | -83.17679 | -0.03051 | 3160 | 557.8611 | -84.25371 | -0.01409 | 3160 | 557.9078 | -92.12978 | -0.01714 |
| 3161 | 557.174  | -91.42139 | -0.00974 | 3161 | 558.1256 | -79.95049 | -0.02665 | 3161 | 561.3267 | -83.22943 | -0.03052 | 3161 | 558.0297 | -84.32048 | -0.01415 | 3161 | 558.1216 | -92.20294 | -0.01707 |
| 3162 | 557.3478 | -91.49685 | -0.00971 | 3162 | 558.2863 | -80.02463 | -0.02652 | 3162 | 561.4942 | -83.27216 | -0.03039 | 3162 | 558.1841 | -84.38099 | -0.01405 | 3162 | 558.3112 | -92.30233 | -0.01708 |
| 3163 | 557.4929 | -91.57629 | -0.00968 | 3163 | 558.4819 | -80.09361 | -0.02652 | 3163 | 561.6371 | -83.31874 | -0.03043 | 3163 | 558.376  | -84.44865 | -0.01401 | 3163 | 558.4809 | -92.38568 | -0.01714 |
| 3164 | 557.6945 | -91.65301 | -0.00974 | 3164 | 558.6218 | -80.16308 | -0.02661 | 3164 | 561.8288 | -83.36829 | -0.03061 | 3164 | 558.5385 | -84.50673 | -0.01412 | 3164 | 558.6354 | -92.47303 | -0.01719 |
| 3165 | 557.8458 | -91.72579 | -0.00982 | 3165 | 558.7951 | -80.22899 | -0.02659 | 3165 | 561.9954 | -83.41497 | -0.03062 | 3165 | 558.7011 | -84.57147 | -0.01421 | 3165 | 558.7905 | -92.55559 | -0.01715 |
| 3166 | 558.02   | -91.80102 | -0.00981 | 3166 | 558.9513 | -80.30055 | -0.02652 | 3166 | 562.1721 | -83.4586  | -0.03046 | 3166 | 558.8513 | -84.62904 | -0.01416 | 3166 | 558.9754 | -92.64796 | -0.01716 |
| 3167 | 558.1573 | -91.86996 | -0.00977 | 3167 | 559.1541 | -80.36245 | -0.02652 | 3167 | 562.3172 | -83.50066 | -0.03046 | 3167 | 559.0452 | -84.69601 | -0.01412 | 3167 | 559.1508 | -92.7317  | -0.01726 |
| 3168 | 558.3647 | -91.94724 | -0.00982 | 3168 | 559.2896 | -80.42396 | -0.02662 | 3168 | 562.4959 | -83.54885 | -0.03061 | 3168 | 559.2133 | -84.75056 | -0.01421 | 3168 | 559.3061 | -92.81829 | -0.01731 |
| 3169 | 558.52   | -92.01414 | -0.0099  | 3169 | 559.4699 | -80.48576 | -0.02665 | 3169 | 562.6685 | -83.59392 | -0.03069 | 3169 | 559.3596 | -84.81448 | -0.01432 | 3169 | 559.4694 | -92.89768 | -0.01725 |
| 3170 | 558.686  | -92.08596 | -0.00992 | 3170 | 559.6199 | -80.54624 | -0.02658 | 3170 | 562.846  | -83.63751 | -0.03056 | 3170 | 559.5269 | -84.87154 | -0.0143  | 3170 | 559.6336 | -92.98543 | -0.01726 |
| 3171 | 558.8344 | -92.15236 | -0.00987 | 3171 | 559.8259 | -80.60818 | -0.02656 | 3171 | 562.9855 | -83.67892 | -0.0305  | 3171 | 559.7092 | -84.93684 | -0.01423 | 3171 | 559.8234 | -93.06404 | -0.01732 |
| 3172 | 559.0278 | -92.22753 | -0.00992 | 3172 | 559.9692 | -80.66503 | -0.02668 | 3172 | 563.1646 | -83.72975 | -0.03062 | 3172 | 559.8857 | -84.99432 | -0.01432 | 3172 | 559.9738 | -93.14752 | -0.01739 |
| 3173 | 559.1924 | -92.29506 | -0.00998 | 3173 | 560.1395 | -80.72409 | -0.02671 | 3173 | 563.3448 | -83.77508 | -0.03069 | 3173 | 560.0327 | -85.05501 | -0.01443 | 3173 | 560.1375 | -93.22533 | -0.01735 |
| 3174 | 559.3546 | -92.36701 | -0.01    | 3174 | 560.2924 | -80.78065 | -0.02666 | 3174 | 563.5128 | -83.8222  | -0.03053 | 3174 | 560.202  | -85.11228 | -0.01444 | 3174 | 560.2983 | -93.30791 | -0.0173  |
| 3175 | 559.5078 | -92.43213 | -0.00993 | 3175 | 560.4947 | -80.84193 | -0.02667 | 3175 | 563.6599 | -83.86457 | -0.03044 | 3175 | 560.3729 | -85.17573 | -0.01434 | 3175 | 560.4932 | -93.38742 | -0.01738 |
| 3176 | 559.6846 | -92.50856 | -0.00992 | 3176 | 560.6422 | -80.89563 | -0.02676 | 3176 | 563.8277 | -83.91516 | -0.03055 | 3176 | 560.5635 | -85.2351  | -0.01438 | 3176 | 560.6353 | -93.46774 | -0.01745 |
| 3177 | 559.8635 | -92.57762 | -0.01    | 3177 | 560.8082 | -80.9559  | -0.02683 | 3177 | 564.0109 | -83.96549 | -0.03067 | 3177 | 560.7037 | -85.29271 | -0.01452 | 3177 | 560.8085 | -93.54552 | -0.0174  |
| 3178 | 560.0184 | -92.65118 | -0.01002 | 3178 | 560.9664 | -81.01029 | -0.02675 | 3178 | 564.1843 | -84.01443 | -0.03057 | 3178 | 560.8766 | -85.35044 | -0.01458 | 3178 | 560.9614 | -93.63007 | -0.01736 |
| 3179 | 560.1738 | -92.71807 | -0.00999 | 3179 | 561.1549 | -81.07116 | -0.02668 | 3179 | 564.3362 | -84.0593  | -0.03051 | 3179 | 561.0419 | -85.41447 | -0.01448 | 3179 | 561.1611 | -93.70862 | -0.01741 |
| 3180 | 560.3457 | -92.79008 | -0.00998 | 3180 | 561.3146 | -81.12492 | -0.02679 | 3180 | 564.4955 | -84.11225 | -0.03065 | 3180 | 561.2366 | -85.47101 | -0.01446 | 3180 | 561.3074 | -93.78934 | -0.01749 |
| 3181 | 560.5288 | -92.87129 | -0.01008 | 3181 | 561.474  | -81.18767 | -0.02689 | 3181 | 564.6829 | -84.16457 | -0.0308  | 3181 | 561.3705 | -85.52724 | -0.01446 | 3181 | 561.4745 | -93.86827 | -0.01748 |
| 3182 | 560.6802 | -92.95046 | -0.01014 | 3182 | 561.6341 | -81.24468 | -0.02684 | 3182 | 564.851  | -84.21628 | -0.03078 | 3182 | 561.552  | -85.58554 | -0.01464 | 3182 | 561.6293 | -93.9524  | -0.01742 |
| 3183 | 560.8477 | -93.02436 | -0.01009 | 3183 | 561.8244 | -81.30922 | -0.02676 | 3183 | 565.0066 | -84.26656 | -0.03068 | 3183 | 561.7032 | -85.64735 | -0.01454 | 3183 | 561.8323 | -94.03725 | -0.01747 |
| 3184 | 561.0078 | -93.10487 | -0.01005 | 3184 | 561.9974 | -81.36313 | -0.02688 | 3184 | 565.1624 | -84.32269 | -0.0308  | 3184 | 561.9025 | -85.70885 | -0.01452 | 3184 | 561.9757 | -94.11485 | -0.01757 |
| 3185 | 561.2061 | -93.18152 | -0.01014 | 3185 | 562.1435 | -81.42638 | -0.027   | 3185 | 565.351  | -84.37892 | -0.03091 | 3185 | 562.0425 | -85.76659 | -0.01463 | 3185 | 562.1491 | -94.19894 | -0.01758 |
| 3186 | 561.3544 | -93.25854 | -0.01022 | 3186 | 562.3108 | -81.48124 | -0.02695 | 3186 | 565.5146 | -84.43757 | -0.03088 | 3186 | 562.2158 | -85.83166 | -0.01472 | 3186 | 562.2939 | -94.27914 | -0.01752 |
| 3187 | 561.5186 | -93.33208 | -0.01018 | 3187 | 562.4923 | -81.54593 | -0.02688 | 3187 | 565.6826 | -84.49089 | -0.03076 | 3187 | 562.3778 | -85.89394 | -0.01467 | 3187 | 562.4924 | -94.36693 | -0.01757 |
| 3188 | 561.6716 | -93.41353 | -0.01017 | 3188 | 562.6674 | -81.60061 | -0.02694 | 3188 | 565.8294 | -84.54489 | -0.0308  | 3188 | 562.5728 | -85.95993 | -0.01463 | 3188 | 562.6456 | -94.46093 | -0.01765 |
| 3189 | 561.8732 | -93.48921 | -0.01025 | 3189 | 562.8159 | -81.6608  | -0.02706 | 3189 | 566.0206 | -84.60413 | -0.03095 | 3189 | 562.7167 | -86.01796 | -0.01474 | 3189 | 562.8142 | -94.53509 | -0.0177  |
| 3190 | 562.015  | -93.56696 | -0.01035 | 3190 | 562.9824 | -81.718   | -0.02707 | 3190 | 566.1924 | -84.66342 | -0.03096 | 3190 | 562.8897 | -86.08148 | -0.01486 | 3190 | 562.9571 | -94.61546 | -0.01764 |
| 3191 | 562.1895 | -93.64262 | -0.01032 | 3191 | 563.1521 | -81.78288 | -0.02697 | 3191 | 566.3574 | -84.71369 | -0.03086 | 3191 | 563.046  | -86.14015 | -0.01486 | 3191 | 563.1559 | -94.70293 | -0.01763 |
| 3192 | 562.3337 | -93.72201 | -0.01027 | 3192 | 563.342  | -81.84031 | -0.02703 | 3192 | 566.5012 | -84.76926 | -0.03087 | 3192 | 563.2393 | -86.20232 | -0.01482 | 3192 | 563.3195 | -94.79134 | -0.01774 |
| 3193 | 562.5325 | -93.80274 | -0.01033 | 3193 | 563.4841 | -81.89796 | -0.02715 | 3193 | 566.6927 | -84.82587 | -0.03102 | 3193 | 563.3913 | -86.25673 | -0.01491 | 3193 | 563.474  | -94.88122 | -0.01778 |
| 3194 | 562.6829 | -93.87891 | -0.01041 | 3194 | 563.6574 | -81.95712 | -0.02718 | 3194 | 566.8558 | -84.88148 | -0.03103 | 3194 | 563.5562 | -86.31772 | -0.01505 | 3194 | 563.6322 | -94.96484 | -0.01773 |
| 3195 | 562.8572 | -93.9583  | -0.01042 | 3195 | 563.8214 | -82.01668 | -0.02711 | 3195 | 567.0293 | -84.93559 | -0.03093 | 3195 | 563.7141 | -86.37703 | -0.01503 | 3195 | 563.8176 | -95.05756 | -0.01771 |
| 3196 | 562.995  | -94.03469 | -0.01035 | 3196 | 564.0185 | -82.07219 | -0.02714 | 3196 | 567.1709 | -84.98679 | -0.03094 | 3196 | 563.9059 | -86.43916 | -0.01498 | 3196 | 563.987  | -95.13999 | -0.01778 |
| 3197 | 563.2041 | -94.12108 | -0.01037 | 3197 | 564.1578 | -82.12643 | -0.02732 | 3197 | 567.3552 | -85.04629 | -0.03109 | 3197 | 564.0664 | -86.49338 | -0.01502 | 3197 | 564.1406 | -95.22923 | -0.01784 |
| 3198 | 563.3594 | -94.19431 | -0.01047 | 3198 | 564.3359 | -82.18129 | -0.02739 | 3198 | 567.5266 | -85.10052 | -0.0312  | 3198 | 564.2157 | -86.55557 | -0.01514 | 3198 | 564.3043 | -95.31081 | -0.01781 |
| 3199 | 563.5226 | -94.27525 | -0.0105  | 3199 | 564.4915 | -82.23404 | -0.02734 | 3199 | 567.6995 | -85.1554  | -0.03111 | 3199 | 564.3825 | -86.6162  | -0.01512 | 3199 | 564.4775 | -95.40194 | -0.01776 |
| 3200 | 563.6746 | -94.34641 | -0.01044 | 3200 | 564.6916 | -82.28753 | -0.02732 | 3200 | 567.8405 | -85.20819 | -0.03108 | 3200 | 564.5699 | -86.68167 | -0.01512 | 3200 | 564.6621 | -95.48495 | -0.01782 |
| 3201 | 563.8674 | -94.42689 | -0.01045 | 3201 | 564.8362 | -82.34467 | -0.02741 | 3201 | 568.0217 | -85.27015 | -0.03126 | 3201 | 564.7394 | -86.73869 | -0.01516 | 3201 | 564.8087 | -95.56967 | -0.01787 |
| 3202 | 564.0316 | -94.49696 | -0.01055 | 3202 | 565.0051 | -82.38595 | -0.02747 | 3202 | 568.2025 | -85.32495 | -0.03137 | 3202 | 564.8906 | -86.80548 | -0.0153  | 3202 | 564.9722 | -95.64804 | -0.01783 |
| 3203 | 564.1907 | -94.56876 | -0.01062 | 3203 | 565.1648 | -82.43536 | -0.02737 | 3203 | 568.3655 | -85.38335 | -0.03128 | 3203 | 565.0575 | -86.86592 | -0.01539 | 3203 | 565.1395 | -95.73688 | -0.0178  |
| 3204 | 564.3469 | -94.63925 | -0.01056 | 3204 | 565.3707 | -82.48749 | -0.02724 | 3204 | 568.5212 | -85.43644 | -0.03119 | 3204 | 565.2371 | -86.93465 | -0.01532 | 3204 | 565.3333 | -95.81462 | -0.01784 |
| 3205 | 564.5237 | -94.70751 | -0.01055 | 3205 | 565.5139 | -82.53037 | -0.0273  | 3205 | 568.6854 | -85.49675 | -0.03134 | 3205 | 565.416  | -86.99244 | -0.01527 | 3205 | 565.4683 | -95.89688 | -0.01793 |
| 3206 | 564.7048 | -94.7732  | -0.01065 | 3206 | 565.6839 | -82.5834  | -0.02734 | 3206 | 568.8697 | -85.55473 | -0.03145 | 3206 | 565.5533 | -87.05555 | -0.01541 | 3206 | 565.6434 | -95.97464 | -0.01791 |
| 3207 | 564.8553 | -94.84174 | -0.01071 | 3207 | 565.8445 | -82.63107 | -0.02726 | 3207 | 569.0341 | -85.61356 | -0.03142 | 3207 | 565.7314 | -87.11746 | -0.0155  | 3207 | 565.7977 | -96.06159 | -0.01788 |
| 3208 | 565.0195 | -94.90676 | -0.01068 | 3208 | 566.0382 | -82.68192 | -0.02718 | 3208 | 569.1899 | -85.66719 | -0.03133 | 3208 | 565.9069 | -87.18271 | -0.01543 | 3208 | 565.9934 | -96.14634 | -0.01794 |
| 3209 | 565.1964 | -94.98175 | -0.01065 | 3209 | 566.195  | -82.72695 | -0.02724 | 3209 | 569.344  | -85.73004 | -0.03141 | 3209 | 566.0886 | -8        |          |      |          |           |          |

|      |          |           |          |      |          |           |          |      |          |           |          |      |          |           |          |      |          |           |          |
|------|----------|-----------|----------|------|----------|-----------|----------|------|----------|-----------|----------|------|----------|-----------|----------|------|----------|-----------|----------|
| 3271 | 575.5705 | -99.41235 | -0.01205 | 3271 | 576.5997 | -86.49199 | -0.02795 | 3271 | 579.6822 | -89.85088 | -0.03222 | 3271 | 576.4812 | -90.72777 | -0.01685 | 3271 | 576.4951 | -101.125  | -0.01908 |
| 3272 | 575.766  | -99.47754 | -0.01209 | 3272 | 576.7483 | -86.55619 | -0.02804 | 3272 | 579.8831 | -89.91874 | -0.03237 | 3272 | 576.6229 | -90.77763 | -0.01682 | 3272 | 576.6711 | -101.2039 | -0.01919 |
| 3273 | 575.9104 | -99.54536 | -0.01219 | 3273 | 576.9234 | -86.61746 | -0.02808 | 3273 | 580.0341 | -89.98544 | -0.03241 | 3273 | 576.8026 | -90.84004 | -0.01699 | 3273 | 576.8327 | -101.2836 | -0.01915 |
| 3274 | 576.0805 | -99.60926 | -0.01218 | 3274 | 577.1035 | -86.68133 | -0.02795 | 3274 | 580.2039 | -90.04958 | -0.03232 | 3274 | 576.9814 | -90.89455 | -0.01711 | 3274 | 577.0245 | -101.3645 | -0.01912 |
| 3275 | 576.2321 | -99.68015 | -0.0121  | 3275 | 577.2707 | -86.73949 | -0.02787 | 3275 | 580.3475 | -90.11594 | -0.03229 | 3275 | 577.1508 | -90.94969 | -0.01706 | 3275 | 577.165  | -101.4399 | -0.01918 |
| 3276 | 576.4454 | -99.74341 | -0.01213 | 3276 | 577.4149 | -86.80306 | -0.02796 | 3276 | 580.5516 | -90.18336 | -0.03241 | 3276 | 577.295  | -91.00002 | -0.01701 | 3276 | 577.3374 | -101.5235 | -0.01927 |
| 3277 | 576.5774 | -99.8083  | -0.01221 | 3277 | 577.5884 | -86.86568 | -0.02799 | 3277 | 580.7081 | -90.25    | -0.03252 | 3277 | 577.4705 | -91.06604 | -0.01713 | 3277 | 577.4968 | -101.603  | -0.01925 |
| 3278 | 576.7563 | -99.87339 | -0.01222 | 3278 | 577.7641 | -86.9334  | -0.02795 | 3278 | 580.8738 | -90.31828 | -0.03242 | 3278 | 577.6484 | -91.11484 | -0.01722 | 3278 | 577.6923 | -101.6854 | -0.01918 |
| 3279 | 576.9064 | -99.94023 | -0.01216 | 3279 | 577.9439 | -86.99255 | -0.0279  | 3279 | 581.0178 | -90.38331 | -0.03233 | 3279 | 577.819  | -91.17169 | -0.01715 | 3279 | 577.8434 | -101.7619 | -0.01923 |
| 3280 | 577.1117 | -100.0076 | -0.01217 | 3280 | 578.0861 | -87.05862 | -0.02802 | 3280 | 581.2129 | -90.45943 | -0.03244 | 3280 | 577.9723 | -91.22211 | -0.01707 | 3280 | 578.004  | -101.8426 | -0.01931 |
| 3281 | 577.2585 | -100.069  | -0.01225 | 3281 | 578.2568 | -87.12475 | -0.02814 | 3281 | 581.3731 | -90.52477 | -0.03255 | 3281 | 578.1324 | -91.28157 | -0.01716 | 3281 | 578.1645 | -101.9208 | -0.0193  |
| 3282 | 577.4357 | -100.135  | -0.01229 | 3282 | 578.4323 | -87.19479 | -0.02809 | 3282 | 581.5401 | -90.5945  | -0.03249 | 3282 | 578.2324 | -91.33754 | -0.01722 | 3282 | 578.2668 | -102.0004 | -0.01923 |
| 3283 | 577.5814 | -100.1945 | -0.01222 | 3283 | 578.6154 | -87.25984 | -0.02804 | 3283 | 581.6901 | -90.66265 | -0.03237 | 3283 | 578.493  | -91.39535 | -0.01718 | 3283 | 578.5139 | -102.0718 | -0.01923 |
| 3284 | 577.7869 | -100.2599 | -0.01223 | 3284 | 578.7517 | -87.32468 | -0.02813 | 3284 | 581.8708 | -90.72885 | -0.03241 | 3284 | 578.6431 | -91.44664 | -0.0171  | 3284 | 578.6699 | -102.1502 | -0.01931 |
| 3285 | 577.9376 | -100.3126 | -0.01235 | 3285 | 578.9354 | -87.39475 | -0.02823 | 3285 | 582.0474 | -90.79282 | -0.03256 | 3285 | 578.8026 | -91.50584 | -0.01719 | 3285 | 578.8403 | -102.2261 | -0.01934 |
| 3286 | 578.0997 | -100.3731 | -0.01243 | 3286 | 579.0986 | -87.46254 | -0.02818 | 3286 | 582.2067 | -90.85796 | -0.0326  | 3286 | 578.9961 | -91.56268 | -0.01728 | 3286 | 579.0237 | -102.3046 | -0.01927 |
| 3287 | 578.2562 | -100.4277 | -0.01238 | 3287 | 579.2875 | -87.52908 | -0.0281  | 3287 | 582.3661 | -90.91763 | -0.03247 | 3287 | 579.1587 | -91.61849 | -0.01729 | 3287 | 579.1918 | -102.3757 | -0.01927 |
| 3288 | 578.4487 | -100.4879 | -0.01235 | 3288 | 579.4251 | -87.5894  | -0.02813 | 3288 | 582.5398 | -90.98684 | -0.03245 | 3288 | 579.3211 | -91.66996 | -0.01721 | 3288 | 579.3402 | -102.4517 | -0.01937 |
| 3289 | 578.61   | -100.5426 | -0.01247 | 3289 | 579.5991 | -87.65645 | -0.02823 | 3289 | 582.7208 | -91.04514 | -0.03263 | 3289 | 579.4727 | -91.72432 | -0.01728 | 3289 | 579.5076 | -102.5246 | -0.01942 |
| 3290 | 578.7692 | -100.6051 | -0.01253 | 3290 | 579.7675 | -87.71977 | -0.02821 | 3290 | 582.8724 | -91.11663 | -0.03267 | 3290 | 579.6641 | -91.78024 | -0.01734 | 3290 | 579.6897 | -102.6    | -0.01941 |
| 3291 | 578.929  | -100.6582 | -0.01249 | 3291 | 579.9559 | -87.783   | -0.02813 | 3291 | 583.0319 | -91.16698 | -0.03254 | 3291 | 579.8289 | -91.83534 | -0.01732 | 3291 | 579.8564 | -102.6666 | -0.01939 |
| 3292 | 579.1152 | -100.7241 | -0.01246 | 3292 | 580.0999 | -87.83804 | -0.02814 | 3292 | 583.1962 | -91.23404 | -0.03249 | 3292 | 579.995  | -91.88256 | -0.01719 | 3292 | 580.0038 | -102.7392 | -0.01948 |
| 3293 | 579.2925 | -100.7817 | -0.01254 | 3293 | 580.2654 | -87.9016  | -0.02823 | 3293 | 583.383  | -91.29288 | -0.03266 | 3293 | 580.135  | -91.93497 | -0.0172  | 3293 | 580.1798 | -102.8112 | -0.01954 |
| 3294 | 579.4445 | -100.8424 | -0.01265 | 3294 | 580.4412 | -87.96185 | -0.02824 | 3294 | 583.5355 | -91.35651 | -0.03271 | 3294 | 580.3308 | -91.99067 | -0.01734 | 3294 | 580.3593 | -102.8862 | -0.01949 |
| 3295 | 579.6105 | -100.8972 | -0.01263 | 3295 | 580.6215 | -88.02319 | -0.02814 | 3295 | 583.7015 | -91.41438 | -0.03261 | 3295 | 580.4961 | -92.04341 | -0.0174  | 3295 | 580.5386 | -102.9541 | -0.0195  |
| 3296 | 579.7871 | -100.9607 | -0.0126  | 3296 | 580.7791 | -88.07705 | -0.02811 | 3296 | 583.8554 | -91.47926 | -0.03256 | 3296 | 580.6628 | -92.09452 | -0.01733 | 3296 | 580.6764 | -103.0273 | -0.01954 |
| 3297 | 579.969  | -101.0153 | -0.01268 | 3297 | 580.9359 | -88.13913 | -0.02821 | 3297 | 584.0569 | -91.53976 | -0.0327  | 3297 | 580.8078 | -92.1467  | -0.01733 | 3297 | 580.8505 | -103.0993 | -0.0196  |
| 3298 | 580.1143 | -101.0727 | -0.01276 | 3298 | 581.1076 | -88.19856 | -0.02821 | 3298 | 584.205  | -91.60119 | -0.03282 | 3298 | 581.004  | -92.20346 | -0.01751 | 3298 | 581.0233 | -103.1759 | -0.01957 |
| 3299 | 580.2841 | -101.1241 | -0.01275 | 3299 | 581.2894 | -88.2616  | -0.02808 | 3299 | 584.3736 | -91.66074 | -0.03276 | 3299 | 581.1661 | -92.2553  | -0.01759 | 3299 | 581.2125 | -103.2475 | -0.01953 |
| 3300 | 580.4482 | -101.1821 | -0.01277 | 3300 | 581.4552 | -88.3158  | -0.02806 | 3300 | 584.5219 | -91.72568 | -0.03266 | 3300 | 581.3477 | -92.30827 | -0.01752 | 3300 | 581.3503 | -103.314  | -0.01958 |
| 3301 | 580.6149 | -101.2355 | -0.01274 | 3301 | 581.6038 | -88.37657 | -0.02815 | 3301 | 584.6764 | -91.78667 | -0.03261 | 3301 | 581.4919 | -92.35687 | -0.01747 | 3301 | 581.5226 | -103.3864 | -0.01966 |
| 3302 | 580.7865 | -101.287  | -0.0128  | 3302 | 581.7812 | -88.43628 | -0.02819 | 3302 | 584.8688 | -91.84734 | -0.03295 | 3302 | 581.6669 | -92.41637 | -0.01759 | 3302 | 581.6912 | -103.4576 | -0.01965 |
| 3303 | 580.9566 | -101.3386 | -0.01281 | 3303 | 581.9584 | -88.49611 | -0.02811 | 3303 | 585.042  | -91.91067 | -0.03293 | 3303 | 581.8412 | -92.46886 | -0.01768 | 3303 | 581.8814 | -103.5277 | -0.0196  |
| 3304 | 581.1132 | -101.3987 | -0.01276 | 3304 | 582.1278 | -88.54748 | -0.02809 | 3304 | 585.1814 | -91.9741  | -0.0328  | 3304 | 582.0079 | -92.52323 | -0.01763 | 3304 | 582.0212 | -103.5914 | -0.01962 |
| 3305 | 581.3176 | -101.4562 | -0.01278 | 3305 | 582.2741 | -88.60344 | -0.02818 | 3305 | 585.384  | -92.03876 | -0.03291 | 3305 | 582.1532 | -92.57278 | -0.01758 | 3305 | 582.1923 | -103.6612 | -0.01971 |
| 3306 | 581.4551 | -101.5144 | -0.01288 | 3306 | 582.4511 | -88.66003 | -0.02828 | 3306 | 585.5362 | -92.09914 | -0.03302 | 3306 | 582.3323 | -92.631   | -0.01768 | 3306 | 582.3609 | -103.7297 | -0.01973 |
| 3307 | 581.6357 | -101.5739 | -0.01294 | 3307 | 582.6254 | -88.71661 | -0.0282  | 3307 | 585.7018 | -92.16483 | -0.033   | 3307 | 582.5096 | -92.67931 | -0.01779 | 3307 | 582.5493 | -103.7976 | -0.01968 |
| 3308 | 581.7873 | -101.6369 | -0.01291 | 3308 | 582.8039 | -88.76682 | -0.02812 | 3308 | 585.848  | -92.22491 | -0.03287 | 3308 | 582.6729 | -92.7327  | -0.01777 | 3308 | 582.6991 | -103.8609 | -0.0197  |
| 3309 | 581.9877 | -101.7007 | -0.0129  | 3309 | 582.9436 | -88.82138 | -0.02821 | 3309 | 586.0449 | -92.29582 | -0.03285 | 3309 | 582.8352 | -92.77801 | -0.01772 | 3309 | 582.8607 | -103.9295 | -0.01983 |
| 3310 | 582.1332 | -101.7594 | -0.01298 | 3310 | 583.1238 | -88.87918 | -0.02831 | 3310 | 586.2015 | -92.3557  | -0.03299 | 3310 | 583.0007 | -92.83267 | -0.01776 | 3310 | 583.0293 | -104.0097 | -0.01985 |
| 3311 | 582.3074 | -101.8231 | -0.01302 | 3311 | 583.2943 | -88.93914 | -0.02826 | 3311 | 586.3648 | -92.42426 | -0.033   | 3311 | 583.1887 | -92.87691 | -0.01784 | 3311 | 583.2156 | -104.0671 | -0.0198  |
| 3312 | 582.4528 | -101.8829 | -0.01297 | 3312 | 583.4763 | -88.99386 | -0.02818 | 3312 | 586.5205 | -92.48885 | -0.03291 | 3312 | 583.3461 | -92.9255  | -0.01788 | 3312 | 583.369  | -104.1287 | -0.01978 |
| 3313 | 582.6597 | -101.9471 | -0.01294 | 3313 | 583.6138 | -89.04841 | -0.02822 | 3313 | 586.6994 | -92.56026 | -0.03289 | 3313 | 583.5017 | -92.9667  | -0.01778 | 3313 | 583.528  | -104.1995 | -0.01989 |
| 3314 | 582.808  | -102.001  | -0.01302 | 3314 | 583.7895 | -89.10835 | -0.02834 | 3314 | 586.8701 | -92.62491 | -0.03303 | 3314 | 583.6629 | -93.01982 | -0.01779 | 3314 | 583.7028 | -104.2677 | -0.01993 |
| 3315 | 582.9712 | -102.0629 | -0.01308 | 3315 | 583.9621 | -89.16765 | -0.02832 | 3315 | 587.0286 | -92.69364 | -0.03308 | 3315 | 583.8606 | -93.06454 | -0.0179  | 3315 | 583.8818 | -104.3383 | -0.01988 |
| 3316 | 583.1245 | -102.1169 | -0.01305 | 3316 | 584.1486 | -89.22488 | -0.02821 | 3316 | 587.1827 | -92.75578 | -0.03295 | 3316 | 584.01   | -93.11259 | -0.01796 | 3316 | 584.0473 | -104.4022 | -0.01984 |
| 3317 | 583.3164 | -102.1807 | -0.01302 | 3317 | 584.2914 | -89.27603 | -0.02819 | 3317 | 587.3362 | -92.82752 | -0.03296 | 3317 | 584.1753 | -93.15685 | -0.01789 | 3317 | 584.1963 | -104.4706 | -0.01995 |
| 3318 | 583.483  | -102.2355 | -0.0131  | 3318 | 584.4589 | -89.3325  | -0.02834 | 3318 | 587.4845 | -92.88997 | -0.03307 | 3318 | 584.3275 | -93.20931 | -0.0179  | 3318 | 584.3727 | -104.5387 | -0.02002 |
| 3319 | 583.6424 | -102.3013 | -0.01316 | 3319 | 584.6392 | -89.38984 | -0.02838 | 3319 | 587.6401 | -92.95695 | -0.03315 | 3319 | 584.5285 | -93.26233 | -0.01804 | 3319 | 584.5491 | -104.6067 | -0.01996 |
| 3320 | 583.8013 | -102.3586 | -0.01313 | 3320 | 584.8203 | -89.44589 | -0.02827 | 3320 | 587.8516 | -93.01696 | -0.03309 | 3320 | 584.681  | -93.31497 | -0.01816 | 3320 | 584.7261 | -104.6675 | -0.01993 |
| 3321 | 583.9854 | -102.4284 | -0.01309 | 3321 | 584.965  | -89.4943  | -0.02825 | 3321 | 588.0101 | -93.07862 | -0.033   | 3321 | 584.848  | -93.36259 | -0.01808 | 3321 | 584.8674 | -104.7332 | -0.02003 |
| 3322 | 584.1614 | -102.4884 | -0.01316 | 3322 | 585.1304 | -89.55203 | -0.02837 | 3322 | 588.2017 | -93.12282 | -0.0331  | 3322 | 584.9923 | -93.41753 | -0.01804 | 332  |          |           |          |

|      |          |           |          |      |          |           |          |      |          |           |          |      |          |           |          |      |          |           |          |
|------|----------|-----------|----------|------|----------|-----------|----------|------|----------|-----------|----------|------|----------|-----------|----------|------|----------|-----------|----------|
| 3384 | 594.5638 | -105.9392 | -0.01477 | 3384 | 595.5302 | -92.99382 | -0.02894 | 3384 | 598.5745 | -96.6524  | -0.03334 | 3384 | 595.3829 | -96.65213 | -0.01917 | 3384 | 595.4581 | -108.6245 | -0.02151 |
| 3385 | 594.7044 | -105.9854 | -0.01487 | 3385 | 595.7165 | -93.0463  | -0.02906 | 3385 | 598.713  | -96.70512 | -0.03345 | 3385 | 595.5851 | -96.70483 | -0.01913 | 3385 | 595.6221 | -108.6814 | -0.02156 |
| 3386 | 594.8798 | -106.0285 | -0.01489 | 3386 | 595.884  | -93.09714 | -0.02904 | 3386 | 598.8854 | -96.75891 | -0.0335  | 3386 | 595.7299 | -96.75362 | -0.01924 | 3386 | 595.8017 | -108.7384 | -0.02154 |
| 3387 | 595.0422 | -106.078  | -0.01486 | 3387 | 596.0499 | -93.14075 | -0.0289  | 3387 | 599.0389 | -96.81325 | -0.03337 | 3387 | 595.9059 | -96.80782 | -0.01928 | 3387 | 595.9411 | -108.7926 | -0.02155 |
| 3388 | 595.2372 | -106.1184 | -0.01486 | 3388 | 596.1972 | -93.1916  | -0.02891 | 3388 | 599.2429 | -96.86828 | -0.03331 | 3388 | 596.0458 | -96.8598  | -0.0192  | 3388 | 596.1202 | -108.859  | -0.02163 |
| 3389 | 595.3759 | -106.1621 | -0.01498 | 3389 | 596.3933 | -93.24243 | -0.02903 | 3389 | 599.3825 | -96.91641 | -0.03346 | 3389 | 596.2505 | -96.91774 | -0.01921 | 3389 | 596.2967 | -108.9159 | -0.0217  |
| 3390 | 595.5487 | -106.204  | -0.01503 | 3390 | 596.5566 | -93.29285 | -0.02904 | 3390 | 599.558  | -96.97171 | -0.0335  | 3390 | 596.3998 | -96.96782 | -0.01933 | 3390 | 596.4684 | -108.975  | -0.02166 |
| 3391 | 595.7092 | -106.2513 | -0.01498 | 3391 | 596.724  | -93.338   | -0.02891 | 3391 | 599.7072 | -97.02048 | -0.03337 | 3391 | 596.5641 | -97.02665 | -0.01939 | 3391 | 596.6165 | -109.0303 | -0.02163 |
| 3392 | 595.9125 | -106.2966 | -0.01496 | 3392 | 596.8686 | -93.38878 | -0.02891 | 3392 | 599.9708 | -97.0754  | -0.03342 | 3392 | 596.7219 | -97.08108 | -0.01934 | 3392 | 596.7902 | -109.0936 | -0.02172 |
| 3393 | 596.0488 | -106.3379 | -0.01506 | 3393 | 597.061  | -93.44177 | -0.02903 | 3393 | 600.0603 | -97.12513 | -0.03346 | 3393 | 596.9158 | -97.13807 | -0.0193  | 3393 | 596.9697 | -109.1504 | -0.02178 |
| 3394 | 596.2255 | -106.3844 | -0.01513 | 3394 | 597.2269 | -93.49458 | -0.02904 | 3394 | 600.2203 | -97.17537 | -0.03354 | 3394 | 597.0776 | -97.1897  | -0.01941 | 3394 | 597.1367 | -109.2101 | -0.02175 |
| 3395 | 596.3821 | -106.4306 | -0.01509 | 3395 | 597.4045 | -93.54649 | -0.02894 | 3395 | 600.3788 | -97.22522 | -0.03344 | 3395 | 597.239  | -97.24871 | -0.0195  | 3395 | 597.2887 | -109.2655 | -0.02169 |
| 3396 | 596.5816 | -106.4794 | -0.01506 | 3396 | 597.5481 | -93.59422 | -0.02891 | 3396 | 600.5768 | -97.28447 | -0.03339 | 3396 | 597.394  | -97.29849 | -0.01942 | 3396 | 597.4499 | -109.3288 | -0.02178 |
| 3397 | 596.7278 | -106.5195 | -0.01516 | 3397 | 597.7321 | -93.65126 | -0.02904 | 3397 | 600.7351 | -97.33339 | -0.0335  | 3397 | 597.5853 | -97.35654 | -0.01938 | 3397 | 597.6404 | -109.3897 | -0.02186 |
| 3398 | 596.895  | -106.5657 | -0.01524 | 3398 | 597.9047 | -93.70206 | -0.02907 | 3398 | 600.8906 | -97.39126 | -0.03361 | 3398 | 597.7537 | -97.40375 | -0.01944 | 3398 | 597.8034 | -109.4504 | -0.02185 |
| 3399 | 597.0497 | -106.6085 | -0.01521 | 3399 | 598.0757 | -93.75266 | -0.029   | 3399 | 601.0541 | -97.44455 | -0.03348 | 3399 | 597.9035 | -97.45922 | -0.01956 | 3399 | 597.9587 | -109.5075 | -0.02177 |
| 3400 | 597.2508 | -106.6539 | -0.0152  | 3400 | 598.2237 | -93.79948 | -0.02897 | 3400 | 601.2335 | -97.50612 | -0.03355 | 3400 | 598.0695 | -97.50681 | -0.01954 | 3400 | 598.1166 | -109.5714 | -0.02182 |
| 3401 | 597.4024 | -106.6887 | -0.01528 | 3401 | 598.4071 | -93.85471 | -0.0291  | 3401 | 601.4111 | -97.56018 | -0.03347 | 3401 | 598.2499 | -97.56379 | -0.01944 | 3401 | 598.3078 | -109.6314 | -0.02188 |
| 3402 | 597.564  | -106.7332 | -0.01536 | 3402 | 598.5838 | -93.90337 | -0.02916 | 3402 | 601.5575 | -97.61946 | -0.03358 | 3402 | 598.4282 | -97.60997 | -0.01944 | 3402 | 598.4717 | -109.6939 | -0.02187 |
| 3403 | 597.7295 | -106.7711 | -0.01539 | 3403 | 598.7504 | -93.95125 | -0.02911 | 3403 | 601.7222 | -97.67475 | -0.03355 | 3403 | 598.5673 | -97.66266 | -0.01956 | 3403 | 598.6385 | -109.75   | -0.02179 |
| 3404 | 597.9241 | -106.815  | -0.01533 | 3404 | 598.9031 | -93.99611 | -0.02906 | 3404 | 601.8937 | -97.73856 | -0.03343 | 3404 | 598.7399 | -97.71075 | -0.01959 | 3404 | 598.7895 | -109.809  | -0.02182 |
| 3405 | 598.087  | -106.8505 | -0.01538 | 3405 | 599.07   | -94.04903 | -0.02913 | 3405 | 602.0856 | -97.79238 | -0.0335  | 3405 | 598.909  | -97.76877 | -0.01952 | 3405 | 598.981  | -109.8702 | -0.02191 |
| 3406 | 598.2409 | -106.8934 | -0.01546 | 3406 | 599.2601 | -94.09776 | -0.02919 | 3406 | 602.222  | -97.85022 | -0.03362 | 3406 | 599.1022 | -97.81691 | -0.0195  | 3406 | 599.1462 | -109.9308 | -0.02195 |
| 3407 | 598.4077 | -106.9277 | -0.01546 | 3407 | 599.4253 | -94.14616 | -0.02914 | 3407 | 602.3699 | -97.90549 | -0.03362 | 3407 | 599.2424 | -97.86982 | -0.01964 | 3407 | 599.3128 | -109.9827 | -0.0219  |
| 3408 | 598.5889 | -106.9719 | -0.01545 | 3408 | 599.5772 | -94.19022 | -0.02906 | 3408 | 602.5166 | -97.96229 | -0.03346 | 3408 | 599.418  | -97.91791 | -0.01973 | 3408 | 599.4567 | -110.0406 | -0.02192 |
| 3409 | 598.772  | -107.0062 | -0.01551 | 3409 | 599.7394 | -94.24546 | -0.0291  | 3409 | 602.7527 | -98.02185 | -0.03344 | 3409 | 599.5822 | -97.97253 | -0.01966 | 3409 | 599.6541 | -110.0983 | -0.02201 |
| 3410 | 598.9122 | -107.0423 | -0.01563 | 3410 | 599.9363 | -94.29668 | -0.0292  | 3410 | 602.8961 | -98.08076 | -0.03358 | 3410 | 599.7756 | -98.01962 | -0.01961 | 3410 | 599.8141 | -110.1546 | -0.02205 |
| 3411 | 599.0844 | -107.0746 | -0.01575 | 3411 | 600.0936 | -94.34842 | -0.0292  | 3411 | 603.0725 | -98.13805 | -0.03359 | 3411 | 599.9106 | -98.06582 | -0.0197  | 3411 | 599.9859 | -110.2039 | -0.02202 |
| 3412 | 599.2623 | -107.1148 | -0.01582 | 3412 | 600.2564 | -94.39774 | -0.02909 | 3412 | 603.2219 | -98.20177 | -0.03343 | 3412 | 600.0922 | -98.11394 | -0.01979 | 3412 | 600.1295 | -110.2548 | -0.022   |
| 3413 | 599.4432 | -107.1434 | -0.01594 | 3413 | 600.4128 | -94.45102 | -0.02916 | 3413 | 603.4252 | -98.26221 | -0.03341 | 3413 | 600.249  | -98.16341 | -0.01972 | 3413 | 600.3237 | -110.3095 | -0.02211 |
| 3414 | 599.5886 | -107.1722 | -0.01612 | 3414 | 600.6044 | -94.50391 | -0.02925 | 3414 | 603.5642 | -98.32009 | -0.03355 | 3414 | 600.448  | -98.21083 | -0.01967 | 3414 | 600.4829 | -110.3593 | -0.02215 |
| 3415 | 599.7661 | -107.1962 | -0.01622 | 3415 | 600.7653 | -94.55596 | -0.02923 | 3415 | 603.7362 | -98.38126 | -0.03363 | 3415 | 600.587  | -98.25427 | -0.01973 | 3415 | 600.6619 | -110.4089 | -0.02212 |
| 3416 | 599.9313 | -107.2232 | -0.01624 | 3416 | 600.9327 | -94.60265 | -0.02915 | 3416 | 603.904  | -98.44066 | -0.03354 | 3416 | 600.7625 | -98.30256 | -0.01982 | 3416 | 600.8063 | -110.4541 | -0.02206 |
| 3417 | 600.1299 | -107.242  | -0.01625 | 3417 | 601.0762 | -94.65348 | -0.02916 | 3417 | 604.0941 | -98.50247 | -0.03351 | 3417 | 600.9222 | -98.35098 | -0.01977 | 3417 | 600.9895 | -110.5079 | -0.02215 |
| 3418 | 600.2447 | -107.2579 | -0.01633 | 3418 | 601.2744 | -94.70911 | -0.02928 | 3418 | 604.2345 | -98.55631 | -0.03366 | 3418 | 601.122  | -98.4002  | -0.0197  | 3418 | 601.1641 | -110.5541 | -0.02222 |
| 3419 | 600.4625 | -107.273  | -0.01637 | 3419 | 601.4401 | -94.76202 | -0.02932 | 3419 | 604.4047 | -98.61857 | -0.03377 | 3419 | 601.2658 | -98.43958 | -0.01976 | 3419 | 601.3377 | -110.6047 | -0.02216 |
| 3420 | 600.6024 | -107.2908 | -0.01634 | 3420 | 601.6051 | -94.8118  | -0.02924 | 3420 | 604.5595 | -98.6747  | -0.03371 | 3420 | 601.4334 | -98.4891  | -0.01985 | 3420 | 601.484  | -110.6476 | -0.02213 |
| 3421 | 600.8045 | -107.3062 | -0.01632 | 3421 | 601.7501 | -94.86531 | -0.02922 | 3421 | 604.7541 | -98.7358  | -0.03365 | 3421 | 601.5978 | -98.53522 | -0.01988 | 3421 | 601.661  | -110.7013 | -0.02221 |
| 3422 | 600.9196 | -107.3165 | -0.01642 | 3422 | 601.9448 | -94.92358 | -0.02934 | 3422 | 604.9132 | -98.78972 | -0.03373 | 3422 | 601.7899 | -98.58473 | -0.0197  | 3422 | 601.8412 | -110.7444 | -0.02232 |
| 3423 | 601.1138 | -107.3325 | -0.01651 | 3423 | 602.1033 | -94.97936 | -0.02941 | 3423 | 605.0723 | -98.8499  | -0.03381 | 3423 | 601.9445 | -98.62772 | -0.01973 | 3423 | 602.0037 | -110.7905 | -0.0223  |
| 3424 | 601.2749 | -107.3475 | -0.01647 | 3424 | 602.2808 | -95.035   | -0.0293  | 3424 | 605.2315 | -98.90689 | -0.03375 | 3424 | 602.1047 | -98.67882 | -0.01985 | 3424 | 602.1633 | -110.8318 | -0.02225 |
| 3425 | 601.4702 | -107.3656 | -0.01646 | 3425 | 602.4233 | -95.08392 | -0.02925 | 3425 | 605.4263 | -98.96965 | -0.03366 | 3425 | 602.2698 | -98.72498 | -0.01983 | 3425 | 602.3307 | -110.8791 | -0.02229 |
| 3426 | 601.6149 | -107.3792 | -0.01654 | 3426 | 602.6115 | -95.144   | -0.02932 | 3426 | 605.5839 | -99.02058 | -0.03373 | 3426 | 602.4561 | -98.77727 | -0.01976 | 3426 | 602.5172 | -110.9183 | -0.02238 |
| 3427 | 601.7934 | -107.4008 | -0.01662 | 3427 | 602.7815 | -95.19467 | -0.02938 | 3427 | 605.7387 | -99.08334 | -0.03381 | 3427 | 602.6212 | -98.81957 | -0.01977 | 3427 | 602.6852 | -110.9613 | -0.02239 |
| 3428 | 601.9487 | -107.4204 | -0.01663 | 3428 | 602.9515 | -95.25122 | -0.02931 | 3428 | 605.9049 | -99.13818 | -0.03378 | 3428 | 602.7709 | -98.86704 | -0.01991 | 3428 | 602.8408 | -110.9942 | -0.02231 |
| 3429 | 602.1462 | -107.445  | -0.0166  | 3429 | 603.1011 | -95.30115 | -0.0292  | 3429 | 606.0815 | -99.2003  | -0.03366 | 3429 | 602.9437 | -98.91446 | -0.01997 | 3429 | 602.9955 | -111.0366 | -0.02234 |
| 3430 | 602.3028 | -107.4619 | -0.01666 | 3430 | 603.2804 | -95.36159 | -0.02926 | 3430 | 606.2629 | -99.25665 | -0.0337  | 3430 | 603.1292 | -98.96317 | -0.0199  | 3430 | 603.1943 | -111.0747 | -0.02244 |
| 3431 | 602.4601 | -107.4889 | -0.01674 | 3431 | 603.4584 | -95.4154  | -0.02936 | 3431 | 606.4111 | -99.31514 | -0.03381 | 3431 | 603.299  | -99.00355 | -0.01987 | 3431 | 603.3492 | -111.1119 | -0.02249 |
| 3432 | 602.6262 | -107.5102 | -0.01675 | 3432 | 603.6192 | -95.47235 | -0.02934 | 3432 | 606.5798 | -99.37414 | -0.03382 | 3432 | 603.4474 | -99.05048 | -0.02002 | 3432 | 603.5114 | -111.1488 | -0.02237 |
| 3433 | 602.8139 | -107.5387 | -0.01669 | 3433 | 603.7728 | -95.524   | -0.02926 | 3433 | 606.7519 | -99.43494 | -0.03373 | 3433 | 603.6195 | -99.09549 | -0.02008 | 3433 | 603.6663 | -111.1906 | -0.02238 |
| 3434 | 602.9771 | -107.5577 | -0.01674 | 3434 | 603.9375 | -95.58482 | -0.02932 | 3434 | 606.9295 | -99.49136 | -0.03377 | 3434 | 603.794  | -99.14673 | -0.02001 | 3434 | 603.8669 | -111.2326 | -0.02246 |
| 3435 | 603.1328 | -107.5853 | -0.01682 | 3435 | 604.1271 | -95.64018 | -0.02942 | 3435 | 607.0746 | -99.55039 | -0.03392 | 3435 | 603.9763 | -99.1882  | -0.01996 | 343  |          |           |          |

|      |          |           |          |      |          |           |          |      |          |           |          |      |          |           |          |      |          |           |          |
|------|----------|-----------|----------|------|----------|-----------|----------|------|----------|-----------|----------|------|----------|-----------|----------|------|----------|-----------|----------|
| 3497 | 613.6195 | -108.2425 | -0.01847 | 3497 | 614.5488 | -98.88742 | -0.03012 | 3497 | 617.5139 | -102.7574 | -0.03447 | 3497 | 614.3996 | -102.1995 | -0.02053 | 3497 | 614.4653 | -113.5489 | -0.02382 |
| 3498 | 613.7938 | -108.2292 | -0.01855 | 3498 | 614.6919 | -98.93565 | -0.03019 | 3498 | 617.6913 | -102.8007 | -0.03458 | 3498 | 614.5405 | -102.2405 | -0.02051 | 3498 | 614.6393 | -113.5714 | -0.02381 |
| 3499 | 613.973  | -108.2225 | -0.01854 | 3499 | 614.8657 | -98.97955 | -0.03011 | 3499 | 617.8501 | -102.8456 | -0.03452 | 3499 | 614.7273 | -102.2897 | -0.02063 | 3499 | 614.7845 | -113.5949 | -0.02376 |
| 3500 | 614.1637 | -108.2026 | -0.01855 | 3500 | 615.0155 | -99.02957 | -0.03003 | 3500 | 618.0431 | -102.8953 | -0.03439 | 3500 | 614.8952 | -102.3321 | -0.02072 | 3500 | 614.9954 | -113.6243 | -0.02378 |
| 3501 | 614.3033 | -108.188  | -0.01865 | 3501 | 615.2195 | -99.07357 | -0.03012 | 3501 | 618.1917 | -102.9385 | -0.03444 | 3501 | 615.0725 | -102.3755 | -0.02062 | 3501 | 615.1439 | -113.6449 | -0.02387 |
| 3502 | 614.4866 | -108.1705 | -0.01871 | 3502 | 615.3691 | -99.11847 | -0.03016 | 3502 | 618.356  | -102.9889 | -0.03458 | 3502 | 615.2195 | -102.4141 | -0.02057 | 3502 | 615.3148 | -113.6731 | -0.02389 |
| 3503 | 614.6534 | -108.1563 | -0.01866 | 3503 | 615.5443 | -99.16173 | -0.03011 | 3503 | 618.5302 | -103.0391 | -0.03463 | 3503 | 615.3938 | -102.4618 | -0.02068 | 3503 | 615.4621 | -113.6931 | -0.02384 |
| 3504 | 614.8451 | -108.1374 | -0.01859 | 3504 | 615.6852 | -99.20837 | -0.03001 | 3504 | 618.719  | -103.0917 | -0.0345  | 3504 | 615.5796 | -102.5017 | -0.02077 | 3504 | 615.6595 | -113.7255 | -0.02384 |
| 3505 | 614.9841 | -108.1171 | -0.01865 | 3505 | 615.8958 | -99.25789 | -0.03007 | 3505 | 618.873  | -103.1382 | -0.03451 | 3505 | 615.7501 | -102.544  | -0.02073 | 3505 | 615.8235 | -113.7478 | -0.02393 |
| 3506 | 615.1594 | -108.1023 | -0.01869 | 3506 | 616.0497 | -99.30362 | -0.03019 | 3506 | 619.0311 | -103.1827 | -0.03466 | 3506 | 615.9004 | -102.5817 | -0.02062 | 3506 | 615.9871 | -113.7779 | -0.02395 |
| 3507 | 615.3283 | -108.0887 | -0.01868 | 3507 | 616.2183 | -99.3544  | -0.03017 | 3507 | 619.2028 | -103.2419 | -0.0347  | 3507 | 616.0668 | -102.6254 | -0.02074 | 3507 | 616.1397 | -113.8008 | -0.0239  |
| 3508 | 615.525  | -108.0762 | -0.01866 | 3508 | 616.3632 | -99.39968 | -0.03006 | 3508 | 619.3858 | -103.2972 | -0.03461 | 3508 | 616.2557 | -102.6658 | -0.02083 | 3508 | 616.329  | -113.8342 | -0.02386 |
| 3509 | 615.6652 | -108.0588 | -0.01874 | 3509 | 616.5681 | -99.45609 | -0.0301  | 3509 | 619.5523 | -103.3459 | -0.03458 | 3509 | 616.417  | -102.7064 | -0.02084 | 3509 | 616.5007 | -113.8589 | -0.02395 |
| 3510 | 615.838  | -108.0516 | -0.01885 | 3510 | 616.7221 | -99.50133 | -0.03022 | 3510 | 619.7034 | -103.4027 | -0.03469 | 3510 | 616.5774 | -102.7435 | -0.02076 | 3510 | 616.6546 | -113.8893 | -0.02402 |
| 3511 | 616.0092 | -108.0404 | -0.01885 | 3511 | 616.8905 | -99.55246 | -0.0302  | 3511 | 619.8756 | -103.4562 | -0.03477 | 3511 | 616.7348 | -102.7866 | -0.02085 | 3511 | 616.8186 | -113.913  | -0.02398 |
| 3512 | 616.2005 | -108.0318 | -0.01878 | 3512 | 617.0376 | -99.59805 | -0.03015 | 3512 | 620.0576 | -103.5157 | -0.03468 | 3512 | 616.926  | -102.8289 | -0.02097 | 3512 | 616.9981 | -113.946  | -0.02395 |
| 3513 | 616.3562 | -108.0152 | -0.01886 | 3513 | 617.2286 | -99.65344 | -0.03013 | 3513 | 620.2274 | -103.5648 | -0.03462 | 3513 | 617.0895 | -102.8724 | -0.02098 | 3513 | 617.1779 | -113.971  | -0.02403 |
| 3514 | 616.5236 | -108.0058 | -0.01891 | 3514 | 617.3976 | -99.69994 | -0.03025 | 3514 | 620.372  | -103.6233 | -0.03473 | 3514 | 617.252  | -102.9128 | -0.02093 | 3514 | 617.3331 | -114.01   | -0.0241  |
| 3515 | 616.6904 | -107.9915 | -0.01889 | 3515 | 617.5554 | -99.75127 | -0.03029 | 3515 | 620.5321 | -103.6781 | -0.03481 | 3515 | 617.4038 | -102.9581 | -0.02094 | 3515 | 617.4981 | -114.0254 | -0.02408 |
| 3516 | 616.8842 | -107.9791 | -0.01888 | 3516 | 617.7147 | -99.79964 | -0.03021 | 3516 | 620.7277 | -103.7363 | -0.03475 | 3516 | 617.6042 | -103.0061 | -0.02103 | 3516 | 617.6635 | -114.0576 | -0.02405 |
| 3517 | 617.0452 | -107.9554 | -0.01892 | 3517 | 617.8975 | -99.86009 | -0.03019 | 3517 | 620.9085 | -103.7843 | -0.03469 | 3517 | 617.7639 | -103.0517 | -0.02101 | 3517 | 617.8597 | -114.0823 | -0.02415 |
| 3518 | 617.1964 | -107.9383 | -0.01904 | 3518 | 618.07   | -99.9095  | -0.03031 | 3518 | 621.0501 | -103.8362 | -0.0348  | 3518 | 617.9294 | -103.0935 | -0.0209  | 3518 | 618.0024 | -114.1092 | -0.02422 |
| 3519 | 617.3706 | -107.918  | -0.01909 | 3519 | 618.2318 | -99.96574 | -0.03035 | 3519 | 621.2252 | -103.8863 | -0.03498 | 3519 | 618.0787 | -103.1403 | -0.02088 | 3519 | 618.1722 | -114.1332 | -0.02418 |
| 3520 | 617.5566 | -107.9009 | -0.01905 | 3520 | 618.3958 | -100.0155 | -0.03027 | 3520 | 621.3963 | -103.9384 | -0.03492 | 3520 | 618.2713 | -103.1858 | -0.02097 | 3520 | 618.3372 | -114.1632 | -0.02415 |
| 3521 | 617.7235 | -107.8748 | -0.0191  | 3521 | 618.5644 | -100.0768 | -0.03019 | 3521 | 621.5886 | -103.9866 | -0.03483 | 3521 | 618.4315 | -103.2317 | -0.02098 | 3521 | 618.5347 | -114.185  | -0.02418 |
| 3522 | 617.8748 | -107.8538 | -0.0192  | 3522 | 618.7547 | -100.1273 | -0.03032 | 3522 | 621.7213 | -104.0321 | -0.03487 | 3522 | 618.6052 | -103.2728 | -0.02088 | 3522 | 618.6785 | -114.2091 | -0.02424 |
| 3523 | 618.0551 | -107.8323 | -0.01928 | 3523 | 618.9045 | -100.1814 | -0.03032 | 3523 | 621.902  | -104.0826 | -0.03495 | 3523 | 618.7429 | -103.3166 | -0.02083 | 3523 | 618.8587 | -114.2304 | -0.02421 |
| 3524 | 618.2323 | -107.8146 | -0.01923 | 3524 | 619.0723 | -100.2298 | -0.03024 | 3524 | 622.0733 | -104.1371 | -0.03489 | 3524 | 618.9396 | -103.3666 | -0.02092 | 3524 | 619.0103 | -114.2559 | -0.02415 |
| 3525 | 618.4138 | -107.7892 | -0.01922 | 3525 | 619.2313 | -100.2853 | -0.0302  | 3525 | 622.2573 | -104.1901 | -0.03473 | 3525 | 619.1041 | -103.413  | -0.02101 | 3525 | 619.2178 | -114.2787 | -0.02416 |
| 3526 | 618.59   | -107.7666 | -0.0193  | 3526 | 619.4284 | -100.3344 | -0.03029 | 3526 | 622.3993 | -104.2364 | -0.03477 | 3526 | 619.2728 | -103.4607 | -0.02091 | 3526 | 619.3633 | -114.2966 | -0.02422 |
| 3527 | 618.7319 | -107.7429 | -0.01936 | 3527 | 619.5703 | -100.3844 | -0.03041 | 3527 | 622.5712 | -104.2863 | -0.03492 | 3527 | 619.4207 | -103.5051 | -0.02086 | 3527 | 619.5361 | -114.3172 | -0.02421 |
| 3528 | 618.9108 | -107.7266 | -0.01929 | 3528 | 619.7457 | -100.4331 | -0.03033 | 3528 | 622.7421 | -104.3402 | -0.0349  | 3528 | 619.6107 | -103.559  | -0.02098 | 3528 | 619.6833 | -114.3351 | -0.02417 |
| 3529 | 619.0974 | -107.6987 | -0.01926 | 3529 | 619.8998 | -100.4863 | -0.03026 | 3529 | 622.9277 | -104.3908 | -0.03477 | 3529 | 619.7783 | -103.6035 | -0.02107 | 3529 | 619.8888 | -114.3577 | -0.02418 |
| 3530 | 619.2383 | -107.6722 | -0.01932 | 3530 | 620.1011 | -100.5366 | -0.03035 | 3530 | 623.0784 | -104.4354 | -0.03478 | 3530 | 619.9504 | -103.6512 | -0.02099 | 3530 | 620.0352 | -114.3707 | -0.02428 |
| 3531 | 619.4177 | -107.6471 | -0.0194  | 3531 | 620.2472 | -100.5873 | -0.03035 | 3531 | 623.2374 | -104.4845 | -0.03489 | 3531 | 620.0967 | -103.6914 | -0.02092 | 3531 | 620.208  | -114.3928 | -0.02433 |
| 3532 | 619.5865 | -107.6211 | -0.01939 | 3532 | 620.4247 | -100.6365 | -0.03048 | 3532 | 623.4136 | -104.5349 | -0.03493 | 3532 | 620.2724 | -103.7426 | -0.02098 | 3532 | 620.3576 | -114.4079 | -0.02433 |
| 3533 | 619.779  | -107.5938 | -0.01937 | 3533 | 620.5632 | -100.6913 | -0.03037 | 3533 | 623.6012 | -104.5842 | -0.03484 | 3533 | 620.4559 | -103.7847 | -0.0211  | 3533 | 620.5533 | -114.4309 | -0.02428 |
| 3534 | 619.9206 | -107.5665 | -0.01945 | 3534 | 620.78   | -100.744  | -0.03041 | 3534 | 623.7543 | -104.634  | -0.03478 | 3534 | 620.6177 | -103.8305 | -0.02108 | 3534 | 620.7191 | -114.4447 | -0.02437 |
| 3535 | 620.0939 | -107.5287 | -0.01955 | 3535 | 620.9243 | -100.7899 | -0.03055 | 3535 | 623.9137 | -104.69   | -0.03489 | 3535 | 620.7691 | -103.871  | -0.021   | 3535 | 620.8825 | -114.4642 | -0.02443 |
| 3536 | 620.2659 | -107.4968 | -0.01954 | 3536 | 621.093  | -100.8431 | -0.03053 | 3536 | 624.0902 | -104.7441 | -0.03497 | 3536 | 620.9381 | -103.9214 | -0.02104 | 3536 | 621.0378 | -114.4784 | -0.0244  |
| 3537 | 620.4661 | -107.4667 | -0.01951 | 3537 | 621.2407 | -100.89   | -0.03043 | 3537 | 624.2665 | -104.8013 | -0.03488 | 3537 | 621.1285 | -103.9643 | -0.02118 | 3537 | 621.2319 | -114.5022 | -0.02434 |
| 3538 | 620.6075 | -107.4276 | -0.01955 | 3538 | 621.4467 | -100.9445 | -0.03041 | 3538 | 624.4334 | -104.8541 | -0.03482 | 3538 | 621.2861 | -104.0104 | -0.02119 | 3538 | 621.4016 | -114.515  | -0.02443 |
| 3539 | 620.7831 | -107.397  | -0.01965 | 3539 | 621.5969 | -100.9885 | -0.03053 | 3539 | 624.5825 | -104.916  | -0.03493 | 3539 | 621.4518 | -104.0489 | -0.02111 | 3539 | 621.5515 | -114.5356 | -0.02447 |
| 3540 | 620.9536 | -107.3636 | -0.01966 | 3540 | 621.7676 | -101.0394 | -0.03054 | 3540 | 624.7598 | -104.9633 | -0.03504 | 3540 | 621.6112 | -104.0946 | -0.02112 | 3540 | 621.7189 | -114.5498 | -0.02444 |
| 3541 | 621.1362 | -107.3332 | -0.01961 | 3541 | 621.9204 | -101.0828 | -0.03043 | 3541 | 624.9421 | -105.0286 | -0.03499 | 3541 | 621.8034 | -104.134  | -0.02127 | 3541 | 621.8956 | -114.5736 | -0.02438 |
| 3542 | 621.2925 | -107.2922 | -0.01961 | 3542 | 622.1138 | -101.1382 | -0.03039 | 3542 | 625.1135 | -105.0754 | -0.03486 | 3542 | 621.9591 | -104.1752 | -0.0213  | 3542 | 622.0767 | -114.5884 | -0.02443 |
| 3543 | 621.4539 | -107.2584 | -0.01969 | 3543 | 622.2827 | -101.1819 | -0.03051 | 3543 | 625.2557 | -105.1291 | -0.03497 | 3543 | 622.1266 | -104.2069 | -0.0212  | 3543 | 622.2253 | -114.606  | -0.0245  |
| 3544 | 621.6251 | -107.2252 | -0.0197  | 3544 | 622.4371 | -101.2298 | -0.03057 | 3544 | 625.3945 | -105.1822 | -0.03508 | 3544 | 622.2774 | -104.2463 | -0.02115 | 3544 | 622.3934 | -114.6187 | -0.02448 |
| 3545 | 621.8142 | -107.194  | -0.01963 | 3545 | 622.595  | -101.2712 | -0.03049 | 3545 | 625.5498 | -105.2342 | -0.03502 | 3545 | 622.4833 | -104.2832 | -0.02127 | 3545 | 622.557  | -114.6404 | -0.02445 |
| 3546 | 621.981  | -107.1544 | -0.01961 | 3546 | 622.7832 | -101.3233 | -0.03047 | 3546 | 625.7954 | -105.28   | -0.03486 | 3546 | 622.6327 | -104.317  | -0.02133 | 3546 | 622.7537 | -114.6544 | -0.02447 |
| 3547 | 622.1321 | -107.1218 | -0.0197  | 3547 | 622.9584 | -101.3642 | -0.03062 | 3547 | 625.9374 | -105.3266 | -0.0349  | 3547 | 622.7997 | -104.3479 | -0.0212  | 3547 | 622.8986 | -114.6734 | -0.02456 |
| 3548 | 622.311  | -107.0876 | -0.01976 | 3548 | 623.1093 | -101.4126 | -0.03069 | 3548 | 626.1111 | -105.3743 | -0.03505 | 3548 | 622.9514 | -104.3846 | -0.021   |      |          |           |          |

|      |          |           |          |      |          |           |          |      |          |           |          |      |          |           |          |      |          |           |          |
|------|----------|-----------|----------|------|----------|-----------|----------|------|----------|-----------|----------|------|----------|-----------|----------|------|----------|-----------|----------|
| 3610 | 632.8726 | -105.5471 | -0.02139 | 3610 | 633.5524 | -104.5256 | -0.03134 | 3610 | 636.5659 | -108.1295 | -0.03563 | 3610 | 633.4403 | -106.5704 | -0.02159 | 3610 | 633.5792 | -115.2799 | -0.02526 |
| 3611 | 633.0459 | -105.5491 | -0.02138 | 3611 | 633.7253 | -104.5742 | -0.03137 | 3611 | 636.7536 | -108.1708 | -0.03568 | 3611 | 633.6481 | -106.6103 | -0.02155 | 3611 | 633.7448 | -115.2932 | -0.02523 |
| 3612 | 633.2283 | -105.5488 | -0.02131 | 3612 | 633.8894 | -104.6317 | -0.03124 | 3612 | 636.9164 | -108.2137 | -0.03558 | 3612 | 633.7949 | -106.6415 | -0.02169 | 3612 | 633.9412 | -115.3077 | -0.0252  |
| 3613 | 633.3662 | -105.5555 | -0.02137 | 3613 | 634.0877 | -104.6798 | -0.03124 | 3613 | 637.0753 | -108.2528 | -0.03549 | 3613 | 633.9639 | -106.681  | -0.02175 | 3613 | 634.0813 | -115.3145 | -0.02526 |
| 3614 | 633.5507 | -105.5624 | -0.02145 | 3614 | 634.2204 | -104.7268 | -0.03137 | 3614 | 637.2346 | -108.2983 | -0.0356  | 3614 | 634.1205 | -106.7169 | -0.02168 | 3614 | 634.2551 | -115.3283 | -0.02534 |
| 3615 | 633.7258 | -105.5714 | -0.02144 | 3615 | 634.4011 | -104.7748 | -0.03143 | 3615 | 637.42   | -108.3451 | -0.03572 | 3615 | 634.2209 | -106.7576 | -0.0216  | 3615 | 634.4231 | -115.3423 | -0.02529 |
| 3616 | 633.9122 | -105.5787 | -0.02137 | 3616 | 634.5623 | -104.8235 | -0.03135 | 3616 | 637.5915 | -108.3946 | -0.03562 | 3616 | 634.4709 | -106.7902 | -0.02172 | 3616 | 634.6196 | -115.3603 | -0.02524 |
| 3617 | 634.0472 | -105.5858 | -0.02137 | 3617 | 634.7587 | -104.8701 | -0.03134 | 3617 | 637.7512 | -108.4381 | -0.03546 | 3617 | 634.6379 | -106.8322 | -0.02183 | 3617 | 634.7662 | -115.3682 | -0.02526 |
| 3618 | 634.2232 | -105.5998 | -0.02144 | 3618 | 634.8996 | -104.9144 | -0.03145 | 3618 | 637.8984 | -108.4924 | -0.03551 | 3618 | 634.7949 | -106.8701 | -0.02176 | 3618 | 634.9327 | -115.386  | -0.02535 |
| 3619 | 634.4007 | -105.6143 | -0.02144 | 3619 | 635.0767 | -104.9614 | -0.03149 | 3619 | 638.0972 | -108.5464 | -0.03558 | 3619 | 634.8994 | -106.9149 | -0.02166 | 3619 | 635.0997 | -115.4027 | -0.02533 |
| 3620 | 634.5837 | -105.6316 | -0.02137 | 3620 | 635.2296 | -105.007  | -0.03141 | 3620 | 638.2623 | -108.6011 | -0.03559 | 3620 | 635.1545 | -106.9526 | -0.02172 | 3620 | 635.2897 | -115.4217 | -0.02526 |
| 3621 | 634.7313 | -105.6471 | -0.02139 | 3621 | 635.4336 | -105.057  | -0.03134 | 3621 | 638.4268 | -108.6505 | -0.03546 | 3621 | 635.3123 | -106.9959 | -0.02184 | 3621 | 635.4526 | -115.4344 | -0.0253  |
| 3622 | 634.8999 | -105.6691 | -0.02148 | 3622 | 635.5801 | -105.0988 | -0.03143 | 3622 | 638.5761 | -108.7041 | -0.03547 | 3622 | 635.4684 | -107.0353 | -0.02179 | 3622 | 635.6087 | -115.4545 | -0.02539 |
| 3623 | 635.0784 | -105.694  | -0.02148 | 3623 | 635.7468 | -105.1492 | -0.03152 | 3623 | 638.7703 | -108.7581 | -0.03562 | 3623 | 635.6561 | -107.0835 | -0.02169 | 3623 | 635.7778 | -115.4737 | -0.02541 |
| 3624 | 635.2684 | -105.7226 | -0.02141 | 3624 | 635.9055 | -105.1957 | -0.03145 | 3624 | 638.931  | -108.812  | -0.03563 | 3624 | 635.83   | -107.122  | -0.02172 | 3624 | 635.9664 | -115.4977 | -0.02534 |
| 3625 | 635.4147 | -105.7461 | -0.0214  | 3625 | 636.1023 | -105.2454 | -0.03137 | 3625 | 639.1052 | -108.859  | -0.03557 | 3625 | 635.9824 | -107.1692 | -0.02181 | 3625 | 636.1351 | -115.5162 | -0.02535 |
| 3626 | 635.5796 | -105.77   | -0.02152 | 3626 | 636.2549 | -105.2977 | -0.03146 | 3626 | 639.2517 | -108.9048 | -0.03554 | 3626 | 636.1549 | -107.2107 | -0.02179 | 3626 | 636.2809 | -115.5447 | -0.02541 |
| 3627 | 635.7605 | -105.8125 | -0.02156 | 3627 | 636.4217 | -105.3401 | -0.03158 | 3627 | 639.4336 | -108.9556 | -0.03569 | 3627 | 636.3251 | -107.2592 | -0.02169 | 3627 | 636.4556 | -115.5716 | -0.02544 |
| 3628 | 635.9362 | -105.8486 | -0.02149 | 3628 | 636.5828 | -105.3872 | -0.03156 | 3628 | 639.606  | -108.9999 | -0.03577 | 3628 | 636.5109 | -107.3009 | -0.02167 | 3628 | 636.6359 | -115.6031 | -0.02538 |
| 3629 | 636.0952 | -105.8774 | -0.02147 | 3629 | 636.769  | -105.4405 | -0.03149 | 3629 | 639.7782 | -109.0427 | -0.03567 | 3629 | 636.6541 | -107.3454 | -0.02179 | 3629 | 636.8096 | -115.6296 | -0.02535 |
| 3630 | 636.2535 | -105.913  | -0.0216  | 3630 | 636.933  | -105.486  | -0.03155 | 3630 | 639.9251 | -109.0809 | -0.03569 | 3630 | 636.8243 | -107.3868 | -0.0218  | 3630 | 636.954  | -115.6617 | -0.02541 |
| 3631 | 636.4318 | -105.9473 | -0.02168 | 3631 | 637.0902 | -105.5385 | -0.03167 | 3631 | 640.1109 | -109.1259 | -0.03587 | 3631 | 636.9952 | -107.4335 | -0.02169 | 3631 | 637.1301 | -115.6934 | -0.02546 |
| 3632 | 636.6071 | -105.9838 | -0.02161 | 3632 | 637.2523 | -105.5876 | -0.03173 | 3632 | 640.2826 | -109.1601 | -0.03594 | 3632 | 637.1888 | -107.4762 | -0.02168 | 3632 | 637.303  | -115.7288 | -0.02544 |
| 3633 | 636.7752 | -106.0137 | -0.02155 | 3633 | 637.4419 | -105.6428 | -0.03163 | 3633 | 640.4529 | -109.1951 | -0.03589 | 3633 | 637.3224 | -107.5186 | -0.02176 | 3633 | 637.4918 | -115.7571 | -0.02537 |
| 3634 | 636.9249 | -106.0466 | -0.02164 | 3634 | 637.6118 | -105.6897 | -0.03163 | 3634 | 640.5977 | -109.2271 | -0.03586 | 3634 | 637.5037 | -107.5617 | -0.02183 | 3634 | 637.634  | -115.7904 | -0.02543 |
| 3635 | 637.1097 | -106.0799 | -0.0217  | 3635 | 637.7564 | -105.744  | -0.03176 | 3635 | 640.7715 | -109.266  | -0.03601 | 3635 | 637.6595 | -107.6095 | -0.02172 | 3635 | 637.8053 | -115.8212 | -0.02552 |
| 3636 | 637.2861 | -106.118  | -0.02169 | 3636 | 637.9281 | -105.795  | -0.03176 | 3636 | 640.9548 | -109.3006 | -0.03612 | 3636 | 637.8588 | -107.6543 | -0.0217  | 3636 | 637.978  | -115.856  | -0.02549 |
| 3637 | 637.4542 | -106.1493 | -0.02161 | 3637 | 638.1035 | -105.8506 | -0.03169 | 3637 | 641.1232 | -109.3375 | -0.03606 | 3637 | 638.001  | -107.6965 | -0.02182 | 3637 | 638.1668 | -115.886  | -0.02545 |
| 3638 | 637.5995 | -106.1869 | -0.02166 | 3638 | 638.2849 | -105.9011 | -0.03164 | 3638 | 641.2747 | -109.3678 | -0.03593 | 3638 | 638.1771 | -107.7427 | -0.02188 | 3638 | 638.3024 | -115.9162 | -0.0255  |
| 3639 | 637.7826 | -106.227  | -0.02176 | 3639 | 638.4291 | -105.9551 | -0.03173 | 3639 | 641.4381 | -109.4088 | -0.03608 | 3639 | 638.3111 | -107.7879 | -0.02183 | 3639 | 638.4827 | -115.9496 | -0.02558 |
| 3640 | 637.9516 | -106.2718 | -0.02174 | 3640 | 638.6016 | -106.0046 | -0.03179 | 3640 | 641.6292 | -109.4451 | -0.03615 | 3640 | 638.5331 | -107.8333 | -0.02179 | 3640 | 638.6523 | -115.9823 | -0.02555 |
| 3641 | 638.1292 | -106.3127 | -0.02167 | 3641 | 638.7703 | -106.0623 | -0.03172 | 3641 | 641.7921 | -109.4837 | -0.0361  | 3641 | 638.6773 | -107.8716 | -0.02188 | 3641 | 638.8404 | -116.0154 | -0.02549 |
| 3642 | 638.2716 | -106.3572 | -0.02168 | 3642 | 638.9672 | -106.112  | -0.03167 | 3642 | 641.9525 | -109.5178 | -0.03593 | 3642 | 638.8475 | -107.9176 | -0.02197 | 3642 | 638.9841 | -116.0442 | -0.02552 |
| 3643 | 638.4493 | -106.409  | -0.02174 | 3643 | 639.1027 | -106.1608 | -0.03176 | 3643 | 642.1098 | -109.558  | -0.03594 | 3643 | 639.0082 | -107.9603 | -0.02192 | 3643 | 639.1583 | -116.0762 | -0.0256  |
| 3644 | 638.6243 | -106.46   | -0.02177 | 3644 | 639.2802 | -106.2099 | -0.0318  | 3644 | 642.3005 | -109.6004 | -0.03606 | 3644 | 639.2047 | -108.0049 | -0.02185 | 3644 | 639.3241 | -116.1114 | -0.02563 |
| 3645 | 638.8099 | -106.5105 | -0.02169 | 3645 | 639.4453 | -106.2586 | -0.03172 | 3645 | 642.4648 | -109.6397 | -0.03603 | 3645 | 639.3505 | -108.0429 | -0.02191 | 3645 | 639.5201 | -116.1456 | -0.02558 |
| 3646 | 638.9493 | -106.5575 | -0.0217  | 3646 | 639.6361 | -106.3035 | -0.0317  | 3646 | 642.6289 | -109.6765 | -0.0359  | 3646 | 639.517  | -108.0879 | -0.022   | 3646 | 639.6669 | -116.1782 | -0.02558 |
| 3647 | 639.1231 | -106.6115 | -0.0218  | 3647 | 639.7772 | -106.3459 | -0.03179 | 3647 | 642.769  | -109.7164 | -0.03588 | 3647 | 639.6784 | -108.1287 | -0.02198 | 3647 | 639.8303 | -116.2045 | -0.02567 |
| 3648 | 639.3012 | -106.6635 | -0.02184 | 3648 | 639.954  | -106.3917 | -0.03186 | 3648 | 642.9719 | -109.7606 | -0.03603 | 3648 | 639.8741 | -108.1737 | -0.0219  | 3648 | 640.0057 | -116.2426 | -0.02569 |
| 3649 | 639.4808 | -106.7144 | -0.02181 | 3649 | 640.1084 | -106.4334 | -0.03184 | 3649 | 643.1344 | -109.8006 | -0.03604 | 3649 | 640.0388 | -108.2071 | -0.02196 | 3649 | 640.1869 | -116.2744 | -0.02562 |
| 3650 | 639.6271 | -106.7596 | -0.0218  | 3650 | 640.3057 | -106.4804 | -0.03176 | 3650 | 643.3403 | -109.8364 | -0.03594 | 3650 | 640.1958 | -108.2454 | -0.02211 | 3650 | 640.3456 | -116.3004 | -0.02562 |
| 3651 | 639.7954 | -106.8068 | -0.02186 | 3651 | 640.4553 | -106.5191 | -0.03185 | 3651 | 643.4479 | -109.8756 | -0.03591 | 3651 | 640.3622 | -108.2797 | -0.02209 | 3651 | 640.5028 | -116.3339 | -0.02571 |
| 3652 | 639.9731 | -106.8561 | -0.02189 | 3652 | 640.6177 | -106.5672 | -0.03197 | 3652 | 643.645  | -109.9168 | -0.03606 | 3652 | 640.5547 | -108.3147 | -0.02201 | 3652 | 640.6767 | -116.3637 | -0.02575 |
| 3653 | 640.1531 | -106.9057 | -0.02181 | 3653 | 640.7845 | -106.6125 | -0.03192 | 3653 | 643.8037 | -109.9563 | -0.03614 | 3653 | 640.7175 | -108.3398 | -0.02202 | 3653 | 640.86   | -116.3976 | -0.02572 |
| 3654 | 640.3013 | -106.9446 | -0.02178 | 3654 | 640.9785 | -106.662  | -0.03188 | 3654 | 643.9815 | -109.9913 | -0.03604 | 3654 | 640.8687 | -108.3707 | -0.02214 | 3654 | 641.0275 | -116.4252 | -0.02568 |
| 3655 | 640.4628 | -106.9958 | -0.02186 | 3655 | 641.1299 | -106.7029 | -0.03191 | 3655 | 644.1239 | -110.0256 | -0.03598 | 3655 | 641.0428 | -108.3994 | -0.02217 | 3655 | 641.1751 | -116.4596 | -0.02575 |
| 3656 | 640.6473 | -107.0451 | -0.02191 | 3656 | 641.2945 | -106.7533 | -0.03203 | 3656 | 644.3133 | -110.0667 | -0.03617 | 3656 | 641.2206 | -108.4309 | -0.02207 | 3656 | 641.3524 | -116.4928 | -0.0258  |
| 3657 | 640.8228 | -107.0972 | -0.02185 | 3657 | 641.464  | -106.7996 | -0.03204 | 3657 | 644.4803 | -110.0998 | -0.03625 | 3657 | 641.3971 | -108.4542 | -0.02205 | 3657 | 641.5348 | -116.528  | -0.02572 |
| 3658 | 640.9867 | -107.1414 | -0.02182 | 3658 | 641.645  | -106.8492 | -0.03194 | 3658 | 644.6574 | -110.1373 | -0.03628 | 3658 | 641.54   | -108.4842 | -0.02217 | 3658 | 641.7063 | -116.556  | -0.02569 |
| 3659 | 641.1411 | -107.1927 | -0.0219  | 3659 | 641.8113 | -106.8908 | -0.03194 | 3659 | 644.8011 | -110.1692 | -0.03596 | 3659 | 641.7136 | -108.5116 | -0.0222  | 3659 | 641.8512 | -116.5917 | -0.02575 |
| 3660 | 641.3211 | -107.2456 | -0.02197 | 3660 | 641.9611 | -106.9392 | -0.03206 | 3660 | 644.9829 | -110.2133 | -0.03604 | 3660 | 641.8937 | -108.5463 | -0.02213 | 3660 | 642.0272 | -116.6276 | -0.0258  |
| 3661 | 641.4985 | -107.3013 | -0.02193 | 3661 | 642.1325 | -106.9853 | -0.0321  | 3661 | 645.162  | -110.2461 | -0.03608 | 3661 | 642.0797 | -108.5714 | -0.0     |      |          |           |          |



|      |          |           |          |      |          |           |          |      |          |           |          |      |          |           |          |      |          |           |          |
|------|----------|-----------|----------|------|----------|-----------|----------|------|----------|-----------|----------|------|----------|-----------|----------|------|----------|-----------|----------|
| 3723 | 651.8949 | -112.2361 | -0.02266 | 3723 | 652.6027 | -109.7077 | -0.03235 | 3723 | 655.6314 | -112.4143 | -0.03629 | 3723 | 652.5535 | -110.5771 | -0.02279 | 3723 | 652.6495 | -119.2027 | -0.02616 |
| 3724 | 652.0603 | -112.3039 | -0.02259 | 3724 | 652.7746 | -109.7522 | -0.03231 | 3724 | 655.7849 | -112.4446 | -0.03626 | 3724 | 652.6973 | -110.6117 | -0.02277 | 3724 | 652.825  | -119.2401 | -0.02611 |
| 3725 | 652.2048 | -112.3729 | -0.02259 | 3725 | 652.9543 | -109.7919 | -0.03223 | 3725 | 655.9949 | -112.4719 | -0.03613 | 3725 | 652.8798 | -110.6546 | -0.02289 | 3725 | 652.9657 | -119.2745 | -0.02607 |
| 3726 | 652.3923 | -112.4445 | -0.02268 | 3726 | 653.0953 | -109.836  | -0.03229 | 3726 | 656.1028 | -112.5006 | -0.03608 | 3726 | 653.0605 | -110.6894 | -0.02292 | 3726 | 653.1426 | -119.3187 | -0.02614 |
| 3727 | 652.5552 | -112.5098 | -0.0227  | 3727 | 653.2788 | -109.8831 | -0.03244 | 3727 | 656.3074 | -112.5374 | -0.03622 | 3727 | 653.2322 | -110.7278 | -0.02285 | 3727 | 653.3258 | -119.3588 | -0.02616 |
| 3728 | 652.7359 | -112.5767 | -0.02263 | 3728 | 653.4999 | -109.9315 | -0.03245 | 3728 | 656.4565 | -112.5714 | -0.0363  | 3728 | 653.381  | -110.7596 | -0.02275 | 3728 | 653.4939 | -119.395  | -0.02609 |
| 3729 | 652.8768 | -112.6383 | -0.02262 | 3729 | 653.6346 | -109.9797 | -0.03234 | 3729 | 656.6273 | -112.6024 | -0.03627 | 3729 | 653.5512 | -110.8014 | -0.02281 | 3729 | 653.6464 | -119.4311 | -0.02606 |
| 3730 | 653.051  | -112.7106 | -0.02268 | 3730 | 653.7706 | -110.0227 | -0.03235 | 3730 | 656.7774 | -112.6388 | -0.03622 | 3730 | 653.7396 | -110.836  | -0.02284 | 3730 | 653.816  | -119.477  | -0.02612 |
| 3731 | 653.2349 | -112.7732 | -0.02274 | 3731 | 653.9477 | -110.0767 | -0.03247 | 3731 | 656.9824 | -112.6726 | -0.03636 | 3731 | 653.9059 | -110.8705 | -0.02277 | 3731 | 654.0064 | -119.5171 | -0.02613 |
| 3732 | 653.4064 | -112.8403 | -0.02269 | 3732 | 654.1233 | -110.1291 | -0.03248 | 3732 | 657.135  | -112.7021 | -0.03644 | 3732 | 654.0616 | -110.901  | -0.02272 | 3732 | 654.1741 | -119.5565 | -0.02613 |
| 3733 | 653.553  | -112.9035 | -0.02265 | 3733 | 654.3007 | -110.1803 | -0.03238 | 3733 | 657.3034 | -112.7407 | -0.03638 | 3733 | 654.2296 | -110.9368 | -0.02284 | 3733 | 654.33   | -119.5909 | -0.02608 |
| 3734 | 653.721  | -112.9756 | -0.02274 | 3734 | 654.4462 | -110.2273 | -0.03238 | 3734 | 657.4439 | -112.7758 | -0.03629 | 3734 | 654.4203 | -110.9695 | -0.02293 | 3734 | 654.486  | -119.6308 | -0.02614 |
| 3735 | 653.9098 | -113.0445 | -0.02278 | 3735 | 654.6186 | -110.2806 | -0.03235 | 3735 | 657.657  | -112.8184 | -0.03633 | 3735 | 654.589  | -111.0013 | -0.02291 | 3735 | 654.6789 | -119.6683 | -0.02623 |
| 3736 | 654.0783 | -113.113  | -0.02275 | 3736 | 654.7929 | -110.3331 | -0.03254 | 3736 | 657.8101 | -112.8521 | -0.03644 | 3736 | 654.7471 | -111.0266 | -0.02286 | 3736 | 654.8461 | -119.7043 | -0.02619 |
| 3737 | 654.2293 | -113.1779 | -0.02271 | 3737 | 654.9712 | -110.3862 | -0.03244 | 3737 | 657.9746 | -112.8917 | -0.03638 | 3737 | 654.8987 | -111.0573 | -0.02292 | 3737 | 655.0078 | -119.7432 | -0.02612 |
| 3738 | 654.395  | -113.2481 | -0.02276 | 3738 | 655.1293 | -110.4335 | -0.03241 | 3738 | 658.1222 | -112.9274 | -0.03629 | 3738 | 655.0982 | -111.086  | -0.02301 | 3738 | 655.1589 | -119.7679 | -0.02615 |
| 3739 | 654.5801 | -113.3162 | -0.02284 | 3739 | 655.2855 | -110.4877 | -0.03254 | 3739 | 658.3233 | -112.975  | -0.03634 | 3739 | 655.2643 | -111.1137 | -0.02296 | 3739 | 655.354  | -119.8021 | -0.02625 |
| 3740 | 654.7467 | -113.3836 | -0.02281 | 3740 | 655.4695 | -110.542  | -0.0326  | 3740 | 658.4819 | -113.0108 | -0.03641 | 3740 | 655.4257 | -111.1365 | -0.02281 | 3740 | 655.5165 | -119.8364 | -0.02626 |
| 3741 | 654.9048 | -113.4438 | -0.02274 | 3741 | 655.648  | -110.5986 | -0.03255 | 3741 | 658.65   | -113.0498 | -0.03642 | 3741 | 655.5765 | -111.161  | -0.02282 | 3741 | 655.6859 | -119.8632 | -0.0262  |
| 3742 | 655.0553 | -113.5125 | -0.0228  | 3742 | 655.8013 | -110.6449 | -0.03247 | 3742 | 658.8059 | -113.0845 | -0.03629 | 3742 | 655.774  | -111.1866 | -0.02291 | 3742 | 655.8353 | -119.8938 | -0.02621 |
| 3743 | 655.2524 | -113.5802 | -0.02286 | 3743 | 655.9575 | -110.7    | -0.03259 | 3743 | 658.9855 | -113.129  | -0.03631 | 3743 | 655.9333 | -111.2123 | -0.02294 | 3743 | 656.0272 | -119.9299 | -0.02631 |
| 3744 | 655.4186 | -113.6478 | -0.02285 | 3744 | 656.1419 | -110.753  | -0.03269 | 3744 | 659.1678 | -113.1626 | -0.03648 | 3744 | 656.1072 | -111.2341 | -0.02284 | 3744 | 656.1919 | -119.9609 | -0.02636 |
| 3745 | 655.5822 | -113.7101 | -0.02278 | 3745 | 656.3098 | -110.8041 | -0.03264 | 3745 | 659.327  | -113.1989 | -0.03649 | 3745 | 656.2534 | -111.2596 | -0.02282 | 3745 | 656.3621 | -119.9917 | -0.0263  |
| 3746 | 655.7358 | -113.777  | -0.0228  | 3746 | 656.479  | -110.8493 | -0.03256 | 3746 | 659.4832 | -113.2318 | -0.03643 | 3746 | 656.4469 | -111.2899 | -0.02294 | 3746 | 656.5061 | -120.0261 | -0.02627 |
| 3747 | 655.9271 | -113.8414 | -0.02288 | 3747 | 656.6265 | -110.9004 | -0.0326  | 3747 | 659.6567 | -113.2748 | -0.03645 | 3747 | 656.6104 | -111.3184 | -0.02297 | 3747 | 656.6998 | -120.0676 | -0.02637 |
| 3748 | 656.0897 | -113.9058 | -0.02291 | 3748 | 656.8112 | -110.9528 | -0.03269 | 3748 | 659.8462 | -113.3107 | -0.03659 | 3748 | 656.783  | -111.3463 | -0.02289 | 3748 | 656.8654 | -120.1031 | -0.0264  |
| 3749 | 656.2642 | -113.9631 | -0.02283 | 3749 | 656.9854 | -111.0057 | -0.03264 | 3749 | 659.9947 | -113.3489 | -0.03663 | 3749 | 656.9247 | -111.375  | -0.02282 | 3749 | 657.0405 | -120.1425 | -0.02635 |
| 3750 | 656.4504 | -114.0214 | -0.02284 | 3750 | 657.1576 | -111.0525 | -0.03251 | 3750 | 660.1617 | -113.3839 | -0.03654 | 3750 | 657.1199 | -111.4142 | -0.02288 | 3750 | 657.1855 | -120.1801 | -0.02629 |
| 3751 | 656.5961 | -114.0818 | -0.02292 | 3751 | 657.2993 | -111.1062 | -0.03254 | 3751 | 660.3259 | -113.4279 | -0.03648 | 3751 | 657.2857 | -111.4432 | -0.02295 | 3751 | 657.3711 | -120.2252 | -0.02636 |
| 3752 | 656.7678 | -114.1392 | -0.02295 | 3752 | 657.4897 | -111.1592 | -0.03267 | 3752 | 660.5201 | -113.4655 | -0.03663 | 3752 | 657.4885 | -111.4782 | -0.0229  | 3752 | 657.5421 | -120.2627 | -0.02638 |
| 3753 | 656.9383 | -114.1935 | -0.02288 | 3753 | 657.6603 | -111.2106 | -0.03264 | 3753 | 660.706  | -113.5061 | -0.03671 | 3753 | 657.6055 | -111.508  | -0.02282 | 3753 | 657.7137 | -120.3046 | -0.02633 |
| 3754 | 657.0789 | -114.247  | -0.02286 | 3754 | 657.8318 | -111.257  | -0.03257 | 3754 | 660.8386 | -113.5391 | -0.03658 | 3754 | 657.7838 | -111.5476 | -0.02291 | 3754 | 657.8623 | -120.3415 | -0.02627 |
| 3755 | 657.2749 | -114.3061 | -0.02294 | 3755 | 657.972  | -111.3039 | -0.03263 | 3755 | 660.9897 | -113.5808 | -0.03652 | 3755 | 657.9602 | -111.5798 | -0.0229  | 3755 | 658.0406 | -120.3862 | -0.02636 |
| 3756 | 657.439  | -114.3587 | -0.02297 | 3756 | 658.1559 | -111.3554 | -0.03281 | 3756 | 661.1971 | -113.6173 | -0.03663 | 3756 | 658.1326 | -111.6161 | -0.02293 | 3756 | 658.2233 | -120.424  | -0.02644 |
| 3757 | 657.6163 | -114.4132 | -0.0229  | 3757 | 658.3248 | -111.4015 | -0.03284 | 3757 | 661.3414 | -113.6511 | -0.03671 | 3757 | 658.2865 | -111.6474 | -0.02285 | 3757 | 658.389  | -120.4627 | -0.02643 |
| 3758 | 657.7586 | -114.4615 | -0.02288 | 3758 | 658.5055 | -111.4481 | -0.03277 | 3758 | 661.5158 | -113.6851 | -0.03662 | 3758 | 658.4597 | -111.6886 | -0.02292 | 3758 | 658.5412 | -120.4976 | -0.02647 |
| 3759 | 657.937  | -114.5187 | -0.02297 | 3759 | 658.6447 | -111.4872 | -0.03275 | 3759 | 661.6643 | -113.7236 | -0.03649 | 3759 | 658.6417 | -111.7206 | -0.02303 | 3759 | 658.7117 | -120.5411 | -0.02644 |
| 3760 | 658.1184 | -114.5704 | -0.02301 | 3760 | 658.8219 | -111.5387 | -0.03289 | 3760 | 661.8711 | -113.7601 | -0.03653 | 3760 | 658.8037 | -111.7557 | -0.02299 | 3760 | 658.8973 | -120.5772 | -0.02653 |
| 3761 | 658.2864 | -114.622  | -0.02296 | 3761 | 659.0031 | -111.5842 | -0.03296 | 3761 | 662.0194 | -113.7962 | -0.03664 | 3761 | 658.961  | -111.7857 | -0.02288 | 3761 | 659.062  | -120.6178 | -0.02651 |
| 3762 | 658.4304 | -114.6724 | -0.0229  | 3762 | 659.1767 | -111.6279 | -0.03286 | 3762 | 662.1939 | -113.8352 | -0.03662 | 3762 | 659.1267 | -111.8226 | -0.02295 | 3762 | 659.2237 | -120.6503 | -0.02644 |
| 3763 | 658.6    | -114.7312 | -0.02297 | 3763 | 659.323  | -111.6683 | -0.03283 | 3763 | 662.3323 | -113.8705 | -0.03656 | 3763 | 659.3157 | -111.8524 | -0.02306 | 3763 | 659.3767 | -120.6909 | -0.02644 |
| 3764 | 658.788  | -114.7867 | -0.02301 | 3764 | 659.4937 | -111.7181 | -0.03298 | 3764 | 662.5397 | -113.9179 | -0.03661 | 3764 | 659.4755 | -111.8836 | -0.02307 | 3764 | 659.577  | -120.7279 | -0.02651 |
| 3765 | 658.9158 | -114.8457 | -0.02298 | 3765 | 659.6729 | -111.7617 | -0.03307 | 3765 | 662.6988 | -113.9548 | -0.03675 | 3765 | 659.6396 | -111.9088 | -0.02297 | 3765 | 659.7388 | -120.7637 | -0.02649 |
| 3766 | 659.111  | -114.9009 | -0.02292 | 3766 | 659.8455 | -111.8074 | -0.03303 | 3766 | 662.8599 | -113.9948 | -0.03679 | 3766 | 659.7947 | -111.9415 | -0.02295 | 3766 | 659.8997 | -120.7962 | -0.02642 |
| 3767 | 659.2733 | -114.9633 | -0.02297 | 3767 | 660.0009 | -111.8483 | -0.03295 | 3767 | 663.0134 | -114.0368 | -0.0367  | 3767 | 659.9984 | -111.9695 | -0.02309 | 3767 | 660.0604 | -120.8328 | -0.0264  |
| 3768 | 659.4638 | -115.0244 | -0.02303 | 3768 | 660.1584 | -111.8951 | -0.03307 | 3768 | 663.2116 | -114.0834 | -0.03671 | 3768 | 660.1544 | -111.9963 | -0.02313 | 3768 | 660.2589 | -120.8688 | -0.02649 |
| 3769 | 659.6257 | -115.085  | -0.02304 | 3769 | 660.3467 | -111.9429 | -0.03319 | 3769 | 663.3711 | -114.1202 | -0.03686 | 3769 | 660.3203 | -112.0222 | -0.02302 | 3769 | 660.4153 | -120.9033 | -0.02652 |
| 3770 | 659.7874 | -115.1415 | -0.02296 | 3770 | 660.5165 | -111.9905 | -0.03312 | 3770 | 663.5335 | -114.161  | -0.0369  | 3770 | 660.4721 | -112.052  | -0.02301 | 3770 | 660.5848 | -120.9342 | -0.02642 |
| 3771 | 659.9373 | -115.203  | -0.02297 | 3771 | 660.6739 | -112.0309 | -0.03301 | 3771 | 663.6906 | -114.1946 | -0.0368  | 3771 | 660.6744 | -112.0805 | -0.02312 | 3771 | 660.7302 | -120.9686 | -0.02642 |
| 3772 | 660.1356 | -115.2638 | -0.02305 | 3772 | 660.8291 | -112.0801 | -0.0331  | 3772 | 663.8754 | -114.2373 | -0.03678 | 3772 | 660.8236 | -112.1126 | -0.02316 | 3772 | 660.9243 | -121.0066 | -0.02649 |
| 3773 | 660.2955 | -115.3258 | -0.02304 | 3773 | 661.0203 | -112.1279 | -0.03322 | 3773 | 664.0549 | -114.2714 | -0.03693 | 3773 | 660.9991 | -112.1408 | -0.02311 | 3773 | 661.0863 | -121.0416 | -0.02654 |
| 3774 | 660.4619 | -115.3815 | -0.023   | 3774 | 661.1851 | -112.1748 | -0.0332  | 3774 | 664.2124 | -114.3097 | -0.03701 | 3774 | 661.1429 | -112.172  | -0.02303 |      |          |           |          |

|      |          |           |          |      |          |           |          |      |          |           |          |      |          |           |          |      |          |           |          |
|------|----------|-----------|----------|------|----------|-----------|----------|------|----------|-----------|----------|------|----------|-----------|----------|------|----------|-----------|----------|
| 3836 | 670.9026 | -118.993  | -0.02354 | 3836 | 671.6069 | -115.0638 | -0.03388 | 3836 | 674.6244 | -116.6926 | -0.03731 | 3836 | 671.5355 | -114.4635 | -0.02339 | 3836 | 671.682  | -123.6557 | -0.02706 |
| 3837 | 671.047  | -119.0404 | -0.02349 | 3837 | 671.7834 | -115.0987 | -0.0338  | 3837 | 674.8016 | -116.7020 | -0.03729 | 3837 | 671.7433 | -114.5057 | -0.0234  | 3837 | 671.8327 | -123.6869 | -0.02698 |
| 3838 | 671.2421 | -119.0957 | -0.02357 | 3838 | 671.9231 | -115.1343 | -0.03372 | 3838 | 674.9599 | -116.7566 | -0.03716 | 3838 | 671.8892 | -114.5391 | -0.02351 | 3838 | 672.0278 | -123.727  | -0.02699 |
| 3839 | 671.4064 | -119.1457 | -0.0236  | 3839 | 672.1203 | -115.1774 | -0.03382 | 3839 | 675.167  | -116.791  | -0.03717 | 3839 | 672.0576 | -114.5805 | -0.02357 | 3839 | 672.1951 | -123.7594 | -0.02706 |
| 3840 | 671.5801 | -119.1945 | -0.02368 | 3840 | 672.285  | -115.2156 | -0.03388 | 3840 | 675.3023 | -116.8261 | -0.03728 | 3840 | 672.2156 | -114.6162 | -0.0235  | 3840 | 672.3594 | -123.7953 | -0.02706 |
| 3841 | 671.7227 | -119.2402 | -0.02345 | 3841 | 672.4548 | -115.2567 | -0.0338  | 3841 | 675.4791 | -116.8628 | -0.03729 | 3841 | 672.4101 | -114.6567 | -0.02343 | 3841 | 672.5155 | -123.8252 | -0.02699 |
| 3842 | 671.9145 | -119.3001 | -0.02348 | 3842 | 672.6016 | -115.2934 | -0.0337  | 3842 | 675.603  | -116.9013 | -0.03716 | 3842 | 672.5695 | -114.6903 | -0.02351 | 3842 | 672.6982 | -123.8664 | -0.02697 |
| 3843 | 672.0885 | -119.3489 | -0.02354 | 3843 | 672.7943 | -115.3429 | -0.03376 | 3843 | 675.8353 | -116.9394 | -0.03711 | 3843 | 672.7315 | -114.731  | -0.02355 | 3843 | 672.8737 | -123.8999 | -0.02708 |
| 3844 | 672.2522 | -119.4061 | -0.02351 | 3844 | 672.9576 | -115.3856 | -0.03386 | 3844 | 675.9785 | -116.9734 | -0.03722 | 3844 | 672.8898 | -114.7626 | -0.02347 | 3844 | 673.0338 | -123.9374 | -0.02713 |
| 3845 | 672.4094 | -119.4588 | -0.02381 | 3845 | 673.1254 | -115.4338 | -0.03381 | 3845 | 676.1511 | -117.0136 | -0.03726 | 3845 | 673.0811 | -114.8028 | -0.02347 | 3845 | 673.1934 | -123.9703 | -0.02710 |
| 3846 | 672.5809 | -119.5184 | -0.02352 | 3846 | 673.281  | -115.4782 | -0.0337  | 3846 | 676.3059 | -117.0555 | -0.03713 | 3846 | 673.2515 | -114.832  | -0.02346 | 3846 | 673.3676 | -124.0115 | -0.02706 |
| 3847 | 672.7632 | -119.5758 | -0.02364 | 3847 | 673.4574 | -115.5342 | -0.03374 | 3847 | 676.5084 | -117.0995 | -0.03704 | 3847 | 673.3982 | -114.8686 | -0.02355 | 3847 | 673.5526 | -124.0458 | -0.02714 |
| 3848 | 672.9272 | -119.6344 | -0.02366 | 3848 | 673.6385 | -115.5843 | -0.03386 | 3848 | 676.6589 | -117.1331 | -0.03719 | 3848 | 673.5669 | -114.9004 | -0.02348 | 3848 | 673.7042 | -124.0865 | -0.02721 |
| 3849 | 673.0864 | -119.6889 | -0.02359 | 3849 | 673.8065 | -115.639  | -0.03384 | 3849 | 676.8255 | -117.178  | -0.0373  | 3849 | 673.752  | -114.9393 | -0.02338 | 3849 | 673.8781 | -124.1223 | -0.02715 |
| 3850 | 673.2537 | -119.747  | -0.02362 | 3850 | 673.9568 | -115.6897 | -0.03373 | 3850 | 676.9793 | -117.2204 | -0.0372  | 3850 | 673.9294 | -114.9688 | -0.02338 | 3850 | 674.0359 | -124.1635 | -0.0271  |
| 3851 | 673.4473 | -119.7965 | -0.0237  | 3851 | 674.1306 | -115.7513 | -0.03374 | 3851 | 677.1719 | -117.2609 | -0.03711 | 3851 | 674.0733 | -115.004  | -0.0235  | 3851 | 674.2324 | -124.2002 | -0.02714 |
| 3852 | 673.6045 | -119.8494 | -0.02371 | 3852 | 674.3179 | -115.8059 | -0.03386 | 3852 | 677.3381 | -117.3084 | -0.03722 | 3852 | 674.2479 | -115.0338 | -0.02351 | 3852 | 674.3842 | -124.2413 | -0.02719 |
| 3853 | 673.7704 | -119.8958 | -0.02363 | 3853 | 674.4708 | -115.8657 | -0.03387 | 3853 | 677.4908 | -117.3552 | -0.03734 | 3853 | 674.4133 | -115.0692 | -0.02341 | 3853 | 674.5535 | -124.2752 | -0.02711 |
| 3854 | 673.9233 | -119.949  | -0.02362 | 3854 | 674.6354 | -115.9201 | -0.03379 | 3854 | 677.6516 | -117.3978 | -0.03731 | 3854 | 674.6086 | -115.0982 | -0.02341 | 3854 | 674.7098 | -124.3161 | -0.02706 |
| 3855 | 674.1184 | -120.0016 | -0.02368 | 3855 | 674.7976 | -115.9855 | -0.03377 | 3855 | 677.8425 | -117.4499 | -0.03719 | 3855 | 674.749  | -115.1296 | -0.02353 | 3855 | 674.9098 | -124.3511 | -0.02711 |
| 3856 | 674.274  | -120.0606 | -0.02373 | 3856 | 674.9899 | -116.0401 | -0.03392 | 3856 | 678.014  | -117.4873 | -0.03723 | 3856 | 674.9203 | -115.1578 | -0.02359 | 3856 | 675.0521 | -124.3881 | -0.02715 |
| 3857 | 674.4433 | -120.1167 | -0.02367 | 3857 | 675.1443 | -116.0997 | -0.03396 | 3857 | 678.1658 | -117.5346 | -0.03737 | 3857 | 675.0855 | -115.1951 | -0.02352 | 3857 | 675.2297 | -124.4255 | -0.02716 |
| 3858 | 674.5872 | -120.1747 | -0.02368 | 3858 | 675.309  | -116.1545 | -0.03388 | 3858 | 678.3345 | -117.5763 | -0.03735 | 3858 | 675.2837 | -115.2247 | -0.02353 | 3858 | 675.3803 | -124.465  | -0.02704 |
| 3859 | 674.7925 | -120.2354 | -0.02378 | 3859 | 675.4644 | -116.2174 | -0.03383 | 3859 | 678.5099 | -117.6245 | -0.03719 | 3859 | 675.4177 | -115.2563 | -0.02367 | 3859 | 675.5873 | -124.5055 | -0.02709 |
| 3860 | 674.9555 | -120.2947 | -0.02384 | 3860 | 675.6737 | -116.2779 | -0.03392 | 3860 | 678.6928 | -117.6646 | -0.0372  | 3860 | 675.5983 | -115.2903 | -0.02373 | 3860 | 675.7274 | -124.5391 | -0.02719 |
| 3861 | 675.1166 | -120.3496 | -0.02381 | 3861 | 675.8182 | -116.333  | -0.03399 | 3861 | 678.8309 | -117.7106 | -0.03734 | 3861 | 675.7553 | -115.3245 | -0.02368 | 3861 | 675.9056 | -124.5805 | -0.02718 |
| 3862 | 675.2621 | -120.4063 | -0.02379 | 3862 | 675.9893 | -116.3891 | -0.03394 | 3862 | 679.0004 | -117.7523 | -0.03735 | 3862 | 675.958  | -115.3608 | -0.02364 | 3862 | 676.0485 | -124.6197 | -0.02721 |
| 3863 | 675.4678 | -120.4676 | -0.02386 | 3863 | 676.1349 | -116.4501 | -0.03389 | 3863 | 679.1699 | -117.8033 | -0.03723 | 3863 | 676.1044 | -115.3913 | -0.02372 | 3863 | 676.256  | -124.6642 | -0.02713 |
| 3864 | 675.6242 | -120.5288 | -0.0239  | 3864 | 676.3402 | -116.5104 | -0.03398 | 3864 | 679.3468 | -117.8478 | -0.0372  | 3864 | 676.2748 | -115.4282 | -0.02379 | 3864 | 676.4085 | -124.6987 | -0.02721 |
| 3865 | 675.7967 | -120.5906 | -0.02385 | 3865 | 676.4888 | -116.5691 | -0.03408 | 3865 | 679.4999 | -117.8931 | -0.03731 | 3865 | 676.4332 | -115.4606 | -0.02371 | 3865 | 676.577  | -124.7342 | -0.02724 |
| 3866 | 675.9425 | -120.6477 | -0.02378 | 3866 | 676.662  | -116.6264 | -0.03403 | 3866 | 679.678  | -117.9365 | -0.03735 | 3866 | 676.6357 | -115.4969 | -0.02361 | 3866 | 676.7297 | -124.7792 | -0.02718 |
| 3867 | 676.1356 | -120.7159 | -0.02384 | 3867 | 676.8014 | -116.6819 | -0.03398 | 3867 | 679.8411 | -117.9878 | -0.03719 | 3867 | 676.7765 | -115.5224 | -0.0237  | 3867 | 676.9339 | -124.8281 | -0.02717 |
| 3868 | 676.304  | -120.7744 | -0.0239  | 3868 | 677.0079 | -116.7472 | -0.03404 | 3868 | 680.0376 | -118.0353 | -0.03717 | 3868 | 676.945  | -115.5575 | -0.02376 | 3868 | 677.0856 | -124.8633 | -0.02728 |
| 3869 | 676.4739 | -120.8358 | -0.02387 | 3869 | 677.163  | -116.8035 | -0.03413 | 3869 | 680.1748 | -118.0788 | -0.03728 | 3869 | 677.1086 | -115.5887 | -0.02374 | 3869 | 677.2495 | -124.9061 | -0.02732 |
| 3870 | 676.6176 | -120.8996 | -0.02382 | 3870 | 677.3273 | -116.8638 | -0.03409 | 3870 | 680.3538 | -118.1272 | -0.03739 | 3870 | 677.2972 | -115.6246 | -0.02367 | 3870 | 677.4049 | -124.9426 | -0.02729 |
| 3871 | 676.8094 | -120.9547 | -0.02388 | 3871 | 677.4736 | -116.9198 | -0.03401 | 3871 | 680.5405 | -118.1737 | -0.0373  | 3871 | 677.4526 | -115.6539 | -0.02373 | 3871 | 677.5922 | -124.9901 | -0.02729 |
| 3872 | 676.98   | -121.0087 | -0.02395 | 3872 | 677.6713 | -116.9866 | -0.03408 | 3872 | 680.7069 | -118.2228 | -0.03728 | 3872 | 677.6204 | -115.6922 | -0.02382 | 3872 | 677.7628 | -125.0278 | -0.02734 |
| 3873 | 677.1404 | -121.0665 | -0.02393 | 3873 | 677.8314 | -117.0466 | -0.03417 | 3873 | 680.849  | -118.2634 | -0.03742 | 3873 | 677.7777 | -115.7261 | -0.02383 | 3873 | 677.9238 | -125.0714 | -0.02734 |
| 3874 | 677.2967 | -121.1169 | -0.02386 | 3874 | 677.9992 | -117.1096 | -0.03415 | 3874 | 681.0177 | -118.3122 | -0.03753 | 3874 | 677.9712 | -115.7661 | -0.02373 | 3874 | 678.0806 | -125.1054 | -0.02737 |
| 3875 | 677.4741 | -121.1767 | -0.02386 | 3875 | 678.1511 | -117.1653 | -0.03404 | 3875 | 681.1843 | -118.3561 | -0.03751 | 3875 | 678.1375 | -115.7951 | -0.02373 | 3875 | 678.2593 | -125.1523 | -0.02734 |
| 3876 | 677.6568 | -121.2291 | -0.02393 | 3876 | 678.334  | -117.2347 | -0.03408 | 3876 | 681.3788 | -118.4007 | -0.03745 | 3876 | 678.2821 | -115.8326 | -0.02382 | 3876 | 678.4461 | -125.1894 | -0.0274  |
| 3877 | 677.8177 | -121.2884 | -0.02393 | 3877 | 678.5088 | -117.2931 | -0.0342  | 3877 | 681.5621 | -118.4373 | -0.03749 | 3877 | 678.4505 | -115.8651 | -0.0238  | 3877 | 678.5892 | -125.2288 | -0.02749 |
| 3878 | 677.9739 | -121.3406 | -0.02388 | 3878 | 678.6649 | -117.3566 | -0.0342  | 3878 | 681.6893 | -118.481  | -0.03764 | 3878 | 678.6392 | -115.9005 | -0.0237  | 3878 | 678.7631 | -125.2665 | -0.02747 |
| 3879 | 678.1378 | -121.4068 | -0.02387 | 3879 | 678.8167 | -117.4142 | -0.03413 | 3879 | 681.8528 | -118.5213 | -0.03761 | 3879 | 678.8044 | -115.9251 | -0.02362 | 3879 | 678.9307 | -125.311  | -0.02744 |
| 3880 | 678.3377 | -121.4676 | -0.02393 | 3880 | 678.9951 | -117.4839 | -0.03411 | 3880 | 682.0419 | -118.5637 | -0.03749 | 3880 | 678.9534 | -115.9583 | -0.02374 | 3880 | 679.1202 | -125.3487 | -0.02748 |
| 3881 | 678.4845 | -121.5303 | -0.02397 | 3881 | 679.1774 | -117.5453 | -0.03423 | 3881 | 682.212  | -118.5977 | -0.03753 | 3881 | 679.1253 | -115.989  | -0.02375 | 3881 | 679.2626 | -125.3911 | -0.02753 |
| 3882 | 678.653  | -121.5913 | -0.02392 | 3882 | 679.3278 | -117.6119 | -0.03423 | 3882 | 682.3574 | -118.6386 | -0.03764 | 3882 | 679.3021 | -116.0256 | -0.02368 | 3882 | 679.4363 | -125.4293 | -0.02751 |
| 3883 | 678.8133 | -121.6577 | -0.02391 | 3883 | 679.4939 | -117.6713 | -0.03413 | 3883 | 682.5258 | -118.6798 | -0.03762 | 3883 | 679.4821 | -116.0559 | -0.02363 | 3883 | 679.5907 | -125.4555 | -0.02742 |
| 3884 | 679.0087 | -121.718  | -0.02399 | 3884 | 679.6625 | -117.74   | -0.03411 | 3884 | 682.7125 | -118.7266 | -0.03742 | 3884 | 679.6257 | -116.0933 | -0.02375 | 3884 | 679.7969 | -125.5161 | -0.02742 |
| 3885 | 679.1615 | -121.7787 | -0.02405 | 3885 | 679.8497 | -117.801  | -0.0342  | 3885 | 682.8801 | -118.7614 | -0.0374  | 3885 | 679.7955 | -116.1289 | -0.02383 | 3885 | 679.9335 | -125.5534 | -0.02747 |
| 3886 | 679.3289 | -121.8339 | -0.024   | 3886 | 679.9977 | -117.8644 | -0.03427 | 3886 | 683.0215 | -118.8044 | -0.03744 | 3886 | 679.9738 | -116.1729 | -0.02379 | 3886 | 680.1069 | -125.5942 | -0.02748 |
| 3887 | 679.4729 | -121.8943 | -0.02397 | 3887 | 680.1678 | -117.9244 | -0.03422 | 3887 | 683.1967 | -118.8466 | -0.03742 | 3887 | 680.1603 | -116.2106 |          |      |          |           |          |

|      |          |           |          |      |          |           |          |      |          |           |          |      |          |           |          |      |          |           |          |
|------|----------|-----------|----------|------|----------|-----------|----------|------|----------|-----------|----------|------|----------|-----------|----------|------|----------|-----------|----------|
| 3949 | 689.8735 | -125.6827 | -0.02441 | 3949 | 690.5682 | -121.365  | -0.03481 | 3949 | 693.5856 | -121.7754 | -0.03782 | 3949 | 690.5286 | -119.2636 | -0.02407 | 3949 | 690.6534 | -128.1799 | -0.02794 |
| 3950 | 690.0872 | -125.7577 | -0.02441 | 3950 | 690.7244 | -121.4256 | -0.03473 | 3950 | 693.5786 | -121.817  | -0.03776 | 3950 | 690.6749 | -119.3153 | -0.02402 | 3950 | 690.8461 | -128.2207 | -0.02788 |
| 3951 | 690.2318 | -125.8215 | -0.02447 | 3951 | 690.9257 | -121.4816 | -0.03471 | 3951 | 693.5856 | -121.8604 | -0.03764 | 3951 | 690.8506 | -119.3757 | -0.02413 | 3951 | 690.994  | -128.2552 | -0.02793 |
| 3952 | 690.4038 | -125.8949 | -0.02448 | 3952 | 691.0618 | -121.5373 | -0.03483 | 3952 | 694.0826 | -121.8958 | -0.03765 | 3952 | 691.0316 | -119.4309 | -0.02422 | 3952 | 691.163  | -128.2945 | -0.02803 |
| 3953 | 690.5544 | -125.9622 | -0.02441 | 3953 | 691.2116 | -121.5961 | -0.03484 | 3953 | 694.2551 | -121.9606 | -0.03776 | 3953 | 691.2034 | -119.487  | -0.02415 | 3953 | 691.3234 | -128.3323 | -0.02802 |
| 3954 | 690.7481 | -126.0378 | -0.0244  | 3954 | 691.3916 | -121.6538 | -0.03476 | 3954 | 694.429  | -121.9844 | -0.03777 | 3954 | 691.3433 | -119.5379 | -0.0241  | 3954 | 691.5134 | -128.3718 | -0.02796 |
| 3955 | 690.9094 | -126.102  | -0.02446 | 3955 | 691.5969 | -121.7156 | -0.03475 | 3955 | 694.613  | -122.028  | -0.03764 | 3955 | 691.5203 | -119.5987 | -0.02416 | 3955 | 691.6636 | -128.4029 | -0.02797 |
| 3956 | 691.0721 | -126.171  | -0.02446 | 3956 | 691.7407 | -121.7725 | -0.03484 | 3956 | 694.7532 | -122.0659 | -0.03765 | 3956 | 691.7056 | -119.6509 | -0.02425 | 3956 | 691.8209 | -128.442  | -0.02806 |
| 3957 | 691.2332 | -126.2343 | -0.02439 | 3957 | 691.9118 | -121.8329 | -0.03493 | 3957 | 694.9224 | -122.1127 | -0.03776 | 3957 | 691.867  | -119.7052 | -0.02418 | 3957 | 691.9941 | -128.4812 | -0.02808 |
| 3958 | 691.4111 | -126.3086 | -0.02434 | 3958 | 692.0681 | -121.8895 | -0.03485 | 3958 | 695.0955 | -122.1589 | -0.03777 | 3958 | 692.0236 | -119.7545 | -0.02421 | 3958 | 692.1749 | -128.5172 | -0.02810 |
| 3959 | 691.5844 | -126.3696 | -0.02442 | 3959 | 692.2717 | -121.9503 | -0.0348  | 3959 | 695.2779 | -122.2081 | -0.03764 | 3959 | 692.1887 | -119.8093 | -0.02417 | 3959 | 692.3389 | -128.5474 | -0.02799 |
| 3960 | 691.7358 | -126.4369 | -0.02445 | 3960 | 692.418  | -121.9999 | -0.03489 | 3960 | 695.4343 | -122.2507 | -0.03755 | 3960 | 692.3773 | -119.8584 | -0.02423 | 3960 | 692.4974 | -128.5871 | -0.02808 |
| 3961 | 691.9042 | -126.4959 | -0.02437 | 3961 | 692.5824 | -122.0566 | -0.03499 | 3961 | 695.5902 | -122.3004 | -0.0377  | 3961 | 692.5423 | -119.9111 | -0.02424 | 3961 | 692.6688 | -128.6248 | -0.02812 |
| 3962 | 692.0821 | -126.5657 | -0.02436 | 3962 | 692.7409 | -122.1102 | -0.03494 | 3962 | 695.7708 | -122.3438 | -0.03778 | 3962 | 692.7043 | -119.9552 | -0.02413 | 3962 | 692.8473 | -128.6655 | -0.02809 |
| 3963 | 692.2604 | -126.6239 | -0.02444 | 3963 | 692.9312 | -122.168  | -0.03486 | 3963 | 695.9469 | -122.3985 | -0.03772 | 3963 | 692.8539 | -120.0061 | -0.02412 | 3963 | 693.019  | -128.7014 | -0.02807 |
| 3964 | 692.4119 | -126.6869 | -0.0245  | 3964 | 693.093  | -122.2161 | -0.03495 | 3964 | 696.1079 | -122.4424 | -0.03769 | 3964 | 693.0556 | -120.0552 | -0.02423 | 3964 | 693.1633 | -128.7415 | -0.02816 |
| 3965 | 692.5804 | -126.7425 | -0.02445 | 3965 | 693.2517 | -122.2715 | -0.03507 | 3965 | 696.2571 | -122.4864 | -0.03784 | 3965 | 693.2141 | -120.1017 | -0.02421 | 3965 | 693.3401 | -128.7824 | -0.0282  |
| 3966 | 692.7418 | -126.8082 | -0.02442 | 3966 | 693.4117 | -122.3216 | -0.03505 | 3966 | 696.4378 | -122.5334 | -0.03795 | 3966 | 693.2768 | -120.1455 | -0.02414 | 3966 | 693.5198 | -128.825  | -0.02817 |
| 3967 | 692.9385 | -126.8663 | -0.02446 | 3967 | 693.6008 | -122.3804 | -0.03495 | 3967 | 696.6904 | -122.5822 | -0.03789 | 3967 | 693.2886 | -120.195  | -0.02414 | 3967 | 693.6967 | -128.8575 | -0.02812 |
| 3968 | 693.0841 | -126.9279 | -0.02453 | 3968 | 693.7723 | -122.4286 | -0.03501 | 3968 | 696.7808 | -122.6246 | -0.03776 | 3968 | 693.7239 | -120.2459 | -0.02426 | 3968 | 693.8362 | -128.8964 | -0.02816 |
| 3969 | 693.2503 | -126.9873 | -0.02447 | 3969 | 693.915  | -122.4858 | -0.03511 | 3969 | 696.9258 | -122.6726 | -0.03784 | 3969 | 693.8844 | -120.2986 | -0.02432 | 3969 | 694.0162 | -128.932  | -0.0282  |
| 3970 | 693.4102 | -127.0498 | -0.0244  | 3970 | 694.0883 | -122.5397 | -0.03508 | 3970 | 697.1007 | -122.7216 | -0.03788 | 3970 | 694.0572 | -120.3477 | -0.02427 | 3970 | 694.1859 | -128.973  | -0.02817 |
| 3971 | 693.6124 | -127.1066 | -0.02445 | 3971 | 694.2667 | -122.6018 | -0.03495 | 3971 | 697.2738 | -122.7732 | -0.03779 | 3971 | 694.192  | -120.3971 | -0.02425 | 3971 | 694.3719 | -129.0085 | -0.02814 |
| 3972 | 693.751  | -127.167  | -0.02449 | 3972 | 694.4437 | -122.6546 | -0.03493 | 3972 | 697.4518 | -122.8184 | -0.0377  | 3972 | 694.3966 | -120.4522 | -0.02437 | 3972 | 694.5073 | -129.0477 | -0.02816 |
| 3973 | 693.9282 | -127.2241 | -0.02449 | 3973 | 694.5867 | -122.7155 | -0.03502 | 3973 | 697.5898 | -122.8677 | -0.03777 | 3973 | 694.5568 | -120.5032 | -0.02441 | 3973 | 694.6857 | -129.0888 | -0.02823 |
| 3974 | 694.0754 | -127.2879 | -0.02446 | 3974 | 694.761  | -122.773  | -0.03503 | 3974 | 697.7725 | -122.9201 | -0.03792 | 3974 | 694.727  | -120.5505 | -0.02433 | 3974 | 694.8547 | -129.1307 | -0.02821 |
| 3975 | 694.2851 | -127.349  | -0.02451 | 3975 | 694.9249 | -122.8371 | -0.03495 | 3975 | 697.9452 | -122.9707 | -0.03793 | 3975 | 694.8692 | -120.597  | -0.02428 | 3975 | 695.0476 | -129.1735 | -0.02816 |
| 3976 | 694.4276 | -127.4076 | -0.02462 | 3976 | 695.1135 | -122.8951 | -0.03493 | 3976 | 698.1203 | -123.0211 | -0.03784 | 3976 | 695.0711 | -120.653  | -0.02438 | 3976 | 695.1798 | -129.2116 | -0.02816 |
| 3977 | 694.6039 | -127.4673 | -0.02465 | 3977 | 695.2475 | -122.9581 | -0.03505 | 3977 | 698.2633 | -123.07   | -0.03785 | 3977 | 695.2278 | -120.6985 | -0.02444 | 3977 | 695.3574 | -129.256  | -0.02827 |
| 3978 | 694.7461 | -127.528  | -0.02462 | 3978 | 695.4219 | -123.0197 | -0.03512 | 3978 | 698.4398 | -123.1254 | -0.03796 | 3978 | 695.402  | -120.7506 | -0.02436 | 3978 | 695.5256 | -129.2993 | -0.02827 |
| 3979 | 694.9558 | -127.5944 | -0.02464 | 3979 | 695.5879 | -123.0888 | -0.03504 | 3979 | 698.6112 | -123.1788 | -0.03793 | 3979 | 695.5475 | -120.796  | -0.02429 | 3979 | 695.7081 | -129.343  | -0.02822 |
| 3980 | 695.1047 | -127.6496 | -0.02472 | 3980 | 695.7842 | -123.1519 | -0.03499 | 3980 | 698.7927 | -123.2334 | -0.03771 | 3980 | 695.7315 | -120.8546 | -0.02435 | 3980 | 695.8538 | -129.3804 | -0.02823 |
| 3981 | 695.2729 | -127.713  | -0.02473 | 3981 | 695.9166 | -123.2147 | -0.03508 | 3981 | 698.9315 | -123.2798 | -0.03757 | 3981 | 695.904  | -120.9023 | -0.02444 | 3981 | 696.0225 | -129.4261 | -0.02829 |
| 3982 | 695.425  | -127.7704 | -0.02465 | 3982 | 696.0969 | -123.2801 | -0.03512 | 3982 | 699.1012 | -123.3327 | -0.03762 | 3982 | 696.0712 | -120.9555 | -0.02442 | 3982 | 696.1964 | -129.4691 | -0.0283  |
| 3983 | 695.6228 | -127.8366 | -0.02464 | 3983 | 696.257  | -123.3455 | -0.03504 | 3983 | 699.2793 | -123.3821 | -0.03753 | 3983 | 696.22   | -121.0066 | -0.02432 | 3983 | 696.3837 | -129.5136 | -0.02822 |
| 3984 | 695.7831 | -127.8913 | -0.02472 | 3984 | 696.4542 | -123.4099 | -0.035   | 3984 | 699.4536 | -123.4303 | -0.03726 | 3984 | 696.3964 | -121.0565 | -0.02435 | 3984 | 696.5553 | -129.5479 | -0.02829 |
| 3985 | 695.9454 | -127.9509 | -0.02475 | 3985 | 696.593  | -123.4676 | -0.03508 | 3985 | 699.6057 | -123.4712 | -0.03707 | 3985 | 696.5774 | -121.1034 | -0.0245  | 3985 | 696.6945 | -129.5916 | -0.02825 |
| 3986 | 696.0942 | -128.0037 | -0.0247  | 3986 | 696.762  | -123.535  | -0.03518 | 3986 | 699.7667 | -123.5192 | -0.03714 | 3986 | 696.7328 | -121.1553 | -0.0245  | 3986 | 696.8737 | -129.6298 | -0.02828 |
| 3987 | 696.2861 | -128.066  | -0.02468 | 3987 | 696.9224 | -123.5989 | -0.03516 | 3987 | 699.9258 | -123.5656 | -0.03716 | 3987 | 696.8923 | -121.2007 | -0.02443 | 3987 | 697.0501 | -129.6697 | -0.02823 |
| 3988 | 696.4548 | -128.1143 | -0.02475 | 3988 | 697.1208 | -123.6671 | -0.03511 | 3988 | 700.1276 | -123.6227 | -0.03706 | 3988 | 697.0594 | -121.2529 | -0.02444 | 3988 | 697.2133 | -129.7006 | -0.02823 |
| 3989 | 696.6013 | -128.1704 | -0.02475 | 3989 | 697.2688 | -123.7243 | -0.0352  | 3989 | 700.2857 | -123.6533 | -0.03696 | 3989 | 697.2452 | -121.2985 | -0.02452 | 3989 | 697.3657 | -129.7376 | -0.0283  |
| 3990 | 696.764  | -128.2211 | -0.02472 | 3990 | 697.4305 | -123.7894 | -0.03532 | 3990 | 700.4418 | -123.7027 | -0.03711 | 3990 | 697.4061 | -121.353  | -0.02456 | 3990 | 697.5431 | -129.77   | -0.02834 |
| 3991 | 696.9469 | -128.2836 | -0.02469 | 3991 | 697.6007 | -123.8547 | -0.0353  | 3991 | 700.6235 | -123.7523 | -0.03726 | 3991 | 697.5698 | -121.4007 | -0.02443 | 3991 | 697.7218 | -129.8055 | -0.02829 |
| 3992 | 697.1245 | -128.338  | -0.02473 | 3992 | 697.7848 | -123.9106 | -0.03522 | 3992 | 700.7969 | -123.803  | -0.03724 | 3992 | 697.7216 | -121.4642 | -0.02436 | 3992 | 697.8887 | -129.837  | -0.02823 |
| 3993 | 697.2723 | -128.4    | -0.02479 | 3993 | 697.9403 | -123.9603 | -0.03529 | 3993 | 700.9584 | -123.8436 | -0.03714 | 3993 | 697.9186 | -121.5194 | -0.02445 | 3993 | 698.0335 | -129.8653 | -0.0283  |
| 3994 | 697.4429 | -128.4579 | -0.02476 | 3994 | 698.099  | -124.0172 | -0.03538 | 3994 | 701.1075 | -123.8916 | -0.03725 | 3994 | 698.0717 | -121.5754 | -0.02445 | 3994 | 698.2124 | -129.8991 | -0.02834 |
| 3995 | 697.6046 | -128.5271 | -0.02469 | 3995 | 698.267  | -124.0673 | -0.03539 | 3995 | 701.2909 | -123.9371 | -0.0374  | 3995 | 698.2385 | -121.6274 | -0.02438 | 3995 | 698.3863 | -129.9355 | -0.02829 |
| 3996 | 697.794  | -128.5909 | -0.02473 | 3996 | 698.435  | -124.1203 | -0.03529 | 3996 | 701.4581 | -123.9841 | -0.03741 | 3996 | 698.3914 | -121.6865 | -0.02433 | 3996 | 698.558  | -129.9624 | -0.02819 |
| 3997 | 697.9398 | -128.6588 | -0.02479 | 3997 | 698.6242 | -124.1607 | -0.03532 | 3997 | 701.6318 | -124.0327 | -0.03731 | 3997 | 698.5947 | -121.7369 | -0.02445 | 3997 | 698.7037 | -129.9968 | -0.02824 |
| 3998 | 698.1113 | -128.7236 | -0.02476 | 3998 | 698.7666 | -124.2087 | -0.03541 | 3998 | 701.7804 | -124.0993 | -0.03743 | 3998 | 698.7414 | -121.7885 | -0.02454 | 3998 | 698.8889 | -130.0308 | -0.02832 |
| 3999 | 698.2685 | -128.7953 | -0.02469 | 3999 | 698.9398 | -124.2569 | -0.03545 | 3999 | 701.9589 | -124.1172 | -0.03761 | 3999 | 698.9128 | -121.8387 | -0.02446 | 3999 | 699.058  | -130.0662 | -0.02831 |
| 4000 | 698.4698 | -128.8595 | -0.02471 | 4000 | 699.1199 | -124.3082 | -0.03532 | 4000 | 702.1297 | -124.1637 | -0.03762 | 4000 | 699.0546 | -121.8958 | -0.02442 |      |          |           |          |

|      |          |           |          |      |          |           |          |      |          |           |          |      |          |           |          |      |          |           |          |
|------|----------|-----------|----------|------|----------|-----------|----------|------|----------|-----------|----------|------|----------|-----------|----------|------|----------|-----------|----------|
| 4062 | 708.8764 | -132.3309 | -0.02523 | 4062 | 709.4707 | -127.9765 | -0.03588 | 4062 | 712.4907 | -127.5247 | -0.03837 | 4062 | 709.4258 | -125.5139 | -0.02496 | 4062 | 709.6157 | -132.8687 | -0.02889 |
| 4063 | 709.0158 | -132.3913 | -0.02524 | 4063 | 709.6428 | -128.0332 | -0.0358  | 4063 | 712.6496 | -127.5832 | -0.03827 | 4063 | 709.6296 | -125.5759 | -0.02488 | 4063 | 709.7554 | -132.9109 | -0.02886 |
| 4064 | 709.1931 | -132.4601 | -0.02524 | 4064 | 709.7864 | -128.0912 | -0.03584 | 4064 | 712.8024 | -127.6353 | -0.03814 | 4064 | 709.7639 | -125.6317 | -0.02497 | 4064 | 709.8368 | -132.9658 | -0.02894 |
| 4065 | 709.3436 | -132.5284 | -0.02525 | 4065 | 709.9681 | -128.152  | -0.03593 | 4065 | 712.9744 | -127.6979 | -0.03822 | 4065 | 709.937  | -125.6939 | -0.02501 | 4065 | 710.1184 | -133.0149 | -0.02905 |
| 4066 | 709.5447 | -132.5982 | -0.02525 | 4066 | 710.135  | -128.2081 | -0.03596 | 4066 | 713.1521 | -127.7513 | -0.03834 | 4066 | 710.0977 | -125.7535 | -0.02496 | 4066 | 710.2765 | -133.0644 | -0.02901 |
| 4067 | 709.6899 | -132.6625 | -0.02525 | 4067 | 710.3164 | -128.2634 | -0.03583 | 4067 | 713.3164 | -127.8084 | -0.03828 | 4067 | 710.2899 | -125.8156 | -0.02486 | 4067 | 710.4275 | -133.1088 | -0.02894 |
| 4068 | 709.8539 | -132.7325 | -0.02526 | 4068 | 710.4512 | -128.3115 | -0.03584 | 4068 | 713.4768 | -127.8602 | -0.03822 | 4068 | 710.4374 | -125.8726 | -0.02492 | 4068 | 710.6027 | -133.1628 | -0.02896 |
| 4069 | 710.0115 | -132.7986 | -0.02525 | 4069 | 710.6346 | -128.3716 | -0.03593 | 4069 | 713.6559 | -127.9199 | -0.03823 | 4069 | 710.6053 | -125.9345 | -0.02501 | 4069 | 710.7853 | -133.2094 | -0.02903 |
| 4070 | 710.2092 | -132.8641 | -0.02525 | 4070 | 710.8153 | -128.4234 | -0.03594 | 4070 | 713.8275 | -127.9719 | -0.03834 | 4070 | 710.7643 | -125.9941 | -0.02499 | 4070 | 710.9491 | -133.2587 | -0.029   |
| 4071 | 710.3621 | -132.9197 | -0.02528 | 4071 | 710.9822 | -128.478  | -0.03586 | 4071 | 713.9829 | -128.0288 | -0.03835 | 4071 | 710.9607 | -126.0561 | -0.02494 | 4071 | 711.1014 | -133.3026 | -0.0289  |
| 4072 | 710.523  | -132.9835 | -0.02534 | 4072 | 711.1242 | -128.5283 | -0.03584 | 4072 | 714.1461 | -128.0795 | -0.03818 | 4072 | 711.1182 | -126.1094 | -0.025   | 4072 | 711.2643 | -133.3553 | -0.02891 |
| 4073 | 710.6832 | -133.0428 | -0.02533 | 4073 | 711.2958 | -128.5894 | -0.03596 | 4073 | 714.3023 | -128.1357 | -0.03813 | 4073 | 711.2744 | -126.1705 | -0.02509 | 4073 | 711.4595 | -133.404  | -0.02897 |
| 4074 | 710.8718 | -133.1073 | -0.02527 | 4074 | 711.4763 | -128.6459 | -0.03603 | 4074 | 714.5066 | -128.1892 | -0.03821 | 4074 | 711.4382 | -126.227  | -0.0251  | 4074 | 711.6171 | -133.4522 | -0.02898 |
| 4075 | 711.0344 | -133.1616 | -0.02523 | 4075 | 711.649  | -128.7014 | -0.03598 | 4075 | 714.6529 | -128.2418 | -0.03818 | 4075 | 711.6265 | -126.2852 | -0.025   | 4075 | 711.7797 | -133.496  | -0.0289  |
| 4076 | 711.1903 | -133.2278 | -0.02528 | 4076 | 711.8004 | -128.7542 | -0.03596 | 4076 | 714.819  | -128.2925 | -0.03805 | 4076 | 711.7833 | -126.3384 | -0.02501 | 4076 | 711.9334 | -133.5469 | -0.02891 |
| 4077 | 711.3522 | -133.2873 | -0.02538 | 4077 | 711.9573 | -128.8154 | -0.03605 | 4077 | 714.9658 | -128.3451 | -0.03803 | 4077 | 711.9417 | -126.3983 | -0.02509 | 4077 | 712.1383 | -133.5937 | -0.02897 |
| 4078 | 711.5402 | -133.3557 | -0.02531 | 4078 | 712.148  | -128.8751 | -0.03611 | 4078 | 715.1694 | -128.398  | -0.03817 | 4078 | 712.1099 | -126.4561 | -0.0251  | 4078 | 712.2844 | -133.6405 | -0.029   |
| 4079 | 711.7142 | -133.414  | -0.02532 | 4079 | 712.3228 | -128.9367 | -0.03601 | 4079 | 715.3192 | -128.4517 | -0.03822 | 4079 | 712.2922 | -126.5181 | -0.025   | 4079 | 712.4522 | -133.685  | -0.02895 |
| 4080 | 711.8588 | -133.4798 | -0.0254  | 4080 | 712.472  | -128.9921 | -0.03593 | 4080 | 715.4887 | -128.4996 | -0.03812 | 4080 | 712.465  | -126.5708 | -0.02498 | 4080 | 712.5947 | -133.7319 | -0.02893 |
| 4081 | 712.0341 | -133.5411 | -0.02541 | 4081 | 712.6328 | -129.0548 | -0.036   | 4081 | 715.6281 | -128.5512 | -0.0381  | 4081 | 712.6101 | -126.6313 | -0.02507 | 4081 | 712.8029 | -133.7786 | -0.029   |
| 4082 | 712.2119 | -133.6038 | -0.02533 | 4082 | 712.8187 | -129.1142 | -0.03606 | 4082 | 715.8346 | -128.6081 | -0.03824 | 4082 | 712.7839 | -126.6885 | -0.02508 | 4082 | 712.9559 | -133.8254 | -0.02904 |
| 4083 | 712.3937 | -133.6576 | -0.02532 | 4083 | 713.0032 | -129.1745 | -0.03601 | 4083 | 715.9846 | -128.6585 | -0.03829 | 4083 | 712.9653 | -126.751  | -0.02498 | 4083 | 713.1246 | -133.8675 | -0.02899 |
| 4084 | 712.5325 | -133.7147 | -0.02542 | 4084 | 713.1423 | -129.2257 | -0.03591 | 4084 | 716.1551 | -128.7128 | -0.03823 | 4084 | 713.1439 | -126.803  | -0.02493 | 4084 | 713.2634 | -133.9139 | -0.02897 |
| 4085 | 712.7062 | -133.7653 | -0.02545 | 4085 | 713.2945 | -129.2803 | -0.03597 | 4085 | 716.2973 | -128.764  | -0.03817 | 4085 | 713.2799 | -126.8593 | -0.02502 | 4085 | 713.4746 | -133.9629 | -0.02904 |
| 4086 | 712.875  | -133.8189 | -0.02538 | 4086 | 713.4848 | -129.339  | -0.03609 | 4086 | 716.494  | -128.8261 | -0.03825 | 4086 | 713.4601 | -126.9149 | -0.02508 | 4086 | 713.6274 | -134.0095 | -0.0291  |
| 4087 | 713.07   | -133.8642 | -0.02536 | 4087 | 713.6502 | -129.3949 | -0.03607 | 4087 | 716.6574 | -128.8785 | -0.03826 | 4087 | 713.6267 | -126.973  | -0.02501 | 4087 | 713.7972 | -134.0568 | -0.02907 |
| 4088 | 713.2001 | -133.9133 | -0.02542 | 4088 | 713.8151 | -129.4432 | -0.03594 | 4088 | 716.8247 | -128.9358 | -0.03827 | 4088 | 713.814  | -127.0259 | -0.02496 | 4088 | 713.939  | -134.1027 | -0.02903 |
| 4089 | 713.3772 | -133.9658 | -0.02549 | 4089 | 713.9526 | -129.498  | -0.03597 | 4089 | 716.9696 | -128.9882 | -0.03817 | 4089 | 713.9473 | -127.0788 | -0.02505 | 4089 | 714.1373 | -134.1569 | -0.02908 |
| 4090 | 713.545  | -134.0176 | -0.02544 | 4090 | 714.1555 | -129.5568 | -0.03607 | 4090 | 717.1556 | -129.0502 | -0.03825 | 4090 | 714.1234 | -127.1335 | -0.02514 | 4090 | 714.2966 | -134.2009 | -0.02916 |
| 4091 | 713.738  | -134.0692 | -0.0254  | 4091 | 714.3226 | -129.6144 | -0.03605 | 4091 | 717.33   | -129.1057 | -0.0384  | 4091 | 714.2902 | -127.1917 | -0.02509 | 4091 | 714.4659 | -134.2486 | -0.02915 |
| 4092 | 713.9376 | -134.1199 | -0.02546 | 4092 | 714.4926 | -129.6699 | -0.03599 | 4092 | 717.4866 | -129.1623 | -0.03834 | 4092 | 714.4835 | -127.249  | -0.02502 | 4092 | 714.6142 | -134.2883 | -0.02907 |
| 4093 | 714.0494 | -134.1788 | -0.02555 | 4093 | 714.635  | -129.7238 | -0.03597 | 4093 | 717.6434 | -129.2155 | -0.03824 | 4093 | 714.6444 | -127.3028 | -0.02508 | 4093 | 714.7946 | -134.3372 | -0.0291  |
| 4094 | 714.208  | -134.2343 | -0.02551 | 4094 | 714.8216 | -129.7824 | -0.03612 | 4094 | 717.8226 | -129.277  | -0.03829 | 4094 | 714.7884 | -127.3631 | -0.02517 | 4094 | 714.9711 | -134.376  | -0.02919 |
| 4095 | 714.4069 | -134.2907 | -0.02546 | 4095 | 714.9798 | -129.8396 | -0.03616 | 4095 | 717.9998 | -129.3305 | -0.03843 | 4095 | 714.9601 | -127.4234 | -0.02515 | 4095 | 715.1317 | -134.4175 | -0.02917 |
| 4096 | 714.5493 | -134.3434 | -0.0255  | 4096 | 715.1556 | -129.8986 | -0.03608 | 4096 | 718.1604 | -129.3878 | -0.03844 | 4096 | 715.1417 | -127.4879 | -0.02505 | 4096 | 715.2794 | -134.4549 | -0.02912 |
| 4097 | 714.7147 | -134.4047 | -0.02557 | 4097 | 715.2968 | -129.9558 | -0.03606 | 4097 | 718.3176 | -129.4369 | -0.03835 | 4097 | 715.2847 | -127.545  | -0.02505 | 4097 | 715.4644 | -134.5046 | -0.02912 |
| 4098 | 714.8812 | -134.4636 | -0.02553 | 4098 | 715.4836 | -130.02   | -0.03621 | 4098 | 718.4764 | -129.474  | -0.03833 | 4098 | 715.4554 | -127.6095 | -0.02514 | 4098 | 715.6423 | -134.546  | -0.02921 |
| 4099 | 715.0747 | -134.5251 | -0.02546 | 4099 | 715.6566 | -130.077  | -0.03625 | 4099 | 718.6173 | -129.5284 | -0.03847 | 4099 | 715.6163 | -127.674  | -0.02512 | 4099 | 715.8015 | -134.5963 | -0.02921 |
| 4100 | 715.2222 | -134.5793 | -0.02549 | 4100 | 715.8238 | -130.1374 | -0.03614 | 4100 | 718.8224 | -129.6012 | -0.03851 | 4100 | 715.804  | -127.7408 | -0.02505 | 4100 | 715.9572 | -134.6425 | -0.02914 |
| 4101 | 715.3898 | -134.6399 | -0.02553 | 4101 | 715.9685 | -130.1976 | -0.03606 | 4101 | 718.9827 | -129.6526 | -0.03842 | 4101 | 715.9525 | -127.8018 | -0.02508 | 4101 | 716.125  | -134.6973 | -0.0291  |
| 4102 | 715.5518 | -134.696  | -0.02552 | 4102 | 716.1477 | -130.2646 | -0.03616 | 4102 | 719.142  | -129.7091 | -0.03836 | 4102 | 716.1118 | -127.869  | -0.0252  | 4102 | 716.3178 | -134.7453 | -0.02919 |
| 4103 | 715.7386 | -134.7586 | -0.02545 | 4103 | 716.322  | -130.3268 | -0.03619 | 4103 | 719.3366 | -129.7609 | -0.03847 | 4103 | 716.287  | -127.9371 | -0.02523 | 4103 | 716.4698 | -134.7986 | -0.02924 |
| 4104 | 715.894  | -134.8084 | -0.02545 | 4104 | 716.4957 | -130.3917 | -0.03612 | 4104 | 719.4811 | -129.8153 | -0.03855 | 4104 | 716.4688 | -128.0055 | -0.02516 | 4104 | 716.6308 | -134.8444 | -0.02916 |
| 4105 | 716.0469 | -134.866  | -0.02551 | 4105 | 716.6429 | -130.4536 | -0.03601 | 4105 | 719.652  | -129.8698 | -0.03846 | 4105 | 716.6217 | -128.0674 | -0.02514 | 4105 | 716.7875 | -134.8968 | -0.02913 |
| 4106 | 716.2105 | -134.9223 | -0.02552 | 4106 | 716.8035 | -130.5212 | -0.03613 | 4106 | 719.8    | -129.9302 | -0.03843 | 4106 | 716.7765 | -128.1339 | -0.02523 | 4106 | 716.9883 | -134.9404 | -0.02921 |
| 4107 | 716.4003 | -134.9834 | -0.02545 | 4107 | 716.9918 | -130.5841 | -0.03622 | 4107 | 720.0049 | -129.9803 | -0.03854 | 4107 | 716.9521 | -128.2006 | -0.02529 | 4107 | 717.1318 | -134.9868 | -0.02928 |
| 4108 | 716.5768 | -135.0376 | -0.02541 | 4108 | 717.1555 | -130.6483 | -0.03615 | 4108 | 720.1506 | -130.0482 | -0.03862 | 4108 | 717.1324 | -128.2677 | -0.02516 | 4108 | 717.3303 | -135.0301 | -0.02922 |
| 4109 | 716.7168 | -135.0983 | -0.02548 | 4109 | 717.3079 | -130.707  | -0.0361  | 4109 | 720.3237 | -130.104  | -0.03856 | 4109 | 717.2972 | -128.3265 | -0.02512 | 4109 | 717.4553 | -135.0797 | -0.02917 |
| 4110 | 716.8955 | -135.1586 | -0.0255  | 4110 | 717.4669 | -130.7744 | -0.03613 | 4110 | 720.4599 | -130.1647 | -0.03844 | 4110 | 717.4417 | -128.3898 | -0.02523 | 4110 | 717.6553 | -135.1242 | -0.02923 |
| 4111 | 717.0688 | -135.2252 | -0.02543 | 4111 | 717.6645 | -130.8367 | -0.0362  | 4111 | 720.6274 | -130.2286 | -0.03848 | 4111 | 717.624  | -128.453  | -0.02532 | 4111 | 717.8038 | -135.1692 | -0.0293  |
| 4112 | 717.2432 | -135.2867 | -0.02542 | 4112 | 717.8163 | -130.8986 | -0.03618 | 4112 | 720.8132 | -130.2811 | -0.03859 | 4112 | 717.7971 | -128.5169 | -0.02525 | 4112 | 717.9778 | -135.2139 | -0.02928 |
| 4113 | 717.382  | -135.3537 | -0.02548 | 4113 | 717.9789 | -130.9557 | -0.03604 | 4113 | 720.9814 | -130.3413 | -0.03853 | 4113 | 717.9698 | -128.5729 | -0.02517 | 4113 |          |           |          |

|      |          |           |          |      |          |           |          |      |          |           |          |      |          |           |          |      |          |           |          |
|------|----------|-----------|----------|------|----------|-----------|----------|------|----------|-----------|----------|------|----------|-----------|----------|------|----------|-----------|----------|
| 4175 | 727.7479 | -139.0312 | -0.02588 | 4175 | 728.327  | -134.3514 | -0.03655 | 4175 | 731.3034 | -133.7011 | -0.03938 | 4175 | 728.2939 | -132.3302 | -0.0259  | 4175 | 728.4651 | -138.5553 | -0.02943 |
| 4176 | 727.9301 | -139.0877 | -0.02592 | 4176 | 728.4819 | -134.4287 | -0.03645 | 4176 | 731.4641 | -133.7554 | -0.03929 | 4176 | 728.4365 | -132.3831 | -0.02585 | 4176 | 728.6684 | -138.6096 | -0.02939 |
| 4177 | 728.1057 | -139.1401 | -0.02591 | 4177 | 728.6802 | -134.4958 | -0.03651 | 4177 | 731.6553 | -133.8169 | -0.03916 | 4177 | 728.6405 | -132.4366 | -0.02594 | 4177 | 728.8041 | -138.6533 | -0.02946 |
| 4178 | 728.2838 | -139.1888 | -0.02584 | 4178 | 728.8236 | -134.5665 | -0.03646 | 4178 | 731.8161 | -133.8668 | -0.03927 | 4178 | 728.7917 | -132.4905 | -0.026   | 4178 | 728.9779 | -138.7079 | -0.02952 |
| 4179 | 728.42   | -139.2349 | -0.02584 | 4179 | 728.9938 | -134.6346 | -0.03655 | 4179 | 731.9708 | -133.9233 | -0.03935 | 4179 | 728.961  | -132.5445 | -0.02596 | 4179 | 729.1367 | -138.7591 | -0.02947 |
| 4180 | 728.5997 | -139.2897 | -0.02591 | 4180 | 729.1438 | -134.7075 | -0.03645 | 4180 | 732.1291 | -133.9704 | -0.03929 | 4180 | 729.0986 | -132.5962 | -0.02585 | 4180 | 729.3303 | -138.8153 | -0.02941 |
| 4181 | 728.7763 | -139.3393 | -0.02591 | 4181 | 729.3488 | -134.7738 | -0.03651 | 4181 | 732.3146 | -134.0277 | -0.03917 | 4181 | 729.3045 | -132.6601 | -0.02589 | 4181 | 729.4782 | -138.8644 | -0.02948 |
| 4182 | 728.9542 | -139.3874 | -0.02584 | 4182 | 729.4799 | -134.8385 | -0.03663 | 4182 | 732.4875 | -134.0698 | -0.03927 | 4182 | 729.4606 | -132.7156 | -0.02601 | 4182 | 729.6487 | -138.9204 | -0.02956 |
| 4183 | 729.0981 | -139.4282 | -0.02583 | 4183 | 729.6611 | -134.9067 | -0.03664 | 4183 | 732.634  | -134.1178 | -0.03935 | 4183 | 729.6268 | -132.7793 | -0.02596 | 4183 | 729.8031 | -138.9737 | -0.02955 |
| 4184 | 729.2628 | -139.4759 | -0.02591 | 4184 | 729.8048 | -134.974  | -0.03653 | 4184 | 732.8037 | -134.1585 | -0.0393  | 4184 | 729.7708 | -132.8381 | -0.02588 | 4184 | 729.9976 | -139.0322 | -0.02948 |
| 4185 | 729.4465 | -139.5237 | -0.02593 | 4185 | 730.0062 | -135.0444 | -0.03651 | 4185 | 732.9794 | -134.2063 | -0.03917 | 4185 | 729.9675 | -132.9065 | -0.02592 | 4185 | 730.1521 | -139.0807 | -0.02952 |
| 4186 | 729.6248 | -139.5735 | -0.02588 | 4186 | 730.1519 | -135.1078 | -0.0366  | 4186 | 733.1632 | -134.2455 | -0.03918 | 4186 | 730.1261 | -132.9656 | -0.02601 | 4186 | 730.3062 | -139.1364 | -0.02959 |
| 4187 | 729.7734 | -139.6163 | -0.02585 | 4187 | 730.3194 | -135.1807 | -0.03661 | 4187 | 733.3009 | -134.2914 | -0.03932 | 4187 | 730.2889 | -133.0295 | -0.02604 | 4187 | 730.474  | -139.1877 | -0.02957 |
| 4188 | 729.9362 | -139.6695 | -0.02591 | 4188 | 730.4667 | -135.2548 | -0.03651 | 4188 | 733.4709 | -134.3365 | -0.0393  | 4188 | 730.445  | -133.0877 | -0.02594 | 4188 | 730.6641 | -139.2423 | -0.0295  |
| 4189 | 730.1204 | -139.7263 | -0.02597 | 4189 | 730.6782 | -135.3372 | -0.03649 | 4189 | 733.6393 | -134.3915 | -0.03917 | 4189 | 730.6258 | -133.1552 | -0.02595 | 4189 | 730.8221 | -139.2857 | -0.0295  |
| 4190 | 730.2879 | -139.7843 | -0.02594 | 4190 | 730.8262 | -135.4099 | -0.03661 | 4190 | 733.8335 | -134.4418 | -0.03918 | 4190 | 730.799  | -133.2105 | -0.02609 | 4190 | 730.9697 | -139.3356 | -0.02959 |
| 4191 | 730.4496 | -139.837  | -0.02591 | 4191 | 730.9898 | -135.4912 | -0.03664 | 4191 | 733.965  | -134.4979 | -0.03929 | 4191 | 730.9593 | -133.2725 | -0.02613 | 4191 | 731.1447 | -139.3816 | -0.02959 |
| 4192 | 730.6115 | -139.8959 | -0.02595 | 4192 | 731.1425 | -135.5644 | -0.03654 | 4192 | 734.1415 | -134.5537 | -0.03933 | 4192 | 731.1138 | -133.3268 | -0.02605 | 4192 | 731.3202 | -139.4309 | -0.0295  |
| 4193 | 730.7927 | -139.9543 | -0.02601 | 4193 | 731.3377 | -135.6405 | -0.03652 | 4193 | 734.2989 | -134.6156 | -0.03921 | 4193 | 731.2921 | -133.3899 | -0.02606 | 4193 | 731.4972 | -139.4733 | -0.0295  |
| 4194 | 730.9683 | -140.0165 | -0.02594 | 4194 | 731.4957 | -135.7064 | -0.03669 | 4194 | 734.4953 | -134.6726 | -0.03912 | 4194 | 731.4714 | -133.4443 | -0.0262  | 4194 | 731.6384 | -139.5218 | -0.02959 |
| 4195 | 731.1343 | -140.0682 | -0.02587 | 4195 | 731.6559 | -135.7756 | -0.03679 | 4195 | 734.635  | -134.7288 | -0.03923 | 4195 | 731.6204 | -133.4998 | -0.02627 | 4195 | 731.807  | -139.5702 | -0.02961 |
| 4196 | 731.279  | -140.1226 | -0.02591 | 4196 | 731.8146 | -135.8374 | -0.03671 | 4196 | 734.8126 | -134.7885 | -0.03927 | 4196 | 731.7849 | -133.5493 | -0.02616 | 4196 | 731.9847 | -139.626  | -0.02954 |
| 4197 | 731.4656 | -140.1759 | -0.02596 | 4197 | 732.0002 | -135.9071 | -0.03666 | 4197 | 734.9629 | -134.8465 | -0.03918 | 4197 | 731.9491 | -133.6102 | -0.02615 | 4197 | 732.1699 | -139.6776 | -0.02953 |
| 4198 | 731.6425 | -140.2294 | -0.02592 | 4198 | 732.1689 | -135.9675 | -0.03675 | 4198 | 735.163  | -134.908  | -0.03908 | 4198 | 732.1372 | -133.662  | -0.02623 | 4198 | 732.3036 | -139.7312 | -0.02963 |
| 4199 | 731.8078 | -140.2733 | -0.02587 | 4199 | 732.3137 | -136.0325 | -0.03685 | 4199 | 735.3066 | -134.9607 | -0.03919 | 4199 | 732.2839 | -133.7159 | -0.0263  | 4199 | 732.4762 | -139.7837 | -0.02967 |
| 4200 | 731.9531 | -140.3203 | -0.02592 | 4200 | 732.4744 | -136.0952 | -0.03674 | 4200 | 735.4576 | -135.0214 | -0.03931 | 4200 | 732.4498 | -133.762  | -0.02625 | 4200 | 732.6459 | -139.8433 | -0.02962 |
| 4201 | 732.1445 | -140.3671 | -0.02602 | 4201 | 732.6616 | -136.1641 | -0.03666 | 4201 | 735.6276 | -135.0794 | -0.03925 | 4201 | 732.6108 | -133.8191 | -0.02617 | 4201 | 732.8336 | -139.8988 | -0.02957 |
| 4202 | 732.3076 | -140.4129 | -0.02602 | 4202 | 732.8351 | -136.2234 | -0.0367  | 4202 | 735.8276 | -135.1405 | -0.03915 | 4202 | 732.8091 | -133.8677 | -0.02626 | 4202 | 732.97   | -139.9527 | -0.02963 |
| 4203 | 732.4834 | -140.4559 | -0.02597 | 4203 | 732.9819 | -136.2928 | -0.03679 | 4203 | 735.9716 | -135.1945 | -0.03923 | 4203 | 732.9482 | -133.9178 | -0.02635 | 4203 | 733.1505 | -140.007  | -0.0297  |
| 4204 | 732.6267 | -140.499  | -0.02597 | 4204 | 733.1529 | -136.3568 | -0.03677 | 4204 | 736.1369 | -135.2552 | -0.03934 | 4204 | 733.1216 | -133.9661 | -0.0263  | 4204 | 733.3103 | -140.0638 | -0.02964 |
| 4205 | 732.808  | -140.5485 | -0.02606 | 4205 | 733.3168 | -136.4296 | -0.03667 | 4205 | 736.2922 | -135.3103 | -0.03924 | 4205 | 733.2765 | -134.0215 | -0.02623 | 4205 | 733.5073 | -140.1185 | -0.02959 |
| 4206 | 732.9835 | -140.5961 | -0.02606 | 4206 | 733.5076 | -136.4991 | -0.0367  | 4206 | 736.4813 | -135.372  | -0.03919 | 4206 | 733.4734 | -134.0704 | -0.02627 | 4206 | 733.6423 | -140.1665 | -0.02963 |
| 4207 | 733.1641 | -140.6441 | -0.02599 | 4207 | 733.6502 | -136.5699 | -0.03685 | 4207 | 736.645  | -135.4238 | -0.03927 | 4207 | 733.6144 | -134.1261 | -0.02635 | 4207 | 733.812  | -140.2211 | -0.02972 |
| 4208 | 733.296  | -140.6899 | -0.02598 | 4208 | 733.8167 | -136.6371 | -0.03683 | 4208 | 736.8035 | -135.4838 | -0.03945 | 4208 | 733.788  | -134.1802 | -0.0263  | 4208 | 733.9797 | -140.2748 | -0.02971 |
| 4209 | 733.4814 | -140.7483 | -0.02604 | 4209 | 733.9778 | -136.712  | -0.03673 | 4209 | 736.9648 | -135.5412 | -0.03953 | 4209 | 733.9349 | -134.2366 | -0.02621 | 4209 | 734.1716 | -140.3261 | -0.02963 |
| 4210 | 733.6535 | -140.8021 | -0.02605 | 4210 | 734.1738 | -136.7773 | -0.03673 | 4210 | 737.147  | -135.6029 | -0.03937 | 4210 | 734.1433 | -134.294  | -0.02619 | 4210 | 734.3147 | -140.3728 | -0.0297  |
| 4211 | 733.8242 | -140.8582 | -0.02597 | 4211 | 734.3077 | -136.8437 | -0.03682 | 4211 | 737.3142 | -135.6576 | -0.03938 | 4211 | 734.2836 | -134.3449 | -0.02623 | 4211 | 734.4797 | -140.4247 | -0.02978 |
| 4212 | 733.9661 | -140.9134 | -0.02594 | 4212 | 734.4842 | -136.9104 | -0.03686 | 4212 | 737.4562 | -135.7203 | -0.03952 | 4212 | 734.4529 | -134.4062 | -0.02631 | 4212 | 734.6242 | -140.4755 | -0.02977 |
| 4213 | 734.1437 | -140.9787 | -0.02602 | 4213 | 734.6395 | -136.9836 | -0.03676 | 4213 | 737.6269 | -135.7808 | -0.03953 | 4213 | 734.6    | -134.4631 | -0.02621 | 4213 | 734.8327 | -140.5293 | -0.02971 |
| 4214 | 734.3203 | -141.0319 | -0.02605 | 4214 | 734.8395 | -137.0504 | -0.03668 | 4214 | 737.8018 | -135.8483 | -0.03937 | 4214 | 734.8045 | -134.5242 | -0.02619 | 4214 | 734.9986 | -140.5771 | -0.02972 |
| 4215 | 734.489  | -141.0821 | -0.02601 | 4215 | 734.9752 | -137.1173 | -0.03677 | 4215 | 737.9813 | -135.9096 | -0.03927 | 4215 | 734.9461 | -134.5799 | -0.02628 | 4215 | 735.1469 | -140.631  | -0.02982 |
| 4216 | 734.642  | -141.1302 | -0.02598 | 4216 | 735.1517 | -137.1874 | -0.03683 | 4216 | 738.1237 | -135.9782 | -0.03946 | 4216 | 735.1182 | -134.6451 | -0.02631 | 4216 | 735.3201 | -140.6817 | -0.02983 |
| 4217 | 734.8065 | -141.193  | -0.02606 | 4217 | 735.3021 | -137.2575 | -0.03673 | 4217 | 738.2961 | -136.0404 | -0.03946 | 4217 | 735.273  | -134.7086 | -0.02621 | 4217 | 735.5048 | -140.7369 | -0.02976 |
| 4218 | 734.9864 | -141.2523 | -0.02611 | 4218 | 735.5031 | -137.3298 | -0.03665 | 4218 | 738.4628 | -136.1126 | -0.03937 | 4218 | 735.469  | -134.7778 | -0.02611 | 4218 | 735.6597 | -140.7842 | -0.02974 |
| 4219 | 735.1644 | -141.3114 | -0.02605 | 4219 | 735.645  | -137.3932 | -0.03674 | 4219 | 738.6327 | -136.1752 | -0.03931 | 4219 | 735.6246 | -134.8378 | -0.0262  | 4219 | 735.8097 | -140.8369 | -0.0298  |
| 4220 | 735.3236 | -141.3686 | -0.026   | 4220 | 735.813  | -137.4652 | -0.03684 | 4220 | 738.822  | -136.2356 | -0.03942 | 4220 | 735.7843 | -134.906  | -0.02626 | 4220 | 735.9832 | -140.8895 | -0.02985 |
| 4221 | 735.4818 | -141.4254 | -0.02606 | 4221 | 735.9673 | -137.5366 | -0.03682 | 4221 | 738.9579 | -136.2961 | -0.03953 | 4221 | 735.9381 | -134.9691 | -0.02619 | 4221 | 736.1609 | -140.9431 | -0.02978 |
| 4222 | 735.6703 | -141.4922 | -0.02613 | 4222 | 736.164  | -137.6102 | -0.03674 | 4222 | 739.1223 | -136.3577 | -0.03941 | 4222 | 736.1304 | -135.0374 | -0.02614 | 4222 | 736.3311 | -140.9913 | -0.02972 |
| 4223 | 735.8332 | -141.539  | -0.02613 | 4223 | 736.3079 | -137.6784 | -0.03683 | 4223 | 739.3102 | -136.4151 | -0.03942 | 4223 | 736.2927 | -135.0918 | -0.02623 | 4223 | 736.4784 | -141.0446 | -0.02981 |
| 4224 | 735.9984 | -141.5744 | -0.02608 | 4224 | 736.471  | -137.7578 | -0.03692 | 4224 | 739.4458 | -136.4692 | -0.03946 | 4224 | 736.4423 | -135.1577 | -0.02632 | 4224 | 736.6508 | -141.0974 | -0.02985 |
| 4225 | 736.1442 | -141.6098 | -0.02612 | 4225 | 736.6314 | -137.8298 | -0.03688 | 4225 | 739.6297 | -136.5299 | -0.03947 | 4225 | 736.6048 | -135.2161 | -0.02627 | 4225 | 736.8257 | -141.154  | -0.02978 |
| 4226 | 736.3373 | -141.6446 | -0.02621 | 4226 | 736.8196 | -137.9081 | -0.0368  | 4226 | 739.7869 | -136.5884 | -0.03938 | 4226 | 736.7938 | -135.2844 |          |      |          |           |          |

|      |          |           |          |      |          |           |          |      |          |           |          |      |          |           |          |      |          |           |          |
|------|----------|-----------|----------|------|----------|-----------|----------|------|----------|-----------|----------|------|----------|-----------|----------|------|----------|-----------|----------|
| 4288 | 746.6992 | -145.1139 | -0.02636 | 4288 | 747.1515 | -141.5495 | -0.03699 | 4288 | 750.1168 | -140.1565 | -0.03988 | 4288 | 747.1295 | -138.555  | -0.02695 | 4288 | 747.2976 | -144.8523 | -0.03006 |
| 4289 | 746.8522 | -145.1744 | -0.02642 | 4289 | 747.3046 | -141.5969 | -0.03691 | 4289 | 750.2955 | -140.2184 | -0.03979 | 4289 | 747.2955 | -138.6049 | -0.02688 | 4289 | 747.4399 | -144.9068 | -0.03002 |
| 4290 | 747.0165 | -145.2333 | -0.02637 | 4290 | 747.4538 | -141.6533 | -0.03701 | 4290 | 750.439  | -140.2182 | -0.03973 | 4290 | 747.443  | -138.6636 | -0.02694 | 4290 | 747.6322 | -144.9641 | -0.03009 |
| 4291 | 747.1658 | -145.2954 | -0.02632 | 4291 | 747.6419 | -141.7096 | -0.0371  | 4291 | 750.6001 | -140.3362 | -0.03985 | 4291 | 747.6321 | -138.7236 | -0.02706 | 4291 | 747.7906 | -145.0149 | -0.03013 |
| 4292 | 747.3259 | -145.356  | -0.0264  | 4292 | 747.8163 | -141.7669 | -0.03702 | 4292 | 750.7939 | -140.3942 | -0.03992 | 4292 | 747.8029 | -138.7837 | -0.02701 | 4292 | 747.9617 | -145.067  | -0.03008 |
| 4293 | 747.5169 | -145.4129 | -0.02644 | 4293 | 747.9712 | -141.8191 | -0.03697 | 4293 | 750.9599 | -140.4577 | -0.03983 | 4293 | 747.9628 | -138.8393 | -0.02693 | 4293 | 748.1015 | -145.1168 | -0.03005 |
| 4294 | 747.6917 | -145.475  | -0.02639 | 4294 | 748.127  | -141.8745 | -0.03707 | 4294 | 751.1123 | -140.5171 | -0.0397  | 4294 | 748.1083 | -138.8996 | -0.027   | 4294 | 748.2907 | -145.1773 | -0.03011 |
| 4295 | 747.833  | -145.5354 | -0.02632 | 4295 | 748.3119 | -141.9312 | -0.03713 | 4295 | 751.2688 | -140.5851 | -0.03974 | 4295 | 748.2979 | -138.9653 | -0.02708 | 4295 | 748.4596 | -145.2279 | -0.03016 |
| 4296 | 748.0396 | -145.6012 | -0.02636 | 4296 | 748.4771 | -141.9863 | -0.03711 | 4296 | 751.4558 | -140.6527 | -0.03986 | 4296 | 748.4625 | -139.0287 | -0.02712 | 4296 | 748.6269 | -145.2835 | -0.03014 |
| 4297 | 748.1947 | -145.6564 | -0.02647 | 4297 | 748.642  | -142.0348 | -0.03703 | 4297 | 751.6199 | -140.7224 | -0.0398  | 4297 | 748.6362 | -139.0885 | -0.02705 | 4297 | 748.7679 | -145.3323 | -0.03011 |
| 4298 | 748.3609 | -145.7067 | -0.02641 | 4298 | 748.7882 | -142.0886 | -0.0371  | 4298 | 751.7846 | -140.7874 | -0.0397  | 4298 | 748.7747 | -139.1515 | -0.02705 | 4298 | 748.9506 | -145.3952 | -0.03019 |
| 4299 | 748.5081 | -145.7517 | -0.02634 | 4299 | 748.9744 | -142.1447 | -0.03722 | 4299 | 751.9279 | -140.8558 | -0.03978 | 4299 | 748.9609 | -139.2191 | -0.0272  | 4299 | 749.1303 | -145.4458 | -0.03026 |
| 4300 | 748.7103 | -145.8068 | -0.02636 | 4300 | 749.1484 | -142.202  | -0.0372  | 4300 | 752.1215 | -140.9264 | -0.03989 | 4300 | 749.1265 | -139.2817 | -0.0272  | 4300 | 749.2871 | -145.5021 | -0.03024 |
| 4301 | 748.8732 | -145.8524 | -0.02644 | 4301 | 749.3238 | -142.2535 | -0.03706 | 4301 | 752.2903 | -140.9981 | -0.03994 | 4301 | 749.297  | -139.3403 | -0.02716 | 4301 | 749.4401 | -145.5545 | -0.03019 |
| 4302 | 749.0374 | -145.8983 | -0.02649 | 4302 | 749.4603 | -142.3078 | -0.03713 | 4302 | 752.452  | -141.059  | -0.03981 | 4302 | 749.4343 | -139.396  | -0.02711 | 4302 | 749.6115 | -145.6169 | -0.03023 |
| 4303 | 749.1909 | -145.9398 | -0.02642 | 4303 | 749.6497 | -142.368  | -0.03722 | 4303 | 752.5965 | -141.1237 | -0.03978 | 4303 | 749.6244 | -139.461  | -0.02717 | 4303 | 749.7924 | -145.6728 | -0.03032 |
| 4304 | 749.3767 | -145.9953 | -0.02642 | 4304 | 749.8148 | -142.4228 | -0.0372  | 4304 | 752.7873 | -141.189  | -0.03993 | 4304 | 749.7947 | -139.5187 | -0.02723 | 4304 | 749.9533 | -145.7332 | -0.03028 |
| 4305 | 749.5516 | -146.0393 | -0.02652 | 4305 | 749.9885 | -142.4792 | -0.03707 | 4305 | 752.9534 | -141.2521 | -0.03994 | 4305 | 749.9611 | -139.5786 | -0.02716 | 4305 | 750.1086 | -145.7867 | -0.03023 |
| 4306 | 749.7097 | -146.0859 | -0.02655 | 4306 | 750.1327 | -142.5345 | -0.03705 | 4306 | 753.1263 | -141.3092 | -0.03978 | 4306 | 750.1074 | -139.6342 | -0.02714 | 4306 | 750.2722 | -145.8503 | -0.03024 |
| 4307 | 749.8608 | -146.1225 | -0.02649 | 4307 | 750.3101 | -142.5942 | -0.03714 | 4307 | 753.2623 | -141.3632 | -0.03975 | 4307 | 750.2894 | -139.7052 | -0.02723 | 4307 | 750.4713 | -145.907  | -0.03032 |
| 4308 | 750.0366 | -146.1721 | -0.02646 | 4308 | 750.4819 | -142.6488 | -0.03714 | 4308 | 753.4473 | -141.4273 | -0.03987 | 4308 | 750.4602 | -139.7693 | -0.02729 | 4308 | 750.6223 | -145.9645 | -0.03033 |
| 4309 | 750.2257 | -146.2155 | -0.02652 | 4309 | 750.6583 | -142.7049 | -0.03701 | 4309 | 753.6165 | -141.4845 | -0.03991 | 4309 | 750.6268 | -139.8389 | -0.02724 | 4309 | 750.7793 | -146.0169 | -0.03025 |
| 4310 | 750.3727 | -146.2601 | -0.02655 | 4310 | 750.7982 | -142.7586 | -0.03696 | 4310 | 753.7928 | -141.5441 | -0.03978 | 4310 | 750.7785 | -139.9042 | -0.02717 | 4310 | 750.9301 | -146.0775 | -0.03024 |
| 4311 | 750.5394 | -146.3063 | -0.0265  | 4311 | 750.9785 | -142.8217 | -0.03706 | 4311 | 753.931  | -141.597  | -0.03969 | 4311 | 750.9427 | -139.9805 | -0.02723 | 4311 | 751.1272 | -146.134  | -0.0303  |
| 4312 | 750.7069 | -146.364  | -0.02647 | 4312 | 751.1588 | -142.8775 | -0.03712 | 4312 | 754.1097 | -141.6653 | -0.03987 | 4312 | 751.132  | -140.0502 | -0.02732 | 4312 | 751.2809 | -146.1926 | -0.03033 |
| 4313 | 750.8982 | -146.4142 | -0.02655 | 4313 | 751.3209 | -142.9375 | -0.03702 | 4313 | 754.2848 | -141.7174 | -0.03994 | 4313 | 751.2946 | -140.1189 | -0.02727 | 4313 | 751.4482 | -146.2471 | -0.03025 |
| 4314 | 751.0488 | -146.4712 | -0.02659 | 4314 | 751.4691 | -142.9968 | -0.03697 | 4314 | 754.4506 | -141.7734 | -0.03985 | 4314 | 751.452  | -140.1798 | -0.02717 | 4314 | 751.5932 | -146.3095 | -0.0302  |
| 4315 | 751.2213 | -146.5249 | -0.02652 | 4315 | 751.6446 | -143.0637 | -0.03709 | 4315 | 754.5983 | -141.8232 | -0.03979 | 4315 | 751.6201 | -140.2453 | -0.02723 | 4315 | 751.7958 | -146.3707 | -0.03026 |
| 4316 | 751.3741 | -146.5869 | -0.02649 | 4316 | 751.8243 | -143.1253 | -0.03718 | 4316 | 754.7723 | -141.8812 | -0.03987 | 4316 | 751.8074 | -140.2959 | -0.02735 | 4316 | 751.9462 | -146.4305 | -0.03031 |
| 4317 | 751.575  | -146.6421 | -0.02655 | 4317 | 751.9904 | -143.1894 | -0.03716 | 4317 | 754.9508 | -141.9309 | -0.03995 | 4317 | 751.9627 | -140.3489 | -0.02738 | 4317 | 752.1165 | -146.4899 | -0.03026 |
| 4318 | 751.7235 | -146.6978 | -0.02661 | 4318 | 752.1461 | -143.2459 | -0.03708 | 4318 | 755.1151 | -141.9852 | -0.03986 | 4318 | 752.1239 | -140.3911 | -0.02731 | 4318 | 752.2525 | -146.5542 | -0.03022 |
| 4319 | 751.8924 | -146.7513 | -0.02656 | 4319 | 752.3028 | -143.3099 | -0.03717 | 4319 | 755.2673 | -142.0327 | -0.03969 | 4319 | 752.2778 | -140.4348 | -0.02734 | 4319 | 752.4605 | -146.6211 | -0.03029 |
| 4320 | 752.0465 | -146.8081 | -0.02649 | 4320 | 752.4956 | -143.3696 | -0.0372  | 4320 | 755.4286 | -142.0927 | -0.0397  | 4320 | 752.4736 | -140.4742 | -0.02746 | 4320 | 752.6111 | -146.6845 | -0.03035 |
| 4321 | 752.2482 | -146.8558 | -0.02653 | 4321 | 752.66   | -143.4299 | -0.03728 | 4321 | 755.6209 | -142.1514 | -0.03985 | 4321 | 752.6302 | -140.5172 | -0.02749 | 4321 | 752.7759 | -146.7495 | -0.03032 |
| 4322 | 752.3901 | -146.9055 | -0.02661 | 4322 | 752.8121 | -143.4837 | -0.03717 | 4322 | 755.7788 | -142.2125 | -0.03983 | 4322 | 752.7943 | -140.5569 | -0.02742 | 4322 | 752.9199 | -146.8121 | -0.03024 |
| 4323 | 752.5676 | -146.9543 | -0.0266  | 4323 | 752.9686 | -143.5427 | -0.03721 | 4323 | 755.9399 | -142.2734 | -0.03973 | 4323 | 752.9357 | -140.6042 | -0.0274  | 4323 | 753.1222 | -146.883  | -0.03031 |
| 4324 | 752.7112 | -147.0053 | -0.02651 | 4324 | 753.162  | -143.6023 | -0.0373  | 4324 | 756.0903 | -142.3425 | -0.03974 | 4324 | 753.1403 | -140.642  | -0.02749 | 4324 | 753.2764 | -146.9428 | -0.03037 |
| 4325 | 752.9237 | -147.0593 | -0.02651 | 4325 | 753.3208 | -143.6621 | -0.03728 | 4325 | 756.2914 | -142.4074 | -0.03992 | 4325 | 753.2853 | -140.6778 | -0.02752 | 4325 | 753.4467 | -147.0074 | -0.03034 |
| 4326 | 753.0687 | -147.1091 | -0.02658 | 4326 | 753.4878 | -143.7157 | -0.03717 | 4326 | 756.445  | -142.4735 | -0.03997 | 4326 | 753.454  | -140.7176 | -0.02739 | 4326 | 753.5901 | -147.0626 | -0.03026 |
| 4327 | 753.2416 | -147.1659 | -0.02658 | 4327 | 753.6404 | -143.774  | -0.03718 | 4327 | 756.6096 | -142.5333 | -0.0398  | 4327 | 753.6006 | -140.7594 | -0.02735 | 4327 | 753.7851 | -147.1313 | -0.03029 |
| 4328 | 753.3863 | -147.219  | -0.02649 | 4328 | 753.829  | -143.8349 | -0.03727 | 4328 | 756.752  | -142.5977 | -0.03981 | 4328 | 753.8005 | -140.8058 | -0.02744 | 4328 | 753.949  | -147.1885 | -0.03035 |
| 4329 | 753.593  | -147.277  | -0.0265  | 4329 | 753.9926 | -143.8949 | -0.03728 | 4329 | 756.9555 | -142.6599 | -0.03993 | 4329 | 753.9503 | -140.8575 | -0.02747 | 4329 | 754.1119 | -147.2463 | -0.03034 |
| 4330 | 753.7391 | -147.3222 | -0.02658 | 4330 | 754.1558 | -143.952  | -0.03714 | 4330 | 757.1125 | -142.7208 | -0.03997 | 4330 | 754.1252 | -140.9122 | -0.02737 | 4330 | 754.2617 | -147.3002 | -0.03029 |
| 4331 | 753.9073 | -147.3742 | -0.0266  | 4331 | 754.2943 | -144.014  | -0.03715 | 4331 | 757.2754 | -142.7706 | -0.03984 | 4331 | 754.2614 | -140.9764 | -0.02732 | 4331 | 754.4506 | -147.3651 | -0.03027 |
| 4332 | 754.0555 | -147.4187 | -0.02653 | 4332 | 754.4934 | -144.0775 | -0.03727 | 4332 | 757.4199 | -142.8363 | -0.03975 | 4332 | 754.4695 | -141.0514 | -0.02741 | 4332 | 754.6205 | -147.4155 | -0.03036 |
| 4333 | 754.2528 | -147.4697 | -0.02648 | 4333 | 754.6528 | -144.1415 | -0.03734 | 4333 | 757.6205 | -142.8972 | -0.03986 | 4333 | 754.6202 | -141.1199 | -0.02743 | 4333 | 754.7733 | -147.4723 | -0.03038 |
| 4334 | 754.4122 | -147.5077 | -0.02654 | 4334 | 754.8201 | -144.2022 | -0.03726 | 4334 | 757.7706 | -142.954  | -0.0399  | 4334 | 754.7846 | -141.1932 | -0.0274  | 4334 | 754.9322 | -147.5206 | -0.03029 |
| 4335 | 754.5709 | -147.5596 | -0.02657 | 4335 | 754.9625 | -144.263  | -0.03724 | 4335 | 757.9401 | -143.0113 | -0.03977 | 4335 | 754.9272 | -141.2604 | -0.02743 | 4335 | 755.1004 | -147.5791 | -0.03028 |
| 4336 | 754.7259 | -147.6081 | -0.02651 | 4336 | 755.1641 | -144.3307 | -0.03736 | 4336 | 758.0805 | -143.0689 | -0.03968 | 4336 | 755.1216 | -141.3382 | -0.02731 | 4336 | 755.2876 | -147.6294 | -0.03036 |
| 4337 | 754.9133 | -147.6702 | -0.02648 | 4337 | 755.3182 | -144.3918 | -0.03745 | 4337 | 758.2796 | -143.133  | -0.03979 | 4337 | 755.2797 | -141.4079 | -0.0274  | 4337 | 755.4404 | -147.685  | -0.03038 |
| 4338 | 755.0905 | -147.7255 | -0.02652 | 4338 | 755.4931 | -144.4527 | -0.03738 | 4338 | 758.4452 | -143.191  | -0.0399  | 4338 | 755.4502 | -141.4801 | -0.02729 | 4338 | 755.6002 | -147.735  | -0.03033 |
| 4339 | 755.2383 | -147.7874 | -0.02659 | 4339 | 755.6301 | -144.505  | -0.03733 | 4339 | 758.6131 | -143.248  | -0.03988 | 4339 | 755.6013 | -141.5437 | -0.      |      |          |           |          |

|      |          |           |          |      |          |           |          |      |          |           |          |      |          |           |          |        |          |           |          |
|------|----------|-----------|----------|------|----------|-----------|----------|------|----------|-----------|----------|------|----------|-----------|----------|--------|----------|-----------|----------|
| 4401 | 765.6162 | -150.8969 | -0.02672 | 4401 | 765.9595 | -147.7996 | -0.03755 | 4401 | 768.9321 | -146.5837 | -0.04056 | 4401 | 765.9242 | -145.141  | -0.0277  | 4401   | 766.0928 | -151.01   | -0.03059 |
| 4402 | 765.7855 | -150.9316 | -0.02675 | 4402 | 766.1711 | -147.8521 | -0.03756 | 4402 | 769.0857 | -146.6284 | -0.04043 | 4402 | 766.1224 | -145.1929 | -0.02758 | 4402   | 766.2595 | -151.0491 | -0.03057 |
| 4403 | 765.9721 | -150.9687 | -0.02669 | 4403 | 766.3107 | -147.8992 | -0.03768 | 4403 | 769.2898 | -146.6808 | -0.04037 | 4403 | 766.2604 | -145.2349 | -0.02761 | 4403   | 766.3979 | -151.0975 | -0.03062 |
| 4404 | 766.1399 | -150.9925 | -0.0267  | 4404 | 766.4798 | -147.9507 | -0.03771 | 4404 | 769.4399 | -146.7206 | -0.04055 | 4404 | 766.4224 | -145.283  | -0.02775 | 4404   | 766.5734 | -151.1459 | -0.03067 |
| 4405 | 766.2888 | -151.0159 | -0.02678 | 4405 | 766.6365 | -148.005  | -0.03764 | 4405 | 769.6003 | -146.7708 | -0.0406  | 4405 | 766.5889 | -145.33   | -0.02776 | 4405   | 766.7574 | -151.1946 | -0.03063 |
| 4406 | 766.46   | -151.0371 | -0.0268  | 4406 | 766.8366 | -148.061  | -0.03765 | 4406 | 769.7511 | -146.8156 | -0.0405  | 4406 | 766.777  | -145.3761 | -0.02766 | 4406   | 766.9263 | -151.2365 | -0.0306  |
| 4407 | 766.636  | -151.0629 | -0.02675 | 4407 | 766.9772 | -148.1097 | -0.03774 | 4407 | 769.9419 | -146.8669 | -0.04041 | 4407 | 766.9294 | -145.4168 | -0.02767 | 4407   | 767.0667 | -151.2829 | -0.03066 |
| 4408 | 766.8122 | -151.0841 | -0.02672 | 4408 | 767.1508 | -148.169  | -0.0378  | 4408 | 770.1045 | -146.9089 | -0.04052 | 4408 | 767.0888 | -145.4702 | -0.02778 | 4408   | 767.2057 | -151.3254 | -0.03071 |
| 4409 | 766.9542 | -151.1097 | -0.02678 | 4409 | 767.3009 | -148.2211 | -0.03775 | 4409 | 770.2608 | -146.9599 | -0.04063 | 4409 | 767.2607 | -145.5162 | -0.02779 | 4409   | 767.4052 | -151.3741 | -0.03067 |
| 4410 | 767.1357 | -151.1379 | -0.02679 | 4410 | 767.4965 | -148.2764 | -0.03777 | 4410 | 770.4233 | -147.0035 | -0.04057 | 4410 | 767.4427 | -145.5679 | -0.02769 | 4410   | 767.592  | -151.4177 | -0.03064 |
| 4411 | 767.3064 | -151.1763 | -0.02672 | 4411 | 767.6498 | -148.3212 | -0.03777 | 4411 | 770.6108 | -147.0605 | -0.04045 | 4411 | 767.6045 | -145.612  | -0.02764 | 4411   | 767.7271 | -151.4636 | -0.0307  |
| 4412 | 767.4887 | -151.2114 | -0.02666 | 4412 | 767.8067 | -148.3736 | -0.03783 | 4412 | 770.7871 | -147.1036 | -0.04052 | 4412 | 767.7524 | -145.6643 | -0.02776 | 4412   | 767.9044 | -151.5101 | -0.03075 |
| 4413 | 767.6221 | -151.2557 | -0.02671 | 4413 | 767.9605 | -148.4195 | -0.03778 | 4413 | 770.9274 | -147.154  | -0.04067 | 4413 | 767.9235 | -145.7146 | -0.02782 | 4413   | 768.0743 | -151.562  | -0.03072 |
| 4414 | 767.7988 | -151.3    | -0.02677 | 4414 | 768.1527 | -148.472  | -0.03774 | 4414 | 771.1014 | -147.2004 | -0.04068 | 4414 | 768.1061 | -145.7666 | -0.02772 | 4414   | 768.2558 | -151.6104 | -0.03064 |
| 4415 | 767.9681 | -151.3498 | -0.02674 | 4415 | 768.3168 | -148.5145 | -0.03774 | 4415 | 771.2793 | -147.253  | -0.04055 | 4415 | 768.2676 | -145.8123 | -0.0277  | 4415   | 768.3872 | -151.659  | -0.03071 |
| 4416 | 768.154  | -151.3941 | -0.02666 | 4416 | 768.4643 | -148.5691 | -0.03783 | 4416 | 771.4601 | -147.295  | -0.04056 | 4416 | 768.413  | -145.8653 | -0.02781 | 4416   | 768.5693 | -151.7116 | -0.03077 |
| 4417 | 768.2935 | -151.4427 | -0.02673 | 4417 | 768.6353 | -148.6233 | -0.03781 | 4417 | 771.6008 | -147.3394 | -0.04071 | 4417 | 768.5939 | -145.9154 | -0.0279  | 4417   | 768.7339 | -151.7613 | -0.03076 |
| 4418 | 768.4687 | -151.497  | -0.02681 | 4418 | 768.8161 | -148.6837 | -0.03771 | 4418 | 771.7736 | -147.3794 | -0.04078 | 4418 | 768.7645 | -145.9638 | -0.02783 | 4418   | 768.9213 | -151.8095 | -0.03068 |
| 4419 | 768.637  | -151.5533 | -0.02678 | 4419 | 768.9899 | -148.7356 | -0.03775 | 4419 | 771.9359 | -147.4266 | -0.04066 | 4419 | 768.9377 | -146.008  | -0.02776 | 4419   | 769.0623 | -151.8475 | -0.03071 |
| 4420 | 768.8292 | -151.6094 | -0.02674 | 4420 | 769.1375 | -148.7965 | -0.03784 | 4420 | 772.1    | -147.4671 | -0.04063 | 4420 | 769.0798 | -146.0561 | -0.02779 | 4420   | 769.233  | -151.89   | -0.03079 |
| 4421 | 768.9666 | -151.6616 | -0.02679 | 4421 | 769.3013 | -148.8483 | -0.03784 | 4421 | 772.2621 | -147.5089 | -0.04074 | 4421 | 769.2584 | -146.104  | -0.02785 | 4421   | 769.4064 | -151.9308 | -0.03078 |
| 4422 | 769.1497 | -151.7214 | -0.02685 | 4422 | 769.4824 | -148.9061 | -0.03777 | 4422 | 772.4363 | -147.5507 | -0.04082 | 4422 | 769.4334 | -146.1521 | -0.02781 | 4422   | 769.5958 | -151.969  | -0.0307  |
| 4423 | 769.3181 | -151.7733 | -0.02685 | 4423 | 769.6664 | -148.9544 | -0.03775 | 4423 | 772.596  | -147.5982 | -0.0407  | 4423 | 769.6111 | -146.1943 | -0.02768 | 4423   | 769.7383 | -151.9997 | -0.03069 |
| 4424 | 769.5064 | -151.8265 | -0.0268  | 4424 | 769.8035 | -149.0053 | -0.03784 | 4424 | 772.7983 | -147.6424 | -0.04063 | 4424 | 769.7473 | -146.2418 | -0.02771 | 4424   | 769.9068 | -152.0398 | -0.03078 |
| 4425 | 769.6461 | -151.8715 | -0.02685 | 4425 | 769.9758 | -149.0501 | -0.03785 | 4425 | 772.9259 | -147.6847 | -0.04075 | 4425 | 769.9367 | -146.2908 | -0.02778 | 4425   | 770.0855 | -152.0765 | -0.03078 |
| 4426 | 769.8214 | -151.9161 | -0.02693 | 4426 | 770.1493 | -149.1012 | -0.03772 | 4426 | 773.11   | -147.7262 | -0.04086 | 4426 | 770.1068 | -146.3369 | -0.02778 | 4426   | 770.2598 | -152.1145 | -0.03071 |
| 4427 | 769.985  | -151.9578 | -0.02695 | 4427 | 770.3322 | -149.1408 | -0.03766 | 4427 | 773.2651 | -147.7633 | -0.04077 | 4427 | 770.2828 | -146.3812 | -0.02765 | 4427   | 770.4198 | -152.1416 | -0.03067 |
| 4428 | 770.1741 | -151.9977 | -0.0269  | 4428 | 770.4742 | -149.1834 | -0.03773 | 4428 | 773.4669 | -147.7987 | -0.04071 | 4428 | 770.4236 | -146.4245 | -0.02766 | 4428   | 770.5709 | -152.1738 | -0.03074 |
| 4429 | 770.3215 | -152.0305 | -0.02689 | 4429 | 770.6516 | -149.2204 | -0.03773 | 4429 | 773.6025 | -147.8255 | -0.04082 | 4429 | 770.6044 | -146.4736 | -0.02772 | 4429   | 770.7508 | -152.2038 | -0.03076 |
| 4430 | 770.4814 | -152.0712 | -0.02695 | 4430 | 770.814  | -149.2606 | -0.03766 | 4430 | 773.7477 | -147.8557 | -0.04093 | 4430 | 770.7743 | -146.5178 | -0.0277  | 4430   | 770.9306 | -152.2333 | -0.03069 |
| 4431 | 770.6575 | -152.1095 | -0.02697 | 4431 | 771.0145 | -149.2957 | -0.03761 | 4431 | 773.9288 | -147.8864 | -0.04084 | 4431 | 770.9564 | -146.5619 | -0.0276  | 4431   | 771.0927 | -152.2516 | -0.03063 |
| 4432 | 770.8454 | -152.1543 | -0.0269  | 4432 | 771.1481 | -149.3322 | -0.0377  | 4432 | 774.1252 | -147.9235 | -0.04071 | 4432 | 771.0958 | -146.6017 | -0.02755 | 4432   | 771.2413 | -152.2804 | -0.0307  |
| 4433 | 771.0075 | -152.1952 | -0.02687 | 4433 | 771.3261 | -149.3599 | -0.0378  | 4433 | 774.2684 | -147.9528 | -0.04079 | 4433 | 771.263  | -146.6498 | -0.02767 | 4433   | 771.4268 | -152.309  | -0.03074 |
| 4434 | 771.168  | -152.2375 | -0.02693 | 4434 | 771.4934 | -149.3938 | -0.03772 | 4434 | 774.4318 | -147.9951 | -0.0409  | 4434 | 771.4437 | -146.6959 | -0.02768 | 4434   | 771.6016 | -152.3412 | -0.03071 |
| 4435 | 771.3516 | -152.2739 | -0.02698 | 4435 | 771.6927 | -149.4264 | -0.03759 | 4435 | 774.599  | -148.0387 | -0.04087 | 4435 | 771.6185 | -146.7412 | -0.0276  | 4435   | 771.7672 | -152.3691 | -0.03067 |
| 4436 | 771.5254 | -152.3074 | -0.02693 | 4436 | 771.8239 | -149.4515 | -0.03765 | 4436 | 774.7846 | -148.0849 | -0.04078 | 4436 | 771.7592 | -146.7808 | -0.02755 | 4436   | 771.9126 | -152.4019 | -0.03072 |
| 4437 | 771.6934 | -152.3284 | -0.02687 | 4437 | 771.9949 | -149.4824 | -0.03771 | 4437 | 774.9376 | -148.1233 | -0.04086 | 4437 | 771.934  | -146.8304 | -0.02767 | 4437   | 772.0975 | -152.4375 | -0.03075 |
| 4438 | 771.8388 | -152.3501 | -0.02693 | 4438 | 772.1594 | -149.5131 | -0.03767 | 4438 | 775.1022 | -148.1694 | -0.041   | 4438 | 772.1108 | -146.8686 | -0.02773 | 4438   | 772.2675 | -152.4724 | -0.03077 |
| 4439 | 772.0205 | -152.3664 | -0.02698 | 4439 | 772.3502 | -149.5435 | -0.03759 | 4439 | 775.2612 | -148.2138 | -0.04102 | 4439 | 772.2831 | -146.907  | -0.02766 | 4439   | 772.4421 | -152.5011 | -0.03068 |
| 4440 | 772.2015 | -152.3848 | -0.02693 | 4440 | 772.4926 | -149.5688 | -0.03765 | 4440 | 775.4515 | -148.263  | -0.04089 | 4440 | 772.4353 | -146.9386 | -0.02761 | 4440   | 772.5818 | -152.5359 | -0.03072 |
| 4441 | 772.372  | -152.396  | -0.02689 | 4441 | 772.6614 | -149.6029 | -0.03777 | 4441 | 775.6159 | -148.3015 | -0.0409  | 4441 | 772.5917 | -146.974  | -0.02776 | 4441   | 772.7674 | -152.5714 | -0.03079 |
| 4442 | 772.512  | -152.4159 | -0.02696 | 4442 | 772.8263 | -149.6351 | -0.03781 | 4442 | 775.7651 | -148.3456 | -0.04104 | 4442 | 772.7766 | -147.0113 | -0.02784 | 4442   | 772.9414 | -152.6065 | -0.03077 |
| 4443 | 772.6999 | -152.4386 | -0.027   | 4443 | 773.0131 | -149.6713 | -0.03773 | 4443 | 775.9381 | -148.3894 | -0.04109 | 4443 | 772.9475 | -147.0532 | -0.02777 | 4443   | 773.1141 | -152.6333 | -0.0307  |
| 4444 | 772.8699 | -152.4589 | -0.02697 | 4444 | 773.1693 | -149.7002 | -0.03774 | 4444 | 776.1143 | -148.4355 | -0.04096 | 4444 | 773.0974 | -147.0899 | -0.02772 | 4444   | 773.2456 | -152.6556 | -0.03072 |
| 4445 | 773.049  | -152.4776 | -0.02691 | 4445 | 773.3205 | -149.7393 | -0.03786 | 4445 | 776.2933 | -148.466  | -0.04093 | 4445 | 773.2517 | -147.1355 | -0.02778 | 4445   | 773.4327 | -152.6839 | -0.03079 |
| 4446 | 773.1971 | -152.4985 | -0.02694 | 4446 | 773.494  | -149.7768 | -0.03787 | 4446 | 776.4739 | -148.5082 | -0.04108 | 4446 | 773.4422 | -147.1846 | -0.02787 | 4446   | 773.6013 | -152.7051 | -0.03078 |
| 4447 | 773.3807 | -152.52   | -0.02702 | 4447 | 773.6762 | -149.8184 | -0.03776 | 4447 | 776.6165 | -148.5411 | -0.04116 | 4447 | 773.603  | -147.231  | -0.02783 | 4447   | 773.7748 | -152.7241 | -0.03072 |
| 4448 | 773.5518 | -152.5411 | -0.02701 | 4448 | 773.835  | -149.8582 | -0.03774 | 4448 | 776.7831 | -148.5765 | -0.04106 | 4448 | 773.7692 | -147.2731 | -0.02775 | 4448   | 773.9133 | -152.7389 | -0.03071 |
| 4449 | 773.7334 | -152.5614 | -0.02696 | 4449 | 773.9866 | -149.9064 | -0.03783 | 4449 | 776.9657 | -148.6027 | -0.04097 | 4449 | 773.9222 | -147.3172 | -0.02779 | 4449   | 774.0897 | -152.7655 | -0.03081 |
| 4450 | 773.8683 | -152.5771 | -0.02694 | 4450 | 774.1603 | -149.9584 | -0.03787 | 4450 | 777.1055 | -148.6311 | -0.04112 | 4450 | 774.1103 | -147.3605 | -0.02788 | 4450   | 774.2648 | -152.7945 | -0.03084 |
| 4451 | 774.0471 | -152.6041 | -0.02702 | 4451 | 774.3351 | -150.014  | -0.03771 | 4451 | 777.2475 | -148.6546 | -0.04116 | 4451 | 774.2784 | -147.4095 | -0.02789 | 4451   | 774.4441 | -152.8315 | -0.03078 |
| 4452 | 774.2218 | -152.6304 | -0.02703 | 4452 | 774.5054 | -150.0623 | -0.03763 | 4452 | 777.4562 | -148.6827 | -0.0411  | 4452 | 774.4464 | -147.4477 | -0.02781 | 4452</ |          |           |          |

|      |          |           |          |      |          |           |          |      |          |           |          |      |          |           |          |      |          |           |          |
|------|----------|-----------|----------|------|----------|-----------|----------|------|----------|-----------|----------|------|----------|-----------|----------|------|----------|-----------|----------|
| 4514 | 784.7163 | -153.3814 | -0.03307 | 4514 | 784.7908 | -152.5927 | -0.0378  | 4514 | 787.7895 | -151.9198 | -0.04165 | 4514 | 784.7673 | -149.9009 | -0.02805 | 4514 | 784.9186 | -155.66   | -0.03076 |
| 4515 | 784.8774 | -153.418  | -0.03306 | 4515 | 784.9503 | -152.6555 | -0.03781 | 4515 | 787.952  | -151.9877 | -0.04155 | 4515 | 784.9401 | -149.9793 | -0.02795 | 4515 | 785.1232 | -155.7297 | -0.03075 |
| 4516 | 785.0209 | -153.4504 | -0.033   | 4516 | 785.1464 | -152.7141 | -0.03795 | 4516 | 788.0895 | -152.0512 | -0.04152 | 4516 | 785.1316 | -150.0459 | -0.02796 | 4516 | 785.278  | -155.7885 | -0.03081 |
| 4517 | 785.2119 | -153.4989 | -0.03305 | 4517 | 785.301  | -152.7794 | -0.03793 | 4517 | 788.2847 | -152.1195 | -0.04164 | 4517 | 785.2681 | -150.1183 | -0.02807 | 4517 | 785.4336 | -155.8555 | -0.03082 |
| 4518 | 785.3688 | -153.5377 | -0.03311 | 4518 | 785.4604 | -152.8422 | -0.03786 | 4518 | 788.3991 | -152.1725 | -0.04175 | 4518 | 785.4458 | -150.1878 | -0.02811 | 4518 | 785.5878 | -155.9137 | -0.03075 |
| 4519 | 785.5372 | -153.5873 | -0.0331  | 4519 | 785.6138 | -152.9103 | -0.03781 | 4519 | 788.6119 | -152.2277 | -0.04166 | 4519 | 785.611  | -150.2603 | -0.02801 | 4519 | 785.782  | -155.9844 | -0.03073 |
| 4520 | 785.6876 | -153.6289 | -0.033   | 4520 | 785.8151 | -152.9743 | -0.03793 | 4520 | 788.7559 | -152.2742 | -0.04156 | 4520 | 785.803  | -150.3178 | -0.02799 | 4520 | 785.9448 | -156.0422 | -0.03082 |
| 4521 | 785.8633 | -153.6901 | -0.03303 | 4521 | 785.9548 | -153.0367 | -0.03799 | 4521 | 788.9414 | -152.3297 | -0.04164 | 4521 | 785.9421 | -150.3725 | -0.02805 | 4521 | 786.1018 | -156.1042 | -0.03088 |
| 4522 | 786.0438 | -153.7422 | -0.03313 | 4522 | 786.1271 | -153.0973 | -0.03789 | 4522 | 789.12   | -152.3776 | -0.04172 | 4522 | 786.119  | -150.42   | -0.02808 | 4522 | 786.254  | -156.1585 | -0.03083 |
| 4523 | 786.1988 | -153.8026 | -0.03314 | 4523 | 786.2744 | -153.1604 | -0.03781 | 4523 | 789.2896 | -152.4275 | -0.0417  | 4523 | 786.2705 | -150.4712 | -0.02798 | 4523 | 786.4321 | -156.2263 | -0.03081 |
| 4524 | 786.3548 | -153.8564 | -0.03308 | 4524 | 786.4728 | -153.216  | -0.03793 | 4524 | 789.4312 | -152.4701 | -0.04157 | 4524 | 786.474  | -150.5136 | -0.02791 | 4524 | 786.6169 | -156.2828 | -0.0309  |
| 4525 | 786.5267 | -153.9228 | -0.03309 | 4525 | 786.6274 | -153.2671 | -0.03802 | 4525 | 789.6174 | -152.5216 | -0.04161 | 4525 | 786.6069 | -150.5524 | -0.0279  | 4525 | 786.7582 | -156.3428 | -0.03095 |
| 4526 | 786.7104 | -153.9789 | -0.03317 | 4526 | 786.7994 | -153.3141 | -0.03794 | 4526 | 789.7961 | -152.5661 | -0.04172 | 4526 | 786.7782 | -150.5993 | -0.02806 | 4526 | 786.9244 | -156.3985 | -0.03087 |
| 4527 | 786.8594 | -154.0413 | -0.03318 | 4527 | 786.9334 | -153.3636 | -0.0379  | 4527 | 789.9495 | -152.6136 | -0.0417  | 4527 | 786.9341 | -150.6455 | -0.02796 | 4527 | 787.0967 | -156.4608 | -0.03082 |
| 4528 | 787.02   | -154.0985 | -0.03309 | 4528 | 787.1494 | -153.4143 | -0.03796 | 4528 | 790.1003 | -152.6537 | -0.04157 | 4528 | 787.1394 | -150.6951 | -0.02788 | 4528 | 787.2781 | -156.5159 | -0.03086 |
| 4529 | 787.1816 | -154.1607 | -0.03307 | 4529 | 787.2937 | -153.4587 | -0.03805 | 4529 | 790.2729 | -152.7036 | -0.04161 | 4529 | 787.2745 | -150.742  | -0.02794 | 4529 | 787.4244 | -156.5742 | -0.03091 |
| 4530 | 787.3713 | -154.2203 | -0.03313 | 4530 | 787.4638 | -153.5082 | -0.03797 | 4530 | 790.4578 | -152.7458 | -0.04173 | 4530 | 787.4423 | -150.7965 | -0.02803 | 4530 | 787.5907 | -156.6264 | -0.03085 |
| 4531 | 787.5242 | -154.2849 | -0.03314 | 4531 | 787.6051 | -153.5567 | -0.03787 | 4531 | 790.619  | -152.7926 | -0.04177 | 4531 | 787.6014 | -150.8501 | -0.02799 | 4531 | 787.7556 | -156.687  | -0.0308  |
| 4532 | 787.6887 | -154.3449 | -0.03307 | 4532 | 787.8131 | -153.6115 | -0.03788 | 4532 | 790.7781 | -152.8345 | -0.04164 | 4532 | 787.7928 | -150.9061 | -0.02789 | 4532 | 787.9475 | -156.741  | -0.03084 |
| 4533 | 787.8399 | -154.4168 | -0.03303 | 4533 | 787.9612 | -153.6574 | -0.038   | 4533 | 790.9432 | -152.8832 | -0.04165 | 4533 | 787.9466 | -150.9571 | -0.02795 | 4533 | 788.0894 | -156.7994 | -0.03093 |
| 4534 | 788.0249 | -154.4852 | -0.0331  | 4534 | 788.1266 | -153.71   | -0.03798 | 4534 | 791.1427 | -152.9272 | -0.0418  | 4534 | 788.1135 | -151.0116 | -0.02803 | 4534 | 788.2578 | -156.8504 | -0.03089 |
| 4535 | 788.1833 | -154.5553 | -0.03312 | 4535 | 788.2706 | -153.7553 | -0.03784 | 4535 | 791.2936 | -152.9744 | -0.04184 | 4535 | 788.2719 | -151.0671 | -0.02802 | 4535 | 788.4219 | -156.9135 | -0.03082 |
| 4536 | 788.3513 | -154.6237 | -0.03303 | 4536 | 788.4755 | -153.8167 | -0.03788 | 4536 | 791.4582 | -153.0171 | -0.04171 | 4536 | 788.4635 | -151.1229 | -0.02791 | 4536 | 788.6194 | -156.9674 | -0.03081 |
| 4537 | 788.5068 | -154.698  | -0.033   | 4537 | 788.639  | -153.8655 | -0.038   | 4537 | 791.613  | -153.0636 | -0.04165 | 4537 | 788.616  | -151.1722 | -0.02792 | 4537 | 788.7521 | -157.024  | -0.03085 |
| 4538 | 788.7084 | -154.7653 | -0.03306 | 4538 | 788.8019 | -153.9188 | -0.03804 | 4538 | 791.8124 | -153.1111 | -0.0418  | 4538 | 788.7796 | -151.2311 | -0.02804 | 4538 | 788.9244 | -157.0785 | -0.03086 |
| 4539 | 788.8599 | -154.8273 | -0.0331  | 4539 | 788.9471 | -153.9606 | -0.03796 | 4539 | 791.9153 | -153.1403 | -0.04188 | 4539 | 788.9455 | -151.285  | -0.02805 | 4539 | 789.0795 | -157.1373 | -0.03076 |
| 4540 | 789.0267 | -154.8847 | -0.03305 | 4540 | 789.144  | -154.0115 | -0.03791 | 4540 | 792.1295 | -153.1788 | -0.04178 | 4540 | 789.1351 | -151.3418 | -0.02795 | 4540 | 789.2814 | -157.192  | -0.03073 |
| 4541 | 789.1767 | -154.9422 | -0.033   | 4541 | 789.3034 | -154.0485 | -0.03806 | 4541 | 792.2744 | -153.2148 | -0.04172 | 4541 | 789.289  | -151.3911 | -0.02792 | 4541 | 789.4175 | -157.243  | -0.03081 |
| 4542 | 789.3734 | -154.9984 | -0.03304 | 4542 | 789.4606 | -154.086  | -0.03812 | 4542 | 792.476  | -153.2496 | -0.04184 | 4542 | 789.4487 | -151.4501 | -0.02804 | 4542 | 789.5993 | -157.2993 | -0.03086 |
| 4543 | 789.5216 | -155.0455 | -0.0331  | 4543 | 789.6255 | -154.1166 | -0.03804 | 4543 | 792.6231 | -153.2878 | -0.04195 | 4543 | 789.6196 | -151.5026 | -0.0281  | 4543 | 789.7526 | -157.3541 | -0.0308  |
| 4544 | 789.6901 | -155.0942 | -0.03309 | 4544 | 789.8038 | -154.1584 | -0.038   | 4544 | 792.7827 | -153.3228 | -0.04185 | 4544 | 789.8044 | -151.5575 | -0.02803 | 4544 | 789.9544 | -157.4119 | -0.03077 |
| 4545 | 789.8307 | -155.1415 | -0.03304 | 4545 | 789.9743 | -154.1934 | -0.03809 | 4545 | 792.9287 | -153.3611 | -0.04173 | 4545 | 789.9733 | -151.5998 | -0.02801 | 4545 | 790.1022 | -157.4614 | -0.03083 |
| 4546 | 790.0438 | -155.196  | -0.03308 | 4546 | 790.1296 | -154.2392 | -0.03813 | 4546 | 793.1378 | -153.337  | -0.04181 | 4546 | 790.1132 | -151.6462 | -0.02813 | 4546 | 790.2642 | -157.5176 | -0.03088 |
| 4547 | 790.184  | -155.2438 | -0.03314 | 4547 | 790.2907 | -154.2773 | -0.03805 | 4547 | 793.2834 | -153.4418 | -0.04188 | 4547 | 790.291  | -151.6903 | -0.02819 | 4547 | 790.4233 | -157.5715 | -0.03084 |
| 4548 | 790.3517 | -155.3002 | -0.03315 | 4548 | 790.4658 | -154.3318 | -0.03798 | 4548 | 793.4556 | -153.4773 | -0.04186 | 4548 | 790.4742 | -151.7305 | -0.02811 | 4548 | 790.6207 | -157.626  | -0.03077 |
| 4549 | 790.4957 | -155.3532 | -0.03308 | 4549 | 790.6055 | -154.3794 | -0.03807 | 4549 | 793.6088 | -153.5066 | -0.0417  | 4549 | 790.6393 | -151.7615 | -0.02809 | 4549 | 790.7591 | -157.6709 | -0.03083 |
| 4550 | 790.6909 | -155.4169 | -0.03305 | 4550 | 790.7943 | -154.4338 | -0.03813 | 4550 | 793.8061 | -153.5374 | -0.04174 | 4550 | 790.7809 | -151.7968 | -0.0281  | 4550 | 790.9269 | -157.7245 | -0.03092 |
| 4551 | 790.8511 | -155.4709 | -0.03307 | 4551 | 790.9619 | -154.4842 | -0.03808 | 4551 | 793.9587 | -153.5684 | -0.04192 | 4551 | 790.9634 | -151.8312 | -0.02824 | 4551 | 791.0639 | -157.776  | -0.03086 |
| 4552 | 791.0113 | -155.5227 | -0.03304 | 4552 | 791.1353 | -154.5416 | -0.03803 | 4552 | 794.1277 | -153.6442 | -0.04193 | 4552 | 791.1354 | -151.8651 | -0.02817 | 4552 | 791.2799 | -157.8305 | -0.03081 |
| 4553 | 791.1633 | -155.5882 | -0.03293 | 4553 | 791.3215 | -154.5925 | -0.03812 | 4553 | 794.2703 | -153.7447 | -0.04183 | 4553 | 791.3088 | -151.8939 | -0.02809 | 4553 | 791.4337 | -157.876  | -0.03086 |
| 4554 | 791.3615 | -155.6547 | -0.03286 | 4554 | 791.4634 | -154.6452 | -0.03819 | 4554 | 794.4714 | -153.8126 | -0.04181 | 4554 | 791.4458 | -151.9278 | -0.02816 | 4554 | 791.5938 | -157.9336 | -0.03092 |
| 4555 | 791.5319 | -155.7061 | -0.0329  | 4555 | 791.6344 | -154.6922 | -0.03814 | 4555 | 794.6292 | -153.8626 | -0.04196 | 4555 | 791.6263 | -151.9679 | -0.02825 | 4555 | 791.7508 | -157.9869 | -0.03091 |
| 4556 | 791.6874 | -155.7625 | -0.03289 | 4556 | 791.7924 | -154.7414 | -0.03806 | 4556 | 794.7866 | -153.9173 | -0.042   | 4556 | 791.8024 | -152.0083 | -0.02817 | 4556 | 791.943  | -158.0468 | -0.03081 |
| 4557 | 791.8413 | -155.8102 | -0.03281 | 4557 | 791.9925 | -154.7847 | -0.03807 | 4557 | 794.9377 | -153.9624 | -0.04187 | 4557 | 791.9719 | -152.0465 | -0.02804 | 4557 | 792.1039 | -158.0952 | -0.03082 |
| 4558 | 792.026  | -155.8682 | -0.0328  | 4558 | 792.1319 | -154.8311 | -0.03816 | 4558 | 795.1307 | -154.0153 | -0.04182 | 4558 | 792.1084 | -152.0889 | -0.0281  | 4558 | 792.2516 | -158.1555 | -0.0309  |
| 4559 | 792.1965 | -155.9118 | -0.03288 | 4559 | 792.3009 | -154.8769 | -0.03814 | 4559 | 795.296  | -154.0655 | -0.04196 | 4559 | 792.2902 | -152.1386 | -0.02819 | 4559 | 792.4155 | -158.2118 | -0.03089 |
| 4560 | 792.3441 | -155.9652 | -0.03295 | 4560 | 792.4565 | -154.931  | -0.03801 | 4560 | 795.4539 | -154.0989 | -0.04201 | 4560 | 792.4566 | -152.1851 | -0.02814 | 4560 | 792.5984 | -158.274  | -0.0308  |
| 4561 | 792.5036 | -156.0192 | -0.03291 | 4561 | 792.6552 | -154.9817 | -0.03799 | 4561 | 795.6122 | -154.1327 | -0.04188 | 4561 | 792.6357 | -152.2344 | -0.02807 | 4561 | 792.7628 | -158.3259 | -0.03078 |
| 4562 | 792.6754 | -156.0396 | -0.03286 | 4562 | 792.7932 | -155.0351 | -0.03808 | 4562 | 795.7905 | -154.1789 | -0.04182 | 4562 | 792.7719 | -152.2813 | -0.02808 | 4562 | 792.9147 | -158.3877 | -0.03087 |
| 4563 | 792.8599 | -156.0752 | -0.03292 | 4563 | 792.9741 | -155.0923 | -0.03809 | 4563 | 795.9695 | -154.2191 | -0.04196 | 4563 | 792.9475 | -152.3373 | -0.0282  | 4563 | 793.0835 | -158.4447 | -0.03089 |
| 4564 | 793.0054 | -156.1124 | -0.03297 | 4564 | 793.1238 | -155.148  | -0.03798 | 4564 | 796.1169 | -154.2642 | -0.04204 | 4564 | 793.122  | -152.3904 | -0.02823 | 4564 | 793.2586 | -158.5067 | -0.03082 |
| 4565 | 793.1729 | -156.1453 | -0.03291 | 4565 | 793.2628 | -155.205  | -0.03796 | 4565 | 796.28   | -154.3016 | -0.04195 | 4565 | 793.2979 | -152.4465 | -0.0281  | 4565 |          |           |          |



Figure 4. DSC curves of PPAs

| PPU      |          |             |                 | PPSA     |          |             |                 | PPSI     |          |             |                 | PPST     |          |             |                 | PPSY     |          |             |                 |
|----------|----------|-------------|-----------------|----------|----------|-------------|-----------------|----------|----------|-------------|-----------------|----------|----------|-------------|-----------------|----------|----------|-------------|-----------------|
| Temp./°C | Time/min | DSC/(mW/mg) | Sensit./(uV/mW) |
| 28.702   | 2.12077  | 0.16066     | 3.67001         | 22.107   | 0        | 0.46534     | 3.66595         | 20.012   | 0        | 0.42966     | 3.66442         | 21.87    | 0        | 0.8635      | 3.66578         | 20.679   | 0.30053  | 0.0279      | 3.66492         |
| 29.202   | 2.14617  | 0.30257     | 3.67027         | 22.607   | 0.55053  | 0.0687      | 3.66663         | 20.512   | 0.27529  | -0.36831    | 3.66648         | 22.37    | 0.49728  | 0.15923     | 3.66611         | 21.179   | 0.35723  | 0.14247     | 3.66529         |
| 29.702   | 2.17309  | 0.43668     | 3.67052         | 23.107   | 0.63381  | 0.0913      | 3.66664         | 21.012   | 0.3299   | -0.25791    | 3.66517         | 22.87    | 0.60306  | 0.2155      | 3.66648         | 21.679   | 0.4149   | 0.22158     | 3.66565         |
| 30.202   | 2.20224  | 0.55798     | 3.67077         | 23.607   | 0.7208   | 0.10816     | 3.66697         | 21.512   | 0.38329  | -0.12615    | 3.66553         | 23.37    | 0.69444  | 0.23183     | 3.66682         | 22.179   | 0.47939  | 0.26069     | 3.666           |
| 30.702   | 2.23479  | 0.65753     | 3.67101         | 24.107   | 0.81442  | 0.11557     | 3.6673          | 22.012   | 0.44477  | -0.43404    | 3.66588         | 23.87    | 0.7839   | 0.2276      | 3.66715         | 22.679   | 0.53768  | 0.26899     | 3.66635         |
| 31.202   | 2.27286  | 0.72342     | 3.67125         | 24.607   | 0.91426  | 0.11469     | 3.66762         | 22.512   | 0.50884  | 0.0941      | 3.66623         | 24.37    | 0.87618  | 0.21643     | 3.66747         | 23.179   | 0.61937  | 0.25047     | 3.66669         |
| 31.702   | 2.3084   | 0.73941     | 3.67148         | 25.107   | 1.01719  | 0.10641     | 3.66794         | 33.012   | 0.58346  | 0.14901     | 3.66657         | 24.87    | 0.97262  | 0.20603     | 3.66779         | 23.679   | 0.70273  | 0.21558     | 3.66702         |
| 32.202   | 2.38979  | 0.66288     | 3.6717          | 25.607   | 1.11997  | 0.0996      | 3.66825         | 23.512   | 0.67471  | 0.15014     | 3.66691         | 25.37    | 1.07225  | 0.20052     | 3.66841         | 24.179   | 0.80997  | 0.18641     | 3.66735         |
| 32.702   | 2.50851  | 0.4211      | 3.67191         | 26.107   | 1.22128  | 0.0948      | 3.66855         | 24.012   | 0.78181  | 0.11301     | 3.66724         | 25.87    | 1.17308  | 0.20008     | 3.66824         | 24.679   | 0.92176  | 0.17554     | 3.66767         |
| 33.202   | 2.63336  | 0.20693     | 3.67212         | 26.607   | 1.32133  | 0.092       | 3.66884         | 24.512   | 0.89221  | 0.0797      | 3.66756         | 26.37    | 1.27369  | 0.20158     | 3.6687          | 25.179   | 1.0361   | 0.17887     | 3.66798         |
| 33.702   | 2.76607  | 0.15543     | 3.67233         | 27.107   | 1.42076  | 0.0892      | 3.66913         | 25.012   | 0.99747  | 0.0653      | 3.66788         | 26.87    | 1.37371  | 0.2021      | 3.66899         | 25.679   | 1.12801  | 0.18509     | 3.66829         |
| 34.202   | 2.86273  | 0.15888     | 3.67252         | 27.607   | 1.52013  | 0.0867      | 3.66941         | 25.512   | 1.09812  | 0.0638      | 3.66819         | 27.37    | 1.47332  | 0.20238     | 3.66928         | 26.179   | 1.22947  | 0.1894      | 3.66859         |
| 34.702   | 2.95445  | 0.17505     | 3.67271         | 28.107   | 1.61971  | 0.082       | 3.66969         | 26.012   | 1.19679  | 0.067       | 3.66849         | 27.87    | 1.57282  | 0.20155     | 3.66956         | 26.679   | 1.32812  | 0.19116     | 3.66888         |
| 35.202   | 3.04611  | 0.18704     | 3.6729          | 28.607   | 1.71948  | 0.0784      | 3.66996         | 26.512   | 1.29539  | 0.0697      | 3.66879         | 28.37    | 1.67243  | 0.20064     | 3.66983         | 27.179   | 1.42728  | 0.19663     | 3.66917         |
| 35.702   | 3.13962  | 0.18961     | 3.67307         | 29.107   | 1.81938  | 0.0743      | 3.67022         | 27.012   | 1.39466  | 0.0697      | 3.66908         | 28.87    | 1.7719   | 0.19988     | 3.6701          | 27.679   | 1.52708  | 0.19938     | 3.66945         |
| 36.202   | 3.23514  | 0.18705     | 3.67324         | 29.607   | 1.91932  | 0.071       | 3.67048         | 27.512   | 1.49459  | 0.0681      | 3.66936         | 29.37    | 1.87205  | 0.19829     | 3.67036         | 28.179   | 1.62729  | 0.199       | 3.66973         |
| 36.702   | 3.33189  | 0.18246     | 3.67341         | 30.107   | 2.01924  | 0.0673      | 3.67072         | 28.012   | 1.59484  | 0.0656      | 3.66964         | 29.87    | 1.97196  | 0.19909     | 3.67061         | 28.679   | 1.72759  | 0.18856     | 3.67            |
| 37.202   | 3.42919  | 0.17928     | 3.67357         | 30.607   | 2.11916  | 0.0646      | 3.67097         | 28.512   | 1.69508  | 0.063       | 3.66991         | 30.37    | 2.07187  | 0.19814     | 3.67085         | 29.179   | 1.82811  | 0.18836     | 3.67026         |
| 37.702   | 3.5268   | 0.17777     | 3.67372         | 31.107   | 2.21907  | 0.0621      | 3.6712          | 29.012   | 1.79526  | 0.0616      | 3.67017         | 30.87    | 2.17179  | 0.19763     | 3.67109         | 29.679   | 1.92793  | 0.18889     | 3.67051         |
| 38.202   | 3.62485  | 0.17797     | 3.67386         | 31.607   | 2.31899  | 0.0598      | 3.67143         | 29.512   | 1.89537  | 0.0609      | 3.67043         | 31.37    | 2.27173  | 0.19723     | 3.67133         | 30.179   | 2.02799  | 0.18877     | 3.67076         |
| 38.702   | 3.72353  | 0.17729     | 3.674           | 32.107   | 2.41892  | 0.0573      | 3.67166         | 30.012   | 1.99543  | 0.0603      | 3.67068         | 31.87    | 2.37169  | 0.19619     | 3.67155         | 30.679   | 2.12805  | 0.18925     | 3.671           |
| 39.202   | 3.82293  | 0.17612     | 3.67413         | 32.607   | 2.51885  | 0.0545      | 3.67187         | 30.512   | 2.0955   | 0.0593      | 3.67092         | 32.37    | 2.47168  | 0.19607     | 3.67177         | 31.179   | 2.22814  | 0.18996     | 3.67124         |
| 39.702   | 3.92296  | 0.17446     | 3.67426         | 33.107   | 2.6188   | 0.0531      | 3.67208         | 31.012   | 2.19552  | 0.0585      | 3.67116         | 32.87    | 2.57168  | 0.19562     | 3.67199         | 31.679   | 2.32825  | 0.18969     | 3.67147         |
| 40.202   | 4.02343  | 0.17245     | 3.67438         | 33.607   | 2.71878  | 0.0511      | 3.67229         | 31.512   | 2.29554  | 0.0587      | 3.67139         | 33.37    | 2.67171  | 0.19533     | 3.67219         | 32.179   | 2.42835  | 0.18865     | 3.67169         |
| 40.702   | 4.12414  | 0.16989     | 3.67449         | 34.107   | 2.81877  | 0.0496      | 3.67249         | 32.012   | 2.39552  | 0.0583      | 3.67162         | 33.87    | 2.77182  | 0.19493     | 3.67239         | 32.679   | 2.52845  | 0.18815     | 3.6719          |
| 41.202   | 4.22496  | 0.16855     | 3.6746          | 34.607   | 2.9188   | 0.0485      | 3.67268         | 32.512   | 2.49547  | 0.0575      | 3.67183         | 34.37    | 2.87193  | 0.19409     | 3.67259         | 33.179   | 2.62843  | 0.18869     | 3.67211         |
| 41.702   | 4.32582  | 0.1677      | 3.6747          | 35.107   | 3.01883  | 0.0471      | 3.67286         | 33.012   | 2.5954   | 0.0575      | 3.67205         | 34.87    | 2.97201  | 0.19416     | 3.67278         | 33.679   | 2.7284   | 0.18853     | 3.67232         |
| 42.202   | 4.4267   | 0.16652     | 3.67479         | 35.607   | 3.11884  | 0.0463      | 3.67304         | 33.512   | 2.6953   | 0.0569      | 3.67225         | 35.37    | 3.07204  | 0.19361     | 3.67296         | 34.179   | 2.82837  | 0.18768     | 3.67251         |
| 42.702   | 4.5276   | 0.16574     | 3.67488         | 36.107   | 3.21884  | 0.0453      | 3.67321         | 34.012   | 2.7952   | 0.0571      | 3.67245         | 35.87    | 3.17202  | 0.19352     | 3.67313         | 34.679   | 2.92831  | 0.18781     | 3.6727          |
| 43.202   | 4.62848  | 0.1658      | 3.67496         | 36.607   | 3.31878  | 0.0445      | 3.67338         | 34.512   | 2.89515  | 0.0571      | 3.67264         | 36.37    | 3.27197  | 0.19375     | 3.6733          | 35.179   | 3.02824  | 0.18733     | 3.67289         |
| 43.702   | 4.72931  | 0.16447     | 3.67504         | 37.107   | 3.41872  | 0.0437      | 3.67354         | 35.012   | 2.99516  | 0.0565      | 3.67283         | 36.87    | 3.37191  | 0.19332     | 3.67346         | 35.679   | 3.12816  | 0.18716     | 3.67308         |
| 44.202   | 4.83009  | 0.16313     | 3.67511         | 37.607   | 3.5187   | 0.0434      | 3.67369         | 35.512   | 3.09522  | 0.0562      | 3.67301         | 37.37    | 3.47187  | 0.19267     | 3.67362         | 36.179   | 3.22829  | 0.18664     | 3.67324         |
| 44.702   | 4.93079  | 0.1625      | 3.67517         | 38.107   | 3.6187   | 0.0431      | 3.67384         | 36.012   | 3.19532  | 0.0553      | 3.67318         | 37.87    | 3.57187  | 0.19311     | 3.67377         | 36.679   | 3.32805  | 0.1863      | 3.6734          |
| 45.202   | 5.03143  | 0.16232     | 3.67523         | 38.607   | 3.71875  | 0.0433      | 3.67397         | 36.512   | 3.29544  | 0.0548      | 3.67335         | 38.37    | 3.67187  | 0.19249     | 3.67391         | 37.179   | 3.42811  | 0.18606     | 3.67356         |
| 45.702   | 5.13202  | 0.16188     | 3.67528         | 39.107   | 3.81882  | 0.0433      | 3.67411         | 37.012   | 3.39556  | 0.0542      | 3.67351         | 38.87    | 3.77188  | 0.19241     | 3.67405         | 37.679   | 3.52825  | 0.1853      | 3.67371         |
| 46.202   | 5.23257  | 0.16223     | 3.67532         | 39.607   | 3.91887  | 0.0433      | 3.67424         | 37.512   | 3.49567  | 0.0541      | 3.67366         | 39.37    | 3.87189  | 0.19185     | 3.67418         | 38.179   | 3.62843  | 0.18482     | 3.67386         |
| 46.702   | 5.33308  | 0.1615      | 3.67536         | 40.107   | 4.01889  | 0.0432      | 3.67436         | 38.012   | 3.59577  | 0.0541      | 3.67381         | 39.87    | 3.97187  | 0.19206     | 3.6743          | 38.679   | 3.72861  | 0.18404     | 3.67399         |
| 47.202   | 5.43356  | 0.16213     | 3.67539         | 40.607   | 4.11888  | 0.0432      | 3.67447         | 38.512   | 3.69584  | 0.0533      | 3.67395         | 40.37    | 4.07189  | 0.19223     | 3.67442         | 39.179   | 3.82874  | 0.18404     | 3.67413         |
| 47.702   | 5.534    | 0.16174     | 3.67541         | 41.107   | 4.21884  | 0.0434      | 3.67458         | 39.012   | 3.79592  | 0.0529      | 3.67408         | 40.87    | 4.17196  | 0.19271     | 3.67453         | 39.679   | 3.9288   | 0.18374     | 3.67425         |
| 48.202   | 5.63443  | 0.16205     | 3.67543         | 41.607   | 4.31881  | 0.0433      | 3.67468         | 39.512   | 3.89587  | 0.0526      | 3.67421         | 41.37    | 4.27209  | 0.19202     | 3.67465         | 40.179   | 4.02882  | 0.18332     | 3.67437         |
| 48.702   | 5.73483  | 0.16297     | 3.67544         | 42.107   | 4.4188   | 0.0435      | 3.67478         | 40.012   | 3.99582  | 0.0523      | 3.67433         | 41.87    | 4.37225  | 0.19163     | 3.67473         | 40.679   | 4.12881  | 0.18304     | 3.67449         |
| 49.202   | 5.8352   | 0.16359     | 3.67545         | 42.607   | 4.5188   | 0.043       | 3.67486         | 40.512   | 4.09575  | 0.0528      | 3.67445         | 42.37    | 4.47241  | 0.19158     | 3.67482         | 41.179   | 4.22877  | 0.18203     | 3.67459         |
| 49.702   | 5.93551  | 0.1643      | 3.67545         | 43.107   | 4.61883  | 0.0423      | 3.67495         | 41.012   | 4.19569  | 0.055       | 3.67456         | 42.87    | 4.57252  | 0.19179     | 3.67491         | 41.679   | 4.32877  | 0.1811      | 3.67469         |
| 50.202   | 6.03574  | 0.16575     | 3.67545         | 43.607   | 4.71887  | 0.0429      | 3.67502         | 41.512   | 4.29564  | 0.0538      | 3.67466         | 43.37    | 4.67257  | 0.19209     | 3.67499         | 42.179   | 4.42858  | 0.18146     | 3.67479         |
| 50.702   | 6.13595  | 0.16816     | 3.67543         | 44.107   | 4.81889  | 0.0416      | 3.67509         | 42.012   | 4.39563  | 0.0524      | 3.67476         | 43.87    | 4.77257  | 0.1921      | 3.67506         | 42.679   | 4.52846  | 0.18124     | 3.67488         |
| 51.202   | 6.23617  | 0.17095     | 3.67541         | 44.607   | 4.91893  | 0.0409      | 3.67516         | 42.512   | 4.49564  | 0.0524      | 3.67485         | 44.37    | 4.87251  | 0.19293     | 3.67513         | 43.179   | 4.62836  | 0.18147     | 3.67496         |
| 51.702   | 6.33646  | 0.1745      | 3.67539         | 45.107   | 5.01893  | 0.0409      | 3.67521         | 43.012   | 4.59564  | 0.0523      | 3.67493         | 44.87    | 4.97245  | 0.19373     | 3.67519         | 43.679   | 4.7284   | 0.18081     | 3.67503         |
| 52.202   | 6.43682  | 0.17969     | 3.67536         | 45.607   | 5.11891  | 0.0414      | 3.67527         | 43.512   | 4.69567  | 0.0528      | 3.67501         | 45.37    | 5.07239  | 0.19423     | 3.67524         | 44.179   | 4.82833  | 0.18044     | 3.67511         |
| 52.702   | 6.53718  | 0.18789     | 3.67532         | 46.107   | 5.21886  | 0.0417      | 3.67531         | 44.012   | 4.79565  | 0.0532      | 3.67508         | 45.87    | 5.17233  | 0.1949      | 3.67529         | 44.679   | 4.9284   | 0.18002     | 3.67517         |
| 53.202   | 6.63752  | 0.19795     | 3.67528         | 46.607   | 5.31881  | 0.0419      | 3.67535         | 44.512   | 4.89563  | 0.0532      | 3.67515         | 46.37    | 5.2723   | 0.19774     | 3.67533         | 45.179   | 5.02849  | 0.17959     | 3.67522         |
| 53.702   | 6.73777  | 0.21231     | 3.67523         | 47.107   | 5.41877  | 0.0419      | 3.67538         | 45.012   | 4.99561  | 0.0539      | 3.6752          | 46.87    | 5.37238  | 0.19916     | 3.67537         | 45.679   | 5.12857  | 0.17989     | 3.67527         |
| 54.      |          |             |                 |          |          |             |                 |          |          |             |                 |          |          |             |                 |          |          |             |                 |

Figure 6. The T-peel strength of the PPAs

|                                               | PPU   | PPSA  | PPSI  | PPST  | PPSY  |
|-----------------------------------------------|-------|-------|-------|-------|-------|
| Original peel strength (N/cm)                 | 61.37 | 79.56 | 66.17 | 79.56 | 84.41 |
| Peel strength after the second heating (N/cm) | 21.9  | 26.5  | 16.5  | 13.5  | 69.6  |

Figure 7. The particle size distribution of PPAs: (A) PPU, (B) PPSA, (C) PPSI, (D) PPST, (E) PPSY.

|                                     | A                       | B        | C        | D        | E       |
|-------------------------------------|-------------------------|----------|----------|----------|---------|
| Particle Diameter ( $\mu\text{m}$ ) | Differential Volume (%) |          |          |          |         |
| 0.3752                              | 0                       | 0        | 0        | 0.00151  | 0.00255 |
| 0.41188                             | 0                       | 0        | 0        | 0.0027   | 0.00454 |
| 0.45215                             | 0                       | 0        | 0        | 0.00392  | 0.00663 |
| 0.49635                             | 0                       | 0        | 0        | 0.00547  | 0.00928 |
| 0.54487                             | 0                       | 0        | 0        | 0.00657  | 0.01123 |
| 0.59814                             | 0                       | 0        | 0        | 0.00735  | 0.01269 |
| 0.65661                             | 0                       | 0        | 0        | 0.00787  | 0.01377 |
| 0.72081                             | 0                       | 0        | 0        | 0.0082   | 0.01456 |
| 0.79127                             | 0                       | 0        | 0        | 0.00818  | 0.01481 |
| 0.86863                             | 0                       | 0        | 0        | 0.00779  | 0.01448 |
| 0.95355                             | 0                       | 0        | 0        | 0.00712  | 0.01371 |
| 1.04677                             | 0                       | 0        | 0        | 0.00624  | 0.0126  |
| 1.14911                             | 0                       | 0        | 0        | 0.00527  | 0.0113  |
| 1.26145                             | 0                       | 0        | 0        | 0.00418  | 0.00977 |
| 1.38477                             | 0                       | 0        | 0        | 0.00311  | 0.0082  |
| 1.52015                             | 0                       | 0        | 0        | 0.00213  | 0.00669 |
| 1.66876                             | 0                       | 0        | 0        | 0.00139  | 0.00544 |
| 1.8319                              | 0                       | 0        | 0        | 8.66E-04 | 0.0044  |
| 2.011                               | 0                       | 0        | 0        | 5.78E-04 | 0.00362 |
| 2.2076                              | 0                       | 0        | 0        | 4.92E-04 | 0.00309 |
| 2.42342                             | 0                       | 0        | 0        | 5.99E-04 | 0.00284 |
| 2.66033                             | 0                       | 0        | 0        | 9.25E-04 | 0.00285 |
| 2.92042                             | 0                       | 0        | 0        | 0.00145  | 0.00304 |
| 3.20592                             | 9.22E-06                | 0        | 8.46E-05 | 0.00216  | 0.00344 |
| 3.51934                             | 2.23E-04                | 0        | 9.17E-04 | 0.00293  | 0.00397 |
| 3.8634                              | 0.00111                 | 0        | 0.00222  | 0.0038   | 0.00468 |
| 4.2411                              | 0.00257                 | 0        | 0.00319  | 0.00469  | 0.00551 |
| 4.65572                             | 0.0044                  | 0        | 0.00404  | 0.00569  | 0.00656 |
| 5.11087                             | 0.00657                 | 0        | 0.00464  | 0.00671  | 0.00777 |
| 5.61052                             | 0.00898                 | 0        | 0.00514  | 0.00777  | 0.0092  |
| 6.15902                             | 0.01155                 | 0        | 0.00562  | 0.00886  | 0.01087 |
| 6.76114                             | 0.01416                 | 0        | 0.00617  | 0.01     | 0.01278 |
| 7.42212                             | 0.01665                 | 0        | 0.00686  | 0.01136  | 0.01504 |
| 8.14773                             | 0.0187                  | 0        | 0.00766  | 0.0128   | 0.01757 |
| 8.94427                             | 0.02                    | 0        | 0.00862  | 0.01444  | 0.02062 |
| 9.81869                             | 0.02023                 | 0        | 0.00968  | 0.01598  | 0.02392 |
| 10.7786                             | 0.01974                 | 0        | 0.01078  | 0.01784  | 0.02781 |
| 11.8323                             | 0.01993                 | 0        | 0.01184  | 0.01989  | 0.03204 |
| 12.9891                             | 0.02377                 | 0        | 0.01275  | 0.02236  | 0.03693 |
| 14.2589                             | 0.0357                  | 0        | 0.01389  | 0.02502  | 0.04234 |
| 15.6529                             | 0.06031                 | 0        | 0.01594  | 0.02825  | 0.04847 |
| 17.1832                             | 0.10008                 | 0        | 0.01963  | 0.03328  | 0.05579 |
| 18.863                              | 0.14949                 | 0        | 0.02551  | 0.04173  | 0.06458 |
| 20.7071                             | 0.19442                 | 8.59E-05 | 0.03324  | 0.05622  | 0.07595 |
| 22.7315                             | 0.20774                 | 0.00212  | 0.04152  | 0.07838  | 0.09047 |
| 24.9538                             | 0.20947                 | 0.01108  | 0.04827  | 0.10976  | 0.10972 |
| 27.3934                             | 0.21444                 | 0.02456  | 0.05203  | 0.15046  | 0.13499 |
| 30.0714                             | 0.21852                 | 0.03287  | 0.05535  | 0.20079  | 0.16797 |
| 33.0113                             | 0.22755                 | 0.03163  | 0.06413  | 0.26169  | 0.21027 |
| 36.2385                             | 0.34197                 | 0.02573  | 0.08562  | 0.33472  | 0.26304 |

|         |         |         |         |         |         |
|---------|---------|---------|---------|---------|---------|
| 39.7813 | 0.47122 | 0.02722 | 0.1252  | 0.42258 | 0.32838 |
| 43.6704 | 0.53729 | 0.04727 | 0.17852 | 0.52731 | 0.4088  |
| 47.9397 | 0.54416 | 0.08881 | 0.23498 | 0.64972 | 0.50804 |
| 52.6264 | 0.61626 | 0.13218 | 0.29393 | 0.7881  | 0.6296  |
| 57.7713 | 0.89898 | 0.1476  | 0.3594  | 0.93845 | 0.77531 |
| 63.4192 | 0.9672  | 0.13951 | 0.42779 | 1.09634 | 0.94483 |
| 69.6192 | 1.08063 | 0.16002 | 0.51614 | 1.25875 | 1.13549 |
| 76.4253 | 1.02837 | 0.26358 | 0.67599 | 1.42602 | 1.34449 |
| 83.8969 | 1.12416 | 0.44885 | 0.90943 | 1.60139 | 1.57088 |
| 92.0988 | 1.13672 | 0.62215 | 1.0978  | 1.78922 | 1.81767 |
| 101.103 | 1.42288 | 0.71197 | 1.16409 | 1.99324 | 2.09254 |
| 110.987 | 2.39921 | 0.77741 | 1.24445 | 2.2146  | 2.40383 |
| 121.837 | 2.41741 | 0.94116 | 1.50175 | 2.45106 | 2.75229 |
| 133.748 | 2.55693 | 1.26403 | 1.91009 | 2.6957  | 3.12031 |
| 146.824 | 2.6698  | 1.68601 | 2.32224 | 2.93612 | 3.46717 |
| 161.177 | 2.79443 | 2.08863 | 2.67239 | 3.15689 | 3.73842 |
| 176.935 | 2.8105  | 2.43155 | 2.98219 | 3.34495 | 3.88917 |
| 194.232 | 3.27161 | 2.76919 | 3.26948 | 3.49751 | 3.91046 |
| 213.221 | 3.58662 | 3.12877 | 3.52085 | 3.6262  | 3.84143 |
| 234.066 | 3.6606  | 3.46816 | 3.70835 | 3.75424 | 3.75804 |
| 256.948 | 3.72653 | 3.77515 | 3.87005 | 3.90741 | 3.74513 |
| 282.068 | 3.9748  | 4.11701 | 4.14085 | 4.10233 | 3.86622 |
| 309.644 | 4.20647 | 4.59298 | 4.6298  | 4.33827 | 4.14446 |
| 339.916 | 4.775   | 5.25299 | 5.2726  | 4.59626 | 4.55245 |
| 373.147 | 5.10616 | 6.01532 | 5.85555 | 4.84385 | 5.01375 |
| 409.626 | 5.12523 | 6.71326 | 6.25029 | 5.0442  | 5.41648 |
| 449.672 | 5.20897 | 7.20319 | 6.4895  | 5.16032 | 5.63756 |
| 493.633 | 5.358   | 7.35038 | 6.51585 | 5.15518 | 5.57571 |
| 541.892 | 5.01687 | 7.08092 | 6.14004 | 4.99355 | 5.18293 |
| 594.869 | 4.98464 | 6.49553 | 5.32035 | 4.63883 | 4.46669 |
| 653.025 | 4.74849 | 5.73094 | 4.20149 | 4.05662 | 3.51255 |
| 716.866 | 3.87458 | 4.82406 | 3.02007 | 3.25733 | 2.45761 |
| 786.949 | 2.79773 | 3.84409 | 2.15696 | 2.30241 | 1.44165 |
| 863.883 | 1.8301  | 2.8705  | 1.84616 | 1.26909 | 0.64236 |
| 948.338 | 0.69643 | 1.81454 | 1.87297 | 0.4849  | 0.18461 |
| 1041.05 | 0.05897 | 0.72643 | 1.66741 | 0.09235 | 0.02702 |
| 1142.83 | 0       | 0.11693 | 0.3     | 0.00718 | 0.00125 |
| 1254.55 | 0       | 0.00363 | 0       | 0       | 0       |
| 1377.2  | 0       | 0       | 0.00746 | 0       | 0       |
| 1511.84 | 0       | 0       | 0       | 0       | 0       |
| 1659.64 | 0       | 0       | 0       | 0       | 0       |
| 1821.89 | 0       | 0       | 0       | 0       | 0       |

Figure. 9. SEM images of the samples: (A) PPU, (B) PPSI, (C) PPST, (D) PPSY.

PPU

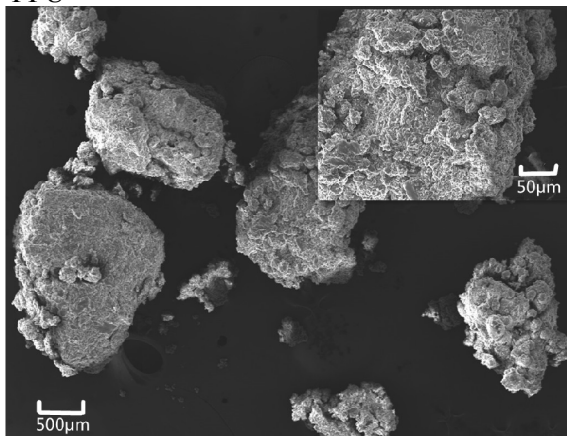

PPSI

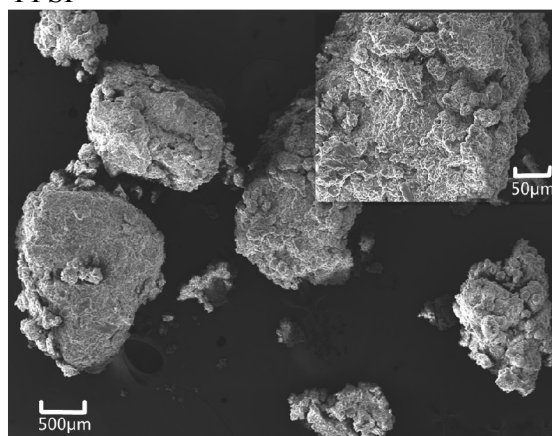

PPST

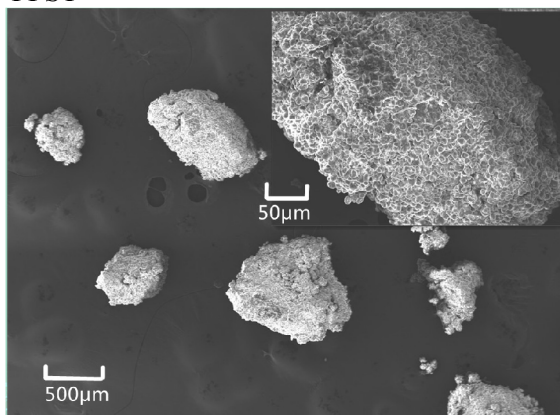

PPSY

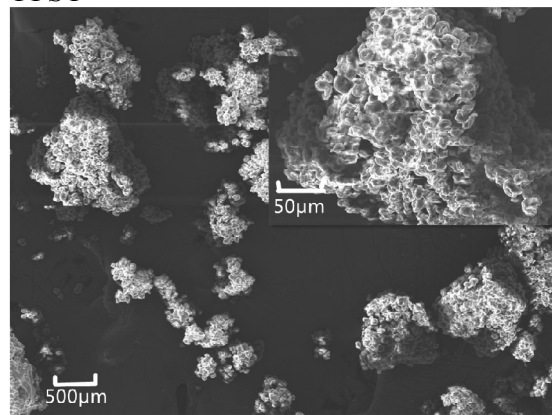

Figure 10. The effect of nano-silica content on the T-peel strength

|                                               | PPU   | PPSY1 | PPSY2 | PPSY3 |
|-----------------------------------------------|-------|-------|-------|-------|
| Original peel strength (N/cm)                 | 61.37 | 84.41 | 73.2  | 68.3  |
| Peel strength after the second heating (N/cm) | 21.9  | 69.6  | 53.6  | 49.3  |
